# Supplementary material for: Genomic Profiling of Adult and Pediatric B-cell Acute Lymphoblastic Leukemia
Source: PubMed Central journal article supplement — eBioMedicine. 2016 May 13;8:173–83. doi: 10.1016/j.ebiom.2016.04.038 (PMC4919728; doi:10.1016/j.ebiom.2016.04.038), 2016-05-13
Supplement: mmc1.pdf [file mmc1.pdf]

## Supplementary Methods

**Whole exome sequencing (WES), whole genome sequencing (WGS) and alignment** Exome regions were captured by the Agilent SureSelect Human All Exon 50Mb Kit and high-throughput DNA sequencing was performed on Illumina Genome Analyzer Ix (GAIIx) and HiSeq2000 according to the manufacturer's paired-end 2×120bp protocol. Libraries for whole genome sequencing were constructed using Illumina TruSeq Nano DNA Library Prep Kit and then sequenced on the HiSeq XTen platform. Read pairs were aligned to the human reference genome (hg19, downloaded from the UCSC Genome Browser<sup>1</sup> by BWA<sup>2</sup> (version 0.7.5a). Samtools<sup>3</sup> (version 0.1.19) were applied to generate chromosomal coordinate-sorted bam files and to remove PCR duplications. Afterwards, the reads were realigned around potential small inversion and deletion (indel) regions by GATK<sup>4</sup> (version 2.6.5) IndelRealigner following the recommended pipeline. For each WES sample, the median depth was 122.8× (range 61.6×~301.5×), with 97.4% (range 76.7%~98.4%) of the target sequence in median being covered sufficiently deep for variant calling ( $\geq 10\times$  coverage). For WGS, among the 33Mb coding regions according to the RefSeq database, 91.2% in median were covered with sufficient depth ( $\geq 10\times$ ) (Table S15).

**Somatic copy number variation (CNV) detection** The DNA from tumor samples and matched germline controls were prepared for hybridization to Illumina high density Genome Wide Human 660W Quad\_v1 (~660k probes, for sample ID starting with "A" and "C") and Affymetrix GenomeWide Human SNP 6.0 (~1.85 million probes, for sample ID starting with "B") arrays according to the manufacturer's protocol. The Genotyping Module of Genome Studio software and PennCNV-Affy<sup>5</sup> package were applied to process raw intensity files from Illumina (\*.idat) or Affymetrix (\*.cel) platforms, respectively. Based on the normalized Log R Ratio (LRR) and B Allele Frequency (BAF) information extracted from the raw intensity files, somatic genomic alterations in paired samples were detected by OncoSNP<sup>6</sup> (version 1.1) and Bioconductor "VanillaICE" package.<sup>7</sup> To verify the reliability of recurrent CNVs events, all the reported regions were plotted based on their LRR and BAF by R statistical software version 3.2.2 and visually checked. CNV segments Gain Or Loss scores were calculated by R "cghMCR" packages. The somatic alterations greater or less than two standard deviations away from the mean were applied as significant amplifications or deletions.

**Single nucleotide variation (SNV)/indel calling and filter workflow** MuTect<sup>8</sup> (version 1.1.4) and GATK<sup>9</sup> Haplotype Caller were applied to call SNVs and indels, respectively. GATK Unified Genotyper was also used to call both SNVs and indels. SNVs and indels detected by the above softwares were subsequently filtered by a homemade pipeline to exclude: 1) mutations with low consensus confidence score; 2) germline mutations detected from control samples; 3) mutations with low sequencing depth in germline control; 4) mutations reported in dbSNP 138 as common SNPs.

**Somatic SNV/indel annotation** The potential somatic SNVs and indels were mapped to the genome location using the SeattleSeq Annotation 137 server<sup>10</sup> and Oncotator.<sup>11</sup> All the non-silent mutations, including missense, nonsense and splice site for SNVs, as well as in-frame, frameshift and splice site for indels, were obtained and visually inspected to exclude potential false positive results.

**RNA sequencing (RNA-seq) and fusion gene detection** Total RNA was purified by TruSeq® RNA Sample Preparation Kit v2 (Illumina), and the quality was verified by Agilent Bioanalyzer 2100. Libraries were prepared according to Illumina standard protocol and paired-end 2×101bp reads were produced by Illumina HiSeq2000. Data were aligned against the human reference genome hg19 using TopHat<sup>12,13</sup> (Version 2.0.13) and Cufflinks<sup>14</sup> (Version 2.2.1) was used to assemble aligned reads into transcripts. HTSeq<sup>15</sup> was used to generate a counts table from Cufflinks output. DESeq2<sup>16,17</sup> (Version v1.8.1) was used to calculate normalized read counts for each gene and/or transcript and to perform expression analysis. FusionCatcher<sup>18</sup> (Version 0.99.3d) and Defuse<sup>19</sup> (Version 0.6.2) were used for finding somatic fusion genes such that there were at least 2 split reads and

3 spanning reads in the analyzed RNA-seq data. For the fusions that may result in fusion proteins, we further estimated their impact to the open reading frames based on the predicted break points and adjacent sequences. Crest<sup>20</sup> (Version 1.0) was used for identifying somatic fusion genes in the WGS data. Recurrent *MEF2D* and *ZNF384* related fusion genes were further assessed by the multiplex-nested reverse transcriptase (RT)-PCR amplification in a large cohort of validated patients using primers listed in Table S16. For the expression of *DUX4*, paired-end reads were mapped to the *DUX4* cDNA sequence (NM\_001293798) using the TopHat (Version 2.0.13) computational pipeline using default parameters. Subsequently we counted reads with SAMtools (version 0.1.19).

**Gene expression analysis and gene set enrichment analysis (GSEA)** All gene expression data from RNA-seq experiment were normalized together using variance stabilizing transformation in the DESeq2 package to remove any technical or spurious background variation.<sup>16,17</sup> The top 864 genes (about 5 percent) were selected only based on the highest variability of gene expression across samples. Unsupervised hierarchical clustering was performed with ward method in R “gplots” package. The distance was based on the Pearson correlation coefficient. The height 1 was applied as the cut-point to generate eight sample groups. GSEA<sup>21</sup> and gene-set collection of KEGG pathways were used for enrichment analysis. *P* values were calculated by 1,000-gene-set two-sided permutation tests.

**Mutation validation** All the somatic non-silent SNVs, indels and fusion genes discovered by exome or transcriptome sequencing were subject to validation in the original genomic DNA samples. The regions containing the mutation events were amplified by PCR and sequenced by Sanger sequencing. PCR primers were designed by Primer Premier 5.0 (PREMIER Biosoft).

**Targeted deep sequencing** The genes for targeted deep sequencing were selected mainly on the mutation significance analysis of genomic data<sup>22</sup> (Table S17). Access Array™ System (Fluidigm) and subsequent Illumina Sequencing Platform were used to perform targeted deep sequencing for 48 gene markers from bone marrow (BM) samples at diagnosis in recurrent cohort. The PCR primers were designed by iPLEX AssayDesigner software (Sequenom) for multiplex reaction from uniplex up to 10plex. Multiplexed libraries of tagged amplicons were generated by the 48.48 Access Array microfluidic platform (Fluidigm) and deep sequencing was carried out on Illumina MiSeq. The control DNA was obtained from matching peripheral blood during complete remission or from saliva samples. Among cases without such control samples, the gene mutations were subject to mass spectrum detection in a cohort of 768 normal individuals to eliminate possible single nucleotide polymorphisms.

**Plasmids construction** The wild type cDNA clones were kindly provided by OriGene, and all of the wild type and fusion plasmids were constructed into Migr1 retroviral vector expressing GFP with a flag or myc tag. All recombinant plasmids were verified by DNA sequencing.

**Luciferase assays** The promoter region of *HDAC9* was cloned into the pGL4.15 firefly luciferase reporter vector (Promega, Madison, WI). The *HDAC9* reporter construct, a Renilla luciferase vector used for control of transfection efficiency, and wild type *MEF2D* or *MEF2D* fusion expression plasmids were cotransfected into 293T cells using Lipofectamin 2000. Twenty-four hours after transfection, cells were harvested for determination of luciferase activities using the Dual-luciferase reporter assay kit (Promega).

**Transient transfection and qPCR** Plasmid constructs and *HDAC9* shRNAs (Shanghai Genechem Co., LTD) were co-introduced into JM1 cells using Lipofectamin 2000. Forty-eight hours after transfection, isolated RNA was

reversetranscribed into cDNA using random primer and MMLV (Invitrogen). The expression levels of *HDAC9* and *RAG1* were quantified using qRT-PCR with SYBR green (Takara) on ABIPRISM 7500.

**Chromatin Immunoprecipitation** ChIP assays were performed using the ChIP-IT High Sensitivity Kit (Active Motif) according to the manufacturer's standard protocol. ChIP DNA was quantified using primers specific for *HDAC9* gene promoter.

**Mouse keeping, retrovirus packaging, BM transplantation** Mice used in this study were housed in the specific pathogen free circumstance in Research Center for Experimental Medicine at Rui Jin Hospital Affiliated to Shanghai Jiao Tong University School of Medicine. Male BALB/c mice (aged 8–10 weeks and weight 25±2 g, n=16) and female BALB/c mice (aged 8–10 weeks and weight 22±2g, n=32) were raised in a temperature (22±1°C) and humidity (55±5%) controlled room with 12 hours of light and 12 hours of dark a day. All animal experiments were conducted following the institutional ethical guidelines on animal care and were approved by the Animal Care and Use Committee of Shanghai Jiao Tong University School of Medicine.

Retroviral supernatants were generated by co-transfecting 293T cells with recombinant plasmids and ecopac retroviral packaging plasmid using Lipofectamin 2000. BM cells were isolated from male BALB/c mice that received 5-fluorouracil (150 mg/kg) 5 days before harvest. Mobilized cells were infected with retroviruses in IMDM supplemented with 20% FBS, IL-3 (10 ng/mL), IL-6 (10 ng/mL), IL-7 (10 ng/mL), SCF (50 ng/mL), Flt3L (50 ng/mL), and 5ug/mL polybrene. All cytokines were acquired from R&D Systems. After 24-hour infection, cells were randomly injected into lethally irradiated recipient female BALB/c mice through the tail vein (n=8 for each group). Two weeks after transplantation, peripheral blood was collected to analyze the percentage of GFP positive cells to evaluate the efficiency of transplantation. These mice were accessed daily and the peripheral hemogram was monitored every two weeks. For necessary analyzed items, these mice could be sacrificed.

**Fluorescence-activated cell sorter analysis of BM cells** For flow cytometry analysis, antibodies against Mac-1 (M1/70), Gr-1 (RB6-8C5), CD3(17A2), CD45R/B220 (eBioR2/60), CD19 (1D3), CD117 (2B8), and cocktail of lineage antibodies against Mac-1, Gr-1, B220, Ter119, and CD3 (BD Pharmingen) were used. Analysis was performed on LSR Fortessa™ X-20 (BD Biosciences).

**In vitro B cell differentiation** Mouse BM lineage negative (Lin<sup>-</sup>) cells were isolated using a lineage depletion kit (Miltenyi Biotec Inc., Auburn, CA) according to the manufacturer's instructions, then c-Kit<sup>Low</sup> cells were sorted by MoFlo cell sorter (Dako, Carpinteria, CA). Lin<sup>-</sup> c-Kit<sup>Low</sup> cells were infected with retroviruses in the same condition as mobilized cells. Infected cells were then cultured for 7 days on an OP9 monolayer in IMDM containing SCF (20 ng/mL), Flt3L (50 ng/mL), and IL-7 (20 ng/mL).<sup>23</sup> The lymphoid lineage differentiation capacity of GFP positive cells was assessed by flow cytometry.

## Supplementary Results

**Characteristic expression profiles of G3, G4, G6, G7 and G8** In addition to the subgroups whose gene expression features were detailed in the main text, other subgroups identified through unsupervised clustering analysis were also bearing distinct expression profile. *BIRC7*, a gene associated with favorable prognosis in pediatric B-ALL,<sup>24</sup> was significantly upregulated in G3 with *ETV6-RUNX1* fusion. The alterations of *ETV6* and *UBA2* were more likely to be found in G3. All 9 patients with *ERG* deletions were clustered in G4, which was characterized by high expression of distinct outlier genes *PCDH17*, *PTPRM*, *AGAP1*, *IGF2* and *CLEC12B*. The dominant cooperating events of G4 was the alterations of *PAX5* (7/11, 63.6%), *NRAS* (5/11, 45.5%) and *IKZF1* (4/11, 36.4%). Most of the patients with hyperdiploidy (16/21, 76.2%) were clustered

in G6, which was also characterized by *NRAS/KRAS* mutations (8/21, 38.1%). G7 represented a relative heterogeneous group, including all patients with *MLL* fusions who had a pro-B phenotype with high expression of *MEIS1* and several *HOX* genes. G8 included all but one case of *BCR-ABL1* and all Philadelphia chromosome-like ALL that had frequent *IKZF1* alterations (28/40, 70%). As reported previously,<sup>25</sup> Philadelphia chromosome-like ALL patients had frequent translocations or mutations that activate kinase and cytokine receptor signaling, such as *JAK2*, *ABL1*, *CRLF2* (Table S18).

## References

- 1 Karolchik D, Hinrichs AS, Furey TS, et al. The UCSC Table Browser data retrieval tool. *Nucleic acids research*. 2004;**32**:D493-6.
- 2 Li H, Durbin R. Fast and accurate short read alignment with Burrows-Wheeler transform. *Bioinformatics*. 2009;**25**:1754-60.
- 3 Li H, Handsaker B, Wysoker A, et al. The Sequence Alignment/Map format and SAMtools. *Bioinformatics*. 2009;**25**:2078-9.
- 4 DePristo MA, Banks E, Poplin R, et al. A framework for variation discovery and genotyping using next-generation DNA sequencing data. *Nature genetics*. 2011;**43**:491-8.
- 5 Wang K, Li M, Hadley D, et al. PennCNV: an integrated hidden Markov model designed for high-resolution copy number variation detection in whole-genome SNP genotyping data. *Genome research*. 2007;**17**:1665-74.
- 6 Yau C, Mouradov D, Jorissen RN, et al. A statistical approach for detecting genomic aberrations in heterogeneous tumor samples from single nucleotide polymorphism genotyping data. *Genome biology*. 2010;**11**:R92.
- 7 Scharpf RB, Parmigiani G, Pevsner J, Ruczinski I. Hidden Markov models for the assessment of chromosomal alterations using high-throughput SNP arrays. *The annals of applied statistics*. 2008;**2**:687-713.
- 8 Baca SC, Prandi D, Lawrence MS, et al. Punctuated Evolution of Prostate Cancer Genomes. *Cell*. 2013;**153**:666-77.
- 9 McKenna A, Hanna M, Banks E, et al. The Genome Analysis Toolkit: a MapReduce framework for analyzing next-generation DNA sequencing data. *Genome research*. 2010;**20**:1297-303.
- 10 Ng SB, Turner EH, Robertson PD, et al. Targeted capture and massively parallel sequencing of 12 human exomes. *Nature*. 2009;**461**:272-6.
- 11 Ramos AH, Lichtenstein L, Gupta M, et al. Oncotator: cancer variant annotation tool. *Human mutation*. 2015;**36**:E2423-9.
- 12 Trapnell C, Pachter L, Salzberg SL. TopHat: discovering splice junctions with RNA-Seq. *Bioinformatics*. 2009;**25**:1105-11.
- 13 Kim D, Pertea G, Trapnell C, Pimentel H, Kelley R, Salzberg SL. TopHat2: accurate alignment of transcriptomes in the presence of insertions, deletions and gene fusions. *Genome biology*. 2013;**14**:R36.
- 14 Trapnell C, Williams BA, Pertea G, et al. Transcript assembly and quantification by RNA-Seq reveals unannotated transcripts and isoform switching during cell differentiation. *Nature biotechnology*. 2010;**28**:511-5.
- 15 Anders S, Pyl PT, Huber W. HTSeq--a Python framework to work with high-throughput sequencing data. *Bioinformatics*. 2015;**31**:166-9.
- 16 Love MI, Huber W, Anders S. Moderated estimation of fold change and dispersion for RNA-seq data with DESeq2. *Genome biology*. 2014;**15**:550.
- 17 Anders S, Huber W. Differential expression analysis for sequence count data. *Genome biology*. 2010;**11**:R106.
- 18 Nicorici D, Satalan M, Edgren H, et al. FusionCatcher-a tool for finding somatic fusion genes in paired-end RNA-sequencing data. *bioRxiv*. 2014:011650.
- 19 McPherson A, Hormozdiari F, Zayed A, et al. deFuse: an algorithm for gene fusion discovery in tumor RNA-Seq data. *PLoS computational biology*. 2011;**7**:e1001138.

- 20 Wang J, Mullighan CG, Easton J, et al. CREST maps somatic structural variation in cancer genomes with base-pair resolution. *Nature methods*. 2011;**8**:652-4.
- 21 Subramanian A, Tamayo P, Mootha VK, et al. Gene set enrichment analysis: a knowledge-based approach for interpreting genome-wide expression profiles. *Proceedings of the National Academy of Sciences of the United States of America*. 2005;**102**:15545-50.
- 22 Lawrence MS, Stojanov P, Polak P, et al. Mutational heterogeneity in cancer and the search for new cancer-associated genes. *Nature*. 2013;**499**:214-8.
- 23 Wang H, Lee CH, Qi C, et al. IRF8 regulates B-cell lineage specification, commitment, and differentiation. *Blood*. 2008;**112**:4028-38.
- 24 Ibrahim L, Aladle D, Mansour A, Hammad A, Al Wakeel AA, Abd El-Hameed SA. Expression and prognostic significance of livin/BIRC7 in childhood acute lymphoblastic leukemia. *Med Oncol*. 2014;**31**:941.
- 25 Roberts KG, Li Y, Payne-Turner D, et al. Targetable Kinase-Activating Lesions in Ph-like Acute Lymphoblastic Leukemia. *New Engl J Med*. 2014;**371**:1005-15.

## Supplementary Figures

Fig. S1 The protein domain plots (left panel) and Sanger sequencing (right panel) of gene fusions involving *MEF2D* (a) and *ZNF384* (b). (a) *MEF2D* fusion proteins retained the MADS box domain capable of binding DNA and the MEF2 specific type domain influencing DNA-binding affinity and cofactor interactions, yet lacking the TADII domain in C-terminal of *MEF2D*. (b) *ZNF384* related chimeric protein retained all of the functional domains of *ZNF384*.

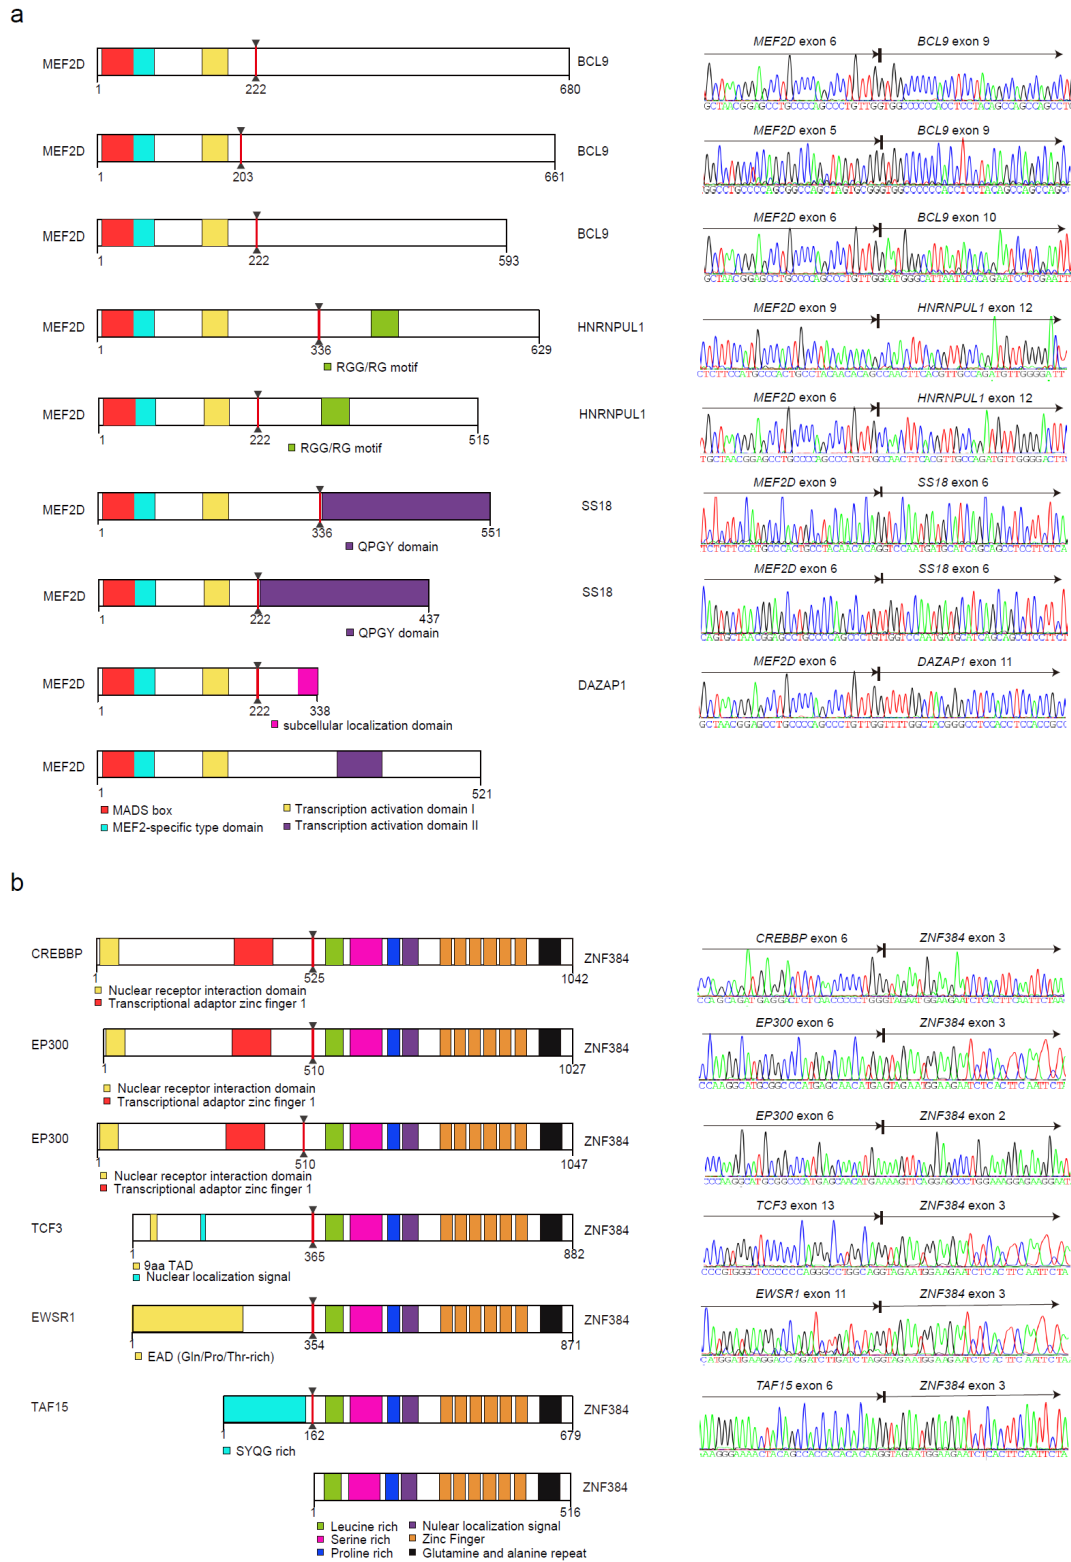

Fig. S2 Sublocalization of MEF2D, HNRNPUL1, MH, BCL9, MB, EP300, ZNF384 and EZ in NIH 3T3 cells. NIH3T3 cells were infected by different retroviruses encoding indicated proteins, and were stained with DAPI and antibody recognizing flag tagged proteins. Upper panels show nuclei as visualized by DAPI staining; middle panels, localization patterns of wild type or fusion proteins; bottom panels, the merged images.

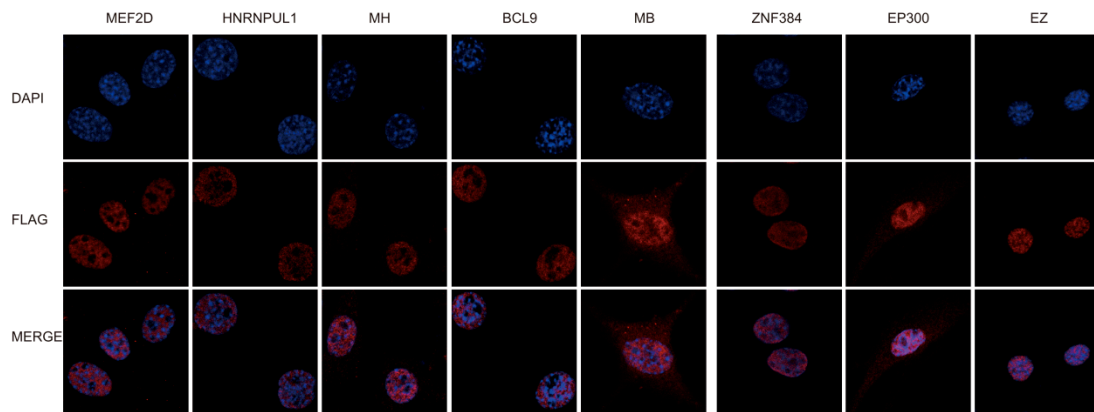

Fig. S3 (a) In vitro differentiation of Lin<sup>-</sup>c-Kit<sup>Low</sup> cells expressing wild type MEF2D or fusions. Sorted Lin<sup>-</sup>c-Kit<sup>Low</sup> BM cells were infected with retroviruses encoding wild type MEF2D or fusions or GFP only for 24 hours in the presence of SCF, Flt3L, IL-3, IL-6, IL-7 and 5µg/mL polybrene. These cells were plated onto OP9 monolayer and stimulated with SCF, IL-7, and Flt3L for 7 days. The cells were labeled with CD19 and Mac-1, and analyzed by flow cytometry. (b) *HDAC9* (left) and *RAG1* (right) mRNA levels in patients with *MEF2D* fusions and without *MEF2D* fusions as determined by RNA-seq.

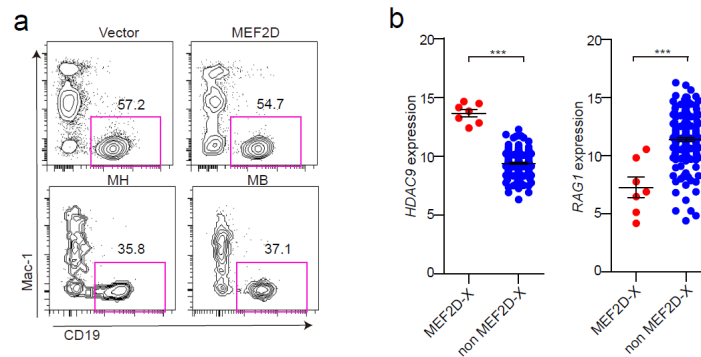

Fig. S4 (a) In vitro differentiation of Lin<sup>-</sup>c-Kit<sup>Low</sup> cells expressing wild type ZNF384 or EP300-ZNF384 fusion. (b) Comparison of peripheral blood parameters in control and morbid mice. (c) Gross change of spleen of EP300-ZNF384 mice, and spleen pathological section stained with hematoxylin-eosin (HE) of control and EP300-ZNF384 mice.

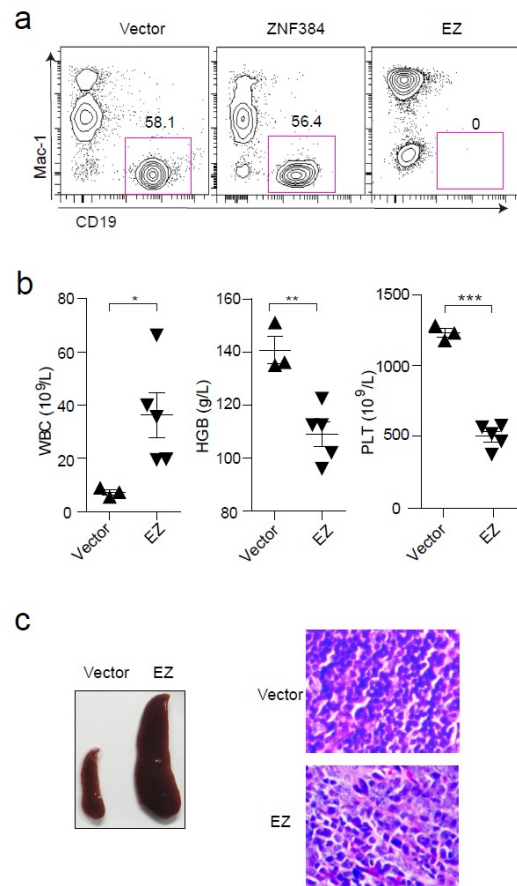



Fig. S5 (a) Heatmap of genes closely related to myeloid or lymphoid cell differentiation in different fusion groups. (b) GSEA of JAK-STAT signaling pathway in samples with or without *ZNF384* fusions (upper panel) and samples with or without *MEF2D* fusions (bottom panel).

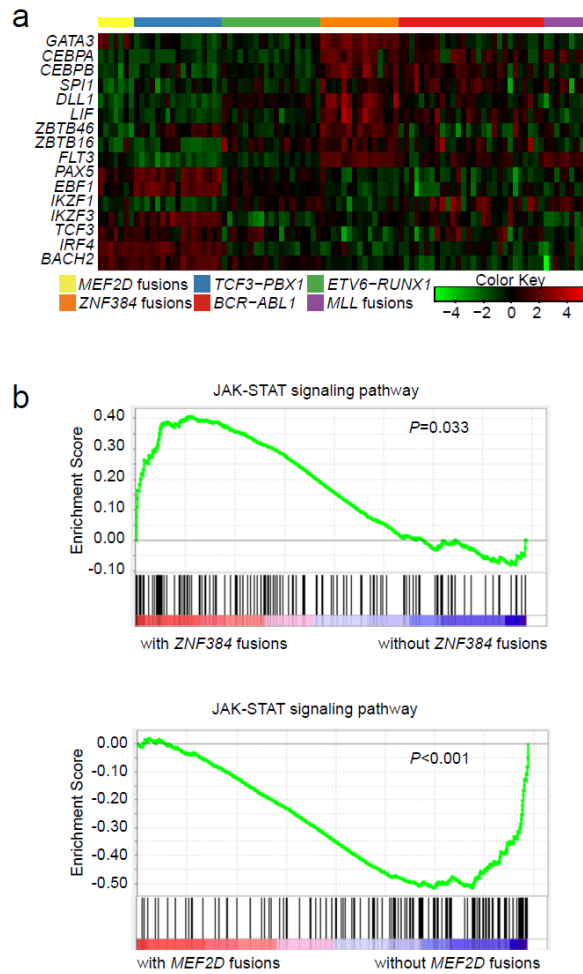

Fig.S6 Comparison of numbers of gene mutations in G1-G8. Each dot represents one sample. \* denotes there is a significant difference between adults and children.

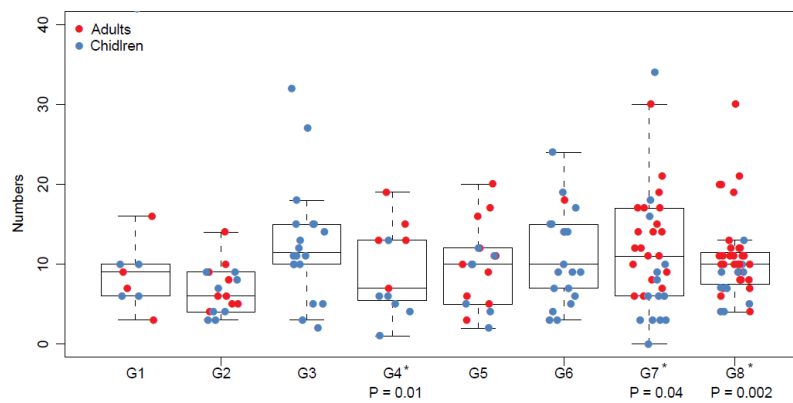

Fig. S7 Comparison of main functional categories of recurrent and crucial gene mutations in different groups between adults and children.

a

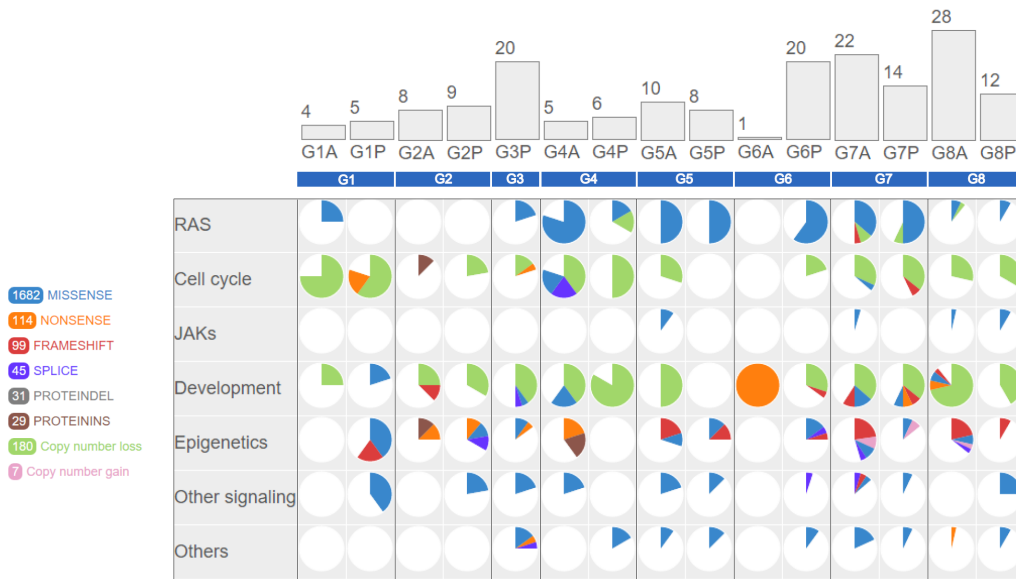

b

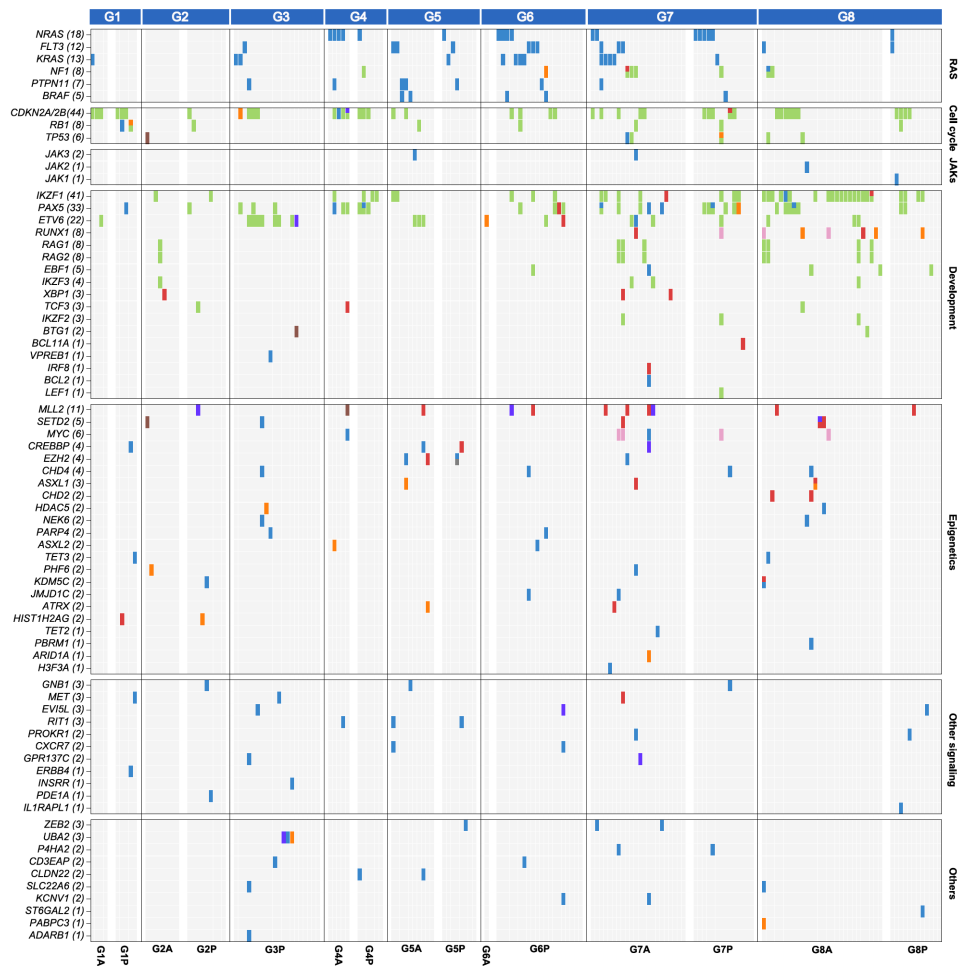

## Supplementary tables

**Table S1. Clinical and biological data of B-ALL patients in discovery cohort**

Abbreviations: CR, complete remission after two courses of induction therapy; CNV, copy number variation; NA, not available

\*Last follow up date: 2015/12/3

| Patient ID | Age (yrs) | Gender | WBC ( $\times 10^9/L$ ) | Karyotype                                   | CR (0=no, 1=yes) | Death* (0=no, 1=yes) | Relapse* (0=no, 1=yes) | CNV analysis (0=no, 1=yes) | RNA-seq (0=no, 1=yes) |
|------------|-----------|--------|-------------------------|---------------------------------------------|------------------|----------------------|------------------------|----------------------------|-----------------------|
| A01        | 58.2      | Female | 1.9                     | 46,XX                                       | 1                | 0                    | 0                      | 1                          | 0                     |
| A02        | 18.3      | Male   | 2.7                     | Fail                                        | 1                | 0                    | 1                      | 1                          | 0                     |
| A03        | 27.5      | Male   | 20.7                    | 46,XY                                       | 0                | 0                    | 1                      | 1                          | 1                     |
| A04        | 68.9      | Male   | 116.9                   | 46,XY                                       | 0                | 1                    | 1                      | 1                          | 1                     |
| A05        | 31.2      | Male   | 6.4                     | 46,XY                                       | 1                | 0                    | 0                      | 1                          | 1                     |
| A06        | 45.6      | Male   | 20.3                    | 46,XY                                       | 1                | 0                    | 1                      | 1                          | 0                     |
| A07        | 39.7      | Female | 31.5                    | 46,XX                                       | 0                | 1                    | NA                     | 1                          | 0                     |
| A08        | 49.5      | Male   | 7.1                     | NA                                          | 1                | 1                    | 1                      | 1                          | 1                     |
| A09        | 45.2      | Female | 2.7                     | 46,XX                                       | 1                | 0                    | 0                      | 1                          | 1                     |
| A10        | 44.8      | Female | 89.0                    | 46,XX,Ph[8]/46,XX[1]/[10]                   | 1                | 0                    | 0                      | 1                          | 1                     |
| A11        | 47.5      | Male   | 18.8                    | Fail                                        | 1                | 0                    | 1                      | 1                          | 0                     |
| A12        | 52.2      | Female | 35.6                    | 46,XX,Ph[4]/[6]                             | 1                | 1                    | 1                      | 1                          | 0                     |
| A13        | 26.5      | Male   | 39.4                    | 46,XY,Ph[4]/46,XY[2]/[6]                    | 1                | 1                    | 1                      | 1                          | 1                     |
| A14        | 35.8      | Male   | 25.7                    | Fail                                        | 0                | 1                    | 1                      | 1                          | 1                     |
| A15        | 21.6      | Female | 1.9                     | 46,XX,hyperdiploidy visible                 | 1                | 0                    | 1                      | 1                          | 1                     |
| A16        | 47.0      | Female | 66.8                    | 40~46,XX,der(19)t(1;19)[cp15]/46,XX[5]/[20] | 1                | 0                    | 0                      | 1                          | 1                     |
| A17        | 21.9      | Male   | 12.8                    | 42~46,XY,2q+,-4[cp4]/46,XY[4]/[8]           | 1                | 1                    | 1                      | 1                          | 1                     |
| A18        | 32.5      | Female | 273.3                   | Fail                                        | 1                | 1                    | 1                      | 1                          | 1                     |
| A19        | 36.3      | Male   | 6.4                     | Fail                                        | 1                | 1                    | 1                      | 1                          | 1                     |
| A20        | 44.3      | Male   | 46.4                    | 46,XY                                       | 1                | 0                    | 0                      | 1                          | 1                     |
| A21        | 46.8      | Male   | 47.9                    | Fail                                        | 1                | 0                    | 0                      | 1                          | 1                     |
| A22        | 49.2      | Female | 256.6                   | 43~46,XX,t(6;12),-20,2Ph[cp7]/[9]           | 1                | 1                    | 1                      | 1                          | 1                     |
| A23        | 26.7      | Male   | 61.3                    | 46,XY                                       | 1                | 1                    | 1                      | 1                          | 1                     |

|     |      |        |       |                                                                                |   |   |    |   |   |
|-----|------|--------|-------|--------------------------------------------------------------------------------|---|---|----|---|---|
| A24 | 23.7 | Male   | 6.3   | 46,XY                                                                          | 1 | 0 | 0  | 1 | 0 |
| A25 | 30.9 | Female | 24.6  | 46,XY                                                                          | 1 | 1 | 1  | 1 | 1 |
| A26 | 37.3 | Male   | 22.0  | 46,XY,der(19)t(1;19)                                                           | 1 | 1 | 1  | 1 | 1 |
| A27 | 19.3 | Female | 18.9  | 46,XX                                                                          | 1 | 1 | 1  | 1 | 1 |
| A28 | 64.3 | Female | 280.0 | Fail                                                                           | 0 | 1 | NA | 1 | 1 |
| A29 | 21.8 | Male   | 2.4   | 46,XY                                                                          | 1 | 1 | 1  | 1 | 0 |
| A30 | 31.4 | Male   | 62.7  | 45~47,XY,der(9),add(9p)t(9;22),Ph,+M[cp5]/45~47,XY,Ph,+M[cp5]/46,XY,Ph[1]/[11] | 1 | 0 | 0  | 1 | 1 |
| A31 | 18.2 | Male   | 70.0  | 46,XY,der(19)t(1;19)[5]/[5]                                                    | 1 | 0 | 0  | 1 | 1 |
| A32 | 51.0 | Female | 6.2   | NA                                                                             | 1 | 0 | 0  | 1 | 1 |
| A33 | 63.8 | Male   | 23.0  | 46,XY,1q+,22q-[6]/46,XY,1q+[3]/[10]                                            | 1 | 0 | 0  | 0 | 0 |
| A34 | 23.6 | Male   | 84.0  | 45~46,XY,Ph[cp2]/46,XY[2]/[5]                                                  | 1 | 1 | 1  | 1 | 1 |
| A35 | 18.6 | Male   | 4.3   | 46,XY[6]/[12], 6q- and M chromosome occasionally seen                          | 1 | 0 | 0  | 1 | 1 |
| A36 | 23.7 | Male   | 13.0  | 46,XY                                                                          | 1 | 0 | 0  | 1 | 1 |
| A37 | 22.8 | Female | 10.3  | 46-47,XX,+M[cp3][3]/46,XX[17]/[20]                                             | 1 | 0 | 0  | 1 | 1 |
| A38 | 27.8 | Female | 2.1   | Fail                                                                           | 1 | 0 | 1  | 1 | 1 |
| A39 | 18.3 | Female | 27.5  | 45~46,XX,der(19)t(1;19),+M[cp4]/46,XX[4]                                       | 1 | 1 | 1  | 1 | 1 |
| A40 | 34.2 | Female | 2.5   | 46,XX                                                                          | 1 | 0 | 0  | 1 | 1 |
| A41 | 59.1 | Female | 58.3  | 47-48,XX,-4,-6,+M1-M5[cp3]/[4]                                                 | 0 | 1 | NA | 1 | 1 |
| A42 | 53.4 | Female | 144.0 | 46,XX,t(4;11)[5]/[7]                                                           | 1 | 0 | 0  | 1 | 1 |
| A43 | 30.4 | Female | 3.8   | 46,XX                                                                          | 1 | 0 | 0  | 1 | 1 |
| A44 | 56.3 | Female | 27.5  | 46,XX[7]/[9]                                                                   | 0 | 1 | NA | 1 | 1 |
| A46 | 68.0 | Female | 112.7 | 46,XX[6]/[9]                                                                   | 0 | 1 | NA | 1 | 1 |
| A47 | 38.5 | Female | 56.6  | Fail                                                                           | 1 | 1 | 1  | 1 | 1 |
| A48 | 46.8 | Female | 154.5 | 46,XX                                                                          | 1 | 0 | 0  | 1 | 1 |
| A49 | 18.2 | Male   | 9.7   | 41-46,XY,1q-, -2, -7, 9q+, -13, -16, -17, -20, -22, +M1~M6[cp12]/46,XY[1]/[18] | 1 | 0 | 0  | 1 | 1 |
| A50 | 18.2 | Female | 39.5  | 45-46,XX,8p-,14q+,-19,+M1~M2[cp2]/46,XX[3]/[6]                                 | 1 | 0 | 0  | 1 | 1 |
| A51 | 27.3 | Male   | 37.8  | Fail                                                                           | 1 | 0 | 0  | 1 | 1 |
| A52 | 26.4 | Male   | 31.9  | 45,XY,-7,der(9)t(7;9)[9]/46,XY[5]/[22]                                         | 1 | 0 | 0  | 1 | 1 |
| A53 | 28.4 | Female | 6.4   | 46,XX                                                                          | 1 | 0 | 0  | 1 | 0 |
| A54 | 46.8 | Female | 3.3   | 46,XX                                                                          | 1 | 0 | 0  | 1 | 1 |
| A55 | 57.1 | Female | 3.8   | 48,XX,+13,-19,+21,+mar[cp4]/46,XX[16]/[20]                                     | 1 | 0 | 0  | 1 | 0 |
| A56 | 47.0 | Male   | 9.4   | 46,XY,t(9;9;9;22)[4];46,XY[4]/[10]                                             | 1 | 1 | 1  | 1 | 1 |
| A57 | 42.4 | Female | 135.4 | 44,XX,-11,-13,Ph[1]/46,XX[19]/[20]                                             | 1 | 1 | 1  | 1 | 1 |

|     |      |        |       |                                                                    |   |   |    |   |   |
|-----|------|--------|-------|--------------------------------------------------------------------|---|---|----|---|---|
| A58 | 25.3 | Male   | 18.0  | Fail                                                               | 1 | 0 | 0  | 1 | 1 |
| A59 | 29.2 | Male   | 214.3 | Fail                                                               | 1 | 0 | 0  | 1 | 1 |
| A60 | 31.3 | Female | 7.4   | 44-46,XX,-22,+M[cp6]/46,XX[1]/[9]                                  | 1 | 0 | 0  | 1 | 1 |
| A61 | 55.4 | Male   | 1.9   | 42-43,XY,3q+,Ph,+M1-M2[cp4]/46,XY,Ph[2]/46,XY[4]/[10]              | 1 | 0 | 1  | 1 | 1 |
| A62 | 51.1 | Male   | 62.4  | 42-46,XY,Ph[cp7]                                                   | 1 | 0 | 0  | 1 | 1 |
| A63 | 21.9 | Male   | 438.6 | 44-46,XY,Ph[cp3]                                                   | 1 | 0 | 0  | 1 | 1 |
| A64 | 27.0 | Male   | 28.3  | 44-45,XY,inv(11)?[cp2]/46,XY[18]/[31],occasionally der(9q),20q+,+M | 1 | 0 | 0  | 1 | 1 |
| A65 | 45.3 | Male   | 3.1   | 46,XY,Ph[3]/46,XY[6]/[11]                                          | 1 | 0 | 1  | 1 | 1 |
| A66 | 51.8 | Female | 92.9  | NA                                                                 | 0 | 0 | NA | 1 | 0 |
| A67 | 25.5 | Male   | 117.7 | 46,XY[5]                                                           | 1 | 0 | 0  | 1 | 0 |
| A68 | 40.8 | Female | 50.7  | NA                                                                 | 0 | 0 | NA | 1 | 0 |
| A70 | 19.9 | Female | 253.9 | 42-46,XX,t(4;11)[cp2]/46,XX[1]/[4]                                 | 1 | 1 | 1  | 1 | 1 |
| A71 | 18.4 | Female | 18.7  | 46,XX                                                              | 1 | 1 | 1  | 1 | 1 |
| A72 | 18.8 | Male   | 4.0   | NA                                                                 | 1 | 0 | 0  | 1 | 1 |
| A73 | 18.6 | Male   | 12.3  | NA                                                                 | 1 | 0 | 0  | 1 | 1 |
| A74 | 22.7 | Male   | 14.0  | 46,XY, t(1;19)(q23;p13)[10]                                        | 1 | 1 | 1  | 1 | 1 |
| A75 | 28.0 | Male   | 12.0  | NA                                                                 | 1 | 0 | 0  | 1 | 1 |
| A76 | 58.1 | Female | 13.1  | Fail                                                               | 1 | 0 | 0  | 1 | 1 |
| A77 | 59.9 | Male   | 99.1  | NA                                                                 | 0 | 0 | 0  | 1 | 1 |
| A78 | 36.9 | Female | 36.0  | 46,XX,+8,9p,-,20,Ph~2ph[cp17]/46,XX[1]/[19]                        | 1 | 0 | 0  | 1 | 1 |
| A79 | 46.2 | Male   | 5.9   | 45,XY,Ph[cp2]/46,XY[6]/[13]                                        | 1 | 0 | 0  | 1 | 1 |
| A81 | 36.7 | Female | 2.2   | 46,XX[12]/[20]                                                     | 1 | 0 | 1  | 1 | 1 |
| A82 | 18.1 | Male   | 30.4  | 46,XY                                                              | 1 | 0 | 0  | 1 | 1 |
| A83 | 18.2 | Male   | 78.0  | 46,XY[2]                                                           | 1 | 0 | 0  | 1 | 1 |
| A84 | 57.7 | Male   | 1.5   | 46,XY[2]/[3]                                                       | 1 | 0 | 0  | 1 | 1 |
| A85 | 18.4 | Male   | 76.5  | 41~46,XY,9p-[cp7]/45,X,-Y,9p-[4]/46,XY[2]/[15]                     | 1 | 0 | 0  | 1 | 1 |
| A86 | 24.8 | Female | 27.1  | 43~46,XX,12p+[cp4]/44~45,XX,6q-,12p+[cp3]/46,XX[5]/[18]            | 1 | 0 | 0  | 1 | 1 |
| A87 | 27.5 | Male   | 17.9  | 46,XY[6]/[9]                                                       | 1 | 0 | 0  | 1 | 1 |
| A88 | 28.3 | Female | 16.7  | 38~43,XX[cp8]/46,XX[10]/[20]                                       | 1 | 0 | 0  | 1 | 1 |
| A89 | 30.0 | Female | 108.2 | 46,XX[3]/[4]                                                       | 1 | 0 | 0  | 1 | 1 |
| A90 | 43.9 | Female | 66.1  | 43~46,XX,der(2)[cp4]/46,XX[6]/[10]                                 | 1 | 0 | 0  | 1 | 1 |
| A91 | 45.9 | Female | 25.4  | 46,XX[9]/[20],hyperdiploidy visible                                | 1 | 0 | 0  | 1 | 1 |
| A93 | 25.2 | Male   | 7.2   | 46,XX                                                              | 1 | 0 | 0  | 1 | 1 |

|      |      |        |       |                                                                         |   |   |   |   |   |
|------|------|--------|-------|-------------------------------------------------------------------------|---|---|---|---|---|
| A94  | 28.1 | Female | 20.1  | NA                                                                      | 1 | 1 | 1 | 1 | 1 |
| A95  | 57.7 | Female | 0.4   | 58~59,XX,-X,-1,-2,-3,-5,6q,-7,7q+,-11,-13,-14,-15,-18,-20[cp3]/46,XX[7] | 1 | 0 | 0 | 1 | 1 |
| A96  | 19.3 | Male   | 8.6   | NA                                                                      | 1 | 0 | 0 | 1 | 1 |
| AC04 | 16.1 | Female | 24.0  | 46,XX                                                                   | 1 | 0 | 0 | 1 | 0 |
| AC06 | 16.2 | Male   | 4.0   | 46,XY                                                                   | 1 | 0 | 0 | 1 | 1 |
| AC09 | 16.2 | Male   | 2.4   | Fail                                                                    | 1 | 1 | 1 | 1 | 0 |
| AC10 | 16.8 | Male   | 10.5  | 40~46,XY,-11,-15,+M1~M3[cp3]/46, XY[16]/[27]                            | 1 | 0 | 0 | 1 | 0 |
| AC11 | 16.4 | Male   | 69.3  | 46,XY,Ph                                                                | 1 | 0 | 1 | 1 | 1 |
| AC14 | 16.7 | Male   | 27.0  | NA                                                                      | 1 | 1 | 1 | 1 | 0 |
| AC16 | 15.6 | Male   | 2.4   | 46,XY                                                                   | 1 | 1 | 1 | 1 | 1 |
| B01  | 4.6  | Female | 158.0 | 46,XX                                                                   | 1 | 0 | 1 | 1 | 0 |
| B02  | 0.4  | Female | 386.8 | 46,XX,t(4;11)                                                           | 1 | 1 | 1 | 1 | 0 |
| B03  | 5.3  | Female | 508.8 | 46,XY,Ph                                                                | 1 | 1 | 1 | 1 | 1 |
| B04  | 4.6  | Male   | 15.5  | NA                                                                      | 1 | 0 | 1 | 1 | 0 |
| B06  | 6.8  | Male   | 2.9   | 46,XY                                                                   | 1 | 1 | 1 | 1 | 0 |
| B12  | 4.7  | Male   | 20.9  | 46,XY                                                                   | 1 | 1 | 1 | 1 | 1 |
| B13  | 9.2  | Male   | 55.6  | 46,XY,del(9)(q22)                                                       | 1 | 0 | 1 | 1 | 1 |
| B15  | 7.9  | Male   | 100.9 | NA                                                                      | 1 | 1 | 1 | 1 | 1 |
| B16  | 7.4  | Male   | 1.9   | 54-55,XY[cp2]                                                           | 1 | 1 | 1 | 1 | 1 |
| B17  | 3.6  | Male   | 57.1  | 46,XY                                                                   | 1 | 1 | 1 | 1 | 1 |
| B18  | 6.9  | Male   | 16.6  | 45,XY,Ph                                                                | 1 | 1 | 1 | 1 | 1 |
| C01  | 2.3  | Female | 104.0 | 46,XX                                                                   | 1 | 0 | 1 | 1 | 1 |
| C02  | 3.1  | Female | 15.4  | Fail, hyperdiploidy visible                                             | 1 | 0 | 0 | 1 | 0 |
| C03  | 11.6 | Male   | 1.9   | 46,XY                                                                   | 1 | 0 | 0 | 1 | 0 |
| C05  | 4.0  | Male   | 10.9  | 46,XY,hyperdiploidy visible                                             | 1 | 0 | 0 | 1 | 1 |
| C07  | 11.1 | Female | 71.5  | Fail                                                                    | 1 | 0 | 1 | 1 | 0 |
| C08  | 15.1 | Female | 6.8   | 46,XX                                                                   | 1 | 1 | 1 | 1 | 1 |
| C12  | 15.2 | Female | 13.5  | 54,XX,2Ph,+M1-M2[cp2]/45-46,XX,Ph,+M[cp3]/[5]                           | 1 | 1 | 1 | 1 | 0 |
| C13  | 15.4 | Female | 2.0   | 46,XX,hyperdiploidy visible                                             | 1 | 0 | 1 | 1 | 0 |
| C15  | 14.7 | Female | 10.8  | 46,XX                                                                   | 1 | 1 | 1 | 1 | 1 |
| C17  | 5.8  | Male   | 28.8  | 46,XY,hyperdiploidy visible                                             | 1 | 0 | 0 | 1 | 1 |
| C18  | 6.4  | Female | 25.3  | NA                                                                      | 1 | 0 | 0 | 1 | 1 |
| C19  | 7.6  | Female | 21.5  | 45,XX,i(7q)?,-22/46,XX,i(7q)?/46,XX                                     | 1 | 0 | 0 | 1 | 1 |

|     |      |        |       |                                                                                 |   |   |   |   |   |
|-----|------|--------|-------|---------------------------------------------------------------------------------|---|---|---|---|---|
| C20 | 2.9  | Female | 10.1  | 46,XX                                                                           | 1 | 0 | 0 | 1 | 1 |
| C21 | 8.9  | Female | 3.4   | NA                                                                              | 1 | 0 | 0 | 1 | 1 |
| C22 | 3.9  | Male   | 17.6  | 46,XY                                                                           | 1 | 0 | 0 | 1 | 1 |
| C23 | 13.0 | Female | 3.6   | 46,XX                                                                           | 1 | 0 | 0 | 1 | 1 |
| C24 | 11.4 | Male   | 2.7   | NA                                                                              | 1 | 0 | 0 | 1 | 1 |
| C25 | 3.2  | Male   | 16.3  | 46,XY                                                                           | 1 | 0 | 0 | 1 | 1 |
| C26 | 11.1 | Male   | 1.9   | 46,XY                                                                           | 1 | 0 | 0 | 1 | 1 |
| C27 | 1.0  | Female | 4.4   | NA                                                                              | 1 | 0 | 0 | 1 | 1 |
| C28 | 2.4  | Male   | 3.0   | NA                                                                              | 1 | 0 | 0 | 1 | 1 |
| C29 | 2.7  | Male   | 13.6  | Fail                                                                            | 1 | 0 | 0 | 1 | 1 |
| C30 | 12.9 | Male   | 10.3  | 44-46,X,-4,-5,-8,+M4~M5/46,XY                                                   | 1 | 0 | 0 | 1 | 1 |
| C31 | 5.2  | Male   | 8.3   | NA                                                                              | 1 | 0 | 0 | 1 | 1 |
| C32 | 13.8 | Female | 43.8  | 45~46,XX,der(1),-2,6q+,-8-19,+M3~M5                                             | 1 | 0 | 0 | 1 | 1 |
| C33 | 6.1  | Male   | 93.1  | NA                                                                              | 1 | 0 | 0 | 1 | 1 |
| C34 | 4.4  | Female | 6.8   | NA                                                                              | 1 | 0 | 0 | 1 | 1 |
| C35 | 5.6  | Male   | 66.5  | NA                                                                              | 1 | 0 | 0 | 1 | 1 |
| C36 | 3.7  | Male   | 84.0  | 44,XY,-7,-18,Ph/46,XY                                                           | 1 | 0 | 0 | 1 | 1 |
| C37 | 13.8 | Female | 64.8  | 46,XX,der(1)t(1;14)(q12;q12),-4,+M[6]/46,XX[6]                                  | 1 | 0 | 0 | 1 | 1 |
| C38 | 10.6 | Female | 8.3   | 46,XX                                                                           | 1 | 0 | 0 | 1 | 1 |
| C39 | 2.9  | Female | 7.6   | 46,XX                                                                           | 1 | 0 | 0 | 1 | 1 |
| C40 | 8.9  | Male   | 9.8   | 46,XY                                                                           | 1 | 0 | 0 | 1 | 1 |
| C41 | 14.9 | Female | 4.2   | 46,XX,t(1;9)[4]/46,XX[2]/[12]                                                   | 1 | 0 | 0 | 1 | 1 |
| C43 | 8.8  | Male   | 17.9  | 46,XY,t(10;16)(q11.2;q12)[15]/47,idem,+20[1]/46,XY[4]                           | 1 | 0 | 0 | 1 | 1 |
| C44 | 2.1  | Female | 4.3   | 56,XX,+dup(1)(q21q31),+4,+5,+7,+8,add(12)(p13),+14,+17,+18,+21,+21[2]/46,XX[18] | 1 | 0 | 0 | 1 | 1 |
| C45 | 2.2  | Female | 2.1   | 52,XX,+X,+6,+14,+17,+18,+21                                                     | 1 | 0 | 0 | 1 | 1 |
| C46 | 4.9  | Female | 7.4   | 47,XX,+X                                                                        | 1 | 0 | 0 | 1 | 0 |
| C47 | 4.1  | Male   | 96.0  | 46,XY                                                                           | 1 | 0 | 0 | 1 | 1 |
| C48 | 2.9  | Male   | 27.2  | 46,XY                                                                           | 1 | 0 | 0 | 1 | 1 |
| C49 | 13.6 | Male   | 205.6 | 46,XY,i(17)(q10)[5]/46,XY[15]                                                   | 0 | 0 | 0 | 1 | 1 |
| C51 | 3.2  | Male   | 5.4   | 46,XY                                                                           | 1 | 0 | 0 | 1 | 1 |
| C54 | 6.0  | Female | 5.7   | 46,XY                                                                           | 1 | 0 | 0 | 1 | 1 |
| C55 | 1.9  | Female | 9.4   | NA                                                                              | 1 | 0 | 0 | 1 | 1 |
| C56 | 4.3  | Male   | 2.3   | 55,XY,+X,+4,der(6)t(5;6)(q13;q21),+10,+14,+17,+18,+21,+21                       | 1 | 0 | 0 | 1 | 1 |

|     |      |        |       |                                                                                                                                  |   |   |   |   |   |
|-----|------|--------|-------|----------------------------------------------------------------------------------------------------------------------------------|---|---|---|---|---|
| C57 | 3.4  | Male   | 3.5   | 46,XY                                                                                                                            | 1 | 0 | 0 | 1 | 1 |
| C58 | 4.8  | Female | 0.9   | 46,XX,del(11)(q14q23)/46,XX                                                                                                      | 1 | 0 | 0 | 1 | 1 |
| C59 | 4.1  | Male   | 13.0  | 46,XY                                                                                                                            | 1 | 0 | 0 | 1 | 1 |
| C61 | 3.0  | Male   | 35.7  | 60,XY,+X,+4,der(5)t(1;5)q(23;q31),+6,+8,+10,+11,+12,+14,+15,+17,add(19)(p13.3),+21,+21,+22                                       | 1 | 0 | 0 | 1 | 1 |
| C63 | 1.1  | Male   | 244.3 | 46,XY,der(9)t(7;9)(q11.2;p13)                                                                                                    | 1 | 1 | 1 | 1 | 1 |
| C64 | 5.1  | Male   | 27.7  | NA                                                                                                                               | 1 | 0 | 0 | 1 | 1 |
| C65 | 3.7  | Female | 28.3  | 46,XX                                                                                                                            | 1 | 0 | 0 | 1 | 1 |
| C66 | 2.4  | Male   | 11.9  | 46,XY[8]                                                                                                                         | 1 | 0 | 0 | 1 | 1 |
| C67 | 9.9  | Male   | 506.5 | 46,XY,t(9;22)                                                                                                                    | 1 | 0 | 0 | 1 | 1 |
| C68 | 2.1  | Female | 3.3   | NA                                                                                                                               | 1 | 0 | 0 | 1 | 1 |
| C69 | 9.5  | Male   | 2.0   | 46,XY,del(6)(q13;q23)t(10;13)/46,idem,del(12)(p11.2)/46,XY                                                                       | 1 | 0 | 0 | 1 | 1 |
| C70 | 13.8 | Male   | 50.7  | 46,XY                                                                                                                            | 1 | 0 | 0 | 1 | 1 |
| C71 | 4.0  | Female | 1.5   | NA                                                                                                                               | 1 | 0 | 0 | 1 | 1 |
| C72 | 7.0  | Female | 8.0   | 53,XX,t(2;9)(p12;p21),+4+8,+8,+9,+14,+17,-20,-21,+21[12]                                                                         | 1 | 0 | 0 | 1 | 1 |
| C73 | 1.2  | Male   | 32.7  | 46,XY                                                                                                                            | 1 | 0 | 0 | 1 | 1 |
| C74 | 7.8  | Female | 2.6   | 54-56,XX,+X,+4,+6,+8,+10,+12,+14,+17,+18,+21[19],+21/46,XX[1]                                                                    | 1 | 0 | 1 | 1 | 1 |
| C75 | 2.2  | Female | 19.0  | 46,XX[8]                                                                                                                         | 1 | 0 | 0 | 1 | 1 |
| C76 | 8.1  | Female | 6.0   | NA                                                                                                                               | 1 | 0 | 1 | 1 | 1 |
| C77 | 13.6 | Male   | 2.8   | NA                                                                                                                               | 1 | 0 | 0 | 1 | 1 |
| C78 | 1.8  | Male   | 1.5   | 46,XY                                                                                                                            | 1 | 0 | 0 | 1 | 1 |
| C79 | 4.6  | Male   | 6.6   | 46,XY                                                                                                                            | 1 | 0 | 0 | 1 | 1 |
| C80 | 2.2  | Male   | 35.1  | 46,XY                                                                                                                            | 1 | 0 | 1 | 1 | 1 |
| C81 | 4.5  | Male   | 37.8  | 46,XY                                                                                                                            | 1 | 0 | 0 | 1 | 1 |
| C82 | 1.7  | Male   | 3.9   | 46,XY                                                                                                                            | 1 | 0 | 0 | 1 | 1 |
| C83 | 7.5  | Female | 12.2  | 46,XX                                                                                                                            | 1 | 0 | 0 | 1 | 1 |
| C84 | 4.2  | Male   | 163.8 | 47,XY,+X,t(4;11)(q21;q23)/47,idem,der(5)t(1;5)(p13;q35),der(15)t(1;15)(p13;p11.2),<br>i(17)(q10),der(18)t(1;18)(p13;p11.3)[lp13] | 1 | 0 | 1 | 1 | 1 |
| C85 | 0.6  | Female | 16.0  | 46,XX,t(11;19)(q23;p13)                                                                                                          | 1 | 0 | 0 | 1 | 1 |
| C86 | 3.5  | Male   | 9.4   | NA                                                                                                                               | 1 | 0 | 0 | 1 | 1 |
| C87 | 8.6  | Female | 8.7   | 47,XX,+1,t(1;19)(q23;p13.3)                                                                                                      | 1 | 0 | 0 | 1 | 1 |
| C88 | 11.1 | Male   | 336.0 | NA                                                                                                                               | 1 | 0 | 0 | 1 | 1 |
| C89 | 3.3  | Female | 17.3  | 59,XX,+X,+4,+der(5)t(1,5)(p12;q13),+6+del(8)(q22,q24),+10,+11,+12,+13,+17,+18,+21,+21[18]/46,XX[<br>2]                           | 1 | 0 | 0 | 1 | 1 |



|      |      |        |       |                                                                                                                                           |   |   |   |   |   |
|------|------|--------|-------|-------------------------------------------------------------------------------------------------------------------------------------------|---|---|---|---|---|
| C90  | 5.0  | Male   | 6.2   | 46,XY,inv(9)(p12,q13)[10]/49,idem,-Y,+8,+13,+20,+22[10]                                                                                   | 1 | 0 | 0 | 1 | 1 |
| C91  | 1.2  | Male   | 61.7  | 46,XY,der(19)t(1;19)(q23;p13.3)[5]/46,XY[15]                                                                                              | 1 | 0 | 0 | 1 | 1 |
| C92  | 5.8  | Male   | 3.4   | 44,XY,-3,-7,t(9;22)(q34;q11.2)t(p21;p13),der(20)t(3;20)(q21;q13.3)[9]/46,XY[8]                                                            | 1 | 0 | 0 | 1 | 0 |
| C93  | 4.9  | Female | 11.0  | 46,XX,+X,t(1;18)(q21;q11.2),del(9)(p22),der(9,10)(q10;q10)[15]/45,XX,t(1;18)(q21;q11.2),t(2;5)(q37;q13),der(9)(p22),der(9;11)(q10;q10)[5] | 1 | 0 | 0 | 1 | 1 |
| C94  | 3.0  | Female | 3.6   | 46,XX,t(12;22)(p13;q13),i(13)(q10)/46,XX                                                                                                  | 1 | 0 | 0 | 1 | 1 |
| C95  | 3.0  | Male   | 4.8   | 46,XY                                                                                                                                     | 1 | 0 | 0 | 1 | 1 |
| C96  | 12.2 | Male   | 1.1   | 46,XY                                                                                                                                     | 1 | 0 | 0 | 1 | 0 |
| C97  | 4.2  | Male   | 4.6   | 46,XY                                                                                                                                     | 1 | 0 | 0 | 1 | 1 |
| C98  | 6.4  | Female | 3.8   | 56,XX,+X,+4,+5,+6,del(q)(p22),+10,+14,+17,+18,+18,+21                                                                                     | 1 | 0 | 0 | 1 | 1 |
| C99  | 3.9  | Female | 6.5   | 46XX                                                                                                                                      | 1 | 0 | 0 | 1 | 0 |
| C100 | 2.8  | Male   | 17.7  | 58,XY,+X,+Y<+6,del(7)(q22),+10,+14,+14,+17,+18,+21,+21,+22[17]/46,XY                                                                      | 1 | 0 | 0 | 1 | 1 |
| C101 | 2.1  | Male   | 18.0  | 46,XY                                                                                                                                     | 1 | 0 | 0 | 1 | 1 |
| C102 | 2.8  | Male   | 5.6   | NA                                                                                                                                        | 1 | 0 | 0 | 1 | 1 |
| CA69 | 17.8 | Female | 103.8 | 46,XX[9]/[9]                                                                                                                              | 1 | 0 | 0 | 1 | 1 |
| CA80 | 17.5 | Female | 5.6   | 46,XX[13]/[20]                                                                                                                            | 1 | 0 | 0 | 1 | 1 |
| CA92 | 18.0 | Female | 3.8   | 46,XX                                                                                                                                     | 1 | 0 | 0 | 1 | 1 |
| CA97 | 17.6 | Female | 47.2  | 46,XY,4q-,5p+,-7,9p+,+M[2]/46,XY[14]/[17]                                                                                                 | 1 | 0 | 0 | 1 | 1 |

**Table S2. Somatic SNVs and indels identified by whole exome and genome sequencing**

\*Based on UCSC hg19 reference

| ID  | Chr | Start <sup>†</sup> | End <sup>†</sup> | Reference Allele     | Variant Allele | Depth | Variant | Gene          | RefSeq       | Mutation Type   | Amino Acid Change | PROV      | PROVEAN prediction | SIFT score | SIFT prediction | PolyPh    | PolyPhen prediction |
|-----|-----|--------------------|------------------|----------------------|----------------|-------|---------|---------------|--------------|-----------------|-------------------|-----------|--------------------|------------|-----------------|-----------|---------------------|
|     |     |                    |                  |                      |                |       | Allele  |               |              |                 |                   | Frequency |                    |            |                 | EAN score |                     |
| A01 | 13  | 111274575          | 111274575        | C                    | A              | 35    | 0.51    | <i>CARKD</i>  | NM_018210    | Missense        | p.A38E            | -1.65     | Neutral            | 0.64       | Tolerated       | 0.983     | probably damaging   |
| A01 | 7   | 50367240           | 50367256         | AAAGCCCC<br>CTGTAAGC | AGTGGG<br>G    | 33    | 0.21    | <i>IKZFI</i>  | NM_006060    | Frame_Shift_Del | p.E16fs           | NA        | NA                 | NA         | NA              | NA        | NA                  |
| A01 | 11  | 7022754            | 7022754          | C                    | A              | 107   | 0.47    | <i>ZNF214</i> | NM_013249    | Nonsense        | p.E54_            | NA        | NA                 | 0.79       | Tolerated       | NA        | NA                  |
| A01 | 22  | 30403117           | 30403117         | G                    | T              | 34    | 0.50    | <i>MTMR3</i>  | NM_021090    | Missense        | p.G229V           | -8.69     | Deleterious        | 0          | Damaging        | 1         | probably damaging   |
| A01 | 9   | 125645527          | 125645527        | T                    | C              | 139   | 0.51    | <i>RC3H2</i>  | NM_001100588 | Missense        | p.I239V           | -0.92     | Neutral            | 0.25       | Tolerated       | 0.65      | possibly damaging   |
| A01 | 11  | 47297481           | 47297481         | C                    | G              | 48    | 0.44    | <i>MADD</i>   | NM_003682    | Missense        | p.L231V           | -0.67     | Neutral            | 0.27       | Tolerated       | 0.999     | probably damaging   |

|     |    |           |           |     |     |     |      |                 |              |                 |              |        |             |      |           |       |                   |
|-----|----|-----------|-----------|-----|-----|-----|------|-----------------|--------------|-----------------|--------------|--------|-------------|------|-----------|-------|-------------------|
| A01 | 17 | 11556230  | 11556230  | C   | T   | 95  | 0.11 | <i>DNAH9</i>    | NM_001372    | Missense        | p.L836F      | -3.26  | Deleterious | 0.41 | Tolerated | 0.031 | benign            |
| A01 | 1  | 26695017  | 26695017  | T   | C   | 69  | 0.32 | <i>ZNF683</i>   | NM_001114759 | Missense        | p.M16V       | -0.49  | Neutral     | 0.06 | Tolerated | 0.004 | benign            |
| A01 | 10 | 5782047   | 5782047   | G   | C   | 154 | 0.49 | <i>FAM208B</i>  | NM_017782    | Missense        | p.M638I      | -0.06  | Neutral     | 0.33 | Tolerated | 0     | benign            |
| A01 | X  | 125686271 | 125686271 | G   | T   | 16  | 0.81 | <i>DCAF12L1</i> | NM_178470    | Missense        | p.N107K      | -3.41  | Deleterious | 0.02 | Damaging  | 0.999 | probably damaging |
| A01 | 5  | 149008390 | 149008390 | C   | T   | 11  | 0.55 | <i>ARHGEF37</i> | NM_001001669 | Missense        | p.P560L      | -1.1   | Neutral     | 0.07 | Tolerated | 0.999 | probably damaging |
| A01 | 9  | 37015165  | 37015165  | G   | C   | 102 | 0.44 | <i>PAX5</i>     | NM_016734    | Missense        | p.P80R       | -7.7   | Deleterious | 0    | Damaging  | 1     | probably damaging |
| A01 | 2  | 136872498 | 136872498 | G   | A   | 38  | 0.47 | <i>CXCR4</i>    | NM_001008540 | Nonsense        | p.R338_      | NA     | NA          | 1    | Tolerated | NA    | NA                |
| A01 | 2  | 128339485 | 128339485 | G   | A   | 35  | 0.46 | <i>MYO7B</i>    | NM_001080527 | Missense        | p.R367Q      | 0.35   | Neutral     | 0.59 | Tolerated | 0.001 | benign            |
| A01 | 20 | 45000481  | 45000481  | C   | A   | 36  | 0.47 | <i>ELMO2</i>    | NM_133171    | Missense        | p.R515M      | -4.44  | Deleterious | 0    | Damaging  | 0.974 | probably damaging |
| A01 | 2  | 187626804 | 187626804 | C   | T   | 74  | 0.50 | <i>FAM171B</i>  | NM_177454    | Nonsense        | p.R579_      | NA     | NA          | 0.63 | Tolerated | NA    | NA                |
|     |    |           |           |     |     |     |      | TGAAAGAAAA      |              |                 |              |        |             |      |           |       |                   |
|     |    |           |           |     |     |     |      | ATGCAAACCT      |              |                 |              |        |             |      |           |       |                   |
| A01 | 3  | 47139423  | 47139457  |     | TAG | 40  | 0.13 | <i>SETD2</i>    | NM_014159    | Splice Site     | p.KKDSV171   | NA     | NA          | NA   | NA        | NA    | NA                |
|     |    |           |           |     |     |     |      | ACTGAATCC       |              |                 | lsp          |        |             |      |           |       |                   |
|     |    |           |           |     |     |     |      | TTCTTA          |              |                 |              |        |             |      |           |       |                   |
| A01 | 12 | 56351752  | 56351752  | T   | C   | 45  | 0.40 | <i>PMEL</i>     | NM_001200054 | Missense        | p.S196G      | -2.13  | Neutral     | 0.08 | Tolerated | 0.991 | probably damaging |
| A01 | 1  | 92445139  | 92445139  | C   | T   | 104 | 0.09 | <i>BRDT</i>     | NM_001242806 | Missense        | p.T375M      | 3.68   | Neutral     | 1    | Tolerated | 0.016 | benign            |
| A01 | 17 | 29553477  | 29553477  | A   | AC  | 46  | 0.72 | <i>NF1</i>      | NM_001042492 | Frame_Shift_Ins | p.T676fs     | NA     | NA          | NA   | NA        | NA    | NA                |
| A01 | 7  | 141618947 | 141618947 | C   | A   | 102 | 0.45 | <i>OR9A4</i>    | NM_001001656 | Missense        | p.T91K       | -3.28  | Deleterious | 0    | Damaging  | 0.608 | possibly damaging |
| A01 | 1  | 156828334 | 156828334 | A   | G   | 40  | 0.48 | <i>INSRR</i>    | NM_014215    | Missense        | p.V27A       | 0.82   | Neutral     | 1    | Tolerated | 0.001 | benign            |
| A01 | 15 | 51692425  | 51692425  | T   | C   | 97  | 0.43 | <i>GLDN</i>     | NM_181789    | Missense        | p.V285A      | -0.96  | Neutral     | 0.31 | Tolerated | 0.002 | benign            |
| A01 | 6  | 51750732  | 51750732  | C   | A   | 46  | 0.28 | <i>PKHD1</i>    | NM_138694    | Missense        | p.W2383L     | -2.41  | Neutral     | 0.65 | Tolerated | 0.92  | possibly damaging |
|     |    |           |           |     |     |     |      | GGTCTCATTC      |              |                 |              |        |             |      |           |       |                   |
| A02 | 12 | 59266341  | 59266359  |     | G   | 74  | 0.23 | <i>LRIG3</i>    | NM_153377    | In_Frame_Del    | p.1119_1120T | NA     | NA          | NA   | NA        | NA    | NA                |
|     |    |           |           |     |     |     |      | AGTCTATGT       |              |                 | *>fs         |        |             |      |           |       |                   |
|     |    |           |           |     |     |     |      | ACTGACT         |              |                 |              |        |             |      |           |       |                   |
| A02 | 13 | 32735372  | 32735374  | ATT |     | 78  | 0.31 | <i>FRY</i>      | NM_023037    | In_Frame_Ins    | p.626_626l>T | -10.26 | Deleterious | NA   | NA        | NA    | NA                |
|     |    |           |           |     |     |     |      | TACTG           |              |                 | DLL          |        |             |      |           |       |                   |
| A02 | 5  | 63256808  | 63256808  | C   | T   | 53  | 0.13 | <i>HTR1A</i>    | NM_000524    | Missense        | p.A247T      | -0.53  | Neutral     | 0.57 | Tolerated | 0.929 | possibly damaging |
| A02 | 16 | 77353946  | 77353946  | C   | T   | 33  | 0.24 | <i>ADAMTS18</i> | NM_199355    | Missense        | p.E778K      | -0.31  | Neutral     | 0.25 | Tolerated | 0.615 | possibly damaging |
| A02 | X  | 142596912 | 142596912 | A   | C   | 101 | 0.41 | <i>SPANXN3</i>  | NM_001009609 | Missense        | p.F53C       | -1.16  | Neutral     | 0    | Damaging  | 0.958 | probably damaging |
| A02 | 4  | 156832655 | 156832655 | C   | A   | 77  | 0.44 | <i>TDO2</i>     | NM_005651    | Missense        | p.L209M      | -1.84  | Neutral     | 0    | Damaging  | 1     | probably damaging |
| A02 | 9  | 113169575 | 113169575 | G   | A   | 133 | 0.30 | <i>SVEP1</i>    | NM_153366    | Missense        | p.R2769C     | -1.92  | Neutral     | 0.05 | Damaging  | 0.996 | probably damaging |
| A02 | 15 | 66610820  | 66610820  | G   | A   | 124 | 0.24 | <i>DIS3L</i>    | NM_001143688 | Missense        | p.R343Q      | -3.49  | Deleterious | 0.05 | Damaging  | 0.865 | possibly damaging |
| A02 | 15 | 71704085  | 71704085  | C   | T   | 59  | 0.24 | <i>THSD4</i>    | NM_024817    | Missense        | p.R359W      | -4.8   | Deleterious | 0    | Damaging  | 1     | probably damaging |
| A02 | 3  | 143708571 | 143708571 | G   | A   | 68  | 0.35 | <i>C3orf58</i>  | NM_173552    | Missense        | p.R394Q      | 0.07   | Neutral     | 0.63 | Tolerated | 0.048 | benign            |

|     |    |           |           |       |              |     |      |                   |              |                 |                         |       |             |      |           |       |                   |
|-----|----|-----------|-----------|-------|--------------|-----|------|-------------------|--------------|-----------------|-------------------------|-------|-------------|------|-----------|-------|-------------------|
| A02 | 20 | 13251265  | 13251265  | C     | T            | 100 | 0.58 | <i>ISM1</i>       | NM_080826    | Nonsense        | p.R85_                  | NA    | NA          | 1    | Tolerated | NA    | NA                |
| A02 | 2  | 230668294 | 230668296 | TCT   | TTTAGGT<br>G | 66  | 0.18 | <i>TRIP12</i>     | NM_004238    | Frame_Shift_Ins | p.R922fs                | NA    | NA          | NA   | NA        | NA    | NA                |
| A02 | 17 | 44061281  | 44061281  | G     | A            | 47  | 0.38 | <i>MAPT</i>       | NM_001123066 | Missense        | p.V371I                 | -0.25 | Neutral     | 0.17 | Tolerated | 0.307 | benign            |
| A03 | 6  | 161152819 | 161152819 | C     | T            | 50  | 0.36 | <i>PLG</i>        | NM_000301    | Missense        | p.A494V                 | -2.38 | Neutral     | 0.01 | Damaging  | 0.992 | probably damaging |
| A03 | 9  | 37354767  | 37354767  | G     | A            | 460 | 0.26 | <i>ZCCHC7</i>     | NM_032226    | Missense        | p.D382N                 | -3    | Deleterious | 0.03 | Damaging  | 1     | probably damaging |
| A03 | 1  | 32790094  | 32790094  | G     | A            | 89  | 0.37 | <i>HDAC1</i>      | NM_004964    | Missense        | p.D99N                  | -4.61 | Deleterious | 0    | Damaging  | 1     | probably damaging |
| A03 | 12 | 123333031 | 123333031 | A     | G            | 13  | 0.54 | <i>HIP1R</i>      | NM_003959    | Missense        | p.H59R                  | -5.23 | Deleterious | 0.31 | Tolerated | 0.994 | probably damaging |
| A03 | 22 | 41735867  | 41735868  | GC    | CT           | 24  | 0.25 | <i>ZC3H7B</i>     | NM_017590    | Missense        | p.L288_P289d<br>elinsFS | -3.77 | Deleterious | NA   | NA        | NA    | NA                |
| A03 | 8  | 87470234  | 87470234  | C     | A            | 50  | 0.50 | <i>WWP1</i>       | NM_007013    | Missense        | p.Q827K                 | -3.59 | Deleterious | 0.06 | Tolerated | 1     | probably damaging |
| A03 | 8  | 30701172  | 30701172  | G     | A            | 78  | 0.53 | <i>TEX15</i>      | NM_031271    | Nonsense        | p.R1788_                | NA    | NA          | 0    | Damaging  | NA    | NA                |
| A03 | 5  | 13717533  | 13717533  | C     | T            | 14  | 0.43 | <i>DNAH5</i>      | NM_001369    | Missense        | p.R4199H                | -4.79 | Deleterious | 0    | Damaging  | 1     | probably damaging |
| A03 | 10 | 86008679  | 86008679  | C     | T            | 16  | 0.50 | <i>RGR</i>        | NM_002921    | Missense        | p.R84C                  | -1.98 | Neutral     | 0.01 | Damaging  | 0.999 | probably damaging |
| A03 | 4  | 76811189  | 76811189  | C     | G            | 51  | 0.59 | <i>PPEF2</i>      | NM_006239    | Missense        | p.S113T                 | -1.4  | Neutral     | 0.19 | Tolerated | 0.004 | benign            |
| A03 | 16 | 705126    | 705126    | T     | A            | 12  | 0.42 | <i>WDR90</i>      | NM_145294    | Missense        | p.V512D                 | -5.78 | Deleterious | 0.01 | Damaging  | 0.993 | probably damaging |
| A04 | 20 | 33876701  | 33876701  | C     | T            | 15  | 0.60 | <i>FAM83C</i>     | NM_178468    | Missense        | p.A192T                 | -3.82 | Deleterious | 0.01 | Damaging  | 0.281 | benign            |
| A04 | 2  | 160714908 | 160714908 | T     | C            | 114 | 0.49 | <i>LY75-CD302</i> | NM_001198759 | Missense        | p.D783G                 | -3.58 | Deleterious | 0.15 | Tolerated | 1     | probably damaging |
| A04 | 12 | 25398285  | 25398285  | C     | T            | 14  | 0.29 | <i>KRAS</i>       | NM_033360    | Missense        | p.G12S                  | -4.44 | Deleterious | 0.01 | Damaging  | 0.682 | possibly damaging |
| A04 | 12 | 50571079  | 50571079  | C     | T            | 163 | 0.55 | <i>LIMA1</i>      | NM_001113546 | Missense        | p.G684D                 | -2.09 | Neutral     | 0.01 | Damaging  | 1     | probably damaging |
| A04 | 1  | 226252135 | 226252135 | A     | T            | 29  | 0.55 | <i>H3F3A</i>      | NM_002107    | Missense        | p.K28M                  | -5.39 | Deleterious | 0    | Damaging  | 1     | probably damaging |
| A04 | 1  | 55607394  | 55607394  | G     | C            | 51  | 0.61 | <i>USP24</i>      | NM_015306    | Nonsense        | p.S882_                 | NA    | NA          | 0.25 | Tolerated | NA    | NA                |
| A04 | 11 | 124252956 | 124252956 | A     | C            | 109 | 0.43 | <i>OR8B2</i>      | NM_001005468 | Missense        | p.V95G                  | -1.18 | Neutral     | 0.25 | Tolerated | 0.02  | benign            |
| A05 | 2  | 68882419  | 68882419  | C     | T            | 19  | 0.47 | <i>PROKR1</i>     | NM_138964    | Missense        | p.A298V                 | -2.31 | Neutral     | 0.02 | Damaging  | 0.991 | probably damaging |
| A05 | X  | 133551277 | 133551277 | T     | C            | 47  | 0.96 | <i>PHF6</i>       | NM_001015877 | Missense        | p.C305R                 | -2.93 | Deleterious | 0    | Damaging  | 0.997 | probably damaging |
| A05 | 12 | 12037382  | 12037382  | G     | A            | 69  | 0.42 | <i>ETV6</i>       | NM_001987    | Missense        | p.C338Y                 | -8.44 | Deleterious | 1    | Tolerated | 1     | probably damaging |
| A05 | 16 | 10721631  | 10721631  | C     | T            | 7   | 0.57 | <i>TEKT5</i>      | NM_144674    | Missense        | p.D423N                 | -1    | Neutral     | 0.44 | Tolerated | 0.001 | benign            |
| A05 | 20 | 50307291  | 50307291  | C     | T            | 75  | 0.39 | <i>ATP9A</i>      | NM_006045    | Missense        | p.G237E                 | -6.9  | Deleterious | 0    | Damaging  | 1     | probably damaging |
| A05 | 1  | 183091387 | 183091387 | G     | C            | 41  | 0.44 | <i>LAMC1</i>      | NM_002293    | Splice Site     | p.G801sp                | NA    | NA          | NA   | NA        | NA    | NA                |
| A05 | 5  | 133473786 | 133473790 | CTCTC | CCAGACT      | 23  | 0.43 | <i>TCF7</i>       | NM_003202    | Frame_Shift_Ins | p.L160fs                | NA    | NA          | NA   | NA        | NA    | NA                |
| A05 | 1  | 111146528 | 111146528 | G     | A            | 50  | 0.52 | <i>KCNA2</i>      | NM_004974    | Missense        | p.L293F                 | -3.84 | Deleterious | 0.12 | Tolerated | 1     | probably damaging |
| A05 | 20 | 31022808  | 31022808  | C     | CT           | 27  | 0.37 | <i>ASXL1</i>      | NM_015338    | Frame_Shift_Ins | p.L765fs                | NA    | NA          | NA   | NA        | NA    | NA                |
| A05 | 10 | 78708903  | 78708903  | C     | A            | 83  | 0.31 | <i>KCNMA1</i>     | NM_001161352 | Missense        | p.L902F                 | -3.84 | Deleterious | 0.04 | Damaging  | 1     | probably damaging |

|     |    |           |           |         |        |     |      |                 |              |                 |           |       |             |      |           |       |                   |
|-----|----|-----------|-----------|---------|--------|-----|------|-----------------|--------------|-----------------|-----------|-------|-------------|------|-----------|-------|-------------------|
| A05 | 19 | 17949108  | 17949108  | C       | G      | 51  | 0.41 | <i>JAK3</i>     | NM_000215    | Missense        | p.M511I   | -1.54 | Neutral     | 0.12 | Tolerated | 0.187 | benign            |
| A05 | 1  | 116275550 | 116275556 | ATGTAAG | AAGTAA | 58  | 0.12 | <i>CASQ2</i>    | NM_001232    | Frame_Shift_Del | p.P191fs  | NA    | NA          | NA   | NA        | NA    | NA                |
| A05 | 13 | 23905183  | 23905183  | G       | A      | 77  | 0.51 | <i>SACS</i>     | NM_014363    | Missense        | p.P4278S  | -1.15 | Neutral     | 0.13 | Tolerated | 0.013 | benign            |
| A05 | 1  | 181765825 | 181765825 | G       | A      | 30  | 0.47 | <i>CACNA1E</i>  | NM_001205293 | Missense        | p.R2077H  | -1.4  | Neutral     | 0.11 | Tolerated | 0.999 | probably damaging |
| A05 | 21 | 36252939  | 36252940  | CG      | CTC    | 34  | 0.38 | <i>RUNX1</i>    | NM_001001890 | Frame_Shift_Ins | p.S114fs  | NA    | NA          | NA   | NA        | NA    | NA                |
| A05 | 16 | 67654675  | 67654675  | A       | C      | 55  | 0.38 | <i>CTCF</i>     | NM_006565    | Missense        | p.S388R   | -4.62 | Deleterious | 0.03 | Damaging  | 0.997 | probably damaging |
| A05 | 5  | 108168508 | 108168508 | G       | A      | 69  | 0.51 | <i>FER</i>      | NM_005246    | Missense        | p.S82N    | -1.99 | Neutral     | 0    | Damaging  | 0.98  | probably damaging |
| A06 | 11 | 5173374   | 5173374   | C       | A      | 50  | 0.18 | <i>OR52A1</i>   | NM_012375    | Missense        | p.A76S    | 1.27  | Neutral     | 1    | Tolerated | 0.001 | benign            |
| A06 | 2  | 99766961  | 99766963  | AAC     | A      | 41  | 0.37 | <i>C2orf15</i>  | NM_144706    | Frame_Shift_Del | p.E14fs   | NA    | NA          | NA   | NA        | NA    | NA                |
| A06 | 12 | 49428410  | 49428410  | T       | TC     | 37  | 0.16 | <i>MLL2</i>     | NM_003482    | Frame_Shift_Ins | p.G3465fs | NA    | NA          | NA   | NA        | NA    | NA                |
| A06 | 5  | 78586992  | 78586992  | G       | A      | 77  | 0.45 | <i>JMY</i>      | NM_152405    | Missense        | p.G466D   | -6.41 | Deleterious | 0    | Damaging  | 1     | probably damaging |
| A06 | 5  | 177569646 | 177569646 | A       | G      | 46  | 0.50 | <i>RMND5B</i>   | NM_022762    | Missense        | p.I68V    | 0.02  | Neutral     | 0.33 | Tolerated | 0.088 | benign            |
| A06 | 14 | 24785002  | 24785002  | A       | T      | 38  | 0.61 | <i>LTB4R</i>    | NM_001143919 | Nonsense        | p.K49_    | NA    | NA          | 0.15 | Tolerated | NA    | NA                |
| A06 | 17 | 36484361  | 36484361  | C       | A      | 58  | 0.57 | <i>GPR179</i>   | NM_001004334 | Missense        | p.L1697F  | -1.2  | Neutral     | 0.09 | Tolerated | 0.943 | possibly damaging |
| A06 | 10 | 105883870 | 105883870 | G       | A      | 85  | 0.33 | <i>SFR1</i>     | NM_001002759 | Missense        | p.M178I   | -2.81 | Deleterious | 0.03 | Damaging  | 0.995 | probably damaging |
| A06 | 2  | 183066266 | 183066267 | AT      | A      | 66  | 0.48 | <i>PDE1A</i>    | NM_001003683 | Frame_Shift_Del | p.M358fs  | NA    | NA          | NA   | NA        | NA    | NA                |
| A06 | 1  | 161011135 | 161011135 | G       | T      | 29  | 0.34 | <i>USF1</i>     | NM_001276373 | Missense        | p.P180H   | -7.43 | Deleterious | 0    | Damaging  | 1     | probably damaging |
| A06 | 3  | 9743572   | 9743572   | C       | G      | 20  | 0.40 | <i>MTMR14</i>   | NM_001077525 | Missense        | p.P623R   | -1.78 | Neutral     | 0.04 | Damaging  | 0.974 | probably damaging |
| A06 | 16 | 3807360   | 3807360   | C       | CTGTG  | 31  | 0.26 | <i>CREBBP</i>   | NM_004380    | Frame_Shift_Ins | p.Q1209fs | NA    | NA          | NA   | NA        | NA    | NA                |
| A06 | X  | 29935692  | 29935692  | G       | A      | 101 | 0.10 | <i>IL1RAPL1</i> | NM_014271    | Missense        | p.R297Q   | -0.77 | Neutral     | NA   | NA        | 0.995 | probably damaging |
| A06 | 5  | 149006813 | 149006813 | C       | T      | 27  | 0.56 | <i>ARHGEF37</i> | NM_001001669 | Missense        | p.R547C   | -7.32 | Deleterious | 0    | Damaging  | 0.999 | probably damaging |
| A06 | 1  | 234565893 | 234565893 | G       | A      | 84  | 0.44 | <i>TARBP1</i>   | NM_005646    | Missense        | p.T850M   | -0.2  | Neutral     | 0.11 | Tolerated | 0.096 | benign            |
| A07 | 12 | 100042290 | 100042290 | A       | G      | 61  | 0.31 | <i>FAM71C</i>   | NM_153364    | Missense        | p.E113G   | -2.95 | Deleterious | NA   | NA        | 0.166 | benign            |
| A07 | X  | 115304404 | 115304404 | G       | A      | 135 | 0.47 | <i>AGTR2</i>    | NM_000686    | Missense        | p.E291K   | 0.25  | Neutral     | 0.45 | Tolerated | 0.128 | benign            |
| A07 | 8  | 72984020  | 72984020  | A       | G      | 82  | 0.29 | <i>TRPA1</i>    | NM_007332    | Missense        | p.F65S    | 3.2   | Neutral     | 0.25 | Tolerated | 0     | benign            |
| A07 | 16 | 15718946  | 15718946  | C       | T      | 81  | 0.38 | <i>KIAA0430</i> | NM_014647    | Missense        | p.G680S   | 0.84  | Neutral     | 0.74 | Tolerated | 0     | benign            |
| A07 | 1  | 82433771  | 82433771  | G       | A      | 109 | 0.33 | <i>LPHN2</i>    | NM_012302    | Missense        | p.G787E   | -7.18 | Deleterious | 0    | Damaging  | 1     | probably damaging |
| A07 | X  | 32490307  | 32490307  | T       | A      | 156 | 0.31 | <i>DMD</i>      | NM_004006    | Missense        | p.M975L   | -1.18 | Neutral     | 0.29 | Tolerated | 0.963 | probably damaging |
| A07 | 12 | 49432738  | 49432738  | G       | A      | 39  | 0.15 | <i>MLL2</i>     | NM_003482    | Nonsense        | p.R2801_  | NA    | NA          | 0    | Damaging  | NA    | NA                |
| A07 | 2  | 74763475  | 74763475  | G       | A      | 26  | 0.54 | <i>LOXL3</i>    | NM_032603    | Missense        | p.R346W   | -6.85 | Deleterious | 0    | Damaging  | 1     | probably damaging |
| A07 | 7  | 151716786 | 151716786 | G       | A      | 96  | 0.48 | <i>GALNTL5</i>  | NM_145292    | Missense        | p.R411H   | -0.08 | Neutral     | 0.04 | Damaging  | 0     | benign            |
| A07 | 14 | 62547891  | 62547891  | C       | T      | 56  | 0.38 | <i>SYT16</i>    | NM_031914    | Nonsense        | p.R445_   | NA    | NA          | 1    | Tolerated | NA    | NA                |
| A07 | 3  | 179472610 | 179472610 | G       | GC     | 89  | 0.27 | <i>USP13</i>    | NM_003940    | Frame_Shift_Ins | p.S630fs  | NA    | NA          | NA   | NA        | NA    | NA                |

|     |    |           |           |    |      |     |      |                 |              |                 |           |       |             |      |           |       |                   |
|-----|----|-----------|-----------|----|------|-----|------|-----------------|--------------|-----------------|-----------|-------|-------------|------|-----------|-------|-------------------|
| A07 | 17 | 29557344  | 29557345  | TG | TCCC | 124 | 0.56 | <i>NF1</i>      | NM_001042492 | Frame_Shift_Ins | p.V1019fs | NA    | NA          | NA   | NA        | NA    | NA                |
| A08 | 3  | 175473064 | 175473064 | G  | A    | 104 | 0.13 | <i>NAALADL2</i> | NM_207015    | Missense        | p.A683T   | -0.46 | Neutral     | 0.04 | Damaging  | 0.062 | benign            |
| A08 | 17 | 39135207  | 39135207  | A  | G    | 38  | 0.13 | <i>KRT40</i>    | NM_182497    | Missense        | p.C349R   | -4.15 | Deleterious | 0.36 | Tolerated | 0.009 | benign            |
| A08 | 1  | 216251640 | 216251640 | T  | C    | 253 | 0.26 | <i>USH2A</i>    | NM_206933    | Missense        | p.D1788G  | -2.43 | Neutral     | 0.36 | Tolerated | 0.801 | possibly damaging |
| A08 | 1  | 186064409 | 186064409 | G  | C    | 105 | 0.15 | <i>HMCN1</i>    | NM_031935    | Missense        | p.E3443D  | -1.02 | Neutral     | 0.23 | Tolerated | 0.997 | probably damaging |
| A08 | 1  | 75072303  | 75072303  | C  | A    | 165 | 0.50 | <i>Clorf173</i> | NM_001002912 | Nonsense        | p.E491_   | NA    | NA          | 0.28 | Tolerated | NA    | NA                |
| A08 | 4  | 47954636  | 47954636  | T  | C    | 135 | 0.40 | <i>CNGA1</i>    | NM_001142564 | Missense        | p.E97G    | -0.71 | Neutral     | 0.41 | Tolerated | 0.016 | benign            |
| A08 | 11 | 88780630  | 88780630  | G  | T    | 85  | 0.26 | <i>GRM5</i>     | NM_001143831 | Missense        | p.F137L   | 0     | Neutral     | NA   | NA        | 0.001 | benign            |
| A08 | 9  | 138378527 | 138378527 | T  | A    | 15  | 0.33 | <i>PPP1R26</i>  | NM_014811    | Missense        | p.F724Y   | -2.42 | Neutral     | 0.08 | Tolerated | 0.997 | probably damaging |
| A08 | 7  | 148526841 | 148526841 | C  | T    | 94  | 0.16 | <i>EZH2</i>     | NM_004456    | Missense        | p.G155R   | -7.72 | Deleterious | 0.1  | Tolerated | 0.983 | probably damaging |
| A08 | 6  | 51774093  | 51774093  | C  | A    | 95  | 0.17 | <i>PKHD1</i>    | NM_138694    | Nonsense        | p.G2224_  | NA    | NA          | 0    | Damaging  | NA    | NA                |
| A08 | 5  | 66426248  | 66426248  | T  | G    | 141 | 0.44 | <i>MAST4</i>    | NM_015183    | Splice Site     | p.G463sp  | NA    | NA          | NA   | NA        | NA    | NA                |
| A08 | 19 | 55255446  | 55255446  | C  | A    | 90  | 0.39 | <i>KIR2DL3</i>  | NM_015868    | Missense        | p.H192N   | -5.25 | Deleterious | 0    | Damaging  | 0.98  | probably damaging |
| A08 | 11 | 125765167 | 125765167 | A  | G    | 88  | 0.48 | <i>PUS3</i>     | NM_031307    | Missense        | p.I299T   | -4.09 | Deleterious | 0    | Damaging  | 1     | probably damaging |
| A08 | 10 | 20534346  | 20534346  | T  | G    | 75  | 0.28 | <i>PLXDC2</i>   | NM_032812    | Missense        | p.I462S   | -3.16 | Deleterious | 0.01 | Damaging  | 0.634 | possibly damaging |
| A08 | 2  | 227985831 | 227985831 | T  | C    | 33  | 0.24 | <i>COL4A4</i>   | NM_000092    | Missense        | p.I76V    | 0.01  | Neutral     | 0.29 | Tolerated | 0.877 | possibly damaging |
| A08 | 19 | 59059689  | 59059689  | A  | G    | 83  | 0.25 | <i>TRIM28</i>   | NM_005762    | Missense        | p.K377R   | 0.05  | Neutral     | 0.58 | Tolerated | 0.996 | probably damaging |
| A08 | 12 | 83251034  | 83251034  | T  | A    | 65  | 0.31 | <i>TMTC2</i>    | NM_152588    | Missense        | p.L110H   | -4.43 | Deleterious | 0.04 | Damaging  | 0.995 | probably damaging |
| A08 | 10 | 91162844  | 91162844  | T  | A    | 189 | 0.46 | <i>IFIT1</i>    | NM_001548    | Missense        | p.L271H   | -6.64 | Deleterious | 0.01 | Damaging  | 1     | probably damaging |
| A08 | 10 | 18280212  | 18280212  | C  | T    | 128 | 0.20 | <i>SLC39A12</i> | NM_001145195 | Missense        | p.L468F   | -1.56 | Neutral     | 0.13 | Tolerated | 0.406 | benign            |
| A08 | 17 | 29552143  | 29552143  | C  | CT   | 113 | 0.39 | <i>NF1</i>      | NM_001042492 | Frame_Shift_Ins | p.L626fs  | NA    | NA          | NA   | NA        | NA    | NA                |
| A08 | 6  | 154743691 | 154743691 | G  | T    | 104 | 0.26 | <i>CNKSR3</i>   | NM_173515    | Missense        | p.N298K   | -2    | Neutral     | 0.2  | Tolerated | 0.02  | benign            |
| A08 | 5  | 101795467 | 101795467 | T  | G    | 119 | 0.18 | <i>SLCO6A1</i>  | NM_173488    | Missense        | p.N305T   | -1.88 | Neutral     | 0.48 | Tolerated | 0.964 | probably damaging |
| A08 | 12 | 49444959  | 49444959  | T  | TG   | 22  | 0.23 | <i>MLL2</i>     | NM_003482    | Frame_Shift_Ins | p.Q836fs  | NA    | NA          | NA   | NA        | NA    | NA                |
| A08 | 11 | 22248963  | 22248963  | G  | A    | 133 | 0.21 | <i>ANO5</i>     | NM_213599    | Missense        | p.R160H   | -1.98 | Neutral     | 0.15 | Tolerated | 0.002 | benign            |
| A08 | 17 | 7578406   | 7578406   | C  | T    | 8   | 1.00 | <i>TP53</i>     | NM_000546    | Missense        | p.R175H   | -4.87 | Deleterious | 0    | Damaging  | 1     | probably damaging |
| A08 | 9  | 123927219 | 123927219 | A  | G    | 83  | 0.24 | <i>CNTRL</i>    | NM_007018    | Splice Site     | p.R1808sp | NA    | NA          | NA   | NA        | NA    | NA                |
| A08 | 2  | 179436634 | 179436634 | C  | T    | 109 | 0.42 | <i>TTN</i>      | NM_001267550 | Missense        | p.R24742H | -3.07 | Deleterious | 0    | Damaging  | 0.031 | benign            |
| A08 | 20 | 56140543  | 56140543  | C  | T    | 56  | 0.41 | <i>PCK1</i>     | NM_002591    | Missense        | p.R518W   | -4.89 | Deleterious | 0    | Damaging  | 1     | probably damaging |
| A08 | 8  | 67590106  | 67590106  | A  | T    | 40  | 0.23 | <i>C8orf44</i>  | NM_019607    | Nonsense        | p.R55_    | NA    | NA          | 0.61 | Tolerated | NA    | NA                |
| A08 | 7  | 148506429 | 148506429 | A  | C    | 116 | 0.21 | <i>EZH2</i>     | NM_004456    | Missense        | p.S695A   | -2.62 | Deleterious | 0.07 | Tolerated | 0.998 | probably damaging |
| A09 | 7  | 20438549  | 20438549  | G  | A    | 62  | 0.47 | <i>ITGB8</i>    | NM_002214    | Missense        | p.A405T   | -3.26 | Deleterious | 0.03 | Damaging  | 0.958 | probably damaging |
| A09 | 1  | 211966505 | 211966505 | G  | C    | 193 | 0.59 | <i>LPGAT1</i>   | NM_014873    | Missense        | p.A89G    | -1.12 | Neutral     | 0.34 | Tolerated | 0.09  | benign            |

|     |    |           |           |   |   |     |      |                  |              |             |           |       |             |      |           |       |                   |
|-----|----|-----------|-----------|---|---|-----|------|------------------|--------------|-------------|-----------|-------|-------------|------|-----------|-------|-------------------|
| A09 | 16 | 84456041  | 84456041  | G | A | 48  | 0.50 | <i>ATP2C2</i>    | NM_014861    | Missense    | p.E224K   | -2.35 | Neutral     | 0.71 | Tolerated | 0.606 | possibly damaging |
| A09 | 17 | 15234674  | 15234674  | C | T | 89  | 0.42 | <i>TEKT3</i>     | NM_031898    | Missense    | p.E77K    | -0.48 | Neutral     | 0.78 | Tolerated | 0.475 | possibly damaging |
| A09 | X  | 27998830  | 27998830  | C | T | 23  | 0.43 | <i>DCAF8L1</i>   | NM_001017930 | Missense    | p.G208S   | -6    | Deleterious | 0.01 | Damaging  | 1     | probably damaging |
| A09 | 4  | 123230424 | 123230424 | A | G | 84  | 0.36 | <i>KLAA1109</i>  | NM_015312    | Missense    | p.N3353D  | -2.61 | Deleterious | 0.34 | Tolerated | 0.455 | possibly damaging |
| A09 | 10 | 38121212  | 38121212  | A | C | 138 | 0.40 | <i>ZNF248</i>    | NM_021045    | Missense    | p.N357K   | -0.68 | Neutral     | 0    | Damaging  | 0.808 | possibly damaging |
| A09 | 20 | 57561861  | 57561861  | A | G | 60  | 0.38 | <i>NELFCD</i>    | NM_198976    | Missense    | p.N95D    | -3.54 | Deleterious | 0.05 | Damaging  | 0.999 | probably damaging |
| A09 | 1  | 76387914  | 76387914  | G | A | 90  | 0.39 | <i>ASB17</i>     | NM_080868    | Missense    | p.P178S   | -1.27 | Neutral     | 0    | Damaging  | 1     | probably damaging |
| A09 | 6  | 111688923 | 111688923 | G | A | 123 | 0.10 | <i>REV3L</i>     | NM_002912    | Missense    | p.P2023L  | -1.36 | Neutral     | 0.16 | Tolerated | 0     | benign            |
| A09 | 11 | 102815071 | 102815071 | G | T | 154 | 0.31 | <i>MMP13</i>     | NM_002427    | Missense    | p.P447H   | 0     | Neutral     | 0.08 | Tolerated | 0.016 | benign            |
| A09 | 10 | 30317689  | 30317689  | G | A | 51  | 0.53 | <i>KLAA1462</i>  | NM_020848    | Missense    | p.P463L   | -5.71 | Deleterious | 0.56 | Tolerated | 0.987 | probably damaging |
| A09 | 12 | 49433004  | 49433004  | C | T | 71  | 0.27 | <i>MLL2</i>      | NM_003482    | Splice Site | p.R2789sp | NA    | NA          | NA   | NA        | NA    | NA                |
| A09 | 20 | 42907758  | 42907758  | C | T | 46  | 0.43 | <i>GDAP1L1</i>   | NM_001256737 | Missense    | p.R327C   | -5.97 | Deleterious | 0    | Damaging  | 1     | probably damaging |
| A09 | 3  | 153870621 | 153870621 | C | T | 140 | 0.43 | <i>ARHGEF26</i>  | NM_001251962 | Nonsense    | p.R463_   | NA    | NA          | 0.7  | Tolerated | NA    | NA                |
| A09 | 15 | 48905269  | 48905269  | C | T | 99  | 0.39 | <i>FBN1</i>      | NM_000138    | Missense    | p.R62H    | -3.49 | Deleterious | 0.03 | Damaging  | 0.999 | probably damaging |
| A09 | X  | 130410972 | 130410972 | C | T | 107 | 0.47 | <i>IGSF1</i>     | NM_001170961 | Missense    | p.R855Q   | -0.55 | Neutral     | 0.12 | Tolerated | 1     | probably damaging |
| A09 | 4  | 7840366   | 7840366   | G | A | 73  | 0.38 | <i>AFAP1</i>     | NM_001134647 | Missense    | p.T204M   | 0     | Neutral     | 0.06 | Tolerated | 0.575 | possibly damaging |
| A09 | 1  | 220091782 | 220091782 | G | A | 106 | 0.61 | <i>SLC30A10</i>  | NM_018713    | Missense    | p.T258M   | -2.43 | Neutral     | NA   | NA        | 1     | probably damaging |
| A09 | 3  | 195453044 | 195453044 | A | G | 103 | 0.14 | <i>MUC20</i>     | NM_152673    | Missense    | p.T353A   | -2.47 | Neutral     | 0    | Damaging  | 0.873 | possibly damaging |
| A09 | 7  | 123517085 | 123517085 | A | G | 105 | 0.48 | <i>HYAL4</i>     | NM_012269    | Missense    | p.Y441C   | -2.86 | Deleterious | 0.01 | Damaging  | 0.062 | benign            |
| A10 | 20 | 32369141  | 32369141  | A | G | 39  | 0.38 | <i>ZNF341</i>    | NM_032819    | Missense    | p.E549G   | -4.21 | Deleterious | 0.34 | Tolerated | 0.286 | benign            |
| A10 | 8  | 71495903  | 71495903  | A | C | 78  | 0.44 | <i>TRAM1</i>     | NM_014294    | Missense    | p.F291C   | -6.33 | Deleterious | 0.01 | Damaging  | 0.998 | probably damaging |
| A10 | 6  | 30624451  | 30624451  | T | C | 31  | 0.61 | <i>DHX16</i>     | NM_003587    | Missense    | p.H745R   | -3.14 | Deleterious | 0    | Damaging  | 0.411 | benign            |
| A10 | 7  | 139572087 | 139572087 | A | G | 65  | 0.55 | <i>TBXAS1</i>    | NM_001166253 | Missense    | p.K49R    | -1.36 | Neutral     | 0.24 | Tolerated | 0.993 | probably damaging |
| A10 | 12 | 53553483  | 53553483  | T | C | 12  | 0.50 | <i>CSAD</i>      | NM_015989    | Missense    | p.N438S   | -4.96 | Deleterious | 0.21 | Tolerated | 1     | probably damaging |
| A10 | 9  | 96212852  | 96212852  | C | T | 74  | 0.49 | <i>FAM120AOS</i> | NM_198841    | Missense    | p.R198Q   | -1    | Neutral     | 0    | Damaging  | 0.017 | benign            |
| A10 | 16 | 61687916  | 61687916  | G | A | 64  | 0.50 | <i>CDH8</i>      | NM_001796    | Missense    | p.R666C   | -3.12 | Deleterious | 0.03 | Damaging  | 0.999 | probably damaging |
| A10 | 6  | 155743923 | 155743923 | C | T | 55  | 0.44 | <i>NOX3</i>      | NM_015718    | Missense    | p.V405I   | -0.33 | Neutral     | 0.29 | Tolerated | 0.003 | benign            |
| A11 | 17 | 48356273  | 48356273  | C | A | 21  | 0.62 | <i>TMEM92</i>    | NM_001168215 | Nonsense    | p.C94_    | NA    | NA          | 0.24 | Tolerated | NA    | NA                |
| A11 | 2  | 179501157 | 179501157 | T | C | 93  | 0.43 | <i>TTN</i>       | NM_001267550 | Missense    | p.E13766G | -4.71 | Deleterious | 0    | Damaging  | 1     | probably damaging |
| A11 | 1  | 158612269 | 158612269 | C | T | 90  | 0.54 | <i>SPTA1</i>     | NM_003126    | Missense    | p.G1557S  | -0.99 | Neutral     | 0.93 | Tolerated | 0.012 | benign            |
| A11 | 6  | 31914062  | 31914062  | G | T | 34  | 0.50 | <i>CFB</i>       | NM_001710    | Missense    | p.G22C    | -0.06 | Neutral     | 0.13 | Tolerated | 1     | probably damaging |
| A11 | 19 | 55481405  | 55481405  | G | A | 57  | 0.47 | <i>NLRP2</i>     | NM_001174081 | Missense    | p.G8S     | -0.66 | Neutral     | 0.35 | Tolerated | 0.412 | benign            |
| A11 | X  | 84526469  | 84526469  | C | A | 54  | 0.41 | <i>ZNF711</i>    | NM_021998    | Missense    | p.H641N   | -6.88 | Deleterious | 0    | Damaging  | 0.997 | probably damaging |

|     |    |           |           |                  |        |     |      |                  |               |                 |                 |           |             |      |           |       |                   |    |
|-----|----|-----------|-----------|------------------|--------|-----|------|------------------|---------------|-----------------|-----------------|-----------|-------------|------|-----------|-------|-------------------|----|
| A11 | 14 | 45566201  | 45566201  | A                | G      | 59  | 0.39 | <i>PRPF39</i>    | NM_017922     | Missense        | p.I188V         | -0.6      | Neutral     | 0.7  | Tolerated | 0.005 | benign            |    |
| A11 | 7  | 26246003  | 26246003  | A                | G      | 26  | 0.31 | <i>CBX3</i>      | NM_007276     | Missense        | p.K14E          | -1.36     | Neutral     | 0.05 | Damaging  | 0.991 | probably damaging |    |
| A11 | 1  | 110256150 | 110256150 | T                | A      | 79  | 0.42 | <i>GSTM5</i>     | NM_000851     | Missense        | p.N74K          | -5.44     | Deleterious | 0.09 | Tolerated | 0.997 | probably damaging |    |
| A11 | 7  | 140246688 | 140246688 | G                | A      | 31  | 0.45 | <i>DENND2A</i>   | NM_015689     | Missense        | p.P697S         | -7.27     | Deleterious | 0.05 | Damaging  | 1     | probably damaging |    |
| A11 | 9  | 14722651  | 14722651  | T                | G      | 41  | 0.44 | <i>CER1</i>      | NM_005454     | Missense        | p.Q7P           | -1.24     | Neutral     | 0    | Damaging  | 0.994 | probably damaging |    |
| A11 | 2  | 212285167 | 212285167 | C                | T      | 18  | 0.56 | <i>ERBB4</i>     | NM_005235     | Missense        | p.R1045K        | -0.75     | Neutral     | 0.74 | Tolerated | 0.002 | benign            |    |
| A11 | 5  | 61923102  | 61923102  | C                | T      | 39  | 0.38 | <i>IPO11</i>     | NM_001134779  | Missense        | p.T1002M        | -1.02     | Neutral     | 0.02 | Damaging  | 0.998 | probably damaging |    |
| A11 | 15 | 60653207  | 60653207  | G                | A      | 44  | 0.55 | <i>ANXA2</i>     | NM_001002858  | Missense        | p.T115M         | -1.11     | Neutral     | 0.01 | Damaging  | 0.584 | possibly damaging |    |
| A11 | X  | 111697970 | 111697970 | C                | T      | 71  | 0.42 | <i>ZCCHC16</i>   | NM_001004308  | Missense        | p.T5M           | -1.12     | Neutral     | 0.05 | Damaging  | 0.931 | possibly damaging |    |
| A11 | 9  | 37020768  | 37020768  | A                | AC     | 70  | 0.40 | <i>PAX5</i>      | NM_016734     | Frame_Shift_Ins | p.V26fs         | NA        | NA          | NA   | NA        | NA    | NA                |    |
| A11 | 15 | 25213117  | 25213117  | T                | C      | 68  | 0.35 | <i>SNURF</i>     | NM_022804     | Missense        | p.V50A          | -1.92     | Neutral     | 0.19 | Tolerated | 0.001 | benign            |    |
| A12 | 11 | 72466018  | 72466018  | G                | A      | 66  | 0.55 | <i>STARD10</i>   | NM_006645     | Missense        | p.A267V         | -0.82     | Neutral     | 0.28 | Tolerated | 0.769 | possibly damaging |    |
| A12 | 7  | 93055801  | 93055801  | G                | A      | 98  | 0.54 | <i>CALCR</i>     | NM_001164737  | Missense        | p.A465V         | -0.66     | Neutral     | 0.23 | Tolerated | 0.734 | possibly damaging |    |
| A12 | 20 | 1286025   | 1286025   | G                | T      | 76  | 0.45 | <i>SNPH</i>      | NM_014723     | Missense        | p.G271V         | -0.98     | Neutral     | 0.57 | Tolerated | 1     | probably damaging |    |
| A12 | 10 | 114205096 | 114205096 | T                | C      | 110 | 0.45 | <i>ZDHHC6</i>    | NM_022494     | Missense        | p.I33M          | -0.57     | Neutral     | 0.11 | Tolerated | 0.958 | probably damaging |    |
| A12 | 21 | 36259198  | 36259199  | AG               | A      | 42  | 0.40 | <i>RUNX1</i>     | NM_001001890  | Frame_Shift_Del | p.L71fs         | NA        | NA          | NA   | NA        | NA    | NA                |    |
| A12 | 19 | 44118276  | 44118276  | C                | T      | 161 | 0.40 | <i>SRRM5</i>     | NM_001145641  | Missense        | p.P668L         | -1.26     | Neutral     | 0.22 | Tolerated | 0.002 | benign            |    |
| A12 | X  | 129149895 | 129149906 | GAAAATGGAG<br>AA |        | GG  | 112  | 0.17             | <i>BCORL1</i> | NM_021946       | Frame_Shift_Del | p.V1049fs | NA          | NA   | NA        | NA    | NA                | NA |
| A12 | 19 | 36018339  | 36018339  | A                | G      | 131 | 0.37 | <i>SBSN</i>      | NM_001166034  | Missense        | p.V282A         | -0.05     | Neutral     | 0.85 | Tolerated | 0     | benign            |    |
| A13 | 16 | 75611244  | 75611244  | G                | A      | 46  | 0.28 | <i>GABARAPL2</i> | NM_007285     | Missense        | p.G111R         | -7.22     | Deleterious | 0    | Damaging  | 0.942 | possibly damaging |    |
| A13 | 3  | 49412983  | 49412983  | C                | T      | 42  | 0.14 | <i>RHOA</i>      | NM_001664     | Missense        | p.G14R          | -6.83     | Deleterious | 0    | Damaging  | 1     | probably damaging |    |
| A13 | 19 | 41021241  | 41021241  | T                | A      | 8   | 0.38 | <i>SPTBN4</i>    | NM_020971     | Missense        | p.M930K         | -5.45     | Deleterious | 0    | Damaging  | 0.999 | probably damaging |    |
| A13 | 20 | 13867026  | 13867026  | G                | A      | 53  | 0.45 | <i>SELIL2</i>    | NM_001271539  | Missense        | p.P270S         | -0.79     | Neutral     | 0.81 | Tolerated | 0.061 | benign            |    |
| A13 | 9  | 5231714   | 5231714   | C                | T      | 13  | 0.54 | <i>INSL4</i>     | NM_002195     | Missense        | p.P64L          | -3.35     | Deleterious | 0.3  | Tolerated | 0.006 | benign            |    |
| A13 | 15 | 81188338  | 81188338  | C                | T      | 63  | 0.29 | <i>KIAA1199</i>  | NM_018689     | Nonsense        | p.Q450_         | NA        | NA          | 0.03 | Damaging  | NA    | NA                |    |
| A13 | 8  | 113353783 | 113353783 | C                | A      | 89  | 0.39 | <i>CSMD3</i>     | NM_198123     | Missense        | p.S2192I        | -5.72     | Deleterious | 0.01 | Damaging  | 1     | probably damaging |    |
| A13 | 19 | 16268225  | 16268225  | A                | G      | 40  | 0.15 | <i>HSH2D</i>     | NM_032855     | Missense        | p.T227A         | 0.19      | Neutral     | 1    | Tolerated | 0.004 | benign            |    |
| A13 | 11 | 19077936  | 19077936  | G                | A      | 104 | 0.43 | <i>MRGPRX2</i>   | NM_054030     | Missense        | p.T5I           | 0.28      | Neutral     | 1    | Tolerated | 0     | benign            |    |
| A13 | 5  | 110712615 | 110712615 | G                | A      | 127 | 0.26 | <i>CAMK4</i>     | NM_001744     | Missense        | p.V121I         | -0.79     | Neutral     | 0    | Damaging  | 0.985 | probably damaging |    |
| A14 | 7  | 142643320 | 142643320 | C                | A      | 43  | 0.40 | <i>KEL</i>       | NM_000420     | Missense        | p.A430S         | -0.68     | Neutral     | 0.47 | Tolerated | 0.27  | benign            |    |
| A14 | X  | 53230850  | 53230850  | A                | ATGTCC | 27  | 0.33 | <i>KDM5C</i>     | NM_004187     | Frame_Shift_Ins | p.I648fs        | NA        | NA          | NA   | NA        | NA    | NA                |    |

|     |    |           |           |           |               |     |      |                |              |                 |                         |       |             |      |           |       |                   |
|-----|----|-----------|-----------|-----------|---------------|-----|------|----------------|--------------|-----------------|-------------------------|-------|-------------|------|-----------|-------|-------------------|
| A14 | 13 | 25670802  | 25670802  | A         | T             | 93  | 0.09 | <i>PABPC3</i>  | NM_030979    | Nonsense        | p.K156_                 | NA    | NA          | 0.47 | Tolerated | NA    | NA                |
| A14 | X  | 53239864  | 53239864  | A         | C             | 32  | 0.25 | <i>KDM5C</i>   | NM_004187    | Missense        | p.L526R                 | -5.31 | Deleterious | 0    | Damaging  | 1     | probably damaging |
| A14 | 20 | 1559047   | 1559047   | G         | A             | 61  | 0.31 | <i>SIRPB1</i>  | NM_006065    | Missense        | p.R124W                 | -4.62 | Deleterious | 0    | Damaging  | 0.319 | benign            |
| A14 | 12 | 6936278   | 6936278   | G         | A             | 39  | 0.13 | <i>GPR162</i>  | NM_019858    | Missense        | p.R559H                 | -0.5  | Neutral     | 0.02 | Damaging  | 0.997 | probably damaging |
| A14 | 7  | 143657713 | 143657713 | C         | T             | 43  | 0.49 | <i>OR2F1</i>   | NM_012369    | Missense        | p.S217F                 | -5.96 | Deleterious | 0    | Damaging  | 1     | probably damaging |
| A14 | 15 | 54592571  | 54592571  | C         | T             | 50  | 0.32 | <i>UNC13C</i>  | NM_001080534 | Missense        | p.T1423M                | -5.84 | Deleterious | 0.01 | Damaging  | 1     | probably damaging |
| A14 | 11 | 62752098  | 62752098  | G         | A             | 25  | 0.36 | <i>SLC22A6</i> | NM_004790    | Missense        | p.T22I                  | -1.27 | Neutral     | 0.68 | Tolerated | 0.079 | benign            |
| A14 | 3  | 124951284 | 124951285 | TG        | TTCT          | 60  | 0.15 | <i>ZNF148</i>  | NM_021964    | Frame_Shift_Ins | p.T762fs                | NA    | NA          | NA   | NA        | NA    | NA                |
| A14 | 7  | 98457900  | 98457900  | A         | C             | 50  | 0.30 | <i>TMEM130</i> | NM_001134450 | Nonsense        | p.Y151_                 | NA    | NA          | 0.89 | Tolerated | NA    | NA                |
| A14 | 13 | 28592620  | 28592620  | T         | C             | 43  | 0.19 | <i>FLT3</i>    | NM_004119    | Missense        | p.Y842C                 | -8.17 | Deleterious | 0    | Damaging  | 1     | probably damaging |
| A15 | 11 | 59811020  | 59811020  | C         | T             | 59  | 0.25 | <i>PLAC1L</i>  | NM_173801    | Missense        | p.A48V                  | -1.04 | Neutral     | 0.17 | Tolerated | 0.995 | probably damaging |
| A15 | 1  | 66384437  | 66384437  | A         | G             | 36  | 0.81 | <i>PDE4B</i>   | NM_001037341 | Missense        | p.E67G                  | -0.8  | Neutral     | 0.45 | Tolerated | 0     | benign            |
| A15 | 22 | 29192146  | 29192154  | TCAGCAGAC | T             | 54  | 0.44 | <i>XBPI</i>    | NM_001079539 | Frame_Shift_Del | p.G160fs                | NA    | NA          | NA   | NA        | NA    | NA                |
| A15 | 6  | 13182858  | 13182858  | A         | G             | 67  | 0.37 | <i>PHACTR1</i> | NM_001242648 | Missense        | p.M202V                 | -0.55 | Neutral     | 0.3  | Tolerated | 0.021 | benign            |
| A15 | 15 | 72492875  | 72492875  | G         | GT            | 23  | 0.48 | <i>PKM</i>     | NM_182471    | Frame_Shift_Ins | p.P477fs                | NA    | NA          | NA   | NA        | NA    | NA                |
| A15 | 6  | 142691792 | 142691792 | C         | T             | 214 | 0.33 | <i>GPR126</i>  | NM_198569    | Nonsense        | p.R311_                 | NA    | NA          | 1    | Tolerated | NA    | NA                |
| A15 | 4  | 90169365  | 90169365  | G         | A             | 34  | 0.21 | <i>GPRIN3</i>  | NM_198281    | Missense        | p.R633C                 | -4.87 | Deleterious | 0    | Damaging  | 1     | probably damaging |
| A15 | 1  | 236702306 | 236702306 | C         | T             | 54  | 0.13 | <i>LGALS8</i>  | NM_201545    | Missense        | p.R88W                  | -0.99 | Neutral     | 0.05 | Damaging  | 0.008 | benign            |
| A15 | 5  | 13762917  | 13762917  | C         | T             | 39  | 0.46 | <i>DNAH5</i>   | NM_001369    | Missense        | p.V3399I                | -1    | Neutral     | 0.05 | Damaging  | 0.991 | probably damaging |
| A16 | X  | 41056715  | 41056715  | G         | GA            | 15  | 0.93 | <i>USP9X</i>   | NM_001039590 | Frame_Shift_Ins | p.E1444fs               | NA    | NA          | NA   | NA        | NA    | NA                |
| A16 | 6  | 5404817   | 5404823   | GAACAAA   | GTCCTGA<br>GG | 39  | 0.51 | <i>FARS2</i>   | NM_006567    | Frame_Shift_Ins | p.E219fs                | NA    | NA          | NA   | NA        | NA    | NA                |
| A16 | 11 | 35006228  | 35006228  | A         | T             | 89  | 0.54 | <i>PDHX</i>    | NM_003477    | Nonsense        | p.K379_                 | NA    | NA          | 1    | Tolerated | NA    | NA                |
| A16 | 1  | 152586351 | 152586351 | C         | T             | 13  | 1.00 | <i>LCE3B</i>   | NM_178433    | Missense        | p.P22L                  | -8.89 | Deleterious | 0.04 | Damaging  | 0.998 | probably damaging |
| A16 | 3  | 196792172 | 196792172 | T         | G             | 102 | 0.49 | <i>DLG1</i>    | NM_004087    | Missense        | p.Q816P                 | -4.1  | Deleterious | 0.05 | Damaging  | 0.998 | probably damaging |
| A16 | 11 | 92531151  | 92531151  | C         | T             | 135 | 0.44 | <i>FAT3</i>    | NM_001008781 | Missense        | p.R1658C                | -3.2  | Deleterious | 0.03 | Damaging  | 1     | probably damaging |
| A16 | 10 | 95553086  | 95553086  | C         | T             | 77  | 0.52 | <i>LGII</i>    | NM_005097    | Missense        | p.R273W                 | -6.65 | Deleterious | 0    | Damaging  | 1     | probably damaging |
| A16 | 3  | 129247721 | 129247721 | G         | A             | 26  | 0.58 | <i>RHO</i>     | NM_000539    | Missense        | p.V49M                  | -0.52 | Neutral     | 0.05 | Damaging  | 0.013 | benign            |
| A16 | 2  | 10140749  | 10140749  | G         | T             | 95  | 0.48 | <i>GRHL1</i>   | NM_198182    | Missense        | p.V591L                 | -1.19 | Neutral     | 0.1  | Tolerated | 0.317 | benign            |
| A17 | 3  | 47088004  | 47088005  | TG        | TCGC          | 45  | 0.40 | <i>SETD2</i>   | NM_014159    | Frame_Shift_Ins | p.A2357fs               | NA    | NA          | NA   | NA        | NA    | NA                |
| A17 | 13 | 28608275  | 28608277  | AAA       | CAT           | 149 | 0.50 | <i>FLT3</i>    | NM_004119    | Missense        | p.D593_F594d<br>elinsEC | -6.36 | Deleterious | NA   | NA        | NA    | NA                |
| A17 | 10 | 17026259  | 17026259  | A         | C             | 64  | 0.47 | <i>CUBN</i>    | NM_001081    | Missense        | p.F1457C                | -3.14 | Deleterious | 0.2  | Tolerated | 0.999 | probably damaging |



|     |    |           |           |     |              |     |      |                 |              |                 |           |       |             |      |           |       |                   |
|-----|----|-----------|-----------|-----|--------------|-----|------|-----------------|--------------|-----------------|-----------|-------|-------------|------|-----------|-------|-------------------|
| A17 | 7  | 116422068 | 116422069 | CT  | C            | 119 | 0.46 | <i>MET</i>      | NM_000245    | Frame_Shift_Del | p.G1183fs | NA    | NA          | NA   | NA        | NA    | NA                |
| A17 | 1  | 100584613 | 100584613 | A   | T            | 84  | 0.50 | <i>SASS6</i>    | NM_194292    | Missense        | p.H210Q   | -4.58 | Deleterious | 0.25 | Tolerated | 1     | probably damaging |
| A17 | 22 | 29192127  | 29192127  | T   | TAGTCTT<br>G | 43  | 0.47 | <i>XBPI</i>     | NM_005080    | Frame_Shift_Ins | p.L169fs  | NA    | NA          | NA   | NA        | NA    | NA                |
| A17 | 19 | 39899200  | 39899200  | C   | G            | 39  | 0.41 | <i>ZFP36</i>    | NM_003407    | Missense        | p.P287R   | -0.6  | Neutral     | 0.38 | Tolerated | 0.995 | probably damaging |
| A17 | 2  | 3743321   | 3743321   | C   | T            | 134 | 0.13 | <i>ALLC</i>     | NM_018436    | Nonsense        | p.R176_   | NA    | NA          | 1    | Tolerated | NA    | NA                |
| A17 | 15 | 42003170  | 42003171  | AG  | A            | 213 | 0.30 | <i>MGA</i>      | NM_001080541 | Frame_Shift_Del | p.R903fs  | NA    | NA          | NA   | NA        | NA    | NA                |
| A17 | 18 | 43311054  | 43311054  | G   | A            | 42  | 0.57 | <i>SLC14A1</i>  | NM_001128588 | Missense        | p.V132I   | 0.76  | Neutral     | 0.27 | Tolerated | 0     | benign            |
| A17 | 9  | 96051555  | 96051555  | G   | A            | 19  | 0.47 | <i>WNK2</i>     | NM_006648    | Missense        | p.V1507I  | -0.18 | Neutral     | 0.27 | Tolerated | 0.429 | benign            |
| A17 | 3  | 101390039 | 101390039 | T   | C            | 211 | 0.46 | <i>ZBTB11</i>   | NM_014415    | Missense        | p.Y238C   | -1.89 | Neutral     | 0    | Damaging  | 1     | probably damaging |
| A18 | 22 | 50886872  | 50886872  | C   | G            | 58  | 0.48 | <i>SBF1</i>     | NM_002972    | Missense        | p.G1718A  | -0.64 | Neutral     | 0.73 | Tolerated | 0.05  | benign            |
| A18 | 1  | 11015120  | 11015120  | T   | C            | 23  | 0.35 | <i>C1orf127</i> | NM_001170754 | Missense        | p.N301S   | -2.29 | Neutral     | 0.12 | Tolerated | 0.025 | benign            |
| A18 | 5  | 135587360 | 135587360 | G   | A            | 40  | 0.33 | <i>TRPC7</i>    | NM_020389    | Missense        | p.P519L   | -2.54 | Deleterious | 0.64 | Tolerated | 0.057 | benign            |
| A18 | 9  | 79635295  | 79635295  | C   | T            | 10  | 0.40 | <i>FOXB2</i>    | NM_001013735 | Missense        | p.S242F   | -0.85 | Neutral     | 0.01 | Damaging  | 0.019 | benign            |
| A18 | 3  | 49161296  | 49161296  | G   | A            | 65  | 0.55 | <i>LAMB2</i>    | NM_002292    | Missense        | p.T1221M  | -2.7  | Deleterious | 0.11 | Tolerated | 0.987 | probably damaging |
| A18 | 4  | 120240238 | 120240240 | TAC | AAG          | 54  | 0.43 | <i>FABP2</i>    | NM_000134    | Missense        | p.V119L   | -0.8  | Neutral     | NA   | NA        | NA    | NA                |
| A19 | 5  | 162932712 | 162932712 | A   | C            | 21  | 0.33 | <i>MAT2B</i>    | NM_013283    | Missense        | p.E7A     | -0.37 | Neutral     | 0.32 | Tolerated | 0.705 | possibly damaging |
| A19 | 7  | 44189566  | 44189567  | AC  | A            | 53  | 0.32 | <i>GCK</i>      | NM_000162    | Splice Site     | p.G193sp  | NA    | NA          | NA   | NA        | NA    | NA                |
| A19 | 12 | 49433301  | 49433302  | GC  | G            | 27  | 0.37 | <i>MLL2</i>     | NM_003482    | Frame_Shift_Del | p.G2715fs | NA    | NA          | NA   | NA        | NA    | NA                |
| A19 | 8  | 25226164  | 25226164  | C   | T            | 76  | 0.09 | <i>DOCK5</i>    | NM_0024940   | Missense        | p.R1121W  | -6.98 | Deleterious | 0    | Damaging  | 1     | probably damaging |
| A19 | 10 | 124390771 | 124390771 | G   | A            | 85  | 0.35 | <i>DMBT1</i>    | NM_007329    | Missense        | p.R1978H  | 0.79  | Neutral     | 0.23 | Tolerated | 0.997 | probably damaging |
| A19 | 15 | 41750044  | 41750044  | G   | C            | 43  | 0.28 | <i>RTF1</i>     | NM_015138    | Missense        | p.R211P   | -6.77 | Deleterious | 0    | Damaging  | 0.979 | probably damaging |
| A19 | 17 | 76816058  | 76816058  | C   | CA           | 92  | 0.32 | <i>USP36</i>    | NM_025090    | Frame_Shift_Ins | p.V289fs  | NA    | NA          | NA   | NA        | NA    | NA                |
| A20 | 22 | 17601413  | 17601413  | G   | GC           | 21  | 0.29 | <i>CECR6</i>    | NM_031890    | Frame_Shift_Ins | p.A202fs  | NA    | NA          | NA   | NA        | NA    | NA                |
| A20 | 19 | 1461989   | 1461989   | G   | A            | 22  | 0.68 | <i>APC2</i>     | NM_005883    | Missense        | p.A556T   | -3.76 | Deleterious | 0    | Damaging  | 1     | probably damaging |
| A20 | 12 | 102190484 | 102190484 | G   | T            | 43  | 0.37 | <i>GNPTAB</i>   | NM_024312    | Missense        | p.D58E    | -2.78 | Deleterious | 0    | Damaging  | 1     | probably damaging |
| A20 | 5  | 121488088 | 121488088 | G   | T            | 48  | 0.35 | <i>ZNF474</i>   | NM_207317    | Nonsense        | p.E135_   | NA    | NA          | 0.74 | Tolerated | NA    | NA                |
| A20 | 7  | 148511200 | 148511200 | T   | C            | 25  | 0.28 | <i>EZH2</i>     | NM_004456    | Missense        | p.K568E   | -3.51 | Deleterious | 0.01 | Damaging  | 0.999 | probably damaging |
| A20 | 13 | 111158795 | 111158795 | C   | T            | 22  | 0.27 | <i>COL4A2</i>   | NM_001846    | Missense        | p.P1479L  | -7.12 | Deleterious | 0.07 | Tolerated | 0.999 | probably damaging |
| A20 | 2  | 165378603 | 165378603 | G   | A            | 17  | 0.35 | <i>GRB14</i>    | NM_004490    | Missense        | p.P235S   | -7.13 | Deleterious | 0    | Damaging  | 1     | probably damaging |
| A20 | 20 | 31021535  | 31021535  | C   | T            | 79  | 0.09 | <i>ASXL1</i>    | NM_015338    | Nonsense        | p.Q512_   | NA    | NA          | 0.32 | Tolerated | NA    | NA                |
| A20 | 10 | 79569450  | 79569450  | C   | T            | 36  | 0.31 | <i>DLG5</i>     | NM_004747    | Missense        | p.R1501H  | -4.36 | Deleterious | 0    | Damaging  | 1     | probably damaging |
| A20 | 18 | 44262028  | 44262028  | C   | T            | 13  | 0.62 | <i>ST8SLA5</i>  | NM_013305    | Splice Site     | p.R190sp  | NA    | NA          | NA   | NA        | NA    | NA                |

|     |    |           |           |   |     |     |      |                         |              |                 |          |       |             |      |           |       |                   |
|-----|----|-----------|-----------|---|-----|-----|------|-------------------------|--------------|-----------------|----------|-------|-------------|------|-----------|-------|-------------------|
| A20 | 13 | 42742581  | 42742581  | G | A   | 32  | 0.22 | <i>DGKH</i>             | NM_178009    | Missense        | p.R375K  | -2.3  | Neutral     | 0.09 | Tolerated | 0.992 | probably damaging |
| A20 | 8  | 23290530  | 23290530  | C | T   | 46  | 0.35 | <i>ENTPD4</i>           | NM_004901    | Missense        | p.R587H  | -2.4  | Neutral     | 0.01 | Damaging  | 0.934 | possibly damaging |
| A20 | 12 | 112926884 | 112926884 | T | G   | 31  | 0.39 | <i>PTPN11</i>           | NM_002834    | Missense        | p.S502A  | -2.76 | Deleterious | 0.06 | Tolerated | 0.726 | possibly damaging |
| A20 | 6  | 147684834 | 147684834 | C | A   | 44  | 0.30 | <i>STXBP5</i>           | NM_001127715 | Missense        | p.T970N  | -3.44 | Deleterious | 0    | Damaging  | 1     | probably damaging |
| A20 | X  | 100749138 | 100749138 | G | A   | 24  | 0.79 | <i>ARMCX4</i>           | NM_001256155 | Nonsense        | p.W1854_ | NA    | NA          | NA   | NA        | NA    | NA                |
| A20 | 3  | 151107771 | 151107771 | A | G   | 93  | 0.37 | <i>MEDI2L</i>           | NM_053002    | Missense        | p.Y1784C | -2.21 | Neutral     | 0.01 | Damaging  | 0.999 | probably damaging |
| A21 | 11 | 88911158  | 88911158  | T | C   | 52  | 0.56 | <i>TYR</i>              | NM_000372    | Missense        | p.F13L   | 0.59  | Neutral     | NA   | NA        | 0.001 | benign            |
| A21 | 1  | 3413600   | 3413600   | C | T   | 69  | 0.39 | <i>MEGF6</i>            | NM_001409    | Missense        | p.G1189R | -7.18 | Deleterious | 0.12 | Tolerated | 0.987 | probably damaging |
| A21 | 11 | 3249551   | 3249551   | C | T   | 49  | 0.47 | <i>MARGPRE</i>          | NM_001039165 | Missense        | p.G160D  | -0.64 | Neutral     | 0.18 | Tolerated | 0.997 | probably damaging |
| A21 | 1  | 74834736  | 74834736  | G | T   | 69  | 0.42 | <i>FPGT-<br/>TNNI3K</i> | NM_001112808 | Missense        | p.G552V  | -0.21 | Neutral     | 0.29 | Tolerated | 0.763 | possibly damaging |
| A21 | 1  | 1572454   | 1572454   | C | T   | 32  | 0.31 | <i>CDK11B</i>           | NM_033486    | Missense        | p.G559S  | NA    | NA          | NA   | NA        | NA    | NA                |
| A21 | 16 | 31144629  | 31144629  | T | G   | 82  | 0.43 | <i>PRSS8</i>            | NM_002773    | Missense        | p.I62L   | -0.04 | Neutral     | 1    | Tolerated | 0.009 | benign            |
| A21 | 14 | 53100374  | 53100374  | G | A   | 149 | 0.44 | <i>GPR137C</i>          | NM_001099652 | Splice Site     | p.L331sp | NA    | NA          | NA   | NA        | NA    | NA                |
| A21 | 5  | 106717051 | 106717051 | G | C   | 59  | 0.46 | <i>EFNA5</i>            | NM_001962    | Missense        | p.P198A  | -3.44 | Deleterious | 0.82 | Tolerated | 0.134 | benign            |
| A21 | 11 | 64534542  | 64534542  | G | GCC | 108 | 0.41 | <i>SF1</i>              | NM_004630    | Frame_Shift_Ins | p.P471fs | NA    | NA          | NA   | NA        | NA    | NA                |
| A21 | 6  | 39073250  | 39073250  | C | A   | 85  | 0.48 | <i>SAYSD1</i>           | NM_018322    | Missense        | p.Q170H  | -4.87 | Deleterious | 0    | Damaging  | 1     | probably damaging |
| A21 | X  | 148055076 | 148055076 | C | T   | 54  | 0.96 | <i>AFF2</i>             | NM_002025    | Missense        | p.R1115C | -5.72 | Deleterious | 0.01 | Damaging  | 1     | probably damaging |
| A21 | 18 | 7050796   | 7050796   | C | T   | 79  | 0.38 | <i>LAMA1</i>            | NM_005559    | Missense        | p.R162H  | -3.39 | Deleterious | 0.58 | Tolerated | 0.828 | possibly damaging |
| A21 | 5  | 121759339 | 121759339 | C | T   | 80  | 0.54 | <i>SNCAIP</i>           | NM_005460    | Missense        | p.R303W  | 4.35  | Neutral     | NA   | NA        | 0.003 | benign            |
| A21 | 12 | 32134559  | 32134559  | A | G   | 142 | 0.46 | <i>KIAA1551</i>         | NM_018169    | Missense        | p.S224G  | -1.83 | Neutral     | NA   | NA        | 0.007 | benign            |
| A21 | 3  | 160142671 | 160142671 | C | T   | 31  | 0.45 | <i>SMC4</i>             | NM_001002800 | Missense        | p.S781L  | -2.97 | Deleterious | 0.23 | Tolerated | 0.348 | benign            |
| A21 | 1  | 115284260 | 115284260 | G | C   | 64  | 0.28 | <i>CSDE1</i>            | NM_001242891 | Nonsense        | p.S9_    | NA    | NA          | 0    | Damaging  | NA    | NA                |
| A21 | 15 | 64496703  | 64496703  | T | TG  | 118 | 0.42 | <i>CSNK1G1</i>          | NM_022048    | Frame_Shift_Ins | p.T312fs | NA    | NA          | NA   | NA        | NA    | NA                |
| A21 | 2  | 179620975 | 179620975 | G | A   | 102 | 0.55 | <i>TTN</i>              | NM_001267550 | Missense        | p.T3743M | -1.29 | Neutral     | 0    | Damaging  | 0.01  | benign            |
| A21 | 12 | 132510265 | 132510265 | G | A   | 93  | 0.46 | <i>EP400</i>            | NM_015409    | Missense        | p.V1644M | -0.29 | Neutral     | 0.24 | Tolerated | 0.535 | possibly damaging |
| A22 | 1  | 248224920 | 248224920 | T | C   | 50  | 0.46 | <i>OR2L3</i>            | NM_001004687 | Missense        | p._313Q  | NA    | NA          | NA   | NA        | NA    | NA                |
| A22 | 1  | 27238557  | 27238557  | C | T   | 24  | 0.33 | <i>NR0B2</i>            | NM_021969    | Missense        | p.A185T  | -0.42 | Neutral     | 0.85 | Tolerated | 0.008 | benign            |
| A22 | 4  | 155410534 | 155410534 | G | T   | 51  | 0.41 | <i>DCHS2</i>            | NM_001142552 | Missense        | p.D658E  | -3.13 | Deleterious | 0    | Damaging  | 1     | probably damaging |
| A22 | 4  | 41749529  | 41749529  | T | C   | 51  | 0.65 | <i>PHOX2B</i>           | NM_003924    | Missense        | p.H89R   | -2.97 | Deleterious | 0.5  | Tolerated | 0.988 | probably damaging |
| A22 | 15 | 77317659  | 77317659  | C | T   | 38  | 0.39 | <i>PSTPIP1</i>          | NM_003978    | Nonsense        | p.Q83_   | NA    | NA          | 0.01 | Damaging  | NA    | NA                |
| A22 | 5  | 178699963 | 178699963 | G | A   | 36  | 0.44 | <i>ADAMTS2</i>          | NM_014244    | Missense        | p.R213C  | -5.63 | Deleterious | 0    | Damaging  | 0.999 | probably damaging |
| A22 | 17 | 79918703  | 79918703  | C | T   | 12  | 0.33 | <i>NOTUM</i>            | NM_178493    | Missense        | p.R28H   | -0.04 | Neutral     | 0.39 | Tolerated | 0.989 | probably damaging |

|     |    |           |           |      |     |     |      |                 |              |                 |            |        |             |      |           |       |                   |
|-----|----|-----------|-----------|------|-----|-----|------|-----------------|--------------|-----------------|------------|--------|-------------|------|-----------|-------|-------------------|
| A23 | 17 | 40362461  | 40362461  | C    | T   | 100 | 0.52 | <i>STAT5B</i>   | NM_012448    | Missense        | p.E579K    | 0.14   | Neutral     | 0.75 | Tolerated | 0.422 | benign            |
| A23 | 20 | 31022439  | 31022439  | G    | GGA | 54  | 0.17 | <i>ASXL1</i>    | NM_015338    | Frame_Shift_Ins | p.G642fs   | NA     | NA          | NA   | NA        | NA    | NA                |
| A23 | 7  | 50607642  | 50607642  | C    | T   | 43  | 0.44 | <i>DDC</i>      | NM_000790    | Missense        | p.G96R     | -2.78  | Deleterious | 0    | Damaging  | 1     | probably damaging |
| A23 | 3  | 183753791 | 183753791 | C    | T   | 56  | 0.52 | <i>HTR3D</i>    | NM_001163646 | Nonsense        | p.Q95_     | NA     | NA          | 0.24 | Tolerated | NA    | NA                |
| A23 | 14 | 90650562  | 90650562  | C    | T   | 101 | 0.43 | <i>KCNK13</i>   | NM_022054    | Missense        | p.R148C    | -7.18  | Deleterious | 0.02 | Damaging  | 1     | probably damaging |
| A23 | 5  | 112321534 | 112321534 | G    | T   | 92  | 0.57 | <i>DCP2</i>     | NM_152624    | Missense        | p.R19L     | -6.4   | Deleterious | 0    | Damaging  | 1     | probably damaging |
| A23 | 12 | 81568670  | 81568670  | G    | A   | 36  | 0.14 | <i>ACSS3</i>    | NM_024560    | Missense        | p.R401H    | -3.45  | Deleterious | 0.01 | Damaging  | 1     | probably damaging |
| A23 | 2  | 172950440 | 172950440 | G    | A   | 105 | 0.46 | <i>DLX1</i>     | NM_178120    | Missense        | p.S12N     | -0.97  | Neutral     | 0.03 | Damaging  | 0.936 | possibly damaging |
| A23 | 19 | 9072604   | 9072604   | C    | A   | 131 | 0.10 | <i>MUC16</i>    | NM_024690    | Missense        | p.V4948L   | -0.47  | Neutral     | 0    | Damaging  | 0.001 | benign            |
| A23 | 12 | 124235681 | 124235681 | G    | A   | 57  | 0.44 | <i>ATP6V0A2</i> | NM_012463    | Missense        | p.V654I    | -0.29  | Neutral     | 0.35 | Tolerated | 0     | benign            |
| A23 | 20 | 31023625  | 31023625  | G    | A   | 86  | 0.09 | <i>ASXL1</i>    | NM_015338    | Nonsense        | p.W1037_   | NA     | NA          | 0.46 | Tolerated | NA    | NA                |
| A24 | 7  | 100844060 | 100844060 | C    | T   | 48  | 0.17 | <i>MOGAT3</i>   | NM_178176    | Missense        | p.A26T     | -0.5   | Neutral     | 0.08 | Tolerated | 0.086 | benign            |
| A24 | X  | 41204467  | 41204467  | G    | A   | 121 | 0.09 | <i>DDX3X</i>    | NM_001356    | Missense        | p.D354N    | -4.74  | Deleterious | 0    | Damaging  | 0.999 | probably damaging |
| A24 | 3  | 47142972  | 47142972  | A    | T   | 169 | 0.39 | <i>SETD2</i>    | NM_014159    | Missense        | p.F1664Y   | -2.84  | Deleterious | 0.04 | Damaging  | 1     | probably damaging |
| A24 | 1  | 115258744 | 115258744 | C    | T   | 118 | 0.34 | <i>NRAS</i>     | NM_002524    | Missense        | p.G13D     | -5.48  | Deleterious | 0.03 | Damaging  | 0.434 | benign            |
| A24 | 17 | 46627965  | 46627966  | TC   | T   | 33  | 0.39 | <i>HOXB3</i>    | NM_002146    | Frame_Shift_Del | p.G342fs   | NA     | NA          | NA   | NA        | NA    | NA                |
| A24 | 3  | 9798917   | 9798917   | A    | G   | 112 | 0.39 | <i>OGG1</i>     | NM_016820    | Missense        | p.M380V    | 0.03   | Neutral     | 0.72 | Tolerated | 0.048 | benign            |
| A24 | 14 | 79432666  | 79432666  | G    | T   | 125 | 0.40 | <i>NRXN3</i>    | NM_004796    | Missense        | p.Q525H    | -4.01  | Deleterious | NA   | NA        | 1     | probably damaging |
| A24 | 9  | 119188162 | 119188162 | G    | A   | 71  | 0.31 | <i>ASTN2</i>    | NM_014010    | Nonsense        | p.R1279_   | NA     | NA          | 1    | Tolerated | NA    | NA                |
| A24 | 1  | 13109020  | 13109020  | G    | A   | 16  | 0.75 | <i>PRAMEF5</i>  | NM_001013407 | Missense        | p.R417W    | -3.94  | Deleterious | 0.03 | Damaging  | 1     | probably damaging |
| A24 | 3  | 47155487  | 47155490  | GAGA | G   | 138 | 0.09 | <i>SETD2</i>    | NM_014159    | In_Frame_Del    | p.S1531del | -11.45 | Deleterious | NA   | NA        | NA    | NA                |
| A24 | 3  | 47125756  | 47125756  | A    | AG  | 122 | 0.39 | <i>SETD2</i>    | NM_014159    | Frame_Shift_Ins | p.S1838fs  | NA     | NA          | NA   | NA        | NA    | NA                |
| A24 | 5  | 14492884  | 14492884  | C    | A   | 47  | 0.28 | <i>TRIO</i>     | NM_007118    | Missense        | p.T2614N   | -1.66  | Neutral     | 0.18 | Tolerated | 0.997 | probably damaging |
| A24 | 16 | 19195350  | 19195350  | G    | A   | 112 | 0.39 | <i>SYT17</i>    | NM_016524    | Missense        | p.V278M    | -2.42  | Neutral     | 0    | Damaging  | 0.851 | possibly damaging |
| A24 | 12 | 68708870  | 68708870  | C    | G   | 148 | 0.40 | <i>MDM1</i>     | NM_017440    | Missense        | p.V453L    | -0.38  | Neutral     | NA   | NA        | 0     | benign            |
| A25 | 10 | 64973343  | 64973343  | T    | C   | 113 | 0.50 | <i>JMJD1C</i>   | NM_032776    | Missense        | p.I862V    | -0.34  | Neutral     | 0.09 | Tolerated | 0.995 | probably damaging |
| A25 | 13 | 28608329  | 28608329  | A    | G   | 115 | 0.47 | <i>FLT3</i>     | NM_004119    | Missense        | p.L576P    | -3.81  | Deleterious | 0    | Damaging  | 0.988 | probably damaging |
| A25 | 16 | 3293541   | 3293541   | A    | G   | 150 | 0.42 | <i>MEFV</i>     | NM_000243    | Missense        | p.L649P    | -2.97  | Deleterious | 0.14 | Tolerated | 0.977 | probably damaging |
| A25 | 19 | 608020    | 608020    | G    | C   | 49  | 0.45 | <i>HCN2</i>     | NM_001194    | Missense        | p.M425I    | -3.83  | Deleterious | 0    | Damaging  | 0.774 | possibly damaging |
| A25 | 16 | 57416744  | 57416744  | C    | T   | 64  | 0.44 | <i>CX3CL1</i>   | NM_002996    | Missense        | p.P332S    | -3.1   | Deleterious | 0    | Damaging  | 0.592 | possibly damaging |
| A25 | 3  | 64085424  | 64085424  | T    | G   | 212 | 0.11 | <i>PRICKLE2</i> | NM_198859    | Missense        | p.Q613P    | 0.1    | Neutral     | 0.27 | Tolerated | 0.001 | benign            |
| A25 | 10 | 96466680  | 96466680  | G    | T   | 147 | 0.57 | <i>CYP2C18</i>  | NM_000772    | Missense        | p.R261L    | -5.57  | Deleterious | 0    | Damaging  | 0.978 | probably damaging |
| A25 | 19 | 30054821  | 30054821  | C    | T   | 110 | 0.45 | <i>VSTM2B</i>   | NM_001146339 | Missense        | p.R280C    | -0.51  | Neutral     | 0.06 | Tolerated | 0.733 | possibly damaging |

|     |    |           |           |   |       |     |      |                            |              |                 |           |       |             |      |           |       |                   |
|-----|----|-----------|-----------|---|-------|-----|------|----------------------------|--------------|-----------------|-----------|-------|-------------|------|-----------|-------|-------------------|
| A25 | 3  | 51297638  | 51297638  | C | T     | 126 | 0.50 | <i>DOCK3</i>               | NM_004947    | Nonsense        | p.R746_   | NA    | NA          | 1    | Tolerated | NA    | NA                |
| A25 | 1  | 62516720  | 62516720  | G | T     | 63  | 0.33 | <i>INADL</i>               | NM_176877    | Missense        | p.S1372I  | -0.82 | Neutral     | 0    | Damaging  | 0.911 | possibly damaging |
| A25 | 5  | 131546066 | 131546066 | G | A     | 133 | 0.51 | <i>P4HA2</i>               | NM_004199    | Missense        | p.S207L   | -0.74 | Neutral     | 0.3  | Tolerated | 0     | benign            |
| A25 | 12 | 98926879  | 98926879  | T | A     | 150 | 0.46 | <i>TMPO</i>                | NM_003276    | Missense        | p.S282T   | 0.38  | Neutral     | 0.48 | Tolerated | 0.003 | benign            |
| A25 | 11 | 62678427  | 62678427  | G | A     | 92  | 0.49 | <i>CHRM1</i>               | NM_000738    | Missense        | p.S49F    | -5.35 | Deleterious | 0    | Damaging  | 1     | probably damaging |
| A25 | 19 | 48220126  | 48220126  | C | T     | 40  | 0.55 | <i>EHD2</i>                | NM_014601    | Missense        | p.S86F    | 0.75  | Neutral     | 0.15 | Tolerated | 0.908 | possibly damaging |
| A26 | 15 | 89400204  | 89400204  | C | T     | 46  | 0.15 | <i>ACAN</i>                | NM_013227    | Missense        | p.A1463V  | -1.11 | Neutral     | 0.04 | Damaging  | 0.996 | probably damaging |
| A26 | 15 | 79614332  | 79614332  | T | G     | 58  | 0.17 | <i>TMED3</i>               | NM_007364    | Missense        | p.C144G   | -6.34 | Deleterious | 0    | Damaging  | 0.486 | possibly damaging |
| A26 | 7  | 134719055 | 134719055 | G | A     | 107 | 0.41 | <i>AGBL3</i>               | NM_178563    | Missense        | p.G238D   | -6.87 | Deleterious | 0    | Damaging  | 1     | probably damaging |
| A26 | 22 | 29192125  | 29192125  | C | CTGGA | 38  | 0.18 | <i>XBP1</i>                | NM_005080    | Frame_Shift_Ins | p.L169fs  | NA    | NA          | NA   | NA        | NA    | NA                |
| A27 | 3  | 128516848 | 128516848 | C | T     | 74  | 0.19 | <i>RAB7A</i>               | NM_004637    | Missense        | p.A39V    | -3.46 | Deleterious | 0.01 | Damaging  | 0.997 | probably damaging |
| A27 | 6  | 56336906  | 56336906  | G | A     | 147 | 0.48 | <i>DST</i>                 | NM_001144769 | Missense        | p.A5251V  | -3.31 | Deleterious | 0.09 | Tolerated | 1     | probably damaging |
| A27 | 12 | 112888199 | 112888199 | C | T     | 90  | 0.47 | <i>PTPN11</i>              | NM_002834    | Missense        | p.A72V    | -3.45 | Deleterious | 0    | Damaging  | 0.994 | probably damaging |
| A27 | 18 | 74962746  | 74962746  | A | G     | 7   | 0.57 | <i>GALR1</i>               | NM_001480    | Missense        | p.D81G    | -6.8  | Deleterious | 0    | Damaging  | 1     | probably damaging |
| A27 | X  | 101971349 | 101971349 | G | A     | 110 | 0.53 | <i>ARMCX5-<br/>GPRASP2</i> | NM_001199818 | Missense        | p.E518K   | 0.49  | Neutral     | 0.94 | Tolerated | 0.085 | benign            |
| A27 | 1  | 115258748 | 115258748 | C | T     | 30  | 0.30 | <i>NRAS</i>                | NM_002524    | Missense        | p.G12S    | -4.44 | Deleterious | 0.04 | Damaging  | 0.329 | benign            |
| A27 | 4  | 77192721  | 77192721  | G | A     | 80  | 0.40 | <i>FAM47E</i>              | NM_001136570 | Missense        | p.G224R   | -5.21 | Deleterious | NA   | NA        | 1     | probably damaging |
| A27 | 2  | 198266821 | 198266821 | A | C     | 73  | 0.14 | <i>SF3B1</i>               | NM_012433    | Missense        | p.I704S   | -5.65 | Deleterious | 0.02 | Damaging  | 0.991 | probably damaging |
| A27 | 19 | 42192037  | 42192037  | G | T     | 17  | 0.47 | <i>CEACAM7</i>             | NM_006890    | Missense        | p.L20I    | -1.66 | Neutral     | 0    | Damaging  | 0.999 | probably damaging |
| A27 | 9  | 37020673  | 37020673  | G | A     | 55  | 0.15 | <i>PAX5</i>                | NM_016734    | Missense        | p.L58F    | -3.31 | Deleterious | 0    | Damaging  | 1     | probably damaging |
| A27 | 9  | 37020758  | 37020758  | A | C     | 59  | 0.19 | <i>PAX5</i>                | NM_016734    | Missense        | p.N29K    | -4.76 | Deleterious | 0    | Damaging  | 1     | probably damaging |
| A27 | 3  | 164907867 | 164907867 | G | A     | 87  | 0.52 | <i>SLITRK3</i>             | NM_014926    | Missense        | p.P251L   | -4.01 | Deleterious | 0.02 | Damaging  | 1     | probably damaging |
| A27 | 2  | 25967303  | 25967303  | G | A     | 74  | 0.43 | <i>ASXL2</i>               | NM_018263    | Nonsense        | p.Q635_   | NA    | NA          | 0.17 | Tolerated | NA    | NA                |
| A27 | 2  | 179472662 | 179472662 | G | A     | 154 | 0.11 | <i>TTN</i>                 | NM_001267550 | Missense        | p.R17618C | -5.96 | Deleterious | 0    | Damaging  | 1     | probably damaging |
| A27 | 1  | 186084058 | 186084058 | G | A     | 118 | 0.19 | <i>HMCN1</i>               | NM_031935    | Missense        | p.R3795Q  | -0.78 | Neutral     | 0.62 | Tolerated | 0.999 | probably damaging |
| A27 | 4  | 153247366 | 153247366 | C | T     | 71  | 0.14 | <i>FBXW7</i>               | NM_033632    | Missense        | p.R479Q   | -3.97 | Deleterious | 0.05 | Damaging  | 1     | probably damaging |
| A27 | 7  | 121651640 | 121651640 | C | T     | 82  | 0.48 | <i>PTPRZ1</i>              | NM_002851    | Missense        | p.S847L   | -0.68 | Neutral     | 0.02 | Damaging  | 0.22  | benign            |
| A27 | 9  | 138376741 | 138376741 | G | A     | 20  | 0.45 | <i>PPP1R26</i>             | NM_014811    | Missense        | p.V129M   | -2.83 | Deleterious | 0    | Damaging  | 1     | probably damaging |
| A27 | 10 | 21120227  | 21120227  | G | T     | 53  | 0.43 | <i>NEBL</i>                | NM_006393    | Nonsense        | p.Y523_   | NA    | NA          | 1    | Tolerated | NA    | NA                |
| A28 | 22 | 36863879  | 36863879  | T | A     | 42  | 0.43 | <i>TXN2</i>                | NM_012473    | Missense        | p.E158V   | -4.49 | Deleterious | 0.09 | Tolerated | 0.18  | benign            |
| A28 | 16 | 3080732   | 3080732   | C | T     | 115 | 0.58 | <i>CCDC64B</i>             | NM_001103175 | Missense        | p.E194K   | -1.81 | Neutral     | 0.2  | Tolerated | 0.72  | possibly damaging |
| A28 | 4  | 13543663  | 13543663  | G | A     | 85  | 0.48 | <i>NKX3-2</i>              | NM_001189    | Missense        | p.P319L   | -6.13 | Deleterious | 0    | Damaging  | 1     | probably damaging |

|     |    |           |           |    |                |     |      |                  |              |                 |                     |       |             |      |           |       |                   |
|-----|----|-----------|-----------|----|----------------|-----|------|------------------|--------------|-----------------|---------------------|-------|-------------|------|-----------|-------|-------------------|
| A28 | 7  | 141643732 | 141643732 | G  | A              | 126 | 0.38 | <i>CLEC5A</i>    | NM_013252    | Missense        | p.P58S              | -1.16 | Neutral     | 0.99 | Tolerated | 0.048 | benign            |
| A28 | 22 | 46125421  | 46125421  | A  | T              | 110 | 0.44 | <i>ATXN10</i>    | NM_013236    | Missense        | p.Q282L             | -1.67 | Neutral     | 0.37 | Tolerated | 0.358 | benign            |
| A28 | 4  | 106164914 | 106164914 | G  | A              | 91  | 0.47 | <i>TET2</i>      | NM_001127208 | Missense        | p.R1261H            | -4.6  | Deleterious | 0    | Damaging  | 1     | probably damaging |
| A28 | 8  | 29194671  | 29194671  | G  | A              | 93  | 0.47 | <i>DUSP4</i>     | NM_001394    | Missense        | p.R353W             | -2.04 | Neutral     | 0.04 | Damaging  | 1     | probably damaging |
| A28 | 6  | 38854763  | 38854763  | C  | T              | 73  | 0.10 | <i>DNAH8</i>     | NM_001206927 | Missense        | p.S2819L            | -5.89 | Deleterious | 0.01 | Damaging  | 1     | probably damaging |
| A28 | 17 | 41956732  | 41956732  | C  | T              | 142 | 0.39 | <i>MPP2</i>      | NM_005374    | Missense        | p.V465M             | -2.62 | Deleterious | 0    | Damaging  | 1     | probably damaging |
| A28 | 9  | 140245587 | 140245587 | A  | G              | 63  | 0.41 | <i>EXD3</i>      | NM_017820    | Missense        | p.V466A             | 1.83  | Neutral     | 0.77 | Tolerated | 0     | benign            |
| A29 | 22 | 50961531  | 50961531  | C  | T              | 17  | 0.29 | <i>NCAPH2</i>    | NM_001185011 | Missense        | p.A539V             | -1.98 | Neutral     | 0.22 | Tolerated | 0.992 | probably damaging |
| A29 | 11 | 65314034  | 65314034  | G  | T              | 5   | 0.60 | <i>LTBP3</i>     | NM_001130144 | Missense        | p.D744E             | -3.82 | Deleterious | 0.07 | Tolerated | 1     | probably damaging |
| A29 | 2  | 212812155 | 212812155 | C  | A              | 59  | 0.39 | <i>ERBB4</i>     | NM_005235    | Nonsense        | p.E141_             | NA    | NA          | NA   | NA        | NA    | NA                |
| A29 | 2  | 201334736 | 201334736 | G  | A              | 122 | 0.39 | <i>SPATS2L</i>   | NM_015535    | Missense        | p.E353K             | -2.07 | Neutral     | 0.01 | Damaging  | 0.999 | probably damaging |
| A29 | 1  | 1737942   | 1737942   | A  | T              | 28  | 0.43 | <i>GNB1</i>      | NM_002074    | Missense        | p.I80N              | -5.87 | Deleterious | 0.04 | Damaging  | 1     | probably damaging |
| A29 | 1  | 109778659 | 109778659 | A  | T              | 39  | 0.41 | <i>SARS</i>      | NM_006513    | Missense        | p.M344L             | -2.97 | Deleterious | 0.16 | Tolerated | 1     | probably damaging |
| A29 | 1  | 155449952 | 155449952 | C  | A              | 120 | 0.30 | <i>ASHIL</i>     | NM_018489    | Missense        | p.M903I             | -1.03 | Neutral     | 0.08 | Tolerated | 0.4   | benign            |
| A29 | 13 | 111532374 | 111532375 | CG | C              | 65  | 0.28 | <i>ANKRD10</i>   | NM_017664    | Frame_Shift_Del | p.P291fs            | NA    | NA          | NA   | NA        | NA    | NA                |
| A29 | 8  | 77766148  | 77766148  | C  | G              | 153 | 0.35 | <i>ZFHX4</i>     | NM_024721    | Missense        | p.Q2331E            | -2.69 | Deleterious | 0.01 | Damaging  | 0.979 | probably damaging |
| A29 | 19 | 48832705  | 48832705  | G  | T              | 40  | 0.43 | <i>EMP3</i>      | NM_001425    | Missense        | p.R93L              | -3.94 | Deleterious | 0.01 | Damaging  | 0.979 | probably damaging |
| A29 | 1  | 162731149 | 162731149 | C  | T              | 34  | 0.32 | <i>DDR2</i>      | NM_001014796 | Missense        | p.T335M             | -4.19 | Deleterious | 0.01 | Damaging  | 0.996 | probably damaging |
| A30 | 11 | 118625578 | 118625578 | C  | T              | 67  | 0.27 | <i>DDX6</i>      | NM_001257191 | Missense        | p.G432D             | -6.73 | Deleterious | 0    | Damaging  | 0.982 | probably damaging |
| A30 | 3  | 97167425  | 97167426  | TG | CT             | 82  | 0.46 | <i>EPHA6</i>     | NM_001080448 | Missense        | p.L582P             | -0.85 | Neutral     | NA   | NA        | NA    | NA                |
| A30 | 11 | 16071445  | 16071445  | G  | C              | 55  | 0.47 | <i>SOX6</i>      | NM_001145819 | Missense        | p.P444A             | -4.79 | Deleterious | 0.03 | Damaging  | 0.942 | possibly damaging |
| A30 | 7  | 131982906 | 131982906 | G  | A              | 90  | 0.23 | <i>PLXNA4</i>    | NM_020911    | Missense        | p.R483W             | -5.94 | Deleterious | 0.07 | Tolerated | 1     | probably damaging |
| A30 | 8  | 131916098 | 131916098 | G  | A              | 42  | 0.29 | <i>ADCY8</i>     | NM_001115    | Missense        | p.R611W             | -3.05 | Deleterious | 0.01 | Damaging  | 0.978 | probably damaging |
| A30 | 17 | 80373281  | 80373281  | C  | G              | 120 | 0.71 | <i>OGFOD3</i>    | NM_175902    | Missense        | p.R99S              | -1.91 | Neutral     | 0.1  | Tolerated | 0.049 | benign            |
| A30 | 1  | 21938542  | 21938542  | C  | T              | 80  | 0.15 | <i>RAP1GAP</i>   | NM_001145658 | Missense        | p.V261I             | -0.86 | Neutral     | 0.05 | Damaging  | 0.544 | possibly damaging |
| A30 | 3  | 3186303   | 3186303   | T  | A              | 61  | 0.48 | <i>TRNT1</i>     | NM_182916    | Missense        | p.Y173N             | -6.76 | Deleterious | 0.04 | Damaging  | 0.978 | probably damaging |
| A31 | 7  | 73657513  | 73657513  | G  | GCACCCT<br>CTC | 45  | 0.09 | <i>RFC2</i>      | NM_181471    | In_Frame_Ins    | p.166_167insR<br>GC | -11.9 | Deleterious | NA   | NA        | NA    | NA                |
| A31 | X  | 123697623 | 123697623 | C  | T              | 36  | 0.83 | <i>TENM1</i>     | NM_014253    | Splice Site     | p.A755sp            | NA    | NA          | NA   | NA        | NA    | NA                |
| A31 | 6  | 27776304  | 27776304  | G  | A              | 41  | 0.34 | <i>HIST1H2AI</i> | NM_003509    | Missense        | p.G106D             | -5.63 | Deleterious | 0    | Damaging  | NA    | NA                |
| A31 | 10 | 91178020  | 91178020  | G  | C              | 76  | 0.45 | <i>IFIT5</i>     | NM_012420    | Missense        | p.S355T             | -0.79 | Neutral     | 0.16 | Tolerated | 0.007 | benign            |
| A31 | 15 | 87097719  | 87097719  | G  | A              | 22  | 0.59 | <i>AGBL1</i>     | NM_152336    | Missense        | p.S936N             | -2.51 | Deleterious | 0    | Damaging  | 1     | probably damaging |
| A32 | 18 | 33848646  | 33848647  | TA | T              | 85  | 0.32 | <i>MOCOS</i>     | NM_017947    | Frame_Shift_Del | p_889fs             | NA    | NA          | NA   | NA        | NA    | NA                |

|     |    |           |           |                   |     |     |      |                 |               |                 |              |        |             |      |           |       |                   |
|-----|----|-----------|-----------|-------------------|-----|-----|------|-----------------|---------------|-----------------|--------------|--------|-------------|------|-----------|-------|-------------------|
| A32 | 21 | 28216912  | 28216912  | G                 | A   | 106 | 0.36 | <i>ADAMTS1</i>  | NM_006988     | Missense        | p.A121V      | -1.76  | Neutral     | 0.27 | Tolerated | 0.1   | benign            |
| A32 | 11 | 133779112 | 133779112 | G                 | T   | 103 | 0.31 | <i>IGSF9B</i>   | NM_001277285  | Missense        | p.A1389D     | -3.44  | Deleterious | NA   | NA        | NA    | NA                |
| A32 | 2  | 28631732  | 28631732  | C                 | T   | 73  | 0.33 | <i>FOSL2</i>    | NM_005253     | Missense        | p.A154V      | -2.93  | Deleterious | NA   | NA        | 0.999 | probably damaging |
| A32 | 22 | 23523893  | 23523893  | C                 | G   | 145 | 0.35 | <i>BCR</i>      | NM_004327     | Missense        | p.A249G      | -0.9   | Neutral     | 0.35 | Tolerated | 0.002 | benign            |
| A32 | 14 | 73572645  | 73572657  | GGAGCGAGA<br>GAGA | G   | 73  | 0.37 | <i>RBM25</i>    | NM_021239     | In_Frame_Del    | p.ERER420del | -2.28  | Neutral     | NA   | NA        | NA    | NA                |
| A32 | 20 | 9546721   | 9546721   | G                 | A   | 116 | 0.39 | <i>PAK7</i>     | NM_020341     | Missense        | p.A434V      | -3.91  | Deleterious | NA   | NA        | 0.999 | probably damaging |
| A32 | 15 | 77906423  | 77906423  | G                 | A   | 98  | 0.36 | <i>LINGO1</i>   | NM_032808     | Missense        | p.A609V      | -0.88  | Neutral     | 0.16 | Tolerated | 0.001 | benign            |
| A32 | 18 | 60985722  | 60985722  | C                 | T   | 70  | 0.31 | <i>BCL2</i>     | NM_000633     | Missense        | p.A60T       | -0.54  | Neutral     | 0.95 | Tolerated | 0.442 | benign            |
| A32 | 19 | 43430107  | 43430107  | C                 | A   | 114 | 0.30 | <i>PSG7</i>     | NM_002783     | Missense        | p.C354F      | NA     | NA          | NA   | NA        | NA    | NA                |
| A32 | 14 | 69259602  | 69259604  | GCA               | TCT | 94  | 0.29 | <i>ZFP36L1</i>  | NM_001244701  | Missense        | p.C87R       | -2.49  | Neutral     | NA   | NA        | NA    | NA                |
| A32 | X  | 118716572 | 118716572 | G                 | A   | 96  | 0.13 | <i>UBE2A</i>    | NM_003336     | Missense        | p.C88Y       | -10.76 | Deleterious | 0    | Damaging  | 1     | probably damaging |
| A32 | 1  | 235973226 | 235973226 | C                 | T   | 158 | 0.32 | <i>LYST</i>     | NM_000081     | Missense        | p.D298N      | -1.74  | Neutral     | 0.2  | Tolerated | 0.956 | possibly damaging |
| A32 | 12 | 57496661  | 57496661  | T                 | C   | 126 | 0.19 | <i>STAT6</i>    | NM_001178079  | Missense        | p.D419G      | -4.83  | Deleterious | 0    | Damaging  | 1     | probably damaging |
| A32 | 19 | 50210851  | 50210851  | G                 | A   | 126 | 0.37 | <i>CPT1C</i>    | NM_152359     | Missense        | p.D474N      | -4.54  | Deleterious | 0    | Damaging  | 1     | probably damaging |
| A32 | 20 | 25249801  | 25249801  | G                 | A   | 105 | 0.25 | <i>PYGB</i>     | NM_002862     | Missense        | p.E128K      | -2.96  | Deleterious | 0.24 | Tolerated | 0.433 | benign            |
| A32 | 9  | 130742357 | 130742357 | C                 | G   | 112 | 0.29 | <i>FAM102A</i>  | NM_001035254  | Missense        | p.E20D       | -0.88  | Neutral     | 0.59 | Tolerated | 0.997 | probably damaging |
| A32 | 3  | 180675693 | 180675693 | G                 | A   | 36  | 0.39 | <i>FXR1</i>     | NM_005087     | Missense        | p.E323K      | -3.17  | Deleterious | 0    | Damaging  | 0.998 | probably damaging |
| A32 | 16 | 85954865  | 85954866  | GA                | G   | 146 | 0.29 | <i>IRF8</i>     | NM_002163     | Frame_Shift_Del | p.E420fs     | NA     | NA          | NA   | NA        | NA    | NA                |
| A32 | 19 | 33793152  | 33793152  | C                 | T   | 70  | 0.44 | <i>CEBPA</i>    | NM_004364     | Missense        | p.E57K       | -2.08  | Neutral     | 0.01 | Damaging  | 0.995 | probably damaging |
| A32 | 7  | 12683931  | 12683931  | G                 | A   | 92  | 0.46 | <i>SCIN</i>     | NM_001112706  | Missense        | p.E584K      | -0.42  | Neutral     | 0.34 | Tolerated | 0     | benign            |
| A32 | 3  | 175345130 | 175345130 | G                 | T   | 12  | 0.25 | <i>NAALADL2</i> | NM_207015     | Nonsense        | p.E618_      | NA     | NA          | 1    | Tolerated | NA    | NA                |
| A32 | 1  | 216373452 | 216373452 | A                 | C   | 67  | 0.28 | <i>USH2A</i>    | NM_206933     | Missense        | p.F1110V     | -3.86  | Deleterious | 0.09 | Tolerated | 0.945 | possibly damaging |
| A32 | 1  | 93586164  | 93586164  | T                 | A   | 26  | 0.58 | <i>MTF2</i>     | NM_007358     | Missense        | p.F286I      | -4.45  | Deleterious | 0    | Damaging  | 0.999 | probably damaging |
| A32 | 6  | 37138549  | 37138549  | G                 | A   | 117 | 0.33 | <i>PIM1</i>     | NM_001243186  | Missense        | p.G119D      | -1.3   | Neutral     | NA   | NA        | 0.791 | possibly damaging |
| A32 | 6  | 38548066  | 38548066  | C                 | T   | 83  | 0.29 | <i>BTBD9</i>    | NM_052893     | Missense        | p.G321D      | -5.72  | Deleterious | 0.03 | Damaging  | 1     | probably damaging |
| A32 | 1  | 41949818  | 41949818  | C                 | T   | 49  | 0.33 | <i>EDN2</i>     | NM_001956     | Missense        | p.G41S       | -1.3   | Neutral     | 0.41 | Tolerated | 0.835 | possibly damaging |
| A32 | 14 | 100847382 | 100847382 | G                 | A   | 140 | 0.32 | <i>WDR25</i>    | NM_0011161476 | Missense        | p.G41S       | -0.31  | Neutral     | 0.69 | Tolerated | 0.295 | benign            |
| A32 | 2  | 133542678 | 133542678 | C                 | T   | 150 | 0.32 | <i>NCKAP5</i>   | NM_207363     | Missense        | p.G569D      | -0.84  | Neutral     | 0.02 | Damaging  | 1     | probably damaging |
| A32 | 3  | 5229933   | 5229933   | A                 | G   | 122 | 0.27 | <i>EDEMI</i>    | NM_014674     | Missense        | p.H148R      | -4.14  | Deleterious | 0.02 | Damaging  | 0.752 | possibly damaging |
| A32 | 1  | 22073631  | 22073631  | T                 | C   | 16  | 0.31 | <i>USP48</i>    | NM_032236     | Missense        | p.H307R      | -1.66  | Neutral     | 0.71 | Tolerated | 0.254 | benign            |
| A32 | 14 | 48143806  | 48143806  | T                 | C   | 142 | 0.24 | <i>MDGA2</i>    | NM_001113498  | Missense        | p.H65R       | -0.35  | Neutral     | NA   | NA        | NA    | NA                |
| A32 | 16 | 3817720   | 3817720   | C                 | CT  | 130 | 0.28 | <i>CREBBP</i>   | NM_004380     | Splice Site     | p.I1084sp    | NA     | NA          | NA   | NA        | NA    | NA                |

|     |    |           |           |   |   |     |      |                 |              |             |          |       |             |      |           |       |                   |
|-----|----|-----------|-----------|---|---|-----|------|-----------------|--------------|-------------|----------|-------|-------------|------|-----------|-------|-------------------|
| A32 | 18 | 72176107  | 72176107  | A | T | 81  | 0.33 | <i>CNDP2</i>    | NM_018235    | Nonsense    | p.K134_  | NA    | NA          | 1    | Tolerated | NA    | NA                |
| A32 | X  | 74273416  | 74273416  | T | G | 83  | 0.30 | <i>ABCB7</i>    | NM_004299    | Missense    | p.K684T  | -3.3  | Deleterious | 0.17 | Tolerated | 0.27  | benign            |
| A32 | 2  | 70457886  | 70457886  | A | T | 122 | 0.37 | <i>TIA1</i>     | NM_022173    | Splice Site | p.K74sp  | NA    | NA          | NA   | NA        | NA    | NA                |
| A32 | 10 | 73515163  | 73515163  | A | G | 124 | 0.31 | <i>C10orf54</i> | NM_022153    | Missense    | p.L210P  | -5.21 | Deleterious | 0    | Damaging  | 1     | probably damaging |
| A32 | 6  | 69653877  | 69653877  | C | A | 115 | 0.31 | <i>BAI3</i>     | NM_001704    | Missense    | p.L396I  | -0.53 | Neutral     | 0.11 | Tolerated | 0.828 | possibly damaging |
| A32 | 6  | 134495164 | 134495164 | C | G | 75  | 0.33 | <i>SGK1</i>     | NM_001143676 | Missense    | p.M164I  | -1.19 | Neutral     | 0.22 | Tolerated | 0.054 | benign            |
| A32 | 9  | 6413491   | 6413491   | A | G | 65  | 0.48 | <i>UHRF2</i>    | NM_152896    | Missense    | p.M1V    | -3.06 | Deleterious | 0    | Damaging  | 0.998 | probably damaging |
| A32 | 6  | 37138403  | 37138403  | A | G | 127 | 0.35 | <i>PIMI</i>     | NM_001243186 | Missense    | p.N109D  | 0.36  | Neutral     | 0.76 | Tolerated | 0.115 | benign            |
| A32 | 5  | 131630581 | 131630581 | A | G | 64  | 0.33 | <i>SLC22A4</i>  | NM_003059    | Missense    | p.N91S   | -3.55 | Deleterious | 0.29 | Tolerated | 0.884 | possibly damaging |
| A32 | X  | 3238204   | 3238204   | G | T | 70  | 0.26 | <i>MXRA5</i>    | NM_015419    | Missense    | p.P1841H | -1.93 | Neutral     | 0.19 | Tolerated | 0.028 | benign            |
| A32 | X  | 51638750  | 51638750  | C | A | 142 | 0.24 | <i>MAGED1</i>   | NM_001005333 | Missense    | p.P272Q  | -1.23 | Neutral     | 0.1  | Tolerated | 0.999 | probably damaging |
| A32 | 7  | 82579120  | 82579120  | G | T | 185 | 0.37 | <i>PCLO</i>     | NM_033026    | Missense    | p.P3595H | -8.85 | Deleterious | 0    | Damaging  | 1     | probably damaging |
| A32 | 12 | 123480005 | 123480005 | G | A | 96  | 0.29 | <i>PITPNM2</i>  | NM_020845    | Missense    | p.P662L  | -3.93 | Deleterious | 0.05 | Damaging  | 0.034 | benign            |
| A32 | 6  | 100838287 | 100838287 | G | T | 122 | 0.12 | <i>SIM1</i>     | NM_005068    | Missense    | p.P751T  | 0.27  | Neutral     | 0.38 | Tolerated | 0.099 | benign            |
| A32 | 11 | 1026405   | 1026405   | G | A | 66  | 0.38 | <i>MUC6</i>     | NM_005961    | Missense    | p.P823L  | -4.39 | Deleterious | 0.34 | Tolerated | 0.998 | probably damaging |
| A32 | 3  | 185797652 | 185797652 | G | T | 121 | 0.31 | <i>ETV5</i>     | NM_004454    | Missense    | p.Q202K  | -0.57 | Neutral     | 0.91 | Tolerated | 0.08  | benign            |
| A32 | 1  | 178442279 | 178442279 | C | T | 143 | 0.43 | <i>RASAL2</i>   | NM_170692    | Missense    | p.R1250W | -2.55 | Deleterious | 0    | Damaging  | 1     | probably damaging |
| A32 | 22 | 41634666  | 41634666  | C | T | 84  | 0.30 | <i>CHADL</i>    | NM_138481    | Missense    | p.R137Q  | -0.69 | Neutral     | 0.59 | Tolerated | 0.08  | benign            |
| A32 | 15 | 41137180  | 41137180  | G | A | 159 | 0.36 | <i>SPINT1</i>   | NM_181642    | Missense    | p.R143K  | -0.12 | Neutral     | 0.38 | Tolerated | 0.005 | benign            |
| A32 | 12 | 122261055 | 122261055 | C | T | 88  | 0.30 | <i>SETD1B</i>   | NM_015048    | Nonsense    | p.R1481_ | NA    | NA          | 0.84 | Tolerated | NA    | NA                |
| A32 | 1  | 20517583  | 20517583  | C | T | 151 | 0.38 | <i>UBXN10</i>   | NM_152376    | Nonsense    | p.R177_  | NA    | NA          | 1    | Tolerated | NA    | NA                |
| A32 | 1  | 196434492 | 196434492 | C | T | 20  | 0.35 | <i>KCNT2</i>    | NM_198503    | Missense    | p.R190H  | -3.48 | Deleterious | 0.22 | Tolerated | 0.972 | probably damaging |
| A32 | 3  | 7188191   | 7188191   | G | A | 46  | 0.30 | <i>GRM7</i>     | NM_181874    | Missense    | p.R191H  | -4.41 | Deleterious | 0.01 | Damaging  | 1     | probably damaging |
| A32 | 1  | 181767497 | 181767497 | C | T | 183 | 0.27 | <i>CACNA1E</i>  | NM_001205293 | Missense    | p.R2157W | -6.61 | Deleterious | 0    | Damaging  | 1     | probably damaging |
| A32 | 5  | 176883106 | 176883106 | G | C | 31  | 0.35 | <i>PRR7</i>     | NM_001174101 | Missense    | p.R270T  | -2.6  | Deleterious | NA   | NA        | 0.949 | possibly damaging |
| A32 | 22 | 39709294  | 39709294  | G | A | 78  | 0.35 | <i>RPL3</i>     | NM_000967    | Missense    | p.R357W  | -7.01 | Deleterious | 0.01 | Damaging  | 0.222 | benign            |
| A32 | 1  | 231858322 | 231858322 | G | A | 136 | 0.38 | <i>DISC1</i>    | NM_001012958 | Missense    | p.R362Q  | 0.63  | Neutral     | 0.8  | Tolerated | 0     | benign            |
| A32 | 6  | 56362247  | 56362247  | C | T | 72  | 0.39 | <i>DST</i>      | NM_001144769 | Missense    | p.R4599H | -2.98 | Deleterious | 0.12 | Tolerated | 1     | probably damaging |
| A32 | 6  | 63990011  | 63990011  | C | T | 112 | 0.35 | <i>LGSN</i>     | NM_016571    | Missense    | p.R482Q  | -0.12 | Neutral     | 0.27 | Tolerated | 0.099 | benign            |
| A32 | 20 | 3677876   | 3677876   | G | A | 161 | 0.42 | <i>SIGLECI</i>  | NM_023068    | Nonsense    | p.R746_  | NA    | NA          | 0.84 | Tolerated | NA    | NA                |
| A32 | 1  | 193099338 | 193099338 | G | A | 31  | 0.16 | <i>CDC73</i>    | NM_024529    | Missense    | p.R91Q   | -2.95 | Deleterious | 0    | Damaging  | 1     | probably damaging |
| A32 | 12 | 9875411   | 9875411   | T | G | 29  | 0.41 | <i>CLECL1</i>   | NM_001253750 | Splice Site | p.S105sp | NA    | NA          | NA   | NA        | NA    | NA                |
| A32 | 2  | 11758642  | 11758642  | C | T | 121 | 0.38 | <i>GREB1</i>    | NM_014668    | Missense    | p.S1214L | -1.45 | Neutral     | 0.28 | Tolerated | 0.324 | benign            |

|     |    |           |           |        |    |     |      |                 |              |                 |           |        |             |      |           |       |                   |
|-----|----|-----------|-----------|--------|----|-----|------|-----------------|--------------|-----------------|-----------|--------|-------------|------|-----------|-------|-------------------|
| A32 | 21 | 30316209  | 30316209  | A      | G  | 62  | 0.31 | <i>LTN1</i>     | NM_015565    | Missense        | p.S1380P  | -0.86  | Neutral     | 0.1  | Tolerated | 0.93  | possibly damaging |
| A32 | 8  | 110984939 | 110984939 | C      | A  | 99  | 0.41 | <i>KCNV1</i>    | NM_014379    | Missense        | p.S180I   | -1.51  | Neutral     | 0.02 | Damaging  | 0.984 | probably damaging |
| A32 | 14 | 51288720  | 51288720  | T      | C  | 119 | 0.29 | <i>NIN</i>      | NM_020921    | Missense        | p.S19G    | -3.62  | Deleterious | 0    | Damaging  | 1     | probably damaging |
| A32 | 5  | 158250249 | 158250249 | G      | A  | 126 | 0.31 | <i>EBF1</i>     | NM_024007    | Missense        | p.S238F   | -5.04  | Deleterious | 0    | Damaging  | 0.999 | probably damaging |
| A32 | 9  | 14150160  | 14150160  | A      | G  | 126 | 0.34 | <i>NFIB</i>     | NM_001190737 | Missense        | p.S264P   | 0.87   | Neutral     | 0.47 | Tolerated | 0.985 | probably damaging |
| A32 | X  | 140995349 | 140995349 | C      | A  | 186 | 0.61 | <i>MAGEC1</i>   | NM_005462    | Missense        | p.S720Y   | -0.74  | Neutral     | 0.02 | Damaging  | 0.588 | possibly damaging |
| A32 | 12 | 64609734  | 64609734  | G      | T  | 43  | 0.30 | <i>C12orf66</i> | NM_152440    | Missense        | p.S82Y    | -1.55  | Neutral     | NA   | NA        | 0.997 | probably damaging |
| A32 | 12 | 49440134  | 49440139  | AGTGTG | A  | 117 | 0.39 | <i>MLL2</i>     | NM_003482    | Frame_Shift_Del | p.T1496fs | NA     | NA          | NA   | NA        | NA    | NA                |
| A32 | 11 | 6650025   | 6650025   | G      | A  | 123 | 0.37 | <i>DCHS1</i>    | NM_003737    | Missense        | p.T1733M  | -2.37  | Neutral     | 0.04 | Damaging  | 0.986 | probably damaging |
| A32 | 6  | 41903710  | 41903710  | T      | G  | 74  | 0.35 | <i>CCND3</i>    | NM_001760    | Missense        | p.T283P   | -5.27  | Deleterious | 0.16 | Tolerated | 0.999 | probably damaging |
| A32 | X  | 12994482  | 12994482  | T      | C  | 149 | 0.19 | <i>TMSB4X</i>   | NM_021109    | Splice Site     | p.T34sp   | NA     | NA          | NA   | NA        | NA    | NA                |
| A32 | 15 | 22958189  | 22958189  | C      | T  | 85  | 0.35 | <i>CYFIP1</i>   | NM_014608    | Missense        | p.T611M   | -3.1   | Deleterious | 0.03 | Damaging  | 0.999 | probably damaging |
| A32 | 8  | 128750681 | 128750681 | C      | A  | 146 | 0.40 | <i>MYC</i>      | NM_002467    | Missense        | p.T73N    | -3.65  | Deleterious | 0.01 | Damaging  | 0.997 | probably damaging |
| A32 | 18 | 60985881  | 60985881  | T      | C  | 137 | 0.23 | <i>BCL2</i>     | NM_000633    | Missense        | p.T7A     | -0.54  | Neutral     | 0.27 | Tolerated | 0.148 | benign            |
| A32 | 11 | 1031856   | 1031856   | C      | T  | 160 | 0.33 | <i>MUC6</i>     | NM_005961    | Missense        | p.V105I   | -0.76  | Neutral     | 0.15 | Tolerated | 0.04  | benign            |
| A32 | 6  | 41011793  | 41011793  | G      | A  | 121 | 0.33 | <i>TSPO2</i>    | NM_001010873 | Missense        | p.V144M   | 0.2    | Neutral     | 0.08 | Tolerated | 0.62  | possibly damaging |
| A32 | 4  | 69795760  | 69795760  | A      | T  | 31  | 0.45 | <i>UGT2A3</i>   | NM_024743    | Missense        | p.V452E   | -4.49  | Deleterious | 0    | Damaging  | 0.994 | probably damaging |
| A32 | 1  | 16378855  | 16378855  | T      | C  | 73  | 0.40 | <i>CLCNKB</i>   | NM_000085    | Missense        | p.V524A   | -3.29  | Deleterious | 0    | Damaging  | 0.037 | benign            |
| A32 | 1  | 175324662 | 175324663 | TG     | T  | 137 | 0.41 | <i>TNR</i>      | NM_003285    | Frame_Shift_Del | p.Y1075fs | NA     | NA          | NA   | NA        | NA    | NA                |
| A32 | 1  | 231131518 | 231131518 | A      | G  | 65  | 0.37 | <i>ARV1</i>     | NM_022786    | Missense        | p.Y154C   | -2.38  | Neutral     | 0.07 | Tolerated | 0.975 | probably damaging |
| A32 | 1  | 27106617  | 27106617  | C      | A  | 173 | 0.47 | <i>ARID1A</i>   | NM_006015    | Nonsense        | p.Y2076_  | NA     | NA          | 1    | Tolerated | NA    | NA                |
| A32 | 9  | 37034009  | 37034009  | T      | C  | 28  | 0.21 | <i>PAX5</i>     | NM_016734    | Missense        | p.Y7C     | -0.34  | Neutral     | 0.01 | Damaging  | 0.994 | probably damaging |
| A33 | 19 | 6686229   | 6686229   | G      | T  | 53  | 0.42 | <i>C3</i>       | NM_000064    | Missense        | p.A1239D  | -4.73  | Deleterious | 0.01 | Damaging  | 1     | probably damaging |
| A33 | 17 | 7369097   | 7369097   | A      | G  | 93  | 0.39 | <i>ZBTB4</i>    | NM_001128833 | Missense        | p.C342R   | -11.59 | Deleterious | 0.01 | Damaging  | 0.999 | probably damaging |
| A33 | 18 | 72228148  | 72228148  | G      | A  | 93  | 0.45 | <i>CNDP1</i>    | NM_032649    | Missense        | p.D121N   | -3.77  | Deleterious | 0.08 | Tolerated | 0.267 | benign            |
| A33 | 2  | 48037545  | 48037548  | TATC   | T  | 39  | 0.51 | <i>FBXO11</i>   | NM_025133    | In_Frame_Del    | p.D665del | -11.46 | Deleterious | NA   | NA        | NA    | NA                |
| A33 | 12 | 49431499  | 49431499  | C      | CA | 110 | 0.37 | <i>MLL2</i>     | NM_003482    | Frame_Shift_Ins | p.E3214fs | NA     | NA          | NA   | NA        | NA    | NA                |
| A33 | 16 | 90032347  | 90032347  | G      | T  | 46  | 0.54 | <i>DEF8</i>     | NM_207514    | Missense        | p.E505D   | -0.41  | Neutral     | 0.18 | Tolerated | 0.002 | benign            |
| A33 | 17 | 55193540  | 55193540  | G      | A  | 111 | 0.20 | <i>AKAP1</i>    | NM_003488    | Missense        | p.E784K   | -0.04  | Neutral     | 1    | Tolerated | 0.504 | possibly damaging |
| A33 | 19 | 11141498  | 11141498  | G      | C  | 67  | 0.43 | <i>SMARCA4</i>  | NM_001128849 | Missense        | p.G1159R  | -7.45  | Deleterious | 0    | Damaging  | 1     | probably damaging |
| A33 | 11 | 72539781  | 72539781  | G      | A  | 175 | 0.37 | <i>ATG16L2</i>  | NM_033388    | Missense        | p.G544S   | -3.76  | Deleterious | 0.23 | Tolerated | 1     | probably damaging |
| A33 | 11 | 46568662  | 46568662  | C      | T  | 25  | 0.76 | <i>AMBRA1</i>   | NM_017749    | Splice Site     | p.H126sp  | NA     | NA          | NA   | NA        | NA    | NA                |
| A33 | 1  | 27278212  | 27278212  | A      | T  | 122 | 0.82 | <i>C1orf172</i> | NM_152365    | Missense        | p.H220Q   | -4.11  | Deleterious | 0.28 | Tolerated | 0.077 | benign            |



|     |    |           |           |    |         |     |      |                 |              |                 |          |       |             |      |           |       |                   |
|-----|----|-----------|-----------|----|---------|-----|------|-----------------|--------------|-----------------|----------|-------|-------------|------|-----------|-------|-------------------|
| A33 | 3  | 183515838 | 183515838 | A  | T       | 28  | 0.36 | <i>YEATS2</i>   | NM_018023    | Missense        | p.K1075N | -1.5  | Neutral     | 0.03 | Damaging  | 0.999 | probably damaging |
| A33 | 20 | 3728901   | 3728901   | T  | C       | 80  | 0.43 | <i>HSPA12B</i>  | NM_052970    | Missense        | p.L238P  | -5.46 | Deleterious | 0.17 | Tolerated | 0.997 | probably damaging |
| A33 | 15 | 58247454  | 58247454  | A  | T       | 64  | 0.34 | <i>ALDH1A2</i>  | NM_003888    | Missense        | p.L500M  | -1.63 | Neutral     | 0    | Damaging  | 0.997 | probably damaging |
| A33 | 18 | 18964294  | 18964295  | GT | G       | 107 | 0.36 | <i>GREB1L</i>   | NM_001142966 | Frame_Shift_Del | p.M95fs  | NA    | NA          | NA   | NA        | NA    | NA                |
| A33 | 11 | 372943    | 372943    | C  | T       | 94  | 0.46 | <i>B4GALNT4</i> | NM_178537    | Missense        | p.P147L  | -8.66 | Deleterious | 0    | Damaging  | 1     | probably damaging |
| A33 | 2  | 107459943 | 107459943 | G  | A       | 97  | 0.37 | <i>ST6GAL2</i>  | NM_001142351 | Missense        | p.P164L  | -1.29 | Neutral     | 0.29 | Tolerated | 0.494 | possibly damaging |
| A33 | 3  | 71027097  | 71027098  | TG | T       | 107 | 0.38 | <i>FOXP1</i>    | NM_032682    | Frame_Shift_Del | p.P410fs | NA    | NA          | NA   | NA        | NA    | NA                |
| A33 | 1  | 23885752  | 23885752  | G  | A       | 135 | 0.84 | <i>ID3</i>      | NM_002167    | Missense        | p.P56S   | -7.65 | Deleterious | 0    | Damaging  | 1     | probably damaging |
| A33 | 1  | 70505463  | 70505463  | G  | A       | 63  | 0.81 | <i>LRRC7</i>    | NM_020794    | Missense        | p.R1281K | 0.62  | Neutral     | 1    | Tolerated | 0.1   | benign            |
| A33 | 3  | 51864449  | 51864449  | A  | G       | 36  | 0.47 | <i>IQCF3</i>    | NM_001207023 | Missense        | p.R33G   | -3.1  | Deleterious | 0.46 | Tolerated | 0.675 | possibly damaging |
| A33 | 6  | 160858163 | 160858163 | G  | A       | 101 | 0.40 | <i>SLC22A3</i>  | NM_021977    | Missense        | p.R403H  | -4.72 | Deleterious | 0.18 | Tolerated | 1     | probably damaging |
| A33 | 7  | 30490831  | 30490831  | C  | A       | 49  | 0.37 | <i>NOD1</i>     | NM_006092    | Splice Site     | p.R734sp | NA    | NA          | NA   | NA        | NA    | NA                |
| A33 | 17 | 39991330  | 39991330  | G  | A       | 118 | 0.46 | <i>NT5C3B</i>   | NM_052935    | Missense        | p.R74W   | -5.08 | Deleterious | 0.01 | Damaging  | 1     | probably damaging |
| A33 | 3  | 48459734  | 48459734  | T  | C       | 95  | 0.42 | <i>PLXNB1</i>   | NM_002673    | Missense        | p.S1030G | -3.3  | Deleterious | 0.55 | Tolerated | 0.997 | probably damaging |
| A33 | 2  | 203395598 | 203395598 | G  | T       | 95  | 0.48 | <i>BMPR2</i>    | NM_001204    | Missense        | p.S350I  | -1.64 | Neutral     | 0.04 | Damaging  | 0.688 | possibly damaging |
| A33 | 17 | 79430815  | 79430815  | C  | T       | 33  | 0.70 | <i>BAHCC1</i>   | NM_001080519 | Missense        | p.T2545M | -4.07 | Deleterious | 0    | Damaging  | 1     | probably damaging |
| A33 | 13 | 25671472  | 25671472  | C  | G       | 121 | 0.37 | <i>PABPC3</i>   | NM_030979    | Missense        | p.T379S  | -1.3  | Neutral     | 0.23 | Tolerated | 0.202 | benign            |
| A33 | 8  | 128750681 | 128750681 | C  | T       | 121 | 0.55 | <i>MYC</i>      | NM_002467    | Missense        | p.T73I   | -4.43 | Deleterious | 0    | Damaging  | 0.999 | probably damaging |
| A33 | 1  | 197070259 | 197070259 | A  | T       | 82  | 0.44 | <i>ASPM</i>     | NM_018136    | Missense        | p.Y2708N | -4.97 | Deleterious | 0    | Damaging  | 0.999 | probably damaging |
| A33 | 8  | 24811750  | 24811750  | A  | T       | 133 | 0.37 | <i>NEFL</i>     | NM_006158    | Missense        | p.Y372N  | NA    | NA          | NA   | NA        | NA    | NA                |
| A34 | 17 | 64881235  | 64881235  | G  | A       | 112 | 0.32 | <i>CACNG5</i>   | NM_145811    | Missense        | p.A236T  | -1.03 | Neutral     | 0.2  | Tolerated | 0.725 | possibly damaging |
| A34 | 11 | 113857495 | 113857495 | G  | A       | 141 | 0.47 | <i>HTR3A</i>    | NM_213621    | Missense        | p.A327T  | -0.03 | Neutral     | NA   | NA        | 0.013 | benign            |
| A34 | 12 | 23728630  | 23728630  | G  | A       | 106 | 0.22 | <i>SOX5</i>     | NM_006940    | Missense        | p.A436V  | -1.02 | Neutral     | 0.16 | Tolerated | 0.446 | benign            |
| A34 | 2  | 170063179 | 170063179 | C  | T       | 155 | 0.46 | <i>LRP2</i>     | NM_004525    | Missense        | p.G2351S | -4.34 | Deleterious | 0.08 | Tolerated | 1     | probably damaging |
| A34 | 4  | 91234133  | 91234133  | A  | C       | 126 | 0.25 | <i>CCSER1</i>   | NM_001145065 | Missense        | p.I482L  | 0.18  | Neutral     | 0.24 | Tolerated | 0     | benign            |
| A34 | 20 | 31376701  | 31376701  | G  | T       | 76  | 0.50 | <i>DNMT3B</i>   | NM_006892    | Missense        | p.K232N  | -3.79 | Deleterious | 0.03 | Damaging  | 1     | probably damaging |
| A34 | 18 | 56246069  | 56246069  | G  | A       | 86  | 0.20 | <i>ALPK2</i>    | NM_052947    | Missense        | p.P647S  | -2.75 | Deleterious | 0.3  | Tolerated | 0.441 | benign            |
| A34 | 21 | 36252866  | 36252866  | G  | A       | 84  | 0.42 | <i>RUNX1</i>    | NM_001754    | Nonsense        | p.R166_  | NA    | NA          | 1    | Tolerated | NA    | NA                |
| A34 | 16 | 89595944  | 89595944  | G  | A       | 39  | 0.72 | <i>SPG7</i>     | NM_003119    | Missense        | p.R273H  | -2.75 | Deleterious | 0.01 | Damaging  | 0.999 | probably damaging |
| A34 | 19 | 47193954  | 47193954  | C  | T       | 61  | 0.51 | <i>PRKD2</i>    | NM_016457    | Missense        | p.R571Q  | -3.6  | Deleterious | 0    | Damaging  | 1     | probably damaging |
| A34 | 17 | 73809189  | 73809189  | C  | T       | 109 | 0.52 | <i>UNK</i>      | NM_001080419 | Missense        | p.T218M  | -5.95 | Deleterious | 0    | Damaging  | 1     | probably damaging |
| A35 | 15 | 88679210  | 88679210  | T  | C       | 87  | 0.48 | <i>NTRK3</i>    | NM_001012338 | Missense        | p.E276G  | -1.7  | Neutral     | 0.1  | Tolerated | 0.967 | probably damaging |
| A35 | 15 | 44109639  | 44109639  | A  | AATCTGA | 53  | 0.28 | <i>MFAP1</i>    | NM_005926    | Frame_Shift_Ins | p.I29fs  | NA    | NA          | NA   | NA        | NA    | NA                |

## G

|     |    |           |           |      |               |     |      |                 |              |                 |           |        |             |      |           |       |                   |
|-----|----|-----------|-----------|------|---------------|-----|------|-----------------|--------------|-----------------|-----------|--------|-------------|------|-----------|-------|-------------------|
| A35 | 8  | 100479692 | 100479692 | C    | T             | 135 | 0.33 | <i>VPS13B</i>   | NM_017890    | Missense        | p.L1166F  | -1.41  | Neutral     | 0.03 | Damaging  | 1     | probably damaging |
| A35 | 19 | 51052065  | 51052065  | G    | A             | 25  | 0.40 | <i>LRRC4B</i>   | NM_001080457 | Missense        | p.P11S    | -0.19  | Neutral     | 1    | Tolerated | 0     | benign            |
| A35 | 3  | 151161484 | 151161484 | G    | A             | 99  | 0.11 | <i>IGSF10</i>   | NM_178822    | Missense        | p.R1751C  | -4.86  | Deleterious | NA   | NA        | 0.999 | probably damaging |
| A35 | 21 | 47537830  | 47537830  | C    | T             | 35  | 0.20 | <i>COL6A2</i>   | NM_001849    | Nonsense        | p.R366_   | NA     | NA          | 0.96 | Tolerated | NA    | NA                |
| A35 | 12 | 86373302  | 86373302  | C    | T             | 136 | 0.38 | <i>MGAT4C</i>   | NM_013244    | Missense        | p.R401Q   | -0.77  | Neutral     | 0.1  | Tolerated | 0.994 | probably damaging |
| A35 | 5  | 65466522  | 65466522  | C    | T             | 96  | 0.41 | <i>SREK1</i>    | NM_001077199 | Missense        | p.R411W   | -2.92  | Deleterious | 0    | Damaging  | 0.998 | probably damaging |
| A35 | 10 | 62038620  | 62038620  | G    | T             | 138 | 0.17 | <i>ANK3</i>     | NM_020987    | Missense        | p.T109K   | -5.21  | Deleterious | 0    | Damaging  | 1     | probably damaging |
| A35 | 20 | 47675041  | 47675041  | A    | G             | 40  | 0.45 | <i>CSEIL</i>    | NM_001316    | Missense        | p.Y14C    | -2.82  | Deleterious | 0.37 | Tolerated | 0.037 | benign            |
| A36 | 20 | 15480436  | 15480436  | G    | A             | 133 | 0.24 | <i>MACROD2</i>  | NM_080676    | Missense        | p.A197T   | -3.49  | Deleterious | 0    | Damaging  | 1     | probably damaging |
| A36 | X  | 70604826  | 70604826  | G    | T             | 29  | 0.83 | <i>TAF1</i>     | NM_004606    | Missense        | p.C738F   | 1.85   | Neutral     | 0.74 | Tolerated | 0.002 | benign            |
| A36 | 1  | 33360453  | 33360453  | C    | T             | 49  | 0.41 | <i>TMEM54</i>   | NM_033504    | Missense        | p.G208S   | -1.23  | Neutral     | 0.27 | Tolerated | 0.011 | benign            |
| A36 | 1  | 155874263 | 155874263 | T    | C             | 95  | 0.38 | <i>RIT1</i>     | NM_001256821 | Missense        | p.M107V   | -3.99  | Deleterious | 0.01 | Damaging  | 1     | probably damaging |
| A36 | 11 | 60701149  | 60701149  | C    | T             | 12  | 0.50 | <i>TMEM132A</i> | NM_017870    | Missense        | p.R499C   | -4.75  | Deleterious | 0    | Damaging  | 0.999 | probably damaging |
| A36 | 2  | 237489833 | 237489833 | C    | T             | 100 | 0.31 | <i>CXCR7</i>    | NM_020311    | Missense        | p.S242F   | -3.46  | Deleterious | NA   | NA        | 0.999 | probably damaging |
| A36 | 1  | 237550611 | 237550611 | G    | A             | 68  | 0.22 | <i>RYR2</i>     | NM_001035    | Missense        | p.V203M   | -2.19  | Neutral     | 0    | Damaging  | 0.998 | probably damaging |
| A36 | 2  | 105858943 | 105858943 | G    | A             | 77  | 0.29 | <i>GPR45</i>    | NM_007227    | Missense        | p.V210I   | -0.13  | Neutral     | 0.41 | Tolerated | 0.027 | benign            |
| A36 | 13 | 28609758  | 28609758  | C    | G             | 202 | 0.25 | <i>FLT3</i>     | NM_004119    | Missense        | p.V491L   | -0.39  | Neutral     | 0.87 | Tolerated | 0.792 | possibly damaging |
| A37 | 2  | 143742752 | 143742752 | G    | A             | 151 | 0.10 | <i>KYNU</i>     | NM_003937    | Splice Site     | p.K276sp  | NA     | NA          | NA   | NA        | NA    | NA                |
| A37 | 7  | 107834739 | 107834739 | T    | C             | 134 | 0.11 | <i>NRCAM</i>    | NM_001037132 | Missense        | p.M533V   | -0.64  | Neutral     | 0.2  | Tolerated | 0     | benign            |
| A37 | 12 | 49426603  | 49426606  | TGTT | TGCCAAG<br>GC | 29  | 0.14 | <i>MLL2</i>     | NM_003482    | Frame_Shift_Ins | p.Q3961fs | NA     | NA          | NA   | NA        | NA    | NA                |
| A37 | 9  | 104079717 | 104079717 | G    | A             | 98  | 0.44 | <i>LPPR1</i>    | NM_207299    | Missense        | p.R295H   | -0.67  | Neutral     | 0.16 | Tolerated | 0.999 | probably damaging |
| A37 | 6  | 127796575 | 127796575 | G    | A             | 53  | 0.11 | <i>SOGA3</i>    | NM_001012279 | Missense        | p.R866W   | -4.42  | Deleterious | 0    | Damaging  | 0.999 | probably damaging |
| A37 | 9  | 140611260 | 140611260 | C    | T             | 151 | 0.34 | <i>EHMT1</i>    | NM_024757    | Missense        | p.R90W    | -2.22  | Neutral     | 0.01 | Damaging  | 1     | probably damaging |
| A37 | 2  | 235950156 | 235950156 | C    | T             | 223 | 0.10 | <i>SH3BP4</i>   | NM_014521    | Missense        | p.S248L   | -3.04  | Deleterious | 0    | Damaging  | 1     | probably damaging |
| A37 | 4  | 184240941 | 184240941 | G    | A             | 80  | 0.46 | <i>CLDN22</i>   | NM_001111319 | Missense        | p.T144M   | -2.51  | Deleterious | 0    | Damaging  | 0.99  | probably damaging |
| A37 | 12 | 104728049 | 104728049 | C    | T             | 50  | 0.22 | <i>TXNRD1</i>   | NM_001093771 | Missense        | p.T562M   | -5.14  | Deleterious | 0    | Damaging  | 1     | probably damaging |
| A37 | 2  | 234365952 | 234365952 | G    | C             | 99  | 0.35 | <i>DGKD</i>     | NM_152879    | Missense        | p.W853S   | -11.91 | Deleterious | 0    | Damaging  | 1     | probably damaging |
| A37 | 16 | 3786150   | 3786150   | A    | C             | 107 | 0.12 | <i>CREBBP</i>   | NM_004380    | Missense        | p.Y1539D  | -9.85  | Deleterious | 0    | Damaging  | 1     | probably damaging |
| A38 | X  | 149101984 | 149101984 | A    | T             | 85  | 0.19 | <i>CXorf40B</i> | NM_001013845 | Missense        | p.C37S    | -1.25  | Neutral     | 0.46 | Tolerated | 0.027 | benign            |
| A38 | 12 | 100957258 | 100957258 | C    | A             | 66  | 0.41 | <i>NR1H4</i>    | NM_001206993 | Missense        | p.D484E   | -2.36  | Neutral     | 0.43 | Tolerated | 0.999 | probably damaging |
| A38 | 3  | 97124025  | 97124025  | C    | A             | 53  | 0.28 | <i>EPHA6</i>    | NM_001080448 | Missense        | p.D546E   | 0.14   | Neutral     | 1    | Tolerated | NA    | NA                |

|     |    |           |           |      |             |     |      |                 |              |                 |                   |       |             |      |           |       |                   |
|-----|----|-----------|-----------|------|-------------|-----|------|-----------------|--------------|-----------------|-------------------|-------|-------------|------|-----------|-------|-------------------|
| A38 | 8  | 68084680  | 68084680  | T    | G           | 126 | 0.42 | <i>CSPP1</i>    | NM_024790    | Missense        | p.F948C           | -4.77 | Deleterious | 0    | Damaging  | 1     | probably damaging |
| A38 | 1  | 16054644  | 16054644  | G    | T           | 50  | 0.18 | <i>PLEKHM2</i>  | NM_015164    | Splice Site     | p.K610sp          | NA    | NA          | NA   | NA        | NA    | NA                |
| A38 | 1  | 35656487  | 35656487  | C    | G           | 95  | 0.38 | <i>SFPQ</i>     | NM_005066    | Missense        | p.R376P           | -4.71 | Deleterious | 0    | Damaging  | 0.998 | probably damaging |
| A38 | 15 | 44166570  | 44166570  | C    | T           | 54  | 0.30 | <i>FRMD5</i>    | NM_032892    | Missense        | p.R409Q           | 0.13  | Neutral     | 0.63 | Tolerated | 0.04  | benign            |
| A38 | 17 | 58286756  | 58286756  | C    | T           | 60  | 0.55 | <i>USP32</i>    | NM_032582    | Missense        | p.R858Q           | -3.62 | Deleterious | 0.01 | Damaging  | 0.999 | probably damaging |
| A38 | 2  | 186657538 | 186657538 | C    | T           | 115 | 0.30 | <i>FSIP2</i>    | NM_173651    | Missense        | p.T1981M          | -4.5  | Deleterious | 0.01 | Damaging  | NA    | NA                |
| A38 | 9  | 35703798  | 35703798  | C    | T           | 76  | 0.45 | <i>TLN1</i>     | NM_006289    | Missense        | p.V2111M          | 3.01  | Neutral     | 1    | Tolerated | 0.001 | benign            |
| A38 | 19 | 7684836   | 7684836   | C    | T           | 59  | 0.25 | <i>XAB2</i>     | NM_020196    | Missense        | p.V798M           | -1.96 | Neutral     | 0    | Damaging  | 0.995 | probably damaging |
| A39 | 17 | 7577091   | 7577091   | G    | GGCC        | 91  | 0.29 | <i>TP53</i>     | NM_001126112 | In_Frame_Ins    | p.282_283ins<br>G | -9.45 | Deleterious | NA   | NA        | NA    | NA                |
| A39 | 1  | 120311418 | 120311418 | G    | A           | 63  | 0.30 | <i>HMGCS2</i>   | NM_005518    | Missense        | p.A17V            | -0.07 | Neutral     | 0.55 | Tolerated | 0.001 | benign            |
| A39 | 6  | 66005908  | 66005908  | G    | A           | 206 | 0.46 | <i>EYS</i>      | NM_001142800 | Missense        | p.S624L           | 1.69  | Neutral     | 0.83 | Tolerated | 0     | benign            |
| A39 | 3  | 47161707  | 47161710  | AAAG | AAATAA<br>C | 109 | 0.33 | <i>SETD2</i>    | NM_014159    | In_Frame_Ins    | p.Y1472_          | NA    | NA          | NA   | NA        | NA    | NA                |
| A39 | 13 | 37678498  | 37678498  | G    | A           | 114 | 0.31 | <i>CSNK1A1L</i> | NM_145203    | Missense        | p.T299M           | -3.78 | Deleterious | 0.01 | Damaging  | 0.999 | probably damaging |
| A40 | 18 | 13040879  | 13040882  | CTTA | CTTTT       | 107 | 0.16 | <i>CEP192</i>   | NM_032142    | Frame_Shift_Ins | p.A620fs          | NA    | NA          | NA   | NA        | NA    | NA                |
| A40 | 8  | 145661150 | 145661150 | G    | A           | 100 | 0.19 | <i>TONSL</i>    | NM_013432    | Missense        | p.A889V           | -0.56 | Neutral     | 0.31 | Tolerated | 0.001 | benign            |
| A40 | X  | 32459418  | 32459418  | C    | T           | 64  | 0.17 | <i>DMD</i>      | NM_004006    | Missense        | p.C1267Y          | -5.56 | Deleterious | 0.07 | Tolerated | 0.999 | probably damaging |
| A40 | 4  | 122853599 | 122853599 | A    | T           | 154 | 0.47 | <i>TRPC3</i>    | NM_001130698 | Missense        | p.C272S           | -9.29 | Deleterious | 0    | Damaging  | 1     | probably damaging |
| A40 | 5  | 140530535 | 140530535 | G    | C           | 202 | 0.08 | <i>PCDHB6</i>   | NM_018939    | Missense        | p.D233H           | -6.84 | Deleterious | 0    | Damaging  | 1     | probably damaging |
| A40 | 9  | 118950482 | 118950482 | G    | A           | 35  | 0.34 | <i>PAPPA</i>    | NM_002581    | Missense        | p.D489N           | -2.4  | Neutral     | 0.04 | Damaging  | 0.948 | possibly damaging |
| A40 | 18 | 64197195  | 64197195  | C    | T           | 75  | 0.27 | <i>CDH19</i>    | NM_021153    | Missense        | p.E449K           | 0.3   | Neutral     | 1    | Tolerated | 0.045 | benign            |
| A40 | X  | 99945149  | 99945149  | C    | A           | 170 | 0.24 | <i>SYTL4</i>    | NM_001174068 | Missense        | p.G244V           | -2    | Neutral     | NA   | NA        | 0.122 | benign            |
| A40 | 17 | 67283844  | 67283844  | G    | A           | 200 | 0.34 | <i>ABCA5</i>    | NM_018672    | Missense        | p.H651Y           | -5.5  | Deleterious | NA   | NA        | 0.977 | probably damaging |
| A40 | 10 | 99349736  | 99349736  | A    | G           | 111 | 0.23 | <i>CI0orf62</i> | NM_001009997 | Missense        | p.K28E            | -0.58 | Neutral     | 0.02 | Damaging  | 0.206 | benign            |
| A40 | 19 | 1993065   | 1993065   | A    | G           | 28  | 0.39 | <i>BTBD2</i>    | NM_017797    | Missense        | p.L213P           | -6.05 | Deleterious | 0    | Damaging  | 0.906 | possibly damaging |
| A40 | 1  | 150799085 | 150799085 | T    | G           | 27  | 0.22 | <i>ARNT</i>     | NM_001668    | Missense        | p.L392F           | -3.69 | Deleterious | 0    | Damaging  | 1     | probably damaging |
| A40 | 15 | 93545433  | 93545433  | G    | GA          | 135 | 0.32 | <i>CHD2</i>     | NM_001271    | Frame_Shift_Ins | p.M1388fs         | NA    | NA          | NA   | NA        | NA    | NA                |
| A40 | 13 | 92345759  | 92345760  | TG   | AT          | 100 | 0.28 | <i>GPC5</i>     | NM_004466    | Missense        | p.M215N           | -5.25 | Deleterious | NA   | NA        | NA    | NA                |
| A40 | 6  | 152652142 | 152652142 | T    | G           | 360 | 0.21 | <i>SYNE1</i>    | NM_182961    | Missense        | p.N4560H          | -1.16 | Neutral     | 0.54 | Tolerated | 0.001 | benign            |
| A40 | 4  | 175898609 | 175898609 | A    | C           | 194 | 0.11 | <i>ADAM29</i>   | NM_001130704 | Missense        | p.N645H           | -3.33 | Deleterious | NA   | NA        | 1     | probably damaging |
| A40 | 4  | 1725285   | 1725285   | C    | T           | 122 | 0.29 | <i>TACC3</i>    | NM_006342    | Missense        | p.P46L            | -7.61 | Deleterious | 0    | Damaging  | 1     | probably damaging |
| A40 | 19 | 57286865  | 57286865  | G    | A           | 123 | 0.25 | <i>ZIM2</i>     | NM_001146327 | Nonsense        | p.Q259_           | NA    | NA          | 0.17 | Tolerated | NA    | NA                |

|     |    |           |           |                   |    |     |      |                   |              |                 |             |        |             |      |           |       |                   |
|-----|----|-----------|-----------|-------------------|----|-----|------|-------------------|--------------|-----------------|-------------|--------|-------------|------|-----------|-------|-------------------|
| A40 | 1  | 94461694  | 94461694  | G                 | A  | 97  | 0.29 | <i>ABCA4</i>      | NM_000350    | Nonsense        | p.R2263_    | NA     | NA          | 1    | Tolerated | NA    | NA                |
| A40 | 1  | 163044246 | 163044246 | C                 | T  | 106 | 0.11 | <i>RGS4</i>       | NM_001102445 | Nonsense        | p.R269_     | NA     | NA          | 0.49 | Tolerated | NA    | NA                |
| A40 | 1  | 237586429 | 237586429 | C                 | T  | 170 | 0.21 | <i>RYR2</i>       | NM_001035    | Nonsense        | p.R296_     | NA     | NA          | 1    | Tolerated | NA    | NA                |
| A40 | 3  | 135721683 | 135721683 | G                 | A  | 76  | 0.38 | <i>PPP2R3A</i>    | NM_002718    | Missense        | p.R448K     | 0.18   | Neutral     | 0.59 | Tolerated | 0     | benign            |
| A40 | 2  | 160714940 | 160714940 | T                 | G  | 65  | 0.25 | <i>LY75-CD302</i> | NM_001198759 | Missense        | p.R772S     | -0.88  | Neutral     | 0.65 | Tolerated | 0.837 | possibly damaging |
| A40 | 4  | 152021651 | 152021651 | C                 | T  | 78  | 0.40 | <i>RPS3A</i>      | NM_001006    | Missense        | p.S26F      | -3.21  | Deleterious | 0    | Damaging  | 0.105 | benign            |
| A40 | X  | 47918248  | 47918248  | G                 | A  | 91  | 0.19 | <i>ZNF630</i>     | NM_001037735 | Missense        | p.S528L     | -4.98  | Deleterious | 0.01 | Damaging  | 0.022 | benign            |
| A40 | 1  | 201186484 | 201186484 | C                 | T  | 75  | 0.24 | <i>IGFN1</i>      | NM_001164586 | Missense        | p.T3222I    | -3.44  | Deleterious | 0.23 | Tolerated | 0.55  | possibly damaging |
| A40 | 4  | 87653830  | 87653830  | C                 | T  | 264 | 0.40 | <i>PTPN13</i>     | NM_080685    | Missense        | p.T590I     | 0.56   | Neutral     | 0.96 | Tolerated | 0.041 | benign            |
| A40 | 17 | 74465275  | 74465275  | G                 | A  | 148 | 0.36 | <i>AANAT</i>      | NM_001166579 | Missense        | p.V107I     | -0.42  | Neutral     | 0.23 | Tolerated | 0.001 | benign            |
| A40 | 4  | 26491053  | 26491053  | C                 | T  | 141 | 0.20 | <i>CCKAR</i>      | NM_000730    | Missense        | p.V56M      | -2.11  | Neutral     | 0.19 | Tolerated | 0.801 | possibly damaging |
| A40 | 1  | 248512303 | 248512303 | T                 | C  | 352 | 0.18 | <i>OR14C36</i>    | NM_001001918 | Missense        | p.V76A      | -3.37  | Deleterious | 0.11 | Tolerated | 0.502 | possibly damaging |
| A41 | 12 | 25380282  | 25380282  | G                 | T  | 65  | 0.49 | <i>KRAS</i>       | NM_033360    | Missense        | p.A59E      | -4.71  | Deleterious | 0    | Damaging  | 1     | probably damaging |
| A41 | 1  | 93300428  | 93300440  | TTATGCTGCA<br>GCA | T  | 104 | 0.31 | <i>RPL5</i>       | NM_000969    | In_Frame_Del    | p.YAAA95del | -29.54 | Deleterious | NA   | NA        | NA    | NA                |
| A41 | 19 | 42224844  | 42224844  | G                 | T  | 53  | 0.36 | <i>CEACAM5</i>    | NM_004363    | Missense        | p.G592W     | -1.22  | Neutral     | 0    | Damaging  | 0.998 | probably damaging |
| A41 | 22 | 46614228  | 46614228  | G                 | GA | 97  | 0.55 | <i>PPARA</i>      | NM_005036    | Frame_Shift_Ins | p.Q146fs    | NA     | NA          | NA   | NA        | NA    | NA                |
| A41 | 4  | 59992     | 59992     | C                 | T  | 241 | 0.11 | <i>ZNF718</i>     | NM_001039127 | Nonsense        | p.Q58_      | NA     | NA          | 0.03 | Damaging  | NA    | NA                |
| A41 | 16 | 19126394  | 19126394  | G                 | A  | 51  | 0.57 | <i>ITPRIPL2</i>   | NM_001034841 | Missense        | p.R204H     | 0.26   | Neutral     | 0.46 | Tolerated | 0     | benign            |
| A41 | 11 | 64600152  | 64600152  | G                 | A  | 84  | 0.33 | <i>CDC42BPG</i>   | NM_017525    | Missense        | p.R977C     | -5.33  | Deleterious | 0    | Damaging  | 1     | probably damaging |
| A41 | 21 | 41447089  | 41447089  | G                 | A  | 83  | 0.40 | <i>DSCAM</i>      | NM_001389    | Missense        | p.T1588M    | -0.2   | Neutral     | 0.3  | Tolerated | 0.521 | possibly damaging |
| A41 | 17 | 62850745  | 62850745  | G                 | A  | 36  | 0.36 | <i>LRRC37A3</i>   | NM_199340    | Missense        | p.T1626M    | -1.25  | Neutral     | 0.05 | Damaging  | 0.994 | probably damaging |
| A42 | 15 | 22369012  | 22369012  | C                 | T  | 801 | 0.17 | <i>OR4M2</i>      | NM_001004719 | Missense        | p.A146V     | 0.55   | Neutral     | 1    | Tolerated | 0.016 | benign            |
| A42 | X  | 153763446 | 153763446 | G                 | T  | 39  | 0.51 | <i>G6PD</i>       | NM_000402    | Missense        | p.A171D     | -5.67  | Deleterious | 0    | Damaging  | 1     | probably damaging |
| A42 | 17 | 78164675  | 78164675  | G                 | A  | 55  | 0.40 | <i>CARD14</i>     | NM_024110    | Missense        | p.E356K     | -3.59  | Deleterious | 0.01 | Damaging  | 0.901 | possibly damaging |
| A42 | 1  | 115258747 | 115258747 | C                 | G  | 58  | 0.31 | <i>NRAS</i>       | NM_002524    | Missense        | p.G12A      | -4.62  | Deleterious | 0    | Damaging  | 0.775 | possibly damaging |
| A42 | 10 | 103563716 | 103563722 | ATAATCT           | A  | 110 | 0.40 | <i>MGEA5</i>      | NM_012215    | In_Frame_Del    | p.K1269del  | -15.36 | Deleterious | NA   | NA        | NA    | NA                |
| A42 | 2  | 32735011  | 32735011  | T                 | G  | 61  | 0.43 | <i>BIRC6</i>      | NM_016252    | Missense        | p.L3396R    | -5.58  | Deleterious | 0    | Damaging  | 0.998 | probably damaging |
| A42 | 3  | 129546893 | 129546893 | C                 | T  | 182 | 0.48 | <i>TMCC1</i>      | NM_001017395 | Missense        | p.R110Q     | -0.63  | Neutral     | 0    | Damaging  | 0.034 | benign            |
| A42 | 2  | 85051137  | 85051137  | C                 | T  | 32  | 0.53 | <i>TRABD2A</i>    | NM_001277053 | Missense        | p.R425Q     | -0.97  | Neutral     | 0.03 | Damaging  | 0.681 | possibly damaging |
| A42 | 3  | 69168023  | 69168023  | G                 | A  | 107 | 0.45 | <i>LMOD3</i>      | NM_198271    | Missense        | p.R495C     | -2.13  | Neutral     | 0.04 | Damaging  | 1     | probably damaging |
| A42 | 8  | 74526158  | 74526158  | T                 | C  | 72  | 0.56 | <i>STAU2</i>      | NM_001164380 | Missense        | p.S238G     | -2.65  | Deleterious | 0.1  | Tolerated | 0.735 | possibly damaging |
| A42 | 18 | 61256920  | 61256920  | T                 | A  | 124 | 0.52 | <i>SERPINB13</i>  | NM_012397    | Missense        | p.S66T      | 0.9    | Neutral     | 0.93 | Tolerated | 0     | benign            |

|     |    |           |           |    |    |     |      |                 |              |                 |          |       |             |      |           |       |                   |
|-----|----|-----------|-----------|----|----|-----|------|-----------------|--------------|-----------------|----------|-------|-------------|------|-----------|-------|-------------------|
| A42 | 7  | 105664932 | 105664932 | G  | A  | 78  | 0.41 | <i>CDHR3</i>    | NM_152750    | Missense        | p.V728M  | -0.25 | Neutral     | 0.07 | Tolerated | 0.943 | possibly damaging |
| A43 | 12 | 100811834 | 100811834 | C  | T  | 121 | 0.17 | <i>SLC17A8</i>  | NM_139319    | Missense        | p.A442V  | -3.97 | Deleterious | 0    | Damaging  | 1     | probably damaging |
| A43 | 13 | 28592642  | 28592642  | C  | A  | 50  | 0.24 | <i>FLT3</i>     | NM_004119    | Missense        | p.D835Y  | -8.17 | Deleterious | 0    | Damaging  | 1     | probably damaging |
| A43 | 1  | 3329021   | 3329021   | G  | A  | 109 | 0.42 | <i>PRDM16</i>   | NM_022114    | Missense        | p.E754K  | -1.85 | Neutral     | 0    | Damaging  | 0.997 | probably damaging |
| A43 | X  | 3241049   | 3241049   | C  | T  | 89  | 0.40 | <i>MXRA5</i>    | NM_015419    | Missense        | p.E893K  | -0.79 | Neutral     | 0.7  | Tolerated | 0.98  | probably damaging |
| A43 | 4  | 183601761 | 183601761 | G  | A  | 73  | 0.12 | <i>TENM3</i>    | NM_001080477 | Missense        | p.G569S  | -5.19 | Deleterious | 0    | Damaging  | 0.998 | probably damaging |
| A43 | 18 | 32833809  | 32833809  | T  | G  | 58  | 0.22 | <i>ZSCAN30</i>  | NM_001112734 | Missense        | p.K364Q  | -3.54 | Deleterious | 0.03 | Damaging  | 1     | probably damaging |
| A43 | 1  | 38056339  | 38056339  | T  | C  | 67  | 0.40 | <i>GNL2</i>     | NM_013285    | Missense        | p.M118V  | -0.44 | Neutral     | 0.3  | Tolerated | 0.045 | benign            |
| A43 | 9  | 73152206  | 73152206  | T  | C  | 51  | 0.35 | <i>TRPM3</i>    | NM_001007471 | Missense        | p.M1263V | -0.79 | Neutral     | 0.37 | Tolerated | 0.012 | benign            |
| A43 | 10 | 99640143  | 99640143  | T  | C  | 92  | 0.50 | <i>CRTAC1</i>   | NM_018058    | Missense        | p.N561S  | -0.72 | Neutral     | 0.18 | Tolerated | 0.011 | benign            |
| A43 | 6  | 46761203  | 46761203  | C  | T  | 76  | 0.29 | <i>MEP1A</i>    | NM_005588    | Missense        | p.P23L   | -1.56 | Neutral     | 0.1  | Tolerated | 0.118 | benign            |
| A43 | 7  | 88963668  | 88963668  | C  | T  | 191 | 0.43 | <i>ZNF804B</i>  | NM_181646    | Missense        | p.P458S  | -7.82 | Deleterious | 0.01 | Damaging  | 1     | probably damaging |
| A43 | 1  | 212870325 | 212870326 | TG | T  | 55  | 0.27 | <i>BATF3</i>    | NM_018664    | Frame_Shift_Del | p.Q58fs  | NA    | NA          | NA   | NA        | NA    | NA                |
| A43 | 14 | 68244307  | 68244307  | C  | T  | 17  | 0.35 | <i>ZFYVE26</i>  | NM_015346    | Missense        | p.R1648H | -0.74 | Neutral     | 0.23 | Tolerated | 0.002 | benign            |
| A43 | 20 | 41385239  | 41385239  | C  | T  | 42  | 0.40 | <i>PTPRT</i>    | NM_133170    | Missense        | p.R241H  | -2.45 | Neutral     | 0    | Damaging  | 0.999 | probably damaging |
| A43 | 14 | 69994623  | 69994623  | G  | A  | 62  | 0.56 | <i>PLEKHD1</i>  | NM_001161498 | Missense        | p.R442H  | -1.65 | Neutral     | NA   | NA        | 0.94  | possibly damaging |
| A43 | 6  | 25850392  | 25850392  | G  | T  | 183 | 0.43 | <i>SLC17A3</i>  | NM_001098486 | Missense        | p.S336Y  | -5.89 | Deleterious | 0    | Damaging  | 1     | probably damaging |
| A43 | 1  | 183516320 | 183516320 | C  | G  | 43  | 0.42 | <i>SMG7</i>     | NM_201569    | Missense        | p.S896C  | -1.15 | Neutral     | 0.1  | Tolerated | 0.957 | probably damaging |
| A43 | 1  | 82372828  | 82372828  | C  | T  | 111 | 0.43 | <i>LPHN2</i>    | NM_012302    | Missense        | p.T67M   | -4.57 | Deleterious | 0.01 | Damaging  | 1     | probably damaging |
| A43 | 3  | 184008969 | 184008969 | C  | T  | 64  | 0.28 | <i>ECE2</i>     | NM_014693    | Missense        | p.T777M  | -5.71 | Deleterious | 0    | Damaging  | 1     | probably damaging |
| A43 | 1  | 169694895 | 169694895 | T  | A  | 114 | 0.43 | <i>SELE</i>     | NM_000450    | Missense        | p.Y608F  | -0.37 | Neutral     | 0.69 | Tolerated | 0     | benign            |
| A44 | 6  | 12161939  | 12161939  | C  | T  | 108 | 0.10 | <i>HIVEP1</i>   | NM_002114    | Missense        | p.A2252V | -1.65 | Neutral     | 0.05 | Damaging  | 0.999 | probably damaging |
| A44 | 8  | 75932247  | 75932247  | G  | T  | 114 | 0.58 | <i>CRISPLD1</i> | NM_031461    | Missense        | p.A393S  | -0.06 | Neutral     | 0.73 | Tolerated | 0.976 | probably damaging |
| A44 | 2  | 97507820  | 97507820  | T  | TG | 37  | 0.30 | <i>ANKRD23</i>  | NM_144994    | Frame_Shift_Ins | p.A93fs  | NA    | NA          | NA   | NA        | NA    | NA                |
| A44 | 3  | 42738525  | 42738525  | C  | G  | 86  | 0.45 | <i>HHATL</i>    | NM_020707    | Missense        | p.K326N  | -2.97 | Deleterious | 0.13 | Tolerated | 1     | probably damaging |
| A44 | 12 | 50747660  | 50747660  | C  | G  | 196 | 0.33 | <i>FAM186A</i>  | NM_001145475 | Missense        | p.K985N  | -1.98 | Neutral     | 0.04 | Damaging  | 0.764 | possibly damaging |
| A44 | 2  | 209113113 | 209113113 | G  | A  | 61  | 0.52 | <i>IDH1</i>     | NM_005896    | Missense        | p.R132C  | -6.68 | Deleterious | 0    | Damaging  | 0.259 | benign            |
| A44 | 5  | 169145774 | 169145774 | G  | A  | 251 | 0.49 | <i>DOCK2</i>    | NM_004946    | Missense        | p.R749Q  | -0.77 | Neutral     | 0.68 | Tolerated | 1     | probably damaging |
| A44 | 2  | 25457242  | 25457242  | C  | T  | 35  | 0.69 | <i>DNMT3A</i>   | NM_022552    | Missense        | p.R882H  | -4.72 | Deleterious | 0.03 | Damaging  | 0.651 | possibly damaging |
| A46 | 9  | 13119520  | 13119520  | G  | A  | 251 | 0.47 | <i>MPDZ</i>     | NM_003829    | Missense        | p.A1787V | -1.24 | Neutral     | 0.3  | Tolerated | 1     | probably damaging |
| A46 | 16 | 9857510   | 9857510   | G  | C  | 92  | 0.48 | <i>GRIN2A</i>   | NM_001134407 | Missense        | p.D1297E | -0.9  | Neutral     | NA   | NA        | 0.005 | benign            |
| A46 | 14 | 21360262  | 21360262  | C  | A  | 96  | 0.47 | <i>RNASE3</i>   | NM_002935    | Missense        | p.D139E  | -1.85 | Neutral     | 0.32 | Tolerated | 0     | benign            |
| A46 | 1  | 196694409 | 196694409 | G  | C  | 163 | 0.47 | <i>CFH</i>      | NM_000186    | Missense        | p.D619H  | -0.09 | Neutral     | 0.12 | Tolerated | 0.943 | possibly damaging |

|     |    |           |           |   |   |     |      |                |              |             |          |       |             |      |           |       |                   |
|-----|----|-----------|-----------|---|---|-----|------|----------------|--------------|-------------|----------|-------|-------------|------|-----------|-------|-------------------|
| A46 | X  | 144906057 | 144906057 | A | G | 102 | 0.52 | <i>SLITRK2</i> | NM_032539    | Missense    | p.E705G  | -2.44 | Neutral     | 0.03 | Damaging  | 0.009 | benign            |
| A46 | 9  | 127089677 | 127089677 | G | C | 56  | 0.50 | <i>NEK6</i>    | NM_001145001 | Missense    | p.G226A  | -5.54 | Deleterious | 0    | Damaging  | 1     | probably damaging |
| A46 | 15 | 35274855  | 35274855  | T | G | 25  | 0.52 | <i>ZNF770</i>  | NM_014106    | Missense    | p.N261H  | 0.98  | Neutral     | 0.11 | Tolerated | 0.006 | benign            |
| A46 | 3  | 195513413 | 195513413 | G | A | 14  | 0.14 | <i>MUC4</i>    | NM_018406    | Missense    | p.P1680S | -0.27 | Neutral     | NA   | NA        | 0.544 | possibly damaging |
| A46 | 11 | 6524048   | 6524048   | C | A | 44  | 0.34 | <i>DNHD1</i>   | NM_144666    | Missense    | p.P271H  | -2.01 | Neutral     | 0.07 | Tolerated | 0.122 | benign            |
| A46 | 14 | 73945501  | 73945501  | G | A | 56  | 0.43 | <i>HEATR4</i>  | NM_001220484 | Missense    | p.P964L  | -0.35 | Neutral     | 1    | Tolerated | 0     | benign            |
| A46 | 1  | 78383437  | 78383437  | C | A | 68  | 0.46 | <i>NEXN</i>    | NM_144573    | Missense    | p.Q72K   | -1.14 | Neutral     | 0.06 | Tolerated | 0.033 | benign            |
| A46 | 3  | 48612929  | 48612929  | C | T | 30  | 0.27 | <i>COL7A1</i>  | NM_000094    | Missense    | p.R2008H | -1.64 | Neutral     | 0.12 | Tolerated | 0.995 | probably damaging |
| A46 | 12 | 7864237   | 7864237   | G | A | 79  | 0.15 | <i>DPPA3</i>   | NM_199286    | Missense    | p.R24Q   | 1.38  | Neutral     | 0.62 | Tolerated | 0.017 | benign            |
| A46 | 4  | 156764844 | 156764844 | G | A | 116 | 0.19 | <i>ASIC5</i>   | NM_017419    | Missense    | p.R284C  | -4.13 | Deleterious | 0.03 | Damaging  | 0.995 | probably damaging |
| A46 | 7  | 5338706   | 5338706   | C | T | 16  | 0.69 | <i>SLC29A4</i> | NM_153247    | Missense    | p.R324C  | -2.29 | Neutral     | 0.07 | Tolerated | 1     | probably damaging |
| A46 | 9  | 5078362   | 5078362   | A | T | 46  | 0.09 | <i>JAK2</i>    | NM_004972    | Missense    | p.R683S  | -5.16 | Deleterious | 0    | Damaging  | 1     | probably damaging |
| A46 | 12 | 69085768  | 69085768  | T | G | 92  | 0.17 | <i>NUP107</i>  | NM_020401    | Missense    | p.S108R  | -1.26 | Neutral     | NA   | NA        | 0.495 | possibly damaging |
| A46 | 9  | 5089726   | 5089726   | C | A | 94  | 0.22 | <i>JAK2</i>    | NM_004972    | Missense    | p.T875N  | -4.59 | Deleterious | 0.04 | Damaging  | 0.922 | possibly damaging |
| A46 | 3  | 128348896 | 128348896 | C | T | 54  | 0.39 | <i>RPN1</i>    | NM_002950    | Missense    | p.V312I  | -0.58 | Neutral     | 0.19 | Tolerated | 0.867 | possibly damaging |
| A46 | 20 | 55027281  | 55027281  | A | G | 110 | 0.40 | <i>CASS4</i>   | NM_001164116 | Missense    | p.Y350C  | -8.12 | Deleterious | 0    | Damaging  | 1     | probably damaging |
| A47 | 9  | 135926366 | 135926366 | G | A | 17  | 0.12 | <i>GTF3C5</i>  | NM_001122823 | Splice Site | p.K256sp | NA    | NA          | NA   | NA        | NA    | NA                |
| A47 | 22 | 40066215  | 40066215  | G | A | 18  | 0.61 | <i>CACNA1I</i> | NM_021096    | Missense    | p.R1456H | -4.47 | Deleterious | 0.03 | Damaging  | 1     | probably damaging |
| A47 | 14 | 25102230  | 25102230  | G | A | 47  | 0.34 | <i>GZMB</i>    | NM_004131    | Missense    | p.R32C   | -7    | Deleterious | 0    | Damaging  | 0.977 | probably damaging |
| A47 | 14 | 22038134  | 22038134  | C | T | 58  | 0.33 | <i>OR10G3</i>  | NM_001005465 | Missense    | p.V248M  | -1.82 | Neutral     | 0.03 | Damaging  | 0.243 | benign            |
| A47 | 19 | 17943502  | 17943502  | C | T | 39  | 0.33 | <i>JAK3</i>    | NM_000215    | Missense    | p.V836M  | -2.8  | Deleterious | 0    | Damaging  | 1     | probably damaging |
| A48 | 10 | 94018     | 94018     | T | C | 16  | 0.19 | <i>TUBB8</i>   | NM_177987    | Missense    | p.H105R  | -4.78 | Deleterious | 0    | Damaging  | 0.926 | possibly damaging |
| A48 | 11 | 320606    | 320606    | G | T | 23  | 0.22 | <i>IFITM3</i>  | NM_021034    | Missense    | p.P70T   | 0.65  | Neutral     | 0.4  | Tolerated | 0     | benign            |
| A48 | 9  | 19058075  | 19058075  | C | T | 154 | 0.44 | <i>HAUS6</i>   | NM_017645    | Missense    | p.R897H  | -1.82 | Neutral     | 0.12 | Tolerated | 0.025 | benign            |
| A49 | 5  | 140573648 | 140573648 | C | T | 14  | 0.21 | <i>PCDHB10</i> | NM_018930    | Missense    | p.A508V  | -3.19 | Deleterious | 0.03 | Damaging  | 0.966 | probably damaging |
| A49 | X  | 92927826  | 92927826  | C | T | 47  | 0.70 | <i>NAP1L3</i>  | NM_004538    | Missense    | p.E160K  | -2.99 | Deleterious | 0.09 | Tolerated | 0.573 | possibly damaging |
| A49 | 17 | 80210955  | 80210955  | G | A | 79  | 0.48 | <i>CSNK1D</i>  | NM_001893    | Missense    | p.R168C  | -7.2  | Deleterious | 0.01 | Damaging  | 1     | probably damaging |
| A49 | 11 | 47201086  | 47201086  | G | A | 70  | 0.09 | <i>PACSIN3</i> | NM_001184975 | Missense    | p.R219C  | -4.97 | Deleterious | 0.03 | Damaging  | 1     | probably damaging |
| A49 | X  | 133549136 | 133549136 | C | T | 31  | 0.71 | <i>PHF6</i>    | NM_001015877 | nonsense    | p.R274_  | NA    | NA          | 1    | Tolerated | NA    | NA                |
| A49 | 4  | 367442    | 367442    | C | T | 161 | 0.38 | <i>ZNF141</i>  | NM_003441    | Missense    | p.R406W  | -1.97 | Neutral     | NA   | NA        | 1     | probably damaging |
| A49 | 5  | 52403013  | 52403013  | C | T | 133 | 0.21 | <i>MOCS2</i>   | NM_176806    | Missense    | p.R60H   | 0.63  | Neutral     | 0    | Damaging  | 1     | probably damaging |
| A49 | 20 | 17240946  | 17240946  | G | A | 55  | 0.36 | <i>PCSK2</i>   | NM_002594    | Missense    | p.R80K   | -0.15 | Neutral     | 0.66 | Tolerated | 0     | benign            |
| A49 | 13 | 103398840 | 103398840 | T | C | 184 | 0.16 | <i>CCDC168</i> | NM_001146197 | Missense    | p.T1403A | NA    | NA          | NA   | NA        | NA    | NA                |

|     |    |           |           |    |   |     |      |                |              |                 |           |       |             |      |           |       |                   |
|-----|----|-----------|-----------|----|---|-----|------|----------------|--------------|-----------------|-----------|-------|-------------|------|-----------|-------|-------------------|
| A49 | 16 | 72153863  | 72153863  | G  | A | 76  | 0.14 | <i>PMFBP1</i>  | NM_031293    | Missense        | p.T965M   | -0.39 | Neutral     | 0.07 | Tolerated | 0.216 | benign            |
| A50 | 12 | 23687338  | 23687338  | C  | A | 75  | 0.37 | <i>SOX5</i>    | NM_006940    | nonsense        | p.E703_   | NA    | NA          | 0.02 | Damaging  | NA    | NA                |
| A50 | 6  | 37626117  | 37626117  | C  | G | 78  | 0.50 | <i>MDGA1</i>   | NM_153487    | Missense        | p.E96Q    | -0.66 | Neutral     | 0.55 | Tolerated | 0.998 | probably damaging |
| A50 | 1  | 115258744 | 115258744 | C  | A | 44  | 0.32 | <i>NRAS</i>    | NM_002524    | Missense        | p.G13V    | -7.65 | Deleterious | 0    | Damaging  | 0.998 | probably damaging |
| A50 | 2  | 179582020 | 179582020 | C  | T | 150 | 0.38 | <i>TTN</i>     | NM_001267550 | Missense        | p.G8481R  | -4.35 | Deleterious | 0    | Damaging  | 1     | probably damaging |
| A50 | 2  | 145147550 | 145147550 | T  | C | 118 | 0.53 | <i>ZEB2</i>    | NM_014795    | Missense        | p.H1038R  | -7.28 | Deleterious | 0.08 | Tolerated | 0.992 | probably damaging |
| A50 | 9  | 109694775 | 109694775 | C  | T | 102 | 0.29 | <i>ZNF462</i>  | NM_021224    | Missense        | p.R2021C  | -3.76 | Deleterious | 0.02 | Damaging  | 1     | probably damaging |
| A50 | 17 | 40695147  | 40695147  | C  | T | 88  | 0.45 | <i>NAGLU</i>   | NM_000263    | Missense        | p.R375C   | -1.24 | Neutral     | 0.18 | Tolerated | 0.996 | probably damaging |
| A50 | 11 | 22281108  | 22281108  | G  | A | 191 | 0.49 | <i>ANO5</i>    | NM_213599    | Missense        | p.R484H   | -4.76 | Deleterious | 0    | Damaging  | 1     | probably damaging |
| A50 | 9  | 79634721  | 79634721  | C  | T | 128 | 0.54 | <i>FOXB2</i>   | NM_001013735 | Missense        | p.R51C    | -7.7  | Deleterious | 0    | Damaging  | 1     | probably damaging |
| A50 | 3  | 3072567   | 3072567   | G  | A | 98  | 0.46 | <i>CNTN4</i>   | NM_175607    | Missense        | p.R564Q   | -2.82 | Deleterious | 0.12 | Tolerated | 1     | probably damaging |
| A50 | 11 | 70194471  | 70194471  | G  | A | 91  | 0.46 | <i>PPFIA1</i>  | NM_003626    | Missense        | p.R703Q   | -1.89 | Neutral     | 0.19 | Tolerated | 0.996 | probably damaging |
| A50 | 1  | 176903320 | 176903320 | C  | T | 55  | 0.38 | <i>ASTN1</i>   | NM_004319    | Missense        | p.R880Q   | 0.33  | Neutral     | 1    | Tolerated | 0     | benign            |
| A50 | 2  | 11053417  | 11053417  | G  | A | 68  | 0.44 | <i>KCNF1</i>   | NM_002236    | Missense        | p.V289M   | -2.73 | Deleterious | 0.03 | Damaging  | 0.992 | probably damaging |
| A50 | 19 | 15288380  | 15288380  | G  | T | 56  | 0.36 | <i>NOTCH3</i>  | NM_000435    | nonsense        | p.Y1453_  | NA    | NA          | 0.38 | Tolerated | NA    | NA                |
| A51 | 10 | 50339936  | 50339936  | C  | G | 65  | 0.49 | <i>FAM170B</i> | NM_001164484 | Missense        | p.E192Q   | -0.39 | Neutral     | 0.37 | Tolerated | 0.256 | benign            |
| A51 | 11 | 94759122  | 94759122  | G  | A | 53  | 0.44 | <i>KDM4E</i>   | NM_001161630 | Missense        | p.G134D   | -6.83 | Deleterious | 0    | Damaging  | 1     | probably damaging |
| A51 | 10 | 105823571 | 105823571 | C  | T | 39  | 0.38 | <i>COL17A1</i> | NM_000494    | Missense        | p.G258R   | -3.92 | Deleterious | 0    | Damaging  | 1     | probably damaging |
| A51 | 3  | 195507925 | 195507925 | C  | T | 14  | 0.14 | <i>MUC4</i>    | NM_018406    | Missense        | p.G3509D  | 0.22  | Neutral     | NA   | NA        | 0.003 | benign            |
| A51 | 2  | 145147550 | 145147550 | T  | C | 94  | 0.43 | <i>ZEB2</i>    | NM_014795    | Missense        | p.H1038R  | -7.28 | Deleterious | 0.08 | Tolerated | 0.992 | probably damaging |
| A51 | 2  | 204245097 | 204245097 | A  | C | 42  | 0.50 | <i>ABI2</i>    | NM_005759    | Missense        | p.H151P   | -9.27 | Deleterious | 0    | Damaging  | 1     | probably damaging |
| A51 | 2  | 86509349  | 86509349  | G  | A | 83  | 0.48 | <i>REEP1</i>   | NM_001164730 | Missense        | p.L24F    | -3.93 | Deleterious | 0.05 | Damaging  | 0.999 | probably damaging |
| A51 | 12 | 3018711   | 3018711   | A  | G | 98  | 0.51 | <i>TULP3</i>   | NM_001160408 | Missense        | p.M20V    | -0.6  | Neutral     | 0.44 | Tolerated | 0.178 | benign            |
| A51 | 9  | 37015165  | 37015165  | G  | C | 34  | 1.00 | <i>PAX5</i>    | NM_016734    | Missense        | p.P80R    | -7.7  | Deleterious | 0    | Damaging  | 1     | probably damaging |
| A51 | 14 | 104642791 | 104642792 | TG | T | 54  | 0.50 | <i>KIF26A</i>  | NM_015656    | Frame_Shift_Del | p.R1222fs | NA    | NA          | NA   | NA        | NA    | NA                |
| A51 | 3  | 10970960  | 10970960  | C  | T | 74  | 0.39 | <i>SLC6A11</i> | NM_014229    | Missense        | p.R436W   | -7.19 | Deleterious | 0    | Damaging  | 1     | probably damaging |
| A51 | 15 | 65621883  | 65621883  | G  | A | 50  | 0.42 | <i>IGDCC3</i>  | NM_004884    | Missense        | p.R684W   | -1.34 | Neutral     | 0.04 | Damaging  | 0.996 | probably damaging |
| A51 | 11 | 4703421   | 4703421   | G  | A | 70  | 0.44 | <i>OR51E2</i>  | NM_030774    | Missense        | p.S174L   | -3.5  | Deleterious | 0.3  | Tolerated | 0.839 | possibly damaging |
| A51 | 13 | 103053922 | 103053922 | G  | A | 132 | 0.38 | <i>FGF14</i>   | NM_175929    | Missense        | p.S36L    | -1.35 | Neutral     | 0.09 | Tolerated | 0.997 | probably damaging |
| A51 | 15 | 69325561  | 69325561  | G  | A | 60  | 0.48 | <i>NOX5</i>    | NM_024505    | Missense        | p.V267I   | -0.07 | Neutral     | 0.84 | Tolerated | 0.002 | benign            |
| A52 | 1  | 36554587  | 36554587  | G  | C | 43  | 0.47 | <i>ADPRHL2</i> | NM_017825    | Missense        | p.A28P    | -2.02 | Neutral     | 0.01 | Damaging  | 0.999 | probably damaging |
| A52 | 13 | 28592629  | 28592629  | T  | C | 96  | 0.30 | <i>FLT3</i>    | NM_004119    | Missense        | p.D839G   | -6.36 | Deleterious | 0.04 | Damaging  | 0.827 | possibly damaging |
| A52 | 9  | 133589796 | 133589796 | A  | C | 154 | 0.36 | <i>ABL1</i>    | NM_007313    | Missense        | p.E30D    | -0.13 | Neutral     | 0.53 | Tolerated | 0     | benign            |

|     |    |           |           |   |        |     |      |                 |              |                 |          |       |             |      |           |       |                   |
|-----|----|-----------|-----------|---|--------|-----|------|-----------------|--------------|-----------------|----------|-------|-------------|------|-----------|-------|-------------------|
| A52 | 12 | 25398284  | 25398284  | C | T      | 99  | 0.08 | <i>KRAS</i>     | NM_033360    | Missense        | p.G12D   | -5.37 | Deleterious | 0    | Damaging  | 0.517 | possibly damaging |
| A52 | 12 | 112926887 | 112926887 | G | C      | 49  | 0.27 | <i>PTPN11</i>   | NM_002834    | Missense        | p.G503R  | -7.26 | Deleterious | 0.01 | Damaging  | 1     | probably damaging |
| A52 | 16 | 1306971   | 1306971   | A | G      | 18  | 0.39 | <i>TPSD1</i>    | NM_012217    | Missense        | p.H143R  | -3.36 | Deleterious | 0.28 | Tolerated | 0.003 | benign            |
| A52 | 19 | 35941582  | 35941582  | G | A      | 49  | 0.45 | <i>FFAR2</i>    | NM_005306    | Missense        | p.M322I  | 0.2   | Neutral     | 0.42 | Tolerated | 0.002 | benign            |
| A52 | 9  | 37015165  | 37015165  | G | C      | 19  | 0.84 | <i>PAX5</i>     | NM_016734    | Missense        | p.P80R   | -7.7  | Deleterious | 0    | Damaging  | 1     | probably damaging |
| A52 | 19 | 6678454   | 6678454   | C | T      | 44  | 0.39 | <i>C3</i>       | NM_000064    | Missense        | p.R1548Q | -1.3  | Neutral     | 0.18 | Tolerated | 0.271 | benign            |
| A52 | X  | 26157898  | 26157898  | C | T      | 43  | 0.84 | <i>MAGEB18</i>  | NM_173699    | Missense        | p.R266C  | -2.1  | Neutral     | 0.39 | Tolerated | 0.056 | benign            |
| A52 | 17 | 2908678   | 2908678   | C | T      | 76  | 0.18 | <i>RAP1GAP2</i> | NM_015085    | Missense        | p.R406W  | -7.49 | Deleterious | 0    | Damaging  | 1     | probably damaging |
| A52 | 12 | 50037934  | 50037934  | C | T      | 61  | 0.23 | <i>PRPF40B</i>  | NM_001031698 | Missense        | p.R880W  | -4.4  | Deleterious | 0    | Damaging  | 0.999 | probably damaging |
| A52 | 6  | 72962473  | 72962473  | G | A      | 69  | 0.32 | <i>RIMS1</i>    | NM_014989    | Missense        | p.R903Q  | -3.49 | Deleterious | 0.01 | Damaging  | 1     | probably damaging |
| A52 | 4  | 56730536  | 56730536  | C | A      | 16  | 0.19 | <i>EXOC1</i>    | NM_001024924 | Missense        | p.S133R  | -1.34 | Neutral     | 0.33 | Tolerated | 0.673 | possibly damaging |
| A52 | 11 | 28352252  | 28352252  | C | T      | 74  | 0.28 | <i>METTL15</i>  | NM_001113528 | Missense        | p.T363M  | -0.11 | Neutral     | NA   | NA        | 0.016 | benign            |
| A52 | 17 | 33738775  | 33738775  | A | G      | 166 | 0.27 | <i>SLFN12</i>   | NM_018042    | Missense        | p.V440A  | -3.43 | Deleterious | 0.06 | Tolerated | 0.999 | probably damaging |
| A52 | 1  | 93300403  | 93300403  | A | AGCCCC | 77  | 0.31 | <i>RPL5</i>     | NM_000969    | Frame_Shift_Ins | p.Y86fs  | NA    | NA          | NA   | NA        | NA    | NA                |
| A53 | 10 | 5416147   | 5416147   | C | T      | 21  | 0.33 | <i>UCN3</i>     | NM_053049    | Missense        | p.A155V  | -4    | Deleterious | 0    | Damaging  | 1     | probably damaging |
| A53 | 15 | 24921247  | 24921247  | C | T      | 36  | 0.25 | <i>NPAP1</i>    | NM_018958    | Missense        | p.A78V   | -1.02 | Neutral     | 0.31 | Tolerated | 0.324 | benign            |
| A53 | 7  | 31008756  | 31008756  | A | G      | 16  | 0.44 | <i>GHRHR</i>    | NM_000823    | Missense        | p.D80G   | -1.65 | Neutral     | 0.27 | Tolerated | 0.002 | benign            |
| A53 | X  | 9905397   | 9905397   | G | A      | 97  | 0.34 | <i>SHROOM2</i>  | NM_001649    | Missense        | p.E1271K | -2.15 | Neutral     | 0.04 | Damaging  | 0.999 | probably damaging |
| A53 | 7  | 150820924 | 150820924 | A | G      | 45  | 0.33 | <i>AGAP3</i>    | NM_031946    | Missense        | p.E391G  | -3.23 | Deleterious | 0.11 | Tolerated | 0.11  | benign            |
| A53 | 3  | 195497223 | 195497223 | C | T      | 52  | 0.25 | <i>MUC4</i>     | NM_018406    | Missense        | p.G4421D | -0.07 | Neutral     | 0.68 | Tolerated | 0.033 | benign            |
| A53 | 10 | 116698249 | 116698249 | G | GC     | 56  | 0.25 | <i>TRUB1</i>    | NM_139169    | Frame_Shift_Ins | p.G79fs  | NA    | NA          | NA   | NA        | NA    | NA                |
| A53 | 3  | 47059130  | 47059130  | T | G      | 47  | 0.28 | <i>SETD2</i>    | NM_014159    | Missense        | p.K2511Q | -3.55 | Deleterious | 0    | Damaging  | 0.999 | probably damaging |
| A53 | 3  | 195509756 | 195509756 | G | C      | 18  | 0.17 | <i>MUC4</i>     | NM_018406    | Missense        | p.L2899V | 0.12  | Neutral     | NA   | NA        | 0.034 | benign            |
| A53 | 16 | 87790069  | 87790069  | A | T      | 41  | 0.41 | <i>KLHDC4</i>   | NM_017566    | Missense        | p.L69H   | -5.55 | Deleterious | 0.19 | Tolerated | 1     | probably damaging |
| A53 | 16 | 48290541  | 48290541  | G | T      | 110 | 0.32 | <i>LONP2</i>    | NM_031490    | Missense        | p.M163I  | -1.16 | Neutral     | 0.15 | Tolerated | 0.003 | benign            |
| A53 | 3  | 195513413 | 195513413 | G | A      | 16  | 0.25 | <i>MUC4</i>     | NM_018406    | Missense        | p.P1680S | -0.27 | Neutral     | NA   | NA        | 0.544 | possibly damaging |
| A53 | 3  | 148558742 | 148558742 | C | T      | 71  | 0.27 | <i>CPB1</i>     | NM_001871    | Missense        | p.R152C  | -6.51 | Deleterious | 0    | Damaging  | 1     | probably damaging |
| A53 | 9  | 115759981 | 115759981 | G | A      | 97  | 0.26 | <i>ZNF883</i>   | NM_001101338 | Missense        | p.R187W  | NA    | NA          | NA   | NA        | NA    | NA                |
| A53 | 1  | 38227313  | 38227313  | C | T      | 49  | 0.24 | <i>EPHA10</i>   | NM_001099439 | Missense        | p.R205H  | -3.69 | Deleterious | 0.01 | Damaging  | 1     | probably damaging |
| A53 | 12 | 6936088   | 6936088   | C | T      | 118 | 0.28 | <i>GPR162</i>   | NM_019858    | Missense        | p.R496W  | 0.1   | Neutral     | 0.03 | Damaging  | 0.996 | probably damaging |
| A53 | 1  | 155753776 | 155753776 | C | T      | 64  | 0.28 | <i>GON4L</i>    | NM_001037533 | Splice Site     | p.R631sp | NA    | NA          | NA   | NA        | NA    | NA                |
| A53 | 7  | 100687041 | 100687041 | C | T      | 90  | 0.28 | <i>MUC17</i>    | NM_001040105 | Missense        | p.T4115M | -0.98 | Neutral     | 0.12 | Tolerated | 0.521 | possibly damaging |
| A53 | 9  | 37020768  | 37020768  | A | C      | 48  | 0.48 | <i>PAX5</i>     | NM_016734    | Missense        | p.V26G   | -4.49 | Deleterious | 0    | Damaging  | 1     | probably damaging |



|     |    |           |           |   |                                       |     |      |                 |              |                 |                       |       |             |      |           |       |                   |
|-----|----|-----------|-----------|---|---------------------------------------|-----|------|-----------------|--------------|-----------------|-----------------------|-------|-------------|------|-----------|-------|-------------------|
| A53 | 5  | 35873646  | 35873646  | A | G                                     | 131 | 0.35 | <i>IL7R</i>     | NM_002185    | Missense        | p.Y201C               | -8.56 | Deleterious | 0    | Damaging  | 1     | probably damaging |
| A53 | 9  | 99581577  | 99581577  | T | TCCCC                                 | 76  | 0.25 | <i>ZNF782</i>   | NM_001001662 | Frame_Shift_Ins | p.Y243fs              | NA    | NA          | NA   | NA        | NA    | NA                |
| A54 | 12 | 49415864  | 49415864  | T | TGAG                                  | 45  | 0.40 | <i>MLL2</i>     | NM_003482    | In_Frame_Ins    | p.5494_5495ins<br>sL  | -9.04 | Deleterious | NA   | NA        | NA    | NA                |
| A54 | 4  | 7776519   | 7776519   | G | A                                     | 35  | 0.23 | <i>AFAP1</i>    | NM_001134647 | Missense        | p.A670V               | -0.73 | Neutral     | 0.61 | Tolerated | 0.999 | probably damaging |
| A54 | 9  | 21968243  | 21968243  | T | G                                     | 12  | 0.67 | <i>CDKN2A</i>   | NM_001195132 | Splice Site     | p.D153sp              | NA    | NA          | NA   | NA        | NA    | NA                |
| A54 | 11 | 93417292  | 93417292  | A | T                                     | 67  | 0.30 | <i>KIAA1731</i> | NM_033395    | Missense        | p.D371V               | -3.83 | Deleterious | 0.07 | Tolerated | 0.102 | benign            |
| A54 | 3  | 98216555  | 98216555  | G | C                                     | 84  | 0.42 | <i>OR5K2</i>    | NM_001004737 | Missense        | p.E11Q                | -2.32 | Neutral     | 0.02 | Damaging  | 0.303 | benign            |
| A54 | 19 | 1622324   | 1622324   | A | AG                                    | 30  | 0.63 | <i>TCF3</i>     | NM_003200    | Frame_Shift_Ins | p.F214fs              | NA    | NA          | NA   | NA        | NA    | NA                |
| A54 | 8  | 128750684 | 128750684 | C | A                                     | 70  | 0.24 | <i>MYC</i>      | NM_002467    | Missense        | p.P74Q                | -6.31 | Deleterious | 0    | Damaging  | 1     | probably damaging |
| A54 | 19 | 43382086  | 43382086  | G | A                                     | 87  | 0.54 | <i>PSG1</i>     | NM_006905    | Missense        | p.R137C               | -1.79 | Neutral     | 0.03 | Damaging  | 0.967 | probably damaging |
| A54 | 13 | 23911374  | 23911374  | C | T                                     | 115 | 0.32 | <i>SACS</i>     | NM_014363    | Missense        | p.R2214H              | -0.14 | Neutral     | 0.01 | Damaging  | 0.389 | benign            |
| A54 | 12 | 65134449  | 65134449  | C | T                                     | 49  | 0.47 | <i>GNS</i>      | NM_002076    | Missense        | p.R271K               | -1.86 | Neutral     | NA   | NA        | 1     | probably damaging |
| A54 | 7  | 158663888 | 158663888 | G | A                                     | 50  | 0.50 | <i>WDR60</i>    | NM_018051    | Missense        | p.R42H                | -0.09 | Neutral     | 0.41 | Tolerated | 0.001 | benign            |
| A54 | 14 | 20404090  | 20404090  | C | T                                     | 367 | 0.23 | <i>OR4K1</i>    | NM_001004063 | Missense        | p.R89C                | -3.46 | Deleterious | 0.12 | Tolerated | 0.001 | benign            |
| A54 | X  | 153940920 | 153940920 | G | C                                     | 29  | 0.34 | <i>GAB3</i>     | NM_001081573 | nonsense        | p.S218_               | NA    | NA          | 0.06 | Tolerated | NA    | NA                |
| A54 | 11 | 77103484  | 77103484  | T | C                                     | 40  | 0.60 | <i>PAK1</i>     | NM_001128620 | Missense        | p.S28G                | -0.38 | Neutral     | 0.68 | Tolerated | 0     | benign            |
| A54 | 1  | 182555100 | 182555100 | A | G                                     | 48  | 0.23 | <i>RNASEL</i>   | NM_021133    | Missense        | p.V281A               | -0.43 | Neutral     | 0.53 | Tolerated | 0.972 | probably damaging |
| A55 | 16 | 90095597  | 90095597  | T | TGGGGC<br>AGCCTAC<br>GGGGCA<br>GGCTGC | 51  | 0.24 | <i>C16orf3</i>  | NM_001214    | In_Frame_Ins    | p.51_52insAA<br>CPVGC | 11    | Neutral     | NA   | NA        | NA    | NA                |
| A55 | 11 | 65146930  | 65146930  | C | T                                     | 111 | 0.37 | <i>SLC25A45</i> | NM_182556    | Missense        | p.A86T                | -0.53 | Neutral     | 0.41 | Tolerated | 0.061 | benign            |
| A55 | 3  | 137749921 | 137749921 | G | C                                     | 50  | 0.30 | <i>CLDN18</i>   | NM_001002026 | Missense        | p.D242H               | -0.18 | Neutral     | 0.25 | Tolerated | 0.664 | possibly damaging |
| A55 | 5  | 82835717  | 82835717  | G | T                                     | 103 | 0.52 | <i>VCAN</i>     | NM_004385    | nonsense        | p.E2299_              | NA    | NA          | 0.71 | Tolerated | NA    | NA                |
| A55 | 13 | 76419512  | 76419512  | A | G                                     | 44  | 0.48 | <i>LMO7</i>     | NM_015842    | Missense        | p.N1150D              | -2.97 | Deleterious | 0.02 | Damaging  | 0.974 | probably damaging |
| A55 | 19 | 1037781   | 1037781   | C | A                                     | 21  | 0.19 | <i>CNN2</i>     | NM_004368    | Missense        | p.P271H               | -4.44 | Deleterious | 0    | Damaging  | 0.999 | probably damaging |
| A55 | 1  | 115256530 | 115256530 | G | T                                     | 142 | 0.35 | <i>NRAS</i>     | NM_002524    | Missense        | p.Q61K                | -3.38 | Deleterious | 0.03 | Damaging  | 0.948 | possibly damaging |
| A55 | 11 | 61607827  | 61607827  | C | T                                     | 26  | 0.42 | <i>FADS2</i>    | NM_004265    | Missense        | p.R114W               | -5.39 | Deleterious | 0    | Damaging  | 0.999 | probably damaging |
| A55 | 19 | 39964709  | 39964709  | T | C                                     | 46  | 0.40 | <i>SUPT5H</i>   | NM_001111020 | Missense        | p.S867P               | -0.78 | Neutral     | NA   | NA        | 0.036 | benign            |
| A55 | 3  | 75713618  | 75713618  | A | T                                     | 19  | 0.21 | <i>FRG2C</i>    | NM_001124759 | Missense        | p.T30S                | -0.84 | Neutral     | 0.13 | Tolerated | 0     | benign            |
| A56 | 22 | 45740439  | 45740439  | A | G                                     | 54  | 0.46 | <i>SMC1B</i>    | NM_148674    | Missense        | p._1236Q              | NA    | NA          | NA   | NA        | NA    | NA                |
| A56 | 1  | 249106236 | 249106236 | C | T                                     | 31  | 0.39 | <i>SH3BP5L</i>  | NM_030645    | Missense        | p.D349N               | -1.52 | Neutral     | 0.08 | Tolerated | 1     | probably damaging |

|     |    |           |           |   |   |     |      |                 |              |              |                     |       |             |      |           |       |                   |
|-----|----|-----------|-----------|---|---|-----|------|-----------------|--------------|--------------|---------------------|-------|-------------|------|-----------|-------|-------------------|
| A56 | 19 | 42824472  | 42824472  | C | A | 52  | 0.50 | <i>TMEM145</i>  | NM_173633    | Missense     | p.F359L             | -5.3  | Deleterious | 0.1  | Tolerated | 0.997 | probably damaging |
| A56 | 3  | 64085328  | 64085328  | A | G | 101 | 0.38 | <i>PRICKLE2</i> | NM_198859    | Missense     | p.F645S             | -0.41 | Neutral     | 0.18 | Tolerated | 0.09  | benign            |
| A56 | 4  | 77134668  | 77134668  | C | T | 46  | 0.35 | <i>SCARB2</i>   | NM_005506    | Missense     | p.G10E              | -4.81 | Deleterious | 0.02 | Damaging  | 1     | probably damaging |
| A56 | 6  | 109484040 | 109484040 | A | G | 38  | 0.45 | <i>CEP57L1</i>  | NM_001083535 | Missense     | p.K417R             | -1.52 | Neutral     | 0.21 | Tolerated | 0.021 | benign            |
| A56 | 6  | 155635525 | 155635525 | G | A | 28  | 0.50 | <i>TFBIM</i>    | NM_016020    | Missense     | p.P13L              | -9.16 | Deleterious | 0    | Damaging  | 0.997 | probably damaging |
| A56 | 19 | 1529818   | 1529818   | C | T | 36  | 0.39 | <i>PLK5</i>     | NM_001243079 | Missense     | p.P188L             | NA    | NA          | NA   | NA        | NA    | NA                |
| A56 | 7  | 50450244  | 50450244  | G | A | 23  | 0.87 | <i>IKZF1</i>    | NM_006060    | Missense     | p.R143Q             | -3.45 | Deleterious | 0    | Damaging  | 1     | probably damaging |
| A56 | 21 | 41137635  | 41137635  | C | T | 73  | 0.44 | <i>IGSF5</i>    | NM_001080444 | Missense     | p.R92C              | -6.77 | Deleterious | 0    | Damaging  | 1     | probably damaging |
| A56 | 16 | 83636135  | 83636135  | C | T | 67  | 0.46 | <i>CDH13</i>    | NM_001220488 | Missense     | p.T393M             | -5.09 | Deleterious | 0    | Damaging  | 1     | probably damaging |
| A56 | 5  | 135583358 | 135583358 | C | T | 68  | 0.47 | <i>TRPC7</i>    | NM_020389    | Missense     | p.V549M             | -2.82 | Deleterious | 0.16 | Tolerated | 1     | probably damaging |
| A57 | X  | 51075851  | 51075851  | G | A | 83  | 0.41 | <i>NUDT10</i>   | NM_153183    | Missense     | p.D12N              | -3.76 | Deleterious | 0.02 | Damaging  | 0.995 | probably damaging |
| A57 | 10 | 29762792  | 29762792  | T | A | 26  | 0.38 | <i>SVIL</i>     | NM_021738    | Missense     | p.E1835V            | -6.04 | Deleterious | 0.01 | Damaging  | 0.978 | probably damaging |
| A57 | 19 | 48183560  | 48183560  | T | C | 65  | 0.38 | <i>GLTSCR1</i>  | NM_015711    | Missense     | p.L378P             | -2.8  | Deleterious | 0.09 | Tolerated | 1     | probably damaging |
| A57 | 4  | 9784642   | 9784642   | C | T | 39  | 0.56 | <i>DRD5</i>     | NM_000798    | Missense     | p.P330L             | -0.95 | Neutral     | 0.19 | Tolerated | 0.131 | benign            |
| A57 | 7  | 142479917 | 142479917 | C | T | 30  | 0.20 | <i>PRSS2</i>    | NM_002770    | Missense     | p.P4S               | NA    | NA          | NA   | NA        | NA    | NA                |
| A57 | 5  | 156770114 | 156770114 | C | T | 87  | 0.45 | <i>FNDC9</i>    | NM_001001343 | Missense     | p.R144Q             | -0.4  | Neutral     | 0.06 | Tolerated | 0.974 | probably damaging |
| A57 | 11 | 93535032  | 93535032  | C | T | 49  | 0.37 | <i>MED17</i>    | NM_004268    | nonsense     | p.R454_             | NA    | NA          | 0.87 | Tolerated | NA    | NA                |
| A57 | 3  | 126708044 | 126708044 | G | A | 114 | 0.53 | <i>PLXNA1</i>   | NM_032242    | Missense     | p.S203N             | -2.38 | Neutral     | 0    | Damaging  | 0.542 | possibly damaging |
| A57 | 19 | 10561573  | 10561573  | A | G | 41  | 0.54 | <i>PDE4A</i>    | NM_001111307 | Missense     | p.T247A             | -4.18 | Deleterious | 0.02 | Damaging  | 0.167 | benign            |
| A57 | 15 | 75122688  | 75122688  | T | A | 23  | 0.43 | <i>CPLX3</i>    | NM_001030005 | Missense     | p.V157D             | -4.84 | Deleterious | 0    | Damaging  | 0.265 | benign            |
| A58 | 4  | 2696747   | 2696747   | C | T | 61  | 0.61 | <i>FAM193A</i>  | NM_001256666 | Missense     | p.A765V             | -0.57 | Neutral     | 0.22 | Tolerated | 0.634 | possibly damaging |
| A58 | 2  | 49210073  | 49210073  | C | T | 121 | 0.39 | <i>FSHR</i>     | NM_000145    | Missense     | p.G216R             | -6.48 | Deleterious | NA   | NA        | 1     | probably damaging |
| A58 | 1  | 196965323 | 196965323 | T | A | 51  | 0.33 | <i>CFHR5</i>    | NM_030787    | Missense     | p.M321K             | 1.46  | Neutral     | 0.98 | Tolerated | 0     | benign            |
| A58 | 4  | 94436507  | 94436507  | A | G | 29  | 0.48 | <i>GRID2</i>    | NM_001510    | Missense     | p.N713S             | -0.4  | Neutral     | 1    | Tolerated | 0.014 | benign            |
| A58 | 15 | 74365127  | 74365127  | T | G | 19  | 0.26 | <i>GOLGA6A</i>  | NM_001038640 | Missense     | p.Q486P             | -2.83 | Deleterious | 0.09 | Tolerated | 0.383 | benign            |
| A58 | 17 | 56833744  | 56833744  | G | T | 29  | 0.59 | <i>PPM1E</i>    | NM_014906    | Missense     | p.R129L             | -1.28 | Neutral     | 0.65 | Tolerated | 0.868 | possibly damaging |
| A58 | 21 | 44514780  | 44514780  | C | T | 94  | 0.28 | <i>U2AF1</i>    | NM_001025203 | Missense     | p.R156H             | -4.43 | Deleterious | 0    | Damaging  | 0.947 | possibly damaging |
| A58 | 4  | 88536868  | 88536868  | T | T | 12  | 0.50 | <i>DSPP</i>     | NM_014208    | In_Frame_Del | p.SDSSNS102<br>5del | -2.31 | Neutral     | NA   | NA        | NA    | NA                |
| A58 | 20 | 76650     | 76650     | C | A | 65  | 0.42 | <i>DEFB125</i>  | NM_153325    | Missense     | p.NSSDSS102<br>9del | -1.28 | Neutral     | 0.04 | Damaging  | 0.989 | probably damaging |
| A58 | 20 | 43561803  | 43561803  | C | T | 66  | 0.35 | <i>PABPCIL</i>  | NM_001124756 | Missense     | p.208_209AL<br>>V   | -0.49 | Neutral     | 0.18 | Tolerated | 0.688 | possibly damaging |

|     |    |           |           |            |   |     |      |                |              |                 |                     |        |             |      |           |       |                   |
|-----|----|-----------|-----------|------------|---|-----|------|----------------|--------------|-----------------|---------------------|--------|-------------|------|-----------|-------|-------------------|
| A58 | 11 | 132306061 | 132306061 | C          | T | 144 | 0.09 | <i>OPCML</i>   | NM_002545    | Missense        | p.K216del           | -0.81  | Neutral     | 0    | Damaging  | 0.997 | probably damaging |
| A59 | 10 | 115384635 | 115384635 | C          | T | 58  | 0.43 | <i>NRAP</i>    | NM_001261463 | Missense        | p.KKK73del          | -4.8   | Deleterious | 0    | Damaging  | 1     | probably damaging |
| A59 | 12 | 83526035  | 83526035  | G          | T | 77  | 0.49 | <i>TMTC2</i>   | NM_152588    | Missense        | p.I33del            | -7.56  | Deleterious | 0    | Damaging  | 1     | probably damaging |
| A59 | 12 | 351866    | 351866    | A          | G | 101 | 0.37 | <i>SLC6A13</i> | NM_016615    | Missense        | p.EPGCTKVP<br>95del | -3.42  | Deleterious | 0.09 | Tolerated | 0.85  | possibly damaging |
| A59 | 7  | 25200877  | 25200877  | T          | C | 23  | 0.52 | <i>C7orf31</i> | NM_138811    | Missense        | p.K105R             | -0.62  | Neutral     | 0.42 | Tolerated | 0.99  | probably damaging |
| A59 | 16 | 1270702   | 1270702   | G          | A | 81  | 0.49 | <i>CACNA1H</i> | NM_021098    | Missense        | p.R2257Q            | -1.23  | Neutral     | 0.09 | Tolerated | 0.997 | probably damaging |
| A59 | 2  | 128253656 | 128253656 | C          | T | 118 | 0.48 | <i>IWS1</i>    | NM_017969    | Missense        | p.R545Q             | -3.26  | Deleterious | 0.07 | Tolerated | 1     | probably damaging |
| A59 | 4  | 88536862  | 88536880  | G          | T | 14  | 0.43 | <i>DSPP</i>    | NM_014208    | In_Frame_Del    | p.NSSDSS102<br>9del | -2.31  | Neutral     | NA   | NA        | NA    | NA                |
| A59 | 2  | 241621869 | 241621869 | G          | A | 13  | 0.23 | <i>AQP12B</i>  | NM_001102467 | Missense        | p.T129M             | -1.45  | Neutral     | 0.3  | Tolerated | 0.998 | probably damaging |
| A59 | 16 | 7568374   | 7568374   | G          | A | 67  | 0.45 | <i>RBFOX1</i>  | NM_145891    | Missense        | p.V105I             | -0.16  | Neutral     | 0.86 | Tolerated | 0.998 | probably damaging |
| A59 | 3  | 13538275  | 13538275  | G          | A | 126 | 0.45 | <i>HDAC11</i>  | NM_024827    | Missense        | p.V98I              | -0.29  | Neutral     | 0    | Damaging  | 0.968 | probably damaging |
| A60 | 18 | 55024415  | 55024415  | G          | A | 193 | 0.30 | <i>ST8SLA3</i> | NM_015879    | Missense        | p.A192T             | -2.52  | Deleterious | 0.03 | Damaging  | 1     | probably damaging |
| A60 | 19 | 38229883  | 38229883  | C          | T | 53  | 0.23 | <i>ZNF573</i>  | NM_001172690 | Missense        | p.C503Y             | -10.42 | Deleterious | 0    | Damaging  | 0.961 | probably damaging |
| A60 | 1  | 235345029 | 235345029 | T          | C | 109 | 0.30 | <i>ARID4B</i>  | NM_001206794 | Missense        | p.H1069V            | 0.03   | Neutral     | 0.13 | Tolerated | 0.948 | possibly damaging |
| A60 | 11 | 17317759  | 17317759  | G          | A | 30  | 0.23 | <i>NUCB2</i>   | NM_005013    | Splice Site     | p.K82sp             | NA     | NA          | NA   | NA        | NA    | NA                |
| A60 | 21 | 36231783  | 36231783  | G          | A | 92  | 0.25 | <i>RUNX1</i>   | NM_001754    | nonsense        | p.R201_             | NA     | NA          | 1    | Tolerated | NA    | NA                |
| A60 | 4  | 186545240 | 186545240 | C          | T | 168 | 0.31 | <i>SORBS2</i>  | NM_001270771 | Missense        | p.R544H             | 2.86   | Neutral     | 1    | Tolerated | 0     | benign            |
| A60 | 10 | 82182259  | 82182259  | C          | T | 60  | 0.25 | <i>FAM213A</i> | NM_001243779 | nonsense        | p.R89_              | NA     | NA          | 1    | Tolerated | NA    | NA                |
| A60 | 15 | 56719836  | 56719836  | G          | A | 21  | 0.38 | <i>TEX9</i>    | NM_198524    | Missense        | p.V333M             | 0.02   | Neutral     | 0.1  | Tolerated | 0.493 | possibly damaging |
| A60 | 6  | 143093769 | 143093769 | C          | T | 104 | 0.25 | <i>HIVEP2</i>  | NM_006734    | Missense        | p.V703I             | -0.4   | Neutral     | 0.07 | Tolerated | 0.999 | probably damaging |
| A61 | 16 | 21049198  | 21049198  | G          | T | 69  | 0.45 | <i>DNAH3</i>   | NM_017539    | Missense        | p.A1612D            | -5.58  | Deleterious | 0    | Damaging  | 1     | probably damaging |
| A61 | 1  | 2939186   | 2939186   | T          | A | 122 | 0.41 | <i>ACTRT2</i>  | NM_080431    | Missense        | p.D312E             | 0.47   | Neutral     | 0    | Damaging  | 0.248 | benign            |
| A61 | 12 | 3702274   | 3702274   | G          | A | 94  | 0.24 | <i>PRMT8</i>   | NM_019854    | Missense        | p.D371N             | -3.88  | Deleterious | 0.04 | Damaging  | 0.901 | possibly damaging |
| A61 | 1  | 22903209  | 22903209  | G          | A | 81  | 0.26 | <i>EPHA8</i>   | NM_020526    | Missense        | p.G220E             | -4.76  | Deleterious | 0.11 | Tolerated | 1     | probably damaging |
| A62 | 3  | 195512665 | 195512665 | G          | A | 17  | 0.24 | <i>MUC4</i>    | NM_018406    | Missense        | p.A1929V            | -0.23  | Neutral     | NA   | NA        | 0.805 | possibly damaging |
| A62 | 22 | 46785332  | 46785332  | G          | A | 40  | 0.40 | <i>CELSR1</i>  | NM_014246    | Missense        | p.A2137V            | -0.33  | Neutral     | 0.32 | Tolerated | 0.206 | benign            |
| A62 | 9  | 133942559 | 133942559 | G          | A | 53  | 0.32 | <i>LAMC3</i>   | NM_006059    | Missense        | p.A854T             | -2.77  | Deleterious | 0.03 | Damaging  | 0.999 | probably damaging |
| A62 | 1  | 225239282 | 225239282 | G          | A | 45  | 0.36 | <i>DNAH14</i>  | NM_001373    | Missense        | p.E737K             | -1.97  | Neutral     | 0.41 | Tolerated | 0.222 | benign            |
| A62 | 10 | 134942011 | 134942011 | G          | A | 32  | 0.38 | <i>GPRI23</i>  | NM_001083909 | Missense        | p.G227S             | -1.27  | Neutral     | 0.08 | Tolerated | 0.933 | possibly damaging |
| A62 | 21 | 36164771  | 36164785  | CATGCCGATG | C | 58  | 0.14 | <i>RUNX1</i>   | NM_001754    | Frame_Shift_Del | p.I337fs            | NA     | NA          | NA   | NA        | NA    | NA                |

## CCGAT

|     |    |           |           |     |             |     |      |                 |              |                 |                    |       |             |      |           |       |                   |
|-----|----|-----------|-----------|-----|-------------|-----|------|-----------------|--------------|-----------------|--------------------|-------|-------------|------|-----------|-------|-------------------|
| A62 | 14 | 23313673  | 23313673  | A   | T           | 61  | 0.46 | <i>MMP14</i>    | NM_004995    | Missense        | p.N369Y            | -4.03 | Deleterious | 0    | Damaging  | 0.999 | probably damaging |
| A62 | 3  | 74313607  | 74313607  | G   | C           | 106 | 0.32 | <i>CNTN3</i>    | NM_020872    | Missense        | p.P1011R           | -2.35 | Neutral     | 0.32 | Tolerated | 0.002 | benign            |
| A63 | 11 | 101362381 | 101362381 | A   | G           | 107 | 0.52 | <i>TRPC6</i>    | NM_004621    | Missense        | p.I345T            | -3.41 | Deleterious | 0    | Damaging  | 0.982 | probably damaging |
| A63 | 6  | 76024806  | 76024806  | G   | C           | 108 | 0.52 | <i>FILIP1</i>   | NM_015687    | Missense        | p.L248V            | -1.49 | Neutral     | 0.1  | Tolerated | 1     | probably damaging |
| A63 | 3  | 132409450 | 132409450 | A   | G           | 86  | 0.40 | <i>NPHP3</i>    | NM_153240    | Missense        | p.L872P            | -1.85 | Neutral     | 0.03 | Damaging  | 0.977 | probably damaging |
| A63 | 15 | 81585205  | 81585205  | C   | CGGGT       | 29  | 0.48 | <i>IL16</i>     | NM_172217    | Frame_Shift_Ins | p.P577fs           | NA    | NA          | NA   | NA        | NA    | NA                |
| A63 | 6  | 43251728  | 43251728  | C   | T           | 40  | 0.40 | <i>TTBK1</i>    | NM_032538    | Missense        | p.R1084W           | -1.93 | Neutral     | 0.02 | Damaging  | 0.997 | probably damaging |
| A63 | 8  | 3057290   | 3057290   | G   | A           | 78  | 0.45 | <i>CSMD1</i>    | NM_033225    | nonsense        | p.R1714_           | NA    | NA          | 1    | Tolerated | NA    | NA                |
| A63 | 9  | 34976562  | 34976562  | G   | A           | 34  | 0.65 | <i>KIAA1045</i> | NM_015297    | Missense        | p.R225H            | 0.16  | Neutral     | 0.29 | Tolerated | 0.023 | benign            |
| A63 | 10 | 112572152 | 112572152 | G   | A           | 59  | 0.39 | <i>RBM20</i>    | NM_001134363 | Missense        | p.R666Q            | -1.61 | Neutral     | 0.07 | Tolerated | 1     | probably damaging |
| A63 | 3  | 152058464 | 152058464 | T   | TGGCAA<br>G | 126 | 0.34 | <i>TMEM14E</i>  | NM_001123228 | In_Frame_Ins    | p.77_77Y>SC<br>H   | -4.44 | Deleterious | NA   | NA        | NA    | NA                |
| A63 | 9  | 125797594 | 125797594 | A   | G           | 98  | 0.45 | <i>GPR21</i>    | NM_005294    | Missense        | p.Y250C            | -0.52 | Neutral     | 0.01 | Damaging  | 1     | probably damaging |
| A64 | 16 | 83813678  | 83813678  | C   | T           | 92  | 0.48 | <i>CDH13</i>    | NM_001220488 | Missense        | p.A643V            | -1.49 | Neutral     | 0.28 | Tolerated | 0.977 | probably damaging |
| A64 | 22 | 23615875  | 23615875  | G   | A           | 71  | 0.46 | <i>BCR</i>      | NM_004327    | Missense        | p.A677T            | -2.74 | Deleterious | 0    | Damaging  | 1     | probably damaging |
| A64 | 11 | 60776033  | 60776033  | G   | A           | 66  | 0.50 | <i>CD6</i>      | NM_006725    | Missense        | p.G166D            | -5.88 | Deleterious | 0    | Damaging  | 1     | probably damaging |
| A64 | 13 | 114538522 | 114538522 | C   | A           | 67  | 0.40 | <i>GAS6</i>     | NM_000820    | Missense        | p.G226C            | -7.2  | Deleterious | 0    | Damaging  | 1     | probably damaging |
| A64 | 9  | 35106609  | 35106609  | C   | T           | 77  | 0.45 | <i>FAM214B</i>  | NM_025182    | Missense        | p.G329S            | 0.31  | Neutral     | 0.64 | Tolerated | 0.002 | benign            |
| A64 | 20 | 44691204  | 44691204  | C   | A           | 125 | 0.43 | <i>NCOA5</i>    | NM_020967    | Missense        | p.G492V            | -0.76 | Neutral     | 0.23 | Tolerated | 1     | probably damaging |
| A64 | 3  | 47059126  | 47059126  | A   | AC          | 64  | 0.41 | <i>SETD2</i>    | NM_014159    | Splice Site     | p.K2511sp          | NA    | NA          | NA   | NA        | NA    | NA                |
| A64 | 6  | 50696956  | 50696956  | C   | T           | 129 | 0.51 | <i>TFAP2D</i>   | NM_172238    | Missense        | p.L272F            | -2.04 | Neutral     | 0    | Damaging  | 0.905 | possibly damaging |
| A64 | 9  | 23705006  | 23705006  | G   | A           | 133 | 0.44 | <i>ELAVL2</i>   | NM_004432    | Missense        | p.P133S            | -7.46 | Deleterious | 0.03 | Damaging  | 1     | probably damaging |
| A64 | 14 | 39784004  | 39784006  | GTA | G           | 21  | 0.29 | <i>CTAGE5</i>   | NM_001247989 | Splice Site     | p.Q452sp           | NA    | NA          | NA   | NA        | NA    | NA                |
| A64 | 16 | 57180165  | 57180165  | C   | G           | 138 | 0.46 | <i>CPNE2</i>    | NM_152727    | Missense        | p.R491G            | -4.96 | Deleterious | 0.03 | Damaging  | 0.719 | possibly damaging |
| A64 | 3  | 47098971  | 47098971  | T   | TC          | 51  | 0.27 | <i>SETD2</i>    | NM_014159    | Frame_Shift_Ins | p.T2101fs          | NA    | NA          | NA   | NA        | NA    | NA                |
| A65 | 16 | 66621862  | 66621862  | T   | TGCGAA<br>A | 21  | 0.29 | <i>CMTM2</i>    | NM_144673    | In_Frame_Ins    | p.196_197insR<br>K | -6.72 | Deleterious | NA   | NA        | NA    | NA                |
| A65 | 1  | 98293728  | 98293728  | A   | AGATTCC     | 94  | 0.19 | <i>DPYD</i>     | NM_000110    | In_Frame_Ins    | p.58_59insGI       | -9.11 | Deleterious | NA   | NA        | NA    | NA                |
| A65 | 3  | 38950583  | 38950583  | C   | T           | 46  | 0.33 | <i>SCN11A</i>   | NM_014139    | Missense        | p.A402T            | -3.17 | Deleterious | 0.1  | Tolerated | 0.246 | benign            |
| A65 | 17 | 37566912  | 37566912  | T   | C           | 41  | 0.34 | <i>MED1</i>     | NM_004774    | Missense        | p.D521G            | -1.39 | Neutral     | 0.12 | Tolerated | 1     | probably damaging |
| A65 | 19 | 54135374  | 54135374  | A   | T           | 31  | 0.32 | <i>DPRX</i>     | NM_001012728 | Missense        | p.E5V              | -1.68 | Neutral     | 0.04 | Damaging  | 0.789 | possibly damaging |
| A65 | 3  | 47161764  | 47161764  | G   | GGCTTT      | 69  | 0.32 | <i>SETD2</i>    | NM_014159    | Frame_Shift_Ins | p.F1454fs          | NA    | NA          | NA   | NA        | NA    | NA                |

|     |    |           |           |      |    |     |      |                  |              |                 |             |        |             |      |           |       |                   |
|-----|----|-----------|-----------|------|----|-----|------|------------------|--------------|-----------------|-------------|--------|-------------|------|-----------|-------|-------------------|
| A65 | 6  | 69646509  | 69646509  | G    | A  | 40  | 0.45 | <i>BAI3</i>      | NM_001704    | Missense        | p.G323R     | -2.92  | Deleterious | 0    | Damaging  | 1     | probably damaging |
| A65 | 19 | 35622927  | 35622927  | T    | C  | 82  | 0.38 | <i>LGI4</i>      | NM_139284    | Missense        | p.I112V     | -0.75  | Neutral     | 0.04 | Damaging  | 0.914 | possibly damaging |
| A65 | 19 | 38376118  | 38376118  | C    | G  | 200 | 0.46 | <i>WDR87</i>     | NM_031951    | Missense        | p.K2692N    | -2.63  | Deleterious | 0    | Damaging  | 1     | probably damaging |
| A65 | 6  | 33146696  | 33146696  | C    | A  | 45  | 0.51 | <i>COL11A2</i>   | NM_080680    | Splice Site     | p.K448sp    | NA     | NA          | NA   | NA        | NA    | NA                |
| A65 | 1  | 151509267 | 151509267 | G    | T  | 57  | 0.33 | <i>CGN</i>       | NM_020770    | Missense        | p.R1123L    | -6.33  | Deleterious | 0.02 | Damaging  | 1     | probably damaging |
| A65 | 9  | 33246723  | 33246723  | G    | A  | 34  | 0.26 | <i>SPINK4</i>    | NM_014471    | Missense        | p.R71Q      | -1.91  | Neutral     | 0.28 | Tolerated | 0.999 | probably damaging |
| A65 | 3  | 195513493 | 195513493 | C    | A  | 25  | 0.20 | <i>MUC4</i>      | NM_018406    | Missense        | p.S1653I    | -0.13  | Neutral     | NA   | NA        | 0.797 | possibly damaging |
| A65 | 17 | 7350889   | 7350889   | C    | G  | 106 | 0.36 | <i>CHRNB1</i>    | NM_000747    | Missense        | p.S177W     | -4.25  | Deleterious | 0.04 | Damaging  | 1     | probably damaging |
| A65 | 11 | 124294029 | 124294029 | C    | G  | 105 | 0.33 | <i>OR8B4</i>     | NM_001005196 | Missense        | p.V247L     | -2.52  | Deleterious | 0.05 | Damaging  | 0.971 | probably damaging |
| A65 | 16 | 75269677  | 75269677  | C    | T  | 68  | 0.49 | <i>BCAR1</i>     | NM_001170714 | Missense        | p.V420M     | -1.54  | Neutral     | 0.13 | Tolerated | 1     | probably damaging |
| A65 | 17 | 42168683  | 42168683  | C    | T  | 42  | 0.38 | <i>HDAC5</i>     | NM_001015053 | Missense        | p.V449M     | 0.13   | Neutral     | 0.62 | Tolerated | 0.999 | probably damaging |
| A65 | 3  | 47058711  | 47058711  | A    | AG | 74  | 0.34 | <i>SETD2</i>     | NM_014159    | Frame_Shift_Ins | p.Y2523fs   | NA     | NA          | NA   | NA        | NA    | NA                |
| A65 | 21 | 31933589  | 31933589  | T    | C  | 105 | 0.36 | <i>KRTAP19-7</i> | NM_181614    | Missense        | p.Y7C       | -5.06  | Deleterious | 0    | Damaging  | 0.011 | benign            |
| A66 | 3  | 190573431 | 190573431 | C    | T  | 60  | 0.42 | <i>GMNC</i>      | NM_001146686 | Missense        | p.A220T     | -0.03  | Neutral     | 0.72 | Tolerated | 0     | benign            |
| A66 | 6  | 84895045  | 84895045  | G    | A  | 51  | 0.51 | <i>KLAA1009</i>  | NM_014895    | Missense        | p.A508V     | -1.09  | Neutral     | 0.24 | Tolerated | 0.99  | probably damaging |
| A66 | 19 | 9088055   | 9088055   | C    | T  | 126 | 0.52 | <i>MUC16</i>     | NM_024690    | Missense        | p.G1254R    | -1.93  | Neutral     | 0    | Damaging  | 0.519 | possibly damaging |
| A66 | 14 | 64892742  | 64892742  | T    | C  | 11  | 0.36 | <i>MTHFD1</i>    | NM_005956    | Missense        | p.I320T     | -4.54  | Deleterious | 0    | Damaging  | 0.995 | probably damaging |
| A66 | 2  | 133541770 | 133541770 | G    | T  | 74  | 0.41 | <i>NCKAP5</i>    | NM_207363    | Missense        | p.L872I     | -1.12  | Neutral     | 0.18 | Tolerated | 0.822 | possibly damaging |
| A66 | 3  | 47371553  | 47371553  | A    | G  | 42  | 0.17 | <i>KLHL18</i>    | NM_025010    | Missense        | p.M172V     | -0.99  | Neutral     | 0.18 | Tolerated | 0     | benign            |
| A66 | 19 | 56041480  | 56041481  | AG   | A  | 23  | 0.52 | <i>SBK2</i>      | NM_001101401 | Frame_Shift_Del | p.P222fs    | NA     | NA          | NA   | NA        | NA    | NA                |
| A66 | 11 | 28112994  | 28112994  | G    | C  | 83  | 0.45 | <i>KIF18A</i>    | NM_031217    | Missense        | p.Q184E     | -0.7   | Neutral     | 0.15 | Tolerated | 0.013 | benign            |
| A66 | 12 | 6697096   | 6697096   | C    | G  | 84  | 0.40 | <i>CHD4</i>      | NM_001273    | Missense        | p.R1162P    | -6.29  | Deleterious | 0    | Damaging  | 0.999 | probably damaging |
| A66 | 4  | 42895323  | 42895323  | C    | T  | 34  | 0.38 | <i>GRXCR1</i>    | NM_001080476 | Missense        | p.R14W      | -2.27  | Neutral     | 0    | Damaging  | 0.998 | probably damaging |
| A66 | 9  | 84228342  | 84228342  | C    | T  | 42  | 0.38 | <i>TLE1</i>      | NM_005077    | Missense        | p.R338H     | -2.64  | Deleterious | 0.01 | Damaging  | 1     | probably damaging |
| A66 | 10 | 101567839 | 101567839 | G    | A  | 152 | 0.45 | <i>ABCC2</i>     | NM_000392    | Splice Site     | p.R631sp    | NA     | NA          | NA   | NA        | NA    | NA                |
| A66 | 9  | 5078360   | 5078360   | A    | G  | 26  | 0.46 | <i>JAK2</i>      | NM_004972    | Missense        | p.R683G     | -5.88  | Deleterious | 0    | Damaging  | 1     | probably damaging |
| A66 | 10 | 115804724 | 115804724 | C    | T  | 14  | 0.36 | <i>ADRB1</i>     | NM_000684    | Missense        | p.S278L     | -1.15  | Neutral     | 0.28 | Tolerated | 0.11  | benign            |
| A66 | 3  | 185252860 | 185252860 | G    | A  | 104 | 0.45 | <i>LIPH</i>      | NM_139248    | Missense        | p.T37M      | -3.47  | Deleterious | 0.01 | Damaging  | 1     | probably damaging |
| A66 | 1  | 152192219 | 152192219 | G    | C  | 27  | 0.11 | <i>HRNR</i>      | NM_001009931 | Missense        | p.T629S     | 1.5    | Neutral     | 0.78 | Tolerated | 0     | benign            |
| A66 | 19 | 36322580  | 36322581  | AC   | A  | 15  | 0.47 | <i>NPHS1</i>     | NM_004646    | Frame_Shift_Del | p.V1084fs   | NA     | NA          | NA   | NA        | NA    | NA                |
| A67 | 21 | 26969689  | 26969692  | AAAG | A  | 20  | 0.30 | <i>MRPL39</i>    | NM_080794    |                 | p.208_209AL | -10.49 | Deleterious | NA   | NA        | NA    | NA                |
| A67 | X  | 101159223 | 101159223 | C    | A  | 55  | 0.95 | <i>ZMAT1</i>     | NM_001011657 | nonsense        | p.E68_>V    | NA     | NA          | 0.05 | Damaging  | NA    | NA                |

|     |    |           |           |       |      |     |      |                 |              |                 |                   |       |             |      |           |       |                   |
|-----|----|-----------|-----------|-------|------|-----|------|-----------------|--------------|-----------------|-------------------|-------|-------------|------|-----------|-------|-------------------|
| A67 | 17 | 43005428  | 43005428  | C     | T    | 96  | 0.45 | <i>KIF18B</i>   | NM_001265577 | Missense        | p.E748K           | -0.71 | Neutral     | 0.63 | Tolerated | 0.873 | possibly damaging |
| A67 | 2  | 27324371  | 27324371  | C     | T    | 24  | 0.21 | <i>CGREF1</i>   | NM_001166239 | Missense        | p.G243E           | -0.08 | Neutral     | 0.34 | Tolerated | 0.36  | benign            |
| A67 | 1  | 248524992 | 248524992 | A     | G    | 79  | 0.13 | <i>OR2T4</i>    | NM_001004696 | Missense        | p.N37S            | -3.3  | Deleterious | 0.01 | Damaging  | 0.028 | benign            |
| A67 | 6  | 71562360  | 71562361  | CA    | C    | 73  | 0.36 | <i>SMAP1</i>    | NM_001044305 | Frame_Shift_Del | p.P261fs          | NA    | NA          | NA   | NA        | NA    | NA                |
| A67 | 11 | 1093631   | 1093631   | G     | C    | 70  | 0.09 | <i>MUC2</i>     | NM_002457    | Missense        | p.S1817T          | 0.48  | Neutral     | 0.5  | Tolerated | 0     | benign            |
| A68 | 19 | 12858277  | 12858277  | C     | CGGG | 49  | 0.22 | <i>ASNA1</i>    | NM_004317    | In_Frame_Ins    | p.262_263ins<br>G | -9.71 | Deleterious | NA   | NA        | NA    | NA                |
| A68 | X  | 54949351  | 54949351  | C     | A    | 47  | 0.11 | <i>TRO</i>      | NM_001039705 | Missense        | p.A129D           | -2    | Neutral     | 0.04 | Damaging  | 0.745 | possibly damaging |
| A68 | 3  | 195508009 | 195508009 | G     | A    | 12  | 0.25 | <i>MUC4</i>     | NM_018406    | Missense        | p.A3481V          | -0.48 | Neutral     | NA   | NA        | 0.735 | possibly damaging |
| A68 | 1  | 115258747 | 115258747 | C     | T    | 43  | 0.23 | <i>NRAS</i>     | NM_002524    | Missense        | p.G12D            | -5.35 | Deleterious | 0    | Damaging  | 0.372 | benign            |
| A68 | 1  | 160340606 | 160340606 | G     | A    | 28  | 0.68 | <i>NHLH1</i>    | NM_005598    | Missense        | p.G29R            | -0.44 | Neutral     | 0.26 | Tolerated | 0.01  | benign            |
| A68 | 1  | 228557668 | 228557668 | G     | A    | 73  | 0.19 | <i>OBSCN</i>    | NM_001271223 | Missense        | p.G7622S          | -3.41 | Deleterious | 0.45 | Tolerated | 1     | probably damaging |
| A68 | 19 | 12858275  | 12858275  | A     | G    | 53  | 0.23 | <i>ASNA1</i>    | NM_004317    | Missense        | p.I262V           | 0.06  | Neutral     | 0.77 | Tolerated | 0.278 | benign            |
| A68 | 11 | 71724224  | 71724224  | T     | G    | 44  | 0.50 | <i>NUMA1</i>    | NM_006185    | Missense        | p.K1442T          | -0.97 | Neutral     | 0.08 | Tolerated | 0.493 | possibly damaging |
| A68 | 1  | 7890026   | 7890026   | A     | G    | 83  | 0.20 | <i>PER3</i>     | NM_016831    | Missense        | p.K998E           | 0.66  | Neutral     | 1    | Tolerated | 0     | benign            |
| A68 | 3  | 187086326 | 187086326 | C     | G    | 61  | 0.51 | <i>RTP4</i>     | NM_022147    | Missense        | p.L33V            | -2.03 | Neutral     | 0.07 | Tolerated | 0.995 | probably damaging |
| A68 | 16 | 28914643  | 28914643  | G     | A    | 83  | 0.12 | <i>ATP2A1</i>   | NM_173201    | Splice Site     | p.M830sp          | NA    | NA          | NA   | NA        | NA    | NA                |
| A68 | 1  | 7890024   | 7890024   | T     | G    | 85  | 0.18 | <i>PER3</i>     | NM_016831    | Missense        | p.M997R           | -0.32 | Neutral     | 0.65 | Tolerated | 0     | benign            |
| A68 | 19 | 14717804  | 14717804  | G     | T    | 38  | 0.11 | <i>CLEC17A</i>  | NM_001204118 | Splice Site     | p.N299sp          | NA    | NA          | NA   | NA        | NA    | NA                |
| A68 | 17 | 79410417  | 79410417  | C     | T    | 43  | 0.37 | <i>BAHCC1</i>   | NM_001080519 | Missense        | p.P626L           | -6.91 | Deleterious | 0.02 | Damaging  | 0.991 | probably damaging |
| A68 | 2  | 88409913  | 88409913  | G     | A    | 45  | 0.56 | <i>SMYD1</i>    | NM_198274    | Missense        | p.R452H           | -0.86 | Neutral     | 0.01 | Damaging  | 0.001 | benign            |
| A68 | 15 | 74179971  | 74179971  | C     | T    | 43  | 0.44 | <i>TBC1D21</i>  | NM_153356    | Missense        | p.T263M           | -5.49 | Deleterious | 0    | Damaging  | 0.996 | probably damaging |
| A68 | 11 | 119185731 | 119185731 | G     | A    | 53  | 0.47 | <i>MCAM</i>     | NM_006500    | Missense        | p.T71M            | -0.13 | Neutral     | 0.12 | Tolerated | 0.084 | benign            |
| A68 | 12 | 21422655  | 21422655  | C     | A    | 49  | 0.49 | <i>SLCO1A2</i>  | NM_021094    | Missense        | p.V614F           | -0.68 | Neutral     | 0.55 | Tolerated | 0     | benign            |
| A70 | 1  | 78958472  | 78958472  | C     | T    | 88  | 0.49 | <i>PTGFR</i>    | NM_000959    | Missense        | p.A15V            | -0.4  | Neutral     | 0.3  | Tolerated | 0.001 | benign            |
| A70 | 7  | 56045958  | 56045962  | TGTGA | T    | 101 | 0.24 | <i>GBAS</i>     | NM_001483    | Splice Site     | p.F78sp           | NA    | NA          | NA   | NA        | NA    | NA                |
| A70 | X  | 47083137  | 47083137  | G     | T    | 43  | 0.44 | <i>CDK16</i>    | NM_001170460 | Missense        | p.G135C           | -1    | Neutral     | 0.01 | Damaging  | 0.983 | probably damaging |
| A70 | 1  | 51829571  | 51829571  | C     | T    | 150 | 0.47 | <i>EPS15</i>    | NM_001981    | Missense        | p.G776R           | -3.49 | Deleterious | 0.31 | Tolerated | 1     | probably damaging |
| A70 | 15 | 34648797  | 34648797  | T     | C    | 73  | 0.47 | <i>NUTMI</i>    | NM_175741    | Missense        | p.L835P           | -2.24 | Neutral     | 0    | Damaging  | 0.385 | benign            |
| A70 | 10 | 106166477 | 106166477 | C     | T    | 112 | 0.49 | <i>CCDC147</i>  | NM_001008723 | nonsense        | p.Q728_           | NA    | NA          | 0.75 | Tolerated | NA    | NA                |
| A70 | 12 | 129028546 | 129028546 | G     | A    | 50  | 0.34 | <i>TMEM132C</i> | NM_001136103 | Missense        | p.R340H           | -0.82 | Neutral     | 0.05 | Damaging  | 0.994 | probably damaging |
| A70 | 7  | 50367243  | 50367243  | G     | GC   | 68  | 0.34 | <i>IKZF1</i>    | NM_006060    | Frame_Shift_Ins | p.S17fs           | NA    | NA          | NA   | NA        | NA    | NA                |
| A70 | 12 | 49920033  | 49920033  | T     | A    | 98  | 0.45 | <i>SPATS2</i>   | NM_023071    | Missense        | p.S545T           | -0.53 | Neutral     | 0.06 | Tolerated | 0.596 | possibly damaging |

|     |    |           |           |      |   |     |      |                 |              |              |           |       |             |      |           |       |                   |
|-----|----|-----------|-----------|------|---|-----|------|-----------------|--------------|--------------|-----------|-------|-------------|------|-----------|-------|-------------------|
| A70 | 19 | 38948930  | 38948930  | C    | T | 245 | 0.42 | <i>RYR1</i>     | NM_000540    | Missense     | p.T722I   | -3.74 | Deleterious | 0.01 | Damaging  | 0.944 | possibly damaging |
| A70 | 16 | 71668362  | 71668362  | G    | A | 104 | 0.47 | <i>MARVELD3</i> | NM_052858    | Missense     | p.V288I   | 0.26  | Neutral     | 0.29 | Tolerated | 0.002 | benign            |
| A71 | 5  | 114879163 | 114879163 | C    | T | 47  | 0.21 | <i>FEM1C</i>    | NM_020177    | Missense     | p.A10T    | -2.27 | Neutral     | 0.01 | Damaging  | 1     | probably damaging |
| A71 | 10 | 105963507 | 105963507 | A    | T | 54  | 0.17 | <i>WDR96</i>    | NM_025145    | Missense     | p.F340I   | -0.53 | Neutral     | 0.5  | Tolerated | 0.944 | possibly damaging |
| A71 | 1  | 115258747 | 115258747 | C    | G | 57  | 0.35 | <i>NRAS</i>     | NM_002524    | Missense     | p.G12A    | -4.62 | Deleterious | 0    | Damaging  | 0.775 | possibly damaging |
| A71 | 11 | 74873698  | 74873698  | A    | G | 54  | 0.13 | <i>SLCO2B1</i>  | NM_007256    | Splice Site  | p.G6sp    | NA    | NA          | NA   | NA        | NA    | NA                |
| A71 | 17 | 691247    | 691247    | A    | G | 23  | 0.30 | <i>RNMTL1</i>   | NM_018146    | Missense     | p.K201R   | -0.5  | Neutral     | 0.26 | Tolerated | 0.001 | benign            |
| A71 | 9  | 21994329  | 21994329  | A    | T | 65  | 0.29 | <i>CDKN2A</i>   | NM_058195    | Missense     | p.M1K     | -5.18 | Deleterious | 0    | Damaging  | 0.51  | possibly damaging |
| A71 | 6  | 31540617  | 31540617  | A    | G | 62  | 0.39 | <i>LTA</i>      | NM_001159740 | Missense     | p.Q33R    | -1.15 | Neutral     | 0.01 | Damaging  | 0.58  | possibly damaging |
| A71 | 2  | 189859787 | 189859787 | C    | T | 65  | 0.28 | <i>COL3A1</i>   | NM_000090    | nonsense     | p.R491_   | NA    | NA          | 1    | Tolerated | NA    | NA                |
| A71 | 1  | 145293566 | 145293566 | G    | A | 22  | 0.32 | <i>NBPF10</i>   | NM_001039703 | Missense     | p.R54Q    | 0.82  | Neutral     | 1    | Tolerated | NA    | NA                |
| A71 | 4  | 9892247   | 9892247   | G    | A | 39  | 0.46 | <i>SLC2A9</i>   | NM_020041    | Missense     | p.T401M   | -2.37 | Neutral     | 0    | Damaging  | 0.257 | benign            |
| A71 | 12 | 121682942 | 121682942 | C    | T | 25  | 0.24 | <i>CAMKK2</i>   | NM_001270485 | Splice Site  | p.T516sp  | NA    | NA          | NA   | NA        | NA    | NA                |
| A71 | 5  | 38407063  | 38407063  | T    | C | 67  | 0.31 | <i>EGFLAM</i>   | NM_001205301 | Missense     | p.V321A   | -0.07 | Neutral     | 0.84 | Tolerated | 0.001 | benign            |
| A71 | 10 | 126691583 | 126691583 | C    | T | 22  | 0.27 | <i>CTBP2</i>    | NM_022802    | Missense     | p.V642M   | -2.45 | Neutral     | 0.04 | Damaging  | 0.97  | probably damaging |
| A72 | 7  | 50605676  | 50605676  | G    | A | 54  | 0.22 | <i>DDC</i>      | NM_000790    | Missense     | p.A106V   | -0.85 | Neutral     | 0.1  | Tolerated | 0.048 | benign            |
| A72 | 2  | 31600051  | 31600051  | G    | A | 48  | 0.31 | <i>XDH</i>      | NM_000379    | Missense     | p.A432V   | -3.5  | Deleterious | 0    | Damaging  | 0.996 | probably damaging |
| A72 | 1  | 115258747 | 115258747 | C    | T | 33  | 0.21 | <i>NRAS</i>     | NM_002524    | Missense     | p.G12D    | -5.35 | Deleterious | 0    | Damaging  | 0.372 | benign            |
| A72 | 15 | 55652331  | 55652331  | T    | C | 83  | 0.16 | <i>CCPG1</i>    | NM_001204450 | Missense     | p.K547R   | -1.17 | Neutral     | 0.37 | Tolerated | 0.993 | probably damaging |
| A72 | 19 | 18705208  | 18705208  | C    | A | 50  | 0.22 | <i>CRLF1</i>    | NM_004750    | Missense     | p.R354L   | -0.33 | Neutral     | 0.66 | Tolerated | 0.649 | possibly damaging |
| A72 | 2  | 153512896 | 153512896 | G    | C | 137 | 0.26 | <i>PRPF40A</i>  | NM_017892    | Missense     | p.S906C   | -2.46 | Neutral     | 0.01 | Damaging  | 0.997 | probably damaging |
| A72 | 3  | 130744066 | 130744066 | C    | A | 166 | 0.23 | <i>ASTE1</i>    | NM_014065    | Missense     | p.V29F    | -3.66 | Deleterious | 0.03 | Damaging  | 0.988 | probably damaging |
| A73 | 7  | 20784913  | 20784913  | C    | A | 69  | 0.39 | <i>ABCB5</i>    | NM_001163941 | Missense     | p.A1094E  | -2.18 | Neutral     | 0    | Damaging  | 0.602 | possibly damaging |
| A73 | 1  | 19062154  | 19062154  | C    | T | 37  | 0.24 | <i>PAX7</i>     | NM_002584    | Missense     | p.A395V   | -1.77 | Neutral     | 0.14 | Tolerated | 0.926 | possibly damaging |
| A73 | 16 | 57197939  | 57197939  | T    | G | 94  | 0.40 | <i>FAM192A</i>  | NM_024946    | Missense     | p.D174A   | 0.03  | Neutral     | 0.75 | Tolerated | 0     | benign            |
| A73 | 5  | 78340206  | 78340206  | A    | T | 229 | 0.38 | <i>DMGDH</i>    | NM_013391    | Missense     | p.D305E   | -1.36 | Neutral     | 0.16 | Tolerated | 0.929 | possibly damaging |
| A73 | 14 | 75266060  | 75266060  | G    | C | 115 | 0.36 | <i>YLPM1</i>    | NM_019589    | Missense     | p.E1354Q  | -1.16 | Neutral     | 0.07 | Tolerated | 0.986 | probably damaging |
| A73 | 17 | 39768802  | 39768802  | C    | T | 19  | 0.32 | <i>KRT16</i>    | NM_005557    | Missense     | p.G47R    | -3.57 | Deleterious | 0.24 | Tolerated | 0.671 | possibly damaging |
| A73 | 7  | 100645834 | 100645834 | A    | G | 28  | 0.11 | <i>MUC12</i>    | NM_001164462 | Missense     | p.H3997R  | -1.86 | Neutral     | 0.54 | Tolerated | NA    | NA                |
| A73 | 1  | 1737942   | 1737942   | A    | C | 71  | 0.37 | <i>GNB1</i>     | NM_002074    | Missense     | p.I80S    | -4.95 | Deleterious | 0.03 | Damaging  | 0.997 | probably damaging |
| A73 | 7  | 140453134 | 140453134 | T    | C | 45  | 0.29 | <i>BRAF</i>     | NM_004333    | Missense     | p.K601E   | -3.71 | Deleterious | 0    | Damaging  | 0.784 | possibly damaging |
| A73 | 9  | 139569199 | 139569202 | ACTT | A | 103 | 0.36 | <i>AGPAT2</i>   | NM_006412    | In_Frame_Del | p.K216del | -9.84 | Deleterious | NA   | NA        | NA    | NA                |
| A73 | 6  | 55147095  | 55147095  | G    | A | 125 | 0.42 | <i>HCRTR2</i>   | NM_001526    | Missense     | p.R393Q   | -1.14 | Neutral     | 0.57 | Tolerated | 0.027 | benign            |

|     |    |           |           |   |   |     |      |                       |              |          |          |       |             |      |           |       |                   |
|-----|----|-----------|-----------|---|---|-----|------|-----------------------|--------------|----------|----------|-------|-------------|------|-----------|-------|-------------------|
| A73 | 1  | 47284367  | 47284367  | C | T | 57  | 0.39 | <i>CYP4B1</i>         | NM_001099772 | Missense | p.R474C  | -6.2  | Deleterious | NA   | NA        | 0.999 | probably damaging |
| A73 | 17 | 32961826  | 32961826  | G | A | 43  | 0.40 | <i>TMEM132E</i>       | NM_207313    | Missense | p.R476Q  | -3.46 | Deleterious | 0.05 | Damaging  | 1     | probably damaging |
| A73 | 4  | 23815345  | 23815345  | T | A | 104 | 0.37 | <i>PPARGC1A</i>       | NM_013261    | Missense | p.R587S  | -0.9  | Neutral     | 0.34 | Tolerated | 0.982 | probably damaging |
| A73 | 12 | 52845435  | 52845435  | C | T | 45  | 0.15 | <i>KRT6B</i>          | NM_005555    | Missense | p.S143N  | -1.42 | Neutral     | 0.05 | Damaging  | 0.053 | benign            |
| A73 | 12 | 100496586 | 100496586 | C | T | 72  | 0.29 | <i>UHRF1BP1<br/>L</i> | NM_015054    | Missense | p.S99N   | -1.4  | Neutral     | 0.21 | Tolerated | 0.073 | benign            |
| A73 | 1  | 236645825 | 236645825 | C | T | 57  | 0.35 | <i>EDARADD</i>        | NM_145861    | Missense | p.T175M  | -4.54 | Deleterious | NA   | NA        | 0.999 | probably damaging |
| A74 | 16 | 1706649   | 1706649   | G | A | 128 | 0.52 | <i>CRAMP1L</i>        | NM_020825    | Missense | p.D631N  | -1.02 | Neutral     | 0.1  | Tolerated | 0.675 | possibly damaging |
| A74 | 12 | 16043552  | 16043552  | G | A | 29  | 0.28 | <i>STRAP</i>          | NM_007178    | Missense | p.G118R  | -7    | Deleterious | 0    | Damaging  | 1     | probably damaging |
| A74 | 3  | 52402764  | 52402764  | G | A | 26  | 0.46 | <i>DNAH1</i>          | NM_015512    | Missense | p.G1925R | -7.7  | Deleterious | 0    | Damaging  | 1     | probably damaging |
| A74 | 1  | 240371913 | 240371913 | G | T | 91  | 0.46 | <i>FMN2</i>           | NM_020066    | Missense | p.L1267F | -2.6  | Deleterious | NA   | NA        | 1     | probably damaging |
| A74 | 4  | 148406949 | 148406949 | C | T | 172 | 0.48 | <i>EDNRA</i>          | NM_001957    | Missense | p.T39I   | -0.36 | Neutral     | 0.14 | Tolerated | 0.589 | possibly damaging |
| A74 | 7  | 57187764  | 57187764  | G | A | 63  | 0.41 | <i>ZNF479</i>         | NM_033273    | Missense | p.T453I  | -5.11 | Deleterious | 0.27 | Tolerated | 0.116 | benign            |
| A74 | 2  | 201469525 | 201469525 | A | G | 114 | 0.41 | <i>AOX1</i>           | NM_001159    | Missense | p.Y259C  | -6.79 | Deleterious | 0.01 | Damaging  | 0.997 | probably damaging |
| A75 | 5  | 137347496 | 137347496 | G | T | 54  | 0.28 | <i>FAM13B</i>         | NM_016603    | Missense | p.A170E  | -1.9  | Neutral     | 0.05 | Damaging  | 0.998 | probably damaging |
| A75 | 5  | 140724975 | 140724975 | G | A | 155 | 0.32 | <i>PCDHGA3</i>        | NM_018916    | Missense | p.A459T  | -1.35 | Neutral     | 0.19 | Tolerated | 0.504 | possibly damaging |
| A75 | X  | 41495908  | 41495908  | C | G | 47  | 0.60 | <i>CASK</i>           | NM_003688    | Missense | p.D280H  | -2.97 | Deleterious | 0    | Damaging  | 1     | probably damaging |
| A75 | 19 | 41944181  | 41944181  | C | A | 108 | 0.24 | <i>ATP5SL</i>         | NM_001167867 | nonsense | p.E59_   | NA    | NA          | 0.1  | Tolerated | NA    | NA                |
| A75 | 11 | 66392254  | 66392254  | G | A | 66  | 0.21 | <i>RBM14</i>          | NM_006328    | Missense | p.G303S  | 0.54  | Neutral     | 0.29 | Tolerated | 1     | probably damaging |
| A75 | 7  | 48285506  | 48285506  | A | C | 93  | 0.30 | <i>ABCA13</i>         | NM_152701    | Missense | p.K513T  | -0.59 | Neutral     | 0.02 | Damaging  | 0.213 | benign            |
| A75 | 6  | 35945010  | 35945010  | G | T | 76  | 0.30 | <i>SLC26A8</i>        | NM_001193476 | Missense | p.L382I  | -0.68 | Neutral     | 0.15 | Tolerated | 0.473 | possibly damaging |
| A75 | 11 | 55406609  | 55406609  | C | T | 98  | 0.55 | <i>OR4P4</i>          | NM_001004124 | Missense | p.P259L  | -8.58 | Deleterious | 0    | Damaging  | 0.772 | possibly damaging |
| A75 | 17 | 77757645  | 77757645  | C | T | 81  | 0.31 | <i>CBX2</i>           | NM_005189    | Missense | p.R135W  | -3.89 | Deleterious | 0.01 | Damaging  | 1     | probably damaging |
| A75 | X  | 41495910  | 41495910  | C | T | 48  | 0.58 | <i>CASK</i>           | NM_003688    | Missense | p.R279Q  | -2.38 | Neutral     | 0.01 | Damaging  | 0.998 | probably damaging |
| A75 | 12 | 52884454  | 52884454  | G | A | 140 | 0.23 | <i>KRT6A</i>          | NM_005554    | Missense | p.R326C  | -7.15 | Deleterious | 0.01 | Damaging  | 0.989 | probably damaging |
| A75 | 10 | 99517399  | 99517399  | C | T | 68  | 0.18 | <i>ZFYVE27</i>        | NM_001002261 | Missense | p.R369W  | -4.06 | Deleterious | NA   | NA        | 1     | probably damaging |
| A75 | 5  | 73153591  | 73153591  | G | A | 30  | 0.27 | <i>ARHGEF28</i>       | NM_001080479 | Missense | p.R634Q  | -1.88 | Neutral     | 0.05 | Damaging  | 1     | probably damaging |
| A75 | X  | 104464853 | 104464853 | G | A | 20  | 0.75 | <i>TEX13A</i>         | NM_031274    | Missense | p.R77C   | -7.48 | Deleterious | 0    | Damaging  | 1     | probably damaging |
| A75 | 7  | 130021607 | 130021607 | C | T | 145 | 0.26 | <i>CPA1</i>           | NM_001868    | Missense | p.S95L   | -0.65 | Neutral     | 0.29 | Tolerated | 0.004 | benign            |
| A75 | 2  | 203420606 | 203420606 | A | G | 118 | 0.21 | <i>BMPR2</i>          | NM_001204    | Missense | p.T740A  | -0.16 | Neutral     | 0.84 | Tolerated | 0     | benign            |
| A76 | 11 | 92599980  | 92599980  | C | T | 101 | 0.33 | <i>FAT3</i>           | NM_001008781 | Missense | p.A3911V | -0.01 | Neutral     | 0.5  | Tolerated | 0.199 | benign            |
| A76 | 1  | 148011037 | 148011037 | C | G | 48  | 0.13 | <i>NBPF8</i>          | NM_001037501 | Missense | p.D625H  | -0.43 | Neutral     | 0.01 | Damaging  | 0.918 | possibly damaging |



|     |    |           |           |   | GGCTGCT |     |      |                 |              |                 |              |       |             |      |           |       |                   |
|-----|----|-----------|-----------|---|---------|-----|------|-----------------|--------------|-----------------|--------------|-------|-------------|------|-----------|-------|-------------------|
|     |    |           |           |   | GCTGCTG |     |      |                 |              |                 |              |       |             |      |           |       |                   |
| A76 | 1  | 154842199 | 154842199 | G | CTGCTGC | 14  | 0.14 | <i>KCNN3</i>    | NM_001204087 | In_Frame_Ins    | p.80_81insQQ | -1.5  | Neutral     | NA   | NA        | NA    | NA                |
|     |    |           |           |   | TGCTGCT |     |      |                 |              |                 |              |       |             |      |           |       |                   |
| A76 | 10 | 23244839  | 23244839  | A | G       | 40  | 0.40 | <i>ARMC3</i>    | NM_173081    | Missense        | p.I90M       | -1.21 | Neutral     | 0.13 | Tolerated | 0.988 | probably damaging |
| A76 | 17 | 29214270  | 29214270  | A | G       | 52  | 0.31 | <i>ATAD5</i>    | NM_024857    | Missense        | p.K1380E     | -1.29 | Neutral     | 0.47 | Tolerated | 0.483 | possibly damaging |
| A76 | 13 | 47469878  | 47469878  | A | C       | 86  | 0.35 | <i>HTR2A</i>    | NM_000621    | Missense        | p.L55R       | -1.56 | Neutral     | 0.34 | Tolerated | 0.856 | possibly damaging |
| A76 | 8  | 77767964  | 77767964  | T | A       | 144 | 0.37 | <i>ZFHX4</i>    | NM_024721    | Missense        | p.M2936K     | -5.6  | Deleterious | 0    | Damaging  | 0.947 | possibly damaging |
| A76 | 12 | 66709139  | 66709139  | A | G       | 21  | 0.29 | <i>HELB</i>     | NM_033647    | Missense        | p.Q659R      | -1.48 | Neutral     | NA   | NA        | 0.136 | benign            |
| A76 | 17 | 9066277   | 9066277   | G | A       | 24  | 0.50 | <i>NTN1</i>     | NM_004822    | Missense        | p.R389H      | -4.51 | Deleterious | 0.03 | Damaging  | 1     | probably damaging |
| A76 | 15 | 40861552  | 40861552  | C | A       | 46  | 0.33 | <i>RPUSD2</i>   | NM_152260    | Missense        | p.R6S        | 0.05  | Neutral     | 0.6  | Tolerated | 0.001 | benign            |
| A76 | 2  | 102992512 | 102992512 | C | A       | 24  | 0.38 | <i>IL18R1</i>   | NM_003855    | Missense        | p.T205K      | -2.11 | Neutral     | 1    | Tolerated | 0.211 | benign            |
| A76 | 12 | 49937785  | 49937785  | C | T       | 52  | 0.42 | <i>KCNH3</i>    | NM_012284    | Missense        | p.T304I      | -4.27 | Deleterious | 0.03 | Damaging  | 0.967 | probably damaging |
| A76 | 17 | 35825723  | 35825723  | G | T       | 53  | 0.30 | <i>TADA2A</i>   | NM_133439    | Missense        | p.V301L      | 0.43  | Neutral     | NA   | NA        | 0     | benign            |
| A76 | 4  | 17826660  | 17826660  | G | A       | 74  | 0.30 | <i>NCAPG</i>    | NM_022346    | Missense        | p.V485I      | -0.42 | Neutral     | 0.34 | Tolerated | 0     | benign            |
| A77 | 2  | 51254919  | 51254919  | C | T       | 92  | 0.12 | <i>NRXN1</i>    | NM_001135659 | Missense        | p.A165T      | -0.26 | Neutral     | 0.58 | Tolerated | 0.599 | possibly damaging |
| A77 | 6  | 93956694  | 93956694  | C | T       | 82  | 0.44 | <i>EPHA7</i>    | NM_004440    | Missense        | p.A848T      | -3.01 | Deleterious | 0    | Damaging  | 1     | probably damaging |
| A77 | 11 | 9202620   | 9202620   | G | C       | 31  | 0.32 | <i>DENND5A</i>  | NM_015213    | Missense        | p.C383W      | -9.29 | Deleterious | 0    | Damaging  | 1     | probably damaging |
| A77 | 4  | 187197453 | 187197453 | G | A       | 99  | 0.41 | <i>F11</i>      | NM_000128    | Missense        | p.D222N      | -2.89 | Deleterious | 0.05 | Damaging  | 1     | probably damaging |
| A77 | 10 | 90362351  | 90362351  | T | G       | 52  | 0.44 | <i>LIPJ</i>     | NM_001010939 | Missense        | p.F248V      | 0.65  | Neutral     | 0.5  | Tolerated | 0     | benign            |
| A77 | 2  | 21229928  | 21229928  | C | T       | 178 | 0.43 | <i>APOB</i>     | NM_000384    | Missense        | p.G3271D     | -2.75 | Deleterious | 0.03 | Damaging  | 0.216 | benign            |
| A77 | 11 | 88242508  | 88242508  | C | T       | 44  | 0.55 | <i>GRM5</i>     | NM_001143831 | Missense        | p.G964D      | -0.02 | Neutral     | NA   | NA        | 0.065 | benign            |
| A77 | 3  | 154024012 | 154024012 | G | A       | 62  | 0.52 | <i>DHX36</i>    | NM_020865    | Missense        | p.L296F      | -3.32 | Deleterious | 0.05 | Damaging  | 0.915 | possibly damaging |
| A77 | 17 | 2218996   | 2218996   | C | A       | 130 | 0.46 | <i>SRR</i>      | NM_021947    | Missense        | p.L48I       | -0.37 | Neutral     | 0.05 | Damaging  | 0.007 | benign            |
| A77 | 17 | 37627965  | 37627965  | T | C       | 90  | 0.29 | <i>CDK12</i>    | NM_016507    | Missense        | p.L627S      | -3.76 | Deleterious | 0.08 | Tolerated | 1     | probably damaging |
| A77 | 14 | 20345201  | 20345201  | A | C       | 230 | 0.41 | <i>OR4K2</i>    | NM_001005501 | Missense        | p.M259L      | 0.22  | Neutral     | 0.35 | Tolerated | 0     | benign            |
| A77 | X  | 129148441 | 129148441 | C | T       | 39  | 0.59 | <i>BCORL1</i>   | NM_021946    | nonsense        | p.Q565_      | NA    | NA          | 0.53 | Tolerated | NA    | NA                |
| A77 | 5  | 169535116 | 169535116 | G | A       | 114 | 0.42 | <i>FOXJ1</i>    | NM_012188    | Missense        | p.R213H      | -4.37 | Deleterious | 0.01 | Damaging  | 1     | probably damaging |
| A77 | 13 | 113333772 | 113333772 | C | T       | 41  | 0.59 | <i>C13orf35</i> | NM_207440    | Missense        | p.R27C       | -8    | Deleterious | 0    | Damaging  | 0.009 | benign            |
| A77 | 7  | 128478704 | 128478704 | C | T       | 62  | 0.50 | <i>FLNC</i>     | NM_001458    | Missense        | p.R420W      | -4.52 | Deleterious | 0    | Damaging  | 0.996 | probably damaging |
| A77 | 7  | 14880851  | 14880851  | G | A       | 110 | 0.50 | <i>DGKB</i>     | NM_004080    | Missense        | p.S13L       | -1.68 | Neutral     | 0.13 | Tolerated | 0.001 | benign            |
| A77 | 2  | 55277417  | 55277417  | G | GCC     | 54  | 0.44 | <i>RTN4</i>     | NM_020532    | Frame_Shift_Ins | p.S7fs       | NA    | NA          | NA   | NA        | NA    | NA                |
| A77 | 6  | 10956435  | 10956435  | C | A       | 48  | 0.58 | <i>SYCP2L</i>   | NM_001040274 | Missense        | p.T708N      | -1.81 | Neutral     | 0.04 | Damaging  | 0.125 | benign            |

|     |    |           |           |    |    |     |      |                |              |                 |          |       |             |      |           |       |                   |
|-----|----|-----------|-----------|----|----|-----|------|----------------|--------------|-----------------|----------|-------|-------------|------|-----------|-------|-------------------|
| A77 | 2  | 175436688 | 175436688 | A  | C  | 31  | 0.39 | <i>WIPF1</i>   | NM_003387    | Missense        | p.V282G  | -0.53 | Neutral     | 0.43 | Tolerated | 0     | benign            |
| A77 | 18 | 50866208  | 50866208  | G  | A  | 121 | 0.36 | <i>DCC</i>     | NM_005215    | Missense        | p.V764I  | 0.03  | Neutral     | 0.97 | Tolerated | 0.009 | benign            |
| A78 | 19 | 56125165  | 56125165  | G  | GC | 14  | 0.14 | <i>ZNF865</i>  | NM_001195605 | Frame_Shift_Ins | p.A61fs  | NA    | NA          | NA   | NA        | NA    | NA                |
| A78 | 3  | 51459856  | 51459856  | T  | C  | 78  | 0.44 | <i>VPRBP</i>   | NM_014703    | Missense        | p.D572G  | -5.9  | Deleterious | 0    | Damaging  | 0.996 | probably damaging |
| A78 | 3  | 4829742   | 4829742   | G  | A  | 122 | 0.45 | <i>ITPRI</i>   | NM_001168272 | Missense        | p.E2228K | -3.45 | Deleterious | 0.55 | Tolerated | 0.31  | benign            |
| A78 | 1  | 119964611 | 119964611 | A  | G  | 72  | 0.49 | <i>HSD3B2</i>  | NM_001166120 | Missense        | p.K163E  | -1.78 | Neutral     | NA   | NA        | 0.333 | benign            |
| A78 | 9  | 37020673  | 37020673  | G  | A  | 38  | 0.61 | <i>PAX5</i>    | NM_016734    | Missense        | p.L58F   | -3.31 | Deleterious | 0    | Damaging  | 1     | probably damaging |
| A78 | 2  | 238249317 | 238249317 | G  | A  | 56  | 0.43 | <i>COL6A3</i>  | NM_004369    | Missense        | p.P2748S | 1.52  | Neutral     | 0.65 | Tolerated | 0.896 | possibly damaging |
| A78 | 12 | 133158342 | 133158342 | C  | T  | 43  | 0.37 | <i>FBRSL1</i>  | NM_001142641 | Missense        | p.P686L  | -5.17 | Deleterious | 0.03 | Damaging  | 0.997 | probably damaging |
| A78 | 1  | 228033691 | 228033691 | C  | T  | 94  | 0.49 | <i>PRSS38</i>  | NM_183062    | Missense        | p.R255C  | -2.89 | Deleterious | 0.06 | Tolerated | 0.993 | probably damaging |
| A78 | 7  | 82389989  | 82389989  | C  | T  | 66  | 0.59 | <i>PCLO</i>    | NM_033026    | Missense        | p.R5085Q | -1.87 | Neutral     | 0    | Damaging  | 1     | probably damaging |
| A78 | 6  | 34985808  | 34985808  | C  | T  | 36  | 0.42 | <i>ANKS1A</i>  | NM_015245    | Missense        | p.S661L  | -1.11 | Neutral     | 0    | Damaging  | 0.993 | probably damaging |
| A79 | 2  | 160803306 | 160803306 | A  | T  | 107 | 0.48 | <i>PLA2R1</i>  | NM_001007267 | Missense        | p._1325R | NA    | NA          | NA   | NA        | NA    | NA                |
| A79 | 6  | 159134895 | 159134895 | G  | A  | 87  | 0.44 | <i>SYTL3</i>   | NM_001242384 | Missense        | p.A194T  | 1.84  | Neutral     | 0.9  | Tolerated | 0     | benign            |
| A79 | 1  | 117150792 | 117150792 | C  | T  | 92  | 0.14 | <i>IGSF3</i>   | NM_001542    | Missense        | p.A332T  | -2.38 | Neutral     | 0.06 | Tolerated | 1     | probably damaging |
| A79 | 5  | 35694388  | 35694388  | AG | A  | 128 | 0.48 | <i>SPEF2</i>   | NM_024867    | Splice Site     | p.D634sp | NA    | NA          | NA   | NA        | NA    | NA                |
| A79 | 3  | 113002338 | 113002338 | G  | C  | 44  | 0.43 | <i>BOC</i>     | NM_033254    | Missense        | p.E838Q  | -0.57 | Neutral     | 0.4  | Tolerated | 0.763 | possibly damaging |
| A79 | 4  | 70146573  | 70146573  | T  | C  | 19  | 0.84 | <i>UGT2B28</i> | NM_053039    | Missense        | p.F119L  | -2.77 | Deleterious | 0.32 | Tolerated | 0     | benign            |
| A79 | 14 | 105349434 | 105349434 | C  | T  | 66  | 0.48 | <i>CEP170B</i> | NM_001112726 | Missense        | p.P214S  | -1.97 | Neutral     | 0.08 | Tolerated | 0.437 | benign            |
| A79 | 20 | 51872999  | 51872999  | G  | A  | 77  | 0.43 | <i>TSHZ2</i>   | NM_173485    | Missense        | p.R1001Q | -2.33 | Neutral     | 0    | Damaging  | 1     | probably damaging |
| A79 | 22 | 35478615  | 35478615  | C  | T  | 112 | 0.47 | <i>ISX</i>     | NM_001008494 | Missense        | p.R112C  | -7.97 | Deleterious | 0    | Damaging  | 1     | probably damaging |
| A79 | 4  | 84222252  | 84222252  | A  | G  | 34  | 0.41 | <i>HPSE</i>    | NM_001098540 | Missense        | p.Y445H  | -3.75 | Deleterious | 0.24 | Tolerated | 1     | probably damaging |
| A81 | 11 | 396953    | 396953    | C  | A  | 33  | 0.52 | <i>PKP3</i>    | NM_007183    | Missense        | p.A151D  | -1.15 | Neutral     | 0.22 | Tolerated | 0.01  | benign            |
| A81 | 20 | 33570359  | 33570359  | G  | A  | 67  | 0.16 | <i>MYH7B</i>   | NM_020884    | Splice Site     | p.A250sp | NA    | NA          | NA   | NA        | NA    | NA                |
| A81 | 11 | 64118671  | 64118671  | G  | C  | 33  | 0.42 | <i>CCDC88B</i> | NM_032251    | Missense        | p.A968P  | -2.1  | Neutral     | 0.21 | Tolerated | 0.764 | possibly damaging |
| A81 | 7  | 148801201 | 148801201 | C  | T  | 103 | 0.50 | <i>ZNF425</i>  | NM_001001661 | Missense        | p.D588N  | 0.98  | Neutral     | 0    | Damaging  | 0.009 | benign            |

CTTTAGT

CCCCTCT

AACTGCA

|     |   |          |          |   |         |     |      |              |           |              |                            |      |         |    |    |    |    |
|-----|---|----------|----------|---|---------|-----|------|--------------|-----------|--------------|----------------------------|------|---------|----|----|----|----|
| A81 | 8 | 10467581 | 10467581 | C | CCCCCTC | 242 | 0.50 | <i>RP1L1</i> | NM_178857 | In_Frame_Ins | p.1341_1342in<br>sKTEEGLQE | 2.53 | Neutral | NA | NA | NA | NA |
|-----|---|----------|----------|---|---------|-----|------|--------------|-----------|--------------|----------------------------|------|---------|----|----|----|----|

TTCTTGC

AGCCCTT

CTTCTGT

EGVQLEGT

|     |    |           |           |     |               |     |      |                 |              |                 |            |       |             |      |           |       |                   |
|-----|----|-----------|-----------|-----|---------------|-----|------|-----------------|--------------|-----------------|------------|-------|-------------|------|-----------|-------|-------------------|
| A81 | 17 | 29667602  | 29667602  | G   | A             | 48  | 0.73 | <i>NF1</i>      | NM_001042492 | Missense        | p.G2334D   | -5.74 | Deleterious | 0    | Damaging  | 1     | probably damaging |
| A81 | 2  | 74317152  | 74317152  | T   | C             | 25  | 0.24 | <i>TET3</i>     | NM_144993    | Missense        | p.L871P    | -6.61 | Deleterious | 0    | Damaging  | 1     | probably damaging |
| A81 | X  | 23748991  | 23748991  | G   | T             | 53  | 0.25 | <i>ACOT9</i>    | NM_001037171 | Missense        | p.P102T    | -7.48 | Deleterious | 0    | Damaging  | 1     | probably damaging |
| A81 | 17 | 18138002  | 18138002  | G   | A             | 68  | 0.10 | <i>LLGL1</i>    | NM_004140    | Missense        | p.R297Q    | -0.6  | Neutral     | 0.58 | Tolerated | 0.473 | possibly damaging |
| A81 | X  | 135741495 | 135741495 | C   | T             | 50  | 0.52 | <i>CD40LG</i>   | NM_000074    | Missense        | p.S236L    | -2.22 | Neutral     | 0.34 | Tolerated | 1     | probably damaging |
| A81 | 3  | 14862098  | 14862098  | C   | T             | 111 | 0.12 | <i>FGD5</i>     | NM_152536    | Missense        | p.S507L    | -0.29 | Neutral     | 0.16 | Tolerated | 0.014 | benign            |
| A81 | 19 | 15073150  | 15073150  | G   | A             | 73  | 0.48 | <i>SLCIA6</i>   | NM_005071    | Missense        | p.T200M    | -5.18 | Deleterious | 0    | Damaging  | 1     | probably damaging |
| A81 | 17 | 73500739  | 73500739  | C   | T             | 28  | 0.54 | <i>CASKIN2</i>  | NM_020753    | Missense        | p.V410M    | -1.12 | Neutral     | 0.19 | Tolerated | 0.93  | possibly damaging |
| A82 | 14 | 73678524  | 73678524  | G   | A             | 130 | 0.22 | <i>PSEN1</i>    | NM_000021    | Missense        | p.G335R    | -4.34 | Deleterious | 0.14 | Tolerated | 1     | probably damaging |
| A82 | 9  | 101507924 | 101507924 | C   | T             | 41  | 0.37 | <i>ANKS6</i>    | NM_173551    | Missense        | p.G810S    | -2.55 | Deleterious | 0.12 | Tolerated | 1     | probably damaging |
| A82 | 2  | 79385823  | 79385823  | T   | G             | 30  | 0.30 | <i>REG3A</i>    | NM_138938    | Missense        | p.H50P     | -5.18 | Deleterious | 0.04 | Damaging  | 0.653 | possibly damaging |
| A82 | 10 | 67680133  | 67680133  | A   | C             | 104 | 0.10 | <i>CTNNA3</i>   | NM_001127384 | Missense        | p.H881Q    | -0.57 | Neutral     | 0.31 | Tolerated | 0.92  | possibly damaging |
| A82 | 11 | 6661346   | 6661346   | G   | C             | 45  | 0.31 | <i>DCHS1</i>    | NM_003737    | Missense        | p.P500R    | -0.21 | Neutral     | 0.58 | Tolerated | 0.394 | benign            |
| A82 | 19 | 758297    | 758297    | T   | A             | 57  | 0.53 | <i>CI9orf21</i> | NM_173481    | Missense        | p.S451T    | -0.93 | Neutral     | 0.25 | Tolerated | 0.782 | possibly damaging |
| A83 | 22 | 46860089  | 46860089  | G   | A             | 90  | 0.43 | <i>CELSR1</i>   | NM_014246    | Missense        | p.A1233V   | -2.52 | Deleterious | 0.02 | Damaging  | 0.599 | possibly damaging |
| A83 | 2  | 3651923   | 3651923   | C   | T             | 67  | 0.46 | <i>COLEC11</i>  | NM_001255985 | Missense        | p.A12V     | -0.82 | Neutral     | 0.77 | Tolerated | NA    | NA                |
| A83 | 5  | 179393977 | 179393977 | C   | T             | 117 | 0.13 | <i>RNF130</i>   | NM_018434    | Missense        | p.D327N    | -2.79 | Deleterious | 0.1  | Tolerated | 1     | probably damaging |
| A83 | 8  | 28196924  | 28196924  | A   | AG            | 129 | 0.39 | <i>PNOC</i>     | NM_006228    | Frame_Shift_Ins | p.G165fs   | NA    | NA          | NA   | NA        | NA    | NA                |
| A83 | 2  | 179486730 | 179486730 | CTT | C             | 72  | 0.43 | <i>TTN</i>      | NM_001267550 | Frame_Shift_Del | p.K13332fs | NA    | NA          | NA   | NA        | NA    | NA                |
| A83 | X  | 76937435  | 76937435  | G   | A             | 80  | 0.98 | <i>ATRX</i>     | NM_000489    | nonsense        | p.Q1105_   | NA    | NA          | 1    | Tolerated | NA    | NA                |
| A83 | 17 | 12862139  | 12862139  | G   | A             | 121 | 0.50 | <i>ARHGAP44</i> | NM_014859    | Missense        | p.R483H    | -1.95 | Neutral     | 0.05 | Damaging  | 0.996 | probably damaging |
| A83 | 9  | 131122742 | 131122742 | G   | A             | 73  | 0.11 | <i>SLC27A4</i>  | NM_005094    | Missense        | p.R635H    | -1.71 | Neutral     | 0.12 | Tolerated | 0.417 | benign            |
| A83 | X  | 78216060  | 78216060  | A   | G             | 81  | 0.94 | <i>P2RY10</i>   | NM_198333    | Missense        | p.S15G     | -0.42 | Neutral     | 0.2  | Tolerated | 0     | benign            |
| A83 | 16 | 86544959  | 86544959  | G   | A             | 31  | 0.39 | <i>FOXF1</i>    | NM_001451    | Missense        | p.V262I    | -0.4  | Neutral     | 0.39 | Tolerated | 0.939 | possibly damaging |
| A83 | 7  | 148504766 | 148504766 | C   | CCTCGTC<br>GA | 35  | 0.14 | <i>EZH2</i>     | NM_004456    | Frame_Shift_Ins | p.G738fs   | NA    | NA          | NA   | NA        | NA    | NA                |
| A84 | 5  | 878576    | 878576    | C   | T             | 24  | 0.25 | <i>BRD9</i>     | NM_023924    | Missense        | p.A389T    | -0.44 | Neutral     | 0.09 | Tolerated | 0.304 | benign            |
| A84 | 21 | 47676815  | 47676815  | C   | T             | 28  | 0.21 | <i>MCM3AP</i>   | NM_003906    | Missense        | p.D1274N   | -0.29 | Neutral     | 0.47 | Tolerated | 0.002 | benign            |
| A84 | 9  | 138011881 | 138011881 | G   | A             | 77  | 0.22 | <i>OLFM1</i>    | NM_014279    | Missense        | p.D421N    | -2.85 | Deleterious | 0.02 | Damaging  | 1     | probably damaging |
| A84 | 17 | 73234397  | 73234397  | T   | C             | 35  | 0.34 | <i>GGA3</i>     | NM_138619    | Missense        | p.D712G    | -4.45 | Deleterious | 0.03 | Damaging  | 0.732 | possibly damaging |
| A84 | 19 | 40392585  | 40392585  | T   | G             | 20  | 0.20 | <i>FCGBP</i>    | NM_003890    | Missense        | p.E2640A   | -1.4  | Neutral     | 0.49 | Tolerated | 0.057 | benign            |
| A84 | 11 | 47611462  | 47611462  | C   | T             | 81  | 0.15 | <i>CIQTNF4</i>  | NM_031909    | Missense        | p.G301S    | -0.77 | Neutral     | 0.41 | Tolerated | 0.999 | probably damaging |
| A84 | 4  | 109784483 | 109784483 | C   | T             | 33  | 0.18 | <i>COL25A1</i>  | NM_198721    | Missense        | p.G382R    | -7.43 | Deleterious | NA   | NA        | 1     | probably damaging |

|     |    |           |           |   |    |     |      |                 |              |                 |           |       |             |      |           |       |                   |
|-----|----|-----------|-----------|---|----|-----|------|-----------------|--------------|-----------------|-----------|-------|-------------|------|-----------|-------|-------------------|
| A84 | 11 | 82705142  | 82705142  | C | G  | 80  | 0.19 | <i>RAB30</i>    | NM_014488    | Missense        | p.G39A    | -2.89 | Deleterious | NA   | NA        | 0.977 | probably damaging |
| A84 | 3  | 6903265   | 6903265   | G | A  | 53  | 0.17 | <i>GRM7</i>     | NM_181874    | Missense        | p.G64R    | -3.98 | Deleterious | 0.21 | Tolerated | 1     | probably damaging |
| A84 | 11 | 120298874 | 120298874 | A | C  | 34  | 0.35 | <i>ARHGEF12</i> | NM_015313    | Missense        | p.H168P   | -2.01 | Neutral     | 0.12 | Tolerated | 0.01  | benign            |
| A84 | 2  | 238402172 | 238402172 | C | T  | 24  | 0.21 | <i>MLPH</i>     | NM_024101    | Missense        | p.R35W    | -7.22 | Deleterious | 0.02 | Damaging  | 1     | probably damaging |
| A84 | 3  | 194080646 | 194080646 | C | T  | 41  | 0.20 | <i>LRRRC15</i>  | NM_001135057 | Missense        | p.R382H   | -2.7  | Deleterious | 0.18 | Tolerated | 0.054 | benign            |
| A84 | 12 | 121177160 | 121177160 | G | A  | 41  | 0.17 | <i>ACADS</i>    | NM_000017    | Missense        | p.R383H   | -4.89 | Deleterious | 0    | Damaging  | 1     | probably damaging |
| A84 | 18 | 24127308  | 24127308  | C | A  | 104 | 0.23 | <i>KCTD1</i>    | NM_001142730 | Missense        | p.R398L   | 0.22  | Neutral     | 1    | Tolerated | NA    | NA                |
| A84 | 12 | 41946474  | 41946474  | G | A  | 28  | 0.21 | <i>PDZRN4</i>   | NM_001164595 | Missense        | p.R407H   | -3.95 | Deleterious | 0    | Damaging  | 1     | probably damaging |
| A84 | 5  | 140221099 | 140221099 | C | T  | 27  | 0.26 | <i>PCDHA8</i>   | NM_018911    | Missense        | p.R65W    | -7.28 | Deleterious | 0    | Damaging  | 1     | probably damaging |
| A84 | 4  | 175898762 | 175898762 | C | T  | 40  | 0.18 | <i>ADAM29</i>   | NM_001130704 | nonsense        | p.R696_   | NA    | NA          | NA   | NA        | NA    | NA                |
| A84 | 19 | 48342778  | 48342778  | T | C  | 73  | 0.11 | <i>CRX</i>      | NM_000554    | Missense        | p.S152P   | -1.57 | Neutral     | 0.35 | Tolerated | 0.015 | benign            |
| A84 | 10 | 93771059  | 93771059  | T | TA | 34  | 0.29 | <i>BTAF1</i>    | NM_003972    | Frame_Shift_Ins | p.Y1400fs | NA    | NA          | NA   | NA        | NA    | NA                |
| A84 | 11 | 30255160  | 30255160  | C | T  | 38  | 0.37 | <i>FSHB</i>     | NM_000510    | Missense        | p.T68I    | 0.83  | Neutral     | 0.21 | Tolerated | 0.001 | benign            |
| A84 | X  | 153581667 | 153581667 | C | T  | 52  | 0.77 | <i>FLNA</i>     | NM_001110556 | Missense        | p.V2007M  | -1.88 | Neutral     | 0.04 | Damaging  | 1     | probably damaging |
| A85 | 19 | 36125228  | 36125228  | C | T  | 32  | 0.44 | <i>RBM42</i>    | NM_024321    | Missense        | p.A363V   | -3.38 | Deleterious | 0.02 | Damaging  | 0.984 | probably damaging |
| A85 | 1  | 155874287 | 155874287 | A | G  | 32  | 0.53 | <i>RIT1</i>     | NM_001256821 | Missense        | p.F99L    | -5.29 | Deleterious | 0.05 | Damaging  | 0.996 | probably damaging |
| A85 | 1  | 115258747 | 115258747 | C | T  | 37  | 0.35 | <i>NRAS</i>     | NM_002524    | Missense        | p.G12D    | -5.35 | Deleterious | 0    | Damaging  | 0.372 | benign            |
| A85 | 22 | 44277505  | 44277505  | C | T  | 22  | 0.41 | <i>PNPLA5</i>   | NM_138814    | Missense        | p.G378S   | -1.13 | Neutral     | 0.75 | Tolerated | 0.976 | probably damaging |
| A85 | 7  | 50132775  | 50132775  | G | A  | 15  | 0.27 | <i>ZPBP</i>     | NM_007009    | Missense        | p.L6F     | -0.62 | Neutral     | NA   | NA        | 0.454 | possibly damaging |
| A85 | 19 | 35719114  | 35719114  | G | A  | 69  | 0.57 | <i>FAM187B</i>  | NM_152481    | Missense        | p.P157L   | -5.5  | Deleterious | 0.19 | Tolerated | 0.606 | possibly damaging |
| A85 | 3  | 97311534  | 97311534  | C | T  | 37  | 0.54 | <i>EPHA6</i>    | NM_001080448 | Missense        | p.P822L   | -0.57 | Neutral     | 0.01 | Damaging  | 0.957 | probably damaging |
| A85 | 12 | 58152021  | 58152021  | G | A  | 60  | 0.53 | <i>MAR9</i>     | NM_138396    | Missense        | p.R215Q   | -3.09 | Deleterious | 0.04 | Damaging  | 1     | probably damaging |
| A85 | 19 | 6495758   | 6495758   | C | T  | 25  | 0.40 | <i>TUBB4A</i>   | NM_006087    | Missense        | p.R251H   | -4.36 | Deleterious | 0    | Damaging  | 0.414 | benign            |
| A85 | 2  | 158991382 | 158991382 | C | T  | 40  | 0.38 | <i>UPP2</i>     | NM_001135098 | Missense        | p.R369W   | -2.48 | Neutral     | 0.04 | Damaging  | 0.012 | benign            |
| A85 | 16 | 88677775  | 88677775  | C | T  | 32  | 0.56 | <i>ZC3H18</i>   | NM_144604    | nonsense        | p.R436_   | NA    | NA          | 1    | Tolerated | NA    | NA                |
| A85 | 11 | 47362770  | 47362770  | C | T  | 41  | 0.49 | <i>MYBPC3</i>   | NM_000256    | Missense        | p.V606I   | -0.8  | Neutral     | 0.01 | Damaging  | 0.897 | possibly damaging |
| A85 | 9  | 35295775  | 35295775  | C | G  | 27  | 0.93 | <i>UNC13B</i>   | NM_006377    | nonsense        | p.Y203_   | NA    | NA          | 1    | Tolerated | NA    | NA                |
| A86 | 20 | 2308958   | 2308958   | C | T  | 47  | 0.21 | <i>TGM3</i>     | NM_003245    | Missense        | p.A427V   | -3.12 | Deleterious | 0.02 | Damaging  | 1     | probably damaging |
| A86 | 15 | 98982959  | 98982959  | T | G  | 50  | 0.26 | <i>FAM169B</i>  | NM_182562    | Missense        | p.E160D   | -1.18 | Neutral     | 0.23 | Tolerated | 0.939 | possibly damaging |
| A86 | 4  | 126242091 | 126242091 | C | T  | 137 | 0.42 | <i>FAT4</i>     | NM_024582    | Missense        | p.R1509W  | -2.52 | Deleterious | 0.03 | Damaging  | 1     | probably damaging |
| A86 | 20 | 56137878  | 56137878  | C | T  | 39  | 0.51 | <i>PCK1</i>     | NM_002591    | Missense        | p.T178M   | -1.18 | Neutral     | 0.12 | Tolerated | 0.007 | benign            |
| A86 | 14 | 93424630  | 93424630  | C | T  | 45  | 0.42 | <i>ITPK1</i>    | NM_014216    | Missense        | p.V196I   | -0.34 | Neutral     | 0.21 | Tolerated | 0.814 | possibly damaging |
| A86 | 2  | 1440127   | 1440127   | C | A  | 75  | 0.21 | <i>TPO</i>      | NM_001206744 | nonsense        | p.Y151_   | NA    | NA          | 1    | Tolerated | NA    | NA                |

|     |    |           |           |                     |       |     |      |                |              |                 |           |        |             |      |           |       |                   |
|-----|----|-----------|-----------|---------------------|-------|-----|------|----------------|--------------|-----------------|-----------|--------|-------------|------|-----------|-------|-------------------|
| A87 | 2  | 44051371  | 44051371  | C                   | G     | 146 | 0.23 | <i>ABCG5</i>   | NM_022436    | Missense        | p.G369R   | -1.83  | Neutral     | 0.35 | Tolerated | 0.75  | possibly damaging |
| A87 | 1  | 8422743   | 8422743   | C                   | A     | 30  | 0.30 | <i>RERE</i>    | NM_001042681 | Missense        | p.K634N   | -3.69  | Deleterious | NA   | NA        | 1     | probably damaging |
| A87 | 7  | 131853086 | 131853086 | GT                  | G     | 39  | 0.49 | <i>PLXNA4</i>  | NM_020911    | Frame_Shift_Del | p.N1421fs | NA     | NA          | NA   | NA        | NA    | NA                |
| A87 | 15 | 75656919  | 75656919  | C                   | T     | 29  | 0.31 | <i>MAN2C1</i>  | NM_001256494 | Missense        | p.M170I   | -1.42  | Neutral     | 0.39 | Tolerated | 0.076 | benign            |
| A87 | 7  | 50468140  | 50468140  | ATGAAGGTGT<br>ACAAG | A     | 51  | 0.24 | <i>IKZF1</i>   | NM_006060    | Frame_Shift_Del | p.M459fs  | NA     | NA          | NA   | NA        | NA    | NA                |
| A87 | 11 | 5969343   | 5969343   | G                   | A     | 131 | 0.50 | <i>OR56A3</i>  | NM_001003443 | Missense        | p.S256N   | -0.98  | Neutral     | 0    | Damaging  | 0.976 | probably damaging |
| A87 | 7  | 82791676  | 82791676  | G                   | T     | 19  | 0.68 | <i>PCLO</i>    | NM_033026    | nonsense        | p.S78_    | NA     | NA          | 0    | Damaging  | NA    | NA                |
| A87 | X  | 41064585  | 41064585  | T                   | TGA   | 34  | 0.68 | <i>USP9X</i>   | NM_001039590 | Frame_Shift_Ins | p.G1619fs | NA     | NA          | NA   | NA        | NA    | NA                |
| A87 | 12 | 83290111  | 83290111  | C                   | T     | 213 | 0.30 | <i>TMTC2</i>   | NM_152588    | Missense        | p.T390M   | -1.62  | Neutral     | 0.15 | Tolerated | 1     | probably damaging |
| A87 | 6  | 116821802 | 116821802 | T                   | C     | 40  | 0.18 | <i>BET3L</i>   | NM_001139444 | Missense        | p.T90A    | -3.77  | Deleterious | 0.02 | Damaging  | 0.98  | probably damaging |
| A87 | 1  | 155206089 | 155206089 | C                   | CACGT | 46  | 0.28 | <i>GBA</i>     | NM_000157    | Frame_Shift_Ins | p.V391fs  | NA     | NA          | NA   | NA        | NA    | NA                |
| A88 | 1  | 11217303  | 11217303  | C                   | G     | 95  | 0.23 | <i>MTOR</i>    | NM_004958    | Missense        | p.A1459P  | -4.35  | Deleterious | 0    | Damaging  | 0.856 | possibly damaging |
| A88 | 12 | 25378562  | 25378562  | C                   | T     | 40  | 0.28 | <i>KRAS</i>    | NM_033360    | Missense        | p.A146T   | -3.63  | Deleterious | 0.01 | Damaging  | 1     | probably damaging |
| A88 | 7  | 77824190  | 77824190  | C                   | T     | 20  | 0.65 | <i>MAGI2</i>   | NM_012301    | Splice Site     | p.A155sp  | NA     | NA          | NA   | NA        | NA    | NA                |
| A88 | 15 | 78568008  | 78568008  | G                   | A     | 55  | 0.55 | <i>DNAJA4</i>  | NM_018602    | Missense        | p.C301Y   | -10.52 | Deleterious | 0.02 | Damaging  | 0.988 | probably damaging |
| A88 | 2  | 97817617  | 97817617  | T                   | C     | 72  | 0.15 | <i>ANKRD36</i> | NM_001164315 | Missense        | p.I368T   | -0.09  | Neutral     | 1    | Tolerated | 0     | benign            |
| A88 | 17 | 30300238  | 30300238  | C                   | CA    | 27  | 0.41 | <i>SUZ12</i>   | NM_015355    | Frame_Shift_Ins | p.L194fs  | NA     | NA          | NA   | NA        | NA    | NA                |
| A88 | 17 | 48538118  | 48538118  | A                   | G     | 114 | 0.45 | <i>ACSF2</i>   | NM_025149    | Missense        | p.N70S    | 1.04   | Neutral     | 0.25 | Tolerated | 0     | benign            |
| A88 | 5  | 137221838 | 137221838 | C                   | T     | 33  | 0.42 | <i>MYOT</i>    | NM_006790    | Missense        | p.P376S   | -7.21  | Deleterious | 0    | Damaging  | 1     | probably damaging |
| A88 | 12 | 49446026  | 49446026  | AG                  | A     | 62  | 0.50 | <i>MLL2</i>    | NM_003482    | Frame_Shift_Del | p.P480fs  | NA     | NA          | NA   | NA        | NA    | NA                |
| A88 | 21 | 47805823  | 47805823  | G                   | A     | 142 | 0.44 | <i>PCNT</i>    | NM_006031    | Missense        | p.R1130Q  | -3.19  | Deleterious | 0.16 | Tolerated | 0.999 | probably damaging |
| A88 | 2  | 209113113 | 209113113 | G                   | A     | 37  | 0.54 | <i>IDH1</i>    | NM_005896    | Missense        | p.R132C   | -6.68  | Deleterious | 0    | Damaging  | 0.259 | benign            |
| A88 | 22 | 38318086  | 38318086  | G                   | A     | 64  | 0.50 | <i>MICALL1</i> | NM_033386    | Missense        | p.R226Q   | -0.99  | Neutral     | 0.6  | Tolerated | 0.013 | benign            |
| A88 | 9  | 119461030 | 119461030 | A                   | T     | 91  | 0.19 | <i>TRIM32</i>  | NM_012210    | Missense        | p.R337W   | -2.21  | Neutral     | NA   | NA        | 0.613 | possibly damaging |
| A88 | 17 | 47869344  | 47869344  | C                   | T     | 26  | 0.35 | <i>KAT7</i>    | NM_007067    | nonsense        | p.R38_    | NA     | NA          | 0.71 | Tolerated | NA    | NA                |
| A88 | 19 | 6919676   | 6919676   | C                   | A     | 30  | 0.20 | <i>EMRI</i>    | NM_001974    | Missense        | p.S513Y   | -4.93  | Deleterious | 0    | Damaging  | 1     | probably damaging |
| A88 | 16 | 2224261   | 2224261   | A                   | G     | 52  | 0.29 | <i>TRAF7</i>   | NM_032271    | Missense        | p.T425A   | -1.8   | Neutral     | 0.35 | Tolerated | 0.045 | benign            |
| A88 | 2  | 210560393 | 210560393 | G                   | A     | 145 | 0.38 | <i>MAP2</i>    | NM_002374    | Missense        | p.V1167I  | -0.36  | Neutral     | 0.99 | Tolerated | 0.004 | benign            |
| A89 | 11 | 57886004  | 57886004  | C                   | T     | 34  | 0.29 | <i>OR9I1</i>   | NM_001005211 | Missense        | p.A305T   | 0.11   | Neutral     | 0.26 | Tolerated | 0     | benign            |
| A89 | 1  | 89279387  | 89279387  | T                   | A     | 133 | 0.44 | <i>PKN2</i>    | NM_006256    | Missense        | p.H750Q   | -7.49  | Deleterious | 0.15 | Tolerated | 0.966 | probably damaging |
| A89 | 12 | 6701206   | 6701206   | A                   | G     | 25  | 0.16 | <i>CHD4</i>    | NM_001273    | Missense        | p.I989T   | -4.62  | Deleterious | 0    | Damaging  | 0.99  | probably damaging |
| A89 | 15 | 93545433  | 93545433  | G                   | GA    | 41  | 0.24 | <i>CHD2</i>    | NM_001271    | Frame_Shift_Ins | p.K1389fs | NA     | NA          | NA   | NA        | NA    | NA                |

|     |    |           |           |            |   |     |      |                 |              |              |            |       |             |      |           |       |                   |
|-----|----|-----------|-----------|------------|---|-----|------|-----------------|--------------|--------------|------------|-------|-------------|------|-----------|-------|-------------------|
| A89 | 1  | 175129924 | 175129924 | CCTTCTTCTT | C | 15  | 0.67 | <i>KLAA0040</i> | NM_014656    | In_Frame_Del | p.KKK73del | NA    | NA          | NA   | NA        | NA    | NA                |
| A89 | 19 | 13226834  | 13226834  | T          | C | 27  | 0.52 | <i>TRMT1</i>    | NM_017722    | Missense     | p.Q96R     | -0.84 | Neutral     | 0.46 | Tolerated | 0.003 | benign            |
| A89 | X  | 138882259 | 138882259 | G          | A | 49  | 0.16 | <i>ATP11C</i>   | NM_173694    | nonsense     | p.R227_    | NA    | NA          | 0.43 | Tolerated | NA    | NA                |
| A89 | 1  | 162824686 | 162824686 | G          | A | 86  | 0.45 | <i>C1orf110</i> | NM_178550    | Missense     | p.R260W    | -5.6  | Deleterious | 0.09 | Tolerated | 0.877 | possibly damaging |
| A89 | 3  | 52668826  | 52668826  | G          | A | 50  | 0.34 | <i>PBRM1</i>    | NM_018313    | Missense     | p.R365C    | -0.62 | Neutral     | 0.05 | Damaging  | 0.999 | probably damaging |
| A89 | 6  | 47846760  | 47846760  | C          | T | 136 | 0.29 | <i>PTCHD4</i>   | NM_001013732 | Missense     | p.R607H    | -4.14 | Deleterious | 0.4  | Tolerated | 1     | probably damaging |
| A89 | 2  | 27276857  | 27276857  | T          | C | 80  | 0.30 | <i>AGBL5</i>    | NM_021831    | Missense     | p.Y161H    | -4.67 | Deleterious | NA   | NA        | 1     | probably damaging |
| A90 | 13 | 92345963  | 92345963  | C          | T | 54  | 0.43 | <i>GPC5</i>     | NM_004466    | Missense     | p.A283V    | -3.5  | Deleterious | 0.07 | Tolerated | 0.987 | probably damaging |
| A90 | 14 | 72818810  | 72818810  | ACAT       | A | 61  | 0.34 | <i>RGS6</i>     | NM_001204424 | In_Frame_Del | p.I33del   | -9.03 | Deleterious | NA   | NA        | NA    | NA                |
| A90 | 3  | 193176998 | 193176998 | C          | A | 44  | 0.57 | <i>ATP13A4</i>  | NM_032279    | Missense     | p.A516S    | -0.49 | Neutral     | 0.82 | Tolerated | 0.002 | benign            |
| A90 | 3  | 12858083  | 12858083  | C          | G | 57  | 0.54 | <i>CAND2</i>    | NM_001162499 | Missense     | p.A551G    | -2.88 | Deleterious | 0.08 | Tolerated | 0.136 | benign            |
| A90 | 8  | 43147845  | 43147845  | C          | T | 21  | 0.57 | <i>POTEA</i>    | NM_001005365 | Missense     | p.A73V     | NA    | NA          | NA   | NA        | NA    | NA                |
| A90 | 10 | 55913034  | 55913034  | T          | A | 37  | 0.46 | <i>PCDH15</i>   | NM_001142763 | Missense     | p.D542V    | -7.25 | Deleterious | 0    | Damaging  | 1     | probably damaging |
| A90 | 1  | 236917271 | 236917271 | G          | A | 41  | 0.46 | <i>ACTN2</i>    | NM_001103    | Missense     | p.D622N    | -4.07 | Deleterious | 0    | Damaging  | 0.999 | probably damaging |
| A90 | 20 | 34526809  | 34526809  | G          | A | 104 | 0.49 | <i>PHF20</i>    | NM_016436    | Missense     | p.E831K    | -1.11 | Neutral     | 0.05 | Damaging  | 0.976 | probably damaging |
| A90 | 14 | 21821665  | 21821665  | C          | T | 22  | 0.55 | <i>SUPT16H</i>  | NM_007192    | Missense     | p.E994K    | -3.47 | Deleterious | 0    | Damaging  | 0.956 | possibly damaging |
| A90 | 12 | 25398285  | 25398285  | C          | G | 53  | 0.38 | <i>KRAS</i>     | NM_033360    | Missense     | p.G12R     | -6.18 | Deleterious | 0.02 | Damaging  | 0.802 | possibly damaging |
| A90 | 13 | 111155584 | 111155584 | G          | A | 95  | 0.54 | <i>COL4A2</i>   | NM_001846    | Missense     | p.G1332R   | -6.08 | Deleterious | 0    | Damaging  | 1     | probably damaging |
| A90 | 16 | 67289679  | 67289679  | G          | A | 22  | 0.45 | <i>SLC9A5</i>   | NM_004594    | Missense     | p.G253S    | -5.83 | Deleterious | 0    | Damaging  | 1     | probably damaging |
| A90 | 2  | 158978067 | 158978067 | A          | G | 110 | 0.47 | <i>UPP2</i>     | NM_001135098 | Missense     | p.K258E    | -1.18 | Neutral     | 0.89 | Tolerated | 0.001 | benign            |
| A90 | 12 | 34176906  | 34176906  | A          | C | 139 | 0.44 | <i>ALG10</i>    | NM_032834    | Missense     | p.M61L     | -2.27 | Neutral     | 0.56 | Tolerated | 0.196 | benign            |
| A90 | 5  | 140710637 | 140710637 | A          | G | 39  | 0.62 | <i>PCDHGA1</i>  | NM_018912    | Missense     | p.N129S    | -4.62 | Deleterious | 0.04 | Damaging  | 0.978 | probably damaging |
| A90 | X  | 123514933 | 123514933 | T          | C | 93  | 0.46 | <i>TENM1</i>    | NM_001163278 | Missense     | p.N2551S   | -1.66 | Neutral     | 0.31 | Tolerated | 0.027 | benign            |
| A90 | 11 | 65829363  | 65829363  | A          | G | 51  | 0.45 | <i>SF3B2</i>    | NM_006842    | Missense     | p.N624S    | -2.69 | Deleterious | 0.05 | Damaging  | 0.437 | benign            |
| A90 | 8  | 145106352 | 145106352 | G          | T | 14  | 0.29 | <i>OPLAH</i>    | NM_017570    | Missense     | p.P1248T   | NA    | NA          | 0    | Damaging  | 1     | probably damaging |
| A90 | 6  | 17292010  | 17292010  | C          | T | 31  | 0.48 | <i>RBM24</i>    | NM_001143942 | Missense     | p.P124L    | -5.02 | Deleterious | 0.06 | Tolerated | 0.983 | probably damaging |
| A90 | 7  | 49815474  | 49815474  | C          | A | 53  | 0.47 | <i>VWC2</i>     | NM_198570    | Missense     | p.P148Q    | -2.27 | Neutral     | 0.17 | Tolerated | 0.997 | probably damaging |
| A90 | 19 | 4538386   | 4538386   | G          | A | 60  | 0.53 | <i>LRG1</i>     | NM_052972    | Missense     | p.P204S    | -4.84 | Deleterious | 0.3  | Tolerated | 0.91  | possibly damaging |
|     |    |           |           | AGAGCCAGG  |   |     |      |                 |              |              |            |       |             |      |           |       |                   |
| A90 | 1  | 152975658 | 152975658 | CTGTACCAA  | A | 31  | 0.42 | <i>SPRR3</i>    | NM_005416    |              | p.EPGCTKVP | -9.33 | Deleterious | NA   | NA        | NA    | NA                |
|     |    |           |           | GGTCCCT    |   |     |      |                 |              | In_Frame_Del | 95del      |       |             |      |           |       |                   |
| A90 | 3  | 101039204 | 101039204 | G          | T | 34  | 0.44 | <i>IMPG2</i>    | NM_016247    | Missense     | p.P5T      | -1.09 | Neutral     | 0.18 | Tolerated | 0.483 | possibly damaging |
| A90 | 3  | 64587693  | 64587693  | C          | T | 56  | 0.50 | <i>ADAMTS9</i>  | NM_182920    | Missense     | p.R1315H   | -0.01 | Neutral     | 0.54 | Tolerated | 0.001 | benign            |

|     |    |           |           |   |        |     |      |                    |              |                 |           |       |             |      |           |       |                   |
|-----|----|-----------|-----------|---|--------|-----|------|--------------------|--------------|-----------------|-----------|-------|-------------|------|-----------|-------|-------------------|
| A90 | X  | 103349414 | 103349414 | C | T      | 36  | 0.44 | <i>SLC25A53</i>    | NM_001012755 | Missense        | p.R176H   | -4.73 | Deleterious | 0.05 | Damaging  | 0.062 | benign            |
| A90 | 22 | 50546667  | 50546667  | G | T      | 79  | 0.49 | <i>MOV10L1</i>     | NM_018995    | Missense        | p.R182L   | -4.38 | Deleterious | 0.01 | Damaging  | 0.994 | probably damaging |
| A90 | 20 | 31672780  | 31672780  | C | T      | 38  | 0.42 | <i>BPIFB4</i>      | NM_182519    | Missense        | p.R254C   | -3.02 | Deleterious | 0.21 | Tolerated | 0.019 | benign            |
| A90 | 12 | 124359880 | 124359880 | C | T      | 138 | 0.40 | <i>DNAH10</i>      | NM_207437    | nonsense        | p.R2563_  | NA    | NA          | 0.56 | Tolerated | NA    | NA                |
| A90 | 22 | 32480560  | 32480560  | C | T      | 39  | 0.28 | <i>SLC5A1</i>      | NM_000343    | nonsense        | p.R267_   | NA    | NA          | 1    | Tolerated | NA    | NA                |
| A90 | X  | 152967490 | 152967490 | C | T      | 11  | 0.55 | <i>BCAP31</i>      | NM_001139457 | Missense        | p.R292H   | -2.53 | Deleterious | 0.09 | Tolerated | 0.994 | probably damaging |
| A90 | 1  | 26440918  | 26440918  | G | T      | 81  | 0.42 | <i>PDIK1L</i>      | NM_001243532 | Missense        | p.R40L    | -3.4  | Deleterious | 0.04 | Damaging  | 0.501 | possibly damaging |
| A90 | 16 | 2120571   | 2120571   | C | T      | 58  | 0.84 | <i>TSC2</i>        | NM_000548    | Missense        | p.R611W   | -7.26 | Deleterious | 0    | Damaging  | 1     | probably damaging |
| A90 | 7  | 140246715 | 140246715 | G | A      | 40  | 0.40 | <i>DENND2A</i>     | NM_015689    | nonsense        | p.R688_   | NA    | NA          | 1    | Tolerated | NA    | NA                |
| A90 | 2  | 180809887 | 180809887 | C | T      | 98  | 0.43 | <i>CWC22</i>       | NM_020943    | Missense        | p.R899Q   | -1.17 | Neutral     | 0.06 | Tolerated | 0.995 | probably damaging |
| A90 | 9  | 4118594   | 4118594   | G | A      | 64  | 0.56 | <i>GLIS3</i>       | NM_001042413 | Missense        | p.S295L   | -1.98 | Neutral     | 0.31 | Tolerated | 1     | probably damaging |
| A90 | 12 | 124393912 | 124393912 | C | T      | 53  | 0.51 | <i>DNAH10</i>      | NM_207437    | Missense        | p.S3189F  | -5.3  | Deleterious | 0    | Damaging  | 0.997 | probably damaging |
| A90 | 1  | 156642553 | 156642553 | C | T      | 75  | 0.45 | <i>NES</i>         | NM_006617    | Missense        | p.S476N   | -1.83 | Neutral     | 0.02 | Damaging  | 0.969 | probably damaging |
| A90 | X  | 76888829  | 76888829  | T | TATGGC | 81  | 0.36 | <i>ATRX</i>        | NM_000489    | Frame_Shift_Ins | p.Y1667fs | NA    | NA          | NA   | NA        | NA    | NA                |
| A90 | 9  | 13109981  | 13109981  | G | A      | 38  | 0.50 | <i>MPDZ</i>        | NM_003829    | Missense        | p.T1942M  | -1.9  | Neutral     | 0.02 | Damaging  | 1     | probably damaging |
| A90 | 2  | 102957262 | 102957262 | C | T      | 84  | 0.42 | <i>ILIRL1</i>      | NM_016232    | Missense        | p.T195M   | -4.36 | Deleterious | 0.03 | Damaging  | 1     | probably damaging |
| A90 | 2  | 207176153 | 207176153 | G | A      | 91  | 0.36 | <i>ZDBF2</i>       | NM_020923    | Missense        | p.V2301I  | -0.54 | Neutral     | 0.2  | Tolerated | 0     | benign            |
| A90 | 3  | 3067887   | 3067887   | G | A      | 108 | 0.42 | <i>CNTN4</i>       | NM_175607    | Missense        | p.V530M   | -0.5  | Neutral     | 0.09 | Tolerated | 0.358 | benign            |
| A90 | 20 | 7915251   | 7915251   | C | T      | 61  | 0.33 | <i>HAO1</i>        | NM_017545    | Missense        | p.V57I    | -0.88 | Neutral     | 0.06 | Tolerated | 0.006 | benign            |
| A90 | 4  | 54231848  | 54231848  | C | CG     | 30  | 0.63 | <i>SCFD2</i>       | NM_152540    | Frame_Shift_Ins | p.V86fs   | NA    | NA          | NA   | NA        | NA    | NA                |
| A91 | 17 | 17062146  | 17062146  | G | A      | 19  | 0.26 | <i>MPRIP</i>       | NM_015134    | Missense        | p.D626N   | -3.01 | Deleterious | 0.01 | Damaging  | 0.871 | possibly damaging |
| A91 | 1  | 159505715 | 159505715 | A | G      | 87  | 0.14 | <i>OR10J5</i>      | NM_001004469 | Missense        | p.F28S    | -7.12 | Deleterious | 0.01 | Damaging  | 1     | probably damaging |
| A91 | 3  | 142279172 | 142279172 | C | T      | 85  | 0.15 | <i>ATR</i>         | NM_001184    | Missense        | p.G492R   | -1.87 | Neutral     | 0    | Damaging  | 1     | probably damaging |
| A91 | 7  | 81340797  | 81340797  | G | A      | 30  | 0.17 | <i>HGF</i>         | NM_000601    | Missense        | p.H482Y   | -1.28 | Neutral     | NA   | NA        | 0.98  | probably damaging |
| A91 | 16 | 51173879  | 51173879  | G | T      | 98  | 0.15 | <i>SALL1</i>       | NM_002968    | Missense        | p.H752N   | -6.71 | Deleterious | 0    | Damaging  | 0.991 | probably damaging |
| A91 | 6  | 54191662  | 54191662  | G | A      | 159 | 0.16 | <i>TINAG</i>       | NM_014464    | Missense        | p.R191H   | -4.56 | Deleterious | 0.04 | Damaging  | 0.84  | possibly damaging |
| A91 | 11 | 77911209  | 77911209  | C | T      | 83  | 0.10 | <i>USP35</i>       | NM_020798    | Missense        | p.R323W   | -7.38 | Deleterious | 0    | Damaging  | 1     | probably damaging |
| A91 | 6  | 31753094  | 31753094  | G | A      | 74  | 0.19 | <i>VARS</i>        | NM_006295    | Missense        | p.R426W   | -6.4  | Deleterious | 0    | Damaging  | 1     | probably damaging |
| A93 | X  | 137939775 | 137939775 | G | A      | 67  | 0.16 | <i>FGF13</i>       | NM_001139500 | Missense        | p.A39V    | -0.26 | Neutral     | 1    | Tolerated | 0.999 | probably damaging |
| A93 | 12 | 112888166 | 112888166 | A | G      | 98  | 0.10 | <i>PTPN11</i>      | NM_002834    | Missense        | p.D61G    | -5.64 | Deleterious | 0.03 | Damaging  | 0.908 | possibly damaging |
| A93 | 2  | 23980369  | 23980369  | C | A      | 205 | 0.27 | <i>ATAD2B</i>      | NM_017552    | nonsense        | p.E1333_  | NA    | NA          | 0.44 | Tolerated | NA    | NA                |
| A93 | 3  | 159606659 | 159606659 | A | C      | 89  | 0.25 | <i>IQCJ-SCHIP1</i> | NM_001197113 | Missense        | p.K491N   | -1.16 | Neutral     | 0.09 | Tolerated | 1     | probably damaging |

|     |    |           |           |   |    |     |      |                 |              |                 |          |        |             |      |           |       |                   |
|-----|----|-----------|-----------|---|----|-----|------|-----------------|--------------|-----------------|----------|--------|-------------|------|-----------|-------|-------------------|
| A93 | 16 | 88694525  | 88694525  | A | T  | 32  | 0.31 | <i>ZC3H18</i>   | NM_144604    | nonsense        | p.K823_  | NA     | NA          | 1    | Tolerated | NA    | NA                |
| A93 | 19 | 36884569  | 36884569  | G | GT | 122 | 0.25 | <i>ZFP82</i>    | NM_133466    | Frame_Shift_Ins | p.L225fs | NA     | NA          | NA   | NA        | NA    | NA                |
| A93 | 19 | 19656685  | 19656685  | C | T  | 65  | 0.29 | <i>CILP2</i>    | NM_153221    | nonsense        | p.R1111_ | NA     | NA          | 1    | Tolerated | NA    | NA                |
| A93 | 10 | 95380727  | 95380727  | G | T  | 82  | 0.29 | <i>PDE6C</i>    | NM_006204    | Missense        | p.R238L  | -5.83  | Deleterious | 0    | Damaging  | 1     | probably damaging |
| A93 | 19 | 614001    | 614001    | C | A  | 28  | 0.43 | <i>HCN2</i>     | NM_001194    | Missense        | p.R659S  | -5.57  | Deleterious | 0.03 | Damaging  | 1     | probably damaging |
| A93 | 7  | 138394490 | 138394490 | G | A  | 53  | 0.17 | <i>ATP6V0A4</i> | NM_130841    | nonsense        | p.R770_  | NA     | NA          | 0.59 | Tolerated | NA    | NA                |
| A93 | 4  | 628553    | 628553    | G | A  | 44  | 0.16 | <i>PDE6B</i>    | NM_000283    | Missense        | p.V186I  | -0.68  | Neutral     | 0.24 | Tolerated | 0.232 | benign            |
| A93 | 7  | 140453136 | 140453136 | A | T  | 36  | 0.11 | <i>BRAF</i>     | NM_004333    | Missense        | p.V600E  | -4.78  | Deleterious | 0    | Damaging  | 0.971 | probably damaging |
| A94 | 17 | 76490787  | 76490787  | T | C  | 85  | 0.26 | <i>DNAH17</i>   | NM_173628    | Missense        | p.D2053G | -6.33  | Deleterious | 0    | Damaging  | NA    | NA                |
| A94 | 7  | 120428872 | 120428872 | C | A  | 32  | 0.09 | <i>TSPAN12</i>  | NM_012338    | Missense        | p.G231V  | -2.59  | Deleterious | 0    | Damaging  | 0.974 | probably damaging |
| A94 | 17 | 47038277  | 47038277  | C | G  | 45  | 0.36 | <i>GIP</i>      | NM_004123    | Missense        | p.L141F  | -1.36  | Neutral     | 0.02 | Damaging  | 0.421 | benign            |
| A94 | 6  | 152751697 | 152751697 | G | A  | 169 | 0.28 | <i>SYNE1</i>    | NM_182961    | nonsense        | p.R1537_ | NA     | NA          | 0.58 | Tolerated | NA    | NA                |
| A94 | 18 | 56411581  | 56411581  | A | G  | 29  | 0.28 | <i>MALTI</i>    | NM_006785    | Missense        | p.S589G  | -3.11  | Deleterious | 0.02 | Damaging  | 0.582 | possibly damaging |
| A94 | 17 | 74902195  | 74902195  | G | T  | 20  | 0.15 | <i>MGAT5B</i>   | NM_198955    | Missense        | p.W328C  | -11.61 | Deleterious | 0    | Damaging  | 1     | probably damaging |
| A95 | 3  | 55508604  | 55508604  | C | T  | 19  | 0.42 | <i>WNT5A</i>    | NM_003392    | Missense        | p.A149T  | -1.93  | Neutral     | 0.05 | Damaging  | 0.983 | probably damaging |
| A95 | 8  | 10467589  | 10467589  | T | C  | 331 | 0.39 | <i>RPIL1</i>    | NM_178857    | Missense        | p.E1340G | -1.12  | Neutral     | 0.47 | Tolerated | 0.948 | possibly damaging |
| A95 | 2  | 125232388 | 125232388 | G | A  | 92  | 0.40 | <i>CNTNAP5</i>  | NM_130773    | Missense        | p.E331K  | -3.51  | Deleterious | 0.45 | Tolerated | 1     | probably damaging |
| A95 | 1  | 109839501 | 109839501 | C | T  | 43  | 0.53 | <i>MYBPHL</i>   | NM_001010985 | Missense        | p.G212S  | -5.85  | Deleterious | 0.03 | Damaging  | 1     | probably damaging |
| A95 | 1  | 22843939  | 22843939  | C | T  | 47  | 0.40 | <i>ZBTB40</i>   | NM_014870    | Missense        | p.H939Y  | -5.91  | Deleterious | 0    | Damaging  | 1     | probably damaging |
| A95 | 3  | 40529262  | 40529262  | A | G  | 32  | 0.47 | <i>ZNF619</i>   | NM_001145082 | Missense        | p.I461V  | -0.66  | Neutral     | 0.29 | Tolerated | 0.894 | possibly damaging |
| A95 | 2  | 11742584  | 11742584  | T | C  | 24  | 0.38 | <i>GREB1</i>    | NM_014668    | Missense        | p.I861T  | -0.55  | Neutral     | 0.42 | Tolerated | 0.763 | possibly damaging |
| A95 | 5  | 149502699 | 149502699 | T | C  | 45  | 0.87 | <i>PDGFRB</i>   | NM_002609    | Missense        | p.K697E  | -2.56  | Deleterious | 0.01 | Damaging  | 0.999 | probably damaging |
| A95 | 8  | 132052315 | 132052315 | G | T  | 18  | 0.61 | <i>ADCY8</i>    | NM_001115    | Missense        | p.L89M   | 0.03   | Neutral     | 0.3  | Tolerated | 0.617 | possibly damaging |
| A95 | 14 | 86088405  | 86088405  | C | A  | 108 | 0.27 | <i>FLRT2</i>    | NM_013231    | Missense        | p.Q183K  | -0.51  | Neutral     | 0.28 | Tolerated | 0.004 | benign            |
| A95 | 1  | 201182692 | 201182692 | C | T  | 76  | 0.45 | <i>IGFN1</i>    | NM_001164586 | Missense        | p.R2891W | -2.55  | Deleterious | 0.02 | Damaging  | 0.999 | probably damaging |
| A95 | 10 | 61894114  | 61894114  | G | A  | 158 | 0.31 | <i>ANK3</i>     | NM_020987    | Missense        | p.S919L  | -5.17  | Deleterious | 0    | Damaging  | 1     | probably damaging |
| A95 | 14 | 92537379  | 92537379  | T | C  | 27  | 0.33 | <i>ATXN3</i>    | NM_001164778 | Missense        | p.T136A  | 0      | Neutral     | NA   | NA        | NA    | NA                |
| A95 | 2  | 197172746 | 197172746 | G | A  | 21  | 0.43 | <i>HECW2</i>    | NM_020760    | Missense        | p.T833M  | -5.58  | Deleterious | 0    | Damaging  | 1     | probably damaging |
| A96 | 11 | 20699549  | 20699549  | C | T  | 15  | 0.33 | <i>NELL1</i>    | NM_006157    | Missense        | p.L43F   | -0.78  | Neutral     | 0.1  | Tolerated | 0.074 | benign            |
| A96 | 12 | 12037444  | 12037444  | C | T  | 33  | 0.58 | <i>ETV6</i>     | NM_001987    | nonsense        | p.R359_  | NA     | NA          | 0.8  | Tolerated | NA    | NA                |
| A96 | 14 | 42356700  | 42356700  | G | A  | 25  | 0.32 | <i>LRFN5</i>    | NM_152447    | Missense        | p.R291H  | -2.17  | Neutral     | 0.21 | Tolerated | 0.869 | possibly damaging |
| A96 | 2  | 27324371  | 27324371  | C | T  | 11  | 0.18 | <i>CGREF1</i>   | NM_001166239 | Missense        | p.G243E  | -0.08  | Neutral     | 0.34 | Tolerated | 0.36  | benign            |
| A96 | 2  | 125521571 | 125521571 | G | A  | 21  | 0.52 | <i>CNTNAP5</i>  | NM_130773    | Missense        | p.V793I  | -0.94  | Neutral     | 0.19 | Tolerated | 0.813 | possibly damaging |



|      |    |           |           |                    |                  |     |      |         |              |                 |          |       |             |      |           |       |                   |
|------|----|-----------|-----------|--------------------|------------------|-----|------|---------|--------------|-----------------|----------|-------|-------------|------|-----------|-------|-------------------|
| A96  | 20 | 60894740  | 60894740  | C                  | T                | 18  | 0.22 | LAMA5   | NM_005560    | Missense        | p.E2291K | -2.2  | Neutral     | NA   | NA        | 0.962 | probably damaging |
| A96  | 3  | 63542307  | 63542307  | G                  | C                | 30  | 0.53 | SYNPR   | NM_001130003 | Missense        | p.E100Q  | -1.85 | Neutral     | 0.53 | Tolerated | 0.999 | probably damaging |
| A96  | 3  | 96533790  | 96533790  | G                  | C                | 24  | 0.46 | EPHA6   | NM_001080448 | Missense        | p.G108A  | 0.13  | Neutral     | 0.54 | Tolerated | 0.999 | probably damaging |
| A96  | 4  | 79460451  | 79460451  | C                  | T                | 25  | 0.32 | FRAS1   | NM_025074    | Missense        | p.R3768C | -6.39 | Deleterious | 0    | Damaging  | 1     | probably damaging |
| A96  | 5  | 23526894  | 23526894  | A                  | T                | 11  | 0.27 | PRDM9   | NM_020227    | Missense        | p.H566L  | -1.58 | Neutral     | 0.31 | Tolerated | 0.005 | benign            |
| A96  | 5  | 179765522 | 179765522 | C                  | T                | 20  | 0.50 | GFPT2   | NM_005110    | Missense        | p.R29Q   | -3.69 | Deleterious | NA   | NA        | 1     | probably damaging |
| A96  | 6  | 30298612  | 30298612  | C                  | T                | 28  | 0.14 | TRIM39  | NM_021253    | Missense        | p.R170C  | -4.08 | Deleterious | 0.04 | Damaging  | 0.829 | possibly damaging |
| A96  | 6  | 32946102  | 32946102  | G                  | A                | 23  | 0.26 | BRD2    | NM_001199455 | Missense        | p.S593N  | -0.32 | Neutral     | 0.41 | Tolerated | 0.01  | benign            |
| A96  | 9  | 132876942 | 132876942 | G                  | T                | 19  | 0.16 | GPR107  | NM_001136557 | Missense        | p.A484S  | -2.22 | Neutral     | 0.27 | Tolerated | 0.043 | benign            |
| AC04 | 1  | 180283826 | 180283826 | C                  | G                | 95  | 0.35 | ACBD6   | NM_032360    | Splice Site     | p.A232sp | NA    | NA          | NA   | NA        | NA    | NA                |
| AC04 | 1  | 151265362 | 151265362 | T                  | TCGGCC           | 13  | 0.23 | PI4KB   | NM_002651    | Frame_Shift_Ins | p.D806fs | NA    | NA          | NA   | NA        | NA    | NA                |
| AC04 | 12 | 92538058  | 92538071  | CAGAGTGTGA<br>GTTC | CAGTTCC<br>CCCCG | 57  | 0.14 | BTG1    | NM_001731    | Frame_Shift_Del | p.E101fs | NA    | NA          | NA   | NA        | NA    | NA                |
| AC04 | 1  | 115258747 | 115258747 | C                  | A                | 60  | 0.45 | NRAS    | NM_002524    | Missense        | p.G12V   | -7.05 | Deleterious | 0.01 | Damaging  | 0.613 | possibly damaging |
| AC04 | 11 | 124829113 | 124829113 | C                  | A                | 61  | 0.46 | CCDC15  | NM_025004    | Missense        | p.Q94K   | -1.74 | Neutral     | 0.16 | Tolerated | 0.617 | possibly damaging |
| AC04 | 4  | 177094487 | 177094487 | G                  | A                | 49  | 0.39 | WDR17   | NM_170710    | Missense        | p.R1144H | -1.58 | Neutral     | 0.01 | Damaging  | 0.996 | probably damaging |
| AC04 | 12 | 52374840  | 52374840  | G                  | A                | 44  | 0.43 | ACVR1B  | NM_020328    | Missense        | p.R223Q  | -3.27 | Deleterious | 0.05 | Damaging  | 0.999 | probably damaging |
| AC04 | 21 | 10934955  | 10934955  | G                  | A                | 146 | 0.11 | TPTE    | NM_199261    | Nonsense        | p.R280_  | NA    | NA          | 0.81 | Tolerated | NA    | NA                |
| AC04 | 17 | 79078380  | 79078380  | G                  | A                | 12  | 0.42 | BALAP2  | NM_017451    | Missense        | p.R378Q  | -2.65 | Deleterious | 0.46 | Tolerated | 1     | probably damaging |
| AC06 | 12 | 25398211  | 25398211  | T                  | C                | 38  | 0.34 | KRAS    | NM_033360    | Missense        | p.I36M   | -2.35 | Neutral     | 0    | Damaging  | 0.999 | probably damaging |
| AC06 | 1  | 201352505 | 201352505 | C                  | A                | 37  | 0.49 | LAD1    | NM_005558    | Missense        | p.K396N  | -1.95 | Neutral     | 0.06 | Tolerated | 0.372 | benign            |
| AC06 | 19 | 56185384  | 56185384  | G                  | A                | 23  | 0.61 | U2AF2   | NM_007279    | Missense        | p.V460I  | -0.84 | Neutral     | 0.24 | Tolerated | 0.247 | benign            |
| AC09 | 4  | 90035046  | 90035046  | T                  | A                | 73  | 0.25 | TIGD2   | NM_145715    | Missense        | p.D307E  | -1.83 | Neutral     | 0.48 | Tolerated | 0.983 | probably damaging |
| AC09 | 21 | 46642083  | 46642083  | G                  | A                | 25  | 0.40 | ADARB1  | NM_015833    | Missense        | p.E733K  | -3.44 | Deleterious | 0    | Damaging  | 1     | probably damaging |
| AC09 | 9  | 36353292  | 36353292  | C                  | T                | 42  | 0.48 | RNF38   | NM_022781    | Missense        | p.G316R  | -2.87 | Deleterious | 0    | Damaging  | 1     | probably damaging |
| AC09 | 2  | 145147550 | 145147550 | T                  | C                | 19  | 0.16 | ZEB2    | NM_014795    | Missense        | p.H1038R | -7.28 | Deleterious | 0.08 | Tolerated | 0.992 | probably damaging |
| AC09 | 21 | 45194128  | 45194128  | G                  | C                | 117 | 0.24 | CSTB    | NM_000100    | Missense        | p.N84K   | -2.12 | Neutral     | 0.19 | Tolerated | 0.002 | benign            |
| AC09 | 5  | 149782167 | 149782167 | G                  | A                | 43  | 0.47 | CD74    | NM_001025159 | Missense        | p.P280L  | -1.23 | Neutral     | 1    | Tolerated | 0.001 | benign            |
| AC09 | 11 | 61112764  | 61112764  | C                  | T                | 13  | 0.77 | DAK     | NM_015533    | Missense        | p.P425S  | -1.74 | Neutral     | 0.42 | Tolerated | 0.759 | possibly damaging |
| AC09 | 11 | 57261560  | 57261560  | C                  | A                | 17  | 0.65 | SLC43A1 | NM_001198810 | Missense        | p.Q259H  | -2.58 | Deleterious | 0.13 | Tolerated | 0.005 | benign            |
| AC09 | 1  | 197552341 | 197552341 | G                  | A                | 60  | 0.33 | DENND1B | NM_001195215 | Missense        | p.R364C  | -6.59 | Deleterious | 0    | Damaging  | 1     | probably damaging |
| AC09 | 1  | 222713535 | 222713535 | G                  | A                | 37  | 0.46 | HHIPL2  | NM_024746    | Missense        | p.R423C  | -7.43 | Deleterious | 0    | Damaging  | 1     | probably damaging |
| AC09 | 12 | 13716673  | 13716673  | C                  | T                | 26  | 0.31 | GRIN2B  | NM_000834    | Missense        | p.V1167I | -0.27 | Neutral     | 0.18 | Tolerated | 0     | benign            |

|      |    |           |           |   |   |     |      |                |              |          |          |       |             |      |           |       |                   |
|------|----|-----------|-----------|---|---|-----|------|----------------|--------------|----------|----------|-------|-------------|------|-----------|-------|-------------------|
| AC10 | 12 | 25398284  | 25398284  | C | A | 43  | 0.33 | <i>KRAS</i>    | NM_033360    | Missense | p.G12V   | -7.11 | Deleterious | 0.01 | Damaging  | 0.999 | probably damaging |
| AC10 | 3  | 47129680  | 47129680  | G | A | 89  | 0.47 | <i>SETD2</i>   | NM_014159    | Nonsense | p.Q1734_ | NA    | NA          | 0.1  | Tolerated | NA    | NA                |
| AC10 | 22 | 42474013  | 42474013  | G | A | 19  | 0.37 | <i>FAM109B</i> | NM_001002034 | Missense | p.R239Q  | -2.8  | Deleterious | 0.03 | Damaging  | 0.704 | possibly damaging |
| AC10 | 19 | 41235200  | 41235200  | G | A | 25  | 0.48 | <i>ITPKC</i>   | NM_025194    | Missense | p.R450Q  | -2.7  | Deleterious | 0.17 | Tolerated | 0.247 | benign            |
| AC10 | 3  | 47155366  | 47155366  | G | T | 89  | 0.34 | <i>SETD2</i>   | NM_014159    | Nonsense | p.S1572_ | NA    | NA          | NA   | NA        | NA    | NA                |
| AC10 | 10 | 29821081  | 29821081  | G | A | 34  | 0.41 | <i>SVIL</i>    | NM_021738    | Missense | p.S620L  | -1.75 | Neutral     | NA   | NA        | 0.994 | probably damaging |
| AC10 | 4  | 177649009 | 177649009 | C | T | 60  | 0.47 | <i>VEGFC</i>   | NM_005429    | Missense | p.V159I  | -0.2  | Neutral     | 0.23 | Tolerated | 0.029 | benign            |
| AC10 | 1  | 92606722  | 92606722  | T | C | 65  | 0.34 | <i>BTBD8</i>   | NM_183242    | Missense | p.V295A  | -3.41 | Deleterious | 0.24 | Tolerated | 0.999 | probably damaging |
| AC10 | 19 | 7677298   | 7677298   | T | C | 7   | 0.71 | <i>CAMSAP3</i> | NM_001080429 | Missense | p.V667A  | -2.73 | Deleterious | 0    | Damaging  | 0.865 | possibly damaging |
| AC11 | 9  | 133753889 | 133753889 | A | G | 76  | 0.32 | <i>ABL1</i>    | NM_007313    | Missense | p.E472G  | -6.52 | Deleterious | 0    | Damaging  | 0.998 | probably damaging |
| AC11 | 21 | 36252866  | 36252866  | G | A | 74  | 0.45 | <i>RUNX1</i>   | NM_001754    | Nonsense | p.R166_  | NA    | NA          | 1    | Tolerated | NA    | NA                |
| AC11 | 11 | 59863044  | 59863044  | G | A | 71  | 0.35 | <i>MS4A2</i>   | NM_000139    | Missense | p.R217H  | -1.79 | Neutral     | 0.19 | Tolerated | 0.999 | probably damaging |
| AC11 | 2  | 107446647 | 107446647 | C | T | 96  | 0.45 | <i>ST6GAL2</i> | NM_001142351 | Missense | p.R398H  | -4.7  | Deleterious | 0.03 | Damaging  | 1     | probably damaging |
| AC11 | 1  | 202880291 | 202880291 | C | A | 116 | 0.45 | <i>KLHL12</i>  | NM_021633    | Missense | p.W203L  | -12.3 | Deleterious | 0    | Damaging  | 1     | probably damaging |
| AC11 | 8  | 24178792  | 24178792  | A | C | 119 | 0.38 | <i>ADAM28</i>  | NM_014265    | Missense | p.Y237S  | -4.56 | Deleterious | 0.16 | Tolerated | 0.998 | probably damaging |
| AC14 | 9  | 94172680  | 94172680  | C | T | 164 | 0.34 | <i>NFIL3</i>   | NM_005384    | Missense | p.A113T  | -2.73 | Deleterious | 0.06 | Tolerated | 0.955 | possibly damaging |
| AC14 | 6  | 168999557 | 168999557 | G | A | 80  | 0.18 | <i>SMOC2</i>   | NM_022138    | Missense | p.D244N  | -1.57 | Neutral     | 0.4  | Tolerated | 0.996 | probably damaging |
| AC14 | 1  | 115258748 | 115258748 | C | T | 94  | 0.05 | <i>NRAS</i>    | NM_002524    | Missense | p.G12S   | -4.44 | Deleterious | 0.04 | Damaging  | 0.329 | benign            |
| AC14 | 1  | 115258744 | 115258744 | C | T | 92  | 0.08 | <i>NRAS</i>    | NM_002524    | Missense | p.G13D   | -5.48 | Deleterious | 0.03 | Damaging  | 0.434 | benign            |
| AC14 | 6  | 31132556  | 31132556  | C | T | 19  | 0.47 | <i>POU5F1</i>  | NM_002701    | Missense | p.G302E  | -2.53 | Deleterious | 0.02 | Damaging  | 0.997 | probably damaging |
| AC14 | 2  | 84811276  | 84811276  | G | A | 150 | 0.15 | <i>DNAH6</i>   | NM_001370    | Missense | p.G795S  | -1.49 | Neutral     | 0.65 | Tolerated | 0.141 | benign            |
| AC14 | 8  | 10466600  | 10466600  | T | A | 99  | 0.28 | <i>RP1L1</i>   | NM_178857    | Missense | p.M1670L | -0.33 | Neutral     | 0.18 | Tolerated | 0     | benign            |
| AC14 | 12 | 52215029  | 52215029  | T | C | 38  | 0.24 | <i>FIGLN2</i>  | NM_001013690 | Missense | p.Q390R  | NA    | NA          | NA   | NA        | NA    | NA                |
| AC14 | 9  | 37006526  | 37006526  | C | T | 110 | 0.27 | <i>PAX5</i>    | NM_016734    | Missense | p.R140Q  | -3.45 | Deleterious | 0    | Damaging  | 1     | probably damaging |
| AC14 | 9  | 4576054   | 4576054   | G | A | 123 | 0.27 | <i>SLC1A1</i>  | NM_004170    | Missense | p.R310Q  | -3.05 | Deleterious | 0    | Damaging  | 0.998 | probably damaging |
| AC16 | 9  | 123370072 | 123370072 | T | C | 86  | 0.37 | <i>MEGF9</i>   | NM_001080497 | Missense | p.E435G  | -4.65 | Deleterious | 0.04 | Damaging  | 0.993 | probably damaging |
| AC16 | 11 | 68855396  | 68855396  | A | T | 10  | 0.60 | <i>TPCN2</i>   | NM_139075    | Missense | p.H745L  | -8.07 | Deleterious | 0    | Damaging  | 1     | probably damaging |
| AC16 | 17 | 7574003   | 7574003   | G | A | 34  | 0.62 | <i>TP53</i>    | NM_000546    | Nonsense | p.R342_  | NA    | NA          | 0.73 | Tolerated | NA    | NA                |
| AC16 | 8  | 131826440 | 131826440 | G | A | 37  | 0.49 | <i>ADCY8</i>   | NM_001115    | Nonsense | p.R930_  | NA    | NA          | 0.46 | Tolerated | NA    | NA                |
| AC16 | 1  | 38184352  | 38184352  | C | T | 27  | 0.48 | <i>EPHA10</i>  | NM_001099439 | Missense | p.V965M  | -2.18 | Neutral     | 0    | Damaging  | 0.999 | probably damaging |
| AC16 | 9  | 97869390  | 97869390  | C | G | 29  | 0.28 | <i>FANCC</i>   | NM_001243743 | Missense | p.W497C  | -5.01 | Deleterious | 0.01 | Damaging  | 0.997 | probably damaging |
| B01  | 7  | 100693850 | 100693850 | G | A | 71  | 0.54 | <i>MUC17</i>   | NM_001040105 | Missense | p.E4270K | 0.27  | Neutral     | 0.37 | Tolerated | 0.362 | benign            |
| B01  | 22 | 30662785  | 30662785  | C | G | 8   | 0.63 | <i>OSM</i>     | NM_020530    | Missense | p.G2R    | 1.82  | Neutral     | 0.87 | Tolerated | 0     | benign            |

|     |    |           |           |   |      |     |      |                 |              |                 |                |        |             |      |           |       |                   |
|-----|----|-----------|-----------|---|------|-----|------|-----------------|--------------|-----------------|----------------|--------|-------------|------|-----------|-------|-------------------|
| B01 | 19 | 6713420   | 6713420   | G | T    | 34  | 0.59 | <i>C3</i>       | NM_000064    | Missense        | p.P292T        | -1.57  | Neutral     | 0.59 | Tolerated | 0.003 | benign            |
| B01 | 6  | 46684253  | 46684253  | G | A    | 103 | 0.34 | <i>PLA2G7</i>   | NM_005084    | Missense        | p.R82C         | -7.83  | Deleterious | 0.02 | Damaging  | 1     | probably damaging |
| B01 | 11 | 114450895 | 114450895 | G | A    | 168 | 0.51 | <i>NXPE4</i>    | NM_001077639 | Missense        | p.T353M        | -4.8   | Deleterious | 0.01 | Damaging  | 0.999 | probably damaging |
| B01 | 1  | 39854025  | 39854025  | G | A    | 91  | 0.40 | <i>MACF1</i>    | NM_012090    | Missense        | p.V3109I       | -0.69  | Neutral     | 0.12 | Tolerated | 0.301 | benign            |
| B01 | 7  | 150647271 | 150647271 | C | T    | 25  | 0.52 | <i>KCNH2</i>    | NM_000238    | Missense        | p.V795I        | -0.96  | Neutral     | 0.03 | Damaging  | 1     | probably damaging |
| B02 | 5  | 19747107  | 19747107  | G | A    | 109 | 0.40 | <i>CDH18</i>    | NM_004934    | Missense        | p.A156V        | -1.47  | Neutral     | NA   | NA        | 0.802 | possibly damaging |
| B02 | X  | 85128074  | 85128074  | C | T    | 66  | 0.29 | <i>CHM</i>      | NM_000390    | Missense        | p.D585N        | -2.79  | Deleterious | 0.04 | Damaging  | 0.361 | benign            |
| B02 | 1  | 115256529 | 115256529 | T | A    | 83  | 0.30 | <i>NRAS</i>     | NM_002524    | Missense        | p.Q61L         | -6.32  | Deleterious | 0.01 | Damaging  | 0.973 | probably damaging |
| B02 | 8  | 100779116 | 100779116 | G | A    | 83  | 0.40 | <i>VPS13B</i>   | NM_017890    | Missense        | p.V2414M       | -0.61  | Neutral     | 0.08 | Tolerated | 0.621 | possibly damaging |
| B03 | X  | 29959905  | 29959905  | G | A    | 135 | 0.58 | <i>ILIRAPL1</i> | NM_014271    | Missense        | p.D399N        | -0.75  | Neutral     | NA   | NA        | 0.061 | benign            |
| B03 | 9  | 117808823 | 117808823 | A | C    | 171 | 0.38 | <i>TNC</i>      | NM_002160    | Missense        | p.L1664R       | 0.9    | Neutral     | 0.96 | Tolerated | 0.011 | benign            |
| B03 | 12 | 113730861 | 113730861 | C | G    | 52  | 0.42 | <i>TPCN1</i>    | NM_001143819 | Missense        | p.Q818E        | -0.51  | Neutral     | 1    | Tolerated | 0.546 | possibly damaging |
| B03 | 18 | 56033309  | 56033309  | G | A    | 17  | 0.41 | <i>NEDD4L</i>   | NM_001144967 | Missense        | p.V638M        | -1.97  | Neutral     | 0.03 | Damaging  | 0.992 | probably damaging |
| B04 | 3  | 39226481  | 39226481  | C | T    | 16  | 0.56 | <i>XIRP1</i>    | NM_194293    | Missense        | p.A1486T       | 0.53   | Neutral     | 0.57 | Tolerated | 0.007 | benign            |
| B04 | 15 | 41988816  | 41988816  | T | TC   | 13  | 0.62 | <i>MGA</i>      | NM_001080541 | Frame_Shift_Ins | p.D536fs       | NA     | NA          | NA   | NA        | NA    | NA                |
| B04 | 18 | 74617368  | 74617368  | A | AGCC | 76  | 0.32 | <i>ZNF236</i>   | NM_007345    | In_Frame_Ins    | p.763_763H->QP | -13.96 | Deleterious | NA   | NA        | NA    | NA                |
| B04 | 13 | 42461363  | 42461363  | T | A    | 117 | 0.43 | <i>VWA8</i>     | NM_015058    | Missense        | p.Q262H        | -4.28  | Deleterious | 0    | Damaging  | 1     | probably damaging |
| B04 | 19 | 34925779  | 34925779  | G | A    | 30  | 0.53 | <i>UBA2</i>     | NM_005499    | Missense        | p.R122Q        | -3.52  | Deleterious | 0    | Damaging  | 1     | probably damaging |
| B04 | 3  | 164906290 | 164906290 | G | A    | 88  | 0.27 | <i>SLITRK3</i>  | NM_014926    | Missense        | p.R777C        | -0.26  | Neutral     | 0.18 | Tolerated | 0.946 | possibly damaging |
| B04 | 1  | 24388564  | 24388564  | G | A    | 43  | 0.47 | <i>MYOM3</i>    | NM_152372    | Missense        | p.T1269M       | -1.15  | Neutral     | 0.12 | Tolerated | 0.825 | possibly damaging |
| B04 | 1  | 153066169 | 153066169 | G | A    | 115 | 0.16 | <i>SPRR2E</i>   | NM_001024209 | Missense        | p.T20M         | -4     | Deleterious | 0.07 | Tolerated | 0.001 | benign            |
| B04 | 11 | 113287657 | 113287657 | C | T    | 18  | 0.33 | <i>DRD2</i>     | NM_000795    | Missense        | p.V154I        | 0.14   | Neutral     | 0.32 | Tolerated | 0.986 | probably damaging |
| B04 | 12 | 78582046  | 78582046  | T | A    | 128 | 0.45 | <i>NAV3</i>     | NM_014903    | Missense        | p.Y1915N       | -5.15  | Deleterious | 0.07 | Tolerated | 0.959 | probably damaging |
| B06 | 11 | 6647863   | 6647863   | G | T    | 81  | 0.38 | <i>DCHS1</i>    | NM_003737    | Missense        | p.A2095E       | -0.4   | Neutral     | 1    | Tolerated | 0.012 | benign            |
| B06 | 5  | 35644628  | 35644628  | G | C    | 33  | 0.27 | <i>SPEF2</i>    | NM_024867    | Splice Site     | p.K195sp       | NA     | NA          | NA   | NA        | NA    | NA                |
| B06 | 3  | 47098907  | 47098907  | T | TC   | 51  | 0.31 | <i>SETD2</i>    | NM_014159    | Frame_Shift_Ins | p.K2123fs      | NA     | NA          | NA   | NA        | NA    | NA                |
| B06 | 5  | 72147135  | 72147135  | T | G    | 40  | 0.35 | <i>TNPO1</i>    | NM_002270    | Nonsense        | p.L65_         | NA     | NA          | 1    | Tolerated | NA    | NA                |
| B06 | 11 | 35515694  | 35515694  | G | A    | 38  | 0.47 | <i>PAMR1</i>    | NM_015430    | Missense        | p.P67L         | -2.02  | Neutral     | 0    | Damaging  | 1     | probably damaging |
| B12 | 5  | 79025919  | 79025919  | C | A    | 108 | 0.48 | <i>CMYA5</i>    | NM_153610    | Missense        | p.A444E        | -1.52  | Neutral     | 0    | Damaging  | 0.028 | benign            |
| B12 | 2  | 97749512  | 97749512  | T | C    | 35  | 0.40 | <i>FAHD2B</i>   | NM_199336    | Missense        | p.I309V        | -0.75  | Neutral     | 0.23 | Tolerated | 0.924 | possibly damaging |
| B12 | 16 | 15178499  | 15178499  | G | A    | 30  | 0.13 | <i>RRN3</i>     | NM_018427    | Missense        | p.S199L        | -0.5   | Neutral     | NA   | NA        | 0.496 | possibly damaging |
| B12 | 3  | 1369199   | 1369199   | C | A    | 52  | 0.12 | <i>CNTN6</i>    | NM_014461    | Missense        | p.S381Y        | -4.31  | Deleterious | 0    | Damaging  | 1     | probably damaging |

|     |    |           |           |      |   |    |      |                  |              |              |           |        |             |      |           |       |                   |
|-----|----|-----------|-----------|------|---|----|------|------------------|--------------|--------------|-----------|--------|-------------|------|-----------|-------|-------------------|
| B12 | 10 | 127525293 | 127525293 | G    | A | 35 | 0.14 | <i>DHX32</i>     | NM_018180    | Missense     | p.T732M   | -0.17  | Neutral     | 0    | Damaging  | 0.698 | possibly damaging |
| B12 | 9  | 37020768  | 37020768  | A    | C | 72 | 0.13 | <i>PAX5</i>      | NM_016734    | Missense     | p.V26G    | -4.49  | Deleterious | 0    | Damaging  | 1     | probably damaging |
| B13 | 17 | 73626700  | 73626700  | C    | T | 19 | 0.42 | <i>RECQL5</i>    | NM_004259    | Missense     | p.E573K   | -0.74  | Neutral     | 1    | Tolerated | 0.01  | benign            |
| B13 | 6  | 161528978 | 161528978 | G    | A | 20 | 0.20 | <i>MAP3K4</i>    | NM_005922    | Missense     | p.G1366R  | -6.56  | Deleterious | 0    | Damaging  | 1     | probably damaging |
| B13 | 9  | 37020673  | 37020673  | G    | A | 30 | 0.20 | <i>PAX5</i>      | NM_016734    | Missense     | p.L58F    | -3.31  | Deleterious | 0    | Damaging  | 1     | probably damaging |
| B13 | 3  | 196664445 | 196664445 | C    | T | 38 | 0.47 | <i>NCBP2</i>     | NM_007362    | Missense     | p.R112H   | -4.23  | Deleterious | 0.11 | Tolerated | 1     | probably damaging |
| B15 | 15 | 59961496  | 59961496  | G    | A | 64 | 0.36 | <i>BNIP2</i>     | NM_004330    | Missense     | p.A379V   | -3.84  | Deleterious | NA   | NA        | 0.354 | benign            |
| B15 | 2  | 113875606 | 113875606 | G    | A | 36 | 0.28 | <i>ILIRN</i>     | NM_173841    | Splice Site  | p.A4sp    | NA     | NA          | NA   | NA        | NA    | NA                |
| B15 | 1  | 154031094 | 154031094 | C    | T | 37 | 0.38 | <i>NUP210L</i>   | NM_207308    | Missense     | p.A976T   | -2.61  | Deleterious | 0.09 | Tolerated | 1     | probably damaging |
| B15 | 19 | 38900728  | 38900728  | G    | C | 14 | 0.29 | <i>RASGRP4</i>   | NM_170604    | Missense     | p.C658W   | -1.19  | Neutral     | 0.01 | Damaging  | 0.96  | probably damaging |
| B15 | 7  | 120969766 | 120969766 | T    | G | 12 | 0.42 | <i>WNT16</i>     | NM_057168    | Missense     | p.C81G    | -10.49 | Deleterious | 0    | Damaging  | 1     | probably damaging |
| B15 | 19 | 11687264  | 11687264  | C    | T | 16 | 0.44 | <i>ACP5</i>      | NM_001611    | Missense     | p.D177N   | -0.89  | Neutral     | 0.59 | Tolerated | 0     | benign            |
| B15 | 8  | 25246634  | 25246634  | G    | A | 37 | 0.43 | <i>DOCK5</i>     | NM_024940    | Missense     | p.E1387K  | -3.6   | Deleterious | 0    | Damaging  | 0.999 | probably damaging |
| B15 | 1  | 115258748 | 115258748 | C    | A | 24 | 0.33 | <i>NRAS</i>      | NM_002524    | Missense     | p.G12C    | -7.09  | Deleterious | 0.01 | Damaging  | 0.675 | possibly damaging |
| B15 | 11 | 59211105  | 59211105  | G    | A | 65 | 0.43 | <i>OR5A1</i>     | NM_001004728 | Missense     | p.G155D   | -6.96  | Deleterious | 0    | Damaging  | 1     | probably damaging |
| B15 | 7  | 33192340  | 33192340  | G    | A | 30 | 0.47 | <i>BBS9</i>      | NM_198428    | Missense     | p.G47E    | -7.38  | Deleterious | 0    | Damaging  | 1     | probably damaging |
| B15 | 17 | 4575583   | 4575586   | CTCT | C | 13 | 0.46 | <i>PELP1</i>     | NM_014389    | In_Frame_Del | p.E900del | -1.22  | Neutral     | NA   | NA        | NA    | NA                |
| B15 | 17 | 39274087  | 39274087  | G    | C | 20 | 0.25 | <i>KRTAP4-11</i> | NM_033059    | Missense     | p.L161V   | -1.22  | Neutral     | 0.64 | Tolerated | 0.267 | benign            |
| B15 | 11 | 22284521  | 22284521  | G    | T | 20 | 0.25 | <i>ANO5</i>      | NM_213599    | Missense     | p.L610F   | -3.88  | Deleterious | 0    | Damaging  | 1     | probably damaging |
| B15 | 2  | 105883974 | 105883974 | G    | A | 33 | 0.33 | <i>TGFBRAP1</i>  | NM_004257    | Missense     | p.L817F   | -1     | Neutral     | 0.7  | Tolerated | 0.683 | possibly damaging |
| B15 | 11 | 74644868  | 74644868  | A    | G | 6  | 0.67 | <i>XRR1</i>      | NM_182969    | Splice Site  | p.N109sp  | -2.25  | Neutral     | 0.02 | Damaging  | NA    | NA                |
| B15 | 5  | 60999838  | 60999838  | C    | T | 45 | 0.60 | <i>C5orf64</i>   | NM_173667    | Missense     | p.P124L   | -6.67  | Deleterious | 0    | Damaging  | 0.844 | possibly damaging |
| B15 | 17 | 4841715   | 4841715   | G    | C | 20 | 0.25 | <i>SLC25A11</i>  | NM_003562    | Missense     | p.P186A   | -7.48  | Deleterious | 0.13 | Tolerated | 0.966 | probably damaging |
| B15 | 4  | 71063662  | 71063662  | C    | G | 60 | 0.43 | <i>ODAM</i>      | NM_017855    | Missense     | p.P55A    | -6.48  | Deleterious | 0    | Damaging  | 1     | probably damaging |
| B15 | 12 | 130649174 | 130649174 | C    | T | 13 | 0.38 | <i>FZD10</i>     | NM_007197    | Missense     | p.P563S   | -0.89  | Neutral     | 0.08 | Tolerated | 0.02  | benign            |
| B15 | 13 | 24797756  | 24797756  | A    | G | 25 | 0.56 | <i>SPATA13</i>   | NM_001166271 | Missense     | p.Q230R   | -0.78  | Neutral     | 0.42 | Tolerated | NA    | NA                |
| B15 | 14 | 103412945 | 103412945 | C    | T | 20 | 0.60 | <i>CDC42BPB</i>  | NM_006035    | Missense     | p.R1203K  | -0.39  | Neutral     | 0.23 | Tolerated | 0.001 | benign            |
| B15 | 2  | 64779333  | 64779333  | G    | A | 48 | 0.42 | <i>AFTPH</i>     | NM_203437    | Missense     | p.R242K   | -0.16  | Neutral     | 0.91 | Tolerated | 0.01  | benign            |
| B15 | 7  | 151875096 | 151875096 | C    | A | 25 | 0.48 | <i>MLL3</i>      | NM_170606    | Splice Site  | p.R2481sp | NA     | NA          | NA   | NA        | NA    | NA                |
| B15 | 11 | 123813765 | 123813765 | G    | A | 48 | 0.38 | <i>OR6T1</i>     | NM_001005187 | Missense     | p.R261C   | -5.25  | Deleterious | 0    | Damaging  | 1     | probably damaging |
| B15 | 6  | 127836029 | 127836029 | C    | T | 30 | 0.40 | <i>SOGA3</i>     | NM_001012279 | Missense     | p.R422H   | -3.72  | Deleterious | 0    | Damaging  | 0.999 | probably damaging |
| B15 | 5  | 131534035 | 131534035 | C    | A | 13 | 0.62 | <i>P4HA2</i>     | NM_001017973 | Missense     | p.R448S   | -5.62  | Deleterious | 0    | Damaging  | 1     | probably damaging |
| B15 | 18 | 42281472  | 42281472  | G    | A | 45 | 0.51 | <i>SETBP1</i>    | NM_015559    | Missense     | p.R54H    | -1.41  | Neutral     | 0.08 | Tolerated | 0.391 | benign            |

|     |    |           |           |      |       |    |      |                 |              |                 |            |        |             |      |           |       |                   |
|-----|----|-----------|-----------|------|-------|----|------|-----------------|--------------|-----------------|------------|--------|-------------|------|-----------|-------|-------------------|
| B15 | 1  | 185951514 | 185951514 | C    | T     | 40 | 0.48 | <i>HMCN1</i>    | NM_031935    | Missense        | p.S928L    | -3.92  | Deleterious | 0.01 | Damaging  | 0.794 | possibly damaging |
| B15 | 16 | 87367634  | 87367634  | T    | A     | 6  | 0.50 | <i>FBXO31</i>   | NM_024735    | Missense        | p.T419S    | -0.34  | Neutral     | 0.81 | Tolerated | 0.001 | benign            |
| B15 | 7  | 31683521  | 31683521  | C    | T     | 40 | 0.40 | <i>CCDC129</i>  | NM_001257968 | Missense        | p.T872M    | -0.63  | Neutral     | 0.08 | Tolerated | 0.155 | benign            |
| B15 | 10 | 112362652 | 112362652 | G    | GTAGC | 55 | 0.53 | <i>SMC3</i>     | NM_005445    | Frame_Shift_Ins | p.V1123fs  | NA     | NA          | NA   | NA        | NA    | NA                |
| B15 | 9  | 37020768  | 37020768  | A    | C     | 21 | 0.19 | <i>PAX5</i>     | NM_016734    | Missense        | p.V26G     | -4.49  | Deleterious | 0    | Damaging  | 1     | probably damaging |
| B15 | 1  | 11217333  | 11217333  | A    | G     | 16 | 0.19 | <i>MTOR</i>     | NM_004958    | Missense        | p.W1449R   | -12.18 | Deleterious | 0    | Damaging  | 0.99  | probably damaging |
| B15 | 2  | 31571834  | 31571834  | C    | T     | 13 | 0.46 | <i>XDH</i>      | NM_000379    | Nonsense        | p.W994_    | NA     | NA          | 1    | Tolerated | NA    | NA                |
| B16 | 4  | 74318320  | 74318320  | C    | A     | 20 | 0.35 | <i>AFP</i>      | NM_001134    | Missense        | p.A544E    | 3.3    | Neutral     | 1    | Tolerated | 0.22  | benign            |
| B16 | 3  | 12623366  | 12623366  | G    | A     | 76 | 0.14 | <i>MKRN2</i>    | NM_014160    | Missense        | p.C343Y    | -10.08 | Deleterious | 0    | Damaging  | 1     | probably damaging |
| B16 | 9  | 36966713  | 36966713  | C    | A     | 14 | 0.21 | <i>PAX5</i>     | NM_016734    | Nonsense        | p.E205_    | NA     | NA          | 0.48 | Tolerated | NA    | NA                |
| B16 | 1  | 211842635 | 211842635 | G    | T     | 82 | 0.30 | <i>NEK2</i>     | NM_002497    | Missense        | p.P269T    | -4.1   | Deleterious | 0.02 | Damaging  | 0.209 | benign            |
| B16 | 7  | 123269304 | 123269304 | C    | A     | 40 | 0.30 | <i>ASB15</i>    | NM_080928    | Missense        | p.P419H    | -8.75  | Deleterious | 0    | Damaging  | 1     | probably damaging |
| B16 | 2  | 179611208 | 179611211 | GAGA | G     | 38 | 0.13 | <i>TTN</i>      | NM_133379    | In_Frame_Del    | p.S5306del | 1.38   | Neutral     | NA   | NA        | NA    | NA                |
| B16 | 9  | 136217106 | 136217106 | G    | A     | 29 | 0.21 | <i>RPL7A</i>    | NM_000972    | Missense        | p.V143I    | -0.61  | Neutral     | 0.22 | Tolerated | 0.128 | benign            |
| B16 | 16 | 15872658  | 15872658  | C    | T     | 26 | 0.27 | <i>MYH11</i>    | NM_001040114 | Missense        | p.V264M    | -1.81  | Neutral     | 0    | Damaging  | 0.997 | probably damaging |
| B17 | 1  | 180022162 | 180022162 | A    | C     | 72 | 0.43 | <i>CEP350</i>   | NM_014810    | Missense        | p.D1617A   | -4.45  | Deleterious | NA   | NA        | 1     | probably damaging |
| B17 | 6  | 160679545 | 160679545 | C    | T     | 25 | 0.24 | <i>SLC22A2</i>  | NM_003058    | Missense        | p.G82D     | -2.87  | Deleterious | 0.15 | Tolerated | 0.282 | benign            |
| B17 | 8  | 52321417  | 52321417  | C    | A     | 49 | 0.08 | <i>PXDNL</i>    | NM_144651    | Missense        | p.G923C    | -8.78  | Deleterious | 0    | Damaging  | 1     | probably damaging |
| B17 | 9  | 139108552 | 139108552 | G    | A     | 21 | 0.43 | <i>QSOX2</i>    | NM_181701    | Missense        | p.P368L    | -7.38  | Deleterious | 0.09 | Tolerated | 0.018 | benign            |
| B17 | 3  | 186980366 | 186980366 | C    | T     | 39 | 0.26 | <i>MASP1</i>    | NM_139125    | Missense        | p.R127H    | -2.73  | Deleterious | 0.03 | Damaging  | 0.974 | probably damaging |
| B17 | 9  | 119976799 | 119976799 | G    | A     | 54 | 0.43 | <i>ASTN2</i>    | NM_014010    | Missense        | p.R285W    | -4.66  | Deleterious | NA   | NA        | 1     | probably damaging |
| B17 | 14 | 105405283 | 105405283 | C    | T     | 67 | 0.36 | <i>AHNAK2</i>   | NM_138420    | Missense        | p.R5502Q   | -1.1   | Neutral     | 0.56 | Tolerated | 1     | probably damaging |
| B17 | 2  | 149866706 | 149866706 | C    | T     | 9  | 0.56 | <i>KIF5C</i>    | NM_004522    | Missense        | p.R870C    | -6.27  | Deleterious | NA   | NA        | 1     | probably damaging |
| B17 | 10 | 99330156  | 99330156  | C    | T     | 26 | 0.12 | <i>UBTD1</i>    | NM_024954    | Missense        | p.S187L    | -2.61  | Deleterious | 0.32 | Tolerated | 0.153 | benign            |
| B17 | 1  | 65311203  | 65311203  | C    | G     | 66 | 0.21 | <i>JAK1</i>     | NM_002227    | Missense        | p.S703T    | -1.5   | Neutral     | 0.4  | Tolerated | 0.999 | probably damaging |
| B17 | 19 | 1466086   | 1466086   | G    | A     | 10 | 0.40 | <i>APC2</i>     | NM_005883    | Missense        | p.S929N    | -2.05  | Neutral     | 0.01 | Damaging  | 1     | probably damaging |
| B17 | 3  | 155198866 | 155198866 | G    | A     | 52 | 0.29 | <i>PLCH1</i>    | NM_001130960 | Missense        | p.T1658M   | -2.07  | Neutral     | 0    | Damaging  | 0.09  | benign            |
| B17 | 19 | 36685207  | 36685207  | C    | T     | 17 | 0.35 | <i>ZNF565</i>   | NM_152477    | Missense        | p.V54I     | -0.69  | Neutral     | 0.03 | Damaging  | 0.003 | benign            |
| B18 | 12 | 126135456 | 126135456 | G    | A     | 15 | 0.60 | <i>TMEM132B</i> | NM_052907    | Missense        | p.G619D    | -4.4   | Deleterious | 0.02 | Damaging  | 1     | probably damaging |
| B18 | 2  | 177016609 | 177016609 | G    | A     | 8  | 0.75 | <i>HOXD4</i>    | NM_014621    | Missense        | p.G83D     | -0.15  | Neutral     | 0.15 | Tolerated | 0     | benign            |
| B18 | 5  | 110454715 | 110454715 | A    | C     | 36 | 0.42 | <i>WDR36</i>    | NM_139281    | Missense        | p.I657L    | -1.73  | Neutral     | 0    | Damaging  | 0.002 | benign            |
| B18 | 5  | 149406613 | 149406613 | T    | C     | 12 | 0.33 | <i>HMGXB3</i>   | NM_014983    | Missense        | p.L556P    | -2.79  | Deleterious | 0    | Damaging  | 1     | probably damaging |
| B18 | X  | 3228955   | 3228955   | G    | A     | 15 | 0.87 | <i>MXRA5</i>    | NM_015419    | Missense        | p.T2430M   | 0.46   | Neutral     | 0.37 | Tolerated | 0.381 | benign            |

|     |    |           |           |   |      |     |      |                |              |                 |          |        |             |      |           |       |                   |
|-----|----|-----------|-----------|---|------|-----|------|----------------|--------------|-----------------|----------|--------|-------------|------|-----------|-------|-------------------|
| C01 | 1  | 152816231 | 152816231 | G | T    | 33  | 0.24 | <i>LCE6A</i>   | NM_001128600 | Missense        | p.G79C   | -3     | Deleterious | 0    | Damaging  | 1     | probably damaging |
| C01 | 6  | 135314961 | 135314961 | T | C    | 82  | 0.13 | <i>HBS1L</i>   | NM_006620    | Missense        | p.I340V  | -0.25  | Neutral     | 1    | Tolerated | 0.003 | benign            |
| C01 | 2  | 189907942 | 189907942 | G | A    | 63  | 0.30 | <i>COL5A2</i>  | NM_000393    | Nonsense        | p.R1136_ | NA     | NA          | 0.63 | Tolerated | NA    | NA                |
| C01 | 1  | 82409214  | 82409214  | T | C    | 105 | 0.17 | <i>LPHN2</i>   | NM_012302    | Missense        | p.V320A  | -3.25  | Deleterious | 0    | Damaging  | 0.998 | probably damaging |
| C02 | 4  | 42895345  | 42895345  | C | T    | 86  | 0.26 | <i>GRXCR1</i>  | NM_001080476 | Missense        | p.A21V   | -1.5   | Neutral     | 0.05 | Damaging  | 1     | probably damaging |
| C02 | 5  | 35712967  | 35712967  | G | T    | 73  | 0.29 | <i>SPEF2</i>   | NM_024867    | Nonsense        | p.E965_  | NA     | NA          | 0.52 | Tolerated | NA    | NA                |
| C02 | 12 | 25398281  | 25398281  | C | T    | 29  | 0.17 | <i>KRAS</i>    | NM_033360    | Missense        | p.G13D   | -5.4   | Deleterious | 0    | Damaging  | 0.803 | possibly damaging |
| C02 | 4  | 144446640 | 144446640 | G | A    | 118 | 0.14 | <i>SMARCA5</i> | NM_003601    | Missense        | p.R186Q  | -2.04  | Neutral     | 0.8  | Tolerated | 0.504 | possibly damaging |
| C02 | 2  | 220396544 | 220396544 | G | A    | 8   | 0.38 | <i>ASIC4</i>   | NM_182847    | Missense        | p.R343Q  | -0.57  | Neutral     | 0.54 | Tolerated | 0.99  | probably damaging |
| C02 | 1  | 184677381 | 184677381 | C | T    | 34  | 0.29 | <i>EDEM3</i>   | NM_025191    | Missense        | p.R648Q  | -1.34  | Neutral     | 0.32 | Tolerated | 0.474 | possibly damaging |
| C02 | X  | 153906497 | 153906497 | G | T    | 108 | 0.25 | <i>GAB3</i>    | NM_001081573 | Missense        | p.S574R  | -2.95  | Deleterious | 0.08 | Tolerated | 0.361 | benign            |
| C02 | 4  | 165961591 | 165961591 | A | G    | 90  | 0.26 | <i>TRIM60</i>  | NM_001258025 | Missense        | p.T123A  | 0.18   | Neutral     | 1    | Tolerated | 0.003 | benign            |
| C02 | 12 | 112888202 | 112888202 | C | T    | 79  | 0.16 | <i>PTPN11</i>  | NM_002834    | Missense        | p.T73I   | -5.04  | Deleterious | 0    | Damaging  | 0.999 | probably damaging |
| C03 | 22 | 31332524  | 31332524  | G | GTTC | 58  | 0.14 | <i>MORC2</i>   | NM_014941    | Frame_Shift_Ins | p.Q509fs | NA     | NA          | NA   | NA        | NA    | NA                |
| C03 | 1  | 115256528 | 115256528 | T | G    | 63  | 0.10 | <i>NRAS</i>    | NM_002524    | Missense        | p.Q61H   | -4.43  | Deleterious | 0.01 | Damaging  | 0.294 | benign            |
| C05 | 7  | 157926523 | 157926523 | C | T    | 20  | 0.40 | <i>PTPRN2</i>  | NM_002847    | Missense        | p.A468T  | 0.2    | Neutral     | 0.37 | Tolerated | 0.083 | benign            |
| C05 | 16 | 58619318  | 58619318  | C | A    | 66  | 0.23 | <i>CNOT1</i>   | NM_016284    | Nonsense        | p.G244_  | NA     | NA          | NA   | NA        | NA    | NA                |
| C05 | 16 | 23546315  | 23546315  | C | A    | 6   | 0.67 | <i>EARS2</i>   | NM_001083614 | Missense        | p.K284N  | -4.99  | Deleterious | 0    | Damaging  | 1     | probably damaging |
| C05 | 6  | 52344552  | 52344552  | G | A    | 48  | 0.48 | <i>EFHC1</i>   | NM_018100    | Missense        | p.R536Q  | -0.29  | Neutral     | 0.37 | Tolerated | 0.017 | benign            |
| C05 | 5  | 140222026 | 140222026 | G | A    | 66  | 0.32 | <i>PCDHA8</i>  | NM_018911    | Missense        | p.V374M  | -2.91  | Deleterious | 0    | Damaging  | 1     | probably damaging |
| C05 | 11 | 66358410  | 66358410  | C | A    | 72  | 0.50 | <i>CCDC87</i>  | NM_018219    | Missense        | p.V693F  | -2.53  | Deleterious | 0.02 | Damaging  | 1     | probably damaging |
| C05 | 8  | 12957706  | 12957706  | C | T    | 52  | 0.17 | <i>DLC1</i>    | NM_182643    | Missense        | p.V714M  | -1.98  | Neutral     | 0.01 | Damaging  | 1     | probably damaging |
| C07 | 2  | 152732944 | 152732944 | C | T    | 181 | 0.44 | <i>CACNB4</i>  | NM_000726    | Missense        | p.G173R  | -0.41  | Neutral     | 0.14 | Tolerated | 1     | probably damaging |
| C07 | 5  | 61676982  | 61676982  | T | C    | 271 | 0.42 | <i>KIF2A</i>   | NM_001098511 | Missense        | p.L684S  | -3.16  | Deleterious | 0.38 | Tolerated | 1     | probably damaging |
| C07 | 3  | 120363231 | 120363231 | G | A    | 94  | 0.46 | <i>HGD</i>     | NM_000187    | Missense        | p.R237C  | -4.61  | Deleterious | 0.02 | Damaging  | 0.054 | benign            |
| C07 | 7  | 72734145  | 72734145  | C | T    | 54  | 0.39 | <i>TRIM50</i>  | NM_178125    | Splice Site     | p.V165sp | NA     | NA          | NA   | NA        | NA    | NA                |
| C08 | 16 | 3789597   | 3789597   | C | A    | 35  | 0.14 | <i>CREBBP</i>  | NM_004380    | Missense        | p.C1421F | -10.76 | Deleterious | 0.01 | Damaging  | 1     | probably damaging |
| C08 | 2  | 212543887 | 212543887 | G | T    | 25  | 0.20 | <i>ERBB4</i>   | NM_005235    | Missense        | p.N504K  | -2.19  | Neutral     | 0.08 | Tolerated | 0.673 | possibly damaging |
| C08 | X  | 142122028 | 142122028 | A | T    | 37  | 0.27 | <i>SPANXN4</i> | NM_001009613 | Missense        | p.N99I   | 0.42   | Neutral     | 0.01 | Damaging  | 0.563 | possibly damaging |
| C08 | 5  | 177715547 | 177715547 | G | A    | 19  | 0.16 | <i>COL23A1</i> | NM_173465    | Missense        | p.P138L  | NA     | NA          | NA   | NA        | NA    | NA                |
| C08 | 13 | 49039435  | 49039435  | C | A    | 51  | 0.24 | <i>RBI</i>     | NM_000321    | Nonsense        | p.S807_  | NA     | NA          | 1    | Tolerated | NA    | NA                |
| C08 | 15 | 44856807  | 44856807  | G | T    | 117 | 0.13 | <i>SPG11</i>   | NM_025137    | Nonsense        | p.Y2363_ | NA     | NA          | 1    | Tolerated | NA    | NA                |
| C12 | 9  | 117266893 | 117266893 | G | T    | 7   | 0.71 | <i>DFNB31</i>  | NM_015404    | Missense        | p.N63K   | -1.59  | Neutral     | 0.19 | Tolerated | 0.997 | probably damaging |

|     |    |           |           |         |         |     |      |                 |              |                 |                    |       |             |      |           |       |                   |
|-----|----|-----------|-----------|---------|---------|-----|------|-----------------|--------------|-----------------|--------------------|-------|-------------|------|-----------|-------|-------------------|
| C12 | 4  | 85662997  | 85662997  | G       | A       | 107 | 0.64 | <i>WDFY3</i>    | NM_014991    | Missense        | p.R2051C           | -7.21 | Deleterious | 0.04 | Damaging  | 1     | probably damaging |
| C12 | 11 | 61732971  | 61732971  | C       | T       | 96  | 0.39 | <i>FTH1</i>     | NM_002032    | Missense        | p.R44H             | -3.77 | Deleterious | 0.03 | Damaging  | 0.044 | benign            |
| C12 | 20 | 17462414  | 17462414  | G       | A       | 26  | 0.46 | <i>PCSK2</i>    | NM_002594    | Missense        | p.R539H            | -4.56 | Deleterious | 0    | Damaging  | 1     | probably damaging |
| C12 | 1  | 236148750 | 236148750 | G       | A       | 60  | 0.47 | <i>NID1</i>     | NM_002508    | Missense        | p.T995M            | -5.26 | Deleterious | 0    | Damaging  | 1     | probably damaging |
| C12 | 9  | 134312068 | 134312074 | GTCTCCA | G       | 60  | 0.48 | <i>PRRC2B</i>   | NM_013318    | In_Frame_Del    | p.119_121VS<br>N>D | -9.94 | Deleterious | NA   | NA        | NA    | NA                |
| C13 | 7  | 5781220   | 5781220   | G       | GAGATTA | 207 | 0.13 | <i>RNF216</i>   | NM_207116    | In_Frame_Ins    | p.85_86insLI       | -2.25 | Neutral     | NA   | NA        | NA    | NA                |
| C13 | X  | 46359511  | 46359511  | C       | CT      | 93  | 0.26 | <i>ZNF674</i>   | NM_001039891 | Frame_Shift_Ins | p.A505fs           | NA    | NA          | NA   | NA        | NA    | NA                |
| C13 | 11 | 55418452  | 55418452  | T       | G       | 62  | 0.27 | <i>OR4S2</i>    | NM_001004059 | Missense        | p.C25G             | -6.36 | Deleterious | 0.02 | Damaging  | 0.913 | possibly damaging |
| C13 | 19 | 50385601  | 50385601  | G       | A       | 90  | 0.21 | <i>TBC1D17</i>  | NM_024682    | Missense        | p.D248N            | -0.87 | Neutral     | 0.12 | Tolerated | 0.001 | benign            |
| C13 | 7  | 127014468 | 127014468 | C       | G       | 92  | 0.12 | <i>ZNF800</i>   | NM_176814    | Missense        | p.E308Q            | -0.87 | Neutral     | NA   | NA        | 0.992 | probably damaging |
| C13 | 5  | 26988247  | 26988247  | T       | A       | 26  | 0.27 | <i>CDH9</i>     | NM_016279    | Missense        | p.E65V             | -5.91 | Deleterious | NA   | NA        | 1     | probably damaging |
| C13 | 1  | 115258744 | 115258744 | C       | A       | 73  | 0.14 | <i>NRAS</i>     | NM_002524    | Missense        | p.G13V             | -7.65 | Deleterious | 0    | Damaging  | 0.998 | probably damaging |
| C13 | 19 | 45885952  | 45885952  | C       | G       | 41  | 0.17 | <i>PPP1R13L</i> | NM_006663    | Missense        | p.G761R            | -7.34 | Deleterious | 0    | Damaging  | 1     | probably damaging |
| C13 | 5  | 140896543 | 140896543 | G       | C       | 85  | 0.09 | <i>DIAPH1</i>   | NM_005219    | Missense        | p.L1232V           | -0.43 | Neutral     | 0.25 | Tolerated | 0.001 | benign            |
| C13 | 6  | 136475299 | 136475299 | C       | G       | 32  | 0.19 | <i>PDE7B</i>    | NM_018945    | Missense        | p.L189V            | -2.96 | Deleterious | 0    | Damaging  | 0.934 | possibly damaging |
| C13 | 2  | 272145    | 272145    | C       | T       | 87  | 0.18 | <i>ACP1</i>     | NM_004300    | Missense        | p.R76W             | -7    | Deleterious | 0.01 | Damaging  | 0.662 | possibly damaging |
| C13 | 7  | 80295767  | 80295767  | C       | T       | 32  | 0.16 | <i>CD36</i>     | NM_001001547 | Missense        | p.S237F            | -4.07 | Deleterious | NA   | NA        | 0.96  | probably damaging |
| C13 | 3  | 53783437  | 53783437  | G       | A       | 71  | 0.18 | <i>CACNAID</i>  | NM_000720    | Missense        | p.V1173I           | -0.71 | Neutral     | 0.18 | Tolerated | 0.975 | probably damaging |
| C13 | 1  | 216595534 | 216595534 | C       | A       | 53  | 0.53 | <i>USH2A</i>    | NM_206933    | Missense        | p.V49F             | -2.56 | Deleterious | 0    | Damaging  | 0.79  | possibly damaging |
| C15 | 6  | 10586757  | 10586757  | G       | A       | 100 | 0.10 | <i>GCNT2</i>    | NM_145655    | Missense        | p.A179T            | -1.89 | Neutral     | 0.54 | Tolerated | 0.004 | benign            |
| C15 | X  | 48456391  | 48456391  | G       | A       | 27  | 0.22 | <i>WDR13</i>    | NM_017883    | Missense        | p.A3T              | 0.48  | Neutral     | 1    | Tolerated | 0.279 | benign            |
| C15 | 4  | 119661940 | 119661940 | C       | T       | 81  | 0.14 | <i>SEC24D</i>   | NM_014822    | Missense        | p.G706S            | -5.6  | Deleterious | 0    | Damaging  | 1     | probably damaging |
| C15 | 7  | 140453134 | 140453134 | T       | C       | 28  | 0.18 | <i>BRAF</i>     | NM_004333    | Missense        | p.K601E            | -3.71 | Deleterious | 0    | Damaging  | 0.784 | possibly damaging |
| C15 | 5  | 176759181 | 176759181 | A       | C       | 55  | 0.44 | <i>LMAN2</i>    | NM_006816    | Missense        | p.L326R            | -3.93 | Deleterious | 0.03 | Damaging  | 0.935 | possibly damaging |
| C15 | 6  | 29141972  | 29141972  | G       | A       | 120 | 0.20 | <i>OR2J2</i>    | NM_030905    | Missense        | p.R187H            | -2.85 | Deleterious | 0.01 | Damaging  | 0.901 | possibly damaging |
| C15 | 5  | 160721153 | 160721153 | G       | A       | 98  | 0.12 | <i>GABRB2</i>   | NM_021911    | Missense        | p.R492C            | -6.88 | Deleterious | 0    | Damaging  | 1     | probably damaging |
| C15 | 1  | 227174287 | 227174287 | G       | A       | 127 | 0.43 | <i>ADCK3</i>    | NM_020247    | Missense        | p.R598H            | -4.88 | Deleterious | 0.02 | Damaging  | 1     | probably damaging |
| C15 | 7  | 5342472   | 5342472   | T       | C       | 13  | 0.31 | <i>SLC29A4</i>  | NM_153247    | Missense        | p.S499P            | -4.24 | Deleterious | 0.01 | Damaging  | 1     | probably damaging |
| C15 | 7  | 43484367  | 43484367  | C       | A       | 80  | 0.51 | <i>HECW1</i>    | NM_015052    | Missense        | p.S532R            | -1.35 | Neutral     | 0.15 | Tolerated | 0.09  | benign            |
| C17 | 19 | 45912353  | 45912353  | C       | T       | 113 | 0.51 | <i>CD3EAP</i>   | NM_012099    | Missense        | p.A376V            | -2.26 | Neutral     | 0.02 | Damaging  | 0.253 | benign            |
| C17 | 4  | 103720611 | 103720611 | G       | T       | 70  | 0.29 | <i>UBE2D3</i>   | NM_181893    | Missense        | p.D119E            | -3.56 | Deleterious | 0    | Damaging  | 0.914 | possibly damaging |
| C17 | 12 | 25398284  | 25398284  | C       | T       | 64  | 0.31 | <i>KRAS</i>     | NM_033360    | Missense        | p.G12D             | -5.37 | Deleterious | 0    | Damaging  | 0.517 | possibly damaging |

|     |    |           |           |    |   |     |      |                  |              |                 |           |       |             |      |           |       |                   |
|-----|----|-----------|-----------|----|---|-----|------|------------------|--------------|-----------------|-----------|-------|-------------|------|-----------|-------|-------------------|
| C17 | 12 | 79685850  | 79685851  | AG | A | 279 | 0.23 | <i>SYT1</i>      | NM_001135805 | Frame_Shift_Del | p.K138fs  | NA    | NA          | NA   | NA        | NA    | NA                |
| C17 | 17 | 39671746  | 39671746  | G  | C | 115 | 0.33 | <i>KRT15</i>     | NM_002275    | Missense        | p.L409V   | -2.78 | Deleterious | 0    | Damaging  | 1     | probably damaging |
| C17 | 6  | 114181209 | 114181210 | GA | G | 33  | 0.21 | <i>MARCKS</i>    | NM_002356    | Frame_Shift_Del | p.P151fs  | NA    | NA          | NA   | NA        | NA    | NA                |
| C17 | 1  | 171301908 | 171301908 | C  | T | 239 | 0.18 | <i>FMO4</i>      | NM_002022    | Missense        | p.P230S   | -7.79 | Deleterious | 0.02 | Damaging  | 1     | probably damaging |
| C17 | 2  | 179453984 | 179453984 | C  | T | 492 | 0.33 | <i>TTN</i>       | NM_001267550 | Missense        | p.R20823H | -0.58 | Neutral     | 0    | Damaging  | 0.014 | benign            |
| C17 | 14 | 29237444  | 29237444  | G  | A | 149 | 0.32 | <i>FOXG1</i>     | NM_005249    | Missense        | p.R320H   | -0.2  | Neutral     | 0.38 | Tolerated | 0.999 | probably damaging |
| C17 | 6  | 94066648  | 94066648  | G  | A | 133 | 0.24 | <i>EPHA7</i>     | NM_004440    | Missense        | p.R371W   | -4.17 | Deleterious | 0    | Damaging  | 1     | probably damaging |
| C17 | 21 | 28338577  | 28338577  | C  | G | 48  | 0.38 | <i>ADAMTS5</i>   | NM_007038    | Missense        | p.R45P    | 0.68  | Neutral     | 0.29 | Tolerated | 0.2   | benign            |
| C17 | 2  | 69709858  | 69709858  | A  | T | 169 | 0.31 | <i>AAK1</i>      | NM_014911    | Missense        | p.S818T   | -0.72 | Neutral     | 0.03 | Damaging  | 0.001 | benign            |
| C17 | 2  | 198636664 | 198636664 | G  | A | 121 | 0.18 | <i>BOLL</i>      | NM_197970    | Missense        | p.T144I   | -2.62 | Deleterious | 0    | Damaging  | 1     | probably damaging |
| C17 | 21 | 46021504  | 46021504  | T  | A | 80  | 0.29 | <i>KRTAP10-7</i> | NM_198689    | Missense        | p.V323E   | -4.23 | Deleterious | 0.27 | Tolerated | 0.911 | possibly damaging |
| C18 | 22 | 39815589  | 39815589  | G  | A | 45  | 0.51 | <i>TAB1</i>      | NM_006116    | Missense        | p.G244R   | -7.07 | Deleterious | 0    | Damaging  | 1     | probably damaging |
| C18 | 19 | 22157500  | 22157500  | G  | T | 182 | 0.46 | <i>ZNF208</i>    | NM_007153    | Missense        | p.H112Q   | -0.72 | Neutral     | 0.22 | Tolerated | 0.015 | benign            |
| C18 | 7  | 100481725 | 100481725 | A  | G | 83  | 0.39 | <i>SRRT</i>      | NM_015908    | Missense        | p.K208E   | -2.42 | Neutral     | 0.28 | Tolerated | 0.58  | possibly damaging |
| C18 | 8  | 143816819 | 143816819 | A  | T | 56  | 0.34 | <i>THEM6</i>     | NM_016647    | Missense        | p.M197L   | -0.6  | Neutral     | 0.19 | Tolerated | 0.002 | benign            |
| C18 | 1  | 197237545 | 197237545 | G  | A | 157 | 0.45 | <i>CRB1</i>      | NM_201253    | Missense        | p.M1I     | -0.81 | Neutral     | 0    | Damaging  | 0.745 | possibly damaging |
| C18 | 3  | 169846579 | 169846579 | G  | C | 123 | 0.41 | <i>PHC3</i>      | NM_024947    | Missense        | p.P561A   | -3.46 | Deleterious | 0.31 | Tolerated | 0.999 | probably damaging |
| C18 | 6  | 169625297 | 169625297 | G  | T | 67  | 0.52 | <i>THBS2</i>     | NM_003247    | Missense        | p.P906T   | -5.11 | Deleterious | 0.06 | Tolerated | 1     | probably damaging |
| C18 | 1  | 27876993  | 27876993  | C  | T | 69  | 0.36 | <i>AHDC1</i>     | NM_001029882 | Missense        | p.R545H   | -2.33 | Neutral     | 0    | Damaging  | 1     | probably damaging |
| C18 | X  | 5811397   | 5811397   | G  | A | 211 | 0.38 | <i>NLGN4X</i>    | NM_020742    | Missense        | p.R638C   | -2.88 | Deleterious | 0.02 | Damaging  | 0.998 | probably damaging |
| C18 | 11 | 2189411   | 2189411   | T  | A | 74  | 0.45 | <i>TH</i>        | NM_199292    | Splice Site     | p.V194sp  | NA    | NA          | NA   | NA        | NA    | NA                |
| C19 | 2  | 171071239 | 171071239 | G  | A | 148 | 0.26 | <i>MYO3B</i>     | NM_138995    | Missense        | p.G143S   | -3.52 | Deleterious | NA   | NA        | 1     | probably damaging |
| C19 | 12 | 113874593 | 113874593 | C  | T | 26  | 0.35 | <i>SDSL</i>      | NM_138432    | Missense        | p.R237W   | -4.63 | Deleterious | 0.02 | Damaging  | 0.892 | possibly damaging |
| C19 | 2  | 183050753 | 183050753 | G  | A | 77  | 0.53 | <i>PDE1A</i>     | NM_001258312 | Missense        | p.T481I   | 1.02  | Neutral     | 0.32 | Tolerated | 0     | benign            |
| C20 | 16 | 85667582  | 85667582  | G  | A | 65  | 0.43 | <i>GSE1</i>      | NM_014615    | Missense        | p.A24T    | -1.75 | Neutral     | 0.01 | Damaging  | 1     | probably damaging |
| C20 | 5  | 56229220  | 56229220  | C  | A | 158 | 0.49 | <i>MIER3</i>     | NM_152622    | Nonsense        | p.E201_   | NA    | NA          | 0.01 | Damaging  | NA    | NA                |
| C20 | 7  | 116339898 | 116339898 | G  | C | 314 | 0.43 | <i>MET</i>       | NM_001127500 | Missense        | p.E254Q   | -0.33 | Neutral     | 0.26 | Tolerated | 0.961 | probably damaging |
| C20 | 16 | 2125841   | 2125841   | G  | A | 78  | 0.36 | <i>TSC2</i>      | NM_000548    | Missense        | p.E863K   | -2.35 | Neutral     | 0.2  | Tolerated | 0.995 | probably damaging |
| C20 | 6  | 129959708 | 129959708 | C  | G | 114 | 0.08 | <i>ARHGAP18</i>  | NM_033515    | Missense        | p.G128A   | 0.04  | Neutral     | NA   | NA        | 0.004 | benign            |
| C20 | 9  | 123313133 | 123313133 | G  | C | 91  | 0.55 | <i>CDK5RAP2</i>  | NM_018249    | Missense        | p.I81M    | -2.04 | Neutral     | 0.04 | Damaging  | 1     | probably damaging |
| C20 | 15 | 72338088  | 72338088  | G  | C | 145 | 0.41 | <i>MYO9A</i>     | NM_006901    | Missense        | p.L273V   | -2.59 | Deleterious | 0    | Damaging  | 1     | probably damaging |
| C20 | 2  | 171239598 | 171239598 | C  | T | 35  | 0.20 | <i>MYO3B</i>     | NM_138995    | Nonsense        | p.Q362_   | NA    | NA          | 0.14 | Tolerated | NA    | NA                |
| C20 | 8  | 75927085  | 75927085  | G  | A | 120 | 0.34 | <i>CRISPLD1</i>  | NM_031461    | Missense        | p.R222Q   | -1.65 | Neutral     | 0.41 | Tolerated | 0.007 | benign            |



|     |    |           |           |    |       |     |      |                 |              |                 |                 |       |             |      |           |       |                   |
|-----|----|-----------|-----------|----|-------|-----|------|-----------------|--------------|-----------------|-----------------|-------|-------------|------|-----------|-------|-------------------|
| C20 | 12 | 81751968  | 81751968  | G  | A     | 44  | 0.34 | <i>PPF1A2</i>   | NM_003625    | Missense        | p.R556W         | -6.2  | Deleterious | 0.01 | Damaging  | 1     | probably damaging |
| C20 | 2  | 173362731 | 173362731 | C  | CGG   | 138 | 0.14 | <i>ITGA6</i>    | NM_001079818 | Frame_Shift_Ins | p.T1006fs       | NA    | NA          | NA   | NA        | NA    | NA                |
| C21 | 3  | 193007675 | 193007675 | T  | TCCC  | 53  | 0.36 | <i>ATP13A5</i>  | NM_198505    | In_Frame_Ins    | p.1007_1008insG | -4.51 | Deleterious | NA   | NA        | NA    | NA                |
| C21 | 2  | 168107600 | 168107600 | A  | G     | 213 | 0.39 | <i>XIRP2</i>    | NM_152381    | Missense        | p.D3233G        | -2.28 | Neutral     | 0.03 | Damaging  | 0.971 | probably damaging |
| C21 | 7  | 117864897 | 117864897 | T  | C     | 35  | 0.51 | <i>ANKRD7</i>   | NM_019644    | Missense        | p.F5L           | -3.35 | Deleterious | 0.09 | Tolerated | 0.064 | benign            |
| C21 | 1  | 115258748 | 115258748 | C  | T     | 82  | 0.52 | <i>NRAS</i>     | NM_002524    | Missense        | p.G12S          | -4.44 | Deleterious | 0.04 | Damaging  | 0.329 | benign            |
| C21 | 14 | 95080781  | 95080781  | G  | A     | 79  | 0.43 | <i>SERPINA3</i> | NM_001085    | Missense        | p.M1I           | -0.26 | Neutral     | 0    | Damaging  | 0.029 | benign            |
| C21 | 4  | 184240941 | 184240941 | G  | A     | 69  | 0.52 | <i>CLDN22</i>   | NM_001111319 | Missense        | p.T144M         | -2.51 | Deleterious | 0    | Damaging  | 0.99  | probably damaging |
| C22 | 19 | 21910750  | 21910750  | C  | T     | 63  | 0.35 | <i>ZNF100</i>   | NM_173531    | Missense        | p.D122N         | 0.18  | Neutral     | 0.6  | Tolerated | 0.001 | benign            |
| C22 | 1  | 115258747 | 115258747 | C  | T     | 61  | 0.13 | <i>NRAS</i>     | NM_002524    | Missense        | p.G12D          | -5.35 | Deleterious | 0    | Damaging  | 0.372 | benign            |
| C22 | 8  | 110450677 | 110450677 | C  | A     | 19  | 0.47 | <i>PKHD1L1</i>  | NM_177531    | Missense        | p.T1251K        | -0.99 | Neutral     | 0.5  | Tolerated | 0.757 | possibly damaging |
| C23 | 5  | 180486332 | 180486332 | G  | A     | 23  | 0.35 | <i>BTNL9</i>    | NM_152547    | Missense        | p.A360T         | -0.74 | Neutral     | 0.21 | Tolerated | 0.249 | benign            |
| C23 | 19 | 7927007   | 7927007   | G  | A     | 64  | 0.55 | <i>EVISL</i>    | NM_145245    | Splice Site     | p.A538sp        | NA    | NA          | NA   | NA        | NA    | NA                |
| C23 | 8  | 110986176 | 110986176 | C  | T     | 41  | 0.78 | <i>KCNV1</i>    | NM_014379    | Missense        | p.D148N         | -2.38 | Neutral     | 0.09 | Tolerated | 0.982 | probably damaging |
| C23 | 3  | 167761190 | 167761191 | TC | T     | 181 | 0.53 | <i>GOLIM4</i>   | NM_014498    | Frame_Shift_Del | p.E165fs        | NA    | NA          | NA   | NA        | NA    | NA                |
| C23 | 7  | 98586392  | 98586392  | G  | A     | 83  | 0.31 | <i>TRRAP</i>    | NM_001244580 | Missense        | p.E3136K        | -2.77 | Deleterious | 0.01 | Damaging  | 1     | probably damaging |
| C23 | 10 | 49658431  | 49658431  | C  | T     | 32  | 0.38 | <i>ARHGAP22</i> | NM_001256024 | Missense        | p.E597K         | -1.89 | Neutral     | 0.84 | Tolerated | 0.999 | probably damaging |
| C23 | 4  | 82355875  | 82355875  | A  | T     | 137 | 0.28 | <i>RASGEF1B</i> | NM_152545    | Missense        | p.F373Y         | -2.54 | Deleterious | 0.14 | Tolerated | 0.95  | possibly damaging |
| C23 | 9  | 13150542  | 13150542  | C  | T     | 114 | 0.50 | <i>MPDZ</i>     | NM_003829    | Missense        | p.G1200R        | -4.13 | Deleterious | 0.05 | Damaging  | 1     | probably damaging |
| C23 | 2  | 189927933 | 189927933 | C  | T     | 80  | 0.20 | <i>COL5A2</i>   | NM_000393    | Missense        | p.G612R         | -7.32 | Deleterious | NA   | NA        | 1     | probably damaging |
| C23 | 12 | 12022844  | 12022844  | A  | AACTC | 68  | 0.37 | <i>ETV6</i>     | NM_001987    | Frame_Shift_Ins | p.H317fs        | NA    | NA          | NA   | NA        | NA    | NA                |
| C23 | 6  | 101077007 | 101077007 | T  | A     | 54  | 0.39 | <i>ASCC3</i>    | NM_006828    | Missense        | p.K1420M        | -2.04 | Neutral     | 0.02 | Damaging  | 0.281 | benign            |
| C23 | 10 | 135020804 | 135020804 | G  | A     | 135 | 0.27 | <i>KNDC1</i>    | NM_152643    | Missense        | p.R1248H        | -3.08 | Deleterious | 0.13 | Tolerated | 0.999 | probably damaging |
| C23 | 2  | 237489593 | 237489593 | G  | A     | 203 | 0.52 | <i>CXCR7</i>    | NM_020311    | Missense        | p.R162H         | -3.52 | Deleterious | 0.04 | Damaging  | 0.995 | probably damaging |
| C23 | 16 | 23718096  | 23718096  | G  | A     | 55  | 0.56 | <i>ERN2</i>     | NM_033266    | Missense        | p.R204C         | 0.95  | Neutral     | 0.05 | Damaging  | 0.975 | probably damaging |
| C23 | 18 | 6977821   | 6977821   | G  | A     | 140 | 0.29 | <i>LAMA1</i>    | NM_005559    | Missense        | p.R2084W        | -5.63 | Deleterious | 0    | Damaging  | 1     | probably damaging |
| C23 | X  | 96140069  | 96140069  | C  | T     | 92  | 0.43 | <i>RPA4</i>     | NM_013347    | Missense        | p.R254W         | -2.09 | Neutral     | 0    | Damaging  | 0.001 | benign            |
| C23 | 9  | 140123227 | 140123227 | C  | T     | 21  | 0.29 | <i>RNF224</i>   | NM_001190228 | Missense        | p.R54W          | -5.99 | Deleterious | 0    | Damaging  | NA    | NA                |
| C23 | 6  | 16306669  | 16306669  | C  | T     | 188 | 0.35 | <i>ATXN1</i>    | NM_001128164 | Missense        | p.R780H         | -1.39 | Neutral     | 0.02 | Damaging  | 1     | probably damaging |
| C23 | 6  | 71236340  | 71236340  | T  | A     | 327 | 0.39 | <i>FAM135A</i>  | NM_001162529 | Missense        | p.S1185T        | -1.42 | Neutral     | 0.65 | Tolerated | 0.868 | possibly damaging |
| C23 | 7  | 82997263  | 82997264  | GT | CG    | 96  | 0.34 | <i>SEMA3E</i>   | NM_012431    | Missense        | p.T656R         | -2.04 | Neutral     | NA   | NA        | NA    | NA                |
| C23 | 16 | 88691140  | 88691140  | A  | AC    | 37  | 0.46 | <i>ZC3H18</i>   | NM_144604    | Frame_Shift_Ins | p.T677fs        | NA    | NA          | NA   | NA        | NA    | NA                |

|     |    |           |           |      |     |     |      |                             |              |                 |          |       |             |      |           |       |                   |
|-----|----|-----------|-----------|------|-----|-----|------|-----------------------------|--------------|-----------------|----------|-------|-------------|------|-----------|-------|-------------------|
| C23 | 7  | 5427882   | 5427882   | C    | T   | 131 | 0.44 | <i>TNRC18</i>               | NM_001080495 | Missense        | p.V525M  | -1.35 | Neutral     | 0.06 | Tolerated | 0.999 | probably damaging |
| C23 | 17 | 74382478  | 74382478  | T    | TGA | 88  | 0.38 | <i>SPHK1</i>                | NM_001142602 | Frame_Shift_Ins | p.V88fs  | NA    | NA          | NA   | NA        | NA    | NA                |
| C23 | 5  | 38482753  | 38482753  | A    | G   | 45  | 0.49 | <i>LIFR</i>                 | NM_001127671 | Missense        | p.Y870H  | -3.64 | Deleterious | 0.04 | Damaging  | 1     | probably damaging |
| C24 | 13 | 99907742  | 99907742  | C    | T   | 126 | 0.34 | <i>GPR18</i>                | NM_001098200 | Missense        | p.A129T  | -0.44 | Neutral     | NA   | NA        | 0.004 | benign            |
| C24 | 19 | 39334496  | 39334496  | T    | C   | 63  | 0.43 | <i>HNRNPL</i>               | NM_001533    | Missense        | p.N289S  | -0.78 | Neutral     | 0.66 | Tolerated | 0.002 | benign            |
| C24 | 12 | 100466453 | 100466453 | G    | C   | 59  | 0.20 | <i>UHRF1BP1</i><br><i>L</i> | NM_015054    | Missense        | p.P516A  | -7.17 | Deleterious | 0    | Damaging  | 1     | probably damaging |
| C24 | 6  | 27101163  | 27101163  | C    | T   | 55  | 0.25 | <i>HIST1H2AG</i>            | NM_021064    | Nonsense        | p.Q105*  | NA    | NA          | 0    | Damaging  | NA    | NA                |
| C25 | 21 | 46596127  | 46596127  | G    | A   | 225 | 0.18 | <i>ADARB1</i>               | NM_015833    | Missense        | p.D171N  | -2.94 | Deleterious | 0    | Damaging  | 0.997 | probably damaging |
| C25 | 6  | 17131032  | 17131032  | G    | C   | 216 | 0.24 | <i>STMND1</i>               | NM_001190766 | Missense        | p.D251H  | -3.68 | Deleterious | NA   | NA        | NA    | NA                |
| C25 | 7  | 107258901 | 107258901 | G    | T   | 73  | 0.26 | <i>BCAP29</i>               | NM_001008405 | Missense        | p.D300Y  | -0.59 | Neutral     | 0    | Damaging  | 0.815 | possibly damaging |
| C25 | 5  | 93807373  | 93807373  | C    | T   | 106 | 0.12 | <i>KLAA0825</i>             | NM_001145678 | Missense        | p.D507N  | -0.77 | Neutral     | 0.22 | Tolerated | 0.493 | possibly damaging |
| C25 | 19 | 22000744  | 22000744  | C    | G   | 223 | 0.25 | <i>ZNF43</i>                | NM_001256653 | Missense        | p.E68Q   | -0.4  | Neutral     | 0.05 | Damaging  | 0.072 | benign            |
| C25 | 12 | 112888210 | 112888210 | G    | A   | 107 | 0.16 | <i>PTPN11</i>               | NM_002834    | Missense        | p.E76K   | -3.45 | Deleterious | 0    | Damaging  | 0.998 | probably damaging |
| C25 | 1  | 111891232 | 111891232 | G    | A   | 399 | 0.41 | <i>PIFO</i>                 | NM_181643    | Missense        | p.R118Q  | -3.71 | Deleterious | 0.01 | Damaging  | 0.993 | probably damaging |
| C25 | 11 | 6816047   | 6816047   | C    | T   | 203 | 0.25 | <i>OR6A2</i>                | NM_003696    | Missense        | p.R298H  | -4.09 | Deleterious | 0    | Damaging  | 1     | probably damaging |
| C25 | 11 | 62746961  | 62746961  | G    | A   | 67  | 0.13 | <i>SLC22A6</i>              | NM_004790    | Missense        | p.R454W  | -7.74 | Deleterious | 0    | Damaging  | 1     | probably damaging |
| C25 | 6  | 90354840  | 90354840  | C    | T   | 135 | 0.10 | <i>MDN1</i>                 | NM_014611    | Missense        | p.R5499Q | -3.39 | Deleterious | 0.13 | Tolerated | 1     | probably damaging |
| C25 | 4  | 186361839 | 186361839 | C    | G   | 77  | 0.23 | <i>C4orf47</i>              | NM_001114357 | Nonsense        | p.S227_  | NA    | NA          | NA   | NA        | NA    | NA                |
| C25 | 14 | 53098885  | 53098885  | C    | G   | 110 | 0.23 | <i>GPR137C</i>              | NM_001099652 | Missense        | p.S242C  | -3.23 | Deleterious | 0.01 | Damaging  | 1     | probably damaging |
| C26 | 18 | 63547790  | 63547790  | A    | C   | 321 | 0.12 | <i>CDH7</i>                 | NM_033646    | Missense        | p.N673T  | -4.27 | Deleterious | 0.08 | Tolerated | 0.98  | probably damaging |
| C27 | 19 | 43382182  | 43382182  | C    | A   | 64  | 0.23 | <i>PSG1</i>                 | NM_006905    | Missense        | p.A105S  | -1.87 | Neutral     | 0.01 | Damaging  | 0.986 | probably damaging |
| C27 | 2  | 60773366  | 60773366  | T    | TC  | 54  | 0.24 | <i>BCL11A</i>               | NM_022893    | Frame_Shift_Ins | p.D42fs  | NA    | NA          | NA   | NA        | NA    | NA                |
| C27 | 20 | 1162219   | 1162222   | GGCC | GA  | 43  | 0.53 | <i>TMEM74B</i>              | NM_018354    | Frame_Shift_Del | p.G14fs  | NA    | NA          | NA   | NA        | NA    | NA                |
| C27 | 14 | 24707823  | 24707823  | C    | A   | 105 | 0.25 | <i>GMPR2</i>                | NM_016576    | Missense        | p.P314T  | -5.93 | Deleterious | 0    | Damaging  | 0.999 | probably damaging |
| C27 | 8  | 110476977 | 110476977 | C    | A   | 122 | 0.25 | <i>PKHD1L1</i>              | NM_177531    | Missense        | p.T2639K | -1.12 | Neutral     | 0.92 | Tolerated | 0.332 | benign            |
| C27 | X  | 47086410  | 47086410  | A    | T   | 81  | 0.30 | <i>CDK16</i>                | NM_001170460 | Missense        | p.T459S  | -2.36 | Neutral     | 0.11 | Tolerated | 0.132 | benign            |
| C28 | 5  | 76335536  | 76335536  | G    | A   | 41  | 0.24 | <i>AGGF1</i>                | NM_018046    | Missense        | p.E288K  | -1.18 | Neutral     | 0.42 | Tolerated | 0.877 | possibly damaging |
| C28 | 6  | 26413657  | 26413657  | G    | C   | 80  | 0.24 | <i>BTN3A1</i>               | NM_007048    | Missense        | p.E427Q  | -0.54 | Neutral     | 0.79 | Tolerated | 0.077 | benign            |
| C28 | 7  | 113518362 | 113518362 | C    | T   | 65  | 0.14 | <i>PPP1R3A</i>              | NM_002711    | Missense        | p.E929K  | -0.82 | Neutral     | 0.18 | Tolerated | 0.002 | benign            |
| C28 | X  | 107407857 | 107407857 | C    | T   | 43  | 0.88 | <i>COL4A6</i>               | NM_001847    | Missense        | p.G1349R | -5.87 | Deleterious | 0    | Damaging  | 1     | probably damaging |
| C28 | 12 | 81655796  | 81655796  | A    | T   | 69  | 0.23 | <i>PPF1A2</i>               | NM_003625    | Missense        | p.L1247I | -0.8  | Neutral     | 0.02 | Damaging  | 0.982 | probably damaging |
| C28 | 19 | 45912243  | 45912243  | G    | A   | 76  | 0.22 | <i>CD3EAP</i>               | NM_012099    | Missense        | p.M339I  | -1.32 | Neutral     | 0.13 | Tolerated | 0.292 | benign            |

|     |    |           |           |    |    |     |      |                  |              |                 |          |       |             |      |           |       |                   |
|-----|----|-----------|-----------|----|----|-----|------|------------------|--------------|-----------------|----------|-------|-------------|------|-----------|-------|-------------------|
| C28 | 7  | 133682303 | 133682303 | G  | C  | 150 | 0.11 | <i>EXOC4</i>     | NM_021807    | Missense        | p.Q755H  | -0.59 | Neutral     | 0.12 | Tolerated | 0.904 | possibly damaging |
| C28 | 20 | 50769100  | 50769100  | C  | T  | 83  | 0.18 | <i>ZFP64</i>     | NM_018197    | Missense        | p.R544H  | -0.12 | Neutral     | 0.01 | Damaging  | 0.008 | benign            |
| C28 | 6  | 127765336 | 127765336 | C  | G  | 64  | 0.45 | <i>KIAA0408</i>  | NM_014702    | Missense        | p.R668T  | -3.05 | Deleterious | 0    | Damaging  | 1     | probably damaging |
| C28 | 11 | 106558438 | 106558438 | C  | T  | 90  | 0.48 | <i>GUCY1A2</i>   | NM_001256424 | Missense        | p.R710H  | -3.67 | Deleterious | 0.09 | Tolerated | 0.667 | possibly damaging |
| C28 | 19 | 17735637  | 17735637  | C  | T  | 21  | 0.43 | <i>UNC13A</i>    | NM_001080421 | Missense        | p.V1400M | NA    | NA          | NA   | NA        | NA    | NA                |
| C29 | 19 | 55284962  | 55284962  | C  | A  | 80  | 0.35 | <i>KIR2DL1</i>   | NM_014218    | Missense        | p.A83D   | -3.3  | Deleterious | 0    | Damaging  | 0.992 | probably damaging |
| C29 | 7  | 80387773  | 80387773  | A  | C  | 45  | 0.18 | <i>SEMA3C</i>    | NM_006379    | Missense        | p.V506G  | -6.2  | Deleterious | 0    | Damaging  | 0.925 | possibly damaging |
| C30 | 13 | 48947605  | 48947605  | G  | C  | 44  | 0.64 | <i>RBI</i>       | NM_000321    | Missense        | p.E398Q  | -1.4  | Neutral     | 0.25 | Tolerated | 0.544 | possibly damaging |
| C30 | 6  | 169632235 | 169632235 | T  | G  | 94  | 0.49 | <i>THBS2</i>     | NM_003247    | Missense        | p.E664A  | -2.97 | Deleterious | 0.23 | Tolerated | 0.997 | probably damaging |
| C30 | 22 | 39448661  | 39448662  | TC | T  | 82  | 0.44 | <i>APOBEC3F</i>  | NM_145298    | Frame_Shift_Del | p.F361fs | NA    | NA          | NA   | NA        | NA    | NA                |
| C30 | 19 | 46417600  | 46417600  | C  | T  | 59  | 0.42 | <i>NANOS2</i>    | NM_001029861 | Missense        | p.G118S  | -0.27 | Neutral     | 0.87 | Tolerated | 0.326 | benign            |
| C30 | 12 | 104124023 | 104124023 | G  | A  | 63  | 0.22 | <i>STAB2</i>     | NM_017564    | Missense        | p.G1738R | -1.66 | Neutral     | 0.54 | Tolerated | 0.99  | probably damaging |
| C30 | 1  | 94016536  | 94016536  | G  | C  | 80  | 0.41 | <i>FNBP1L</i>    | NM_001164473 | Missense        | p.G562R  | -6.7  | Deleterious | 0    | Damaging  | 1     | probably damaging |
| C30 | 2  | 39082371  | 39082371  | G  | A  | 99  | 0.09 | <i>DHX57</i>     | NM_198963    | Missense        | p.P578L  | -8.5  | Deleterious | 0.01 | Damaging  | 1     | probably damaging |
| C30 | 7  | 13940403  | 13940403  | C  | T  | 76  | 0.24 | <i>ETV1</i>      | NM_004956    | Missense        | p.R391H  | -4.77 | Deleterious | 0.01 | Damaging  | 1     | probably damaging |
| C30 | 6  | 27101172  | 27101172  | G  | GA | 100 | 0.58 | <i>HIST1H2AG</i> | NM_021064    | Frame_Shift_Ins | p.V108fs | NA    | NA          | NA   | NA        | NA    | NA                |
| C30 | 4  | 73981617  | 73981617  | A  | G  | 37  | 0.38 | <i>ANKRD17</i>   | NM_032217    | Missense        | p.V1402A | -3.28 | Deleterious | 0.08 | Tolerated | 0.997 | probably damaging |
| C31 | 6  | 169632236 | 169632236 | C  | T  | 125 | 0.32 | <i>THBS2</i>     | NM_003247    | Missense        | p.E664K  | -1.27 | Neutral     | 0.63 | Tolerated | 0.997 | probably damaging |
| C31 | 9  | 123163162 | 123163162 | C  | A  | 37  | 0.27 | <i>CDK5RAP2</i>  | NM_018249    | Missense        | p.G1770V | -2.85 | Deleterious | 0.22 | Tolerated | 0.994 | probably damaging |
| C31 | 12 | 80899904  | 80899904  | A  | T  | 51  | 0.57 | <i>PTPRQ</i>     | NM_001145026 | Nonsense        | p.K620_  | NA    | NA          | NA   | NA        | NA    | NA                |
| C31 | 10 | 69281671  | 69281671  | G  | A  | 148 | 0.22 | <i>CTNNA3</i>    | NM_001127384 | Missense        | p.L170F  | -2.81 | Deleterious | 0    | Damaging  | 0.999 | probably damaging |
| C31 | 3  | 78717047  | 78717047  | G  | T  | 68  | 0.56 | <i>ROBO1</i>     | NM_002941    | Missense        | p.P651Q  | -6.33 | Deleterious | NA   | NA        | 0.999 | probably damaging |
| C31 | 22 | 41923389  | 41923389  | G  | A  | 27  | 0.41 | <i>ACO2</i>      | NM_001098    | Missense        | p.R684Q  | -2    | Neutral     | 0.13 | Tolerated | 0.533 | possibly damaging |
| C31 | 16 | 88691668  | 88691668  | C  | T  | 67  | 0.39 | <i>ZC3H18</i>    | NM_144604    | Nonsense        | p.R701_  | NA    | NA          | 1    | Tolerated | NA    | NA                |
| C31 | X  | 30577847  | 30577847  | A  | G  | 115 | 0.46 | <i>CXorf21</i>   | NM_025159    | Missense        | p.V209A  | -1.62 | Neutral     | 0.16 | Tolerated | 0.005 | benign            |
| C31 | 11 | 119182869 | 119182869 | C  | T  | 182 | 0.45 | <i>MCAM</i>      | NM_006500    | Missense        | p.V346I  | 0.03  | Neutral     | 0.91 | Tolerated | 0.012 | benign            |
| C31 | 7  | 122303456 | 122303456 | A  | T  | 246 | 0.48 | <i>CADPS2</i>    | NM_001167940 | Nonsense        | p.Y207_  | NA    | NA          | 0.3  | Tolerated | NA    | NA                |
| C32 | 16 | 26147078  | 26147078  | G  | A  | 82  | 0.45 | <i>HS3ST4</i>    | NM_006040    | Missense        | p.A294T  | -3.56 | Deleterious | 0.01 | Damaging  | 1     | probably damaging |
| C32 | 15 | 55516147  | 55516147  | T  | A  | 325 | 0.50 | <i>RAB27A</i>    | NM_183234    | Missense        | p.D136V  | -8.69 | Deleterious | 0    | Damaging  | 1     | probably damaging |
| C32 | 11 | 8118835   | 8118835   | G  | A  | 40  | 0.28 | <i>TUB</i>       | NM_003320    | Missense        | p.D305N  | -0.39 | Neutral     | 0.41 | Tolerated | 0.045 | benign            |
| C32 | 2  | 33534563  | 33534563  | G  | T  | 101 | 0.57 | <i>LTBP1</i>     | NM_206943    | Missense        | p.G1182W | -7.54 | Deleterious | 0    | Damaging  | 1     | probably damaging |
| C32 | 17 | 10542681  | 10542681  | T  | G  | 71  | 0.55 | <i>MYH3</i>      | NM_002470    | Missense        | p.Q1012H | -3.51 | Deleterious | 0.1  | Tolerated | 1     | probably damaging |
| C32 | 3  | 52740168  | 52740168  | A  | G  | 14  | 0.36 | <i>SPCS1</i>     | NM_014041    | Missense        | p.Q36R   | 0.12  | Neutral     | 1    | Tolerated | 0     | benign            |

|     |    |           |           |    |              |     |      |                 |              |                 |                     |        |             |      |           |       |                   |
|-----|----|-----------|-----------|----|--------------|-----|------|-----------------|--------------|-----------------|---------------------|--------|-------------|------|-----------|-------|-------------------|
| C32 | 16 | 57552146  | 57552146  | C  | T            | 116 | 0.42 | <i>CCDC102A</i> | NM_033212    | Missense        | p.R361Q             | -3.99  | Deleterious | 0.05 | Damaging  | 0.999 | probably damaging |
| C32 | 20 | 44006195  | 44006195  | C  | T            | 27  | 0.41 | <i>TP53TG5</i>  | NM_014477    | Missense        | p.R36Q              | -2.63  | Deleterious | 0.08 | Tolerated | 0.95  | possibly damaging |
| C32 | 14 | 73735278  | 73735278  | G  | A            | 61  | 0.46 | <i>PAPLN</i>    | NM_173462    | Missense        | p.V1145M            | -1.63  | Neutral     | 0.09 | Tolerated | 0.876 | possibly damaging |
| C33 | 20 | 42788847  | 42788847  | C  | T            | 20  | 0.40 | <i>JPH2</i>     | NM_020433    | Missense        | p.A194T             | -0.91  | Neutral     | 0.41 | Tolerated | 0.003 | benign            |
| C33 | 2  | 68873139  | 68873139  | G  | T            | 163 | 0.42 | <i>PROKR1</i>   | NM_138964    | Missense        | p.K62N              | -2.37  | Neutral     | 0.18 | Tolerated | 0.155 | benign            |
| C33 | 19 | 40902993  | 40902993  | C  | A            | 98  | 0.40 | <i>PRX</i>      | NM_181882    | Missense        | p.M422I             | -2     | Neutral     | 0.4  | Tolerated | 0.004 | benign            |
| C33 | 19 | 51013587  | 51013587  | C  | G            | 68  | 0.34 | <i>JOSD2</i>    | NM_138334    | Missense        | p.Q34H              | -4.81  | Deleterious | 0    | Damaging  | 0.996 | probably damaging |
| C33 | 20 | 49626374  | 49626374  | G  | A            | 103 | 0.49 | <i>KCNG1</i>    | NM_002237    | Missense        | p.R168C             | -6.66  | Deleterious | NA   | NA        | 1     | probably damaging |
| C33 | 12 | 20769201  | 20769201  | G  | A            | 48  | 0.42 | <i>PDE3A</i>    | NM_000921    | Missense        | p.R436Q             | -3.18  | Deleterious | 0    | Damaging  | 1     | probably damaging |
| C33 | 1  | 115142855 | 115142855 | C  | T            | 176 | 0.41 | <i>DENND2C</i>  | NM_001256404 | Missense        | p.R692H             | -4.68  | Deleterious | 0    | Damaging  | 1     | probably damaging |
| C33 | 19 | 19656281  | 19656281  | G  | A            | 83  | 0.47 | <i>CILP2</i>    | NM_153221    | Missense        | p.R976Q             | -2.48  | Neutral     | 0.1  | Tolerated | 0.947 | possibly damaging |
| C33 | 16 | 81241118  | 81241118  | T  | G            | 53  | 0.47 | <i>PKD1L2</i>   | NM_001076780 | Missense        | p.T295P             | NA     | NA          | 0.01 | Damaging  | 0.993 | probably damaging |
| C34 | 1  | 156823691 | 156823691 | C  | T            | 66  | 0.44 | <i>INSRR</i>    | NM_014215    | Missense        | p.A164T             | 0.13   | Neutral     | 0.25 | Tolerated | 0.001 | benign            |
| C34 | 16 | 67578666  | 67578666  | C  | CCGGGG<br>GG | 83  | 0.29 | <i>FAM65A</i>   | NM_024519    | Frame_Shift_Ins | p.A954fs            | NA     | NA          | NA   | NA        | NA    | NA                |
| C34 | 19 | 34945455  | 34945455  | C  | A            | 40  | 0.38 | <i>UBA2</i>     | NM_005499    | Nonsense        | p.C413_             | NA     | NA          | 1    | Tolerated | NA    | NA                |
| C34 | 2  | 211158507 | 211158507 | C  | A            | 163 | 0.36 | <i>MYL1</i>     | NM_079420    | Nonsense        | p.E166_             | NA     | NA          | 0.02 | Damaging  | NA    | NA                |
| C34 | 12 | 63042357  | 63042357  | C  | A            | 56  | 0.20 | <i>PPM1H</i>    | NM_020700    | Missense        | p.G486V             | -5.97  | Deleterious | NA   | NA        | 1     | probably damaging |
| C34 | 1  | 55075191  | 55075191  | C  | T            | 51  | 0.37 | <i>FAM151A</i>  | NM_176782    | Missense        | p.G503E             | -1.82  | Neutral     | 0.52 | Tolerated | 0.012 | benign            |
| C34 | 19 | 15839720  | 15839720  | C  | G            | 161 | 0.24 | <i>OR10H2</i>   | NM_013939    | Missense        | p.I289M             | -0.71  | Neutral     | 0.54 | Tolerated | 0.998 | probably damaging |
| C34 | 16 | 21030965  | 21030965  | G  | C            | 61  | 0.31 | <i>DNAH3</i>    | NM_017539    | Missense        | p.N2001K            | -1.82  | Neutral     | 0.91 | Tolerated | 0.881 | possibly damaging |
| C34 | 10 | 43089790  | 43089790  | C  | T            | 167 | 0.40 | <i>ZNF33B</i>   | NM_006955    | Missense        | p.R203H             | 0.54   | Neutral     | 0.25 | Tolerated | 0     | benign            |
| C34 | 7  | 95439761  | 95439761  | C  | T            | 103 | 0.20 | <i>DYNC111</i>  | NM_004411    | Nonsense        | p.R56_              | NA     | NA          | 1    | Tolerated | NA    | NA                |
| C34 | 10 | 121551093 | 121551093 | C  | G            | 42  | 0.12 | <i>INPP5F</i>   | NM_014937    | Nonsense        | p.S127_             | NA     | NA          | 0.07 | Tolerated | NA    | NA                |
| C34 | X  | 153716361 | 153716361 | T  | C            | 113 | 0.29 | <i>SLC10A3</i>  | NM_001142392 | Missense        | p.S307G             | 1.72   | Neutral     | 0.61 | Tolerated | 0.003 | benign            |
| C34 | 9  | 115407938 | 115407938 | A  | C            | 54  | 0.59 | <i>KLAA1958</i> | NM_133465    | Missense        | p.T394P             | 1.13   | Neutral     | 0.25 | Tolerated | 0.995 | probably damaging |
| C34 | 14 | 60977881  | 60977881  | G  | A            | 72  | 0.13 | <i>SIX6</i>     | NM_007374    | Missense        | p.V218I             | -0.27  | Neutral     | 0.14 | Tolerated | 0.005 | benign            |
| C35 | 2  | 141232889 | 141232890 | TC | TTAGG        | 75  | 0.57 | <i>LRP1B</i>    | NM_018557    | In_Frame_Ins    | p.3147_3148in<br>sP | -12.41 | Deleterious | NA   | NA        | NA    | NA                |
| C35 | 3  | 101090891 | 101090891 | C  | T            | 126 | 0.37 | <i>SENP7</i>    | NM_020654    | Missense        | p.D253N             | -0.38  | Neutral     | 0.14 | Tolerated | 0.651 | possibly damaging |
| C35 | 18 | 19444508  | 19444508  | G  | A            | 152 | 0.45 | <i>MIB1</i>     | NM_020774    | Missense        | p.D968N             | -3.21  | Deleterious | 0.01 | Damaging  | 0.963 | probably damaging |
| C35 | 19 | 7927119   | 7927119   | G  | A            | 106 | 0.50 | <i>EVI5L</i>    | NM_001159944 | Missense        | p.E586K             | -3.03  | Deleterious | 0.07 | Tolerated | 0.835 | possibly damaging |
| C35 | 6  | 152527480 | 152527480 | A  | AGGGCT       | 18  | 0.33 | <i>SYNE1</i>    | NM_182961    | Frame_Shift_Ins | p.F7614fs           | NA     | NA          | NA   | NA        | NA    | NA                |

## AGTTC

|     |    |           |           |      |   |     |      |                 |              |              |          |       |             |      |           |       |                   |
|-----|----|-----------|-----------|------|---|-----|------|-----------------|--------------|--------------|----------|-------|-------------|------|-----------|-------|-------------------|
| C35 | 10 | 76797622  | 76797622  | C    | T | 27  | 0.59 | <i>DUPD1</i>    | NM_001003892 | Missense     | p.G212D  | -0.25 | Neutral     | 0.77 | Tolerated | 0.004 | benign            |
| C35 | 7  | 92888886  | 92888886  | C    | T | 125 | 0.57 | <i>CCDC132</i>  | NM_017667    | Nonsense     | p.Q201_  | NA    | NA          | 0.31 | Tolerated | NA    | NA                |
| C35 | 11 | 33886217  | 33886217  | C    | T | 72  | 0.58 | <i>LMO2</i>     | NM_005574    | Missense     | p.R132Q  | -3.67 | Deleterious | 0.51 | Tolerated | 0.996 | probably damaging |
| C35 | 6  | 80223162  | 80223162  | G    | A | 128 | 0.57 | <i>LCA5</i>     | NM_001122769 | Missense     | p.R163C  | -5.23 | Deleterious | 0    | Damaging  | 1     | probably damaging |
| C35 | 19 | 3620125   | 3620125   | C    | T | 43  | 0.33 | <i>CACTIN</i>   | NM_001080543 | Missense     | p.R295H  | -4.64 | Deleterious | NA   | NA        | 1     | probably damaging |
| C35 | 5  | 167824747 | 167824747 | C    | A | 47  | 0.64 | <i>WWC1</i>     | NM_001161661 | Missense     | p.S151Y  | -3.88 | Deleterious | 0.09 | Tolerated | 0.999 | probably damaging |
| C35 | 20 | 18163808  | 18163808  | C    | T | 140 | 0.44 | <i>CSRP2BP</i>  | NM_020536    | Missense     | p.S617L  | -1.96 | Neutral     | 0.18 | Tolerated | 0.014 | benign            |
| C35 | 9  | 124855504 | 124855504 | C    | T | 23  | 0.52 | <i>TTLL11</i>   | NM_001139442 | Missense     | p.S65N   | 0.03  | Neutral     | NA   | NA        | 0.718 | possibly damaging |
| C35 | 19 | 15083538  | 15083538  | G    | A | 100 | 0.29 | <i>SLCIA6</i>   | NM_005071    | Missense     | p.T62M   | -3.68 | Deleterious | 0    | Damaging  | 1     | probably damaging |
| C35 | 10 | 97194435  | 97194435  | A    | G | 164 | 0.48 | <i>SORBS1</i>   | NM_001034954 | Missense     | p.V39A   | -1.65 | Neutral     | 0    | Damaging  | 0.996 | probably damaging |
| C36 | 19 | 7918032   | 7918032   | G    | A | 162 | 0.31 | <i>EV15L</i>    | NM_001159944 | Missense     | p.A350T  | -3.36 | Deleterious | 0    | Damaging  | 0.982 | probably damaging |
| C36 | 9  | 133748403 | 133748403 | A    | G | 48  | 0.25 | <i>ABL1</i>     | NM_007313    | Missense     | p.E374G  | -6.75 | Deleterious | 0    | Damaging  | 1     | probably damaging |
| C36 | 4  | 1803576   | 1803576   | C    | T | 32  | 0.50 | <i>FGFR3</i>    | NM_001163213 | Missense     | p.R252W  | -6.7  | Deleterious | 0    | Damaging  | 1     | probably damaging |
| C36 | 20 | 37257577  | 37257577  | C    | T | 51  | 0.47 | <i>ARHGAP40</i> | NM_001164431 | Missense     | p.S188L  | -1.11 | Neutral     | 0.76 | Tolerated | NA    | NA                |
| C36 | 19 | 17922789  | 17922789  | C    | T | 185 | 0.11 | <i>B3GNT3</i>   | NM_014256    | Missense     | p.S326L  | -4.52 | Deleterious | 0.34 | Tolerated | 0.963 | probably damaging |
| C36 | 9  | 133747523 | 133747523 | C    | A | 125 | 0.11 | <i>ABL1</i>     | NM_007313    | Missense     | p.T296N  | -4.74 | Deleterious | 0    | Damaging  | 0.089 | benign            |
| C36 | 19 | 9089510   | 9089510   | C    | T | 121 | 0.20 | <i>MUC16</i>    | NM_024690    | Missense     | p.V769I  | 0.01  | Neutral     | 0    | Damaging  | 0     | benign            |
| C37 | 3  | 153203810 | 153203810 | G    | A | 64  | 0.25 | <i>C3orf79</i>  | NM_001101337 | Missense     | p.G47S   | -3.5  | Deleterious | 0    | Damaging  | 0.002 | benign            |
| C37 | 2  | 145147550 | 145147550 | T    | C | 95  | 0.29 | <i>ZEB2</i>     | NM_014795    | Missense     | p.H1038R | -7.28 | Deleterious | 0.08 | Tolerated | 0.992 | probably damaging |
| C37 | 3  | 111312899 | 111312902 | CTTG | C | 107 | 0.43 | <i>ZBED2</i>    | NM_024508    | In_Frame_Del | p.N49del | -2.9  | Deleterious | NA   | NA        | NA    | NA                |
| C37 | X  | 24844665  | 24844665  | G    | A | 103 | 0.26 | <i>POLA1</i>    | NM_016937    | Missense     | p.R1222Q | -3.7  | Deleterious | 0    | Damaging  | 1     | probably damaging |
| C37 | 3  | 126226844 | 126226844 | C    | T | 39  | 0.41 | <i>UROCI</i>    | NM_001165974 | Missense     | p.R169H  | -1.7  | Neutral     | 0    | Damaging  | 0.879 | possibly damaging |
| C37 | X  | 37948815  | 37948815  | G    | A | 35  | 0.23 | <i>SYTL5</i>    | NM_001163334 | Missense     | p.R269Q  | -1.04 | Neutral     | 0.57 | Tolerated | 0.414 | benign            |
| C37 | 16 | 78466519  | 78466519  | G    | A | 199 | 0.38 | <i>WWOX</i>     | NM_016373    | Missense     | p.R309H  | -3.44 | Deleterious | 0    | Damaging  | 0.999 | probably damaging |
| C37 | X  | 34148663  | 34148663  | G    | T | 140 | 0.41 | <i>FAM47A</i>   | NM_203408    | Missense     | p.S578Y  | -3.61 | Deleterious | 0.03 | Damaging  | 0.995 | probably damaging |
| C37 | 6  | 130363924 | 130363924 | C    | T | 169 | 0.22 | <i>L3MBTL3</i>  | NM_032438    | Missense     | p.T27M   | -3.26 | Deleterious | 0.05 | Damaging  | 1     | probably damaging |
| C37 | 1  | 16459788  | 16459788  | G    | A | 138 | 0.51 | <i>EPHA2</i>    | NM_004431    | Missense     | p.T647M  | -5.05 | Deleterious | 0    | Damaging  | 1     | probably damaging |
| C37 | 18 | 44104787  | 44104787  | C    | T | 105 | 0.40 | <i>LOXHD1</i>   | NM_144612    | Missense     | p.V1542M | -0.03 | Neutral     | 0.01 | Damaging  | 1     | probably damaging |
| C38 | 19 | 49926530  | 49926533  | CCAG | C | 73  | 0.11 | <i>PTH2</i>     | NM_178449    | In_Frame_Del | p.L22del | -1.56 | Neutral     | NA   | NA        | NA    | NA                |
| C38 | 11 | 107832848 | 107832848 | G    | A | 207 | 0.46 | <i>RAB39A</i>   | NM_017516    | Missense     | p.R135H  | -4.84 | Deleterious | 0    | Damaging  | 1     | probably damaging |
| C38 | 15 | 25223575  | 25223575  | G    | A | 18  | 0.28 | <i>SNRPN</i>    | NM_022806    | Missense     | p.R236H  | -0.96 | Neutral     | 0.08 | Tolerated | 0.006 | benign            |
| C38 | 19 | 15222526  | 15222526  | C    | T | 66  | 0.36 | <i>SYDE1</i>    | NM_033025    | Missense     | p.R501W  | -3.29 | Deleterious | 0.02 | Damaging  | 0.993 | probably damaging |

|     |    |           |           |             |        |     |      |                 |              |                 |           |       |             |      |           |       |                   |
|-----|----|-----------|-----------|-------------|--------|-----|------|-----------------|--------------|-----------------|-----------|-------|-------------|------|-----------|-------|-------------------|
| C38 | 1  | 154427014 | 154427018 | AGCCT       | AACA   | 81  | 0.11 | <i>IL6R</i>     | NM_000565    | Frame_Shift_Del | p.S373fs  | NA    | NA          | NA   | NA        | NA    | NA                |
| C38 | 12 | 49432060  | 49432060  | T           | TG     | 146 | 0.12 | <i>MLL2</i>     | NM_003482    | Frame_Shift_Ins | p.T3027fs | NA    | NA          | NA   | NA        | NA    | NA                |
| C38 | 4  | 55561808  | 55561808  | G           | A      | 220 | 0.25 | <i>KIT</i>      | NM_000222    | Nonsense        | p.W66_    | NA    | NA          | 1    | Tolerated | NA    | NA                |
| C39 | 15 | 55972314  | 55972314  | C           | T      | 145 | 0.48 | <i>PRTG</i>     | NM_173814    | Missense        | p.C304Y   | -9.8  | Deleterious | 0    | Damaging  | 1     | probably damaging |
| C39 | 14 | 89629231  | 89629231  | C           | T      | 76  | 0.22 | <i>FOXP3</i>    | NM_001085471 | Missense        | p.D334N   | -3.12 | Deleterious | 0.18 | Tolerated | 1     | probably damaging |
| C39 | 3  | 100093866 | 100093866 | C           | T      | 129 | 0.26 | <i>TOMM70A</i>  | NM_014820    | Missense        | p.G408E   | -5.76 | Deleterious | 0    | Damaging  | 1     | probably damaging |
| C39 | 12 | 49416138  | 49416138  | T           | A      | 32  | 0.50 | <i>MLL2</i>     | NM_003482    | Splice Site     | p.N5447sp | NA    | NA          | NA   | NA        | NA    | NA                |
| C39 | 7  | 88963897  | 88963897  | C           | T      | 171 | 0.13 | <i>ZNF804B</i>  | NM_181646    | Missense        | p.P534L   | 1.22  | Neutral     | 1    | Tolerated | 0     | benign            |
| C39 | 3  | 101284167 | 101284167 | G           | A      | 203 | 0.25 | <i>TRMT10C</i>  | NM_017819    | Missense        | p.R181Q   | -2.13 | Neutral     | 0.12 | Tolerated | 0.399 | benign            |
| C39 | 1  | 35370276  | 35370276  | G           | A      | 48  | 0.38 | <i>DLGAP3</i>   | NM_001080418 | Missense        | p.R237W   | -4.31 | Deleterious | 0    | Damaging  | 0.999 | probably damaging |
| C39 | 9  | 129958803 | 129958803 | C           | T      | 141 | 0.11 | <i>RALGPS1</i>  | NM_014636    | Missense        | p.S363L   | -1.06 | Neutral     | 0.12 | Tolerated | 0.348 | benign            |
| C40 | 4  | 54343013  | 54343013  | T           | C      | 94  | 0.39 | <i>LNX1</i>     | NM_001126328 | Missense        | p.D600G   | -1.73 | Neutral     | 0.42 | Tolerated | 0.032 | benign            |
| C40 | 12 | 6700692   | 6700692   | C           | T      | 178 | 0.15 | <i>CHD4</i>     | NM_001273    | Missense        | p.E1094K  | -3.59 | Deleterious | 0    | Damaging  | 1     | probably damaging |
| C40 | 9  | 21974799  | 21974799  | C           | CTT    | 29  | 0.79 | <i>CDKN2A</i>   | NM_000077    | Frame_Shift_Ins | p.E10fs   | NA    | NA          | NA   | NA        | NA    | NA                |
| C40 | 1  | 207225577 | 207225577 | C           | A      | 60  | 0.40 | <i>YOD1</i>     | NM_001276320 | Nonsense        | p.E2_     | NA    | NA          | 0.88 | Tolerated | NA    | NA                |
| C40 | 1  | 1735942   | 1735942   | C           | G      | 73  | 0.29 | <i>GNB1</i>     | NM_002074    | Missense        | p.G116R   | -7.06 | Deleterious | 0    | Damaging  | 0.998 | probably damaging |
| C40 | 9  | 138667193 | 138667193 | G           | A      | 50  | 0.60 | <i>KCNT1</i>    | NM_020822    | Missense        | p.G761S   | -5.76 | Deleterious | 0    | Damaging  | 1     | probably damaging |
| C40 | 2  | 43452637  | 43452637  | C           | CG     | 41  | 0.12 | <i>ZFP36L2</i>  | NM_006887    | Frame_Shift_Ins | p.K102fs  | NA    | NA          | NA   | NA        | NA    | NA                |
| C40 | 16 | 4626101   | 4626101   | G           | T      | 57  | 0.44 | <i>CI6orf96</i> | NM_001145011 | Missense        | p.K540N   | -1.29 | Neutral     | 0.32 | Tolerated | 0.997 | probably damaging |
| C40 | 6  | 157527665 | 157527675 | TGTTTGTTGTT | TAAAGC | 79  | 0.29 | <i>ARID1B</i>   | NM_017519    | Frame_Shift_Del | p.L1779fs | NA    | NA          | NA   | NA        | NA    | NA                |
| C40 | 19 | 10084845  | 10084845  | A           | G      | 224 | 0.34 | <i>COL5A3</i>   | NM_015719    | Splice Site     | p.M1168sp | NA    | NA          | NA   | NA        | NA    | NA                |
| C40 | 7  | 44805109  | 44805109  | C           | A      | 28  | 0.32 | <i>ZMIZ2</i>    | NM_031449    | Missense        | p.P725T   | -5.16 | Deleterious | 0.12 | Tolerated | 1     | probably damaging |
| C40 | 17 | 8791888   | 8791888   | G           | A      | 55  | 0.40 | <i>PIK3R5</i>   | NM_014308    | Missense        | p.R406C   | -0.12 | Neutral     | 0.06 | Tolerated | 0.7   | possibly damaging |
| C40 | 5  | 63890629  | 63890629  | G           | A      | 30  | 0.37 | <i>RGS7BP</i>   | NM_001029875 | Missense        | p.V186I   | -0.3  | Neutral     | 0.45 | Tolerated | 0.001 | benign            |
| C40 | 6  | 29797631  | 29797631  | G           | C      | 93  | 0.10 | <i>HLA-G</i>    | NM_002127    | Missense        | p.V312L   | -0.82 | Neutral     | 0    | Damaging  | 0.054 | benign            |
| C40 | 6  | 34003582  | 34003582  | C           | T      | 122 | 0.42 | <i>GRM4</i>     | NM_000841    | Missense        | p.V769M   | -2.2  | Neutral     | 0.04 | Damaging  | 0.999 | probably damaging |
| C40 | 3  | 50404342  | 50404342  | C           | T      | 100 | 0.46 | <i>CACNA2D2</i> | NM_001174051 | Missense        | p.V844I   | -0.16 | Neutral     | 0.53 | Tolerated | 0.703 | possibly damaging |
| C41 | 11 | 120008124 | 120008124 | C           | T      | 44  | 0.36 | <i>TRIM29</i>   | NM_012101    | Missense        | p.A206T   | -1.57 | Neutral     | NA   | NA        | 1     | probably damaging |
| C41 | 1  | 152777633 | 152777633 | C           | T      | 28  | 0.32 | <i>LCE1C</i>    | NM_178351    | Missense        | p.G108R   | -2.94 | Deleterious | 0    | Damaging  | 1     | probably damaging |
| C41 | 8  | 77768194  | 77768194  | G           | A      | 164 | 0.34 | <i>ZFX4</i>     | NM_024721    | Missense        | p.G3013R  | -5.37 | Deleterious | 0.03 | Damaging  | 1     | probably damaging |
| C41 | 11 | 134239725 | 134239725 | G           | A      | 114 | 0.40 | <i>GLB1L2</i>   | NM_138342    | Missense        | p.G352S   | -5.63 | Deleterious | 0    | Damaging  | 1     | probably damaging |
| C41 | 16 | 3788596   | 3788596   | A           | ACC    | 80  | 0.38 | <i>CREBBP</i>   | NM_004380    | Frame_Shift_Ins | p.I1453fs | NA    | NA          | NA   | NA        | NA    | NA                |
| C41 | 12 | 120208588 | 120208588 | C           | T      | 128 | 0.30 | <i>CIT</i>      | NM_001206999 | Splice Site     | p.L736sp  | NA    | NA          | NA   | NA        | NA    | NA                |

|     |    |           |           |                      |      |     |      |                 |              |              |                     |        |             |      |           |       |                   |
|-----|----|-----------|-----------|----------------------|------|-----|------|-----------------|--------------|--------------|---------------------|--------|-------------|------|-----------|-------|-------------------|
| C41 | 1  | 155874261 | 155874261 | C                    | T    | 50  | 0.32 | <i>RIT1</i>     | NM_001256821 | Missense     | p.M107I             | -3.99  | Deleterious | 0.06 | Tolerated | 0.999 | probably damaging |
| C41 | 1  | 42654583  | 42654583  | C                    | G    | 70  | 0.50 | <i>FOXJ3</i>    | NM_001198851 | Missense     | p.M490I             | -1.23  | Neutral     | 0.01 | Damaging  | 0.067 | benign            |
| C41 | 16 | 20559743  | 20559743  | C                    | T    | 80  | 0.34 | <i>ACSM2B</i>   | NM_001105069 | Missense     | p.R316Q             | -3.28  | Deleterious | 0.02 | Damaging  | 0.983 | probably damaging |
| C41 | 22 | 40042778  | 40042778  | C                    | T    | 83  | 0.39 | <i>CACNA1I</i>  | NM_021096    | Missense     | p.R452C             | -6.25  | Deleterious | 0.01 | Damaging  | 1     | probably damaging |
| C41 | 2  | 179612384 | 179612384 | G                    | A    | 235 | 0.15 | <i>TTN</i>      | NM_133379    | Missense     | p.R4915C            | -0.81  | Neutral     | 0.07 | Tolerated | 0.85  | possibly damaging |
| C41 | 10 | 129901283 | 129901283 | T                    | C    | 68  | 0.47 | <i>MKI67</i>    | NM_002417    | Missense     | p.S2941G            | -1.25  | Neutral     | 0.38 | Tolerated | 0.907 | possibly damaging |
| C43 | 10 | 118451956 | 118451956 | G                    | A    | 77  | 0.42 | <i>HSPA12A</i>  | NM_025015    | Missense     | p.S190L             | -2.01  | Neutral     | 0.11 | Tolerated | 0.006 | benign            |
| C43 | 11 | 134253729 | 134253729 | C                    | T    | 71  | 0.34 | <i>B3GATI</i>   | NM_054025    | Missense     | p.G156R             | -0.8   | Neutral     | 0.5  | Tolerated | 0.017 | benign            |
| C43 | 12 | 64472862  | 64472862  | C                    | A    | 48  | 0.40 | <i>SRGAP1</i>   | NM_020762    | Missense     | p.A430D             | -4.6   | Deleterious | NA   | NA        | 0.991 | probably damaging |
| C43 | 20 | 20226778  | 20226778  | A                    | T    | 172 | 0.31 | <i>C20orf26</i> | NM_015585    | Missense     | p.N693I             | -6.6   | Deleterious | 0.04 | Damaging  | 0.991 | probably damaging |
| C43 | 4  | 103498066 | 103498066 | G                    | T    | 141 | 0.33 | <i>NFKB1</i>    | NM_003998    | Missense     | p.K147N             | -4.12  | Deleterious | 0    | Damaging  | 1     | probably damaging |
| C43 | 6  | 147049845 | 147049845 | C                    | A    | 90  | 0.09 | <i>ADGB</i>     | NM_024694    | Missense     | p.H830N             | -0.81  | Neutral     | 0.52 | Tolerated | 0     | benign            |
| C43 | 6  | 56426287  | 56426287  | A                    | T    | 176 | 0.35 | <i>DST</i>      | NM_001144769 | Missense     | p.L2591H            | -2.65  | Deleterious | 0.12 | Tolerated | 0.996 | probably damaging |
| C43 | 9  | 32632278  | 32632278  | C                    | A    | 105 | 0.35 | <i>TAFIL</i>    | NM_153809    | Missense     | p.E1100D            | -2.22  | Neutral     | 0.26 | Tolerated | 0.044 | benign            |
| C43 | 12 | 11905512  | 11905513  | G                    | GC   | 29  | 0.31 | <i>ETV6</i>     | NM_001987    | Splice Site  | p.R55sp             | NA     | NA          | NA   | NA        | NA    | NA                |
| C43 | 12 | 92538064  | 92538067  | G                    | GGTC | 67  | 0.21 | <i>BTG1</i>     | NM_001731    | In_Frame_Ins | p.103_103T>R<br>P   | -15.62 | Deleterious | NA   | NA        | NA    | NA                |
| C44 | 12 | 111908474 | 111908474 | C                    | T    | 106 | 0.39 | <i>ATXN2</i>    | NM_002973    | Missense     | p.G1024D            | -4.86  | Deleterious | 0.12 | Tolerated | 1     | probably damaging |
| C44 | 12 | 112888189 | 112888189 | G                    | A    | 95  | 0.46 | <i>PTPN11</i>   | NM_002834    | Missense     | p.E69K              | -3.44  | Deleterious | 0    | Damaging  | 0.987 | probably damaging |
| C44 | 13 | 37439770  | 37439770  | C                    | T    | 46  | 0.22 | <i>SMAD9</i>    | NM_001127217 | Missense     | p.D303N             | -3.38  | Deleterious | 0.16 | Tolerated | 0.811 | possibly damaging |
| C44 | 16 | 57702302  | 57702302  | C                    | A    | 25  | 0.24 | <i>GPR97</i>    | NM_170776    | Missense     | p.L15M              | -0.47  | Neutral     | 0.06 | Tolerated | 0.98  | probably damaging |
| C44 | 17 | 4446282   | 4446282   | C                    | G    | 124 | 0.54 | <i>MYBBP1A</i>  | NM_001105538 | Missense     | p.E940Q             | -0.85  | Neutral     | 0.42 | Tolerated | 0.557 | possibly damaging |
| C44 | 18 | 6962054   | 6962054   | C                    | A    | 212 | 0.22 | <i>LAMA1</i>    | NM_005559    | Missense     | p.G2448C            | -4.83  | Deleterious | 0.06 | Tolerated | 0.999 | probably damaging |
| C44 | 19 | 49116250  | 49116250  | C                    | T    | 44  | 0.11 | <i>FAM83E</i>   | NM_017708    | Missense     | p.R127Q             | -3.94  | Deleterious | 0    | Damaging  | 0.901 | possibly damaging |
| C44 | 20 | 57045782  | 57045782  | C                    | A    | 19  | 0.11 | <i>APCDD1L</i>  | NM_153360    | Missense     | p.G24V              | -2.07  | Neutral     | 0.08 | Tolerated | 0.893 | possibly damaging |
| C44 | 3  | 113866342 | 113866342 | C                    | T    | 51  | 0.20 | <i>DRD3</i>     | NM_000796    | Missense     | p.R149H             | -4.24  | Deleterious | 0    | Damaging  | 1     | probably damaging |
| C44 | 3  | 75714034  | 75714034  | C                    | G    | 25  | 0.12 | <i>FRG2C</i>    | NM_001124759 | Missense     | p.S81R              | -1.4   | Neutral     | 0.2  | Tolerated | 0.978 | probably damaging |
| C44 | 6  | 102376488 | 102376488 | C                    | A    | 144 | 0.28 | <i>GRIK2</i>    | NM_021956    | Missense     | p.A689E             | -2.37  | Neutral     | 0    | Damaging  | 0.995 | probably damaging |
| C44 | 9  | 121976256 | 121976256 | T                    | C    | 102 | 0.28 | <i>DBC1</i>     | NM_014618    | Missense     | p.Y288C             | -1.51  | Neutral     | 0.03 | Damaging  | 0.867 | possibly damaging |
| C44 | 1  | 152975658 | 152975658 | CTGTACCAA<br>GGTCCCT | A    | 71  | 0.38 | <i>SPRR3</i>    | NM_005416    | In_Frame_Del | p.EPGCTKVP<br>95del | -9.33  | Deleterious | NA   | NA        | NA    | NA                |
| C45 | 1  | 115258744 | 115258744 | C                    | T    | 36  | 0.42 | <i>NRAS</i>     | NM_002524    | Missense     | p.G13D              | -5.48  | Deleterious | 0.03 | Damaging  | 0.434 | benign            |

|     |    |           |           |      |         |     |      |                 |              |                 |                    |        |             |      |           |       |                   |
|-----|----|-----------|-----------|------|---------|-----|------|-----------------|--------------|-----------------|--------------------|--------|-------------|------|-----------|-------|-------------------|
| C45 | 12 | 52794403  | 52794403  | C    | T       | 81  | 0.46 | <i>KRT82</i>    | NM_033033    | Missense        | p.V229M            | -2.73  | Deleterious | 0    | Damaging  | 1     | probably damaging |
| C45 | 15 | 75970059  | 75970059  | G    | T       | 49  | 0.49 | <i>CSPG4</i>    | NM_001897    | Missense        | p.L1707I           | -0.51  | Neutral     | 0.16 | Tolerated | 0.996 | probably damaging |
| C45 | X  | 150908126 | 150908126 | G    | T       | 111 | 0.22 | <i>CNGA2</i>    | NM_005140    | Missense        | p.R99L             | -3.04  | Deleterious | 0.08 | Tolerated | 0.546 | possibly damaging |
| C46 | 1  | 145293566 | 145293566 | G    | A       | 14  | 0.14 | <i>NBPF10</i>   | NM_001039703 | Missense        | p.R54Q             | 0.82   | Neutral     | 1    | Tolerated | NA    | NA                |
|     |    |           |           |      | GGGCTCC |     |      |                 |              |                 |                    |        |             |      |           |       |                   |
| C46 | 17 | 72889676  | 72889694  | G    | GTAGGTT | 49  | 0.24 | <i>FADS6</i>    | NM_178128    |                 | p.6_6P>PMEP<br>TEP | 0.08   | Neutral     | NA   | NA        | NA    | NA                |
|     |    |           |           |      | CCATG   |     |      |                 |              | In_Frame_Ins    |                    |        |             |      |           |       |                   |
| C47 | 11 | 34140049  | 34140049  | A    | C       | 40  | 0.60 | <i>NAT10</i>    | NM_024662    | Missense        | p.Q260P            | -5.88  | Deleterious | 0    | Damaging  | 1     | probably damaging |
| C47 | 12 | 112926900 | 112926900 | C    | A       | 50  | 0.42 | <i>PTPN11</i>   | NM_002834    | Missense        | p.T507K            | -5.22  | Deleterious | 0    | Damaging  | 0.995 | probably damaging |
| C47 | 16 | 1259318   | 1259318   | G    | A       | 129 | 0.45 | <i>CACNA1H</i>  | NM_021098    | Missense        | p.R1217H           | -0.8   | Neutral     | 0    | Damaging  | 0.964 | probably damaging |
| C47 | 2  | 112834830 | 112834830 | A    | C       | 45  | 0.33 | <i>TMEM87B</i>  | NM_032824    | Missense        | p.E188A            | -1.27  | Neutral     | 0.49 | Tolerated | 0.459 | possibly damaging |
| C47 | 21 | 47417641  | 47417641  | G    | A       | 20  | 0.50 | <i>COL6A1</i>   | NM_001848    | Missense        | p.G497R            | -5.93  | Deleterious | 0    | Damaging  | 1     | probably damaging |
| C47 | 7  | 148526913 | 148526913 | T    | G       | 34  | 0.29 | <i>EZH2</i>     | NM_004456    | Missense        | p.I131L            | -1.93  | Neutral     | 0.09 | Tolerated | 0.045 | benign            |
| C47 | X  | 38033523  | 38033523  | G    | T       | 20  | 0.10 | <i>SRPX</i>     | NM_006307    | Missense        | p.A80D             | -1.18  | Neutral     | 0.26 | Tolerated | 0.87  | possibly damaging |
|     |    |           |           |      | GGGGGC  |     |      |                 |              |                 |                    |        |             |      |           |       |                   |
| C47 | 11 | 62364130  | 62364136  | G    | A       | 84  | 0.23 | <i>MTA2</i>     | NM_004739    |                 | p.287_288ins<br>AP | -9.67  | Deleterious | NA   | NA        | NA    | NA                |
|     |    |           |           |      |         |     |      |                 |              | In_Frame_Ins    |                    |        |             |      |           |       |                   |
| C47 | 7  | 148526914 | 148526914 | GTTA | G       | 34  | 0.29 | <i>EZH2</i>     | NM_004456    | In_Frame_Del    | p.N130del          | -15.27 | Deleterious | NA   | NA        | NA    | NA                |
| C47 | Y  | 15417399  | 15417399  | T    | TA      | 20  | 0.80 | <i>UTY</i>      | NM_001258249 | Frame_Shift_Ins | p.T1051fs          | NA     | NA          | NA   | NA        | NA    | NA                |
| C48 | 17 | 42980123  | 42980123  | G    | A       | 47  | 0.11 | <i>CCDC103</i>  | NM_213607    | Missense        | p.G223S            | -0.03  | Neutral     | 0.61 | Tolerated | 0.22  | benign            |
| C48 | 3  | 195507925 | 195507925 | C    | T       | 20  | 0.20 | <i>MUC4</i>     | NM_018406    | Missense        | p.G3509D           | 0.22   | Neutral     | NA   | NA        | 0.003 | benign            |
| C48 | 3  | 50333012  | 50333012  | C    | A       | 15  | 0.13 | <i>HYAL3</i>    | NM_001200029 | Missense        | p.A8S              | -0.97  | Neutral     | 0.39 | Tolerated | 0.009 | benign            |
| C48 | 4  | 184129219 | 184129219 | C    | T       | 66  | 0.18 | <i>WWC2</i>     | NM_024949    | Missense        | p.H119Y            | -1.71  | Neutral     | 0    | Damaging  | 0.337 | benign            |
| C48 | 9  | 35547618  | 35547618  | G    | A       | 98  | 0.18 | <i>RUSC2</i>    | NM_014806    | Missense        | p.R367H            | 0.91   | Neutral     | 0.62 | Tolerated | 0     | benign            |
| C48 | 9  | 79252335  | 79252335  | G    | A       | 130 | 0.12 | <i>PRUNE2</i>   | NM_015225    | Missense        | p.R2988W           | -5.45  | Deleterious | 0    | Damaging  | 1     | probably damaging |
| C49 | 12 | 109698323 | 109698323 | G    | A       | 60  | 0.38 | <i>ACACB</i>    | NM_001093    | Missense        | p.V2179M           | -2.79  | Deleterious | 0    | Damaging  | 1     | probably damaging |
| C49 | 12 | 112186172 | 112186172 | C    | A       | 44  | 0.09 | <i>ACAD10</i>   | NM_001136538 | Missense        | p.P877Q            | -3.56  | Deleterious | 0.1  | Tolerated | 0.999 | probably damaging |
| C49 | 12 | 49087925  | 49087925  | T    | C       | 195 | 0.43 | <i>CCNT1</i>    | NM_001240    | Missense        | p.T358A            | 0.12   | Neutral     | 0.76 | Tolerated | 0.001 | benign            |
| C49 | 19 | 55237768  | 55237768  | C    | T       | 69  | 0.36 | <i>KIR3DL3</i>  | NM_153443    | Missense        | p.S107L            | -3.91  | Deleterious | 0.03 | Damaging  | 0.955 | possibly damaging |
| C49 | 2  | 120197712 | 120197712 | C    | T       | 24  | 0.08 | <i>SCTR</i>     | NM_002980    | Missense        | p.C435Y            | -1.22  | Neutral     | 1    | Tolerated | 0     | benign            |
| C49 | 4  | 77691818  | 77691818  | C    | A       | 41  | 0.39 | <i>SHROOM3</i>  | NM_020859    | Missense        | p.L1797I           | -1.95  | Neutral     | 0    | Damaging  | 1     | probably damaging |
| C49 | 7  | 16649289  | 16649289  | T    | C       | 60  | 0.42 | <i>ANKMY2</i>   | NM_020319    | Missense        | p.Q283R            | -1.83  | Neutral     | 0.56 | Tolerated | 0.145 | benign            |
| C49 | 8  | 22105765  | 22105765  | A    | G       | 44  | 0.23 | <i>POLR3D</i>   | NM_001722    | Missense        | p.I154V            | -0.55  | Neutral     | 0.52 | Tolerated | 0.802 | possibly damaging |
| C49 | 14 | 35742652  | 35742653  | C    | CA      | 62  | 0.37 | <i>KLAA0391</i> | NM_014672    | Frame_Shift_Ins | p.S544fs           | NA     | NA          | NA   | NA        | NA    | NA                |



|     |    |           |           |            |    |     |      |                 |              |                 |            |       |             |      |           |       |                   |
|-----|----|-----------|-----------|------------|----|-----|------|-----------------|--------------|-----------------|------------|-------|-------------|------|-----------|-------|-------------------|
| C49 | 14 | 35742656  | 35742656  | GACACA     | G  | 46  | 0.20 | <i>KIAA0391</i> | NM_014672    | Frame_Shift_Del | p.D546fs   | NA    | NA          | NA   | NA        | NA    | NA                |
| C51 | 1  | 115258748 | 115258748 | C          | T  | 48  | 0.10 | <i>NRAS</i>     | NM_002524    | Missense        | p.G12S     | -4.44 | Deleterious | 0.04 | Damaging  | 0.329 | benign            |
| C51 | 5  | 16781904  | 16781904  | C          | T  | 146 | 0.14 | <i>MYO10</i>    | NM_012334    | Missense        | p.V213M    | -2.43 | Neutral     | 0    | Damaging  | 1     | probably damaging |
|     |    |           |           | CCCAGGTCCA |    |     |      |                 |              |                 |            |       |             |      |           |       |                   |
|     |    |           |           | GGGCCCCCT  |    |     |      |                 |              |                 |            |       |             |      |           |       |                   |
|     |    |           |           | TCTCAGGCC  |    |     |      |                 |              |                 | p.EKPPLPQP |       |             |      |           |       |                   |
| C51 | 9  | 139272464 | 139272464 | AGGCTGGGG  | C  | 18  | 0.33 | <i>SNAPC4</i>   | NM_003086    | In_Frame_Del    | GPEKGALDL  | -3.72 | Deleterious | NA   | NA        | NA    | NA                |
|     |    |           |           | TAGGGGCG   |    |     |      |                 |              |                 | 1255del    |       |             |      |           |       |                   |
|     |    |           |           | GCTTCT     |    |     |      |                 |              |                 |            |       |             |      |           |       |                   |
| C54 | 1  | 209961775 | 209961775 | G          | A  | 24  | 0.42 | <i>IRF6</i>     | NM_006147    | Missense        | p.P465L    | -0.45 | Neutral     | 0.18 | Tolerated | 0.08  | benign            |
| C54 | 11 | 121030929 | 121030929 | C          | A  | 144 | 0.53 | <i>TECTA</i>    | NM_005422    | Missense        | p.T1592N   | -3.37 | Deleterious | 0.01 | Damaging  | 0.939 | possibly damaging |
| C54 | 10 | 70968723  | 70968723  | G          | GA | 34  | 0.41 | <i>SUPV3L1</i>  | NM_003171    | Frame_Shift_Ins | p.E765fs   | NA    | NA          | NA   | NA        | NA    | NA                |
| C54 | 2  | 43452511  | 43452511  | G          | GC | 134 | 0.32 | <i>ZFP36L2</i>  | NM_006887    | Frame_Shift_Ins | p.G144fs   | NA    | NA          | NA   | NA        | NA    | NA                |
| C54 | 20 | 62705521  | 62705521  | GTAGT      | G  | 122 | 0.13 | <i>RGS19</i>    | NM_005873    | Frame_Shift_Del | p.Y146fs   | NA    | NA          | NA   | NA        | NA    | NA                |
| C55 | 12 | 25378647  | 25378647  | T          | A  | 48  | 0.48 | <i>KRAS</i>     | NM_033360    | Missense        | p.K117N    | -4.56 | Deleterious | 0.01 | Damaging  | 1     | probably damaging |
| C55 | 3  | 49162595  | 49162595  | C          | A  | 80  | 0.43 | <i>LAMB2</i>    | NM_002292    | Missense        | p.A910S    | 0.35  | Neutral     | 0.6  | Tolerated | 0.412 | benign            |
| C55 | 7  | 128486205 | 128486205 | G          | A  | 64  | 0.30 | <i>FLNC</i>     | NM_001458    | Missense        | p.A1318T   | -0.8  | Neutral     | 0    | Damaging  | 0.95  | possibly damaging |
| C56 | 1  | 115258747 | 115258747 | C          | T  | 41  | 0.46 | <i>NRAS</i>     | NM_002524    | Missense        | p.G12D     | -5.35 | Deleterious | 0    | Damaging  | 0.372 | benign            |
| C56 | 1  | 247875276 | 247875276 | C          | T  | 103 | 0.37 | <i>OR6F1</i>    | NM_001005286 | Missense        | p.R261H    | -3.74 | Deleterious | 0    | Damaging  | 1     | probably damaging |
| C56 | 10 | 118661351 | 118661351 | G          | A  | 131 | 0.31 | <i>KIAA1598</i> | NM_001127211 | Missense        | p.P533L    | -0.55 | Neutral     | 0.04 | Damaging  | 0.007 | benign            |
| C56 | 10 | 49444566  | 49444566  | C          | A  | 29  | 0.10 | <i>FRMPD2</i>   | NM_001018071 | nonsense        | p.G318_    | NA    | NA          | 0.56 | Tolerated | NA    | NA                |
| C56 | 11 | 45928199  | 45928199  | C          | T  | 56  | 0.43 | <i>C11orf94</i> | NM_001080446 | Missense        | p.R73Q     | -0.63 | Neutral     | 0.08 | Tolerated | 0.786 | possibly damaging |
| C56 | 11 | 4790354   | 4790354   | C          | T  | 80  | 0.38 | <i>OR51F1</i>   | NM_001004752 | Missense        | p.R265H    | -4.36 | Deleterious | 0.01 | Damaging  | 0.865 | possibly damaging |
| C56 | 19 | 2216563   | 2216563   | C          | A  | 24  | 0.08 | <i>DOTIL</i>    | NM_032482    | Missense        | p.P736H    | -2.54 | Deleterious | 0    | Damaging  | 0.999 | probably damaging |
| C56 | 2  | 116572427 | 116572427 | G          | A  | 86  | 0.49 | <i>DPP10</i>    | NM_001178034 | Missense        | p.V591I    | -0.77 | Neutral     | 0.05 | Damaging  | 0.995 | probably damaging |
| C56 | 22 | 23523656  | 23523656  | C          | T  | 69  | 0.33 | <i>BCR</i>      | NM_004327    | Missense        | p.A170V    | -1.18 | Neutral     | 0.09 | Tolerated | 0.254 | benign            |
| C56 | 4  | 436233    | 436233    | C          | T  | 101 | 0.29 | <i>ZNF721</i>   | NM_133474    | Missense        | p.G675S    | -3.93 | Deleterious | 0.03 | Damaging  | 0.994 | probably damaging |
| C56 | 5  | 172560650 | 172560650 | C          | A  | 98  | 0.27 | <i>CREBRF</i>   | NM_153607    | Missense        | p.Q608K    | -1.18 | Neutral     | 0.11 | Tolerated | 0.865 | possibly damaging |
| C56 | 7  | 140453153 | 140453153 | A          | C  | 24  | 0.29 | <i>BRAF</i>     | NM_004333    | Missense        | p.D594E    | -3.59 | Deleterious | 0    | Damaging  | 1     | probably damaging |
| C56 | 7  | 63673527  | 63673527  | C          | G  | 120 | 0.40 | <i>ZNF735</i>   | NM_001159524 | Missense        | p.L33V     | NA    | NA          | NA   | NA        | NA    | NA                |
| C56 | 1  | 50884699  | 50884699  | C          | A  | 21  | 0.10 | <i>DMRTA2</i>   | NM_032110    | Missense        | p.A423S    | -0.45 | Neutral     | 0.07 | Tolerated | 0.953 | possibly damaging |
| C56 | 2  | 31560683  | 31560683  | C          | A  | 24  | 0.08 | <i>XDHI</i>     | NM_000379    | Missense        | p.A1259S   | -2.35 | Neutral     | 0.03 | Damaging  | 0.989 | probably damaging |
| C57 | 11 | 120686132 | 120686132 | C          | G  | 29  | 0.48 | <i>GRIK4</i>    | NM_014619    | Missense        | p.S98W     | -4.01 | Deleterious | 0    | Damaging  | 1     | probably damaging |

|     |    |           |           |   |   |     |      |                 |              |             |          |       |             |      |           |       |                   |
|-----|----|-----------|-----------|---|---|-----|------|-----------------|--------------|-------------|----------|-------|-------------|------|-----------|-------|-------------------|
| C57 | 12 | 25398284  | 25398284  | C | A | 64  | 0.28 | <i>KRAS</i>     | NM_033360    | Missense    | p.G12V   | -7.11 | Deleterious | 0.01 | Damaging  | 0.999 | probably damaging |
| C57 | 19 | 14261828  | 14261828  | G | T | 21  | 0.10 | <i>LPHN1</i>    | NM_001008701 | Missense    | p.P1428T | -0.32 | Neutral     | 0.06 | Tolerated | 0.994 | probably damaging |
| C57 | 19 | 3760231   | 3760231   | G | A | 48  | 0.50 | <i>APBA3</i>    | NM_004886    | Missense    | p.S11L   | -1.98 | Neutral     | 0.09 | Tolerated | 0     | benign            |
| C57 | 20 | 46307420  | 46307420  | C | A | 23  | 0.09 | <i>SULF2</i>    | NM_018837    | Missense    | p.R398L  | -4.22 | Deleterious | NA   | NA        | 1     | probably damaging |
| C57 | 21 | 39795341  | 39795341  | C | T | 27  | 0.37 | <i>ERG</i>      | NM_001243428 | Missense    | p.V134M  | -1.74 | Neutral     | 0    | Damaging  | 1     | probably damaging |
| C57 | 3  | 97720503  | 97720503  | G | T | 92  | 0.35 | <i>GABRR3</i>   | NM_001105580 | nonsense    | p.S288_  | NA    | NA          | NA   | NA        | NA    | NA                |
| C57 | 4  | 114177072 | 114177072 | C | T | 41  | 0.32 | <i>ANK2</i>     | NM_0011148   | Missense    | p.P391L  | -9.1  | Deleterious | 0.05 | Damaging  | 0.971 | probably damaging |
| C57 | 4  | 146073788 | 146073788 | C | A | 45  | 0.09 | <i>OTUD4</i>    | NM_001102653 | Splice Site | p.V227sp | NA    | NA          | NA   | NA        | NA    | NA                |
| C57 | 4  | 1806171   | 1806171   | G | A | 47  | 0.34 | <i>FGFR3</i>    | NM_001163213 | Missense    | p.R399H  | -3.16 | Deleterious | 0.2  | Tolerated | 0.925 | possibly damaging |
| C57 | 4  | 71824700  | 71824700  | C | T | 102 | 0.09 | <i>MOB1B</i>    | NM_001244766 | Missense    | p.R47W   | -6.39 | Deleterious | 0    | Damaging  | 1     | probably damaging |
| C57 | 6  | 55198589  | 55198589  | G | T | 60  | 0.42 | <i>GFRAL</i>    | NM_207410    | Missense    | p.G55C   | -2.18 | Neutral     | 0.12 | Tolerated | 0.502 | possibly damaging |
| C57 | X  | 7890140   | 7890140   | C | A | 22  | 0.18 | <i>PNPLA4</i>   | NM_004650    | Splice Site | p.E61sp  | NA    | NA          | NA   | NA        | NA    | NA                |
| C58 | 1  | 15689212  | 15689212  | G | A | 30  | 0.53 | <i>FHAD1</i>    | NM_052929    | Missense    | p.E991K  | -1.86 | Neutral     | 0.47 | Tolerated | 0.882 | possibly damaging |
| C58 | 12 | 15811502  | 15811502  | G | A | 125 | 0.45 | <i>EPS8</i>     | NM_004447    | Missense    | p.R319W  | -7.55 | Deleterious | 0    | Damaging  | 1     | probably damaging |
| C58 | 12 | 25398285  | 25398285  | C | T | 94  | 0.10 | <i>KRAS</i>     | NM_033360    | Missense    | p.G12S   | -4.44 | Deleterious | 0.01 | Damaging  | 0.682 | possibly damaging |
| C58 | 12 | 43769864  | 43769864  | A | C | 91  | 0.43 | <i>ADAMTS20</i> | NM_025003    | Missense    | p.F1770V | -1.97 | Neutral     | 0.44 | Tolerated | 0.005 | benign            |
| C58 | 14 | 64518809  | 64518809  | G | C | 252 | 0.47 | <i>SYNE2</i>    | NM_182914    | Missense    | p.Q2726H | -0.8  | Neutral     | 0.18 | Tolerated | 0.958 | probably damaging |
| C58 | 15 | 71184341  | 71184341  | G | A | 63  | 0.41 | <i>THAP10</i>   | NM_020147    | Missense    | p.R91W   | -1.23 | Neutral     | 0.18 | Tolerated | 0.999 | probably damaging |
| C58 | 16 | 2215893   | 2215893   | C | T | 114 | 0.43 | <i>TRAF7</i>    | NM_032271    | Missense    | p.T32M   | -0.91 | Neutral     | 0.03 | Damaging  | 0.997 | probably damaging |
| C58 | 16 | 84690558  | 84690558  | G | C | 110 | 0.38 | <i>KLHL36</i>   | NM_024731    | Missense    | p.V49L   | -1.51 | Neutral     | 0.16 | Tolerated | 0.792 | possibly damaging |
| C58 | 17 | 53398155  | 53398155  | G | A | 45  | 0.11 | <i>HLF</i>      | NM_002126    | Missense    | p.R268H  | -3.6  | Deleterious | 0.09 | Tolerated | 1     | probably damaging |
| C58 | 19 | 41800563  | 41800563  | G | C | 73  | 0.45 | <i>HNRNPUL1</i> | NM_007040    | Missense    | p.R497P  | -5.32 | Deleterious | 0    | Damaging  | 1     | probably damaging |
| C58 | 2  | 207631709 | 207631709 | C | G | 88  | 0.31 | <i>FASTKD2</i>  | NM_001136194 | Missense    | p.L98V   | 0.09  | Neutral     | 1    | Tolerated | 0.001 | benign            |
| C58 | 20 | 45354636  | 45354636  | G | A | 58  | 0.55 | <i>SLC2A10</i>  | NM_030777    | Missense    | p.V321M  | -0.51 | Neutral     | 0.2  | Tolerated | 0.586 | possibly damaging |
| C58 | 22 | 35947882  | 35947882  | C | T | 100 | 0.52 | <i>RASD2</i>    | NM_014310    | Missense    | p.R202C  | -6.2  | Deleterious | 0.01 | Damaging  | 0.916 | possibly damaging |
| C58 | 3  | 155210550 | 155210550 | G | T | 46  | 0.15 | <i>PLCH1</i>    | NM_001130960 | Missense    | p.P747T  | -7.43 | Deleterious | 0.02 | Damaging  | 1     | probably damaging |
| C58 | 5  | 162898274 | 162898274 | G | A | 92  | 0.39 | <i>HMMR</i>     | NM_001142556 | Missense    | p.M182I  | -1    | Neutral     | 0.21 | Tolerated | 0.865 | possibly damaging |
| C58 | 7  | 13935705  | 13935705  | C | T | 36  | 0.42 | <i>ETV1</i>     | NM_004956    | Missense    | p.G407E  | -7.63 | Deleterious | 0    | Damaging  | 1     | probably damaging |
| C58 | 8  | 77763763  | 77763763  | G | A | 171 | 0.45 | <i>ZFHX4</i>    | NM_024721    | Missense    | p.D1536N | -4.68 | Deleterious | 0.01 | Damaging  | 1     | probably damaging |
| C58 | 9  | 21971186  | 21971186  | G | A | 22  | 0.36 | <i>CDKN2A</i>   | NM_001195132 | nonsense    | p.R58_   | -4.7  | Deleterious | 0.01 | Damaging  | 0.824 | possibly damaging |
| C59 | 1  | 115258748 | 115258748 | C | A | 47  | 0.40 | <i>NRAS</i>     | NM_002524    | Missense    | p.G12C   | -7.09 | Deleterious | 0.01 | Damaging  | 0.675 | possibly damaging |
| C59 | 1  | 177911176 | 177911176 | C | T | 39  | 0.36 | <i>SEC16B</i>   | NM_033127    | Splice Site | p.V183sp | NA    | NA          | NA   | NA        | NA    | NA                |
| C59 | 11 | 100922187 | 100922187 | C | T | 35  | 0.37 | <i>PGR</i>      | NM_000926    | Missense    | p.M775I  | -2.77 | Deleterious | 0.47 | Tolerated | 0.885 | possibly damaging |

|     |    |           |           |   |         |     |      |                 |              |                 |              |        |             |      |           |       |                   |
|-----|----|-----------|-----------|---|---------|-----|------|-----------------|--------------|-----------------|--------------|--------|-------------|------|-----------|-------|-------------------|
| C59 | 11 | 55111475  | 55111475  | A | C       | 33  | 0.52 | <i>OR4A16</i>   | NM_001005274 | Missense        | p.K267Q      | -3.69  | Deleterious | 0    | Damaging  | 1     | probably damaging |
| C59 | 12 | 49439958  | 49439958  | C | A       | 101 | 0.47 | <i>MLL2</i>     | NM_003482    | Splice Site     | p.R1528sp    | NA     | NA          | NA   | NA        | NA    | NA                |
| C59 | 14 | 57268607  | 57268607  | G | T       | 88  | 0.30 | <i>OTX2</i>     | NM_001270525 | Missense        | p.S247Y      | -2.8   | Deleterious | 0.01 | Damaging  | 0.911 | possibly damaging |
| C59 | 14 | 60213121  | 60213121  | G | T       | 88  | 0.26 | <i>RTN1</i>     | NM_021136    | Missense        | p.S107Y      | -2.31  | Neutral     | 0.18 | Tolerated | 0.89  | possibly damaging |
| C59 | 16 | 22826263  | 22826263  | C | T       | 93  | 0.42 | <i>HS3ST2</i>   | NM_006043    | Missense        | p.T111I      | -2.72  | Deleterious | 0.1  | Tolerated | 0.157 | benign            |
| C59 | 19 | 5832454   | 5832454   | G | A       | 184 | 0.47 | <i>FUT6</i>     | NM_001040701 | Missense        | p.T42I       | -1     | Neutral     | 0.06 | Tolerated | 0.216 | benign            |
| C59 | 4  | 103718593 | 103718593 | C | T       | 33  | 0.33 | <i>UBE2D3</i>   | NM_181893    | nonsense        | p.W143_      | NA     | NA          | 1    | Tolerated | NA    | NA                |
| C59 | 4  | 148463742 | 148463742 | G | A       | 97  | 0.27 | <i>EDNRA</i>    | NM_001957    | Missense        | p.R419Q      | -1.59  | Neutral     | 0.05 | Damaging  | 0.614 | possibly damaging |
| C59 | 4  | 6051548   | 6051548   | C | T       | 178 | 0.20 | <i>JAKMIP1</i>  | NM_001099433 | Missense        | p.G654R      | -3.09  | Deleterious | 0.45 | Tolerated | 0.999 | probably damaging |
| C59 | 6  | 32497918  | 32497918  | C | G       | 27  | 0.15 | <i>HLA-DRB5</i> | NM_002125    | Missense        | p.L28F       | -1.12  | Neutral     | 0.04 | Damaging  | 0.999 | probably damaging |
| C59 | 7  | 91794338  | 91794338  | G | A       | 96  | 0.57 | <i>LRRD1</i>    | NM_001161528 | Missense        | p.P60L       | -2.06  | Neutral     | 0.01 | Damaging  | 0.829 | possibly damaging |
| C59 | 8  | 77763349  | 77763349  | C | T       | 184 | 0.40 | <i>ZFHX4</i>    | NM_024721    | Missense        | p.R1398C     | -7.21  | Deleterious | 0.05 | Damaging  | 1     | probably damaging |
| C61 | 13 | 28592639  | 28592639  | T | G       | 58  | 0.52 | <i>FLT3</i>     | NM_004119    | Missense        | p.I836L      | -1.83  | Neutral     | 0.01 | Damaging  | 0.13  | benign            |
| C61 | 1  | 2160695   | 2160695   | A | T       | 44  | 0.43 | <i>SKI</i>      | NM_003036    | Missense        | p.M164L      | -0.58  | Neutral     | 0.81 | Tolerated | 0     | benign            |
| C61 | 10 | 29776183  | 29776183  | G | A       | 49  | 0.57 | <i>SVIL</i>     | NM_021738    | Missense        | p.A1465V     | -2.93  | Deleterious | 0    | Damaging  | 0     | benign            |
| C61 | 13 | 28592641  | 28592641  | T | G       | 55  | 0.55 | <i>FLT3</i>     | NM_004119    | Missense        | p.D835A      | -7.25  | Deleterious | 0    | Damaging  | 1     | probably damaging |
| C61 | 2  | 25965112  | 25965112  | G | A       | 77  | 0.43 | <i>ASXL2</i>    | NM_018263    | Missense        | p.T1365I     | -2.16  | Neutral     | 0.13 | Tolerated | 1     | probably damaging |
| C61 | 3  | 195509747 | 195509747 | G | A       | 24  | 0.21 | <i>MUC4</i>     | NM_018406    | Missense        | p.L2902F     | -0.53  | Neutral     | NA   | NA        | 0.949 | possibly damaging |
| C61 | 3  | 196664445 | 196664445 | C | T       | 51  | 0.29 | <i>NCBP2</i>    | NM_007362    | Missense        | p.R112H      | -4.23  | Deleterious | 0.11 | Tolerated | 1     | probably damaging |
| C61 | 7  | 100491715 | 100491715 | G | A       | 26  | 0.50 | <i>ACHE</i>     | NM_015831    | Missense        | p.R47W       | -3.61  | Deleterious | 0.04 | Damaging  | 0.999 | probably damaging |
| C61 | 6  | 10410369  | 10410369  | A | ACC     | 59  | 0.25 | <i>TFAP2A</i>   | NM_003220    | Frame_Shift_Ins | p.L82fs      | NA     | NA          | NA   | NA        | NA    | NA                |
| C63 | 1  | 115258744 | 115258744 | C | T       | 55  | 0.33 | <i>NRAS</i>     | NM_002524    | Missense        | p.G13D       | -5.48  | Deleterious | 0.03 | Damaging  | 0.434 | benign            |
| C63 | 16 | 20476893  | 20476893  | G | T       | 64  | 0.25 | <i>ACSM2A</i>   | NM_001010845 | nonsense        | p.E78_       | NA     | NA          | 0.03 | Damaging  | NA    | NA                |
| C63 | 17 | 263253    | 263253    | C | A       | 22  | 0.09 | <i>C17orf97</i> | NM_001013672 | Missense        | p.P207T      | -1.97  | Neutral     | 0.47 | Tolerated | 0.001 | benign            |
| C63 | 9  | 33385815  | 33385815  | T | C       | 15  | 0.13 | <i>AQP7</i>     | NM_001170    | Missense        | p.Q192R      | -0.66  | Neutral     | 0.58 | Tolerated | 0.009 | benign            |
| C63 | 15 | 52017161  | 52017161  | G | GA      | 77  | 0.47 | <i>LYSMD2</i>   | NM_153374    | Frame_Shift_Ins | p.F143fs     | NA     | NA          | NA   | NA        | NA    | NA                |
|     |    |           |           |   | ACTGCCA |     |      |                 |              |                 |              |        |             |      |           |       |                   |
|     |    |           |           |   | CCCTCTG |     |      |                 |              |                 | p.173_174ins |        |             |      |           |       |                   |
| C63 | 2  | 228563910 | 228563934 | A | AAGGAC  | 123 | 0.14 | <i>SLC19A3</i>  | NM_025243    |                 | GGVLQRVA     | -15.58 | Deleterious | NA   | NA        | NA    | NA                |
|     |    |           |           |   | CCCGC   |     |      |                 |              | In_Frame_Ins    |              |        |             |      |           |       |                   |
| C64 | 11 | 77907300  | 77907300  | G | C       | 77  | 0.10 | <i>USP35</i>    | NM_020798    | Missense        | p.K3N        | -2.12  | Neutral     | 0    | Damaging  | 1     | probably damaging |
| C64 | 17 | 6023811   | 6023811   | G | A       | 97  | 0.38 | <i>WSCDI</i>    | NM_015253    | Missense        | p.V520M      | -2.22  | Neutral     | 0    | Damaging  | 1     | probably damaging |
| C64 | 18 | 58039300  | 58039300  | C | T       | 229 | 0.12 | <i>MC4R</i>     | NM_005912    | Missense        | p.V95I       | -0.39  | Neutral     | 0.2  | Tolerated | 0.873 | possibly damaging |

|     |    |           |           |            |    |     |      |                 |              |                 |              |       |             |      |           |       |                   |
|-----|----|-----------|-----------|------------|----|-----|------|-----------------|--------------|-----------------|--------------|-------|-------------|------|-----------|-------|-------------------|
| C64 | 3  | 195512734 | 195512734 | T          | G  | 21  | 0.10 | <i>MUC4</i>     | NM_018406    | Missense        | p.H1906P     | -0.4  | Neutral     | NA   | NA        | 0     | benign            |
| C64 | 6  | 144843201 | 144843201 | T          | G  | 23  | 0.48 | <i>UTRN</i>     | NM_007124    | Missense        | p.I1876S     | -2.6  | Deleterious | 0.07 | Tolerated | 0.995 | probably damaging |
| C64 | 7  | 158621950 | 158621950 | C          | A  | 16  | 0.13 | <i>ESYT2</i>    | NM_020728    | Missense        | p.G102C      | -7.68 | Deleterious | 0    | Damaging  | 1     | probably damaging |
| C64 | 8  | 13948115  | 13948115  | C          | A  | 16  | 0.13 | <i>SGCZ</i>     | NM_139167    | Missense        | p.G259V      | -0.81 | Neutral     | 0.16 | Tolerated | 1     | probably damaging |
| C64 | 9  | 14789063  | 14789063  | T          | C  | 56  | 0.30 | <i>FREMI</i>    | NM_144966    | Missense        | p.E1344G     | -3.92 | Deleterious | 0.13 | Tolerated | 0.002 | benign            |
| C64 | 5  | 26881534  | 26881534  | G          | T  | 181 | 0.39 | <i>CDH9</i>     | NM_016279    | Missense        | p.P694H      | -7.49 | Deleterious | NA   | NA        | 1     | probably damaging |
| C65 | 1  | 1225756   | 1225756   | C          | T  | 76  | 0.42 | <i>SCNN1D</i>   | NM_001130413 | Missense        | p.H590Y      | -4.58 | Deleterious | 0.33 | Tolerated | 0.967 | probably damaging |
| C65 | 1  | 145296448 | 145296448 | T          | A  | 12  | 0.25 | <i>NBPF10</i>   | NM_001039703 | Missense        | p.Y124N      | 1.63  | Neutral     | 1    | Tolerated | NA    | NA                |
| C65 | 1  | 184787942 | 184787942 | C          | T  | 36  | 0.47 | <i>FAM129A</i>  | NM_052966    | Missense        | p.A335T      | -3.28 | Deleterious | 0.18 | Tolerated | 0.999 | probably damaging |
| C65 | 1  | 196398790 | 196398790 | C          | T  | 147 | 0.42 | <i>KCNT2</i>    | NM_198503    | Missense        | p.G246R      | -7.82 | Deleterious | 0    | Damaging  | 1     | probably damaging |
| C65 | 10 | 73056447  | 73056447  | G          | A  | 53  | 0.38 | <i>UNC5B</i>    | NM_170744    | Missense        | p.R813Q      | -2.37 | Neutral     | 0.3  | Tolerated | 1     | probably damaging |
| C65 | 12 | 113624621 | 113624621 | G          | T  | 108 | 0.32 | <i>C12orf52</i> | NM_032848    | Missense        | p.G24C       | -3.16 | Deleterious | 0.06 | Tolerated | 0.921 | possibly damaging |
| C65 | 12 | 25398281  | 25398281  | C          | T  | 139 | 0.31 | <i>KRAS</i>     | NM_033360    | Missense        | p.G13D       | -5.4  | Deleterious | 0    | Damaging  | 0.803 | possibly damaging |
| C65 | 17 | 6909219   | 6909219   | C          | T  | 66  | 0.68 | <i>ALOX12</i>   | NM_000697    | Missense        | p.R431W      | -6.67 | Deleterious | 0    | Damaging  | 0.997 | probably damaging |
| C65 | 2  | 105858490 | 105858490 | G          | A  | 178 | 0.11 | <i>GPR45</i>    | NM_007227    | Missense        | p.V59M       | -1.81 | Neutral     | 0    | Damaging  | 1     | probably damaging |
| C65 | 2  | 188349537 | 188349537 | C          | T  | 62  | 0.31 | <i>TFPI</i>     | NM_006287    | Splice Site     | p.P179sp     | NA    | NA          | NA   | NA        | NA    | NA                |
| C65 | 7  | 88965742  | 88965742  | C          | A  | 123 | 0.35 | <i>ZNF804B</i>  | NM_181646    | Missense        | p.T1149K     | -3.46 | Deleterious | 0.04 | Damaging  | 1     | probably damaging |
| C65 | X  | 100297055 | 100297055 | G          | T  | 82  | 0.20 | <i>TRMT2B</i>   | NM_024917    | Missense        | p.P75Q       | -1.7  | Neutral     | 0.61 | Tolerated | 0.994 | probably damaging |
| C65 | X  | 54319385  | 54319385  | C          | T  | 285 | 0.22 | <i>WNK3</i>     | NM_020922    | Missense        | p.G658E      | -1.35 | Neutral     | 0.27 | Tolerated | 0.917 | possibly damaging |
| C65 | 4  | 88537504  | 88537504  | CAGCAATGAA | C  | 87  | 0.09 | <i>DSPP</i>     | NM_014208    | In_Frame_Del    | p.SNE1231del | -1.19 | Neutral     | NA   | NA        | NA    | NA                |
| C66 | 22 | 19967317  | 19967317  | C          | T  | 105 | 0.30 | <i>ARVCF</i>    | NM_001670    | Missense        | p.V449M      | -2.04 | Neutral     | NA   | NA        | 0.998 | probably damaging |
| C66 | 7  | 148080827 | 148080827 | G          | A  | 99  | 0.23 | <i>CNTNAP2</i>  | NM_014141    | Missense        | p.A1188T     | -1.99 | Neutral     | 0.49 | Tolerated | 0.954 | possibly damaging |
| C66 | 13 | 37678523  | 37678523  | G          | C  | 87  | 0.24 | <i>CSNK1A1L</i> | NM_145203    | Missense        | p.Q291E      | -1.76 | Neutral     | 0.06 | Tolerated | 0.035 | benign            |
| C66 | 19 | 47856948  | 47856948  | G          | A  | 36  | 0.08 | <i>DHX34</i>    | NM_014681    | Missense        | p.A221T      | -2.4  | Neutral     | 0    | Damaging  | 1     | probably damaging |
| C66 | 9  | 91727516  | 91727516  | C          | T  | 98  | 0.44 | <i>SHC3</i>     | NM_016848    | Missense        | p.R167H      | -2.85 | Deleterious | 0.02 | Damaging  | 1     | probably damaging |
| C66 | 19 | 7685860   | 7685860   | C          | T  | 36  | 0.31 | <i>XAB2</i>     | NM_020196    | Missense        | p.V615M      | -2.63 | Deleterious | 0    | Damaging  | 1     | probably damaging |
| C66 | 9  | 37002647  | 37002647  | T          | TG | 81  | 0.48 | <i>PAX5</i>     | NM_016734    | Frame_Shift_Ins | p.E201fs     | NA    | NA          | NA   | NA        | NA    | NA                |
| C67 | 2  | 71058242  | 71058242  | G          | A  | 63  | 0.19 | <i>CD207</i>    | NM_015717    | Missense        | p.A309V      | 0.51  | Neutral     | 0.57 | Tolerated | 0.149 | benign            |
| C67 | 9  | 99797098  | 99797098  | C          | T  | 108 | 0.52 | <i>CTSL2</i>    | NM_001333    | Missense        | p.S272N      | -1.47 | Neutral     | NA   | NA        | 0.087 | benign            |
| C67 | 10 | 134981802 | 134981802 | G          | A  | 144 | 0.40 | <i>KNDC1</i>    | NM_152643    | Missense        | p.G116R      | -6.32 | Deleterious | 0    | Damaging  | 1     | probably damaging |
| C67 | 5  | 140176747 | 140176747 | C          | T  | 89  | 0.34 | <i>PCDHA2</i>   | NM_018905    | Missense        | p.A733V      | -2.37 | Neutral     | 0.53 | Tolerated | 0.021 | benign            |
| C67 | 17 | 27284161  | 27284161  | G          | A  | 116 | 0.28 | <i>SEZ6</i>     | NM_178860    | Missense        | p.S865L      | -0.99 | Neutral     | 0.4  | Tolerated | 1     | probably damaging |
| C67 | 19 | 51220001  | 51220001  | C          | T  | 109 | 0.42 | <i>SHANK1</i>   | NM_016148    | Missense        | p.G59D       | -1.36 | Neutral     | 0.08 | Tolerated | 0.08  | benign            |

|     |    |           |           |   |   |     |      |                |              |             |          |       |             |      |           |       |                   |
|-----|----|-----------|-----------|---|---|-----|------|----------------|--------------|-------------|----------|-------|-------------|------|-----------|-------|-------------------|
| C67 | 3  | 140785272 | 140785272 | G | A | 63  | 0.56 | <i>SPSB4</i>   | NM_080862    | Missense    | p.R109H  | -4.96 | Deleterious | 0.45 | Tolerated | 1     | probably damaging |
| C67 | 10 | 123989930 | 123989930 | C | A | 106 | 0.22 | <i>TACC2</i>   | NM_206862    | Missense    | p.A2701D | -1.4  | Neutral     | 0.63 | Tolerated | 0.999 | probably damaging |
| C67 | 2  | 234680928 | 234680928 | G | A | 63  | 0.48 | <i>UGT1A5</i>  | NM_019078    | Missense    | p.R443H  | -2.83 | Deleterious | 0.08 | Tolerated | 0.235 | benign            |
| C68 | 1  | 77627075  | 77627075  | C | T | 40  | 0.30 | <i>PIGK</i>    | NM_005482    | Missense    | p.A240T  | -1.24 | Neutral     | 0.17 | Tolerated | 0.051 | benign            |
| C68 | 4  | 87724960  | 87724960  | C | T | 133 | 0.09 | <i>PTPN13</i>  | NM_080685    | nonsense    | p.R2207_ | NA    | NA          | 1    | Tolerated | NA    | NA                |
| C68 | X  | 84363866  | 84363866  | C | G | 118 | 0.33 | <i>SATL1</i>   | NM_001012980 | Missense    | p.G37R   | 0.84  | Neutral     | NA   | NA        | 0     | benign            |
| C69 | 1  | 118539004 | 118539004 | T | C | 122 | 0.52 | <i>SPAG17</i>  | NM_206996    | Missense    | p.Q1681R | -1.46 | Neutral     | 0.46 | Tolerated | 0.873 | possibly damaging |
| C69 | 1  | 154026844 | 154026844 | G | A | 123 | 0.47 | <i>NUP210L</i> | NM_207308    | Missense    | p.H1115Y | -1.02 | Neutral     | 1    | Tolerated | 0.993 | probably damaging |
| C69 | 1  | 177901659 | 177901659 | G | A | 82  | 0.51 | <i>SEC16B</i>  | NM_033127    | Missense    | p.A993V  | -1.39 | Neutral     | 0.26 | Tolerated | 0.196 | benign            |
| C69 | 1  | 215953355 | 215953355 | G | A | 40  | 0.43 | <i>USH2A</i>   | NM_206933    | Missense    | p.P3590L | -6.84 | Deleterious | 0    | Damaging  | 0.445 | benign            |
| C69 | 1  | 228468338 | 228468338 | C | T | 69  | 0.36 | <i>OBSCN</i>   | NM_001271223 | Missense    | p.R3109C | -3.19 | Deleterious | 0.18 | Tolerated | 0.511 | possibly damaging |
| C69 | 10 | 5791976   | 5791976   | T | G | 69  | 0.45 | <i>FAM208B</i> | NM_017782    | Missense    | p.F2198V | -3.33 | Deleterious | 0.03 | Damaging  | 0.972 | probably damaging |
| C69 | 11 | 59860317  | 59860317  | A | G | 47  | 0.51 | <i>MS4A2</i>   | NM_000139    | Missense    | p.Y125C  | -2.3  | Neutral     | 0.53 | Tolerated | 0.243 | benign            |
| C69 | 12 | 123344702 | 123344702 | G | A | 53  | 0.47 | <i>HIP1R</i>   | NM_003959    | Missense    | p.R835Q  | -1.31 | Neutral     | 0.53 | Tolerated | 0.865 | possibly damaging |
| C69 | 12 | 6715464   | 6715464   | T | C | 26  | 0.62 | <i>CHD4</i>    | NM_001273    | Missense    | p.N26D   | 0.39  | Neutral     | 0.13 | Tolerated | 0.593 | possibly damaging |
| C69 | 12 | 98926903  | 98926903  | A | G | 209 | 0.46 | <i>TMPO</i>    | NM_003276    | Missense    | p.K290E  | 0.18  | Neutral     | 0.47 | Tolerated | 0     | benign            |
| C69 | 14 | 64484470  | 64484470  | T | C | 37  | 0.43 | <i>SYNE2</i>   | NM_182914    | Missense    | p.L1682P | -4.26 | Deleterious | 0.01 | Damaging  | 1     | probably damaging |
| C69 | 15 | 55516177  | 55516177  | G | A | 117 | 0.46 | <i>RAB27A</i>  | NM_183234    | Missense    | p.P126L  | -8.04 | Deleterious | 0.03 | Damaging  | 1     | probably damaging |
| C69 | 17 | 18058025  | 18058025  | T | C | 27  | 0.37 | <i>MYO15A</i>  | NM_016239    | Missense    | p.L2727P | -5.22 | Deleterious | 0.03 | Damaging  | 0.989 | probably damaging |
| C69 | 2  | 11751118  | 11751118  | G | A | 30  | 0.30 | <i>GREB1</i>   | NM_014668    | Missense    | p.V99I   | 0.73  | Neutral     | 0.9  | Tolerated | 0     | benign            |
| C69 | 2  | 171225863 | 171225863 | A | T | 156 | 0.40 | <i>MYO3B</i>   | NM_138995    | Missense    | p.H316L  | -2.4  | Neutral     | 0.42 | Tolerated | 0.017 | benign            |
| C69 | 22 | 42473944  | 42473944  | C | G | 53  | 0.42 | <i>FAM109B</i> | NM_001002034 | Missense    | p.P216R  | -5.18 | Deleterious | 0.05 | Damaging  | 1     | probably damaging |
| C69 | 3  | 160138627 | 160138627 | G | C | 64  | 0.41 | <i>SMC4</i>    | NM_001002800 | Missense    | p.E653Q  | -0.11 | Neutral     | 0.6  | Tolerated | 0.013 | benign            |
| C69 | 3  | 195474138 | 195474138 | A | G | 156 | 0.22 | <i>MUC4</i>    | NM_018406    | Missense    | p.L5383P | -3.64 | Deleterious | 0    | Damaging  | 1     | probably damaging |
| C69 | 3  | 47163971  | 47163971  | T | G | 171 | 0.48 | <i>SETD2</i>   | NM_014159    | Missense    | p.N719H  | -1.45 | Neutral     | NA   | NA        | 0.998 | probably damaging |
| C69 | 4  | 119649805 | 119649805 | T | C | 65  | 0.45 | <i>SEC24D</i>  | NM_014822    | Missense    | p.T957A  | -1.94 | Neutral     | 0.48 | Tolerated | 0.156 | benign            |
| C69 | 4  | 48371900  | 48371900  | A | G | 125 | 0.44 | <i>SLAIN2</i>  | NM_020846    | Missense    | p.M142V  | -0.96 | Neutral     | 0.69 | Tolerated | 0     | benign            |
| C69 | 6  | 109480306 | 109480306 | G | A | 21  | 0.95 | <i>CEP57L1</i> | NM_001083535 | Splice Site | p.K274sp | 0.24  | Neutral     | NA   | NA        | NA    | NA                |
| C69 | 6  | 5368934   | 5368934   | A | G | 104 | 0.47 | <i>FARS2</i>   | NM_006567    | Missense    | p.Q44R   | -0.59 | Neutral     | 0.32 | Tolerated | 0     | benign            |
| C69 | 6  | 56765367  | 56765367  | G | A | 87  | 0.44 | <i>DST</i>     | NM_001144769 | Missense    | p.A90V   | -0.28 | Neutral     | 0.05 | Damaging  | 0.001 | benign            |
| C69 | 7  | 128492992 | 128492992 | G | A | 54  | 0.52 | <i>FLNC</i>    | NM_001458    | Missense    | p.G2039R | -7.52 | Deleterious | 0    | Damaging  | 1     | probably damaging |
| C69 | 7  | 157370775 | 157370775 | C | T | 50  | 0.36 | <i>PTPRN2</i>  | NM_002847    | Missense    | p.G852S  | -5.74 | Deleterious | 0.07 | Tolerated | 1     | probably damaging |
| C69 | 9  | 127088681 | 127088681 | G | A | 130 | 0.44 | <i>NEK6</i>    | NM_001145001 | Missense    | p.V194M  | -0.05 | Neutral     | 0.05 | Damaging  | 0.992 | probably damaging |



|     |    |           |           |     |             |     |      |                 |              |                 |                    |        |             |      |           |       |                   |
|-----|----|-----------|-----------|-----|-------------|-----|------|-----------------|--------------|-----------------|--------------------|--------|-------------|------|-----------|-------|-------------------|
| C70 | 3  | 156742576 | 156742576 | G   | A           | 48  | 0.44 | <i>LEKRI</i>    | NM_001004316 | Missense        | p.A411T            | -0.78  | Neutral     | 0.54 | Tolerated | 0.996 | probably damaging |
| C70 | 4  | 123108615 | 123108615 | C   | G           | 39  | 0.38 | <i>KIAA1109</i> | NM_015312    | Missense        | p.P192R            | -1.22  | Neutral     | 0.72 | Tolerated | 0.535 | possibly damaging |
| C70 | 5  | 73236833  | 73236833  | C   | T           | 127 | 0.50 | <i>ARHGEF28</i> | NM_001080479 | Missense        | p.L1731F           | 0.09   | Neutral     | 0    | Damaging  | 1     | probably damaging |
| C70 | 6  | 132030966 | 132030966 | G   | C           | 24  | 1.00 | <i>CTAGE9</i>   | NM_001145659 | Missense        | p.L398V            | -2.48  | Neutral     | 0    | Damaging  | 0.999 | probably damaging |
| C70 | 6  | 169642053 | 169642053 | G   | A           | 51  | 0.53 | <i>THBS2</i>    | NM_003247    | Missense        | p.A232V            | -0.4   | Neutral     | 0.62 | Tolerated | 0     | benign            |
| C70 | 6  | 37139063  | 37139063  | G   | A           | 150 | 0.50 | <i>PIMI</i>     | NM_001243186 | Missense        | p.E226K            | -3.87  | Deleterious | 0.01 | Damaging  | 0.08  | benign            |
| C70 | 7  | 116339770 | 116339770 | T   | G           | 181 | 0.48 | <i>MET</i>      | NM_001127500 | Missense        | p.L211W            | -1.86  | Neutral     | 0.03 | Damaging  | 1     | probably damaging |
| C70 | 7  | 91774219  | 91774219  | G   | A           | 48  | 0.44 | <i>LRRD1</i>    | NM_001161528 | Missense        | p.R856C            | -1.57  | Neutral     | 0.12 | Tolerated | 0.001 | benign            |
| C70 | 7  | 91793095  | 91793095  | G   | T           | 43  | 0.37 | <i>LRRD1</i>    | NM_001161528 | Missense        | p.N474K            | -5.14  | Deleterious | 0.01 | Damaging  | 1     | probably damaging |
| C70 | 8  | 9610060   | 9610060   | G   | T           | 31  | 0.55 | <i>TNKS</i>     | NM_003747    | Missense        | p.G1026V           | -1.01  | Neutral     | 0.06 | Tolerated | 0.001 | benign            |
| C70 | 9  | 115336773 | 115336773 | A   | T           | 162 | 0.46 | <i>KIAA1958</i> | NM_133465    | Missense        | p.Y138F            | -0.46  | Neutral     | 0.25 | Tolerated | 0.997 | probably damaging |
| C70 | 9  | 14816816  | 14816816  | G   | A           | 144 | 0.80 | <i>FREMI</i>    | NM_144966    | Missense        | p.T867I            | -4.35  | Deleterious | 0    | Damaging  | 1     | probably damaging |
| C70 | 9  | 34977120  | 34977120  | G   | A           | 57  | 0.53 | <i>KIAA1045</i> | NM_015297    | Missense        | p.R297Q            | -1.63  | Neutral     | 0.02 | Damaging  | 1     | probably damaging |
| C70 | X  | 3241940   | 3241940   | T   | C           | 32  | 0.97 | <i>MXRA5</i>    | NM_015419    | Missense        | p.T596A            | -1.18  | Neutral     | 0.82 | Tolerated | 0.002 | benign            |
| C70 | 11 | 6662745   | 6662745   | C   | CCAG        | 28  | 0.21 | <i>DCHS1</i>    | NM_003737    | In_Frame_Ins    | p.33_34insL        | -0.08  | Neutral     | NA   | NA        | NA    | NA                |
| C70 | 12 | 50749738  | 50749738  | CAT | C           | 132 | 0.38 | <i>FAM186A</i>  | NM_001145475 | Frame_Shift_Del | p.H292fs           | NA     | NA          | NA   | NA        | NA    | NA                |
| C70 | 9  | 100092968 | 100092968 | A   | AGAGGA<br>G | 36  | 0.25 | <i>CCDC180</i>  | NM_020893    | In_Frame_Ins    | p.915_915E>E<br>EE | 0.28   | Neutral     | NA   | NA        | NA    | NA                |
| C70 | X  | 41204685  | 41204685  | A   | ACC         | 21  | 0.90 | <i>DDX3X</i>    | NM_001356    | Frame_Shift_Ins | p.I401fs           | NA     | NA          | NA   | NA        | NA    | NA                |
| C71 | 1  | 176998832 | 176998832 | G   | A           | 62  | 0.48 | <i>ASTN1</i>    | NM_004319    | Missense        | p.A353V            | -1.33  | Neutral     | 0.02 | Damaging  | 0.073 | benign            |
| C71 | 1  | 181701989 | 181701989 | C   | T           | 100 | 0.41 | <i>CACNA1E</i>  | NM_001205293 | Missense        | p.H923Y            | -2.58  | Deleterious | 0.23 | Tolerated | 0.957 | probably damaging |
| C71 | 1  | 215990508 | 215990508 | C   | T           | 80  | 0.53 | <i>USH2A</i>    | NM_206933    | Missense        | p.R3134Q           | -0.9   | Neutral     | 0.59 | Tolerated | 0.453 | possibly damaging |
| C71 | 1  | 39788353  | 39788353  | G   | A           | 45  | 0.51 | <i>MACF1</i>    | NM_012090    | Missense        | p.R1373H           | -4.38  | Deleterious | 0.01 | Damaging  | 1     | probably damaging |
| C71 | 10 | 29779847  | 29779847  | A   | C           | 154 | 0.14 | <i>SVIL</i>     | NM_021738    | Missense        | p.L1374R           | -4.99  | Deleterious | 0    | Damaging  | 0.991 | probably damaging |
| C71 | 10 | 64968527  | 64968527  | G   | A           | 68  | 0.63 | <i>JMJD1C</i>   | NM_032776    | Missense        | p.R968W            | -2.58  | Deleterious | 0    | Damaging  | 1     | probably damaging |
| C71 | 10 | 79581223  | 79581223  | C   | T           | 88  | 0.66 | <i>DLG5</i>     | NM_004747    | Missense        | p.A1007T           | 0.52   | Neutral     | 0.43 | Tolerated | 0.026 | benign            |
| C71 | 11 | 22284493  | 22284493  | G   | T           | 148 | 0.44 | <i>ANO5</i>     | NM_213599    | Missense        | p.C601F            | -10.68 | Deleterious | 0.03 | Damaging  | 1     | probably damaging |
| C71 | 11 | 60696170  | 60696170  | C   | T           | 29  | 0.59 | <i>TMEM132A</i> | NM_017870    | Missense        | p.R202W            | -3.15  | Deleterious | 0    | Damaging  | 1     | probably damaging |
| C71 | 11 | 92623734  | 92623734  | C   | T           | 16  | 0.38 | <i>FAT3</i>     | NM_001008781 | nonsense        | p.Q4377_           | NA     | NA          | 0.07 | Tolerated | NA    | NA                |
| C71 | 11 | 9286541   | 9286541   | T   | C           | 32  | 0.50 | <i>DENND5A</i>  | NM_015213    | Missense        | p.T26A             | -0.48  | Neutral     | 0.77 | Tolerated | 0     | benign            |
| C71 | 11 | 94759620  | 94759620  | A   | T           | 72  | 0.44 | <i>KDM4E</i>    | NM_001161630 | Missense        | p.Y300F            | -3.87  | Deleterious | 0.13 | Tolerated | 0.998 | probably damaging |
| C71 | 12 | 133067343 | 133067343 | A   | G           | 29  | 1.00 | <i>FBRSL1</i>   | NM_001142641 | Missense        | p.T63A             | 0.5    | Neutral     | 1    | Tolerated | 0     | benign            |
| C71 | 12 | 6680061   | 6680061   | G   | A           | 43  | 0.44 | <i>CHD4</i>     | NM_001273    | Missense        | p.R1899W           | -4.51  | Deleterious | 0    | Damaging  | 1     | probably damaging |

|     |    |           |           |   |             |     |      |                |              |                 |                  |       |             |      |           |       |                   |
|-----|----|-----------|-----------|---|-------------|-----|------|----------------|--------------|-----------------|------------------|-------|-------------|------|-----------|-------|-------------------|
| C71 | 13 | 28608285  | 28608285  | A | C           | 58  | 0.36 | <i>FLT3</i>    | NM_004119    | Missense        | p.Y591D          | -8.42 | Deleterious | 0.04 | Damaging  | 1     | probably damaging |
| C71 | 14 | 104642408 | 104642408 | C | G           | 158 | 0.47 | <i>KIF26A</i>  | NM_015656    | Missense        | p.P1095A         | -1.55 | Neutral     | 0.58 | Tolerated | 0.001 | benign            |
| C71 | 14 | 105353935 | 105353935 | C | G           | 78  | 0.49 | <i>CEP170B</i> | NM_001112726 | Missense        | p.P1120R         | -7.96 | Deleterious | 0    | Damaging  | 0.999 | probably damaging |
| C71 | 14 | 105413921 | 105413921 | C | T           | 100 | 0.51 | <i>AHNAK2</i>  | NM_138420    | Missense        | p.A2623T         | -1.55 | Neutral     | 0.29 | Tolerated | 0.718 | possibly damaging |
| C71 | 15 | 77329487  | 77329487  | C | A           | 37  | 0.46 | <i>PSTPIP1</i> | NM_003978    | Missense        | p.F407L          | -0.28 | Neutral     | 1    | Tolerated | 0.013 | benign            |
| C71 | 16 | 20944655  | 20944655  | T | C           | 39  | 0.46 | <i>DNAH3</i>   | NM_017539    | Missense        | p.M4058V         | -0.6  | Neutral     | 0.14 | Tolerated | 0.003 | benign            |
| C71 | 16 | 71007809  | 71007809  | C | T           | 118 | 0.29 | <i>HYDIN</i>   | NM_001270974 | Missense        | p.V1718M         | -2.05 | Neutral     | 0.02 | Damaging  | 0.383 | benign            |
| C71 | 16 | 87748173  | 87748173  | T | G           | 39  | 0.51 | <i>KLHDC4</i>  | NM_017566    | Missense        | p.K256Q          | -3.52 | Deleterious | 0.16 | Tolerated | 0.995 | probably damaging |
| C71 | 17 | 53398202  | 53398202  | A | G           | 22  | 0.55 | <i>HLF</i>     | NM_002126    | Missense        | p.I284V          | -0.14 | Neutral     | 0.55 | Tolerated | 0.01  | benign            |
| C71 | 18 | 19057136  | 19057136  | G | C           | 78  | 0.59 | <i>GREB1L</i>  | NM_001142966 | Missense        | p.G792A          | -2.01 | Neutral     | 0.13 | Tolerated | 0.357 | benign            |
| C71 | 2  | 170094614 | 170094614 | G | A           | 73  | 0.51 | <i>LRP2</i>    | NM_004525    | Missense        | p.T1498M         | -3.61 | Deleterious | 0.19 | Tolerated | 1     | probably damaging |
| C71 | 2  | 186661506 | 186661506 | G | A           | 118 | 0.51 | <i>FSIP2</i>   | NM_173651    | Missense        | p.E3304K         | -3    | Deleterious | 0.17 | Tolerated | NA    | NA                |
| C71 | 2  | 32750579  | 32750579  | C | T           | 47  | 0.30 | <i>BIRC6</i>   | NM_016252    | Missense        | p.P3935L         | -4.15 | Deleterious | 0    | Damaging  | 1     | probably damaging |
| C71 | 22 | 32992709  | 32992709  | T | G           | 47  | 0.51 | <i>SYN3</i>    | NM_003490    | Missense        | p.H242P          | -0.83 | Neutral     | 0.25 | Tolerated | 0.025 | benign            |
| C71 | 22 | 46785367  | 46785367  | C | G           | 63  | 0.41 | <i>CELSR1</i>  | NM_014246    | Missense        | p.Q2125H         | -1.6  | Neutral     | 0.12 | Tolerated | 0.941 | possibly damaging |
| C71 | 3  | 194081166 | 194081166 | G | A           | 108 | 0.47 | <i>LRRC15</i>  | NM_001135057 | Missense        | p.R209W          | -2.08 | Neutral     | 0.18 | Tolerated | 1     | probably damaging |
| C71 | 3  | 37360684  | 37360684  | T | C           | 70  | 0.47 | <i>GOLGA4</i>  | NM_001172713 | Missense        | p.L537P          | -4.07 | Deleterious | 0.28 | Tolerated | 1     | probably damaging |
| C71 | 4  | 954436    | 954436    | G | A           | 57  | 0.65 | <i>DGKQ</i>    | NM_001347    | Missense        | p.A934V          | 0.17  | Neutral     | 0.73 | Tolerated | 0.001 | benign            |
| C71 | 6  | 38545467  | 38545467  | T | C           | 90  | 0.51 | <i>BTBD9</i>   | NM_052893    | Missense        | p.M355V          | -1.92 | Neutral     | 0.67 | Tolerated | 0.843 | possibly damaging |
| C71 | 6  | 38913338  | 38913338  | C | T           | 94  | 0.51 | <i>DNAH8</i>   | NM_001206927 | Missense        | p.P4035S         | -3.36 | Deleterious | 0.29 | Tolerated | 0.099 | benign            |
| C71 | 7  | 73646449  | 73646449  | G | A           | 42  | 0.45 | <i>RFC2</i>    | NM_181471    | Missense        | p.P351L          | -2.07 | Neutral     | 0.33 | Tolerated | 0.333 | benign            |
| C71 | 7  | 82785661  | 82785661  | G | A           | 102 | 0.58 | <i>PCLO</i>    | NM_033026    | Missense        | p.P99L           | -3.8  | Deleterious | 0    | Damaging  | 0.069 | benign            |
| C71 | 8  | 145106273 | 145106273 | T | A           | 53  | 0.62 | <i>OPLAH</i>   | NM_017570    | Missense        | p.E1274V         | NA    | NA          | 0.24 | Tolerated | 0.981 | probably damaging |
| C71 | 8  | 77766676  | 77766676  | C | T           | 81  | 0.54 | <i>ZFHX4</i>   | NM_024721    | Missense        | p.L2507F         | -2.28 | Neutral     | 0.06 | Tolerated | 0.997 | probably damaging |
| C71 | 9  | 133943614 | 133943614 | C | T           | 28  | 0.61 | <i>LAMC3</i>   | NM_006059    | Missense        | p.R915W          | -2.71 | Deleterious | 0.01 | Damaging  | 0.994 | probably damaging |
| C71 | X  | 153595109 | 153595109 | G | T           | 209 | 0.45 | <i>FLNA</i>    | NM_001110556 | Missense        | p.H326Q          | -4.24 | Deleterious | 0.11 | Tolerated | 0.06  | benign            |
| C71 | 4  | 76797511  | 76797511  | A | AG          | 30  | 0.80 | <i>PPEF2</i>   | NM_006239    | Frame_Shift_Ins | p.S417fs         | NA    | NA          | NA   | NA        | NA    | NA                |
| C71 | 6  | 34857302  | 34857302  | G | GGGCGG<br>C | 21  | 0.29 | <i>ANKS1A</i>  | NM_015245    | In_Frame_Ins    | p.42_42G>GG<br>G | -0.63 | Neutral     | NA   | NA        | NA    | NA                |
| C71 | X  | 84362472  | 84362472  | C | CA          | 179 | 0.69 | <i>SATL1</i>   | NM_001012980 | Frame_Shift_Ins | p.L314fs         | NA    | NA          | NA   | NA        | NA    | NA                |
| C72 | 4  | 177067156 | 177067156 | G | T           | 147 | 0.24 | <i>WDR17</i>   | NM_170710    | Missense        | p.A538S          | -2.15 | Neutral     | 0    | Damaging  | 1     | probably damaging |
| C72 | 4  | 187541622 | 187541622 | C | T           | 56  | 0.34 | <i>FAT1</i>    | NM_005245    | Missense        | p.D2040N         | -4.91 | Deleterious | 0.03 | Damaging  | 1     | probably damaging |
| C72 | 2  | 50170907  | 50170907  | G | T           | 36  | 0.47 | <i>NRXN1</i>   | NM_001135659 | Missense        | p.A1424D         | -2.9  | Deleterious | 0.03 | Damaging  | 1     | probably damaging |



|     |    |           |           |   |   |     |      |                 |              |          |          |       |             |      |           |       |                   |
|-----|----|-----------|-----------|---|---|-----|------|-----------------|--------------|----------|----------|-------|-------------|------|-----------|-------|-------------------|
| C72 | 12 | 69103871  | 69103871  | T | A | 23  | 0.09 | <i>NUP107</i>   | NM_020401    | nonsense | p.Y296_  | NA    | NA          | NA   | NA        | NA    | NA                |
| C72 | 1  | 214171319 | 214171319 | C | T | 51  | 0.37 | <i>PROX1</i>    | NM_001270616 | Missense | p.R481C  | -2.18 | Neutral     | 0.03 | Damaging  | 1     | probably damaging |
| C72 | 19 | 47944662  | 47944662  | T | C | 22  | 0.27 | <i>SLC8A2</i>   | NM_015063    | Missense | p.E600G  | -4.82 | Deleterious | 0    | Damaging  | 0.999 | probably damaging |
| C72 | 5  | 101593662 | 101593662 | C | T | 18  | 0.28 | <i>SLCO4C1</i>  | NM_180991    | Missense | p.A420T  | -3.25 | Deleterious | 0.03 | Damaging  | 0.974 | probably damaging |
| C72 | 2  | 241991826 | 241991826 | G | A | 34  | 0.44 | <i>SNED1</i>    | NM_001080437 | Missense | p.R675Q  | -0.1  | Neutral     | 0.59 | Tolerated | 0.785 | possibly damaging |
| C72 | 1  | 202573665 | 202573665 | C | T | 46  | 0.48 | <i>SYT2</i>     | NM_001136504 | Missense | p.C88Y   | -1.78 | Neutral     | 0.74 | Tolerated | 0.995 | probably damaging |
| C73 | 1  | 180853153 | 180853153 | G | T | 224 | 0.65 | <i>XPR1</i>     | NM_004736    | Missense | p.R681L  | -0.72 | Neutral     | 0.11 | Tolerated | 0.004 | benign            |
| C73 | 17 | 39240795  | 39240795  | A | T | 23  | 0.17 | <i>KRTAP4-7</i> | NM_033061    | Missense | p.S113C  | -3.33 | Deleterious | 0.05 | Damaging  | 0.002 | benign            |
| C73 | 17 | 45663749  | 45663749  | G | A | 71  | 0.10 | <i>NPEPPS</i>   | NM_006310    | Missense | p.G322D  | -6.19 | Deleterious | 0    | Damaging  | 0.998 | probably damaging |
| C73 | 19 | 45404331  | 45404331  | C | A | 37  | 0.08 | <i>TOMM40</i>   | NM_001128917 | Missense | p.H271Q  | -7.04 | Deleterious | 0.03 | Damaging  | 0.808 | possibly damaging |
| C74 | 10 | 61868693  | 61868693  | C | T | 88  | 0.23 | <i>ANK3</i>     | NM_020987    | Missense | p.R1023H | -4.83 | Deleterious | 0    | Damaging  | 1     | probably damaging |
| C74 | 20 | 42814983  | 42814983  | C | A | 45  | 0.09 | <i>JPH2</i>     | NM_020433    | Missense | p.E121D  | -2.57 | Deleterious | 0.11 | Tolerated | 1     | probably damaging |
| C74 | X  | 24024195  | 24024195  | G | A | 83  | 0.23 | <i>KLHL15</i>   | NM_030624    | Missense | p.R206W  | -2.32 | Neutral     | 0    | Damaging  | 0.999 | probably damaging |
| C74 | 17 | 18023904  | 18023904  | C | T | 72  | 0.26 | <i>MYO15A</i>   | NM_016239    | Missense | p.A597V  | -0.84 | Neutral     | 0.24 | Tolerated | 0.001 | benign            |
| C74 | 15 | 56435072  | 56435072  | C | T | 100 | 0.45 | <i>RFX7</i>     | NM_022841    | Missense | p.R102Q  | -1.91 | Neutral     | 0.01 | Damaging  | 1     | probably damaging |
| C74 | 1  | 1007475   | 1007475   | C | T | 64  | 0.42 | <i>RNF223</i>   | NM_001205252 | Missense | p.V158I  | 0     | Neutral     | 0.45 | Tolerated | NA    | NA                |
| C75 | 19 | 20727673  | 20727673  | T | C | 65  | 0.11 | <i>ZNF737</i>   | NM_001159293 | Missense | p.I446V  | -0.81 | Neutral     | 0.07 | Tolerated | 0.325 | benign            |
| C75 | 19 | 13873847  | 13873847  | C | A | 16  | 0.25 | <i>CCDC130</i>  | NM_030818    | Missense | p.L386I  | -0.92 | Neutral     | 0.01 | Damaging  | 1     | probably damaging |
| C75 | 16 | 75327887  | 75327887  | A | G | 123 | 0.13 | <i>CFDP1</i>    | NM_006324    | Missense | p.I288T  | -3.08 | Deleterious | 0.58 | Tolerated | 0.955 | possibly damaging |
| C75 | 7  | 27170313  | 27170313  | C | T | 93  | 0.24 | <i>HOXA4</i>    | NM_002141    | Missense | p.E14K   | -2.58 | Deleterious | 0.01 | Damaging  | 0.999 | probably damaging |
| C75 | X  | 86773055  | 86773055  | G | C | 44  | 0.14 | <i>KLHL4</i>    | NM_057162    | Missense | p.K53N   | -0.56 | Neutral     | 0.08 | Tolerated | 0     | benign            |
| C75 | 18 | 21338406  | 21338406  | C | A | 22  | 0.18 | <i>LAMA3</i>    | NM_198129    | Missense | p.R332S  | -3.63 | Deleterious | 0.05 | Damaging  | 0.937 | possibly damaging |
| C75 | 15 | 66274815  | 66274815  | C | A | 22  | 0.18 | <i>MEGF11</i>   | NM_032445    | Missense | p.D136Y  | -2.63 | Deleterious | 0.01 | Damaging  | 0.999 | probably damaging |
| C75 | X  | 110406143 | 110406143 | A | G | 49  | 0.35 | <i>PAK3</i>     | NM_001128168 | Missense | p.S193G  | -1.04 | Neutral     | NA   | NA        | 0     | benign            |
| C75 | 22 | 33402569  | 33402569  | G | A | 52  | 0.25 | <i>SYN3</i>     | NM_003490    | Missense | p.R27C   | -4.49 | Deleterious | 0    | Damaging  | 1     | probably damaging |
| C75 | 12 | 109490560 | 109490560 | C | A | 16  | 0.19 | <i>USP30</i>    | NM_032663    | Missense | p.A26D   | -0.82 | Neutral     | 0.26 | Tolerated | 0.079 | benign            |
| C76 | 2  | 242757730 | 242757730 | G | A | 48  | 0.35 | <i>NEU4</i>     | NM_001167599 | Missense | p.E284K  | -4    | Deleterious | 0.01 | Damaging  | 1     | probably damaging |
| C76 | 6  | 72892042  | 72892042  | C | T | 45  | 0.16 | <i>RIMS1</i>    | NM_014989    | Missense | p.R290W  | -3.83 | Deleterious | 0.01 | Damaging  | 1     | probably damaging |
| C76 | 14 | 21359943  | 21359943  | C | T | 113 | 0.22 | <i>RNASE3</i>   | NM_002935    | Missense | p.T33M   | -4.33 | Deleterious | 0    | Damaging  | 1     | probably damaging |
| C76 | 4  | 77662502  | 77662502  | G | A | 57  | 0.37 | <i>SHROOM3</i>  | NM_020859    | Missense | p.R1059H | -2.86 | Deleterious | 0.01 | Damaging  | 1     | probably damaging |
| C76 | 11 | 44958419  | 44958419  | G | A | 20  | 0.25 | <i>TP53I11</i>  | NM_001258320 | Missense | p.A90V   | -0.85 | Neutral     | 0.93 | Tolerated | 0.001 | benign            |
| C76 | 4  | 68506879  | 68506879  | T | C | 63  | 0.10 | <i>UBA6</i>     | NM_018227    | Missense | p.H515R  | -2.67 | Deleterious | 0.52 | Tolerated | 0     | benign            |
| C76 | 19 | 11833222  | 11833222  | C | T | 105 | 0.15 | <i>ZNF823</i>   | NM_001080493 | Missense | p.R376Q  | -1.38 | Neutral     | 0.72 | Tolerated | 0.987 | probably damaging |

|     |    |           |           |   |                         |     |      |                |              |                 |                         |        |             |      |           |       |                   |
|-----|----|-----------|-----------|---|-------------------------|-----|------|----------------|--------------|-----------------|-------------------------|--------|-------------|------|-----------|-------|-------------------|
| C77 | 13 | 25021323  | 25021323  | A | G                       | 19  | 0.21 | <i>PARP4</i>   | NM_006437    | Missense        | p.H1039T                | -3.94  | Deleterious | 0.01 | Damaging  | 0.856 | possibly damaging |
| C77 | 7  | 140453987 | 140453987 | T | A                       | 102 | 0.52 | <i>BRAF</i>    | NM_004333    | Missense        | p.N581Y                 | -6.88  | Deleterious | NA   | NA        | 1     | probably damaging |
| C77 | 4  | 74702556  | 74702556  | C | T                       | 70  | 0.23 | <i>CXCL6</i>   | NM_002993    | Missense        | p.P30L                  | -1.23  | Neutral     | 0.5  | Tolerated | 0.007 | benign            |
| C77 | 6  | 50011374  | 50011374  | C | A                       | 117 | 0.25 | <i>DEFB112</i> | NM_001037498 | nonsense        | p.E86_                  | NA     | NA          | 0.11 | Tolerated | NA    | NA                |
| C77 | 3  | 57616442  | 57616442  | C | T                       | 73  | 0.40 | <i>DENND6A</i> | NM_152678    | Missense        | p.R506Q                 | -3.1   | Deleterious | NA   | NA        | 0.999 | probably damaging |
| C77 | 16 | 26147117  | 26147117  | G | A                       | 93  | 0.46 | <i>HS3ST4</i>  | NM_006040    | Missense        | p.E307K                 | -2.67  | Deleterious | 0.21 | Tolerated | 0.998 | probably damaging |
| C77 | 16 | 71103195  | 71103195  | C | T                       | 160 | 0.21 | <i>HYDIN</i>   | NM_001270974 | Missense        | p.R650H                 | -2.48  | Neutral     | 0.13 | Tolerated | 1     | probably damaging |
| C77 | 5  | 78610246  | 78610246  | G | A                       | 98  | 0.53 | <i>JMY</i>     | NM_152405    | Missense        | p.R744H                 | -0.16  | Neutral     | 0.17 | Tolerated | 0.688 | possibly damaging |
| C77 | 12 | 21799857  | 21799857  | T | A                       | 80  | 0.09 | <i>LDHB</i>    | NM_001174097 | Missense        | p.T75S                  | -2.09  | Neutral     | 0.24 | Tolerated | 0.79  | possibly damaging |
| C77 | 20 | 33570341  | 33570341  | G | A                       | 75  | 0.28 | <i>MYH7B</i>   | NM_020884    | Missense        | p.G245R                 | 0.47   | Neutral     | 0.58 | Tolerated | 0.91  | possibly damaging |
| C77 | 17 | 29664869  | 29664869  | G | A                       | 106 | 0.27 | <i>NF1</i>     | NM_001042492 | nonsense        | p.W2225_                | NA     | NA          | 0.02 | Damaging  | NA    | NA                |
| C77 | 11 | 4566923   | 4566923   | G | A                       | 108 | 0.22 | <i>OR52M1</i>  | NM_001004137 | Missense        | p.R168Q                 | -1.86  | Neutral     | 0.08 | Tolerated | 0.692 | possibly damaging |
| C77 | 13 | 46287368  | 46287368  | C | T                       | 116 | 0.49 | <i>SPERT</i>   | NM_152719    | Missense        | p.R70C                  | -1.58  | Neutral     | 0    | Damaging  | 0.999 | probably damaging |
| C77 | 19 | 41081429  | 41081429  | C | A                       | 38  | 0.58 | <i>SPTBN4</i>  | NM_020971    | Missense        | p.P2550H                | -2.67  | Deleterious | 0.01 | Damaging  | 0.952 | possibly damaging |
| C77 | 12 | 58120415  | 58120415  | T | TGCTGGGCGT<br>GGTGGCCGC | 31  | 0.29 | <i>AGAP2</i>   | NM_001122772 | In_Frame_Del    | p.AATTPS116<br>1del     | -1.69  | Neutral     | NA   | NA        | NA    | NA                |
| C77 | 17 | 54672052  | 54672052  | C | CG<br>TCCCCCA           | 148 | 0.43 | <i>NOG</i>     | NM_005450    | Frame_Shift_Ins | p.P156fs                | NA     | NA          | NA   | NA        | NA    | NA                |
| C77 | 5  | 98228230  | 98228230  | T | CA<br>ACCA              | 99  | 0.30 | <i>CHD1</i>    | NM_001270    | Splice Site     | p.726_727YK<br>>YWLW GK | -11.97 | Deleterious | NA   | NA        | NA    | NA                |
| C78 | 3  | 75715099  | 75715099  | T | A                       | 17  | 0.24 | <i>FRG2C</i>   | NM_001124759 | Missense        | p.D252E                 | -0.31  | Neutral     | 1    | Tolerated | 0     | benign            |
| C78 | 17 | 42152054  | 42152054  | C | T                       | 64  | 0.17 | <i>G6PC3</i>   | NM_138387    | Missense        | p.P111L                 | -9.53  | Deleterious | 0    | Damaging  | 1     | probably damaging |
| C78 | 18 | 14542791  | 14542791  | C | T                       | 22  | 0.27 | <i>POTEC</i>   | NM_001137671 | Missense        | p.A119T                 | -0.93  | Neutral     | 0.4  | Tolerated | 0.005 | benign            |
| C78 | 8  | 113668566 | 113668566 | G | A                       | 60  | 0.15 | <i>CSMD3</i>   | NM_198123    | nonsense        | p.Q941_                 | NA     | NA          | 0.78 | Tolerated | NA    | NA                |
| C78 | 7  | 55210046  | 55210046  | G | C                       | 112 | 0.11 | <i>EGFR</i>    | NM_005228    | Missense        | p.Q52H                  | -1.23  | Neutral     | 0.07 | Tolerated | 0.998 | probably damaging |
| C78 | 5  | 73931322  | 73931322  | C | G                       | 84  | 0.12 | <i>ENC1</i>    | NM_003633    | Missense        | p.R330T                 | -0.77  | Neutral     | 0    | Damaging  | 0.987 | probably damaging |
| C78 | 17 | 42155773  | 42155773  | C | A                       | 40  | 0.13 | <i>HDAC5</i>   | NM_001015053 | nonsense        | p.E1115_                | NA     | NA          | 0    | Damaging  | NA    | NA                |
| C78 | 9  | 138903486 | 138903486 | G | A                       | 79  | 0.48 | <i>NACC2</i>   | NM_144653    | Missense        | p.P547L                 | -0.9   | Neutral     | 0    | Damaging  | 0.001 | benign            |
| C78 | 8  | 69002888  | 69002888  | G | C                       | 71  | 0.14 | <i>PREX2</i>   | NM_024870    | Missense        | p.E730Q                 | -1.14  | Neutral     | 0.13 | Tolerated | 0.964 | probably damaging |
| C78 | 7  | 148949838 | 148949838 | G | A                       | 48  | 0.25 | <i>ZNF212</i>  | NM_012256    | Missense        | p.E195K                 | -0.92  | Neutral     | 0.31 | Tolerated | 0.455 | possibly damaging |
| C79 | 22 | 30772543  | 30772543  | C | T                       | 22  | 0.14 | <i>CCDC157</i> | NM_001017437 | Missense        | p.P690S                 | 0.49   | Neutral     | 0.17 | Tolerated | 0.007 | benign            |
| C79 | 20 | 44803387  | 44803387  | C | A                       | 96  | 0.09 | <i>CDH22</i>   | NM_021248    | Missense        | p.D749Y                 | -5.01  | Deleterious | 0    | Damaging  | 0.995 | probably damaging |
| C79 | X  | 14862069  | 14862069  | G | C                       | 18  | 0.17 | <i>FANCB</i>   | NM_001018113 | Missense        | p.L734V                 | -2.32  | Neutral     | 0.01 | Damaging  | 0.998 | probably damaging |

|     |    |           |           |   |   |     |      |                |              |          |          |       |             |      |           |       |                   |
|-----|----|-----------|-----------|---|---|-----|------|----------------|--------------|----------|----------|-------|-------------|------|-----------|-------|-------------------|
| C79 | X  | 14863022  | 14863022  | G | A | 23  | 0.09 | <i>FANCB</i>   | NM_001018113 | Missense | p.S628L  | -2.28 | Neutral     | 1    | Tolerated | 0.021 | benign            |
| C79 | 4  | 46930510  | 46930510  | C | T | 110 | 0.31 | <i>GABRA4</i>  | NM_000809    | Missense | p.R466Q  | 0.25  | Neutral     | 0.24 | Tolerated | 0     | benign            |
| C80 | 10 | 13702524  | 13702524  | G | T | 22  | 0.09 | <i>FRMD4A</i>  | NM_018027    | Missense | p.P564T  | -0.85 | Neutral     | 0.15 | Tolerated | 0.756 | possibly damaging |
| C80 | 1  | 115256528 | 115256528 | T | A | 86  | 0.30 | <i>NRAS</i>    | NM_002524    | Missense | p.Q61H   | -4.43 | Deleterious | 0.01 | Damaging  | 0.294 | benign            |
| C81 | 10 | 70509310  | 70509310  | C | T | 130 | 0.24 | <i>CCAR1</i>   | NM_018237    | Missense | p.S329L  | -2.51 | Deleterious | 0.29 | Tolerated | 0.999 | probably damaging |
| C81 | 2  | 111691094 | 111691094 | G | A | 41  | 0.22 | <i>ACOXL</i>   | NM_001142807 | Missense | p.V312I  | 0.04  | Neutral     | 0.38 | Tolerated | 0.001 | benign            |
| C81 | 2  | 175986221 | 175986221 | C | G | 69  | 0.14 | <i>ATF2</i>    | NM_001880    | Missense | p.E50D   | -1.27 | Neutral     | 0.21 | Tolerated | 0.518 | possibly damaging |
| C81 | 14 | 31355028  | 31355028  | C | G | 84  | 0.18 | <i>COCH</i>    | NM_001135058 | Missense | p.F329L  | -3.52 | Deleterious | 0.2  | Tolerated | 0.997 | probably damaging |
| C81 | 1  | 46870746  | 46870746  | C | G | 119 | 0.16 | <i>FAAH</i>    | NM_001441    | Missense | p.Q124E  | -1.99 | Neutral     | 0.26 | Tolerated | 0.035 | benign            |
| C81 | X  | 150884610 | 150884610 | A | G | 18  | 0.22 | <i>FATE1</i>   | NM_033085    | Missense | p.N7D    | -2    | Neutral     | 0.19 | Tolerated | 0.411 | benign            |
| C81 | 9  | 130155466 | 130155466 | C | T | 46  | 0.43 | <i>GARNL3</i>  | NM_032293    | Missense | p.P992L  | -0.93 | Neutral     | NA   | NA        | 0.063 | benign            |
| C81 | 2  | 109109062 | 109109062 | G | C | 85  | 0.20 | <i>GCC2</i>    | NM_181453    | Missense | p.M1421I | -0.66 | Neutral     | 0.56 | Tolerated | 0.022 | benign            |
| C81 | 2  | 75900583  | 75900583  | G | T | 57  | 0.37 | <i>GCFC2</i>   | NM_003203    | Missense | p.L626M  | -1.47 | Neutral     | 0.07 | Tolerated | 1     | probably damaging |
| C81 | 4  | 62599088  | 62599088  | T | A | 221 | 0.10 | <i>LPHN3</i>   | NM_015236    | Missense | p.N337K  | -3.25 | Deleterious | 0    | Damaging  | 0.999 | probably damaging |
| C81 | 11 | 67800437  | 67800437  | G | C | 61  | 0.44 | <i>NDUFS8</i>  | NM_002496    | Missense | p.D53H   | -4.48 | Deleterious | 0    | Damaging  | 1     | probably damaging |
| C81 | 16 | 50759416  | 50759416  | C | T | 53  | 0.25 | <i>NOD2</i>    | NM_022162    | Missense | p.L967F  | -2.16 | Neutral     | 0.01 | Damaging  | 0.954 | possibly damaging |
| C81 | 10 | 74890477  | 74890477  | G | C | 39  | 0.18 | <i>NUDT13</i>  | NM_015901    | Missense | p.R292T  | 0.15  | Neutral     | 0.01 | Damaging  | 0.017 | benign            |
| C81 | 17 | 36895095  | 36895095  | C | G | 33  | 0.18 | <i>PCGF2</i>   | NM_007144    | Missense | p.E112D  | -2.21 | Neutral     | 0.21 | Tolerated | 0.031 | benign            |
| C81 | 20 | 37121726  | 37121726  | C | G | 22  | 0.27 | <i>RALGAPB</i> | NM_020336    | Missense | p.Q114E  | -0.54 | Neutral     | 0.37 | Tolerated | 0.001 | benign            |
| C81 | 4  | 39291553  | 39291553  | G | A | 152 | 0.39 | <i>RFC1</i>    | NM_001204747 | Missense | p.S1093L | -2.67 | Deleterious | 0.23 | Tolerated | 0.009 | benign            |
| C81 | 6  | 72962492  | 72962492  | C | G | 66  | 0.15 | <i>RIMS1</i>   | NM_014989    | Missense | p.I909M  | -1.95 | Neutral     | 0.02 | Damaging  | 0.992 | probably damaging |
| C81 | 2  | 180008387 | 180008387 | A | G | 82  | 0.40 | <i>SESTD1</i>  | NM_178123    | Missense | p.Y261H  | -2.16 | Neutral     | NA   | NA        | 0.995 | probably damaging |
| C81 | 5  | 128351735 | 128351735 | G | A | 44  | 0.16 | <i>SLC27A6</i> | NM_014031    | Missense | p.R376K  | 2.38  | Neutral     | NA   | NA        | 0     | benign            |
| C81 | 5  | 101572570 | 101572570 | C | G | 59  | 0.37 | <i>SLCO4C1</i> | NM_180991    | Missense | p.E723Q  | -0.43 | Neutral     | 0.31 | Tolerated | 0.849 | possibly damaging |
| C81 | 1  | 118574321 | 118574321 | C | G | 73  | 0.12 | <i>SPAG17</i>  | NM_206996    | Missense | p.E1201D | -0.81 | Neutral     | 0.19 | Tolerated | 0.999 | probably damaging |
| C81 | 7  | 89854811  | 89854811  | G | C | 159 | 0.21 | <i>STEAP2</i>  | NM_152999    | Missense | p.D139H  | -1.56 | Neutral     | 0.08 | Tolerated | 0.95  | possibly damaging |
| C81 | 19 | 48848467  | 48848467  | C | A | 48  | 0.08 | <i>TMEM143</i> | NM_018273    | Missense | p.D172Y  | -4.15 | Deleterious | 0.01 | Damaging  | 1     | probably damaging |
| C81 | 9  | 73457992  | 73457992  | C | G | 100 | 0.11 | <i>TRPM3</i>   | NM_001007471 | Missense | p.R243P  | -3.2  | Deleterious | 0.07 | Tolerated | 1     | probably damaging |
| C81 | 2  | 179594275 | 179594275 | C | T | 87  | 0.32 | <i>TTN</i>     | NM_001267550 | Missense | p.R6203K | -1.19 | Neutral     | 0    | Damaging  | 0.022 | benign            |
| C81 | 19 | 34945425  | 34945425  | G | T | 65  | 0.22 | <i>UBA2</i>    | NM_005499    | Missense | p.L403F  | -0.68 | Neutral     | 0.75 | Tolerated | 0.309 | benign            |
| C81 | 17 | 56058057  | 56058057  | G | A | 29  | 0.21 | <i>VEZF1</i>   | NM_007146    | Missense | p.L295F  | -0.05 | Neutral     | 0.08 | Tolerated | 0.932 | possibly damaging |
| C82 | 1  | 207758146 | 207758146 | C | T | 196 | 0.22 | <i>CR1</i>     | NM_000651    | Missense | p.R1819C | -2.58 | Deleterious | 0.17 | Tolerated | 1     | probably damaging |
| C82 | 9  | 14776191  | 14776191  | T | G | 151 | 0.25 | <i>FREMI</i>   | NM_144966    | Missense | p.S1485R | -3.86 | Deleterious | 0    | Damaging  | 1     | probably damaging |

|     |    |           |           |   |   |     |      |                   |              |          |          |       |             |      |           |       |                   |
|-----|----|-----------|-----------|---|---|-----|------|-------------------|--------------|----------|----------|-------|-------------|------|-----------|-------|-------------------|
| C82 | 5  | 90070067  | 90070067  | G | A | 145 | 0.23 | <i>GPR98</i>      | NM_032119    | Missense | p.R4117H | -0.78 | Neutral     | 0.68 | Tolerated | 0.006 | benign            |
| C83 | 6  | 32712999  | 32712999  | C | G | 102 | 0.10 | <i>HLA-DQA2</i>   | NM_020056    | Missense | p.T49S   | -1.64 | Neutral     | 0.12 | Tolerated | 0.016 | benign            |
| C83 | 17 | 19861720  | 19861720  | G | A | 204 | 0.41 | <i>AKAP10</i>     | NM_007202    | Missense | p.H162Y  | -1.18 | Neutral     | 0.1  | Tolerated | 0.003 | benign            |
| C83 | X  | 63411614  | 63411614  | G | C | 92  | 0.29 | <i>AMER1</i>      | NM_152424    | Missense | p.S518C  | -1.66 | Neutral     | 0.1  | Tolerated | 1     | probably damaging |
| C83 | X  | 129148865 | 129148865 | C | G | 188 | 0.47 | <i>BCORL1</i>     | NM_021946    | nonsense | p.S706_  | NA    | NA          | 0.28 | Tolerated | NA    | NA                |
| C83 | 13 | 103492093 | 103492093 | C | T | 108 | 0.42 | <i>BIVM-ERCC5</i> | NM_001204425 | Missense | p.R464C  | -2.3  | Neutral     | 0    | Damaging  | 1     | probably damaging |
| C83 | 11 | 14991611  | 14991611  | C | A | 31  | 0.29 | <i>CALCA</i>      | NM_001741    | nonsense | p.E33_   | NA    | NA          | 0    | Damaging  | NA    | NA                |
| C83 | 15 | 49054815  | 49054815  | G | C | 152 | 0.44 | <i>CEP152</i>     | NM_001194998 | Missense | p.Q779E  | 0.27  | Neutral     | 1    | Tolerated | 0.046 | benign            |
| C83 | 9  | 101784374 | 101784374 | G | A | 136 | 0.43 | <i>COL15A1</i>    | NM_001855    | Missense | p.G568D  | -3.34 | Deleterious | 0.03 | Damaging  | 0.001 | benign            |
| C83 | 3  | 121591540 | 121591540 | C | G | 115 | 0.40 | <i>EAF2</i>       | NM_018456    | nonsense | p.S214_  | NA    | NA          | 0.32 | Tolerated | NA    | NA                |
| C83 | 4  | 72649719  | 72649719  | A | T | 144 | 0.40 | <i>GC</i>         | NM_001204307 | Missense | p.V25E   | -2.04 | Neutral     | 0    | Damaging  | 0.818 | possibly damaging |
| C83 | 3  | 37323516  | 37323516  | G | A | 107 | 0.53 | <i>GOLGA4</i>     | NM_001172713 | Missense | p.R99Q   | -1.91 | Neutral     | 0.04 | Damaging  | 1     | probably damaging |
| C83 | 15 | 33023118  | 33023118  | C | G | 54  | 0.54 | <i>GREM1</i>      | NM_013372    | Missense | p.S76C   | -4.15 | Deleterious | 0.01 | Damaging  | 1     | probably damaging |
| C83 | 8  | 145066727 | 145066727 | G | A | 261 | 0.43 | <i>GRINA</i>      | NM_000837    | Missense | p.R306H  | -2.25 | Neutral     | 0.16 | Tolerated | 0.999 | probably damaging |
| C83 | 6  | 43589830  | 43589830  | G | C | 61  | 0.39 | <i>GTPBP2</i>     | NM_019096    | Missense | p.F514L  | -3.79 | Deleterious | 0.16 | Tolerated | 0.981 | probably damaging |
| C83 | 10 | 124896669 | 124896669 | G | C | 104 | 0.09 | <i>HMX3</i>       | NM_001105574 | Missense | p.E166Q  | -1.04 | Neutral     | 0.2  | Tolerated | 0.9   | possibly damaging |
| C83 | 8  | 103664601 | 103664601 | C | G | 74  | 0.46 | <i>KLF10</i>      | NM_005655    | Missense | p.E21Q   | -1.93 | Neutral     | 0    | Damaging  | 0.883 | possibly damaging |
| C83 | 2  | 141242919 | 141242919 | G | C | 103 | 0.46 | <i>LRP1B</i>      | NM_018557    | Missense | p.Q3140E | -1.21 | Neutral     | 1    | Tolerated | 0.006 | benign            |
| C83 | 6  | 90384205  | 90384205  | G | A | 41  | 0.49 | <i>MDN1</i>       | NM_014611    | Missense | p.R4289C | -4.84 | Deleterious | 0.05 | Damaging  | 0.999 | probably damaging |
| C83 | 8  | 89209517  | 89209517  | C | T | 34  | 0.44 | <i>MMP16</i>      | NM_005941    | Missense | p.G51S   | -4.67 | Deleterious | 0.04 | Damaging  | 1     | probably damaging |
| C83 | 14 | 105936422 | 105936422 | C | G | 93  | 0.48 | <i>MTA1</i>       | NM_004689    | nonsense | p.S673_  | NA    | NA          | 0.01 | Damaging  | NA    | NA                |
| C83 | 16 | 86565986  | 86565986  | G | T | 61  | 0.41 | <i>MTHFSD</i>     | NM_001159378 | Missense | p.H261Q  | -0.32 | Neutral     | 0.33 | Tolerated | 0.207 | benign            |
| C83 | 15 | 48435137  | 48435137  | C | G | 238 | 0.50 | <i>MYEF2</i>      | NM_016132    | Missense | p.E591Q  | -1.45 | Neutral     | 0.24 | Tolerated | 0.999 | probably damaging |
| C83 | 11 | 7079555   | 7079555   | C | G | 117 | 0.53 | <i>NLRP14</i>     | NM_176822    | Missense | p.S836C  | -2.61 | Deleterious | 0.01 | Damaging  | 1     | probably damaging |
| C83 | 5  | 68805051  | 68805051  | C | G | 148 | 0.52 | <i>OCLN</i>       | NM_002538    | Missense | p.S45C   | -4.2  | Deleterious | 0    | Damaging  | 1     | probably damaging |
| C83 | 11 | 58207423  | 58207423  | C | A | 68  | 0.54 | <i>OR5B12</i>     | NM_001004733 | Missense | p.D68Y   | -8.96 | Deleterious | 0    | Damaging  | 1     | probably damaging |
| C83 | 13 | 25021323  | 25021323  | A | G | 38  | 0.18 | <i>PARP4</i>      | NM_006437    | Missense | p.I1039T | -3.94 | Deleterious | 0.01 | Damaging  | 0.856 | possibly damaging |
| C83 | 10 | 56128882  | 56128882  | C | G | 56  | 0.45 | <i>PCDH15</i>     | NM_001142763 | Missense | p.E163Q  | -2.5  | Deleterious | 0    | Damaging  | 1     | probably damaging |
| C83 | 13 | 53418719  | 53418719  | C | G | 26  | 0.38 | <i>PCDH8</i>      | NM_002590    | Missense | p.K1063N | -0.32 | Neutral     | 0.03 | Damaging  | 0.302 | benign            |
| C83 | 6  | 41705498  | 41705498  | G | T | 34  | 0.74 | <i>PGC</i>        | NM_002630    | Missense | p.F328L  | -4.44 | Deleterious | 0.09 | Tolerated | 0.268 | benign            |
| C83 | X  | 54012212  | 54012212  | G | A | 43  | 0.37 | <i>PHF8</i>       | NM_001184898 | nonsense | p.Q682_  | NA    | NA          | 0.56 | Tolerated | NA    | NA                |
| C83 | 3  | 64085170  | 64085170  | C | T | 86  | 0.43 | <i>PRICKLE2</i>   | NM_198859    | Missense | p.A698T  | -1.92 | Neutral     | 0    | Damaging  | 1     | probably damaging |

|     |    |           |           |    |    |     |      |                 |              |                 |           |       |             |      |           |       |                   |
|-----|----|-----------|-----------|----|----|-----|------|-----------------|--------------|-----------------|-----------|-------|-------------|------|-----------|-------|-------------------|
| C83 | 1  | 57169915  | 57169915  | G  | C  | 137 | 0.51 | <i>PRKAA2</i>   | NM_006252    | Missense        | p.D354H   | -0.6  | Neutral     | 0.21 | Tolerated | 0.228 | benign            |
| C83 | 10 | 120354242 | 120354242 | G  | A  | 131 | 0.49 | <i>PRLHR</i>    | NM_004248    | Missense        | p.S172L   | -2.87 | Deleterious | 0    | Damaging  | 1     | probably damaging |
| C83 | X  | 48433668  | 48433668  | G  | A  | 155 | 0.50 | <i>RBM3</i>     | NM_006743    | Missense        | p.E34K    | -2.03 | Neutral     | 0.11 | Tolerated | 0.379 | benign            |
| C83 | 1  | 167663379 | 167663379 | C  | T  | 74  | 0.24 | <i>RCSD1</i>    | NM_052862    | Missense        | p.S105L   | -3.39 | Deleterious | 0.09 | Tolerated | 1     | probably damaging |
| C83 | 16 | 53721803  | 53721803  | C  | G  | 39  | 0.44 | <i>RPGRIP1L</i> | NM_015272    | Missense        | p.E202Q   | -1.67 | Neutral     | 0.12 | Tolerated | 0.143 | benign            |
| C83 | 17 | 38787032  | 38787032  | C  | G  | 88  | 0.51 | <i>SMARCE1</i>  | NM_003079    | Missense        | p.E321Q   | -0.38 | Neutral     | 0.39 | Tolerated | 0.596 | possibly damaging |
| C83 | 17 | 35937489  | 35937489  | A  | C  | 162 | 0.47 | <i>SYNRG</i>    | NM_007247    | Missense        | p.I271S   | -0.33 | Neutral     | 0.08 | Tolerated | 0.012 | benign            |
| C83 | 11 | 64896053  | 64896053  | C  | T  | 60  | 0.48 | <i>SYVNI</i>    | NM_172230    | Missense        | p.E577K   | 0     | Neutral     | 0.86 | Tolerated | 0.215 | benign            |
| C83 | 22 | 22599370  | 22599370  | A  | G  | 28  | 0.82 | <i>VPREB1</i>   | NM_007128    | Missense        | p.Q20R    | -3.61 | Deleterious | 0.03 | Damaging  | 0.974 | probably damaging |
| C83 | 4  | 1962801   | 1962801   | G  | A  | 94  | 0.46 | <i>WHSC1</i>    | NM_001042424 | Missense        | p.E1099K  | -3.29 | Deleterious | 0.01 | Damaging  | 1     | probably damaging |
| C83 | 9  | 104170480 | 104170480 | G  | A  | 140 | 0.45 | <i>ZNF189</i>   | NM_003452    | Missense        | p.E144K   | -0.29 | Neutral     | 0.05 | Damaging  | 0.167 | benign            |
| C83 | 19 | 44739542  | 44739542  | G  | C  | 145 | 0.46 | <i>ZNF227</i>   | NM_182490    | Missense        | p.G320A   | -2.68 | Deleterious | 0.01 | Damaging  | 0.99  | probably damaging |
| C83 | 10 | 61083760  | 61083760  | C  | T  | 83  | 0.51 | <i>FAM13C</i>   | NM_198215    | Missense        | p.R144Q   | -0.95 | Neutral     | 0.08 | Tolerated | 0.055 | benign            |
| C83 | X  | 2779579   | 2779579   | T  | TG | 39  | 0.41 | <i>GYG2</i>     | NM_003918    | Frame_Shift_Ins | p.V316fs  | NA    | NA          | NA   | NA        | NA    | NA                |
| C84 | 4  | 1017706   | 1017706   | C  | T  | 75  | 0.12 | <i>FGFRL1</i>   | NM_001004356 | Missense        | p.R179W   | -4.53 | Deleterious | 0.02 | Damaging  | 0.999 | probably damaging |
| C84 | 14 | 65239614  | 65239614  | C  | T  | 107 | 0.15 | <i>SPTB</i>     | NM_001024858 | Missense        | p.R1746Q  | -3.56 | Deleterious | 0    | Damaging  | 1     | probably damaging |
| C84 | 4  | 79229294  | 79229294  | G  | A  | 66  | 0.38 | <i>FRAS1</i>    | NM_025074    | Missense        | p.V537M   | -1.18 | Neutral     | 0.09 | Tolerated | 0.879 | possibly damaging |
| C84 | 9  | 131721149 | 131721149 | C  | A  | 18  | 0.11 | <i>NUP188</i>   | NM_015354    | Missense        | p.F147L   | -2.76 | Deleterious | 0.03 | Damaging  | 0.963 | probably damaging |
| C84 | 3  | 77684173  | 77684173  | C  | T  | 98  | 0.37 | <i>ROBO2</i>    | NM_002942    | nonsense        | p.R1305_  | NA    | NA          | 1    | Tolerated | NA    | NA                |
| C84 | 5  | 32385747  | 32385747  | G  | T  | 26  | 0.38 | <i>ZFR</i>      | NM_016107    | Missense        | p.S836R   | -2.51 | Deleterious | 0.01 | Damaging  | 0.846 | possibly damaging |
| C85 | 4  | 967182    | 967182    | C  | A  | 22  | 0.09 | <i>DGKQ</i>     | NM_001347    | Missense        | p.G30V    | -0.98 | Neutral     | 0.05 | Damaging  | 0.901 | possibly damaging |
| C85 | 12 | 25398285  | 25398285  | C  | T  | 89  | 0.25 | <i>KRAS</i>     | NM_033360    | Missense        | p.G12S    | -4.44 | Deleterious | 0.01 | Damaging  | 0.682 | possibly damaging |
| C85 | 4  | 141074043 | 141074043 | C  | A  | 21  | 0.10 | <i>MAML3</i>    | NM_018717    | Missense        | p.A147S   | -0.13 | Neutral     | 0.63 | Tolerated | 0.002 | benign            |
| C86 | 10 | 102822384 | 102822384 | C  | T  | 13  | 0.15 | <i>KAZALD1</i>  | NM_030929    | Missense        | p.A12V    | -0.41 | Neutral     | 0.18 | Tolerated | 0.001 | benign            |
| C86 | 11 | 60540905  | 60540905  | C  | T  | 20  | 0.10 | <i>MS4A15</i>   | NM_001098835 | Missense        | p.A149V   | -1.32 | Neutral     | 0.64 | Tolerated | 0.011 | benign            |
| C86 | 17 | 43907524  | 43907524  | G  | A  | 63  | 0.37 | <i>CRHR1</i>    | NM_001145146 | Missense        | p.A196T   | -1.02 | Neutral     | 0.01 | Damaging  | 0.253 | benign            |
| C86 | 2  | 84771536  | 84771536  | C  | A  | 54  | 0.50 | <i>DNAH6</i>    | NM_001370    | Missense        | p.A281D   | -4.04 | Deleterious | NA   | NA        | 0.848 | possibly damaging |
| C86 | 11 | 126134396 | 126134396 | C  | T  | 22  | 0.09 | <i>SRPR</i>     | NM_003139    | Missense        | p.A522T   | -3.95 | Deleterious | 0.05 | Damaging  | 0.998 | probably damaging |
| C86 | 1  | 55089061  | 55089061  | C  | A  | 39  | 0.59 | <i>FAM151A</i>  | NM_176782    | Missense        | p.C3F     | -2.37 | Neutral     | 0.03 | Damaging  | 0.001 | benign            |
| C86 | 18 | 24497291  | 24497291  | C  | A  | 109 | 0.45 | <i>CHST9</i>    | NM_031422    | Missense        | p.E88D    | -0.82 | Neutral     | 0.28 | Tolerated | 0.156 | benign            |
| C86 | 4  | 52861843  | 52861843  | G  | T  | 120 | 0.41 | <i>LRRC66</i>   | NM_001024611 | Missense        | p.L449I   | -0.57 | Neutral     | 0.23 | Tolerated | 0.51  | possibly damaging |
| C86 | 7  | 50680520  | 50680520  | T  | C  | 12  | 1.00 | <i>GRB10</i>    | NM_005311    | Missense        | p.N371S   | -0.46 | Neutral     | 0.95 | Tolerated | 0.002 | benign            |
| C86 | 3  | 77657037  | 77657037  | TC | T  | 44  | 0.36 | <i>ROBO2</i>    | NM_002942    | Frame_Shift_Del | p.P1078fs | NA    | NA          | NA   | NA        | NA    | NA                |

|     |    |           |           |   |                         |     |      |                 |              |                 |              |                   |             |         |           |       |                   |    |
|-----|----|-----------|-----------|---|-------------------------|-----|------|-----------------|--------------|-----------------|--------------|-------------------|-------------|---------|-----------|-------|-------------------|----|
| C86 | 1  | 150460440 | 150460440 | C | A                       | 20  | 0.10 | <i>TARS2</i>    | NM_025150    | Missense        | p.P58H       | -2.27             | Neutral     | 0.1     | Tolerated | 0.001 | benign            |    |
| C86 | 7  | 150839561 | 150839561 | C | CT                      | 57  | 0.35 | <i>AGAP3</i>    | NM_031946    | Frame_Shift_Ins | p.R374fs     | NA                | NA          | NA      | NA        | NA    | NA                |    |
| C86 | 3  | 119190272 | 119190272 | G | T                       | 45  | 0.42 | <i>POGLUTI1</i> | NM_152305    | Missense        | p.R98L       | -6.87             | Deleterious | 0.5     | Tolerated | 0.998 | probably damaging |    |
| C86 | 5  | 82835698  | 82835698  | T | A                       | 85  | 0.44 | <i>VCAN</i>     | NM_004385    | Missense        | p.S2292R     | -0.88             | Neutral     | 0.07    | Tolerated | 0.047 | benign            |    |
| C86 | 4  | 62849222  | 62849222  | C | A                       | 66  | 0.41 | <i>LPHN3</i>    | NM_015236    | nonsense        | p.S978_      | NA                | NA          | 1       | Tolerated | NA    | NA                |    |
| C86 | 7  | 122337939 | 122337939 | G | T                       | 82  | 0.41 | <i>RNF133</i>   | NM_139175    | Missense        | p.T345N      | -0.06             | Neutral     | 0.52    | Tolerated | 0.04  | benign            |    |
| C86 | 19 | 15989730  | 15989730  | T | C                       | 26  | 0.19 | <i>CYP4F2</i>   | NM_001082    | Missense        | p.T472A      | -2.06             | Neutral     | 0.47    | Tolerated | 0     | benign            |    |
| C86 | 12 | 15095465  | 15095465  | C | A                       | 30  | 0.27 | <i>ARHGD1B</i>  | NM_001175    | Missense        | p.W199C      | -11.73            | Deleterious | 0       | Damaging  | 1     | probably damaging |    |
| C87 | 7  | 48316074  | 48316074  | T | G                       | 43  | 0.51 | <i>ABCA13</i>   | NM_152701    | Missense        | p.F2271V     | -1.83             | Neutral     | NA      | NA        | 0.018 | benign            |    |
| C87 | 11 | 125864193 | 125864193 | C | A                       | 28  | 0.14 | <i>CDON</i>     | NM_001243597 | Missense        | p.R879M      | -3.27             | Deleterious | 0       | Damaging  | 1     | probably damaging |    |
| C87 | 1  | 79392673  | 79392673  | C | A                       | 18  | 0.28 | <i>ELTD1</i>    | NM_022159    | Missense        | p.E327D      | -0.06             | Neutral     | NA      | NA        | 0.27  | benign            |    |
| C87 | 9  | 131019537 | 131019537 | C | A                       | 24  | 0.08 | <i>GOLGA2</i>   | NM_004486    | Missense        | p.G940C      | -1.77             | Neutral     | 0.01    | Damaging  | 0.999 | probably damaging |    |
| C87 | 1  | 150676820 | 150676820 | C | A                       | 20  | 0.10 | <i>HORMAD1</i>  | NM_032132    | Splice Site     | p.D269sp     |                   | NA          | NA      | NA        | NA    | NA                |    |
| C87 | 5  | 133914430 | 133914430 | G | A                       | 62  | 0.47 | <i>PHF15</i>    | NM_015288    | Missense        | p.R599H      | -1.67             | Neutral     | 0.24    | Tolerated | 1     | probably damaging |    |
| C87 | 20 | 50408582  | 50408582  | G | A                       | 77  | 0.52 | <i>SALL4</i>    | NM_020436    | Missense        | p.P147L      | -0.25             | Neutral     | 0.34    | Tolerated | 0     | benign            |    |
| C87 | 20 | 35491480  | 35491480  | C | A                       | 34  | 0.09 | <i>SOGA1</i>    | NM_080627    | Missense        | p.G90W       | -1.16             | Neutral     | 0       | Damaging  | NA    | NA                |    |
| C87 | 2  | 171573367 | 171573367 | C | T                       | 30  | 0.30 | <i>SP5</i>      | NM_001003845 | Missense        | p.P217L      | -1.58             | Neutral     | 0.36    | Tolerated | 0     | benign            |    |
| C88 | 1  | 55603221  | 55603221  | A | ACTG                    | 111 | 0.36 | <i>USP24</i>    | NM_015306    |                 | p.1056_1056S | -1.56             | Neutral     | NA      | NA        | NA    | NA                |    |
|     |    |           |           |   |                         |     |      |                 |              | In_Frame_Ins    | >SS          |                   |             |         |           |       |                   |    |
| C88 | 16 | 84476125  | 84476125  | G | T                       | 79  | 0.27 | <i>ATP2C2</i>   | NM_014861    | Missense        | p.V441F      | -3.91             | Deleterious | 0.02    | Damaging  | 0.984 | probably damaging |    |
| C88 | 9  | 117038025 | 117038025 | C | T                       | 76  | 0.14 | <i>COL27A1</i>  | NM_032888    | Missense        | p.P1232S     | -1.35             | Neutral     | 0.67    | Tolerated | 0.872 | possibly damaging |    |
| C88 | 11 | 102819876 | 102819876 | C | T                       | 77  | 0.35 | <i>MMP13</i>    | NM_002427    | Missense        | p.R310H      | -4.52             | Deleterious | 0       | Damaging  | 1     | probably damaging |    |
| C89 | 6  | 26637796  | 26637796  | C | A                       | 20  | 0.20 | <i>ZNF322</i>   | NM_001242798 | Missense        | p.G329V      | -0.1              | Neutral     | 0.05    | Damaging  | 0.149 | benign            |    |
| C89 | 9  | 100092968 | 100092968 | A | AGAGGA<br>G             | 44  | 0.32 | <i>CCDC180</i>  | NM_020893    |                 | p.915_915E>E | 0.28              | Neutral     | NA      | NA        | NA    | NA                |    |
|     |    |           |           |   |                         |     |      |                 |              | In_Frame_Ins    | EE           |                   |             |         |           |       |                   |    |
| C89 | 9  | 2039776   | 2039776   | A | ACAG                    | 51  | 0.43 | <i>SMARCA2</i>  | NM_003070    |                 | p.223_223Q>  | -0.09             | Neutral     | NA      | NA        | NA    | NA                |    |
|     |    |           |           |   |                         |     |      |                 |              | In_Frame_Ins    | QQ           |                   |             |         |           |       |                   |    |
| C89 | 9  | 124855337 | 124855337 | C | T                       | 26  | 0.12 | <i>TLL1</i>     | NM_001139442 | Missense        | p.E121K      | -0.91             | Neutral     | NA      | NA        | 0.514 | possibly damaging |    |
| C89 | 9  | 112811015 | 112811015 |   | TCCCCCGGA<br>GTCTCCTGGA | T   | 22   | 0.41            | <i>AKAP2</i> | NM_001198656    | In_Frame_Del | p.PPESPG19d<br>el | -0.22       | Neutral | NA        | NA    | NA                | NA |
| C90 | 11 | 89447517  | 89447517  | T | C                       | 58  | 0.47 | <i>TRIM77</i>   | NM_001146162 | Missense        | p.M222T      | NA                | NA          | NA      | NA        | NA    | NA                |    |
| C90 | 13 | 28608281  | 28608281  | A | T                       | 63  | 0.65 | <i>FLT3</i>     | NM_004119    | Missense        | p.V592D      | -6.04             | Deleterious | 0       | Damaging  | 0.881 | possibly damaging |    |
| C90 | 4  | 2172860   | 2172860   | G | A                       | 85  | 0.40 | <i>POLN</i>     | NM_181808    | Missense        | p.R475W      | -3.3              | Deleterious | 0       | Damaging  | 0.996 | probably damaging |    |

|     |    |           |           |           |   |     |      |                 |              |                 |                                   |       |             |      |           |       |                   |
|-----|----|-----------|-----------|-----------|---|-----|------|-----------------|--------------|-----------------|-----------------------------------|-------|-------------|------|-----------|-------|-------------------|
| C90 | 6  | 18218070  | 18218070  | A         | T | 38  | 0.32 | <i>KDM1B</i>    | NM_153042    | Missense        | p.D548V                           | -7.73 | Deleterious | 0    | Damaging  | 1     | probably damaging |
| C90 | 7  | 148454139 | 148454139 | G         | A | 30  | 0.43 | <i>CUL1</i>     | NM_003592    | Missense        | p.R127Q                           | 1.21  | Neutral     | 0.48 | Tolerated | 0.009 | benign            |
| C90 | 8  | 38297866  | 38297866  | C         | T | 27  | 0.33 | <i>FGFR1</i>    | NM_001174064 | Missense        | p.G9S                             | 0.49  | Neutral     | 0.91 | Tolerated | 0.004 | benign            |
| C90 | 9  | 139741265 | 139741265 | C         | T | 26  | 0.50 | <i>C9orf172</i> | NM_001080482 | Missense        | p.A800V                           | 0.45  | Neutral     | 0.76 | Tolerated | 0.951 | possibly damaging |
| C90 | 1  | 152975658 | 152975658 | CTGTACCAA | A | 15  | 0.40 | <i>SPRR3</i>    | NM_005416    | In_Frame_Del    | p.EPGCTKVP<br>95del               | -9.33 | Deleterious | NA   | NA        | NA    | NA                |
| C90 | 12 | 49942953  | 49942953  | GGCA      | G | 33  | 0.39 | <i>KCNH3</i>    | NM_012284    | In_Frame_Ins    | p.489_490insS                     | -9.53 | Deleterious | NA   | NA        | NA    | NA                |
| C90 | 2  | 27324253  | 27324253  | CTGGGCCCG | G | 34  | 0.24 | <i>CGREF1</i>   | NM_001166239 | In_Frame_Del    | p.EGDAPGPR<br>GEAGGQAE<br>A248del | 1.04  | Neutral     | NA   | NA        | NA    | NA                |
| C91 | 19 | 14037500  | 14037500  | CGCTGCT   | A | 140 | 0.35 | <i>CC2D1A</i>   | NM_017721    | Missense        | p.D679N                           | -4.98 | Deleterious | 0.14 | Tolerated | 1     | probably damaging |
| C91 | 14 | 92537353  | 92537353  | GCTGCTG   | C | 40  | 0.20 | <i>ATXN3</i>    | NM_004993    | In_Frame_Ins    | p.306_306G><br>EQQQQQQ<br>QQQQQR  | -1.38 | Neutral     | NA   | NA        | NA    | NA                |
| C91 | 3  | 100170625 | 100170625 | ATTCCGA   | C | 93  | 0.59 | <i>LNP1</i>     | NM_001085451 | Frame_Shift_Ins | p.R79fs                           | NA    | NA          | NA   | NA        | NA    | NA                |
| C92 | 1  | 45241721  | 45241721  | TGCCG     | G | 71  | 0.45 | <i>RPS8</i>     | NM_001012    | Missense        | p.N7S                             | 0.16  | Neutral     | 1    | Tolerated | 0     | benign            |
| C92 | 13 | 103346742 | 103346742 |           | T | 43  | 0.44 | <i>METTL21C</i> | NM_001010977 | Missense        | p.D36V                            | -1.27 | Neutral     | 0.33 | Tolerated | 0.745 | possibly damaging |
| C92 | 16 | 66436747  | 66436747  |           | C | 87  | 0.37 | <i>CDH5</i>     | NM_001795    | Missense        | p.A677V                           | -0.5  | Neutral     | 0.14 | Tolerated | 0.726 | possibly damaging |
| C93 | 1  | 22915717  | 22915717  |           | G | 58  | 0.36 | <i>EPHA8</i>    | NM_001006943 | Missense        | p.V445I                           | -0.01 | Neutral     | NA   | NA        | 0.164 | benign            |
| C93 | 1  | 26139220  | 26139220  |           | G | 28  | 0.54 | <i>SEPN1</i>    | NM_020451    | Missense        | p.A442T                           | -1.7  | Neutral     | 0.03 | Damaging  | 0.647 | possibly damaging |
| C93 | 11 | 17408533  | 17408533  |           | C | 45  | 0.42 | <i>KCNJ11</i>   | NM_000525    | Missense        | p.R369H                           | -1.26 | Neutral     | 0.02 | Damaging  | 1     | probably damaging |
| C93 | 15 | 59510118  | 59510118  |           | T | 41  | 0.46 | <i>MYO1E</i>    | NM_004998    | Missense        | p.H360L                           | -5.01 | Deleterious | 0    | Damaging  | 0.019 | benign            |
| C93 | 2  | 103068619 | 103068619 |           | G | 55  | 0.45 | <i>IL18RAP</i>  | NM_003853    | Missense        | p.S593N                           | -0.95 | Neutral     | 0.36 | Tolerated | 0.006 | benign            |
| C93 | 5  | 35072820  | 35072820  |           | C | 69  | 0.43 | <i>PRLR</i>     | NM_000949    | Missense        | p.A134S                           | 0.8   | Neutral     | 0.18 | Tolerated | 0     | benign            |

|     |    |           |           |   |         |     |      |                 |              |                 |              |       |             |      |           |       |                   |
|-----|----|-----------|-----------|---|---------|-----|------|-----------------|--------------|-----------------|--------------|-------|-------------|------|-----------|-------|-------------------|
| C93 | 5  | 78379100  | 78379100  | G | A       | 40  | 0.25 | <i>BHMT2</i>    | NM_017614    | nonsense        | p.W228_      | NA    | NA          | 0.19 | Tolerated | NA    | NA                |
| C93 | 6  | 51619602  | 51619602  | C | T       | 62  | 0.34 | <i>PKHD1</i>    | NM_138694    | Missense        | p.R2926Q     | -0.91 | Neutral     | 0.11 | Tolerated | 0.988 | probably damaging |
| C93 | 7  | 6080788   | 6080788   | G | A       | 55  | 0.42 | <i>EIF2AK1</i>  | NM_014413    | Missense        | p.T285I      | -2.04 | Neutral     | 0.18 | Tolerated | 0.067 | benign            |
|     |    |           |           |   | AAGGCA  |     |      |                 |              |                 |              |       |             |      |           |       |                   |
|     |    |           |           |   | TTCTCAT |     |      |                 |              |                 |              |       |             |      |           |       |                   |
| C93 | 3  | 100170607 | 100170607 | A | GAGGAC  | 115 | 0.25 | <i>LNP1</i>     | NM_001085451 | Frame_Shift_Ins | p.R68fs      | NA    | NA          | NA   | NA        | NA    | NA                |
|     |    |           |           |   | CAGGAA  |     |      |                 |              |                 |              |       |             |      |           |       |                   |
|     |    |           |           |   | TTCCGAT |     |      |                 |              |                 |              |       |             |      |           |       |                   |
|     |    |           |           |   | GCCG    |     |      |                 |              |                 |              |       |             |      |           |       |                   |
| C94 | 18 | 29848289  | 29848289  | G | C       | 53  | 0.30 | <i>GAREM</i>    | NM_001242409 | Missense        | p.P726A      | -2.15 | Neutral     | 0.02 | Damaging  | 1     | probably damaging |
| C94 | 19 | 875264    | 875264    | C | T       | 14  | 0.43 | <i>MED16</i>    | NM_005481    | Missense        | p.C584Y      | -5.25 | Deleterious | 0.46 | Tolerated | 0.997 | probably damaging |
| C94 | 22 | 30772543  | 30772543  | C | T       | 16  | 0.13 | <i>CCDC157</i>  | NM_001017437 | Missense        | p.P690S      | 0.49  | Neutral     | 0.17 | Tolerated | 0.007 | benign            |
|     |    |           |           |   | CGCTGCT |     |      |                 |              |                 |              |       |             |      |           |       |                   |
|     |    |           |           |   | GCTGCTG |     |      |                 |              |                 |              |       |             |      |           |       |                   |
|     |    |           |           |   | CTGCTGC |     |      |                 |              |                 | p.306_306G>  |       |             |      |           |       |                   |
| C94 | 14 | 92537353  | 92537353  | C | TGCTGCT | 24  | 0.38 | <i>ATXN3</i>    | NM_004993    |                 | EQQQQQQQ     | -1.77 | Neutral     | NA   | NA        | NA    | NA                |
|     |    |           |           |   | GCTGCTG |     |      |                 |              |                 | QQQQQQR      |       |             |      |           |       |                   |
|     |    |           |           |   | CTGCTGC |     |      |                 |              |                 |              |       |             |      |           |       |                   |
|     |    |           |           |   | T       |     |      |                 |              | In_Frame_Ins    |              |       |             |      |           |       |                   |
|     |    |           |           |   | ATCCTAG |     |      |                 |              |                 |              |       |             |      |           |       |                   |
|     |    |           |           |   | AAGGCA  |     |      |                 |              |                 |              |       |             |      |           |       |                   |
|     |    |           |           |   | TTCTCAT |     |      |                 |              |                 | p.66_67insRR |       |             |      |           |       |                   |
| C94 | 3  | 100170600 | 100170600 | A | GAGGAC  | 44  | 0.91 | <i>LNP1</i>     | NM_001085451 |                 | HSHEDEQEFR   | -4.77 | Deleterious | NA   | NA        | NA    | NA                |
|     |    |           |           |   | CAGGAA  |     |      |                 |              |                 | CRP          |       |             |      |           |       |                   |
|     |    |           |           |   | TTCCGAT |     |      |                 |              |                 |              |       |             |      |           |       |                   |
|     |    |           |           |   | GCCG    |     |      |                 |              | In_Frame_Ins    |              |       |             |      |           |       |                   |
| C95 | 1  | 181058201 | 181058201 | C | T       | 11  | 0.27 | <i>IER5</i>     | NM_016545    | Missense        | p.L55F       | -2.68 | Deleterious | 0.02 | Damaging  | 0.375 | benign            |
| C95 | 19 | 34955037  | 34955037  | G | T       | 22  | 0.14 | <i>UBA2</i>     | NM_005499    | Splice Site     | p.S535sp     | NA    | NA          | NA   | NA        | NA    | NA                |
| C95 | 2  | 27324371  | 27324371  | C | T       | 16  | 0.25 | <i>CGREF1</i>   | NM_001166239 | Missense        | p.G243E      | -0.08 | Neutral     | 0.34 | Tolerated | 0.36  | benign            |
| C95 | X  | 154194714 | 154194714 | C | T       | 39  | 0.69 | <i>F8</i>       | NM_000132    | Missense        | p.A420T      | -0.13 | Neutral     | 0.87 | Tolerated | 0.002 | benign            |
| C96 | 10 | 128193128 | 128193128 | G | T       | 143 | 0.56 | <i>C10orf90</i> | NM_001004298 | Missense        | p.T214N      | -0.44 | Neutral     | 0.13 | Tolerated | 0.804 | possibly damaging |
| C96 | 11 | 88029392  | 88029392  | C | T       | 73  | 0.29 | <i>CTSC</i>     | NM_001814    | Missense        | p.M266I      | -2.95 | Deleterious | NA   | NA        | 0.969 | probably damaging |
| C96 | 12 | 112888198 | 112888198 | G | A       | 91  | 0.25 | <i>PTPN11</i>   | NM_002834    | Missense        | p.A72T       | -3.45 | Deleterious | 0.05 | Damaging  | 0.996 | probably damaging |







|      |    |           |           |      |        |     |      |                 |              |                 |                        |        |             |      |           |       |                   |
|------|----|-----------|-----------|------|--------|-----|------|-----------------|--------------|-----------------|------------------------|--------|-------------|------|-----------|-------|-------------------|
| C100 | 7  | 1478631   | 1478631   | G    | A      | 27  | 0.19 | <i>MICALL2</i>  | NM_182924    | Missense        | p.A656V                | -1.07  | Neutral     | 0.53 | Tolerated | 0.791 | possibly damaging |
| C101 | 11 | 88241905  | 88241905  | G    | T      | 128 | 0.34 | <i>GRM5</i>     | NM_001143831 | Missense        | p.P1165Q               | -4.1   | Deleterious | NA   | NA        | 1     | probably damaging |
| C101 | 13 | 28608329  | 28608329  | A    | T      | 46  | 0.35 | <i>FLT3</i>     | NM_004119    | Missense        | p.L576Q                | -2.28  | Neutral     | 0    | Damaging  | 0.867 | possibly damaging |
|      |    |           |           |      |        |     |      | ACCATGGTCC      |              |                 |                        |        |             |      |           |       |                   |
|      |    |           |           |      |        |     |      | AGGGCCCTG       |              |                 |                        |        |             |      |           |       |                   |
| C101 | 15 | 40648365  | 40648365  | A    | A      | 55  | 0.31 | <i>PHGR1</i>    | NM_001145643 | In_Frame_Del    | p.HGPGPCGP<br>PPG38del | -48.33 | Deleterious | NA   | NA        | NA    | NA                |
|      |    |           |           |      |        |     |      | CGGGCCAC        |              |                 |                        |        |             |      |           |       |                   |
|      |    |           |           |      |        |     |      | CCCCTGG         |              |                 |                        |        |             |      |           |       |                   |
| C102 | 1  | 115258747 | 115258747 | C    | T      | 48  | 0.42 | <i>NRAS</i>     | NM_002524    | Missense        | p.G12D                 | -5.35  | Deleterious | 0    | Damaging  | 0.372 | benign            |
| C102 | 10 | 61028336  | 61028336  | A    | T      | 45  | 0.11 | <i>FAM13C</i>   | NM_198215    | Missense        | p.F307I                | -5.73  | Deleterious | 0    | Damaging  | 1     | probably damaging |
| C102 | 13 | 28609758  | 28609758  | C    | A      | 171 | 0.12 | <i>FLT3</i>     | NM_004119    | Missense        | p.V491L                | -0.39  | Neutral     | 0.87 | Tolerated | 0.792 | possibly damaging |
| C102 | 2  | 29450475  | 29450475  | C    | A      | 34  | 0.12 | <i>ALK</i>      | NM_004304    | Missense        | p.S960I                | -2.84  | Deleterious | NA   | NA        | 0.708 | possibly damaging |
| C102 | 20 | 62705890  | 62705890  | G    | A      | 32  | 0.34 | <i>RGS19</i>    | NM_005873    | nonsense        | p.Q53_                 | NA     | NA          | 0.42 | Tolerated | NA    | NA                |
| C102 | 4  | 110897177 | 110897177 | C    | A      | 31  | 0.10 | <i>EGF</i>      | NM_001963    | Missense        | p.F613L                | -4.83  | Deleterious | 0    | Damaging  | 0.759 | possibly damaging |
| C102 | 7  | 1539133   | 1539133   | G    | A      | 40  | 0.28 | <i>INTS1</i>    | NM_001080453 | Missense        | p.R274C                | -2.66  | Deleterious | 0.05 | Damaging  | 0.998 | probably damaging |
| C102 | 9  | 119976922 | 119976922 | C    | T      | 76  | 0.11 | <i>ASTN2</i>    | NM_014010    | Missense        | p.A244T                | -1.98  | Neutral     | NA   | NA        | 1     | probably damaging |
| C102 | 1  | 27741446  | 27741446  | TTTC | T      | 60  | 0.27 | <i>WASF2</i>    | NM_006990    | In_Frame_Del    | p.K182del              | -4.53  | Deleterious | NA   | NA        | NA    | NA                |
| CA69 | X  | 132091229 | 132091229 | G    | A      | 136 | 0.42 | <i>HS6ST2</i>   | NM_001077188 | Missense        | p.A185V                | -0.7   | Neutral     | 0.2  | Tolerated | 0.999 | probably damaging |
| CA69 | 3  | 134884864 | 134884864 | C    | T      | 146 | 0.40 | <i>EPHB1</i>    | NM_004441    | Missense        | p.A547V                | -0.49  | Neutral     | 1    | Tolerated | 0.011 | benign            |
| CA69 | X  | 44703391  | 44703391  | G    | A      | 43  | 0.47 | <i>DUSP21</i>   | NM_022076    | Missense        | p.A5T                  | -0.1   | Neutral     | 0.54 | Tolerated | 0.024 | benign            |
| CA69 | 8  | 9588469   | 9588469   | G    | A      | 89  | 0.40 | <i>TNKS</i>     | NM_003747    | Missense        | p.A691T                | -3.39  | Deleterious | 0.04 | Damaging  | 0.964 | probably damaging |
| CA69 | 10 | 5789068   | 5789068   | C    | G      | 140 | 0.46 | <i>FAM208B</i>  | NM_017782    | Missense        | p.C1228W               | -1.78  | Neutral     | 0.05 | Damaging  | 0.657 | possibly damaging |
| CA69 | 3  | 195508406 | 195508406 | C    | T      | 16  | 0.19 | <i>MUC4</i>     | NM_018406    | Missense        | p.D3349N               | -1.07  | Neutral     | NA   | NA        | 0.842 | possibly damaging |
| CA69 | 21 | 30927384  | 30927384  | C    | T      | 125 | 0.51 | <i>GRIK1</i>    | NM_000830    | Missense        | p.D866N                | -1.32  | Neutral     | 0.15 | Tolerated | 0.001 | benign            |
| CA69 | 22 | 26849318  | 26849318  | A    | G      | 44  | 0.34 | <i>HPS4</i>     | NM_022081    | Missense        | p.F670L                | -4.53  | Deleterious | 0    | Damaging  | 1     | probably damaging |
| CA69 | 6  | 26225762  | 26225762  | T    | G      | 131 | 0.46 | <i>HIST1H3E</i> | NM_003532    | Missense        | p.L127R                | -4.05  | Deleterious | 0    | Damaging  | NA    | NA                |
| CA69 | 13 | 28608329  | 28608329  | A    | T      | 51  | 0.57 | <i>FLT3</i>     | NM_004119    | Missense        | p.L576Q                | -2.28  | Neutral     | 0    | Damaging  | 0.867 | possibly damaging |
| CA69 | 12 | 49448427  | 49448427  | G    | GGGCCC | 84  | 0.14 | <i>MLL2</i>     | NM_003482    | Frame_Shift_Ins | p.P95fs                | NA     | NA          | NA   | NA        | NA    | NA                |
| CA69 | 9  | 117108158 | 117108158 | G    | C      | 27  | 0.37 | <i>AKNA</i>     | NM_030767    | Missense        | p.R1216G               | -3.66  | Deleterious | 0.06 | Tolerated | 0.949 | possibly damaging |
| CA69 | 4  | 156835562 | 156835562 | C    | T      | 74  | 0.32 | <i>TDO2</i>     | NM_005651    | Missense        | p.R272C                | -2.16  | Neutral     | 0.09 | Tolerated | 0.998 | probably damaging |
| CA92 | 19 | 12874555  | 12874555  | G    | A      | 64  | 0.39 | <i>HOOK2</i>    | NM_013312    | Missense        | p.A622V                | -0.7   | Neutral     | 0.11 | Tolerated | 0     | benign            |
| CA92 | 4  | 78650155  | 78650155  | C    | T      | 80  | 0.09 | <i>CNOT6L</i>   | NM_144571    | Missense        | p.D369N                | -4.66  | Deleterious | 0    | Damaging  | 1     | probably damaging |
| CA92 | 8  | 119209973 | 119209973 | T    | C      | 97  | 0.41 | <i>SAMD12</i>   | NM_001101676 | Splice Site     | p.D634sp               | NA     | NA          | NA   | NA        | NA    | NA                |
| CA92 | 1  | 214557043 | 214557043 | C    | T      | 104 | 0.18 | <i>PTPN14</i>   | NM_005401    | Missense        | p.E719K                | -0.61  | Neutral     | 0.69 | Tolerated | 0     | benign            |

|      |    |           |           |   |   |     |      |                 |              |          |          |       |             |      |           |       |                   |
|------|----|-----------|-----------|---|---|-----|------|-----------------|--------------|----------|----------|-------|-------------|------|-----------|-------|-------------------|
| CA92 | 20 | 57288994  | 57288994  | C | A | 32  | 0.09 | <i>NPEPL1</i>   | NM_024663    | Missense | p.H383N  | -6.13 | Deleterious | 0.12 | Tolerated | 1     | probably damaging |
| CA92 | 1  | 1737942   | 1737942   | A | T | 50  | 0.14 | <i>GNBI</i>     | NM_002074    | Missense | p.I80N   | -5.87 | Deleterious | 0.04 | Damaging  | 1     | probably damaging |
| CA92 | 12 | 20858892  | 20858892  | T | C | 67  | 0.25 | <i>SLCO1C1</i>  | NM_001145946 | Missense | p.L94S   | -5.2  | Deleterious | 0.05 | Damaging  | 1     | probably damaging |
| CA92 | X  | 53231109  | 53231109  | G | A | 40  | 0.30 | <i>KDM5C</i>    | NM_004187    | Missense | p.P598L  | -8.75 | Deleterious | 0    | Damaging  | 0.996 | probably damaging |
| CA92 | 9  | 14313482  | 14313482  | T | G | 124 | 0.21 | <i>NFIB</i>     | NM_001190737 | Missense | p.Q10P   | -3.64 | Deleterious | 0.06 | Tolerated | 0.968 | probably damaging |
| CA92 | 1  | 44395863  | 44395863  | C | T | 21  | 0.52 | <i>ST3GAL3</i>  | NM_174965    | Missense | p.R168C  | 0     | Neutral     | 0    | Damaging  | 0     | benign            |
| CA92 | 20 | 45170427  | 45170427  | C | T | 25  | 0.20 | <i>OCSTAMP</i>  | NM_080721    | Missense | p.R396H  | -0.88 | Neutral     | 0.26 | Tolerated | 0.141 | benign            |
| CA92 | 17 | 7748879   | 7748879   | C | T | 45  | 0.16 | <i>KDM6B</i>    | NM_001080424 | Missense | p.R3W    | -1.39 | Neutral     | 0    | Damaging  | 1     | probably damaging |
| CA92 | X  | 15584479  | 15584479  | G | A | 51  | 0.29 | <i>ACE2</i>     | NM_021804    | nonsense | p.R671_  | NA    | NA          | 0.92 | Tolerated | NA    | NA                |
| CA92 | 14 | 103430965 | 103430965 | C | T | 78  | 0.31 | <i>CDC42BPB</i> | NM_006035    | Missense | p.R867H  | -4.4  | Deleterious | 0.03 | Damaging  | 1     | probably damaging |
| CA92 | 6  | 132031946 | 132031946 | T | C | 21  | 0.19 | <i>CTAGE9</i>   | NM_001145659 | Missense | p.Y71C   | -7.62 | Deleterious | 0    | Damaging  | 1     | probably damaging |
| CA97 | 1  | 228481245 | 228481245 | G | A | 30  | 0.33 | <i>OBSCN</i>    | NM_001271223 | Missense | p.V4116M | -0.54 | Neutral     | 0.1  | Tolerated | 0.981 | probably damaging |
| CA97 | 11 | 105775972 | 105775972 | G | A | 24  | 0.29 | <i>GRIA4</i>    | NM_000829    | Missense | p.R368H  | -1.97 | Neutral     | 0.11 | Tolerated | 1     | probably damaging |
| CA97 | 16 | 89652131  | 89652131  | G | A | 17  | 0.47 | <i>CPNE7</i>    | NM_014427    | Missense | p.D315N  | -4.86 | Deleterious | 0    | Damaging  | 1     | probably damaging |
| CA97 | 3  | 156570749 | 156570749 | G | A | 24  | 0.25 | <i>LEKRI</i>    | NM_001004316 | Missense | p.D81N   | -0.69 | Neutral     | NA   | NA        | 0.005 | benign            |
| CA97 | 4  | 17488829  | 17488829  | G | T | 17  | 0.12 | <i>QDPR</i>     | NM_000320    | Missense | p.N220K  | -0.8  | Neutral     | 0.44 | Tolerated | 0.005 | benign            |
| CA97 | 4  | 48384816  | 48384816  | G | A | 19  | 0.32 | <i>SLAIN2</i>   | NM_020846    | Missense | p.R365Q  | -0.12 | Neutral     | 0.48 | Tolerated | 1     | probably damaging |
| CA97 | 9  | 133730371 | 133730371 | A | G | 23  | 0.57 | <i>ABL1</i>     | NM_007313    | Missense | p.N165S  | -4.66 | Deleterious | 0    | Damaging  | 0.763 | possibly damaging |

**Table S3. Recurrent gene mutations identified by whole exome sequencing and whole genome sequencing**

#Genes labeled in black have been found mutated in B-ALL, in blue found mutated in other cancers or leukemia, in red not found mutated in cancer or leukemia

\*Numbers in the parentheses indicate the recurrent times of 2 or more than 2.

| Mutation count | Gene#       | Chromosome | Transcription ID | Strand | Amino Acid Change*                                                                             | Patients with mutations*                                                                                           |
|----------------|-------------|------------|------------------|--------|------------------------------------------------------------------------------------------------|--------------------------------------------------------------------------------------------------------------------|
| 27             | <i>NRAS</i> | 1          | NM_002524        | -      | p.G12A(2),p.G12C(2),p.G12D(6),p.G12S(4),p.G12V,p.G13D(6),p.G13V(2),<br>p.Q61H(2),p.Q61K,p.Q61L | A24,A27,A42,A50,A55,A68,A71,A72,A85,AC04,AC14(2),B02,B15,<br>C03,C100,C102,C13,C21,C22,C45,C51,C56,C59,C63,C80,C98 |
| 15             | <i>KRAS</i> | 12         | NM_033360        | -      | p.A146T,p.A59E,p.G12A,p.G12D(2),p.G12R,p.G12S(3),p.G12V(2),<br>p.G13D(2),p.I36M,p.K117N        | A04,A41,A52,A88,A90,AC06,AC10,C02,C17,C55,C57,C58,C65,C85,C98                                                      |
| 15             | <i>PAX5</i> | 9          | NM_016734        | -      | p.E201fs,p.E205_,p.L58F(3),p.N29K,p.P80R(3),p.R140Q,p.V26fs,<br>p.V26G(3),p.Y7C                | A01,A11,A27(2),A32,A51,A52,A53,A78,AC14,B12,B13,B15,B16,C66                                                        |

|    |               |    |              |   |                                                                                                                                                          |                                                          |
|----|---------------|----|--------------|---|----------------------------------------------------------------------------------------------------------------------------------------------------------|----------------------------------------------------------|
| 15 | <i>SETD2</i>  | 3  | NM_014159    | - | p.A2357fs,p.F1454fs,p.F1664Y,p.K2123fs,p.K2511fs,p.K2511Q,<br>p.KKDSV1711fs,p.N719H,p.Q1734_p.S1531del,p.S1572_p.S1838fs,<br>p.T2101fs,p.Y1472_p.Y2523fs | A01,A17,A24(3),A39,A53,A64(2),A65(2),AC10(2),B06,C69     |
| 14 | <i>MLL2</i>   | 12 | NM_003482    | - | p.5494_5495insL,p.E3214fs,p.G2715fs,p.G3465fs,p.N5447fs,p.P480fs,p.P95f<br>s,p.Q3961fs,p.Q836fs,p.R1528fs,p.R2789fs,p.R2801_p.T1496fs,p.T3027fs          | A06,A07,A08,A09,A19,A32,A33,A37,A54,A88,C38,C39,C59,CA69 |
| 14 | <i>MUC4</i>   | 3  | NM_018406    | - | p.A1929V,p.A3481V,p.D3349N,p.G3509D(2),p.G4421D,p.H1906P,p.L2899<br>V,p.L2902F,p.L5383P,p.P1680S(2),p.S1653I,p.S1927Y                                    | A46,A51,A53(3),A62,A65,A68,C48,C61,C64,C69,C98,CA69      |
| 13 | <i>FLT3</i>   | 13 | NM_004119    | - | p.D593_F594delinsEC,p.D835A,p.D835Y,p.D839G,p.I836L,p.L576P,p.L576<br>Q(2),p.V491L(2),p.V592D,p.Y591D,p.Y842C                                            | A14,A17,A25,A36,A43,A52,C101,C102,C61(2),C71,C90,CA69    |
| 10 | <i>TTN</i>    | 2  | NM_001267550 | - | p.E13766G,p.G8481R,p.K13332fs,p.R17618C,p.R20823H,p.R24742H,p.R49<br>15C,p.R6203K,p.S5306del,p.T3743M                                                    | A08,A11,A21,A27,A50,A83,B16,C17,C41,C81                  |
| 9  | <i>PTPN11</i> | 12 | NM_002834    | + | p.A72T,p.A72V,p.D61G,p.E69K,p.E76K,p.G503R,p.S502A,p.T507K,p.T73I                                                                                        | A20,A27,A52,A93,C02,C25,C44,C47,C96                      |
| 6  | <i>EZH2</i>   | 7  | NM_004456    | - | p.G155R,p.G738fs,p.I131L,p.K568E,p.N130del,p.S695A                                                                                                       | A08(2),A20,A83,C47(2)                                    |
| 6  | <i>RUNX1</i>  | 21 | NM_001754    | - | p.I337fs,p.L71fs,p.R166_(2),p.R201_p.S114fs                                                                                                              | A05,A12,A34,A60,A62,AC11                                 |
| 6  | <i>ZFX4</i>   | 8  | NM_024721    | + | p.D1536N,p.G3013R,p.L2507F,p.M2936K,p.Q2331E,p.R1398C                                                                                                    | A29,A76,C41,C58,C59,C71                                  |
| 5  | <i>ABL1</i>   | 9  | NM_007313    | + | p.E30D,p.E374G,p.E472G,p.N165S,p.T296N                                                                                                                   | A52,AC11,C36(2),CA97                                     |
| 5  | <i>BRAF</i>   | 7  | NM_004333    | - | p.D594E,p.K601E(2),p.N581Y,p.V600E                                                                                                                       | A73,A93,C15,C56,C77                                      |
| 5  | <i>CHD4</i>   | 12 | NM_001273    | - | p.E1094K,p.I989T,p.N26D,p.R1162P,p.R1899W                                                                                                                | A66,A89,C40,C69,C71                                      |
| 5  | <i>CREBBP</i> | 16 | NM_004380    | - | p.C1421F,p.I1084fs,p.I1453fs,p.Q1209fs,p.Y1539D                                                                                                          | A06,A32,A37,C08,C41                                      |
| 5  | <i>NF1</i>    | 17 | NM_001042492 | + | p.G2334D,p.L626fs,p.T676fs,p.V1019fs,p.W2225_                                                                                                            | A01,A07,A08,A81,C77                                      |
| 5  | <i>USH2A</i>  | 1  | NM_206933    | - | p.D1788G,p.F1110V,p.P3590L,p.R3134Q,p.V49F                                                                                                               | A08,A32,C13,C69,C71                                      |
| 4  | <i>ANO5</i>   | 11 | NM_213599    | + | p.C601F,p.L610F,p.R160H,p.R484H                                                                                                                          | A08,A50,B15,C71                                          |
| 4  | <i>ASXL1</i>  | 20 | NM_015338    | + | p.G642fs,p.L765fs,p.Q512_p.W1037_                                                                                                                        | A05,A20,A23(2)                                           |
| 4  | <i>CDKN2A</i> | 9  | NM_001195132 | - | p.D153fs,p.E10fs,p.M1K,p.R58_                                                                                                                            | A54,A71,C40,C58                                          |
| 4  | <i>CGREF1</i> | 2  | NM_001166239 | - | p.EGDAPGPRGEAGGQAEA248del,p.G243E(3)                                                                                                                     | A67,A96,C90,C95                                          |
| 4  | <i>DCHS1</i>  | 11 | NM_003737    | - | p.33_34insL,p.A2095E,p.P500R,p.T1733M                                                                                                                    | A32,A82,B06,C70                                          |
| 4  | <i>DST</i>    | 6  | NM_001144769 | - | p.A5251V,p.A90V,p.L2591H,p.R4599H                                                                                                                        | A27,A32,C43,C69                                          |
| 4  | <i>EPHA6</i>  | 3  | NM_001080448 | + | p.D546E,p.G108A,p.L582P,p.P822L                                                                                                                          | A30,A38,A85,A96                                          |
| 4  | <i>ETV6</i>   | 12 | NM_001987    | + | p.C338Y,p.H317fs,p.R359_p.R55fs                                                                                                                          | A05,A96,C23,C43                                          |
| 4  | <i>FAT3</i>   | 11 | NM_001008781 | + | p.A3911V,p.Q4377_p.R1011W,p.R1658C                                                                                                                       | A16,A76,C70,C71                                          |
| 4  | <i>GNBI</i>   | 1  | NM_002074    | - | p.G116R,p.I80N(2),p.I80S                                                                                                                                 | A29,A73,C40,CA92                                         |
| 4  | <i>GRM5</i>   | 11 | NM_001143831 | - | p.A758V,p.F137L,p.G964D,p.P1165Q                                                                                                                         | A08,A77,C101,C98                                         |
| 4  | <i>IKZF1</i>  | 7  | NM_006060    | + | p.E16fs,p.M459fs,p.R143Q,p.S17fs                                                                                                                         | A01,A56,A70,A87                                          |

|   |                |    |              |   |                                                                 |                  |
|---|----------------|----|--------------|---|-----------------------------------------------------------------|------------------|
| 4 | <i>MXRA5</i>   | X  | NM_015419    | - | p.E893K,p.P1841H,p.T2430M,p.T596A                               | A32,A43,B18,C70  |
| 4 | <i>PCLO</i>    | 7  | NM_033026    | - | p.P3595H,p.P99L,p.R5085Q,p.S78_                                 | A32,A78,A87,C71  |
| 4 | <i>SVIL</i>    | 10 | NM_021738    | - | p.A1465V,p.E1835V,p.L1374R,p.S620L                              | A57,AC10,C61,C71 |
| 4 | <i>THBS2</i>   | 6  | NM_003247    | - | p.A232V,p.E664A,p.E664K,p.P906T                                 | C18,C30,C31,C70  |
| 4 | <i>UBA2</i>    | 19 | NM_005499    | + | p.C413_,p.L403F,p.R122Q,p.S535fs                                | B04,C34,C81,C95  |
| 4 | <i>ZC3H18</i>  | 16 | NM_144604    | + | p.K823_,p.R436_,p.R701_,p.T677fs                                | A85,A93,C23,C31  |
| 4 | <i>ZEB2</i>    | 2  | NM_014795    | - | p.H1038R(4)                                                     | A50,A51,AC09,C37 |
| 3 | <i>ADCY8</i>   | 8  | NM_001115    | - | p.L89M,p.R611W,p.R930_                                          | A30,A95,AC16     |
| 3 | <i>ANK3</i>    | 10 | NM_020987    | - | p.R1023H,p.S919L,p.T109K                                        | A35,A95,C74      |
| 3 | <i>ASTN2</i>   | 9  | NM_014010    | - | p.A244T,p.R1279_,p.R285W                                        | A24,B17,C102     |
| 3 | <i>ATXN3</i>   | 14 | NM_004993    | - | p.306_306G>EQQQQQQQQQQQQR,p.306_306G>EQQQQQQQQQQQQ<br>R,p.T136A | A95,C91,C94      |
| 3 | <i>BCORL1</i>  | X  | NM_021946    | + | p.Q565_,p.S706_,p.V1049fs                                       | A12,A77,C83      |
| 3 | <i>BCR</i>     | 22 | NM_004327    | + | p.A170V,p.A249G,p.A677T                                         | A32,A64,C56      |
| 3 | <i>C3</i>      | 19 | NM_000064    | - | p.A1239D,p.P292T,p.R1548Q                                       | A33,A52,B01      |
| 3 | <i>CACNA1E</i> | 1  | NM_001205293 | + | p.H923Y,p.R2077H,p.R2157W                                       | A05,A32,C71      |
| 3 | <i>CELSR1</i>  | 22 | NM_014246    | - | p.A1233V,p.A2137V,p.Q2125H                                      | A62,A83,C71      |
| 3 | <i>DNAH17</i>  | 17 | NM_173628    | - | p.D2053G,p.I204M,p.R2922C                                       | A94,C70(2)       |
| 3 | <i>DNAH3</i>   | 16 | NM_017539    | - | p.A1612D,p.M4058V,p.N2001K                                      | A61,C34,C71      |
| 3 | <i>ERBB4</i>   | 2  | NM_005235    | - | p.E141_,p.N504K,p.R1045K                                        | A11,A29,C08      |
| 3 | <i>EVISL</i>   | 19 | NM_001159944 | + | p.A350T,p.A538fs,p.E586K                                        | C23,C35,C36      |
| 3 | <i>FAM151A</i> | 1  | NM_176782    | - | p.C3F,p.G503E,p.R168Q                                           | C34,C70,C86      |
| 3 | <i>FAM208B</i> | 10 | NM_017782    | + | p.C1228W,p.F2198V,p.M638I                                       | A01,C69,CA69     |
| 3 | <i>FLNC</i>    | 7  | NM_001458    | + | p.A1318T,p.G2039R,p.R420W                                       | A77,C55,C69      |
| 3 | <i>FREMI</i>   | 9  | NM_144966    | - | p.E1344G,p.S1485R,p.T867I                                       | C64,C70,C82      |
| 3 | <i>FRG2C</i>   | 3  | NM_001124759 | + | p.D252E,p.S81R,p.T30S                                           | A55,C44,C78      |
| 3 | <i>GREB1</i>   | 2  | NM_014668    | + | p.I861T,p.S1214L,p.V991I                                        | A32,A95,C69      |
| 3 | <i>HMCN1</i>   | 1  | NM_031935    | + | p.E3443D,p.R3795Q,p.S928L                                       | A08,A27,B15      |
| 3 | <i>JAK2</i>    | 9  | NM_004972    | + | p.R683G,p.R683S,p.T875N                                         | A46(2),A66       |
| 3 | <i>KDM5C</i>   | X  | NM_004187    | - | p.I648fs,p.L526R,p.P598L                                        | A14(2),CA92      |
| 3 | <i>LAMA1</i>   | 18 | NM_005559    | - | p.G2448C,p.R162H,p.R2084W                                       | A21,C23,C44      |
| 3 | <i>LNPI</i>    | 3  | NM_001085451 | + | p.66_67insRRHSHEDQEFRCP,p.R68fs,p.R79fs                         | C91,C93,C94      |
| 3 | <i>LPHN2</i>   | 1  | NM_012302    | + | p.G787E,p.T67M,p.V320A                                          | A07,A43,C01      |

|   |                 |    |              |   |                                                  |              |
|---|-----------------|----|--------------|---|--------------------------------------------------|--------------|
| 3 | <i>LRRD1</i>    | 7  | NM_001161528 | - | p.N474K,p.P60L,p.R856C                           | C59,C70(2)   |
| 3 | <i>MET</i>      | 7  | NM_001127500 | + | p.E254Q,p.G1183fs,p.L211W                        | A17,C20,C70  |
| 3 | <i>MPDZ</i>     | 9  | NM_003829    | - | p.A1787V,p.G1200R,p.T1942M                       | A46,A90,C23  |
| 3 | <i>MUC16</i>    | 19 | NM_024690    | - | p.G1254R,p.V4948L,p.V769I                        | A23,A66,C36  |
| 3 | <i>MYC</i>      | 8  | NM_002467    | + | p.P74Q,p.T73I,p.T73N                             | A32,A33,A54  |
| 3 | <i>MYO3B</i>    | 2  | NM_138995    | + | p.G143S,p.H316L,p.Q362_                          | C19,C20,C69  |
| 3 | <i>NBPF10</i>   | 1  | NM_001039703 | + | p.R54Q(2),p.Y124N                                | A71,C46,C65  |
| 3 | <i>OBSCN</i>    | 1  | NM_001271223 | + | p.G7622S,p.R3109C,p.V4116M                       | A68,C69,CA97 |
| 3 | <i>PIMI1</i>    | 6  | NM_001243186 | + | p.E226K,p.G119D,p.N109D                          | A32(2),C70   |
| 3 | <i>PKHD1</i>    | 6  | NM_138694    | - | p.G2224_ p.R2926Q,p.W2383L                       | A01,A08,C93  |
| 3 | <i>PRICKLE2</i> | 3  | NM_198859    | - | p.A698T,p.F645S,p.Q613P                          | A25,A56,C83  |
| 3 | <i>RIMS1</i>    | 6  | NM_014989    | + | p.I909M,p.R290W,p.R903Q                          | A52,C76,C81  |
| 3 | <i>RIT1</i>     | 1  | NM_001256821 | - | p.F99L,p.M107I,p.M107V                           | A36,A85,C41  |
| 3 | <i>RPIL1</i>    | 8  | NM_178857    | - | p.1341_1342insKTEEGLQEEGVQLEGT,p.E1340G,p.M1670L | A81,A95,AC14 |
| 3 | <i>RYR2</i>     | 1  | NM_001035    | + | p.G7S,p.R296_ p.V203M                            | A36,A40,C70  |
| 3 | <i>SPEF2</i>    | 5  | NM_024867    | + | p.D634fs,p.E965_ p.K195fs                        | A79,B06,C02  |
| 3 | <i>SPRR3</i>    | 1  | NM_005416    | + | p.EPGCTKVP95del(3)                               | A90,C44,C90  |
| 3 | <i>SYNE1</i>    | 6  | NM_182961    | - | p.F7614fs,p.N4560H,p.R1537_                      | A40,A94,C35  |
| 3 | <i>TMTC2</i>    | 12 | NM_152588    | + | p.I33del,p.L110H,p.T390M                         | A08,A59,A87  |
| 3 | <i>TP53</i>     | 17 | NM_001126112 | - | p.282_283insG,p.R175H,p.R342_                    | A08,A39,AC16 |
| 3 | <i>UPP2</i>     | 2  | NM_001135098 | + | p.G122S,p.K258E,p.R369W                          | A85,A90,C70  |
| 3 | <i>XBPI1</i>    | 22 | NM_001079539 | - | p.G160fs,p.L169fs(2)                             | A15,A17,A26  |
| 3 | <i>XDH</i>      | 2  | NM_000379    | - | p.A1259S,p.A432V,p.W994_                         | A72,B15,C56  |
| 3 | <i>ZNF804B</i>  | 7  | NM_181646    | + | p.P458S,p.P534L,p.T1149K                         | A43,C39,C65  |
| 3 | <i>DSPP</i>     | 4  | NM_014208    | + | p.NSSDSS1029del,p.SDSSNS1025del,p.SNE1231del     | A58,A59,C65  |
| 2 | <i>ABCA13</i>   | 7  | NM_152701    | + | p.F2271V,p.K513T                                 | A75,C87      |
| 2 | <i>ADAM29</i>   | 4  | NM_001130704 | + | p.N645H,p.R696_                                  | A40,A84      |
| 2 | <i>ADARB1</i>   | 21 | NM_015833    | + | p.D171N,p.E733K                                  | AC09,C25     |
| 2 | <i>AFAP1</i>    | 4  | NM_001134647 | - | p.A670V,p.T204M                                  | A09,A54      |
| 2 | <i>AGAP3</i>    | 7  | NM_031946    | + | p.E391G,p.R374fs                                 | A53,C86      |
| 2 | <i>AHNAK2</i>   | 14 | NM_138420    | - | p.A2623T,p.R5502Q                                | B17,C71      |
| 2 | <i>ANKRD36</i>  | 2  | NM_001164315 | + | p.I368T,p.L217del                                | A88,C69      |
| 2 | <i>ANKS1A</i>   | 6  | NM_015245    | + | p.42_42G>GGG,p.S661L                             | A78,C71      |

|   |                 |    |              |   |                           |          |
|---|-----------------|----|--------------|---|---------------------------|----------|
| 2 | <i>APC2</i>     | 19 | NM_005883    | + | p.A556T,p.S929N           | A20,B17  |
| 2 | <i>ARHGEF28</i> | 5  | NM_001080479 | + | p.L1731F,p.R634Q          | A75,C70  |
| 2 | <i>ARHGEF37</i> | 5  | NM_001001669 | + | p.P560L,p.R547C           | A01,A06  |
| 2 | <i>ASTN1</i>    | 1  | NM_004319    | - | p.A353V,p.R880Q           | A50,C71  |
| 2 | <i>ASXL2</i>    | 2  | NM_018263    | - | p.Q635_p.T1365I           | A27,C61  |
| 2 | <i>ATP2C2</i>   | 16 | NM_014861    | + | p.E224K,p.V441F           | A09,C88  |
| 2 | <i>ATRX</i>     | X  | NM_000489    | - | p.Q1105_p.Y1667fs         | A83,A90  |
| 2 | <i>BAHCC1</i>   | 17 | NM_001080519 | + | p.P626L,p.T2545M          | A33,A68  |
| 2 | <i>BAI3</i>     | 6  | NM_001704    | + | p.G323R,p.L396I           | A32,A65  |
| 2 | <i>BIRC6</i>    | 2  | NM_016252    | + | p.L3396R,p.P3935L         | A42,C71  |
| 2 | <i>BMPR2</i>    | 2  | NM_001204    | + | p.S350I,p.T740A           | A33,A75  |
| 2 | <i>BTBD9</i>    | 6  | NM_052893    | - | p.G321D,p.M355V           | A32,C71  |
| 2 | <i>BTG1</i>     | 12 | NM_001731    | - | p.103_103T>RP,p.E101fs    | AC04,C43 |
| 2 | <i>C16orf3</i>  | 16 | NM_001214    | - | p.51_52insAACPVGCP,p.V44A | A55,C99  |
| 2 | <i>C1orf127</i> | 1  | NM_001170754 | - | p.AATTPS1161del,p.N301S   | A18,C70  |
| 2 | <i>CACNA1H</i>  | 16 | NM_021098    | + | p.R1217H,p.R2257Q         | A59,C47  |
| 2 | <i>CACNA1I</i>  | 22 | NM_021096    | + | p.R1456H,p.R452C          | A47,C41  |
| 2 | <i>CCDC157</i>  | 22 | NM_001017437 | + | p.P690S(2)                | C79,C94  |
| 2 | <i>CCDC180</i>  | 9  | NM_020893    | + | p.915_915E>EEE(2)         | C70,C89  |
| 2 | <i>CD3EAP</i>   | 19 | NM_012099    | + | p.A376V,p.M339I           | C17,C28  |
| 2 | <i>CDC42BPB</i> | 14 | NM_006035    | - | p.R1203K,p.R867H          | B15,CA92 |
| 2 | <i>CDC42BPG</i> | 11 | NM_017525    | - | p.R977C,p.V1432L          | A41,C70  |
| 2 | <i>CDH13</i>    | 16 | NM_001220488 | + | p.A643V,p.T393M           | A56,A64  |
| 2 | <i>CDH9</i>     | 5  | NM_016279    | - | p.E65V,p.P694H            | C13,C64  |
| 2 | <i>CDK16</i>    | X  | NM_001170460 | + | p.G135C,p.T459S           | A70,C27  |
| 2 | <i>CDK5RAP2</i> | 9  | NM_018249    | - | p.G1770V,p.I81M           | C20,C31  |
| 2 | <i>CEP170B</i>  | 14 | NM_001112726 | + | p.P1120R,p.P214S          | A79,C71  |
| 2 | <i>CEP57L1</i>  | 6  | NM_001083535 | + | p.K274fs,p.K417R          | A56,C69  |
| 2 | <i>CHD2</i>     | 15 | NM_001271    | + | p.K1389fs,p.M1388fs       | A40,A89  |
| 2 | <i>CHST9</i>    | 18 | NM_031422    | - | p.E88D,p.R42K             | C70,C86  |
| 2 | <i>CILP2</i>    | 19 | NM_153221    | + | p.R1111_p.R976Q           | A93,C33  |
| 2 | <i>CLDN22</i>   | 4  | NM_001111319 | - | p.T144M(2)                | A37,C21  |
| 2 | <i>CNTN4</i>    | 3  | NM_175607    | + | p.R564Q,p.V530M           | A50,A90  |



|   |                 |    |              |   |                      |          |
|---|-----------------|----|--------------|---|----------------------|----------|
| 2 | <i>CNTNAP5</i>  | 2  | NM_130773    | + | p.E331K,p.V793I      | A95,A96  |
| 2 | <i>COL4A2</i>   | 13 | NM_001846    | + | p.G1332R,p.P1479L    | A20,A90  |
| 2 | <i>COL5A2</i>   | 2  | NM_000393    | - | p.G612R,p.R1136_     | C01,C23  |
| 2 | <i>COL6A3</i>   | 2  | NM_004369    | - | p.A1356V,p.P2748S    | A78,C96  |
| 2 | <i>CRISPLD1</i> | 8  | NM_031461    | + | p.A393S,p.R222Q      | A44,C20  |
| 2 | <i>CSMD3</i>    | 8  | NM_198123    | - | p.Q941_ p.S2192I     | A13,C78  |
| 2 | <i>CSNK1A1L</i> | 13 | NM_145203    | - | p.Q291E,p.T299M      | A39,C66  |
| 2 | <i>CTAGE9</i>   | 6  | NM_001145659 | - | p.L398V,p.Y71C       | C70,CA92 |
| 2 | <i>CTNNA3</i>   | 10 | NM_001127384 | - | p.H881Q,p.L170F      | A82,C31  |
| 2 | <i>CXCR7</i>    | 2  | NM_020311    | + | p.R162H,p.S242F      | A36,C23  |
| 2 | <i>DDC</i>      | 7  | NM_000790    | - | p.A106V,p.G96R       | A23,A72  |
| 2 | <i>DDX3X</i>    | X  | NM_001356    | + | p.D354N,p.I401fs     | A24,C70  |
| 2 | <i>DENND2A</i>  | 7  | NM_015689    | - | p.P697S,p.R688_      | A11,A90  |
| 2 | <i>DENND5A</i>  | 11 | NM_015213    | - | p.C383W,p.T26A       | A77,C71  |
| 2 | <i>DGKQ</i>     | 4  | NM_001347    | - | p.A934V,p.G30V       | C71,C85  |
| 2 | <i>DLG5</i>     | 10 | NM_004747    | - | p.A1007T,p.R1501H    | A20,C71  |
| 2 | <i>DMD</i>      | X  | NM_004006    | - | p.C1267Y,p.M975L     | A07,A40  |
| 2 | <i>DNAH5</i>    | 5  | NM_001369    | - | p.R4199H,p.V3399I    | A03,A15  |
| 2 | <i>DNAH6</i>    | 2  | NM_001370    | + | p.A281D,p.G795S      | AC14,C86 |
| 2 | <i>DNAH8</i>    | 6  | NM_001206927 | + | p.P4035S,p.S2819L    | A28,C71  |
| 2 | <i>DNAH9</i>    | 17 | NM_001372    | + | p.L836F,p.N1568T     | A01,C70  |
| 2 | <i>DNHD1</i>    | 11 | NM_144666    | + | p.P271H,p.R1165C     | A46,C70  |
| 2 | <i>DOCK5</i>    | 8  | NM_024940    | + | p.E1387K,p.R1121W    | A19,B15  |
| 2 | <i>DPYD</i>     | 1  | NM_000110    | - | p.58_59insGI,p.T779N | A65,C70  |
| 2 | <i>DRD2</i>     | 11 | NM_000795    | - | p.V154I,p.V255I      | B04,C70  |
| 2 | <i>DRD5</i>     | 4  | NM_000798    | + | p.K290del,p.P330L    | A57,C69  |
| 2 | <i>EDNRA</i>    | 4  | NM_001957    | + | p.R419Q,p.T39I       | A74,C59  |
| 2 | <i>EPHA10</i>   | 1  | NM_001099439 | - | p.R205H,p.V965M      | A53,AC16 |
| 2 | <i>EPHA7</i>    | 6  | NM_004440    | - | p.A848T,p.R371W      | A77,C17  |
| 2 | <i>EPHA8</i>    | 1  | NM_020526    | + | p.G220E,p.V445I      | A61,C93  |
| 2 | <i>ETV1</i>     | 7  | NM_004956    | - | p.G407E,p.R391H      | C30,C58  |
| 2 | <i>FAM109B</i>  | 22 | NM_001002034 | + | p.P216R,p.R239Q      | AC10,C69 |
| 2 | <i>FAM13C</i>   | 10 | NM_198215    | - | p.F307I,p.R144Q      | C102,C83 |

|   |                  |    |              |   |                           |          |
|---|------------------|----|--------------|---|---------------------------|----------|
| 2 | <i>FAM186A</i>   | 12 | NM_001145475 | - | p.H292fs,p.K985N          | A44,C70  |
| 2 | <i>FARS2</i>     | 6  | NM_006567    | + | p.E219fs,p.Q44R           | A16,C69  |
| 2 | <i>FBRSL1</i>    | 12 | NM_001142641 | + | p.P686L,p.T63A            | A78,C71  |
| 2 | <i>FGFR3</i>     | 4  | NM_001163213 | + | p.R252W,p.R399H           | C36,C57  |
| 2 | <i>FLNA</i>      | X  | NM_001110556 | - | p.H326Q,p.V2007M          | A84,C71  |
| 2 | <i>FOXB2</i>     | 9  | NM_001013735 | + | p.R51C,p.S242F            | A18,A50  |
| 2 | <i>FRAS1</i>     | 4  | NM_025074    | + | p.R3768C,p.V537M          | A96,C84  |
| 2 | <i>FSIP2</i>     | 2  | NM_173651    | + | p.E3304K,p.T1981M         | A38,C71  |
| 2 | <i>GAB3</i>      | X  | NM_001081573 | - | p.S218_,p.S574R           | A54,C02  |
| 2 | <i>GOLGA4</i>    | 3  | NM_001172713 | + | p.L537P,p.R99Q            | C71,C83  |
| 2 | <i>GPC5</i>      | 13 | NM_004466    | + | p.A283V,p.M215N           | A40,A90  |
| 2 | <i>GPR137C</i>   | 14 | NM_001099652 | + | p.L331fs,p.S242C          | A21,C25  |
| 2 | <i>GPR162</i>    | 12 | NM_019858    | + | p.R496W,p.R559H           | A14,A53  |
| 2 | <i>GPR45</i>     | 2  | NM_007227    | + | p.V210I,p.V59M            | A36,C65  |
| 2 | <i>GREB1L</i>    | 18 | NM_001142966 | + | p.G792A,p.M95fs           | A33,C71  |
| 2 | <i>GRM7</i>      | 3  | NM_181874    | + | p.G64R,p.R191H            | A32,A84  |
| 2 | <i>GRXCR1</i>    | 4  | NM_001080476 | + | p.A21V,p.R14W             | A66,C02  |
| 2 | <i>GSE1</i>      | 16 | NM_014615    | + | p.342_342E>ERERERE,p.A24T | C20,C69  |
| 2 | <i>HCN2</i>      | 19 | NM_001194    | + | p.M425I,p.R659S           | A25,A93  |
| 2 | <i>HDAC5</i>     | 17 | NM_001015053 | - | p.E1115_,p.V449M          | A65,C78  |
| 2 | <i>HEATR4</i>    | 14 | NM_001220484 | - | p.D525E,p.P964L           | A46,C70  |
| 2 | <i>HIP1R</i>     | 12 | NM_003959    | + | p.H59R,p.R835Q            | A03,C69  |
| 2 | <i>HIST1H2AG</i> | 6  | NM_021064    | + | p.Q105*,p.V108fs          | C24,C30  |
| 2 | <i>HLF</i>       | 17 | NM_002126    | + | p.I284V,p.R268H           | C58,C71  |
| 2 | <i>HS3ST4</i>    | 16 | NM_006040    | + | p.A294T,p.E307K           | C32,C77  |
| 2 | <i>HYDIN</i>     | 16 | NM_001270974 | - | p.R650H,p.V1718M          | C71,C77  |
| 2 | <i>IDH1</i>      | 2  | NM_005896    | - | p.R132C(2)                | A44,A88  |
| 2 | <i>IGFN1</i>     | 1  | NM_001164586 | + | p.R2891W,p.T3222I         | A40,A95  |
| 2 | <i>IGSF9B</i>    | 11 | NM_001277285 | - | p.A1389D,p.P353L          | A32,C100 |
| 2 | <i>IL1RAPL1</i>  | X  | NM_014271    | + | p.D399N,p.R297Q           | A06,B03  |
| 2 | <i>IL1RL1</i>    | 2  | NM_016232    | + | p.I131M,p.T195M           | A90,C70  |
| 2 | <i>INSRR</i>     | 1  | NM_014215    | - | p.A164T,p.V27A            | A01,C34  |
| 2 | <i>JAK3</i>      | 19 | NM_000215    | - | p.M511I,p.V836M           | A05,A47  |

|   |                   |    |              |   |                          |          |
|---|-------------------|----|--------------|---|--------------------------|----------|
| 2 | <i>JMJD1C</i>     | 10 | NM_032776    | - | p.I862V,p.R968W          | A25,C71  |
| 2 | <i>JMY</i>        | 5  | NM_152405    | + | p.G466D,p.R744H          | A06,C77  |
| 2 | <i>JPH2</i>       | 20 | NM_020433    | - | p.A194T,p.E121D          | C33,C74  |
| 2 | <i>KCNH3</i>      | 12 | NM_012284    | + | p.489_490insS,p.T304I    | A76,C90  |
| 2 | <i>KCNMA1</i>     | 10 | NM_001161352 | - | p.L902F,p.S900F          | A05,C97  |
| 2 | <i>KCNT2</i>      | 1  | NM_198503    | - | p.G246R,p.R190H          | A32,C65  |
| 2 | <i>KCNV1</i>      | 8  | NM_014379    | - | p.D148N,p.S180I          | A32,C23  |
| 2 | <i>KDM4E</i>      | 11 | NM_001161630 | + | p.G134D,p.Y300F          | A51,C71  |
| 2 | <i>KIAA1045</i>   | 9  | NM_015297    | + | p.R225H,p.R297Q          | A63,C70  |
| 2 | <i>KIAA1109</i>   | 4  | NM_015312    | + | p.N3353D,p.P192R         | A09,C70  |
| 2 | <i>KIAA1958</i>   | 9  | NM_133465    | + | p.T394P,p.Y138F          | C34,C70  |
| 2 | <i>KIF26A</i>     | 14 | NM_015656    | + | p.P1095A,p.R1222fs       | A51,C71  |
| 2 | <i>KLHDC4</i>     | 16 | NM_017566    | - | p.K256Q,p.L69H           | A53,C71  |
| 2 | <i>KNDC1</i>      | 10 | NM_152643    | + | p.G116R,p.R1248H         | C23,C67  |
| 2 | <i>LAMA5</i>      | 20 | NM_005560    | - | p.E2291K,p.G3152S        | A96,C70  |
| 2 | <i>LAMB2</i>      | 3  | NM_002292    | - | p.A910S,p.T1221M         | A18,C55  |
| 2 | <i>LAMC3</i>      | 9  | NM_006059    | + | p.A854T,p.R915W          | A62,C71  |
| 2 | <i>LEKR1</i>      | 3  | NM_001004316 | + | p.A411T,p.D81N           | C70,CA97 |
| 2 | <i>LPHN3</i>      | 4  | NM_015236    | + | p.N337K,p.S978_          | C81,C86  |
| 2 | <i>LRP1B</i>      | 2  | NM_018557    | - | p.3147_3148insP,p.Q3140E | C35,C83  |
| 2 | <i>LRP2</i>       | 2  | NM_004525    | - | p.G2351S,p.T1498M        | A34,C71  |
| 2 | <i>LRRC15</i>     | 3  | NM_001135057 | - | p.R209W,p.R382H          | A84,C71  |
| 2 | <i>LY75-CD302</i> | 2  | NM_001198759 | - | p.D783G,p.R772S          | A04,A40  |
| 2 | <i>MACF1</i>      | 1  | NM_012090    | + | p.R1373H,p.V3109I        | B01,C71  |
| 2 | <i>MAPT</i>       | 17 | NM_001123066 | + | p.G109V,p.V371I          | A02,C96  |
| 2 | <i>MCAM</i>       | 11 | NM_006500    | - | p.T71M,p.V346I           | A68,C31  |
| 2 | <i>MDN1</i>       | 6  | NM_014611    | - | p.R4289C,p.R5499Q        | C25,C83  |
| 2 | <i>MEGF9</i>      | 9  | NM_001080497 | - | p.AA30del,p.E435G        | AC16,C69 |
| 2 | <i>MGA</i>        | 15 | NM_001080541 | + | p.D536fs,p.R903fs        | A17,B04  |
| 2 | <i>MKI67</i>      | 10 | NM_002417    | - | p.S2941G,p.T1176M        | C41,C70  |
| 2 | <i>MMP13</i>      | 11 | NM_002427    | - | p.P447H,p.R310H          | A09,C88  |
| 2 | <i>MS4A2</i>      | 11 | NM_000139    | + | p.R217H,p.Y125C          | AC11,C69 |
| 2 | <i>MTOR</i>       | 1  | NM_004958    | - | p.A1459P,p.W1449R        | A88,B15  |

|   |                 |    |              |   |                       |          |
|---|-----------------|----|--------------|---|-----------------------|----------|
| 2 | <i>MUC17</i>    | 7  | NM_001040105 | + | p.E4270K,p.T4115M     | A53,B01  |
| 2 | <i>MYH7B</i>    | 20 | NM_020884    | + | p.A250fs,p.G245R      | A81,C77  |
| 2 | <i>MYO15A</i>   | 17 | NM_016239    | + | p.A597V,p.L2727P      | C69,C74  |
| 2 | <i>MYO7B</i>    | 2  | NM_001080527 | + | p.R1758Q,p.R367Q      | A01,C70  |
| 2 | <i>NAALADL2</i> | 3  | NM_207015    | + | p.A683T,p.E618_       | A08,A32  |
| 2 | <i>NCBP2</i>    | 3  | NM_007362    | - | p.R112H(2)            | B13,C61  |
| 2 | <i>NCKAP5</i>   | 2  | NM_207363    | - | p.G569D,p.L872I       | A32,A66  |
| 2 | <i>NEK6</i>     | 9  | NM_001145001 | + | p.G226A,p.V194M       | A46,C69  |
| 2 | <i>NFIB</i>     | 9  | NM_001190737 | - | p.Q10P,p.S264P        | A32,CA92 |
| 2 | <i>NRXN1</i>    | 2  | NM_001135659 | - | p.A1424D,p.A165T      | A77,C72  |
| 2 | <i>NUP107</i>   | 12 | NM_020401    | + | p.S108R,p.Y296_       | A46,C72  |
| 2 | <i>NUP210L</i>  | 1  | NM_207308    | - | p.A976T,p.H1115Y      | B15,C69  |
| 2 | <i>OPLAH</i>    | 8  | NM_017570    | - | p.E1274V,p.P1248T     | A90,C71  |
| 2 | <i>OR5B12</i>   | 11 | NM_001004733 | - | p.D68Y,p.R232C        | C70,C83  |
| 2 | <i>P4HA2</i>    | 5  | NM_001017973 | - | p.R448S,p.S207L       | A25,B15  |
| 2 | <i>PABPC3</i>   | 13 | NM_030979    | + | p.K156_p.T379S        | A14,A33  |
| 2 | <i>PARP4</i>    | 13 | NM_006437    | - | p.I1039T(2)           | C77,C83  |
| 2 | <i>PCDH15</i>   | 10 | NM_001142763 | - | p.D542V,p.E163Q       | A90,C83  |
| 2 | <i>PCDH8</i>    | 13 | NM_002590    | - | p.G89R,p.K1063N       | C70,C83  |
| 2 | <i>PCDHA8</i>   | 5  | NM_018911    | + | p.R65W,p.V374M        | A84,C05  |
| 2 | <i>PCK1</i>     | 20 | NM_002591    | + | p.R518W,p.T178M       | A08,A86  |
| 2 | <i>PCSK2</i>    | 20 | NM_002594    | + | p.R539H,p.R80K        | A49,C12  |
| 2 | <i>PDE1A</i>    | 2  | NM_001003683 | - | p.M358fs,p.T481I      | A06,C19  |
| 2 | <i>PHF6</i>     | X  | NM_001015877 | + | p.C305R,p.R274_       | A05,A49  |
| 2 | <i>PHGR1</i>    | 15 | NM_001145643 | + | p.HGPGPCGPPPG38del(2) | C101,C98 |
| 2 | <i>PKHD1L1</i>  | 8  | NM_177531    | + | p.T1251K,p.T2639K     | C22,C27  |
| 2 | <i>PLCH1</i>    | 3  | NM_001130960 | - | p.P747T,p.T1658M      | B17,C58  |
| 2 | <i>PLXNA4</i>   | 7  | NM_020911    | - | p.N1421fs,p.R483W     | A30,A87  |
| 2 | <i>PPEF2</i>    | 4  | NM_006239    | - | p.S113T,p.S417fs      | A03,C71  |
| 2 | <i>PPFLA2</i>   | 12 | NM_003625    | - | p.L1247I,p.R556W      | C20,C28  |
| 2 | <i>PPP1R26</i>  | 9  | NM_014811    | + | p.F724Y,p.V129M       | A08,A27  |
| 2 | <i>PROKRI</i>   | 2  | NM_138964    | + | p.A298V,p.K62N        | A05,C33  |
| 2 | <i>PSG1</i>     | 19 | NM_006905    | - | p.A105S,p.R137C       | A54,C27  |

|   |                |    |              |   |                         |          |
|---|----------------|----|--------------|---|-------------------------|----------|
| 2 | <i>PSTPIP1</i> | 15 | NM_003978    | + | p.F407L,p.Q83_          | A22,C71  |
| 2 | <i>PTPN13</i>  | 4  | NM_080685    | + | p.R2207_p.T590I         | A40,C68  |
| 2 | <i>PTPRN2</i>  | 7  | NM_002847    | - | p.A468T,p.G852S         | C05,C69  |
| 2 | <i>RAB27A</i>  | 15 | NM_183234    | - | p.D136V,p.P126L         | C32,C69  |
| 2 | <i>RBI</i>     | 13 | NM_000321    | + | p.E398Q,p.S807_         | C08,C30  |
| 2 | <i>RFC2</i>    | 7  | NM_181471    | - | p.166_167insRGC,p.P351L | A31,C71  |
| 2 | <i>RGS19</i>   | 20 | NM_005873    | - | p.Q53_p.Y146fs          | C102,C54 |
| 2 | <i>RNASE3</i>  | 14 | NM_002935    | + | p.D139E,p.T33M          | A46,C76  |
| 2 | <i>ROBO2</i>   | 3  | NM_002942    | + | p.P1078fs,p.R1305_      | C84,C86  |
| 2 | <i>RPL5</i>    | 1  | NM_000969    | + | p.Y86fs,p.YAAA95del     | A41,A52  |
| 2 | <i>RRN3</i>    | 16 | NM_018427    | - | p.S199L(2)              | B12,C70  |
| 2 | <i>SACS</i>    | 13 | NM_014363    | - | p.P4278S,p.R2214H       | A05,A54  |
| 2 | <i>SATL1</i>   | X  | NM_001012980 | - | p.G37R,p.L314fs         | C68,C71  |
| 2 | <i>SEC16B</i>  | 1  | NM_033127    | - | p.A993V,p.V183fs        | C59,C69  |
| 2 | <i>SEC24D</i>  | 4  | NM_014822    | - | p.G706S,p.T957A         | C15,C69  |
| 2 | <i>SHROOM3</i> | 4  | NM_020859    | + | p.L1797I,p.R1059H       | C49,C76  |
| 2 | <i>SLAIN2</i>  | 4  | NM_020846    | + | p.M142V,p.R365Q         | C69,CA97 |
| 2 | <i>SLC1A6</i>  | 19 | NM_005071    | - | p.T200M,p.T62M          | A81,C35  |
| 2 | <i>SLC22A6</i> | 11 | NM_004790    | - | p.R454W,p.T22I          | A14,C25  |
| 2 | <i>SLC29A4</i> | 7  | NM_153247    | + | p.R324C,p.S499P         | A46,C15  |
| 2 | <i>SLCO4C1</i> | 5  | NM_180991    | - | p.A420T,p.E723Q         | C72,C81  |
| 2 | <i>SLITRK3</i> | 3  | NM_014926    | - | p.P251L,p.R777C         | A27,B04  |
| 2 | <i>SMC4</i>    | 3  | NM_001002800 | + | p.E653Q,p.S781L         | A21,C69  |
| 2 | <i>SOGA3</i>   | 6  | NM_001012279 | - | p.R422H,p.R866W         | A37,B15  |
| 2 | <i>SOX5</i>    | 12 | NM_006940    | - | p.A436V,p.E703_         | A34,A50  |
| 2 | <i>SOX6</i>    | 11 | NM_001145819 | - | p.P444A,p.T410M         | A30,C70  |
| 2 | <i>SPAG17</i>  | 1  | NM_206996    | - | p.E1201D,p.Q1681R       | C69,C81  |
| 2 | <i>SPTB</i>    | 14 | NM_001024858 | - | p.R1746Q,p.R74H         | C84,C98  |
| 2 | <i>SPTBN4</i>  | 19 | NM_020971    | + | p.M930K,p.P2550H        | A13,C77  |
| 2 | <i>ST6GAL2</i> | 2  | NM_001142351 | - | p.P164L,p.R398H         | A33,AC11 |
| 2 | <i>SYN3</i>    | 22 | NM_003490    | - | p.H242P,p.R27C          | C71,C75  |
| 2 | <i>SYNE2</i>   | 14 | NM_182914    | + | p.L1682P,p.Q2726H       | C58,C69  |
| 2 | <i>TDO2</i>    | 4  | NM_005651    | + | p.L209M,p.R272C         | A02,CA69 |

|   |                  |    |              |   |                         |          |
|---|------------------|----|--------------|---|-------------------------|----------|
| 2 | <i>TENM1</i>     | X  | NM_014253    | - | p.A755fs,p.N2551S       | A31,A90  |
| 2 | <i>TET3</i>      | 2  | NM_144993    | + | p.L871P,p.P175S         | A81,C70  |
| 2 | <i>TMEM132A</i>  | 11 | NM_017870    | + | p.R202W,p.R499C         | A36,C71  |
| 2 | <i>TMPO</i>      | 12 | NM_003276    | + | p.K290E,p.S282T         | A25,C69  |
| 2 | <i>TNKS</i>      | 8  | NM_003747    | + | p.A691T,p.G1026V        | C70,CA69 |
| 2 | <i>TRAF7</i>     | 16 | NM_032271    | + | p.T32M,p.T425A          | A88,C58  |
| 2 | <i>TRPC7</i>     | 5  | NM_020389    | - | p.P519L,p.V549M         | A18,A56  |
| 2 | <i>TRPM3</i>     | 9  | NM_001007471 | - | p.M1263V,p.R243P        | A43,C81  |
| 2 | <i>TSC2</i>      | 16 | NM_000548    | + | p.E863K,p.R611W         | A90,C20  |
| 2 | <i>TTL11</i>     | 9  | NM_001139442 | - | p.E121K,p.S65N          | C35,C89  |
| 2 | <i>UBE2D3</i>    | 4  | NM_181893    | - | p.D119E,p.W143_         | C17,C59  |
| 2 | <i>UHRF1BP1L</i> | 12 | NM_015054    | - | p.P516A,p.S99N          | A73,C24  |
| 2 | <i>USP24</i>     | 1  | NM_015306    | - | p.1056_1056S>SS,p.S882_ | A04,C88  |
| 2 | <i>USP35</i>     | 11 | NM_020798    | + | p.K3N,p.R323W           | A91,C64  |
| 2 | <i>USP9X</i>     | X  | NM_001039590 | + | p.E1444fs,p.G1619fs     | A16,A87  |
| 2 | <i>VCAN</i>      | 5  | NM_004385    | + | p.E2299_p.S2292R        | A55,C86  |
| 2 | <i>VPS13B</i>    | 8  | NM_017890    | + | p.L1166F,p.V2414M       | A35,B02  |
| 2 | <i>WDR17</i>     | 4  | NM_170710    | + | p.A538S,p.R1144H        | AC04,C72 |
| 2 | <i>WDR87</i>     | 19 | NM_031951    | - | p.K2692N,p.R253_        | A65,C98  |
| 2 | <i>WHSC1</i>     | 4  | NM_001042424 | + | p.E1099K(2)             | C83,C96  |
| 2 | <i>WNK2</i>      | 9  | NM_006648    | + | p.A2160V,p.V1507I       | A17,C69  |
| 2 | <i>XAB2</i>      | 19 | NM_020196    | - | p.V615M,p.V798M         | A38,C66  |
| 2 | <i>XIRP2</i>     | 2  | NM_152381    | + | p.D3233G,p.S143G        | C21,C70  |
| 2 | <i>ZFP36L2</i>   | 2  | NM_006887    | - | p.G144fs,p.K102fs       | C40,C54  |
| 2 | <i>ASNA1</i>     | 19 | NM_004317    | + | p.262_263insG,p.I262V   | A68(2)   |
| 2 | <i>BCL2</i>      | 18 | NM_000633    | - | p.A60T,p.T7A            | A32(2)   |
| 2 | <i>CASK</i>      | X  | NM_003688    | - | p.D280H,p.R279Q         | A75(2)   |
| 2 | <i>DNAH10</i>    | 12 | NM_207437    | + | p.R2563_p.S3189F        | A90(2)   |
| 2 | <i>FANCB</i>     | X  | NM_001018113 | - | p.L734V,p.S628L         | C79(2)   |
| 2 | <i>KIAA0391</i>  | 14 | NM_014672    | + | p.D546fs,p.S544fs       | C49(2)   |
| 2 | <i>MUC6</i>      | 11 | NM_005961    | - | p.P823L,p.V105I         | A32(2)   |
| 2 | <i>PER3</i>      | 1  | NM_016831    | + | p.K998E,p.M997R         | A68(2)   |

---

**Table S4. Somatic CNVs identified by high-density SNP arrays**

\*Based on UCSC hg19 reference

| Age group | Cytoband     | Start*    | End*      | Gene length* | Gene             | Gains   | Losses |
|-----------|--------------|-----------|-----------|--------------|------------------|---------|--------|
| adult     | 1q24         | 174128551 | 174927327 | 9910         | <i>RABGAP1L</i>  | 1.22    | 0      |
| adult     | 1q24-q25     | 174968570 | 174981163 | 27101        | <i>CACYBP</i>    | 1.2567  | 0      |
| adult     | 1q25.1       | 174982093 | 174992591 | 63931        | <i>MRPS14</i>    | 1.2567  | 0      |
| adult     | 1q23-q24     | 175036993 | 175117202 | 63923        | <i>TNN</i>       | 1.2567  | 0      |
| adult     | 1q25.1       | 175126122 | 175161949 | 9674         | <i>KIAA0040</i>  | 1.2567  | 0      |
| adult     | 1q24         | 175291934 | 175712752 | 7143         | <i>TNR</i>       | 1.2567  | 0      |
| adult     | 1q25.1-q25.2 | 175913961 | 176176380 | 64326        | <i>RFWD2</i>     | 1.2567  | 0      |
| adult     | 1q25.1       | 175937532 | 175937676 | 677679       | <i>SCARNA3</i>   | 1.2567  | 0      |
| adult     | 1q25.2       | 176432306 | 176660341 | 60676        | <i>PAPPA2</i>    | 1.2567  | 0      |
| adult     | 1q25.2       | 176830199 | 177134040 | 460          | <i>ASTNI</i>     | 1.2567  | 0      |
| adult     | 1q25.2       | 176998498 | 176998581 | 574441       | <i>MIR488</i>    | 1.2567  | 0      |
| adult     | 1q25.2       | 177898241 | 177939050 | 89866        | <i>SEC16B</i>    | 1.2567  | 0      |
| adult     | 1q25.2       | 177975274 | 178007142 | 730102       | <i>LOC730102</i> | 1.2567  | 0      |
| adult     | 1q24         | 178062863 | 178448648 | 9462         | <i>RASAL2</i>    | 1.2567  | 0      |
| adult     | 1q25.2       | 178482211 | 178490946 | 84066        | <i>TEX35</i>     | 1.2567  | 0      |
| adult     | 1q25.2       | 178511930 | 178518024 | 400798       | <i>C1orf220</i>  | 1.2567  | 0      |
| adult     | 1q25.2       | 178694281 | 178890977 | 55103        | <i>RALGPS2</i>   | 1.2547  | 0      |
| adult     | 1q25.2       | 178818669 | 178840215 | 9068         | <i>ANGPTL1</i>   | 1.2547  | 0      |
| adult     | 1q25         | 178995073 | 179045702 | 9917         | <i>FAM20B</i>    | 1.2547  | 0      |
| adult     | 1q25.2       | 179051111 | 179065129 | 64222        | <i>TOR3A</i>     | 1.2547  | 0      |
| adult     | 1q25.2       | 179068461 | 179112224 | 27           | <i>ABL2</i>      | 1.2547  | 0      |
| adult     | 1q25         | 179262848 | 179327814 | 6646         | <i>SOAT1</i>     | 1.2547  | 0      |
| adult     | 1q25.2       | 179334854 | 179523870 | 126859       | <i>AXDND1</i>    | 1.2547  | 0      |
| adult     | 1q25.2       | 179560747 | 179660407 | 163589       | <i>TDRD5</i>     | 1.24295 | 0      |
| adult     | 1q25.2       | 179712297 | 179785333 | 148753       | <i>FAM163A</i>   | 1.4434  | 0      |
| adult     | 1q25.2       | 179809101 | 179846941 | 163590       | <i>TOR1AIP2</i>  | 1.4434  | 0      |
| adult     | 1q24.2       | 179851176 | 179889212 | 26092        | <i>TOR1AIP1</i>  | 1.4434  | 0      |
| adult     | 1q25.2       | 179923907 | 180084015 | 9857         | <i>CEP350</i>    | 1.4434  | 0      |
| adult     | 1q24         | 180123967 | 180167169 | 5768         | <i>QSOX1</i>     | 1.4434  | 0      |

|       |          |           |           |           |                  |        |   |
|-------|----------|-----------|-----------|-----------|------------------|--------|---|
| adult | 1q25.2   | 180167143 | 180169859 | 200058    | <i>FLJ23867</i>  | 1.4434 | 0 |
| adult | 1q25.2   | 180199432 | 180244188 | 89884     | <i>LHX4</i>      | 1.4434 | 0 |
| adult | 1q25.3   | 180257351 | 180472022 | 84320     | <i>ACBD6</i>     | 1.4434 | 0 |
| adult | 1q25.1   | 180601145 | 180859415 | 9213      | <i>XPR1</i>      | 1.4434 | 0 |
| adult | 1q25.3   | 180882312 | 180915239 | 57710     | <i>KIAA1614</i>  | 1.4434 | 0 |
| adult | 1q25.3   | 180941849 | 180992257 | 10228     | <i>STX6</i>      | 1.4434 | 0 |
| adult | 1q25.3   | 181002560 | 181031074 | 3140      | <i>MR1</i>       | 1.4434 | 0 |
| adult | 1q25.3   | 181057637 | 181059979 | 51278     | <i>IER5</i>      | 1.4434 | 0 |
| adult | 1q25.3   | 181205523 | 181207740 | 100287948 | <i>GMI40</i>     | 1.4434 | 0 |
| adult | 1q25.3   | 181452685 | 181775921 | 777       | <i>CACNA1E</i>   | 1.4434 | 0 |
| adult | 1q25.3   | 182023704 | 182030847 | 127665    | <i>ZNF648</i>    | 1.4434 | 0 |
| adult | 1q31     | 182347227 | 182360539 | 2752      | <i>GLUL</i>      | 1.4434 | 0 |
| adult | 1q25.3   | 182367251 | 182369751 | 127670    | <i>TEDDMI</i>    | 1.6767 | 0 |
| adult | 1q25.3   | 182376755 | 182383948 | 388719    | <i>LINC00272</i> | 1.6767 | 0 |
| adult | 1q25     | 182419255 | 182529732 | 353299    | <i>RGSL1</i>     | 1.6767 | 0 |
| adult | 1q25     | 182542768 | 182558394 | 6041      | <i>RNASEL</i>    | 1.6767 | 0 |
| adult | 1q25-q31 | 182567757 | 182573548 | 6004      | <i>RGS16</i>     | 1.6767 | 0 |
| adult | 1q25.3   | 182584274 | 182585764 | 284648    | <i>LOC284648</i> | 1.6767 | 0 |
| adult | 1q25     | 182615791 | 182642067 | 85397     | <i>RGS8</i>      | 1.6767 | 0 |
| adult | 1q25     | 182758583 | 182799519 | 80896     | <i>NPL</i>       | 1.6767 | 0 |
| adult | 1q25     | 182808438 | 182857117 | 1660      | <i>DHX9</i>      | 1.6767 | 0 |
| adult | 1q25.3   | 182868999 | 182922553 | 81626     | <i>SHCBP1L</i>   | 1.6767 | 0 |
| adult | 1q31     | 182992594 | 183114727 | 3915      | <i>LAMC1</i>     | 1.6767 | 0 |
| adult | 1q25-q31 | 183155173 | 183210406 | 3918      | <i>LAMC2</i>     | 1.6767 | 0 |
| adult | 1q25     | 183217371 | 183274009 | 23057     | <i>NMNAT2</i>    | 1.6767 | 0 |
| adult | 1q25.3   | 183430010 | 183441117 | 284649    | <i>SMG7-AS1</i>  | 1.6767 | 0 |
| adult | 1q25     | 183441505 | 183523328 | 9887      | <i>SMG7</i>      | 1.6767 | 0 |
| adult | 1q25     | 183524696 | 183559739 | 4688      | <i>NCF2</i>      | 1.6767 | 0 |
| adult | 1q25.3   | 183595327 | 183605076 | 10092     | <i>ARPC5</i>     | 1.6767 | 0 |
| adult | 1q25.3   | 183605181 | 183897685 | 23179     | <i>RGL1</i>      | 1.6767 | 0 |
| adult | 1q25.3   | 183615410 | 183622448 | 403314    | <i>APOBEC4</i>   | 1.6767 | 0 |
| adult | 1q25     | 183904965 | 184006904 | 23127     | <i>COLGALT2</i>  | 1.6767 | 0 |
| adult | 1q25     | 184020784 | 184043344 | 116461    | <i>TSEN15</i>    | 1.6767 | 0 |



|       |              |           |           |           |                  |         |   |
|-------|--------------|-----------|-----------|-----------|------------------|---------|---|
| adult | 1q25         | 184356149 | 184598155 | 81563     | <i>C1orf21</i>   | 1.6767  | 0 |
| adult | 1q25         | 184659624 | 184724041 | 80267     | <i>EDEM3</i>     | 1.6767  | 0 |
| adult | 1q25         | 184760158 | 184943718 | 116496    | <i>FAM129A</i>   | 1.6767  | 0 |
| adult | 1q25.3       | 185014550 | 185071740 | 6045      | <i>RNF2</i>      | 1.9423  | 0 |
| adult | 1q25.2       | 185087217 | 185126116 | 81627     | <i>TRMT1L</i>    | 1.9423  | 0 |
| adult | 1q25         | 185126191 | 185260913 | 54823     | <i>SWTI</i>      | 1.9423  | 0 |
| adult | 1q25.1-q31.1 | 185265521 | 185286461 | 10625     | <i>IVNSIABP</i>  | 2.15    | 0 |
| adult | 1q25.3-q31.1 | 185703682 | 186160085 | 83872     | <i>HMCN1</i>     | 2.15    | 0 |
| adult | 10q21.1      | 186029866 | 186446655 | 100302192 | <i>MIR548F1</i>  | 2.15    | 0 |
| adult | 1q25-q31     | 186265404 | 186283694 | 10216     | <i>PRG4</i>      | 2.15    | 0 |
| adult | 1q25         | 186280785 | 186344457 | 7175      | <i>TPR</i>       | 2.15    | 0 |
| adult | 1q25         | 186344889 | 186390503 | 54953     | <i>C1orf27</i>   | 2.15    | 0 |
| adult | 1q25         | 186369703 | 186370587 | 10896     | <i>OCLM</i>      | 2.15    | 0 |
| adult | 1q25.2       | 186412697 | 186417856 | 5132      | <i>PDC</i>       | 2.15    | 0 |
| adult | 1q25.2-q25.3 | 186640943 | 186649559 | 5743      | <i>PTGS2</i>     | 2.15    | 0 |
| adult | 1q25         | 186798031 | 186958113 | 5321      | <i>PLA2G4A</i>   | 2.15    | 0 |
| adult | 1q31.1-q31.2 | 190594019 | 190770788 | 440704    | <i>LOC440704</i> | 2.54235 | 0 |
| adult | 1q31.2       | 192127591 | 192154945 | 64407     | <i>RGS18</i>     | 2.4033  | 0 |
| adult | 1q31.2       | 192286121 | 192336414 | 431704    | <i>RGS21</i>     | 2.4033  | 0 |
| adult | 1q31         | 192544856 | 192549159 | 5996      | <i>RGS1</i>      | 2.4033  | 0 |
| adult | 1q31.2       | 192605267 | 192629440 | 6003      | <i>RGS13</i>     | 2.4033  | 0 |
| adult | 1q31         | 192778168 | 192781407 | 5997      | <i>RGS2</i>      | 2.4033  | 0 |
| adult | 1q32         | 192981495 | 193028523 | 51377     | <i>UCHL5</i>     | 2.4033  | 0 |
| adult | 1q31         | 193028551 | 193055115 | 6738      | <i>TROVE2</i>    | 2.4033  | 0 |
| adult | 1q31.2       | 193065594 | 193074608 | 51022     | <i>GLRX2</i>     | 2.4033  | 0 |
| adult | 1q25         | 193091087 | 193223942 | 79577     | <i>CDC73</i>     | 2.4033  | 0 |
| adult | 1q31         | 193147859 | 193155743 | 8707      | <i>B3GALT2</i>   | 2.4033  | 0 |
| adult | 1q31.3       | 196194909 | 196577561 | 343450    | <i>KCNT2</i>     | 2.6728  | 0 |
| adult | 1q32         | 196621007 | 196670695 | 3075      | <i>CFH</i>       | 2.6728  | 0 |
| adult | 1q32         | 196743929 | 196763203 | 10878     | <i>CFHR3</i>     | 2.6728  | 0 |
| adult | 1q32         | 196788860 | 196801319 | 3078      | <i>CFHR1</i>     | 2.4522  | 0 |
| adult | 1q32         | 196857143 | 196887843 | 10877     | <i>CFHR4</i>     | 2.6649  | 0 |
| adult | 1q31.3       | 196912897 | 196928356 | 3080      | <i>CFHR2</i>     | 2.6649  | 0 |

|       |              |           |           |           |                   |        |         |
|-------|--------------|-----------|-----------|-----------|-------------------|--------|---------|
| adult | 1q31.3       | 196946666 | 196978803 | 81494     | <i>CFHR5</i>      | 2.6649 | 0       |
| adult | 1q31-q32.1   | 197008320 | 197036397 | 2165      | <i>F13B</i>       | 2.6649 | 0       |
| adult | 1q31         | 197053256 | 197115824 | 259266    | <i>ASPM</i>       | 2.6649 | 0       |
| adult | 1q31.3       | 197122813 | 197169672 | 360023    | <i>ZBTB41</i>     | 2.6649 | 0       |
| adult | 1q31.3       | 197170591 | 197447585 | 23418     | <i>CRB1</i>       | 2.6649 | 0       |
| adult | 1q31.3       | 197473878 | 197744623 | 163486    | <i>DENND1B</i>    | 2.6649 | 0       |
| adult | 1q31.3       | 197871681 | 197876497 | 388722    | <i>C1orf53</i>    | 2.6649 | 0       |
| adult | 1q31.1       | 197881634 | 197899273 | 56956     | <i>LHX9</i>       | 2.6649 | 0       |
| adult | 1q31.3       | 198126107 | 198291548 | 140609    | <i>NEK7</i>       | 2.6649 | 0       |
| adult | 1q31.3       | 198492351 | 198510075 | 127124    | <i>ATP6V1G3</i>   | 2.4018 | 0       |
| adult | 1q31-q32     | 198608097 | 198664300 | 5788      | <i>PTPRC</i>      | 2.4018 | 0       |
| adult | 1q32.1       | 198777131 | 198906558 | 100131234 | <i>MIR181A1HG</i> | 1.9622 | -0.4867 |
| adult | 1q32.1       | 198828001 | 198828111 | 406955    | <i>MIR181B1</i>   | 1.9622 | -0.4867 |
| adult | 1q32.1       | 198828172 | 198828282 | 406995    | <i>MIR181A1</i>   | 1.9622 | -0.4867 |
| adult | 1q32.1       | 199996729 | 200146550 | 2494      | <i>NR5A2</i>      | 1.9622 | 0       |
| adult | 1q32.1       | 200311671 | 200342920 | 554279    | <i>LINC00862</i>  | 1.9622 | 0       |
| adult | 1q32.1       | 200374074 | 200379186 | 23528     | <i>ZNF281</i>     | 1.9622 | 0       |
| adult | 1q32.1       | 200520624 | 200589862 | 9928      | <i>KIF14</i>      | 1.9622 | 0       |
| adult | 1q32.1       | 200613164 | 200639126 | 83479     | <i>DDX59</i>      | 1.9622 | 0       |
| adult | 1q32.1       | 200708685 | 200829835 | 23271     | <i>CAMSAP2</i>    | 1.9622 | 0       |
| adult | 1q32.1       | 200842082 | 200843306 | 2848      | <i>GPR25</i>      | 1.9622 | 0       |
| adult | 1q32.1       | 200860626 | 200884864 | 55765     | <i>C1orf106</i>   | 1.9622 | 0       |
| adult | 1q32.1       | 200938513 | 200992828 | 23046     | <i>KIF21B</i>     | 1.9622 | 0       |
| adult | 1q32         | 201008639 | 201081694 | 779       | <i>CACNAIS</i>    | 1.9622 | 0       |
| adult | 1q32.1       | 201083080 | 201084500 | 647219    | <i>ASCL5</i>      | 1.9622 | 0       |
| adult | 1q32.1       | 201159952 | 201198080 | 91156     | <i>IGFNI</i>      | 1.4566 | 0       |
| adult | 1q32         | 201252579 | 201302121 | 5317      | <i>PKP1</i>       | 1.4566 | 0       |
| adult | 1q32         | 201328135 | 201346828 | 7139      | <i>TNNT2</i>      | 1.4566 | 0       |
| adult | 1q25.1-q32.3 | 201349965 | 201368669 | 3898      | <i>LADI</i>       | 1.4566 | 0       |
| adult | 1q31.3       | 201372894 | 201390874 | 7135      | <i>TNNI1</i>      | 1.4566 | 0       |
| adult | 1q31         | 201433411 | 201438299 | 23612     | <i>PHLDA3</i>     | 1.4566 | 0       |
| adult | 1q32         | 201452657 | 201465701 | 1465      | <i>CSRP1</i>      | 1.4566 | 0       |
| adult | 1q32.1       | 201489031 | 201489720 | 376693    | <i>RPS10P7</i>    | 1.4566 | 0       |

|       |          |           |           |        |                  |        |   |
|-------|----------|-----------|-----------|--------|------------------|--------|---|
| adult | 1q32.3   | 201617449 | 201796102 | 89796  | <i>NAVI</i>      | 1.4566 | 0 |
| adult | 1q32.1   | 201798287 | 201853422 | 55705  | <i>IPO9</i>      | 1.4566 | 0 |
| adult | 1q32.1   | 201857796 | 201861715 | 149345 | <i>SHISA4</i>    | 1.4566 | 0 |
| adult | 1q32     | 201865583 | 201915716 | 25802  | <i>LMOD1</i>     | 1.4566 | 0 |
| adult | 1q32.1   | 201924618 | 201939789 | 10440  | <i>TIMM17A</i>   | 1.4566 | 0 |
| adult | 1q32     | 201951765 | 201975275 | 6051   | <i>RNPEP</i>     | 1.4566 | 0 |
| adult | 1q32.2   | 201979689 | 201986315 | 1999   | <i>ELF3</i>      | 1.4566 | 0 |
| adult | 1q32.1   | 202092028 | 202098634 | 9283   | <i>GPR37L1</i>   | 1.4566 | 0 |
| adult | 1q32.1   | 202102531 | 202113871 | 127829 | <i>ARL8A</i>     | 1.4566 | 0 |
| adult | 1q32.1   | 202116140 | 202129119 | 5778   | <i>PTPN7</i>     | 1.4566 | 0 |
| adult | 1q32.1   | 202137178 | 202158577 | 148713 | <i>PTPRVP</i>    | 1.4566 | 0 |
| adult | 1q32.1   | 202163117 | 202288889 | 59352  | <i>LGR6</i>      | 1.4566 | 0 |
| adult | 1q32.1   | 202300784 | 202311094 | 29089  | <i>UBE2T</i>     | 1.4566 | 0 |
| adult | 1q32.1   | 202317829 | 202407370 | 4660   | <i>PPP1R12B</i>  | 1.4566 | 0 |
| adult | 1q32.1   | 202559724 | 202612581 | 127833 | <i>SYT2</i>      | 1.4566 | 0 |
| adult | 1q32.1   | 202694312 | 202778598 | 10765  | <i>KDM5B</i>     | 1.4566 | 0 |
| adult | 1q32.1   | 202830881 | 202844369 | 148709 | <i>LOC148709</i> | 1.4566 | 0 |
| adult | 1q32.1   | 202847409 | 202858385 | 5877   | <i>RAB1F</i>     | 1.4566 | 0 |
| adult | 1q32.1   | 202860223 | 202896400 | 59349  | <i>KLHL12</i>    | 1.4566 | 0 |
| adult | 1q32.1   | 202909952 | 202927524 | 51094  | <i>ADIPOR1</i>   | 1.4566 | 0 |
| adult | 1q32.1   | 202931000 | 202936404 | 51706  | <i>CYB5R1</i>    | 1.4566 | 0 |
| adult | 1q32.1   | 202976533 | 202993197 | 92703  | <i>TMEM183A</i>  | 1.4566 | 0 |
| adult | 1q31-q41 | 203052256 | 203055166 | 4656   | <i>MYOG</i>      | 1.4566 | 0 |
| adult | 1q32.1   | 203096835 | 203136533 | 134    | <i>ADORA1</i>    | 1.4566 | 0 |
| adult | 1q32.1   | 203136938 | 203144942 | 4608   | <i>MYBPH</i>     | 1.4566 | 0 |
| adult | 1q32.1   | 203148058 | 203155922 | 1116   | <i>CHI3L1</i>    | 1.4566 | 0 |
| adult | 1q32.1   | 203185206 | 203198860 | 1118   | <i>CHIT1</i>     | 1.4566 | 0 |
| adult | 1q32     | 203274663 | 203278729 | 7832   | <i>BTG2</i>      | 1.4566 | 0 |
| adult | 1q32     | 203309748 | 203320557 | 2331   | <i>FMOD</i>      | 1.4566 | 0 |
| adult | 1q32     | 203444882 | 203460479 | 5549   | <i>PRELP</i>     | 1.4566 | 0 |
| adult | 1q32.1   | 203463270 | 203478077 | 26254  | <i>OPTC</i>      | 1.4566 | 0 |
| adult | 1q32.1   | 203595914 | 203713209 | 493    | <i>ATP2B4</i>    | 1.4368 | 0 |
| adult | 1q32.1   | 203698708 | 203698833 | 677843 | <i>SNORA77</i>   | 1.2228 | 0 |

|       |          |           |           |           |                  |        |   |
|-------|----------|-----------|-----------|-----------|------------------|--------|---|
| adult | 1q32.1   | 203699704 | 203700979 | 84719     | <i>LINC00260</i> | 1.2228 | 0 |
| adult | 1q32.1   | 203734283 | 203745480 | 54900     | <i>LAX1</i>      | 1.2228 | 0 |
| adult | 1q32.1   | 203764750 | 203823256 | 9877      | <i>ZC3H11A</i>   | 1.2228 | 0 |
| adult | 1q32.1   | 203766650 | 203769590 | 100381270 | <i>ZBED6</i>     | 1.2228 | 0 |
| adult | 1q32     | 203830712 | 203840280 | 6635      | <i>SNRPE</i>     | 1.2228 | 0 |
| adult | 1q32.1   | 204001574 | 204010392 | 284573    | <i>LINC00303</i> | 1.2228 | 0 |
| adult | 1q32     | 204042245 | 204096871 | 9580      | <i>SOX13</i>     | 1.2228 | 0 |
| adult | 1q32.1   | 204100188 | 204121310 | 55224     | <i>ETNK2</i>     | 1.2228 | 0 |
| adult | 1q32     | 204123943 | 204135465 | 5972      | <i>REN</i>       | 1.2228 | 0 |
| adult | 1q32     | 204159468 | 204165619 | 3814      | <i>KISS1</i>     | 1.2228 | 0 |
| adult | 1q32.1   | 204167287 | 204183220 | 127845    | <i>GOLT1A</i>    | 1.2228 | 0 |
| adult | 1q32.1   | 204187978 | 204329057 | 22874     | <i>PLEKHA6</i>   | 1.2228 | 0 |
| adult | 1q32.1   | 204337557 | 204338847 | 127841    | <i>LINC00628</i> | 1.2228 | 0 |
| adult | 1q32.1   | 204372491 | 204380945 | 84919     | <i>PPP1R15B</i>  | 1.2228 | 0 |
| adult | 1q32     | 204391757 | 204459474 | 5287      | <i>PIK3C2B</i>   | 1.2228 | 0 |
| adult | 1q32     | 204485506 | 204527248 | 4194      | <i>MDM4</i>      | 1.2228 | 0 |
| adult | 1q32.1   | 204586302 | 204654481 | 10446     | <i>LRRN2</i>     | 1.2228 | 0 |
| adult | 1q32.1   | 204797781 | 204946274 | 23114     | <i>NFASC</i>     | 1.2228 | 0 |
| adult | 1q32.1   | 205012339 | 205047171 | 6900      | <i>CNTN2</i>     | 1.2228 | 0 |
| adult | 1q32.1   | 205052256 | 205053588 | 388730    | <i>TMEM81</i>    | 1.2228 | 0 |
| adult | 1q32     | 205055269 | 205091150 | 5929      | <i>RBBP5</i>     | 1.2228 | 0 |
| adult | 1q32.1   | 205111630 | 205180727 | 25778     | <i>DSTYK</i>     | 1.2228 | 0 |
| adult | 1q32.1   | 205197037 | 205242471 | 9911      | <i>TMCC2</i>     | 1.2228 | 0 |
| adult | 1q32.1   | 205271190 | 205290919 | 81788     | <i>NUAK2</i>     | 1.2228 | 0 |
| adult | 1q32.1   | 205305192 | 205326128 | 55220     | <i>KLHDC8A</i>   | 1.2228 | 0 |
| adult | 1q32.1   | 205342379 | 205356568 | 284576    | <i>LEMD1-AS1</i> | 1.2228 | 0 |
| adult | 1q32.1   | 205350505 | 205391214 | 93273     | <i>LEMD1</i>     | 1.2228 | 0 |
| adult | 1q32.1   | 205417429 | 205417526 | 442891    | <i>MIR135B</i>   | 1.2228 | 0 |
| adult | 1q31-q32 | 205473683 | 205501921 | 5129      | <i>CDK18</i>     | 1.2228 | 0 |
| adult | 1q32.1   | 205523400 | 205525763 | 284578    | <i>LOC284578</i> | 1.2228 | 0 |
| adult | 1q32.1   | 205538111 | 205572046 | 148808    | <i>MFSD4</i>     | 1.2228 | 0 |
| adult | 1q32     | 205577070 | 205602000 | 2005      | <i>ELK4</i>      | 1.2228 | 0 |
| adult | 1q32.1   | 205626980 | 205649630 | 85414     | <i>SLC45A3</i>   | 1.2228 | 0 |

|       |          |           |           |        |                  |        |   |
|-------|----------|-----------|-----------|--------|------------------|--------|---|
| adult | 1q32.1   | 205681946 | 205719372 | 64710  | <i>NUCKS1</i>    | 1.2228 | 0 |
| adult | 1q32.1   | 205758220 | 205782324 | 254428 | <i>SLC41A1</i>   | 1.2228 | 0 |
| adult | 1q32.1   | 205797149 | 205819276 | 148811 | <i>PM20D1</i>    | 1.2228 | 0 |
| adult | 1q32.1   | 205831206 | 205865215 | 284581 | <i>LOC284581</i> | 1.2228 | 0 |
| adult | 1q32.1   | 205882176 | 205912588 | 115019 | <i>SLC26A9</i>   | 1.2228 | 0 |
| adult | 1q32.1   | 206138454 | 206155151 | 729533 | <i>FAM72A</i>    | 1.2228 | 0 |
| adult | 1q32     | 206224282 | 206231482 | 553    | <i>AVPR1B</i>    | 1.2228 | 0 |
| adult | 1q32.1   | 206238871 | 206288647 | 440712 | <i>C1orf186</i>  | 1.2228 | 0 |
| adult | 1q31     | 206317458 | 206332104 | 1510   | <i>CTSE</i>      | 1.2228 | 0 |
| adult | 1p11.2   | 206516199 | 206581301 | 653464 | <i>SRGAP2C</i>   | 1.2228 | 0 |
| adult | 1q32.1   | 206516199 | 206637783 | 23380  | <i>SRGAP2</i>    | 1.2228 | 0 |
| adult | 1q32.1   | 206643585 | 206670223 | 9641   | <i>IKBKE</i>     | 1.2228 | 0 |
| adult | 1q32.1   | 206680862 | 206762616 | 83593  | <i>RASSF5</i>    | 1.2228 | 0 |
| adult | 1q32.1   | 206764973 | 206785904 | 1939   | <i>EIF2D</i>     | 1.2228 | 0 |
| adult | 1q32.1   | 206808880 | 206822542 | 8444   | <i>DYRK3</i>     | 1.2228 | 0 |
| adult | 1q32     | 206858364 | 206907630 | 9261   | <i>MAPKAPK2</i>  | 1.2228 | 0 |
| adult | 1q31-q32 | 206940947 | 206945839 | 3586   | <i>IL10</i>      | 1.2228 | 0 |
| adult | 1q32.2   | 206972214 | 207016326 | 29949  | <i>IL19</i>      | 1.2228 | 0 |
| adult | 1q32     | 207039153 | 207042568 | 50604  | <i>IL20</i>      | 1.2228 | 0 |
| adult | 1q32     | 207070787 | 207077484 | 11009  | <i>IL24</i>      | 1.2228 | 0 |
| adult | 1q32.1   | 207076630 | 207095235 | 9214   | <i>FAIM3</i>     | 1.2228 | 0 |
| adult | 1q31-q41 | 207101866 | 207119811 | 5284   | <i>PIGR</i>      | 1.2228 | 0 |
| adult | 1q32.1   | 207131311 | 207143970 | 83953  | <i>FCAMR</i>     | 1.2228 | 0 |
| adult | 1q32.1   | 207191865 | 207206101 | 79098  | <i>C1orf116</i>  | 1.2228 | 0 |
| adult | 1q32.2   | 207217193 | 207224422 | 55432  | <i>YOD1</i>      | 1.2228 | 0 |
| adult | 1q31     | 207226619 | 207251162 | 5208   | <i>PFKFB2</i>    | 1.2228 | 0 |
| adult | 1q32     | 207262186 | 207273337 | 725    | <i>C4BPB</i>     | 1.2228 | 0 |
| adult | 1q32     | 207277606 | 207318317 | 722    | <i>C4BPA</i>     | 1.2103 | 0 |
| adult | 1q32     | 207494816 | 207534311 | 1604   | <i>CD55</i>      | 1.3989 | 0 |
| adult | 1q32     | 207627644 | 207663240 | 1380   | <i>CR2</i>       | 1.8156 | 0 |
| adult | 1q32     | 207669472 | 207815110 | 1378   | <i>CR1</i>       | 1.8156 | 0 |
| adult | 1q32.1   | 207818457 | 207897036 | 1379   | <i>CR1L</i>      | 1.8156 | 0 |
| adult | 1q32     | 207925382 | 207968861 | 4179   | <i>CD46</i>      | 1.8156 | 0 |

|       |              |           |           |        |                    |         |   |
|-------|--------------|-----------|-----------|--------|--------------------|---------|---|
| adult | 1q32.2       | 207975787 | 207975868 | 407026 | <i>MIR29C</i>      | 1.8156  | 0 |
| adult | 1q32.2       | 207991723 | 207995941 | 148696 | <i>LOC148696</i>   | 1.8156  | 0 |
| adult | 1q32         | 208059882 | 208084683 | 947    | <i>CD34</i>        | 1.8156  | 0 |
| adult | 1q32.2       | 208195587 | 208417665 | 5362   | <i>PLXNA2</i>      | 1.8156  | 0 |
| adult | 1q32.2       | 209602167 | 209605892 | 642587 | <i>MIR205HG</i>    | 1.8156  | 0 |
| adult | 1q32.2       | 209605477 | 209605587 | 406988 | <i>MIR205</i>      | 1.8156  | 0 |
| adult | 1q32.2       | 209757044 | 209787284 | 57172  | <i>CAMK1G</i>      | 1.8156  | 0 |
| adult | 1q32         | 209788217 | 209824679 | 3914   | <i>LAMB3</i>       | 1.8156  | 0 |
| adult | 1q32.2       | 209848669 | 209849735 | 50486  | <i>G0S2</i>        | 1.8156  | 0 |
| adult | 1q32-q41     | 209859524 | 209908295 | 3290   | <i>HSD11B1</i>     | 1.8156  | 0 |
| adult | 1q32         | 209929376 | 209955668 | 80342  | <i>TRAF3IP3</i>    | 1.8156  | 0 |
| adult | 1q32.2       | 209952552 | 209958075 | 148304 | <i>C1orf74</i>     | 1.8156  | 0 |
| adult | 1q32.3-q41   | 209958967 | 209979520 | 3664   | <i>IRF6</i>        | 1.8156  | 0 |
| adult | 1q32.2       | 210001311 | 210030910 | 27042  | <i>DIEXF</i>       | 1.8156  | 0 |
| adult | 1q32.2       | 210111518 | 210337633 | 255928 | <i>SYT14</i>       | 1.8617  | 0 |
| adult | 1q32.2       | 210404803 | 210407466 | 574036 | <i>SERTAD4-AS1</i> | 1.8617  | 0 |
| adult | 1q32.1-q41   | 210406194 | 210416440 | 56256  | <i>SERTAD4</i>     | 1.8617  | 0 |
| adult | 1q32         | 210501595 | 210849638 | 55733  | <i>HHAT</i>        | 1.8656  | 0 |
| adult | 1q32.2       | 210851656 | 211307457 | 3756   | <i>KCNH1</i>       | 2.08075 | 0 |
| adult | 1q32.2       | 211432707 | 211486655 | 55758  | <i>RCOR3</i>       | 2.0876  | 0 |
| adult | 1q32         | 211499956 | 211548286 | 7188   | <i>TRAF5</i>       | 2.0876  | 0 |
| adult | 1q32.3       | 211556096 | 211605877 | 84791  | <i>LINC00467</i>   | 2.0876  | 0 |
| adult | 1q32.3       | 211649863 | 211666259 | 343035 | <i>RD3</i>         | 2.0876  | 0 |
| adult | 1q32.3       | 211748380 | 211752099 | 7779   | <i>SLC30A1</i>     | 2.0876  | 0 |
| adult | 1q32.3       | 211831598 | 211848972 | 4751   | <i>NEK2</i>        | 2.0876  | 0 |
| adult | 1q32         | 211916798 | 212004114 | 9926   | <i>LPGAT1</i>      | 2.0876  | 0 |
| adult | 1q32.3       | 212113740 | 212209002 | 25896  | <i>INTS7</i>       | 2.0876  | 0 |
| adult | 1q32         | 212208894 | 212278348 | 51514  | <i>DTL</i>         | 2.0876  | 0 |
| adult | 1q32.2-q32.3 | 212458878 | 212535205 | 5525   | <i>PPP2R5A</i>     | 2.096   | 0 |
| adult | 1q32.3       | 212526159 | 212526292 | 692157 | <i>SNORA16B</i>    | 2.096   | 0 |
| adult | 1q32.3       | 212537815 | 212588243 | 55248  | <i>TMEM206</i>     | 2.096   | 0 |
| adult | 1q32.3       | 212606228 | 212619721 | 29937  | <i>NENF</i>        | 2.096   | 0 |
| adult | 1q32.3       | 212738675 | 212794119 | 467    | <i>ATF3</i>        | 2.096   | 0 |

|       |        |           |           |           |                   |       |   |
|-------|--------|-----------|-----------|-----------|-------------------|-------|---|
| adult | 1q32.3 | 212797788 | 212800120 | 149647    | <i>FAM71A</i>     | 2.096 | 0 |
| adult | 1q32.3 | 212859758 | 212873327 | 55509     | <i>BATF3</i>      | 2.096 | 0 |
| adult | 1q41   | 212899494 | 212965139 | 25936     | <i>NSLI</i>       | 2.096 | 0 |
| adult | 1q32.3 | 212965169 | 212990167 | 128387    | <i>TATDN3</i>     | 2.096 | 0 |
| adult | 1q32.3 | 213029945 | 213031480 | 642946    | <i>FLVCR1-AS1</i> | 2.096 | 0 |
| adult | 1q32.3 | 213031596 | 213072705 | 28982     | <i>FLVCR1</i>     | 2.096 | 0 |
| adult | 1q32.3 | 213123861 | 213164927 | 79805     | <i>VASH2</i>      | 2.096 | 0 |
| adult | 1q32.3 | 213165523 | 213189217 | 90806     | <i>ANGEL2</i>     | 2.096 | 0 |
| adult | 1q41   | 213224574 | 213446808 | 26750     | <i>RPS6KC1</i>    | 2.096 | 0 |
| adult | 1q32.3 | 214098091 | 214099996 | 100861504 | <i>LINC00538</i>  | 2.096 | 0 |
| adult | 1q41   | 214161277 | 214214847 | 5629      | <i>PROX1</i>      | 2.096 | 0 |
| adult | 1q32.3 | 214454564 | 214510477 | 56950     | <i>SMYD2</i>      | 2.096 | 0 |
| adult | 1q32.2 | 214522038 | 214725024 | 5784      | <i>PTPN14</i>     | 2.096 | 0 |
| adult | 1q41   | 214776531 | 214837914 | 1063      | <i>CENPF</i>      | 2.096 | 0 |
| adult | 1q41   | 215178884 | 215410436 | 3776      | <i>KCNK2</i>      | 2.096 | 0 |
| adult | 1q41   | 215740734 | 215795149 | 51133     | <i>KCTD3</i>      | 2.09  | 0 |
| adult | 1q41   | 215796235 | 216596738 | 7399      | <i>USH2A</i>      | 2.09  | 0 |
| adult | 1q41   | 216676587 | 216896814 | 2104      | <i>ESRRG</i>      | 2.09  | 0 |
| adult | 1q41   | 217600334 | 217804444 | 55105     | <i>GPATCH2</i>    | 2.09  | 0 |
| adult | 1q41   | 217804665 | 218041495 | 128153    | <i>SPATA17</i>    | 2.09  | 0 |
| adult | 1q41   | 218066241 | 218094146 | 100885798 | <i>LINC00210</i>  | 2.09  | 0 |
| adult | 1q41   | 218458628 | 218511325 | 51018     | <i>RRP15</i>      | 2.09  | 0 |
| adult | 1q41   | 218518675 | 218617961 | 7042      | <i>TGFB2</i>      | 2.09  | 0 |
| adult | 1q41   | 219347172 | 219386207 | 127018    | <i>LYPLAL1</i>    | 2.09  | 0 |
| adult | 1p34.1 | 220046618 | 220292777 | 26828     | <i>RNU5F-1</i>    | 2.09  | 0 |
| adult | 1q41   | 220087605 | 220101993 | 55532     | <i>SLC30A10</i>   | 2.09  | 0 |
| adult | 1q41   | 220141941 | 220220000 | 2058      | <i>EPRS</i>       | 2.09  | 0 |
| adult | 1q41   | 220230823 | 220263195 | 10380     | <i>BPNT1</i>      | 2.09  | 0 |
| adult | 1q41   | 220267454 | 220321383 | 55699     | <i>IARS2</i>      | 2.09  | 0 |
| adult | 1q41   | 220291194 | 220291304 | 406997    | <i>MIR215</i>     | 2.09  | 0 |
| adult | 1q41   | 220291498 | 220291583 | 406969    | <i>MIR194-1</i>   | 2.09  | 0 |
| adult | 1q41   | 220321609 | 220445843 | 25782     | <i>RAB3GAP2</i>   | 2.09  | 0 |
| adult | 1q41   | 220373887 | 220374018 | 677818    | <i>SNORA36B</i>   | 2.09  | 0 |

|       |            |           |           |           |                 |        |   |
|-------|------------|-----------|-----------|-----------|-----------------|--------|---|
| adult | 1q41       | 220439520 | 220441057 | 6791      | <i>AURKAPSI</i> | 2.09   | 0 |
| adult | 1q41       | 220701524 | 220837799 | 4139      | <i>MARK1</i>    | 1.8804 | 0 |
| adult | 1q41       | 220863627 | 220872499 | 79762     | <i>C1orf115</i> | 1.8804 | 0 |
| adult | 1q41       | 220921587 | 220958157 | 54996     | <i>2-Mar</i>    | 1.8804 | 0 |
| adult | 1q41       | 220960038 | 220987741 | 64757     | <i>1-Mar</i>    | 1.8804 | 0 |
| adult | 1q41       | 221052742 | 221058400 | 3142      | <i>HLX</i>      | 1.8804 | 0 |
| adult | 1q41       | 221503269 | 221509638 | 400804    | <i>C1orf140</i> | 1.8804 | 0 |
| adult | 1q41       | 221874761 | 221915518 | 11221     | <i>DUSP10</i>   | 1.8881 | 0 |
| adult | 1q41       | 222695601 | 222721444 | 79802     | <i>HHIPL2</i>   | 1.8634 | 0 |
| adult | 1q42       | 222731243 | 222763275 | 9015      | <i>TAF1A</i>    | 1.8634 | 0 |
| adult | 1q41       | 222791443 | 222841354 | 375056    | <i>MIA3</i>     | 1.8634 | 0 |
| adult | 1q41       | 222841354 | 222885864 | 64853     | <i>AIDA</i>     | 1.8634 | 0 |
| adult | 1q41       | 222885894 | 222908538 | 148362    | <i>BROX</i>     | 1.8634 | 0 |
| adult | 1q41       | 222910557 | 222924002 | 400823    | <i>FAM177B</i>  | 1.8634 | 0 |
| adult | 1q41       | 222988430 | 223179337 | 84976     | <i>DISP1</i>    | 1.8634 | 0 |
| adult | 1q41-q42   | 223282747 | 223316624 | 7100      | <i>TLR5</i>     | 1.8634 | 0 |
| adult | 1q41       | 223394160 | 223537544 | 55061     | <i>SUSD4</i>    | 1.8634 | 0 |
| adult | 1q41       | 223714971 | 223853436 | 388743    | <i>CAPN8</i>    | 1.8634 | 0 |
| adult | 1q41-q42   | 223889294 | 223963720 | 824       | <i>CAPN2</i>    | 1.8634 | 0 |
| adult | 1q41       | 223967594 | 224033674 | 7159      | <i>TP53BP2</i>  | 1.8634 | 0 |
| adult | 1q42.11    | 224301788 | 224349749 | 23219     | <i>FBXO28</i>   | 1.8634 | 0 |
| adult | 1q42.11    | 224370909 | 224381142 | 8560      | <i>DEGS1</i>    | 1.6543 | 0 |
| adult | 1q41-q42.2 | 224415035 | 224517891 | 4931      | <i>NVL</i>      | 1.8699 | 0 |
| adult | 1q42.11    | 224444705 | 224444843 | 100313769 | <i>MIR320B2</i> | 1.8699 | 0 |
| adult | 1q42.11    | 224544512 | 224564586 | 29097     | <i>CNIH4</i>    | 1.8699 | 0 |
| adult | 1q42.13    | 224572844 | 224622001 | 80232     | <i>WDR26</i>    | 1.8699 | 0 |
| adult | 1q42.12    | 224804178 | 224928249 | 149111    | <i>CNIH3</i>    | 1.8699 | 0 |
| adult | 1q42.12    | 225117355 | 225211991 | 127602    | <i>DNAH14</i>   | 1.8699 | 0 |
| adult | 1q42.1     | 225589203 | 225615815 | 3930      | <i>LBR</i>      | 1.8699 | 0 |
| adult | 1q42.12    | 225674533 | 225840845 | 55740     | <i>ENAH</i>     | 1.8699 | 0 |
| adult | 1q42.12    | 225965514 | 225978168 | 6726      | <i>SRP9</i>     | 1.8699 | 0 |
| adult | 1q42.1     | 225997775 | 226033262 | 2052      | <i>EPHX1</i>    | 1.8699 | 0 |
| adult | 1q42.12    | 226033232 | 226070420 | 9725      | <i>TMEM63A</i>  | 1.8699 | 0 |



|       |          |           |           |           |                     |        |   |
|-------|----------|-----------|-----------|-----------|---------------------|--------|---|
| adult | 1q42.1   | 226073981 | 226076846 | 10637     | <i>LEFTY1</i>       | 1.8699 | 0 |
| adult | 1q42.12  | 226107576 | 226112040 | 29920     | <i>PYCR2</i>        | 1.8699 | 0 |
| adult | 1q42.1   | 226124297 | 226129083 | 7044      | <i>LEFTY2</i>       | 1.8699 | 0 |
| adult | 1q42.12  | 226170402 | 226187066 | 163859    | <i>SDE2</i>         | 1.8699 | 0 |
| adult | 1q42.12  | 226332379 | 226374423 | 64746     | <i>ACBD3</i>        | 1.8699 | 0 |
| adult | 1q42.12  | 226411318 | 226414756 | 83881     | <i>MIXL1</i>        | 1.8699 | 0 |
| adult | 1q42.12  | 226418849 | 226497204 | 286826    | <i>LIN9</i>         | 1.8699 | 0 |
| adult | 1q41-q42 | 226548391 | 226595801 | 142       | <i>PARP1</i>        | 1.8699 | 0 |
| adult | 1q42.12  | 226736500 | 226796915 | 375057    | <i>C1orf95</i>      | 1.8699 | 0 |
| adult | 1q42.13  | 226819390 | 226926876 | 3707      | <i>ITPKB</i>        | 1.8699 | 0 |
| adult | 1q42.13  | 227058272 | 227083804 | 5664      | <i>PSEN2</i>        | 1.8699 | 0 |
| adult | 1q42.13  | 227127937 | 227175246 | 56997     | <i>ADCK3</i>        | 1.8699 | 0 |
| adult | 1q42.11  | 227177565 | 227505826 | 8476      | <i>CDC42BPA</i>     | 1.8699 | 0 |
| adult | 1q42.13  | 227751219 | 227850164 | 339500    | <i>ZNF678</i>       | 1.8699 | 0 |
| adult | 1q42.13  | 227884732 | 227885408 | 401983    | <i>ZNF847P</i>      | 1.8699 | 0 |
| adult | 1q42.13  | 227916239 | 227922055 | 100130093 | <i>LOC100130093</i> | 1.8699 | 0 |
| adult | 1q42.13  | 227918889 | 227923112 | 65094     | <i>JMJD4</i>        | 1.8699 | 0 |
| adult | 1q42.13  | 227922696 | 227968932 | 116841    | <i>SNAP47</i>       | 1.8699 | 0 |
| adult | 1q42.13  | 228003417 | 228034171 | 339501    | <i>PRSS38</i>       | 1.6543 | 0 |
| adult | 1q42     | 228109164 | 228135676 | 7483      | <i>WNT9A</i>        | 1.6543 | 0 |
| adult | 1q42     | 228194722 | 228248972 | 89780     | <i>WNT3A</i>        | 1.6543 | 0 |
| adult | 1q42     | 228270360 | 228286913 | 375       | <i>ARF1</i>         | 1.6543 | 0 |
| adult | 1q42.13  | 228288427 | 228291163 | 79169     | <i>C1orf35</i>      | 1.6543 | 0 |
| adult | 1q42.13  | 228294379 | 228297013 | 128308    | <i>MRPL55</i>       | 1.6543 | 0 |
| adult | 1q32-q41 | 228327784 | 228336655 | 2987      | <i>GUK1</i>         | 1.6543 | 0 |
| adult | 1q42.13  | 228337414 | 228347527 | 57165     | <i>GJC2</i>         | 1.6543 | 0 |
| adult | 1q42.13  | 228353508 | 228369958 | 200205    | <i>IBA57</i>        | 1.6543 | 0 |
| adult | 1q42.13  | 228391206 | 228401356 | 574407    | <i>C1orf145</i>     | 1.6543 | 0 |
| adult | 1q42.13  | 228395830 | 228548951 | 84033     | <i>OBSCN</i>        | 1.6543 | 0 |
| adult | 1q42.13  | 228581376 | 228594517 | 81559     | <i>TRIM11</i>       | 1.6543 | 0 |
| adult | 1q42     | 228595635 | 228604583 | 51127     | <i>TRIM17</i>       | 1.6543 | 0 |
| adult | 1q42     | 228612545 | 228613026 | 8290      | <i>HIST3H3</i>      | 1.6543 | 0 |
| adult | 1q42.13  | 228645064 | 228645560 | 92815     | <i>HIST3H2A</i>     | 1.6543 | 0 |

|       |               |           |           |           |                  |        |   |
|-------|---------------|-----------|-----------|-----------|------------------|--------|---|
| adult | 1q42.13       | 228645807 | 228646259 | 128312    | <i>HIST3H2BB</i> | 1.6543 | 0 |
| adult | 1q42.13       | 228675067 | 228683889 | 149603    | <i>RNF187</i>    | 1.6543 | 0 |
| adult | 1q42.11-q42.3 | 228780393 | 228882416 | 58480     | <i>RHOU</i>      | 1.4238 | 0 |
| adult | 1q42.13       | 228780656 | 228788159 | 574029    | <i>DUSP5P1</i>   | 1.1273 | 0 |
| adult | 4q32.2        | 229310429 | 229310548 | 100616234 | <i>MIR4454</i>   | 1.4238 | 0 |
| adult | 1q42-q43      | 229406808 | 229441640 | 5867      | <i>RAB4A</i>     | 1.4238 | 0 |
| adult | 1q42.13       | 229440128 | 229441250 | 10638     | <i>SPHAR</i>     | 1.4238 | 0 |
| adult | 1q42.13       | 229456751 | 229478688 | 126731    | <i>CCSAP</i>     | 1.4238 | 0 |
| adult | 1q42.13       | 229566992 | 229569843 | 58        | <i>ACTA1</i>     | 1.4238 | 0 |
| adult | 1q42.13       | 229577043 | 229644088 | 55746     | <i>NUP133</i>    | 1.4238 | 0 |
| adult | 1q42.13       | 229652328 | 229694442 | 23456     | <i>ABCB10</i>    | 1.4238 | 0 |
| adult | 1q42.13       | 229728865 | 229761794 | 27097     | <i>TAF5L</i>     | 1.4238 | 0 |
| adult | 1q42.13       | 229761962 | 229795947 | 9816      | <i>URB2</i>      | 1.4238 | 0 |
| adult | 1q41-q42      | 230202941 | 230417876 | 2590      | <i>GALNT2</i>    | 1.4853 | 0 |
| adult | 1q42.13       | 230457391 | 230561674 | 79605     | <i>PGBD5</i>     | 1.4853 | 0 |
| adult | 1q42.2        | 230778201 | 230829731 | 22796     | <i>COG2</i>      | 1.4853 | 0 |
| adult | 1q42.2        | 230838271 | 230850336 | 183       | <i>AGT</i>       | 1.4853 | 0 |
| adult | 1q42.11-q42.3 | 230883129 | 230937518 | 10753     | <i>CAPN9</i>     | 1.4853 | 0 |
| adult | 1q42.2        | 230972864 | 230991782 | 84886     | <i>C1orf198</i>  | 1.4853 | 0 |
| adult | 1q42.2        | 231041986 | 231114618 | 79573     | <i>TTC13</i>     | 1.4853 | 0 |
| adult | 1q42.2        | 231114822 | 231136479 | 64801     | <i>ARV1</i>      | 1.4853 | 0 |
| adult | 1q42.2        | 231154703 | 231175995 | 375061    | <i>FAM89A</i>    | 1.4853 | 0 |
| adult | 1q42.2        | 231155573 | 231155670 | 100302132 | <i>MIR1182</i>   | 1.4853 | 0 |
| adult | 1q42.2        | 231298673 | 231357314 | 440730    | <i>TRIM67</i>    | 1.4853 | 0 |
| adult | 1q42.2        | 231319844 | 231323373 | 149373    | <i>LOC149373</i> | 1.4853 | 0 |
| adult | 1q42.2        | 231359508 | 231376933 | 128061    | <i>C1orf131</i>  | 1.4853 | 0 |
| adult | 1q42          | 231376918 | 231413719 | 8443      | <i>GNPAT</i>     | 1.4853 | 0 |
| adult | 1q42.2        | 231468476 | 231473618 | 149371    | <i>EXOC8</i>     | 1.4853 | 0 |
| adult | 1q42.12-q43   | 231473681 | 231490773 | 83932     | <i>SPRTN</i>     | 1.4853 | 0 |
| adult | 1q42.1        | 231499496 | 231560790 | 54583     | <i>EGLN1</i>     | 1.4853 | 0 |
| adult | 1q42.2        | 231611509 | 231612271 | 645339    | <i>SNRPD2P2</i>  | 1.4853 | 0 |
| adult | 1q42.1        | 231664398 | 231702269 | 7257      | <i>TSNAX</i>     | 1.4853 | 0 |
| adult | 1q42.2        | 231727037 | 231747836 | 100287814 | <i>LINC00582</i> | 1.4853 | 0 |

|       |              |           |           |           |                   |         |   |
|-------|--------------|-----------|-----------|-----------|-------------------|---------|---|
| adult | 1q42.1       | 231762560 | 231859820 | 27185     | <i>DISC1</i>      | 1.4853  | 0 |
| adult | 1q42.1       | 231950371 | 231954263 | 27184     | <i>DISC2</i>      | 1.4853  | 0 |
| adult | 1q42.2       | 232533711 | 232651354 | 57568     | <i>SIPAIL2</i>    | 1.4853  | 0 |
| adult | 1q42.2       | 232940637 | 232946092 | 54627     | <i>MAP10</i>      | 1.4853  | 0 |
| adult | 1q42.2       | 233086369 | 233114219 | 84284     | <i>NTPCR</i>      | 1.4853  | 0 |
| adult | 1q42.2       | 233119881 | 233431459 | 80003     | <i>PCNXL2</i>     | 1.4853  | 0 |
| adult | 1q42         | 233463513 | 233520894 | 84451     | <i>KIAA1804</i>   | 1.4853  | 0 |
| adult | 1q42-q43     | 233749749 | 233808258 | 3775      | <i>KCNK1</i>      | 1.4853  | 0 |
| adult | 1q42.2       | 234040457 | 234460264 | 148641    | <i>SLC35F3</i>    | 1.7084  | 0 |
| adult | 1q42.2       | 234509182 | 234519795 | 388753    | <i>COA6</i>       | 1.7413  | 0 |
| adult | 1q42.3       | 234527058 | 234614849 | 6894      | <i>TARBP1</i>     | 1.7413  | 0 |
| adult | 1q42.3       | 234740014 | 234745271 | 359948    | <i>IRF2BP2</i>    | 1.2229  | 0 |
| adult | 1q42.3       | 234765056 | 234770526 | 100302691 | <i>LINC00184</i>  | 1.4536  | 0 |
| adult | 1q42         | 235272657 | 235292256 | 9804      | <i>TOMM20</i>     | 1.4536  | 0 |
| adult | 1q42.3       | 235291117 | 235291252 | 677802    | <i>SNORA14B</i>   | 1.4536  | 0 |
| adult | 1q42.3       | 235294497 | 235324571 | 23029     | <i>RBM34</i>      | 1.4536  | 0 |
| adult | 1q42.3       | 235330209 | 235490802 | 51742     | <i>ARID4B</i>     | 1.4536  | 0 |
| adult | 1q43         | 235491752 | 235507844 | 9453      | <i>GGPS1</i>      | 1.4536  | 0 |
| adult | 1q42.3       | 235530674 | 235612283 | 6905      | <i>TBCE</i>       | 1.4536  | 0 |
| adult | 1q42.3       | 235610504 | 235667781 | 148789    | <i>B3GALNT2</i>   | 1.4536  | 0 |
| adult | 1q42.3       | 235710984 | 235813293 | 2786      | <i>GNG4</i>       | 1.4536  | 0 |
| adult | 1q42.1-q42.2 | 235824330 | 236030227 | 1130      | <i>LYST</i>       | 1.4536  | 0 |
| adult | 1q43         | 236139131 | 236228481 | 4811      | <i>NID1</i>       | 1.4536  | 0 |
| adult | 1q42-q43     | 236305831 | 236372209 | 7107      | <i>GPRI37B</i>    | 1.4536  | 0 |
| adult | 1q42.2-q43   | 236378421 | 236445339 | 56605     | <i>ERO1LB</i>     | 1.4536  | 0 |
| adult | 1q42.3       | 236557679 | 236648008 | 128178    | <i>EDARADD</i>    | 1.70445 | 0 |
| adult | 1q43         | 236681513 | 236716279 | 3964      | <i>LGALS8</i>     | 1.759   | 0 |
| adult | 1q43         | 236686368 | 236687808 | 100287902 | <i>LGALS8-AS1</i> | 1.759   | 0 |
| adult | 1q43         | 236712304 | 236767841 | 55127     | <i>HEATR1</i>     | 1.759   | 0 |
| adult | 1q42-q43     | 236849753 | 236927927 | 88        | <i>ACTN2</i>      | 1.786   | 0 |
| adult | 1q43         | 236958580 | 237067281 | 4548      | <i>MTR</i>        | 1.813   | 0 |
| adult | 1q43         | 237167402 | 237167718 | 645745    | <i>MTIHL1</i>     | 1.813   | 0 |
| adult | 1q43         | 237205701 | 237997288 | 6262      | <i>RYR2</i>       | 1.5996  | 0 |

|       |          |           |           |           |                     |         |         |
|-------|----------|-----------|-----------|-----------|---------------------|---------|---------|
| adult | 1q43     | 238025474 | 238091619 | 100130331 | <i>LOC100130331</i> | 1.5996  | 0       |
| adult | 1q43     | 238041163 | 238054222 | 57829     | <i>ZP4</i>          | 1.5996  | 0       |
| adult | 1q43     | 239792372 | 240072717 | 1131      | <i>CHRM3</i>        | 1.5996  | 0       |
| adult | 1q43     | 240170823 | 240176560 | 645884    | <i>RPS7P5</i>       | 1.5996  | 0       |
| adult | 1q43     | 240255184 | 240638489 | 56776     | <i>FMN2</i>         | 1.5719  | 0       |
| adult | 1q43     | 240652872 | 240775462 | 64388     | <i>GREM2</i>        | 1.3514  | 0       |
| adult | 1q43     | 240938813 | 241520530 | 6000      | <i>RGS7</i>         | 1.3514  | 0       |
| adult | 1q42.1   | 241660856 | 241683085 | 2271      | <i>FH</i>           | 1.3514  | 0       |
| adult | 1q42-q44 | 241695433 | 241758949 | 8564      | <i>KMO</i>          | 1.3514  | 0       |
| adult | 1q43     | 241756451 | 241803701 | 23596     | <i>OPN3</i>         | 1.3514  | 0       |
| adult | 1q43     | 241792166 | 241799232 | 1122      | <i>CHML</i>         | 1.3514  | 0       |
| adult | 1q43     | 241815579 | 241965434 | 128025    | <i>WDR64</i>        | 1.3514  | 0       |
| adult | 1q43     | 242011492 | 242053241 | 9156      | <i>EXO1</i>         | 1.3514  | 0       |
| adult | 1q43     | 242158791 | 242162385 | 440738    | <i>MAP1LC3C</i>     | 1.3514  | 0       |
| adult | 1q43     | 242251688 | 242612784 | 200150    | <i>PLD5</i>         | 1.3514  | 0       |
| adult | 1q44     | 243287729 | 243418708 | 9859      | <i>CEP170</i>       | 1.3514  | 0       |
| adult | 1q43     | 243419306 | 243663393 | 10806     | <i>SDCCAG8</i>      | 1.3514  | 0       |
| adult | 1q44     | 243651534 | 244006584 | 10000     | <i>AKT3</i>         | 1.33005 | -0.3109 |
| adult | 1q44     | 244080703 | 244210619 | 339529    | <i>LOC339529</i>    | 1.3087  | -0.3109 |
| adult | 1q44     | 244212240 | 244220780 | 10472     | <i>ZBTB18</i>       | 1.3087  | -0.3109 |
| adult | 1q44     | 244515936 | 244552388 | 200159    | <i>C1orf100</i>     | 1.081   | 0       |
| adult | 1q44     | 244571793 | 244615436 | 159       | <i>ADSS</i>         | 1.081   | 0       |
| adult | 1q44     | 244624672 | 244803662 | 257044    | <i>C1orf101</i>     | 1.081   | 0       |
| adult | 1q44     | 244816349 | 244872336 | 51029     | <i>DESI2</i>        | 1.081   | 0       |
| adult | 1q44     | 244998630 | 245008365 | 116228    | <i>COX20</i>        | 1.081   | 0       |
| adult | 1q44     | 245013601 | 245027827 | 3192      | <i>HNRNPU</i>       | 1.081   | 0       |
| adult | 1q44     | 245133170 | 245251148 | 84288     | <i>EFCAB2</i>       | 1.081   | 0       |
| adult | 1q44     | 245318286 | 245866428 | 55083     | <i>KIF26B</i>       | 1.081   | 0       |
| adult | 1q44     | 245912641 | 246580714 | 64754     | <i>SMYD3</i>        | 1.081   | 0       |
| adult | 1q44     | 246679340 | 246687589 | 255654    | <i>LOC255654</i>    | 1.081   | 0       |
| adult | 1q44     | 246703862 | 246729565 | 64216     | <i>TFB2M</i>        | 1.0963  | 0       |
| adult | 1q44     | 246729638 | 246811544 | 163882    | <i>CNST</i>         | 1.0963  | 0       |
| adult | 1q44     | 246887377 | 246931440 | 51097     | <i>SCCPDH</i>       | 1.0963  | 0       |

|       |      |           |           |           |                      |        |   |
|-------|------|-----------|-----------|-----------|----------------------|--------|---|
| adult | 1q44 | 247002401 | 247094726 | 25909     | <i>AHCTF1</i>        | 1.0963 | 0 |
| adult | 1q44 | 247108848 | 247171395 | 57116     | <i>ZNF695</i>        | 1.0963 | 0 |
| adult | 1q   | 247108848 | 247242115 | 100533111 | <i>ZNF670-ZNF695</i> | 1.0963 | 0 |
| adult | 1q44 | 247197939 | 247242115 | 93474     | <i>ZNF670</i>        | 1.0963 | 0 |
| adult | 1q44 | 247263263 | 247267674 | 79862     | <i>ZNF669</i>        | 1.0963 | 0 |
| adult | 1q44 | 247273461 | 247275719 | 388759    | <i>C1orf229</i>      | 1.0963 | 0 |
| adult | 1q44 | 247285276 | 247335319 | 7678      | <i>ZNF124</i>        | 1.1104 | 0 |
| adult | 1q44 | 247419373 | 247420447 | 317705    | <i>VN1R5</i>         | 1.1104 | 0 |
| adult | 1q44 | 247463621 | 247495045 | 84838     | <i>ZNF496</i>        | 1.1104 | 0 |
| adult | 1q44 | 247579457 | 247612406 | 114548    | <i>NLRP3</i>         | 1.3244 | 0 |
| adult | 1q44 | 247614330 | 247615284 | 127623    | <i>OR2B11</i>        | 1.3244 | 0 |
| adult | 1q44 | 247654369 | 247655711 | 441932    | <i>OR2W5</i>         | 1.3244 | 0 |
| adult | 1q44 | 247687980 | 247694106 | 148824    | <i>GCSAML-ASI</i>    | 1.3244 | 0 |
| adult | 1q44 | 247693433 | 247697141 | 81472     | <i>OR2C3</i>         | 1.3244 | 0 |
| adult | 1q44 | 247712346 | 247740992 | 148823    | <i>GCSAML</i>        | 1.3244 | 0 |
| adult | 1q44 | 247751661 | 247752615 | 81470     | <i>OR2G2</i>         | 1.3244 | 0 |
| adult | 1q44 | 247768887 | 247769817 | 81469     | <i>OR2G3</i>         | 1.3244 | 0 |
| adult | 1q44 | 247835419 | 247836343 | 441933    | <i>OR13G1</i>        | 1.3244 | 0 |
| adult | 1q44 | 247875130 | 247876057 | 343169    | <i>OR6F1</i>         | 1.3244 | 0 |
| adult | 1q44 | 247920763 | 247921708 | 26188     | <i>OR1C1</i>         | 1.3244 | 0 |
| adult | 1q44 | 247978101 | 247979031 | 284532    | <i>OR14A16</i>       | 1.3244 | 0 |
| adult | 1q44 | 248004229 | 248005198 | 391189    | <i>OR11L1</i>        | 1.3244 | 0 |
| adult | 1q44 | 248020500 | 248043438 | 25893     | <i>TRIM58</i>        | 1.3244 | 0 |
| adult | 1q44 | 248084319 | 248085258 | 343172    | <i>OR2T8</i>         | 1.3244 | 0 |
| adult | 1q44 | 248100330 | 248264224 | 284521    | <i>OR2L13</i>        | 1.1135 | 0 |
| adult | 1q44 | 248112159 | 248113098 | 391190    | <i>OR2L8</i>         | 1.3244 | 0 |
| adult | 1q44 | 248128633 | 248129641 | 391191    | <i>OR2AK2</i>        | 1.3244 | 0 |
| adult | 1q44 | 248153568 | 248154493 | 26247     | <i>OR2L1P</i>        | 1.3244 | 0 |
| adult | 1q44 | 248185249 | 248186188 | 81466     | <i>OR2L5</i>         | 1.1135 | 0 |
| adult | 1q44 | 248201473 | 248202607 | 26246     | <i>OR2L2</i>         | 1.1135 | 0 |
| adult | 1q44 | 248223983 | 248224922 | 391192    | <i>OR2L3</i>         | 1.1135 | 0 |
| adult | 1q44 | 248285437 | 248286082 | 388762    | <i>OR2M1P</i>        | 1.1135 | 0 |
| adult | 1q44 | 248308449 | 248309388 | 127059    | <i>OR2M5</i>         | 1.1135 | 0 |

|       |           |           |           |           |                |        |         |
|-------|-----------|-----------|-----------|-----------|----------------|--------|---------|
| adult | 1q44      | 248343287 | 248344331 | 391194    | <i>OR2M2</i>   | 1.1135 | 0       |
| adult | 1q44      | 248366369 | 248367308 | 127062    | <i>OR2M3</i>   | 1.1135 | 0       |
| adult | 1q44      | 248402230 | 248403166 | 26245     | <i>OR2M4</i>   | 1.1135 | 0       |
| adult | 1q44      | 248436153 | 248437116 | 391195    | <i>OR2T33</i>  | 1.1135 | 0       |
| adult | 1q44      | 248457917 | 248458880 | 127064    | <i>OR2T12</i>  | 1.1135 | 0       |
| adult | 1q44      | 248486931 | 248487870 | 391196    | <i>OR2M7</i>   | 1.1135 | 0       |
| adult | 1q44      | 248512076 | 248513015 | 127066    | <i>OR14C36</i> | 1.1135 | 0       |
| adult | 1q44      | 248524882 | 248525929 | 127074    | <i>OR2T4</i>   | 1.1135 | 0       |
| adult | 1q44      | 248550909 | 248551836 | 254879    | <i>OR2T6</i>   | 1.1135 | 0       |
| adult | 1q44      | 248569295 | 248570405 | 26696     | <i>OR2T1</i>   | 1.1135 | 0       |
| adult | 1q44      | 248616098 | 248617073 | 401992    | <i>OR2T2</i>   | 1.0877 | 0       |
| adult | 1q44      | 248636651 | 248637608 | 343173    | <i>OR2T3</i>   | 1.0877 | 0       |
| adult | 1q44      | 248651889 | 248652837 | 401993    | <i>OR2T5</i>   | 1.0877 | 0       |
| adult | 1q44      | 248684947 | 248685898 | 391211    | <i>OR2G6</i>   | 1.0877 | 0       |
| adult | 1q44      | 248721844 | 248722792 | 343563    | <i>OR2T29</i>  | 1.0877 | 0       |
| adult | 1q44      | 248737101 | 248738058 | 127068    | <i>OR2T34</i>  | 1.0877 | 0       |
| adult | 1q44      | 248756130 | 248757069 | 127069    | <i>OR2T10</i>  | 1.0877 | 0       |
| adult | 1q44      | 248789478 | 248790429 | 127077    | <i>OR2T11</i>  | 1.0877 | 0       |
| adult | 1q44      | 248801587 | 248802559 | 403244    | <i>OR2T35</i>  | 1.0877 | 0       |
| adult | 1q44      | 248813231 | 248814185 | 403239    | <i>OR2T27</i>  | 1.0877 | 0       |
| adult | 1q44      | 248844669 | 248845605 | 401994    | <i>OR14I1</i>  | 1.0877 | 0       |
| adult | 1q44      | 248902716 | 248903151 | 646627    | <i>LYPD8</i>   | 1.0877 | 0       |
| adult | 1q44      | 249104650 | 249120154 | 80851     | <i>SH3BP5L</i> | 1.0877 | 0       |
| adult | 1q44      | 249132376 | 249143716 | 79894     | <i>ZNF672</i>  | 1.0877 | 0       |
| adult | 1q44      | 249144202 | 249153125 | 55657     | <i>ZNF692</i>  | 1.0877 | 0       |
| adult | 12p13-p12 | 10004967  | 10022458  | 9976      | <i>CLEC2B</i>  | 0.2932 | -1.5326 |
| adult | 12p13     | 10034087  | 10048432  | 100431172 | <i>KLRF2</i>   | 0.2932 | -1.5326 |
| adult | 12p13.31  | 10065825  | 10084980  | 387836    | <i>CLEC2A</i>  | 0.2932 | -1.5326 |
| adult | 12p13.2   | 10103914  | 10138194  | 160364    | <i>CLEC12A</i> | 0.2932 | -1.5326 |
| adult | 12p13.2   | 10145661  | 10151899  | 51266     | <i>CLEC1B</i>  | 0.2932 | -1.5326 |
| adult | 12p13.2   | 10163230  | 10170548  | 387837    | <i>CLEC12B</i> | 0.2932 | -1.5326 |
| adult | 12p13.2   | 10183275  | 10218629  | 283420    | <i>CLEC9A</i>  | 0.2932 | -1.5326 |
| adult | 12p13.2   | 10222152  | 10251664  | 51267     | <i>CLEC1A</i>  | 0.2932 | -1.5326 |

|       |               |          |          |           |                    |        |         |
|-------|---------------|----------|----------|-----------|--------------------|--------|---------|
| adult | 12p13.2       | 10269375 | 10282868 | 64581     | <i>CLEC7A</i>      | 0.2932 | -1.5326 |
| adult | 12p13.2-p12.3 | 10310898 | 10324790 | 4973      | <i>OLR1</i>        | 0.2932 | -1.5326 |
| adult | 12p13.2       | 10331556 | 10344403 | 120939    | <i>TMEM52B</i>     | 0.2932 | -1.5326 |
| adult | 12p13.2       | 10365488 | 10375724 | 23710     | <i>GABARAPL1</i>   | 0.2932 | -1.5326 |
| adult | 12p13         | 10457049 | 10469850 | 3824      | <i>KLRD1</i>       | 0.2932 | -1.5326 |
| adult | 12p13.2-p12.3 | 10524951 | 10542653 | 22914     | <i>KLRK1</i>       | 0.2932 | -1.5326 |
| adult | 12p           | 10524951 | 10562745 | 100528032 | <i>KLRC4-KLRK1</i> | 0.2932 | -1.5326 |
| adult | 12p13.2-p12.3 | 10559982 | 10562356 | 8302      | <i>KLRC4</i>       | 0.2932 | -1.5326 |
| adult | 12p13         | 10564913 | 10573194 | 3823      | <i>KLRC3</i>       | 0.2932 | -1.5326 |
| adult | 12p13.2       | 10741076 | 10752434 | 10748     | <i>KLRAP1</i>      | 0.2932 | -1.5459 |
| adult | 12p13.2       | 10756363 | 10766208 | 55110     | <i>MAGOHB</i>      | 0.2932 | -1.5459 |
| adult | 12p13.2       | 10771537 | 10826891 | 55359     | <i>STYK1</i>       | 0.2932 | -1.5459 |
| adult | 12p13.1       | 10851675 | 10875953 | 8531      | <i>YBX3</i>        | 0.2932 | -1.5459 |
| adult | 12p13         | 10954130 | 10955226 | 50837     | <i>TAS2R7</i>      | 0.2932 | -1.5459 |
| adult | 12p13         | 10958649 | 10959579 | 50836     | <i>TAS2R8</i>      | 0.2932 | -1.8088 |
| adult | 12p13         | 10961692 | 10962767 | 50835     | <i>TAS2R9</i>      | 0.2932 | -1.8088 |
| adult | 12p13         | 10977944 | 10978868 | 50839     | <i>TAS2R10</i>     | 0.2932 | -1.8088 |
| adult | 12p13         | 10998447 | 11002075 | 11272     | <i>PRR4</i>        | 0.2932 | -1.8088 |
| adult | 12p           | 10998447 | 11324224 | 100533464 | <i>PRH1-PRR4</i>   | 0.2932 | -1.8317 |
| adult | 12p13         | 11060524 | 11062161 | 50838     | <i>TAS2R13</i>     | 0.2932 | -1.8088 |
| adult | 12p13.2       | 11081834 | 11087444 | 5555      | <i>PRH2</i>        | 0.2932 | -1.8088 |
| adult | 12p13         | 11090852 | 11091806 | 50840     | <i>TAS2R14</i>     | 0.2932 | -1.8088 |
| adult | 12p13.2       | 11138511 | 11139511 | 259296    | <i>TAS2R50</i>     | 0.2932 | -1.8088 |
| adult | 12p13.2       | 11148560 | 11150474 | 259295    | <i>TAS2R20</i>     | 0.2932 | -1.8088 |
| adult | 12p13.2       | 11174217 | 11175219 | 259294    | <i>TAS2R19</i>     | 0.2932 | -2.1407 |
| adult | 12p13.2       | 11182985 | 11184006 | 259290    | <i>TAS2R31</i>     | 0.2932 | -2.1407 |
| adult | 12p13.2       | 11213963 | 11214893 | 259292    | <i>TAS2R46</i>     | 0.2932 | -1.8738 |
| adult | 12p13.2       | 11243885 | 11244912 | 259289    | <i>TAS2R43</i>     | 0.2932 | -1.8738 |
| adult | 12p13.2       | 11285883 | 11286843 | 259293    | <i>TAS2R30</i>     | 0.2932 | -2.1865 |
| adult | 12p13         | 11338598 | 11339543 | 353164    | <i>TAS2R42</i>     | 0.2932 | -2.1865 |
| adult | 12p13.2       | 11418846 | 11422641 | 5544      | <i>PRB3</i>        | 0.2932 | -2.1865 |
| adult | 12p13.2       | 11460014 | 11463369 | 5545      | <i>PRB4</i>        | 0.2932 | -2.1865 |
| adult | 12p13.2       | 11504756 | 11508524 | 5542      | <i>PRB1</i>        | 0.2932 | -2.1865 |

|       |             |          |          |        |                  |        |         |
|-------|-------------|----------|----------|--------|------------------|--------|---------|
| adult | 12p13.2     | 11544473 | 11548498 | 653247 | <i>PRB2</i>      | 0.2932 | -2.1865 |
| adult | 12p13       | 11802787 | 12048325 | 2120   | <i>ETV6</i>      | 0.2932 | -2.1065 |
| adult | 12p13-p12   | 12223877 | 12252627 | 79370  | <i>BCL2L14</i>   | 0.2932 | -2.3481 |
| adult | 12p13.2     | 12268960 | 12419811 | 4040   | <i>LRP6</i>      | 0.2932 | -2.3811 |
| adult | 12p13.2     | 12482217 | 12503169 | 54682  | <i>MANSC1</i>    | 0.2932 | -2.3811 |
| adult | 12p13.2     | 12508341 | 12510001 | 503693 | <i>LOH12CR2</i>  | 0.2932 | -2.3811 |
| adult | 12p12       | 12510012 | 12619838 | 118426 | <i>LOH12CR1</i>  | 0.2932 | -2.3811 |
| adult | 12p13       | 12626215 | 12715448 | 80824  | <i>DUSP16</i>    | 0.2932 | -2.3811 |
| adult | 12p13       | 12764766 | 12798042 | 1389   | <i>CREBL2</i>    | 0.2932 | -2.3811 |
| adult | 12p12.3     | 12813994 | 12849121 | 2842   | <i>GPR19</i>     | 0.2932 | -2.3811 |
| adult | 12p13.1-p12 | 12870203 | 12875316 | 1027   | <i>CDKN1B</i>    | 0.2932 | -2.3811 |
| adult | 12p13.1     | 12878850 | 12944399 | 81575  | <i>APOLD1</i>    | 0.2932 | -2.3811 |
| adult | 12p13.1     | 12917582 | 12917677 | 693198 | <i>MIR613</i>    | 0.2932 | -2.3811 |
| adult | 12p13.1     | 12966279 | 12982915 | 51202  | <i>DDX47</i>     | 0.2932 | -2.3811 |
| adult | 12p13.1     | 13028410 | 13029070 | 387841 | <i>RPL13AP20</i> | 0.2932 | -2.3811 |
| adult | 12p13.1     | 13043955 | 13066600 | 9052   | <i>GPRC5A</i>    | 0.2932 | -2.3811 |
| adult | 12p13.1     | 13068762 | 13068852 | 693199 | <i>MIR614</i>    | 0.2932 | -2.3811 |
| adult | 12p13.3     | 13093708 | 13103318 | 55507  | <i>GPRC5D</i>    | 0.2932 | -2.3811 |
| adult | 12p13.1     | 13127798 | 13153243 | 50865  | <i>HEBP1</i>     | 0.2932 | -2.3811 |
| adult | 12p13.1     | 13153375 | 13157764 | 93164  | <i>HTR7P1</i>    | 0.2932 | -2.3811 |
| adult | 12p13.1     | 13197314 | 13236383 | 57613  | <i>KIAA1467</i>  | 0.2932 | -2.3811 |
| adult | 12p13.1     | 13236470 | 13248740 | 83445  | <i>GSG1</i>      | 0.2932 | -2.3811 |
| adult | 12p12.3     | 13349601 | 13369708 | 2012   | <i>EMP1</i>      | 0.2932 | -2.3811 |
| adult | 12p12       | 13714409 | 14133022 | 2904   | <i>GRIN2B</i>    | 0.2932 | -2.3811 |
| adult | 12p13.1     | 14518565 | 14655869 | 55729  | <i>ATF7IP</i>    | 0.2932 | -2.0833 |
| adult | 12p13.1     | 14656596 | 14720791 | 79887  | <i>PLBD1</i>     | 0.2932 | -2.1174 |
| adult | 12p12       | 14765567 | 14849519 | 2984   | <i>GUCY2C</i>    | 0.2932 | -2.1174 |
| adult | 12p12.3     | 14923653 | 14924065 | 121504 | <i>HIST4H4</i>   | 0.2932 | -2.1174 |
| adult | 12p12.3     | 14927269 | 14930936 | 55766  | <i>H2AFJ</i>     | 0.2932 | -2.1174 |
| adult | 12p12.3     | 14939411 | 14956401 | 51729  | <i>WBP11</i>     | 0.2932 | -2.1174 |
| adult | 12p12.3     | 14956505 | 14976791 | 144608 | <i>C12orf60</i>  | 0.2932 | -2.1174 |
| adult | 12p12.3     | 14957583 | 14967116 | 440087 | <i>SMCO3</i>     | 0.2932 | -2.1174 |
| adult | 12p13-p12   | 14982244 | 14996413 | 420    | <i>ART4</i>      | 0.2932 | -2.1174 |



|       |               |          |          |           |                     |        |         |
|-------|---------------|----------|----------|-----------|---------------------|--------|---------|
| adult | 12p12.3       | 15034114 | 15038853 | 4256      | <i>MGP</i>          | 0.2932 | -2.1174 |
| adult | 12p12.3       | 15066960 | 15091483 | 121506    | <i>ERP27</i>        | 0.2932 | -2.1174 |
| adult | 12p12.3       | 15094949 | 15114562 | 397       | <i>ARHGD1B</i>      | 0.2932 | -2.1174 |
| adult | 12p13         | 15125955 | 15134799 | 5149      | <i>PDE6H</i>        | 0.2932 | -2.1174 |
| adult | 12p12.3       | 15260715 | 15374411 | 85004     | <i>RERG</i>         | 0.2932 | -2.1174 |
| adult | 12p13.3-p13.2 | 15475190 | 15751265 | 5800      | <i>PTPRO</i>        | 0.2932 | -2.1174 |
| adult | 12p12.3       | 15773074 | 15942510 | 2059      | <i>EPS8</i>         | 0.2932 | -2.1174 |
| adult | 12p12.3       | 16035287 | 16056410 | 11171     | <i>STRAP</i>        | 0.2932 | -1.7948 |
| adult | 12p12.3       | 16064105 | 16190315 | 51071     | <i>DERA</i>         | 0.2932 | -1.7948 |
| adult | 12p12.3       | 16341418 | 16430619 | 729025    | <i>SLC15A5</i>      | 0.2932 | -1.8728 |
| adult | 12p12.3-p12.1 | 16500075 | 16517344 | 4257      | <i>MGST1</i>        | 0.5126 | -1.9508 |
| adult | 12p12.3       | 16701305 | 16758313 | 55885     | <i>LMO3</i>         | 0.5126 | -1.9508 |
| adult | 12p12.3       | 17141680 | 17143562 | 728622    | <i>SKP1P2</i>       | 0.5126 | -1.9508 |
| adult | 12p12.3       | 18233802 | 18243127 | 79785     | <i>RERGL</i>        | 0.2384 | -2.0312 |
| adult | 12p12         | 18414473 | 18801352 | 5288      | <i>PIK3C2G</i>      | 0.2384 | -2.0312 |
| adult | 12p12.3       | 18836109 | 18890993 | 89869     | <i>PLCZ1</i>        | 0.2384 | -2.0312 |
| adult | 12p12.3       | 18891044 | 18892122 | 93661     | <i>CAPZA3</i>       | 0.2384 | -2.0312 |
| adult | 12p12         | 19282625 | 19354937 | 54477     | <i>PLEKHA5</i>      | 0.2384 | -2.0312 |
| adult | 12p12.3       | 19592607 | 19675173 | 121536    | <i>AEBP2</i>        | 0.2384 | -2.0312 |
| adult | 12p12         | 20167618 | 20251802 | 100506393 | <i>LOC100506393</i> | 0.2384 | -1.6492 |
| adult | 12p12         | 20522178 | 20837041 | 5139      | <i>PDE3A</i>        | 0.2384 | -1.6492 |
| adult | 12p12.2       | 20848288 | 20906320 | 53919     | <i>SLCO1C1</i>      | 0.2384 | -1.6492 |
| adult | 12p12         | 20963637 | 21069843 | 28234     | <i>SLCO1B3</i>      | 0.2384 | -1.6492 |
| adult | 12p12.2       | 21168629 | 21243040 | 338821    | <i>SLCO1B7</i>      | 0.2384 | -1.6492 |
| adult | 12p           | 21284127 | 21392730 | 10599     | <i>SLCO1B1</i>      | 0.2384 | -1.6492 |
| adult | 12p12         | 21417533 | 21487832 | 6579      | <i>SLCO1A2</i>      | 0.2384 | -1.6492 |
| adult | 12p12.1       | 21525801 | 21532914 | 3375      | <i>IAPP</i>         | 0.2384 | -1.6492 |
| adult | 12p12.1       | 21590537 | 21624182 | 79912     | <i>PYROXD1</i>      | 0.2384 | -1.6492 |
| adult | 12p12         | 21621843 | 21654603 | 5965      | <i>RECQL</i>        | 0.2384 | -1.6492 |
| adult | 12p12.1       | 21654698 | 21671337 | 51026     | <i>GOLT1B</i>       | 0.2384 | -1.6492 |
| adult | 12p12.2       | 21689122 | 21757781 | 2998      | <i>GYS2</i>         | 0.2384 | -1.6492 |
| adult | 12p12.2-p12.1 | 21788275 | 21810728 | 3945      | <i>LDHB</i>         | 0.2384 | -1.6492 |
| adult | 12p11.23      | 21917888 | 21927755 | 3764      | <i>KCNJ8</i>        | 0.4637 | -1.5628 |

|       |               |          |          |           |                  |        |         |
|-------|---------------|----------|----------|-----------|------------------|--------|---------|
| adult | 12p12.1       | 21950323 | 22089628 | 10060     | <i>ABCC9</i>     | 0.4637 | -1.5628 |
| adult | 12p12.1       | 22199109 | 22218606 | 55907     | <i>CMAS</i>      | 0.4637 | -1.5628 |
| adult | 12p12.1-p11.2 | 22346324 | 22487648 | 6489      | <i>ST8SIA1</i>   | 0.4637 | -1.5628 |
| adult | 12p12.1       | 22601479 | 22697480 | 9847      | <i>C2CD5</i>     | 0.4396 | -1.5767 |
| adult | 12p12.1       | 22778075 | 22797349 | 55500     | <i>ETNK1</i>     | 0.4396 | -1.5767 |
| adult | 12p12.1       | 23685230 | 23737546 | 6660      | <i>SOX5</i>      | 0.4396 | -1.5767 |
| adult | 12p12.1       | 24365354 | 24365429 | 100126320 | <i>MIR920</i>    | 0.4396 | -1.5767 |
| adult | 12p12.1       | 24719897 | 24737102 | 144360    | <i>LINC00477</i> | 0.4396 | -1.5767 |
| adult | 12p12.1       | 24962957 | 25055322 | 586       | <i>BCAT1</i>     | 0.4396 | -1.5767 |
| adult | 12p12.1       | 25146364 | 25150373 | 196415    | <i>C12orf77</i>  | 0.4396 | -1.5767 |
| adult | 12p12.1       | 25205180 | 25261269 | 4033      | <i>LRMP</i>      | 0.4396 | -1.5767 |
| adult | 12p12.1       | 25261222 | 25348094 | 55259     | <i>CASC1</i>     | 0.4396 | -1.5767 |
| adult | 12p12.1       | 25348149 | 25357949 | 144363    | <i>LYRM5</i>     | 0.4396 | -1.5767 |
| adult | 12p12.1       | 25357722 | 25403865 | 3845      | <i>KRAS</i>      | 0.4396 | -1.5767 |
| adult | 12p12.3       | 26111963 | 26225807 | 11228     | <i>RASSF8</i>    | 0.4396 | -1.5018 |
| adult | 12p12.1       | 26272958 | 26278003 | 79365     | <i>BHLHE41</i>   | 0.4396 | -1.5018 |
| adult | 12p11.2       | 26348268 | 26387708 | 8082      | <i>SSPN</i>      | 0.4396 | -1.5018 |
| adult | 12p11         | 26488269 | 26986131 | 3709      | <i>ITPR2</i>     | 0.4396 | -1.5018 |
| adult | 12p11.23      | 27058111 | 27091254 | 55726     | <i>ASUN</i>      | 0.4396 | -1.5018 |
| adult | 12p11.23      | 27091304 | 27113679 | 26127     | <i>FGFR10P2</i>  | 0.4396 | -1.5018 |
| adult | 12q11-q12     | 27124505 | 27167339 | 51768     | <i>TM7SF3</i>    | 0.4396 | -1.5018 |
| adult | 12p11.23      | 27175454 | 27183606 | 9412      | <i>MED21</i>     | 0.4396 | -1.5018 |
| adult | 12p11.23      | 27233989 | 27235455 | 728858    | <i>C12orf71</i>  | 0.4396 | -1.5018 |
| adult | 12p11.23      | 27397077 | 27478890 | 23012     | <i>STK38L</i>    | 0.4396 | -1.5018 |
| adult | 12p12.2-p11.2 | 27485786 | 27578746 | 56938     | <i>ARNTL2</i>    | 0.4396 | -1.5018 |
| adult | 12p11.23      | 27619742 | 27655118 | 341346    | <i>SMCO2</i>     | 0.4396 | -1.5018 |
| adult | 12p12.1       | 27677044 | 27848497 | 8496      | <i>PPFIBP1</i>   | 0.4396 | -1.5018 |
| adult | 12p11.22      | 27849427 | 27850566 | 387849    | <i>REP15</i>     | 0.4396 | -1.5018 |
| adult | 12p11         | 27863705 | 27909237 | 60488     | <i>MRPS35</i>    | 0.4396 | -1.5018 |
| adult | 12p11.22      | 27915598 | 27924209 | 100287284 | <i>MANSC4</i>    | 0.4396 | -1.5018 |
| adult | 12p11.22      | 27933186 | 27955973 | 57542     | <i>KLHL42</i>    | 0.2253 | -1.5018 |
| adult | 12p12.1-p11.2 | 28111016 | 28122894 | 5744      | <i>PTHLH</i>     | 0.2253 | -1.5018 |
| adult | 12p11.22      | 28410132 | 28703099 | 55297     | <i>CCDC91</i>    | 0.2253 | -1.5031 |

|       |               |          |          |           |                  |         |         |
|-------|---------------|----------|----------|-----------|------------------|---------|---------|
| adult | 12p11.22      | 29301935 | 29488549 | 55711     | <i>FAR2</i>      | 0.2253  | -1.5043 |
| adult | 12p11.22      | 29493578 | 29534143 | 51290     | <i>ERGIC2</i>    | 0.2253  | -1.5043 |
| adult | 12p           | 29542226 | 29617863 | 101055625 | <i>OVCH1-AS1</i> | 0.27885 | -1.4948 |
| adult | 12p11.22      | 29580488 | 29650619 | 341350    | <i>OVCH1</i>     | 0.3324  | -1.4853 |
| adult | 12p11.22      | 29653745 | 29936743 | 83857     | <i>TMTC1</i>     | 0.30385 | -1.4668 |
| adult | 12p11.21      | 30781914 | 30830178 | 10526     | <i>IPO8</i>      | 0.2753  | -1.4135 |
| adult | 12p11         | 30862485 | 30907448 | 65981     | <i>CAPRIN2</i>   | 0.2753  | -1.4135 |
| adult | 12p11.21      | 30948614 | 30955645 | 100287314 | <i>LINC00941</i> | 0.2753  | -1.4135 |
| adult | 12p11.21      | 31079837 | 31149537 | 441631    | <i>TSPAN11</i>   | 0.2753  | -1.4135 |
| adult | 12p11         | 31226778 | 31257725 | 1663      | <i>DDX11</i>     | 0.2753  | -1.4135 |
| adult | 12p11         | 31433519 | 31479121 | 58516     | <i>FAM60A</i>    | 0.2753  | -1.4135 |
| adult | 12p11.21      | 31477249 | 31478879 | 79857     | <i>FLJ13224</i>  | 0.2753  | -1.4135 |
| adult | 12p11.21      | 31535156 | 31743952 | 160518    | <i>DENND5B</i>   | 0.2753  | -1.4135 |
| adult | 12p11.21      | 31800093 | 31822016 | 254013    | <i>METTL20</i>   | 0.2753  | -1.4135 |
| adult | 12p11.21      | 31824070 | 31882108 | 196394    | <i>AMN1</i>      | 0.2753  | -1.4135 |
| adult | 12p11.21      | 31944118 | 31945175 | 440093    | <i>H3F3C</i>     | 0.2753  | -1.4135 |
| adult | 12p11.21      | 32112352 | 32146043 | 55196     | <i>KIAA1551</i>  | 0.2449  | -1.792  |
| adult | 12p11.2-p11.1 | 32260184 | 32531141 | 636       | <i>BICD1</i>     | 0.2449  | -1.5319 |
| adult | 12p11.21      | 32654976 | 32798984 | 121512    | <i>FGD4</i>      | 0.2449  | -1.5319 |
| adult | 12p13         | 8608590  | 8630926  | 93978     | <i>CLEC6A</i>    | 0.2932  | -1.4639 |
| adult | 12p13.31      | 8666135  | 8674960  | 338339    | <i>CLEC4D</i>    | 0.2932  | -1.4639 |
| adult | 12p13.31      | 8685900  | 8693558  | 26253     | <i>CLEC4E</i>    | 0.2932  | -1.4639 |
| adult | 12p13         | 8754761  | 8765442  | 57379     | <i>AICDA</i>     | 0.2932  | -1.4639 |
| adult | 12p13.1-p12.3 | 8798538  | 8815484  | 8076      | <i>MFAP5</i>     | 0.2932  | -1.4639 |
| adult | 12p13.31      | 8852380  | 8929787  | 57494     | <i>RIMKLB</i>    | 0.2932  | -1.4639 |
| adult | 12p13.31      | 8975067  | 9029377  | 144568    | <i>A2ML1</i>     | 0.2932  | -1.4639 |
| adult | 12p13         | 9067315  | 9094060  | 1911      | <i>PHC1</i>      | 0.2932  | -1.4639 |
| adult | 12p13         | 9092956  | 9102357  | 4074      | <i>M6PR</i>      | 0.2932  | -1.4639 |
| adult | 12p13.31      | 9142220  | 9163340  | 10219     | <i>KLRG1</i>     | 0.2932  | -1.4639 |
| adult | 12p13.31      | 9208184  | 9217666  | 253128    | <i>LINC00612</i> | 0.2932  | -1.4639 |
| adult | 12p13.31      | 9217772  | 9220651  | 144571    | <i>A2M-AS1</i>   | 0.2932  | -1.4639 |
| adult | 12p13.31      | 9220303  | 9268558  | 2         | <i>A2M</i>       | 0.2932  | -1.4639 |
| adult | 12q22         | 92534053 | 92539673 | 694       | <i>BTG1</i>      | 0.5185  | -1.7676 |

|       |                                   |          |          |           |                   |         |         |
|-------|-----------------------------------|----------|----------|-----------|-------------------|---------|---------|
| adult | 12p13-p12.2                       | 9301435  | 9360966  | 5858      | <i>PZP</i>        | 0.2932  | -1.4639 |
| adult | 12p13.31                          | 9381128  | 9386803  | 3         | <i>A2MP1</i>      | 0.2932  | -1.4639 |
| adult | 12p13.31                          | 9436252  | 9466684  | 642846    | <i>LOC642846</i>  | 0.2932  | -1.4639 |
| adult | 12p13.31                          | 9570286  | 9600768  | 440081    | <i>DDX12P</i>     | 0.2932  | -1.4639 |
| adult | 12p13                             | 9747869  | 9760497  | 3820      | <i>KLRB1</i>      | 0.2932  | -1.5326 |
| adult | 12p13.31                          | 9769879  | 9811010  | 374443    | <i>LOC374443</i>  | 0.2932  | -1.5326 |
| adult | 12p13                             | 9822303  | 9852151  | 29121     | <i>CLEC2D</i>     | 0.2932  | -1.5326 |
| adult | 12p13.31                          | 9868455  | 9885895  | 160365    | <i>CLECL1</i>     | 0.2932  | -1.5326 |
| adult | 12p13                             | 9905081  | 9913497  | 969       | <i>CD69</i>       | 0.2932  | -1.5326 |
| adult | 12p13.31                          | 9980076  | 9997603  | 51348     | <i>KLRF1</i>      | 0.2932  | -1.5326 |
| adult | 13q21.31                          | 64311567 | 64316701 | 283491    | <i>OR7E156P</i>   | 0.657   | -1.3758 |
| adult | 13q21.32                          | 66876965 | 67804468 | 5101      | <i>PCDH9</i>      | 0.657   | -1.3758 |
| adult | 13q21.33                          | 69435416 | 69459457 | 338862    | <i>LINC00550</i>  | 0.657   | -1.3758 |
| adult | 13q31.1                           | 79173229 | 79177695 | 5457      | <i>POU4F1</i>     | 1.27025 | -1.0716 |
| adult | 13q31.1                           | 79188420 | 79233314 | 79596     | <i>RNF219</i>     | 1.7848  | -1.319  |
| adult | 13q31.1                           | 79893002 | 79980356 | 64062     | <i>RBM26</i>      | 1.7848  | -1.319  |
| adult | 13q31.1                           | 80055258 | 80130212 | 54602     | <i>NDFIP2</i>     | 1.7848  | -1.319  |
| adult | 13q31.1                           | 80910111 | 80915086 | 10253     | <i>SPRY2</i>      | 1.7848  | -1.319  |
| adult | 13q31.1                           | 84451339 | 84456528 | 114798    | <i>SLITRK1</i>    | 1.8122  | -1.363  |
| adult | 13q31.1                           | 86366921 | 86373483 | 84189     | <i>SLITRK6</i>    | 1.8122  | -1.363  |
| adult | 13q31.2                           | 88096241 | 88323218 | 642345    | <i>MIR4500HG</i>  | 1.8122  | -1.363  |
| adult | 13q31.2                           | 88270919 | 88270995 | 100616182 | <i>MIR4500</i>    | 1.8122  | -1.363  |
| adult | 13q31.2                           | 88324869 | 88331870 | 26050     | <i>SLITRK5</i>    | 1.8122  | -1.363  |
| adult | 13q31.3                           | 90883435 | 90883531 | 693207    | <i>MIR622</i>     | 1.8112  | -0.7462 |
| adult | 13q31.3                           | 91543207 | 91578851 | 144776    | <i>LINC00410</i>  | 1.8112  | -0.7462 |
| adult | 18q22.1                           | 65173818 | 65183967 | 92126     | <i>DSEL</i>       | 1.1089  | -0.5644 |
| adult | 18q22.1                           | 65183782 | 65566856 | 643542    | <i>LOC643542</i>  | 1.12305 | -0.3551 |
| adult | 18q22                             | 66340924 | 66382353 | 54495     | <i>TMX3</i>       | 1.1372  | 0       |
| adult | 18q22.1                           | 66382490 | 66722426 | 79839     | <i>CCDC102B</i>   | 1.1372  | 0       |
| adult | 21p11                             | 10906186 | 10990943 | 7179      | <i>TPTE</i>       | 1.5813  | -0.2818 |
| adult | 21p11.2                           | 11020841 | 11098925 | 85318     | <i>BAGE3</i>      | 1.5813  | -0.2818 |
| adult | 21p11.1 not on reference assembly | 11057795 | 11098937 | 574       | <i>BAGE</i>       | 1.5813  | -0.2818 |
| adult | 21q11.2                           | 14410486 | 14490571 | 149992    | <i>ANKRD30BP2</i> | 1.06    | -0.2818 |

|       |               |          |          |        |                     |        |         |
|-------|---------------|----------|----------|--------|---------------------|--------|---------|
| adult | 21q11.2       | 14982497 | 15013906 | 317754 | <i>POTED</i>        | 1.06   | -0.2818 |
| adult | 21q11.2       | 15316095 | 15352765 | 391267 | <i>ANKRD20A11P</i>  | 1.06   | -0.2818 |
| adult | 21q11.2       | 15481134 | 15579270 | 149998 | <i>LIP1</i>         | 1.06   | -0.2818 |
| adult | 21q11         | 15588465 | 15600693 | 54033  | <i>RBM11</i>        | 1.06   | -0.2818 |
| adult | 21q11.2       | 15646119 | 15663706 | 150000 | <i>ABCC13</i>       | 1.06   | -0.2818 |
| adult | 21q11         | 15743436 | 15755509 | 6782   | <i>HSPA13</i>       | 1.06   | -0.2818 |
| adult | 21q11         | 15857548 | 15918681 | 64092  | <i>SAMSN1</i>       | 1.06   | -0.2818 |
| adult | 21q11.2       | 15963712 | 16015428 | 388813 | <i>LOC388813</i>    | 1.06   | -0.2818 |
| adult | 21q11.2       | 16333555 | 16437126 | 8204   | <i>NRIP1</i>        | 1.06   | -0.2818 |
| adult | 21q11.2       | 17102343 | 17252390 | 29761  | <i>USP25</i>        | 1.6741 | -0.2818 |
| adult | 21q21.1       | 17911408 | 17911489 | 407055 | <i>MIR99A</i>       | 1.6741 | -0.2818 |
| adult | 21q21.1       | 17912147 | 17912231 | 406885 | <i>MIRLET7C</i>     | 1.6741 | -0.2818 |
| adult | 21q21.1       | 17962556 | 17962645 | 406912 | <i>MIR125B2</i>     | 1.6741 | -0.2818 |
| adult | 21q21.1       | 18885223 | 18942429 | 1525   | <i>CXADR</i>        | 1.6741 | -0.2818 |
| adult | 21q21.1       | 18965967 | 18985268 | 10950  | <i>BTG3</i>         | 1.6741 | -0.2818 |
| adult | 21q21.1       | 19149720 | 19164826 | 246312 | <i>C21orf91-OT1</i> | 1.6741 | -0.2818 |
| adult | 21q21.1       | 19161283 | 19191703 | 54149  | <i>C21orf91</i>     | 1.6741 | -0.2818 |
| adult | 21q21.1       | 19207988 | 19257925 | 54075  | <i>CHODL-AS1</i>    | 1.6741 | -0.2818 |
| adult | 21q11.2       | 19289656 | 19639687 | 140578 | <i>CHODL</i>        | 1.742  | -0.2818 |
| adult | 21q21.1       | 19641432 | 19775970 | 5651   | <i>TMPRSS15</i>     | 1.8099 | -0.2818 |
| adult | 21q21.1       | 22114907 | 22175426 | 387486 | <i>LINC00320</i>    | 1.8154 | -0.2818 |
| adult | 21q21.1       | 22370632 | 22912517 | 4685   | <i>NCAM2</i>        | 1.8154 | -0.2818 |
| adult | 21q21.1       | 23095612 | 23109639 | 378828 | <i>LINC00317</i>    | 1.7208 | -0.2818 |
| adult | 21q21.1       | 23470935 | 23488847 | 54143  | <i>LINC00308</i>    | 1.7208 | -0.2818 |
| adult | 21q21.1-q21.2 | 26212863 | 26430056 | 339622 | <i>LOC339622</i>    | 1.6036 | 0       |
| adult | 21q21.3       | 26758132 | 26804013 | 54072  | <i>LINC00158</i>    | 1.6036 | 0       |
| adult | 21q21.3       | 26946291 | 26946356 | 406947 | <i>MIR155</i>       | 1.6036 | 0       |
| adult | 21q21.3       | 26955086 | 26955536 | 282566 | <i>LINC00515</i>    | 1.6036 | 0       |
| adult | 21q21.3       | 26957967 | 26979801 | 54148  | <i>MRPL39</i>       | 1.6036 | 0       |
| adult | 21q21.2       | 27011593 | 27086885 | 58494  | <i>JAM2</i>         | 1.6036 | 0       |
| adult | 21q21.1       | 27096790 | 27107965 | 522    | <i>ATP5J</i>        | 1.6036 | 0       |
| adult | 21q21.3       | 27107257 | 27144771 | 2551   | <i>GABPA</i>        | 1.6036 | 0       |
| adult | 21q21.3       | 27252860 | 27512708 | 351    | <i>APP</i>          | 1.6036 | 0       |

|       |          |          |          |           |                  |        |   |
|-------|----------|----------|----------|-----------|------------------|--------|---|
| adult | 21q21.2  | 27838527 | 27945581 | 116159    | <i>CYYR1</i>     | 1.6036 | 0 |
| adult | 21q21.2  | 28208605 | 28217728 | 9510      | <i>ADAMTS1</i>   | 1.6036 | 0 |
| adult | 21q21.3  | 28290230 | 28339439 | 11096     | <i>ADAMTS5</i>   | 1.6036 | 0 |
| adult | 21q21.3  | 29094697 | 29123552 | 54088     | <i>LINC00113</i> | 1.6036 | 0 |
| adult | 21q21.3  | 29385681 | 29395528 | 246705    | <i>LINC00314</i> | 1.6036 | 0 |
| adult | 21q21.3  | 29911639 | 29912677 | 118421    | <i>LINC00161</i> | 1.6036 | 0 |
| adult | 21q21.3  | 30248385 | 30257695 | 29104     | <i>N6AMT1</i>    | 1.6036 | 0 |
| adult | 21q22.11 | 30300465 | 30365277 | 26046     | <i>LTN1</i>      | 1.6036 | 0 |
| adult | 21q22.11 | 30378079 | 30391685 | 10069     | <i>RWDD2B</i>    | 1.6036 | 0 |
| adult | 21q22.11 | 30396937 | 30426807 | 10600     | <i>USP16</i>     | 1.6036 | 0 |
| adult | 21q22.11 | 30428642 | 30446118 | 10694     | <i>CCT8</i>      | 1.6036 | 0 |
| adult | 21q22.3  | 30449791 | 30548210 | 56911     | <i>MAP3K7CL</i>  | 1.6036 | 0 |
| adult | 21q22.11 | 30565814 | 30660526 | 193629    | <i>LINC00189</i> | 1.6036 | 0 |
| adult | 21q22.11 | 30671115 | 30718469 | 571       | <i>BACH1</i>     | 1.6036 | 0 |
| adult | 21q22.11 | 30909253 | 31312282 | 2897      | <i>GRIK1</i>     | 1.6036 | 0 |
| adult | 21q22.11 | 30968359 | 31003067 | 100379661 | <i>GRIK1-AS2</i> | 1.6036 | 0 |
| adult | 21q22.11 | 31120493 | 31136325 | 642976    | <i>GRIK1-AS1</i> | 1.6036 | 0 |
| adult | 21q22.11 | 31538240 | 31538971 | 26285     | <i>CLDN17</i>    | 1.6036 | 0 |
| adult | 21q22.11 | 31581468 | 31584101 | 266919    | <i>LINC00307</i> | 1.6036 | 0 |
| adult | 21q22.11 | 31586323 | 31588469 | 9073      | <i>CLDN8</i>     | 1.6036 | 0 |
| adult | 21q22.11 | 31653626 | 31655276 | 643803    | <i>KRTAP24-1</i> | 1.6036 | 0 |
| adult | 21q22.11 | 31661462 | 31661832 | 100131902 | <i>KRTAP25-1</i> | 1.6036 | 0 |
| adult | 21q22.11 | 31691449 | 31692607 | 388818    | <i>KRTAP26-1</i> | 1.6036 | 0 |
| adult | 21q22.11 | 31709330 | 31710012 | 643812    | <i>KRTAP27-1</i> | 1.6036 | 0 |
| adult | 21q22.1  | 31720716 | 31720924 | 337963    | <i>KRTAP23-1</i> | 1.6036 | 0 |
| adult | 21q22.1  | 31743708 | 31744557 | 337959    | <i>KRTAP13-2</i> | 1.6036 | 0 |
| adult | 21q22.1  | 31768391 | 31769138 | 140258    | <i>KRTAP13-1</i> | 1.6036 | 0 |
| adult | 21q22.1  | 31797710 | 31798230 | 337960    | <i>KRTAP13-3</i> | 1.6036 | 0 |
| adult | 21q22.1  | 31802593 | 31803076 | 284827    | <i>KRTAP13-4</i> | 1.6036 | 0 |
| adult | 21q22.1  | 31812645 | 31813098 | 254950    | <i>KRTAP15-1</i> | 1.6036 | 0 |
| adult | 21q22.1  | 31852363 | 31852636 | 337882    | <i>KRTAP19-1</i> | 1.6036 | 0 |
| adult | 21q22.1  | 31859508 | 31859667 | 337969    | <i>KRTAP19-2</i> | 1.6036 | 0 |
| adult | 21q22.1  | 31863781 | 31864275 | 337970    | <i>KRTAP19-3</i> | 1.6036 | 0 |

|       |          |          |          |           |                  |        |   |
|-------|----------|----------|----------|-----------|------------------|--------|---|
| adult | 21q22.1  | 31869173 | 31869428 | 337971    | <i>KRTAP19-4</i> | 1.6036 | 0 |
| adult | 21q22.1  | 31874189 | 31874408 | 337972    | <i>KRTAP19-5</i> | 1.6036 | 0 |
| adult | 21q22.1  | 31913853 | 31914183 | 337973    | <i>KRTAP19-6</i> | 1.6036 | 0 |
| adult | 21q22.1  | 31933416 | 31933608 | 337974    | <i>KRTAP19-7</i> | 1.6036 | 0 |
| adult | 21q22.11 | 31962423 | 31962716 | 100288287 | <i>KRTAP22-2</i> | 1.6036 | 0 |
| adult | 21q22.1  | 31964758 | 31965374 | 337968    | <i>KRTAP6-3</i>  | 1.6036 | 0 |
| adult | 21q22.1  | 31971004 | 31971193 | 337967    | <i>KRTAP6-2</i>  | 1.6036 | 0 |
| adult | 21q22.1  | 31973439 | 31973586 | 337979    | <i>KRTAP22-1</i> | 1.6036 | 0 |
| adult | 21q22.1  | 31986004 | 31986223 | 337966    | <i>KRTAP6-1</i>  | 1.6036 | 0 |
| adult | 21q22.1  | 31988773 | 31988944 | 337975    | <i>KRTAP20-1</i> | 1.6036 | 0 |
| adult | 21q22.11 | 31992945 | 31993169 | 100151643 | <i>KRTAP20-4</i> | 1.6036 | 0 |
| adult | 21q22.1  | 32007582 | 32007780 | 337976    | <i>KRTAP20-2</i> | 1.6036 | 0 |
| adult | 21q22.11 | 32015182 | 32015455 | 337985    | <i>KRTAP20-3</i> | 1.6036 | 0 |
| adult | 21q22.11 | 32090842 | 32091095 | 100288323 | <i>KRTAP21-3</i> | 1.6036 | 0 |
| adult | 21q22.1  | 32119268 | 32119520 | 337978    | <i>KRTAP21-2</i> | 1.6036 | 0 |
| adult | 21q22.1  | 32127456 | 32127696 | 337977    | <i>KRTAP21-1</i> | 1.6036 | 0 |
| adult | 21q22.1  | 32185014 | 32185570 | 337879    | <i>KRTAP8-1</i>  | 1.6036 | 0 |
| adult | 21q22.11 | 32201357 | 32202051 | 337878    | <i>KRTAP7-1</i>  | 1.6036 | 0 |
| adult | 21q22.1  | 32252963 | 32253874 | 337880    | <i>KRTAP11-1</i> | 1.6036 | 0 |
| adult | 21q22.11 | 32410477 | 32410795 | 728299    | <i>KRTAP19-8</i> | 1.6036 | 0 |
| adult | 21q22.11 | 32490735 | 32931290 | 7074      | <i>TIAMI</i>     | 1.6036 | 0 |
| adult | 21q22.11 | 33031934 | 33041243 | 6647      | <i>SOD1</i>      | 1.6036 | 0 |
| adult | 21q22.1  | 33043312 | 33104431 | 57466     | <i>SCAF4</i>     | 1.6036 | 0 |
| adult | 21q22.1  | 33245627 | 33376377 | 30811     | <i>HUNK</i>      | 1.6036 | 0 |
| adult | 21q22.11 | 33452793 | 33458608 | 100551499 | <i>LINC00159</i> | 1.6036 | 0 |
| adult | 21q22.11 | 33640529 | 33651376 | 54069     | <i>MIS18A</i>    | 1.6036 | 0 |
| adult | 21q22.1  | 33664123 | 33684599 | 56246     | <i>MRAP</i>      | 1.6036 | 0 |
| adult | 21q22.11 | 33683329 | 33765312 | 9875      | <i>URBI</i>      | 1.6036 | 0 |
| adult | 21q22.11 | 33784744 | 33887710 | 59271     | <i>EVAIC</i>     | 1.6036 | 0 |
| adult | 21q22.1  | 33973983 | 33984913 | 56683     | <i>C21orf59</i>  | 1.6036 | 0 |
| adult | 21q22.2  | 34001068 | 34100250 | 8867      | <i>SYNJI</i>     | 1.6036 | 0 |
| adult | 21q21.3  | 34106209 | 34144169 | 94104     | <i>PAXBP1</i>    | 1.6036 | 0 |
| adult | 21q22.11 | 34162983 | 34186053 | 56245     | <i>C21orf62</i>  | 1.6036 | 0 |

|       |               |          |          |           |                     |         |   |
|-------|---------------|----------|----------|-----------|---------------------|---------|---|
| adult | 21q22.11      | 34398215 | 34401503 | 10215     | <i>OLIG2</i>        | 1.4879  | 0 |
| adult | 21q22.11      | 34442449 | 34444728 | 116448    | <i>OLIG1</i>        | 1.4879  | 0 |
| adult | 21q22.11      | 34602199 | 34635062 | 3455      | <i>IFNAR2</i>       | 1.4879  | 0 |
| adult | 21q22.11      | 34637936 | 34638565 | 100288432 | <i>IL10RB-AS1</i>   | 1.4879  | 0 |
| adult | 21q22.11      | 34638664 | 34669539 | 3588      | <i>IL10RB</i>       | 1.4879  | 0 |
| adult | 21q22.11      | 34697213 | 34732128 | 3454      | <i>IFNAR1</i>       | 1.4879  | 0 |
| adult | 21q22.11      | 34775201 | 34809828 | 3460      | <i>IFNGR2</i>       | 1.4879  | 0 |
| adult | 21q22.11      | 34821447 | 34852316 | 757       | <i>TMEM50B</i>      | 1.4879  | 0 |
| adult | 21q22.11      | 34860361 | 34863790 | 54943     | <i>DNAJC28</i>      | 1.4879  | 0 |
| adult | 21q22.11      | 34876237 | 34914464 | 2618      | <i>GART</i>         | 1.4879  | 0 |
| adult | 21q22.11      | 34915343 | 34932973 | 6651      | <i>SON</i>          | 1.4879  | 0 |
| adult | 21q22.1       | 34949858 | 34961014 | 29980     | <i>DONSON</i>       | 1.4879  | 0 |
| adult | 21q21.3       | 34961647 | 35014160 | 9946      | <i>CRYZL1</i>       | 1.4879  | 0 |
| adult | 21q22.1-q22.2 | 35014783 | 35210802 | 6453      | <i>ITSN1</i>        | 1.4879  | 0 |
| adult | 21q22.11      | 35275756 | 35288158 | 539       | <i>ATP5O</i>        | 1.4879  | 0 |
| adult | 21q22.3       | 36160097 | 36421595 | 861       | <i>RUNX1</i>        | 1.09225 | 0 |
| adult | 21q22.12      | 36410232 | 36411723 | 80215     | <i>RUNX1-IT1</i>    | 1.1042  | 0 |
| adult | 21q22.12      | 37093012 | 37093106 | 768219    | <i>MIR802</i>       | 1.1042  | 0 |
| adult | 21q22.13      | 37406838 | 37433116 | 54093     | <i>SETD4</i>        | 1.1042  | 0 |
| adult | 21q22.12      | 37441939 | 37498938 | 100133286 | <i>LOC100133286</i> | 1.1042  | 0 |
| adult | 21q22.13      | 37442221 | 37445475 | 873       | <i>CBR1</i>         | 1.1042  | 0 |
| adult | 21q22.2       | 37507262 | 37518860 | 874       | <i>CBR3</i>         | 1.1042  | 0 |
| adult | 21q22.2       | 37536838 | 37666572 | 9980      | <i>DOPEY2</i>       | 1.1042  | 0 |
| adult | 21q22.13      | 37692486 | 37748944 | 23515     | <i>MORC3</i>        | 1.1042  | 0 |
| adult | 21q22.13      | 37757688 | 37789125 | 8208      | <i>CHAF1B</i>       | 1.1042  | 0 |
| adult | 21q22.3       | 37832919 | 37838739 | 23562     | <i>CLDN14</i>       | 1.1042  | 0 |
| adult | 21q22.13      | 38071432 | 38118219 | 6493      | <i>SIM2</i>         | 1.1042  | 0 |
| adult | 21q22.13      | 38123188 | 38338956 | 3141      | <i>HLCS</i>         | 1.1042  | 0 |
| adult | 21q22.2       | 38378862 | 38391958 | 53820     | <i>RIPPLY3</i>      | 1.1042  | 0 |
| adult | 21q22.2       | 38437663 | 38445103 | 51227     | <i>PIGP</i>         | 1.1042  | 0 |
| adult | 21q22.2       | 38445570 | 38575408 | 7267      | <i>TTC3</i>         | 1.1042  | 0 |
| adult | 21q22.13      | 38580803 | 38594037 | 257203    | <i>DSCR9</i>        | 1.1042  | 0 |
| adult | 21q22.2       | 38595725 | 38639833 | 10311     | <i>DSCR3</i>        | 1.1042  | 0 |



|       |          |           |           |           |                   |         |         |
|-------|----------|-----------|-----------|-----------|-------------------|---------|---------|
| adult | 21q22.13 | 38739858  | 38887679  | 1859      | <i>DYRK1A</i>     | 1.1042  | 0       |
| adult | 21q22.1  | 38996524  | 39288741  | 3763      | <i>KCNJ6</i>      | 1.1042  | 0       |
| adult | 21q22.2  | 39426312  | 39493454  | 10281     | <i>DSCR4</i>      | 1.1042  | 0       |
| adult | 21q22.2  | 39493544  | 39528605  | 84677     | <i>DSCR8</i>      | 1.1042  | 0       |
| adult | 21q22.13 | 39578249  | 39580738  | 259234    | <i>DSCR10</i>     | 1.1042  | 0       |
| adult | 21q22.2  | 39601836  | 39673746  | 3772      | <i>KCNJ15</i>     | 1.1042  | 0       |
| adult | 21q22.3  | 39739182  | 40033704  | 2078      | <i>ERG</i>        | 1.1042  | 0       |
| adult | 21q22.2  | 40110878  | 40124181  | 400866    | <i>LINC00114</i>  | 1.1042  | 0       |
| adult | 21q22.2  | 40177230  | 40196878  | 2114      | <i>ETS2</i>       | 1.1042  | 0       |
| adult | 21q22.3  | 40547371  | 40555440  | 8624      | <i>PSMG1</i>      | 1.1042  | 0       |
| adult | 21q22.2  | 40557403  | 40685712  | 54014     | <i>BRWD1</i>      | 1.1042  | 0       |
| adult | 21q22.2  | 40714240  | 40721047  | 3150      | <i>HMGNI</i>      | 1.1042  | 0       |
| adult | 21q22.3  | 40752212  | 40769815  | 7485      | <i>WRB</i>        | 1.1042  | 0       |
| adult | 21q22.2  | 40777769  | 40816128  | 150082    | <i>LCA5L</i>      | 1.1042  | 0       |
| adult | 21q22.3  | 40817796  | 40887433  | 6450      | <i>SH3BGR</i>     | 1.1042  | 0       |
| adult | 21q22.3  | 41029246  | 41034816  | 10317     | <i>B3GALT5</i>    | 1.1042  | 0       |
| adult | 21q22.2  | 41117333  | 41174023  | 150084    | <i>IGSF5</i>      | 1.1042  | 0       |
| adult | 21q22.2  | 41239346  | 41301322  | 5121      | <i>PCP4</i>       | 1.08065 | 0       |
| adult | 21p11.2  | 9907188   | 9968594   | 100132288 | <i>TEKT4P2</i>    | 1.5813  | -0.2818 |
| adult | 22q11.22 | 22599191  | 22599927  | 7441      | <i>VPREB1</i>     | 0.6387  | -1.5219 |
| adult | 4q32.1   | 160188997 | 160281301 | 9693      | <i>RAPGEF2</i>    | 1.1753  | -0.667  |
| adult | 4q22     | 89011415  | 89080011  | 9429      | <i>ABCG2</i>      | 1.1809  | -0.2421 |
| adult | 4q22.1   | 89178760  | 89205983  | 152926    | <i>PPMIK</i>      | 1.1809  | -0.2421 |
| adult | 4q22.1   | 89299890  | 89364249  | 55008     | <i>HERC6</i>      | 1.1809  | -0.2421 |
| adult | 4q22.1   | 89378267  | 89427319  | 51191     | <i>HERC5</i>      | 1.1809  | -0.2421 |
| adult | 4q       | 89442128  | 89444952  | 100996939 | <i>PYURF</i>      | 1.1809  | -0.2421 |
| adult | 4q22.1   | 89442128  | 89444952  | 84992     | <i>PIGY</i>       | 1.1809  | -0.2421 |
| adult | 4q21     | 89513573  | 89629693  | 8916      | <i>HERC3</i>      | 1.1809  | -0.2421 |
| adult | 4q22.1   | 89617063  | 89619386  | 266812    | <i>NAPIL5</i>     | 1.1809  | -0.2421 |
| adult | 4q22.1   | 89630939  | 89651254  | 285512    | <i>FAM13A-AS1</i> | 1.1809  | -0.2421 |
| adult | 4q22.1   | 89647104  | 89744512  | 10144     | <i>FAM13A</i>     | 1.1809  | -0.2421 |
| adult | 4q22.1   | 90033967  | 90036052  | 166815    | <i>TIGD2</i>      | 1.1809  | -0.2421 |
| adult | 4q22.1   | 90165428  | 90229161  | 285513    | <i>GPRIN3</i>     | 1.1809  | -0.2421 |

|       |              |           |           |           |                  |         |         |
|-------|--------------|-----------|-----------|-----------|------------------|---------|---------|
| adult | 4q21         | 90645249  | 90758127  | 6622      | <i>SNCA</i>      | 1.1809  | -0.2421 |
| adult | 4q22         | 90816051  | 90875780  | 22915     | <i>MMRN1</i>     | 1.1809  | -0.2421 |
| adult | 4q22.1       | 91048683  | 92523370  | 401145    | <i>CCSER1</i>    | 1.13705 | -0.2421 |
| adult | 6q16.2       | 100054649 | 100063454 | 59336     | <i>PRDM13</i>    | 0.2477  | -1.8758 |
| adult | 6q16         | 100367785 | 100442099 | 84539     | <i>MCHR2</i>     | 0.2477  | -1.8758 |
| adult | 6q16.3       | 100836749 | 100911551 | 6492      | <i>SIM1</i>      | 0.2477  | -1.8758 |
| adult | 6q16         | 100956070 | 101329248 | 10973     | <i>ASCC3</i>     | 0.2477  | -1.8758 |
| adult | 6q16.3       | 101846860 | 102517958 | 2898      | <i>GRIK2</i>     | 0.2477  | -1.9288 |
| adult | 6q16.3       | 105175967 | 105307794 | 57531     | <i>HACE1</i>     | 0.261   | -1.9189 |
| adult | 6q21         | 105384168 | 105388402 | 100113403 | <i>LINC00577</i> | 0.261   | -1.5242 |
| adult | 6q21         | 105404922 | 105531207 | 389421    | <i>LIN28B</i>    | 0.261   | -1.5242 |
| adult | 6q21         | 105544698 | 105584221 | 11149     | <i>BVES</i>      | 0.261   | -1.5242 |
| adult | 6q21         | 105585561 | 105617819 | 154442    | <i>BVES-AS1</i>  | 0.261   | -1.5242 |
| adult | 6q21         | 105605774 | 105624130 | 64208     | <i>POPDC3</i>    | 0.261   | -1.5242 |
| adult | 6q22         | 105725441 | 105850999 | 5550      | <i>PREP</i>      | 0.261   | -1.5242 |
| adult | 6q21         | 106534194 | 106557814 | 639       | <i>PRDM1</i>     | 0.261   | -1.5242 |
| adult | 6q21         | 106632351 | 106773695 | 9474      | <i>ATG5</i>      | 0.261   | -1.5242 |
| adult | 6q15         | 89966839  | 90025018  | 2570      | <i>GABRR2</i>    | 0.4183  | -1.5105 |
| adult | 6q15         | 90036343  | 90062619  | 51465     | <i>UBE2J1</i>    | 0.4183  | -1.5105 |
| adult | 6q15         | 90074334  | 90121995  | 58528     | <i>RRAGD</i>     | 0.4183  | -1.5105 |
| adult | 6q15         | 90142896  | 90343553  | 22881     | <i>ANKRD6</i>    | 0.4183  | -1.5105 |
| adult | 6q15         | 90341942  | 90348216  | 57226     | <i>LYRM2</i>     | 0.4183  | -1.5105 |
| adult | 6q15         | 90352493  | 90529513  | 23195     | <i>MDN1</i>      | 0.4183  | -1.5105 |
| adult | 6q15         | 90539618  | 90584155  | 9994      | <i>CASP8AP2</i>  | 0.4183  | -1.5105 |
| adult | 6q15         | 90604187  | 90605819  | 84694     | <i>GJA10</i>     | 0.4183  | -1.5105 |
| adult | 6q15         | 90636246  | 91006627  | 60468     | <i>BACH2</i>     | 0.4183  | -1.5105 |
| adult | 6q15         | 91223291  | 91297020  | 6885      | <i>MAP3K7</i>    | 0.6465  | -2.0851 |
| adult | 6q16.1       | 93949739  | 94129300  | 2045      | <i>EPHA7</i>     | 0.6465  | -2.0851 |
| adult | 6q16.1       | 94416800  | 94486199  | 643432    | <i>TSG1</i>      | 0.6465  | -2.0851 |
| adult | 6q16.1       | 96025372  | 96057328  | 79694     | <i>MANEA</i>     | 0.9176  | -2.4058 |
| adult | 6q16         | 96463844  | 96663488  | 10690     | <i>FUT9</i>      | 0.6272  | -1.9927 |
| adult | 6q16.1       | 96969701  | 97003151  | 23376     | <i>UFL1</i>      | 0.6272  | -1.9927 |
| adult | 6q16.1-q16.3 | 97010423  | 97064512  | 9457      | <i>FHL5</i>      | 0.6272  | -1.9927 |

|       |              |           |           |           |                   |        |         |
|-------|--------------|-----------|-----------|-----------|-------------------|--------|---------|
| adult | 6q16.1-q16.3 | 97241997  | 97285353  | 81491     | <i>GPR63</i>      | 0.6272 | -1.9927 |
| adult | 6q16.1       | 97337186  | 97345767  | 29078     | <i>NDUFAF4</i>    | 0.6272 | -1.9927 |
| adult | 6q16.1       | 97372495  | 97588630  | 114792    | <i>KLHL32</i>     | 0.6272 | -1.9927 |
| adult | 6q16.1       | 97590036  | 97731052  | 253714    | <i>MMS22L</i>     | 0.6272 | -1.9927 |
| adult | 6q16         | 99282579  | 99286666  | 5454      | <i>POU3F2</i>     | 0.6272 | -1.7924 |
| adult | 6q16.1-q16.3 | 99321600  | 99395882  | 26235     | <i>FBXL4</i>      | 0.6272 | -1.7924 |
| adult | 6q16.2       | 99720792  | 99797531  | 84553     | <i>FAXC</i>       | 0.6272 | -1.7924 |
| adult | 6q16.2       | 99817347  | 99842082  | 51805     | <i>COQ3</i>       | 0.6272 | -1.7924 |
| adult | 6q16.3       | 99847840  | 99873207  | 25957     | <i>PNISR</i>      | 0.6272 | -1.7924 |
| adult | 6q16.2       | 99880183  | 99963252  | 85015     | <i>USP45</i>      | 0.6272 | -1.7924 |
| adult | 6q16.2       | 99968869  | 99981059  | 100130890 | <i>TSTD3</i>      | 0.6272 | -1.7924 |
| adult | 6q21         | 99990262  | 100016690 | 892       | <i>CCNC</i>       | 0.6272 | -1.7924 |
| adult | 7q22.1       | 100026412 | 100031749 | 56257     | <i>MEPCE</i>      | 0.2794 | -2.5063 |
| adult | 7q22.1       | 100032911 | 100034094 | 221908    | <i>PPP1R35</i>    | 0.2794 | -2.5063 |
| adult | 7q22.1       | 100054237 | 100061894 | 402573    | <i>C7orf61</i>    | 0.2794 | -2.5063 |
| adult | 7p21-p15     | 100064141 | 100076902 | 81628     | <i>TSC22D4</i>    | 0.2794 | -2.5063 |
| adult | 7q22.1       | 100081549 | 100092424 | 222950    | <i>NYAPI</i>      | 0.2794 | -2.5063 |
| adult | 7q22.1       | 100136833 | 100165843 | 3268      | <i>AGFG2</i>      | 0.2794 | -2.5063 |
| adult | 7q22.1       | 100169852 | 100171270 | 100316904 | <i>SAP25</i>      | 0.2794 | -2.5063 |
| adult | 7q22         | 100171633 | 100183811 | 4034      | <i>LRCH4</i>      | 0.2794 | -2.5063 |
| adult | 7q22         | 100183955 | 100198740 | 26261     | <i>FBXO24</i>     | 0.2794 | -2.5063 |
| adult | 7q22.1       | 100187023 | 100201661 | 100129845 | <i>PCOLCE-AS1</i> | 0.2794 | -2.5063 |
| adult | 7q22         | 100199881 | 100205798 | 5118      | <i>PCOLCE</i>     | 0.2794 | -2.5063 |
| adult | 7q22         | 100209724 | 100213000 | 64598     | <i>MOSPD3</i>     | 0.2794 | -2.5063 |
| adult | 7q22         | 100218038 | 100231273 | 7036      | <i>TFR2</i>       | 0.2794 | -2.5063 |
| adult | 7q22         | 100240725 | 100254084 | 51412     | <i>ACTL6B</i>     | 0.2794 | -2.5063 |
| adult | 7q22         | 100271362 | 100276792 | 2783      | <i>GNB2</i>       | 0.2794 | -2.5063 |
| adult | 7q22         | 100277129 | 100286870 | 64599     | <i>GIGYF1</i>     | 0.2794 | -2.5063 |
| adult | 7q22         | 100303675 | 100305123 | 10248     | <i>POP7</i>       | 0.2794 | -2.5063 |
| adult | 7q22         | 100318422 | 100321323 | 2056      | <i>EPO</i>        | 0.2794 | -2.5063 |
| adult | 7q22         | 100331248 | 100395419 | 7455      | <i>ZAN</i>        | 0.2794 | -2.5063 |
| adult | 7q22         | 100400186 | 100425143 | 2050      | <i>EPHB4</i>      | 0.2794 | -2.5063 |
| adult | 7p22.3       | 1004485   | 1015235   | 90639     | <i>COX19</i>      | 0      | -1.8331 |

|       |         |           |           |           |                 |        |         |
|-------|---------|-----------|-----------|-----------|-----------------|--------|---------|
| adult | 7q22    | 100450340 | 100463160 | 56996     | <i>SLC12A9</i>  | 0.2794 | -2.5063 |
| adult | 7q22    | 100464949 | 100471076 | 7205      | <i>TRIP6</i>    | 0.2794 | -2.5063 |
| adult | 7q21    | 100472700 | 100486285 | 51593     | <i>SRRT</i>     | 0.2794 | -2.5063 |
| adult | 7q22.1  | 100486343 | 100487339 | 402682    | <i>UFSP1</i>    | 0.2794 | -2.5063 |
| adult | 7q22    | 100487614 | 100493541 | 43        | <i>ACHE</i>     | 0.2794 | -2.5063 |
| adult | 7q22    | 100612903 | 100662230 | 10071     | <i>MUC12</i>    | 0.2794 | -2.5063 |
| adult | 7q22.1  | 100663363 | 100702140 | 140453    | <i>MUC17</i>    | 0.2794 | -2.5063 |
| adult | 7q22.1  | 100728719 | 100735019 | 81844     | <i>TRIM56</i>   | 0.2794 | -2.5063 |
| adult | 7q22.1  | 100770369 | 100782547 | 5054      | <i>SERPINE1</i> | 0.2794 | -2.5063 |
| adult | 7q22.1  | 100797685 | 100804557 | 1174      | <i>AP1S1</i>    | 0.2794 | -2.5063 |
| adult | 7q22.1  | 100805789 | 100808852 | 7425      | <i>VGF</i>      | 0.2794 | -2.5063 |
| adult | 7q22.1  | 100813773 | 100823557 | 375607    | <i>NAT16</i>    | 0.2794 | -2.5063 |
| adult | 7q22.1  | 100839011 | 100844302 | 346606    | <i>MOGAT3</i>   | 0.2794 | -2.5063 |
| adult | 7q22    | 100849257 | 100861011 | 8985      | <i>PLOD3</i>    | 0.2794 | -2.5063 |
| adult | 7q22.1  | 100860984 | 100867471 | 10467     | <i>ZNHIT1</i>   | 0.2794 | -2.5063 |
| adult | 7q11.22 | 100875372 | 100881227 | 24146     | <i>CLDN15</i>   | 0.2794 | -2.5063 |
| adult | 7q22.1  | 100882892 | 100888371 | 51024     | <i>FISI</i>     | 0.2794 | -2.5063 |
| adult | 7q22.1  | 101006100 | 101202304 | 136227    | <i>COL26A1</i>  | 0.2794 | -2.5063 |
| adult | 7q22.1  | 101256604 | 101272576 | 93408     | <i>MYL10</i>    | 0.2794 | -2.5063 |
| adult | 7q22.1  | 101459183 | 101901513 | 1523      | <i>CUX1</i>     | 0.2794 | -2.5063 |
| adult | 7q22    | 101928352 | 101962178 | 10603     | <i>SH2B2</i>    | 0.2794 | -2.5063 |
| adult | 7q22.1  | 101986191 | 101996889 | 729597    | <i>SPDYE6</i>   | 0.2794 | -2.5063 |
| adult | 7q22.1  | 102073976 | 102097268 | 80228     | <i>ORAI2</i>    | 0.2794 | -2.5063 |
| adult | 7q22.1  | 102096666 | 102105321 | 54784     | <i>ALKBH4</i>   | 0.2794 | -2.5063 |
| adult | 7q22.1  | 102105329 | 102113615 | 222229    | <i>LRWD1</i>    | 0.2794 | -2.5063 |
| adult | 7q22.1  | 102113547 | 102119381 | 5439      | <i>POLR2J</i>   | 0.2794 | -2.5063 |
| adult | 7q22.1  | 102178365 | 102213068 | 548644    | <i>POLR2J3</i>  | 0.2794 | -2.5063 |
| adult | 7q22.1  | 102191678 | 102202757 | 100310812 | <i>SPDYE2B</i>  | 0.2794 | -2.5063 |
| adult | 7q22.1  | 102277194 | 102312176 | 246721    | <i>POLR2J2</i>  | 0.2794 | -2.5063 |
| adult | 7p22.3  | 1022834   | 1029276   | 54905     | <i>CYP2W1</i>   | 0      | -1.8331 |
| adult | 7q22.1  | 102389398 | 102449672 | 222234    | <i>FAM185A</i>  | 0.2794 | -2.5063 |
| adult | 7q22.1  | 102453307 | 102715015 | 222235    | <i>FBXL13</i>   | 0.2794 | -2.5063 |
| adult | 7q22.1  | 102553343 | 102585556 | 10234     | <i>LRRC17</i>   | 0.2794 | -2.5063 |

|       |              |           |           |           |                    |        |         |
|-------|--------------|-----------|-----------|-----------|--------------------|--------|---------|
| adult | 7q22.1       | 102715327 | 102740210 | 83787     | <i>ARMC10</i>      | 0.2794 | -2.5063 |
| adult | 7q22.1       | 102740022 | 102789569 | 222236    | <i>NAPEPLD</i>     | 0.2794 | -2.5063 |
| adult | 7q22.1       | 102781716 | 102782850 | 100129424 | <i>RPL19P12</i>    | 0.2794 | -2.5063 |
| adult | 7q22.1       | 102815461 | 102920759 | 349152    | <i>DPY19L2P2</i>   | 0.2794 | -2.5063 |
| adult | 7q22.1       | 102937872 | 102955133 | 9512      | <i>PMPCB</i>       | 0.2794 | -2.5063 |
| adult | 7q22         | 102952920 | 102985320 | 27000     | <i>DNAJC2</i>      | 0.2794 | -2.5063 |
| adult | 7q22.1-q22.3 | 102987970 | 103002914 | 5701      | <i>PSMC2</i>       | 0.2794 | -2.5063 |
| adult | 7q22.1       | 102993176 | 103086624 | 375611    | <i>SLC26A5</i>     | 0.2794 | -2.5063 |
| adult | 7q22         | 103112230 | 103629963 | 5649      | <i>RELN</i>        | 0.2794 | -2.5063 |
| adult | 7p22.3       | 1036622   | 1177893   | 84310     | <i>C7orf50</i>     | 0      | -1.8331 |
| adult | 7q22.1       | 103766787 | 103848495 | 5001      | <i>ORC5</i>        | 0.2794 | -2.5063 |
| adult | 7q22.2       | 103969103 | 104549003 | 375612    | <i>LHFPL3</i>      | 0.2794 | -2.5063 |
| adult | 7q22.1       | 104436953 | 104444539 | 645591    | <i>LHFPL3-ASI</i>  | 0.2794 | -2.5063 |
| adult | 7q22.1       | 104654636 | 104754532 | 55904     | <i>KMT2E</i>       | 0.2794 | -2.5063 |
| adult | 7q22-q31.1   | 104756820 | 104909524 | 6733      | <i>SRPK2</i>       | 0.2794 | -2.5063 |
| adult | 7q22.3       | 105096959 | 105162685 | 54517     | <i>PUS7</i>        | 0.2794 | -2.5063 |
| adult | 7q22.3       | 105172531 | 105208124 | 60561     | <i>RINT1</i>       | 0.2794 | -2.5063 |
| adult | 7q22.3       | 105205579 | 105221976 | 100130771 | <i>EFCAB10</i>     | 0.2794 | -2.5063 |
| adult | 7q22.3       | 105245220 | 105319609 | 222255    | <i>ATXN7L1</i>     | 0.2794 | -2.5063 |
| adult | 7q22.3       | 105603656 | 105676877 | 222256    | <i>CDHR3</i>       | 0.2794 | -2.5063 |
| adult | 7q22.3       | 105730813 | 105752791 | 6856      | <i>SYPL1</i>       | 0.2794 | -2.5063 |
| adult | 7q22.3       | 105888731 | 105925638 | 10135     | <i>NAMPT</i>       | 0.2794 | -2.5063 |
| adult | 7p22.3       | 1062568   | 1062662   | 442907    | <i>MIR339</i>      | 0      | -1.8331 |
| adult | 7q22.3       | 106297210 | 106301634 | 168455    | <i>CCDC71L</i>     | 0.2794 | -2.5063 |
| adult | 7q22.3       | 106505923 | 106549423 | 5294      | <i>PIK3CG</i>      | 0.2794 | -2.5063 |
| adult | 7q22         | 106685177 | 106802256 | 5577      | <i>PRKAR2B</i>     | 0.2794 | -2.5063 |
| adult | 7q22.3       | 106809405 | 106842974 | 26959     | <i>HBPI</i>        | 0.2794 | -2.5063 |
| adult | 7q31         | 106842188 | 107204959 | 10466     | <i>COG5</i>        | 0.2794 | -2.5063 |
| adult | 7q22-q31.1   | 107110501 | 107116125 | 2845      | <i>GPR22</i>       | 0.2794 | -2.5063 |
| adult | 7q22-q31     | 107204401 | 107218968 | 11062     | <i>DUS4L</i>       | 0.2794 | -2.5063 |
| adult | 7q22.3       | 107220421 | 107263762 | 55973     | <i>BCAP29</i>      | 0.2794 | -2.5063 |
| adult | 7q22.3       | 107296960 | 107302243 | 286002    | <i>SLC26A4-ASI</i> | 0.2794 | -2.5063 |
| adult | 7q31         | 107301079 | 107358252 | 5172      | <i>SLC26A4</i>     | 0.2794 | -2.5063 |

|       |              |           |           |        |                |        |         |
|-------|--------------|-----------|-----------|--------|----------------|--------|---------|
| adult | 7q22.3       | 107384141 | 107402112 | 79872  | <i>CBLL1</i>   | 0.2794 | -2.5063 |
| adult | 7q31         | 107405911 | 107443678 | 1811   | <i>SLC26A3</i> | 0.2794 | -2.5063 |
| adult | 7q31-q32     | 107531551 | 107561643 | 1738   | <i>DLD</i>     | 0.2794 | -2.5063 |
| adult | 7q22         | 107564245 | 107643804 | 3912   | <i>LAMB1</i>   | 0.2794 | -2.5063 |
| adult | 7q31         | 107663995 | 107770801 | 22798  | <i>LAMB4</i>   | 0.2794 | -2.5063 |
| adult | 7q31         | 107788070 | 107880614 | 4897   | <i>NRCAM</i>   | 0.2794 | -2.5063 |
| adult | 7q31         | 108110865 | 108166762 | 50640  | <i>PNPLA8</i>  | 0.2794 | -2.5063 |
| adult | 7q31.1       | 108202587 | 108209897 | 168451 | <i>THAP5</i>   | 0.2794 | -2.5063 |
| adult | 7q31         | 108210188 | 108215294 | 4189   | <i>DNAJB9</i>  | 0.2794 | -2.5063 |
| adult | 7q31.1       | 108524031 | 108524644 | 154907 | <i>C7orf66</i> | 0.2794 | -2.5247 |
| adult | 7p22.3       | 1094910   | 1098905   | 115330 | <i>GPR146</i>  | 0      | -1.8331 |
| adult | 7q31.1       | 109599283 | 109600270 | 442720 | <i>EIF3IP1</i> | 0.5528 | -2.6228 |
| adult | 7p21.3       | 10971579  | 10979813  | 4697   | <i>NDUFA4</i>  | 0.2466 | -2.947  |
| adult | 7p21.3       | 11013498  | 11147376  | 9678   | <i>PHF14</i>   | 0.2466 | -2.947  |
| adult | 7q31         | 110303105 | 111202347 | 83943  | <i>IMMP2L</i>  | 0.2734 | -2.6228 |
| adult | 7q31.1       | 110731061 | 110765509 | 54674  | <i>LRRN3</i>   | 0.2734 | -2.6228 |
| adult | 7q31.1       | 111366163 | 111846462 | 9732   | <i>DOCK4</i>   | 0.2734 | -2.6228 |
| adult | 7q31.1       | 111846642 | 111983989 | 11179  | <i>ZNF277</i>  | 0.2734 | -2.6228 |
| adult | 7q31.1       | 112063198 | 112117258 | 3475   | <i>IFRD1</i>   | 0.2734 | -2.6228 |
| adult | 7q31.1       | 112120907 | 112130943 | 286006 | <i>LSMEM1</i>  | 0.2734 | -2.6228 |
| adult | 7q31.32      | 112402436 | 112430478 | 64418  | <i>TMEM168</i> | 0.2734 | -2.6228 |
| adult | 7q31.1       | 112459201 | 112579932 | 154743 | <i>C7orf60</i> | 0.2734 | -2.6228 |
| adult | 7q31         | 112720467 | 112726393 | 54329  | <i>GPR85</i>   | 0.2734 | -2.6228 |
| adult | 7q31.1       | 113516881 | 113559082 | 5506   | <i>PPP1R3A</i> | 0.2734 | -2.6228 |
| adult | 7q31         | 113726364 | 114333827 | 93986  | <i>FOXP2</i>   | 0.2734 | -2.678  |
| adult | 7p21.3       | 11410061  | 11871824  | 221981 | <i>THSD7A</i>  | 0.2162 | -2.947  |
| adult | 7q31.1-q31.2 | 114562208 | 114563720 | 29969  | <i>MDF1C</i>   | 0.2734 | -2.7331 |
| adult | 7q31.2       | 115575201 | 115608367 | 22797  | <i>TFEC</i>    | 0.2734 | -2.7331 |
| adult | 7q31.2       | 115850546 | 115898837 | 26136  | <i>TES</i>     | 0.2734 | -2.7331 |
| adult | 7q31.1       | 116139654 | 116148595 | 858    | <i>CAV2</i>    | 0.2734 | -2.6812 |
| adult | 7q31.1       | 116164838 | 116201239 | 857    | <i>CAV1</i>    | 0.2734 | -2.6812 |
| adult | 7q31         | 116312458 | 116438440 | 4233   | <i>MET</i>     | 0.2734 | -2.6812 |
| adult | 7q31.2-q31.3 | 116502562 | 116559313 | 830    | <i>CAPZA2</i>  | 0.2734 | -2.6812 |

|       |              |           |           |        |                  |        |         |
|-------|--------------|-----------|-----------|--------|------------------|--------|---------|
| adult | 7q31.2       | 116592500 | 116594388 | 93653  | <i>ST7-ASI</i>   | 0.2734 | -2.6812 |
| adult | 7q31.2       | 116593380 | 116863961 | 7982   | <i>ST7</i>       | 0.2734 | -2.6812 |
| adult | 7q31.2       | 116593952 | 116599867 | 338069 | <i>ST7-OT4</i>   | 0.2734 | -2.6812 |
| adult | 7q31.2       | 116752345 | 116785646 | 93654  | <i>ST7-AS2</i>   | 0.2734 | -2.6812 |
| adult | 7q31.3       | 116822734 | 116849991 | 93655  | <i>ST7-OT3</i>   | 0.2734 | -2.6812 |
| adult | 7q31.2       | 116916685 | 116963343 | 7472   | <i>WNT2</i>      | 0.2734 | -2.6812 |
| adult | 7q31.2       | 117003275 | 117067577 | 136991 | <i>ASZ1</i>      | 0.2734 | -2.6812 |
| adult | 7q31.2       | 117120016 | 117308718 | 1080   | <i>CFTR</i>      | 0.2734 | -2.6296 |
| adult | 7q31         | 117350705 | 117513561 | 83992  | <i>CTTNBP2</i>   | 0.2734 | -2.5779 |
| adult | 17p13.1      | 117824085 | 117844093 | 84316  | <i>NAA38</i>     | 0.2734 | -2.5779 |
| adult | 7q31         | 117864711 | 117882784 | 56311  | <i>ANKRD7</i>    | 0.2734 | -2.5779 |
| adult | 7p22.3       | 1192542   | 1199855   | 90637  | <i>ZFAND2A</i>   | 0      | -1.8331 |
| adult | 7q31         | 119913721 | 120390387 | 3751   | <i>KCND2</i>     | 0.2734 | -2.7668 |
| adult | 7q31.31      | 120427373 | 120498177 | 23554  | <i>TSPAN12</i>   | 0.2734 | -2.7668 |
| adult | 7q31         | 120590816 | 120597034 | 54556  | <i>ING3</i>      | 0.2734 | -2.7668 |
| adult | 7q31.31      | 120628750 | 120937498 | 79974  | <i>CPED1</i>     | 0.2734 | -2.7668 |
| adult | 7q31         | 120965420 | 120981158 | 51384  | <i>WNT16</i>     | 0.2734 | -2.7668 |
| adult | 7q31         | 120988904 | 121036422 | 10447  | <i>FAM3C</i>     | 0.2734 | -2.7668 |
| adult | 7q31.3       | 121513158 | 121702090 | 5803   | <i>PTPRZ1</i>    | 0.2734 | -2.7668 |
| adult | 7q31.3       | 121713597 | 121784344 | 10157  | <i>AASS</i>      | 0.2734 | -2.7668 |
| adult | 7q31.32      | 121941362 | 121944565 | 389549 | <i>FEZF1</i>     | 0.2734 | -2.7668 |
| adult | 7q31.32      | 121943711 | 121950131 | 154860 | <i>FEZF1-ASI</i> | 0.2734 | -2.7668 |
| adult | 7q31.3       | 121958477 | 122526813 | 93664  | <i>CADPS2</i>    | 0.2734 | -2.7668 |
| adult | 7q31.32      | 122337765 | 122339208 | 168433 | <i>RNF133</i>    | 0.2734 | -2.7668 |
| adult | 7q31.33      | 122341719 | 122343021 | 378925 | <i>RNF148</i>    | 0.2734 | -2.7668 |
| adult | 7p21.3       | 12250847  | 12276890  | 54664  | <i>TMEM106B</i>  | 0      | -3.0829 |
| adult | 7q31.1-q31.3 | 122634758 | 122635754 | 50833  | <i>TAS2R16</i>   | 0.2734 | -2.7668 |
| adult | 7q31.32      | 122753587 | 122840025 | 6561   | <i>SLC13A1</i>   | 0.2734 | -2.7668 |
| adult | 7q31.32      | 123092235 | 123174718 | 154865 | <i>IQUB</i>      | 0.2734 | -2.7668 |
| adult | 7q31.33      | 123177051 | 123197958 | 4698   | <i>NDUFA5</i>    | 0.2734 | -2.7668 |
| adult | 7q31.31      | 123249076 | 123277934 | 142685 | <i>ASB15</i>     | 0.2734 | -2.7668 |
| adult | 7q31.32      | 123295860 | 123304147 | 442721 | <i>LMOD2</i>     | 0.2734 | -2.7668 |
| adult | 7q31.3       | 123321980 | 123389125 | 8976   | <i>WASL</i>      | 0.2734 | -2.7668 |

|       |              |           |           |        |                  |        |         |
|-------|--------------|-----------|-----------|--------|------------------|--------|---------|
| adult | 7q31.3       | 123454192 | 123459484 | 26062  | <i>HYALP1</i>    | 0.2734 | -2.7668 |
| adult | 7q31.3       | 123485222 | 123517531 | 23553  | <i>HYAL4</i>     | 0.2734 | -2.7668 |
| adult | 7q31.3       | 123565285 | 123600100 | 6677   | <i>SPAMI</i>     | 0.2734 | -2.7668 |
| adult | 7q31.32      | 123670969 | 123673523 | 730130 | <i>TMEM229A</i>  | 0.2734 | -2.7668 |
| adult | 7p21.3       | 12370508  | 12443852  | 221806 | <i>VWDE</i>      | 0      | -3.0856 |
| adult | 7q31         | 124385654 | 124406079 | 2861   | <i>GPR37</i>     | 0.2734 | -2.7668 |
| adult | 7q31.33      | 124417345 | 124430864 | 154872 | <i>LOC154872</i> | 0.2734 | -2.7668 |
| adult | 7q31.33      | 124462439 | 124570037 | 25913  | <i>POT1</i>      | 0.2734 | -2.7668 |
| adult | 7q31.3-q32.1 | 126078651 | 126883569 | 2918   | <i>GRM8</i>      | 0.5373 | -2.5166 |
| adult | 7p21.3       | 12610202  | 12693228  | 85477  | <i>SCIN</i>      | 0      | -3.3629 |
| adult | 7q31.33      | 126698141 | 126698238 | 693177 | <i>MIR592</i>    | 0.5373 | -2.8215 |
| adult | 7q31.33      | 127010096 | 127032778 | 168850 | <i>ZNF800</i>    | 0.5373 | -2.8215 |
| adult | 7q32.1       | 127220681 | 127225654 | 79571  | <i>GCC1</i>      | 0.3008 | -2.3982 |
| adult | 7q31.3       | 127228405 | 127231759 | 381    | <i>ARF5</i>      | 0.3008 | -2.3982 |
| adult | 7q31.3       | 127233688 | 127241851 | 29999  | <i>FSCN3</i>     | 0.3008 | -2.3982 |
| adult | 7q32         | 127250345 | 127255780 | 5078   | <i>PAX4</i>      | 0.3008 | -2.3982 |
| adult | 7p21.3       | 12726451  | 12730558  | 10124  | <i>ARL4A</i>     | 0      | -3.3629 |
| adult | 7p22.3       | 1272653   | 1276613   | 340260 | <i>UNCX</i>      | 0      | -1.8331 |
| adult | 7q31.3       | 127292201 | 127732659 | 27044  | <i>SND1</i>      | 0.3008 | -2.3982 |
| adult | 7q31         | 127637561 | 127640130 | 27099  | <i>SND1-IT1</i>  | 0.3008 | -2.3982 |
| adult | 7q31.3       | 127667123 | 127671002 | 64101  | <i>LRRC4</i>     | 0.3008 | -2.3982 |
| adult | 7q32.1       | 127721912 | 127722012 | 693178 | <i>MIR593</i>    | 0.3008 | -2.3982 |
| adult | 7q32.1       | 127847924 | 127847996 | 406917 | <i>MIR129-1</i>  | 0.3008 | -2.3982 |
| adult | 7q31.3       | 127881330 | 127897682 | 3952   | <i>LEP</i>       | 0.3008 | -2.3982 |
| adult | 7q32.1       | 127937737 | 127947816 | 157247 | <i>MGC27345</i>  | 0.3008 | -2.3982 |
| adult | 7q32.1       | 127950435 | 127983962 | 55131  | <i>RBM28</i>     | 0.3008 | -2.3982 |
| adult | 7q32.1       | 127990378 | 128001739 | 401399 | <i>PRRT4</i>     | 0.3008 | -2.3982 |
| adult | 7q31.3-q32   | 128032330 | 128046024 | 3614   | <i>IMPDH1</i>    | 0.3008 | -2.3982 |
| adult | 7q32.1       | 128095883 | 128098472 | 29923  | <i>HILPDA</i>    | 0.3008 | -2.3982 |
| adult | 7q32.1       | 128116782 | 128142978 | 55798  | <i>METTL2B</i>   | 0.3008 | -2.3982 |
| adult | 7q32.1       | 128312319 | 128327926 | 346653 | <i>FAM71F2</i>   | 0.3008 | -2.3982 |
| adult | 7q32.1       | 128355395 | 128371797 | 84691  | <i>FAM71F1</i>   | 0.3008 | -2.3982 |
| adult | 7q32.1       | 128379345 | 128413477 | 813    | <i>CALU</i>      | 0.3008 | -2.3982 |



|       |          |           |           |           |                     |        |         |
|-------|----------|-----------|-----------|-----------|---------------------|--------|---------|
| adult | 7q32.1   | 128412542 | 128415844 | 611       | <i>OPN1SW</i>       | 0.3008 | -2.3982 |
| adult | 7q33     | 128431463 | 128462187 | 64753     | <i>CCDC136</i>      | 0.3008 | -2.3982 |
| adult | 7q32-q35 | 128470482 | 128499328 | 2318      | <i>FLNC</i>         | 0.3008 | -2.3982 |
| adult | 7q32     | 128502856 | 128505903 | 9296      | <i>ATP6V1F</i>      | 0.3008 | -2.3982 |
| adult | 7q32.1   | 128506463 | 128512101 | 100130705 | <i>LOC100130705</i> | 0.3008 | -2.3982 |
| adult | 7q32.1   | 128516918 | 128550773 | 375616    | <i>KCP</i>          | 0.3008 | -2.3982 |
| adult | 7q32     | 128577990 | 128590096 | 3663      | <i>IRF5</i>         | 0.3008 | -2.3982 |
| adult | 7q32.1   | 128594233 | 128695227 | 23534     | <i>TNPO3</i>        | 0.3008 | -2.3982 |
| adult | 7q32.1   | 128695276 | 128697293 | 286016    | <i>TPI1P2</i>       | 0.3008 | -2.3982 |
| adult | 7q32.3   | 128766324 | 128768050 | 407835    | <i>LOC407835</i>    | 0.3008 | -2.3982 |
| adult | 7q32.1   | 128784711 | 128809535 | 340348    | <i>TSPAN33</i>      | 0.3008 | -2.3982 |
| adult | 7q32.3   | 128828712 | 128853385 | 6608      | <i>SMO</i>          | 0.3008 | -2.3982 |
| adult | 7q32.1   | 128864854 | 129070052 | 23382     | <i>AHCYL2</i>       | 0.3008 | -2.3982 |
| adult | 7q32.1   | 129074273 | 129123475 | 57464     | <i>STRIP2</i>       | 0.3008 | -2.3982 |
| adult | 7q32.1   | 129142319 | 129152773 | 100287482 | <i>SMKRI</i>        | 0.3008 | -2.3982 |
| adult | 7q32     | 129251542 | 129396922 | 4899      | <i>NRF1</i>         | 0.3008 | -2.3982 |
| adult | 7q32.2   | 129410222 | 129410332 | 406958    | <i>MIR182</i>       | 0.3008 | -2.3982 |
| adult | 7q32.2   | 129414532 | 129414609 | 407053    | <i>MIR96</i>        | 0.3008 | -2.3982 |
| adult | 7q32.2   | 129414744 | 129414854 | 406959    | <i>MIR183</i>       | 0.3008 | -2.3982 |
| adult | 7q32     | 129470572 | 129592783 | 7328      | <i>UBE2H</i>        | 0.3008 | -2.3982 |
| adult | 7q32.2   | 129658125 | 129691291 | 51530     | <i>ZC3HC1</i>       | 0.3008 | -2.3982 |
| adult | 7q32.2   | 129710348 | 129775560 | 23008     | <i>KLHDC10</i>      | 0.3008 | -2.3982 |
| adult | 7q32.2   | 129804554 | 129845338 | 84928     | <i>TMEM209</i>      | 0.3008 | -2.3982 |
| adult | 7q32.2   | 129847703 | 129856684 | 136263    | <i>SSMEM1</i>       | 0.3008 | -2.3982 |
| adult | 7q32     | 129906702 | 129929637 | 1358      | <i>CPA2</i>         | 0.3008 | -2.3982 |
| adult | 7q32     | 129932973 | 129964020 | 51200     | <i>CPA4</i>         | 0.3008 | -2.3982 |
| adult | 7q32     | 129984629 | 130008569 | 93979     | <i>CPA5</i>         | 0.3008 | -2.3982 |
| adult | 7q32     | 130020211 | 130027949 | 1357      | <i>CPA1</i>         | 0.3008 | -2.3982 |
| adult | 7q32     | 130033611 | 130081051 | 95681     | <i>CEP41</i>        | 0.3008 | -2.3982 |
| adult | 7q32     | 130126015 | 130146138 | 4232      | <i>MEST</i>         | 0.3008 | -2.3982 |
| adult | 7q32.2   | 130126897 | 130131013 | 317751    | <i>MESTIT1</i>      | 0.3008 | -2.3982 |
| adult | 7q32.2   | 130135951 | 130136045 | 442904    | <i>MIR335</i>       | 0.3008 | -2.3982 |
| adult | 7q32     | 130146079 | 130353598 | 26958     | <i>COPG2</i>        | 0.3008 | -2.3982 |

|       |            |           |           |        |                  |        |         |
|-------|------------|-----------|-----------|--------|------------------|--------|---------|
| adult | 7q32       | 130353485 | 130371406 | 114960 | <i>TSGA13</i>    | 0.3008 | -2.3982 |
| adult | 7q32.3     | 130417381 | 130418860 | 136259 | <i>KLF14</i>     | 0.3008 | -2.3982 |
| adult | 7q32.3     | 130561505 | 130561569 | 407021 | <i>MIR29A</i>    | 0.3008 | -2.3982 |
| adult | 7q32.3     | 130562217 | 130562298 | 407024 | <i>MIR29B1</i>   | 0.3008 | -2.3982 |
| adult | 7q32       | 130794854 | 131181398 | 4289   | <i>MKLN1</i>     | 0.3008 | -2.3982 |
| adult | 7q32-q33   | 131185020 | 131241376 | 5420   | <i>PODXL</i>     | 0.3008 | -2.3982 |
| adult | 7q32.3     | 131808090 | 132261323 | 91584  | <i>PLXNA4</i>    | 0.3008 | -2.3982 |
| adult | 7q32.3     | 132333552 | 132413528 | 286023 | <i>FLJ40288</i>  | 0.5034 | -2.3982 |
| adult | 7q33       | 132469622 | 132766918 | 54927  | <i>CHCHD3</i>    | 0.5034 | -2.3982 |
| adult | 7q31       | 132937822 | 133168946 | 60412  | <i>EXOC4</i>     | 0.5034 | -2.3982 |
| adult | 7q33       | 133812104 | 133948933 | 136332 | <i>LRGUK</i>     | 0.5034 | -2.4144 |
| adult | 7q33       | 133974089 | 134001827 | 84912  | <i>SLC35B4</i>   | 0.5034 | -2.4144 |
| adult | 7q35       | 134127106 | 134143888 | 231    | <i>AKR1B1</i>    | 0.5034 | -2.4144 |
| adult | 7q33       | 134212343 | 134226166 | 57016  | <i>AKR1B10</i>   | 0.5034 | -2.4144 |
| adult | 7q33       | 134233848 | 134264592 | 441282 | <i>AKR1B15</i>   | 0.5034 | -2.4144 |
| adult | 7q33       | 134331530 | 134364567 | 669    | <i>BPGM</i>      | 0.5034 | -2.4144 |
| adult | 7q33       | 134464163 | 134655480 | 800    | <i>CALD1</i>     | 0.5034 | -2.4144 |
| adult | 7q33       | 134671258 | 134820530 | 340351 | <i>AGBL3</i>     | 0.5034 | -2.4144 |
| adult | 7q33       | 134832765 | 134850967 | 55281  | <i>TMEM140</i>   | 0.5034 | -2.4144 |
| adult | 7q33       | 134850531 | 134854226 | 78996  | <i>C7orf49</i>   | 0.5034 | -2.4144 |
| adult | 7q33       | 134868589 | 134896316 | 29062  | <i>WDR91</i>     | 0.5034 | -2.4144 |
| adult | 7q33       | 134916730 | 134943244 | 346673 | <i>STRA8</i>     | 0.5034 | -2.4144 |
| adult | 7q33       | 135046546 | 135194875 | 4850   | <i>CNOT4</i>     | 0.5034 | -2.4286 |
| adult | 7q33       | 135242661 | 135333499 | 23165  | <i>NUP205</i>    | 0.5034 | -2.4428 |
| adult | 7q33       | 135347220 | 135361160 | 647087 | <i>C7orf73</i>   | 0.5034 | -2.4428 |
| adult | 7q33       | 135365986 | 135412933 | 26266  | <i>SLC13A4</i>   | 0.5034 | -2.4428 |
| adult | 7q33       | 135414345 | 135433594 | 389558 | <i>FAM180A</i>   | 0.5034 | -2.4428 |
| adult | 7q33       | 135611502 | 135662204 | 767558 | <i>LUZP6</i>     | 0.5034 | -2.4428 |
| adult | 7q31-q35   | 136553398 | 136701771 | 1129   | <i>CHRM2</i>     | 0.5034 | -2.4428 |
| adult | 7q34       | 136583519 | 136849088 | 349160 | <i>LOC349160</i> | 0.5034 | -2.4428 |
| adult | 7q33       | 136587913 | 136588041 | 574443 | <i>MIR490</i>    | 0.5034 | -2.4428 |
| adult | 7q33       | 136912091 | 137028546 | 5764   | <i>PTN</i>       | 0.5034 | -2.4428 |
| adult | 7q32.3-q33 | 137074384 | 137531609 | 9162   | <i>DGKI</i>      | 0.5034 | -2.4428 |

|       |          |           |           |           |                       |        |         |
|-------|----------|-----------|-----------|-----------|-----------------------|--------|---------|
| adult | 7q34     | 137559724 | 137686847 | 64764     | <i>CREB3L2</i>        | 0.5034 | -2.4428 |
| adult | 7q33     | 137638093 | 137642712 | 100130880 | <i>LOC100130880</i>   | 0.5034 | -2.4428 |
| adult | 7q32-q33 | 137761177 | 137803050 | 6718      | <i>AKR1D1</i>         | 0.5034 | -2.4428 |
| adult | 7q32-q34 | 138145078 | 138270332 | 8805      | <i>TRIM24</i>         | 0.5034 | -2.4428 |
| adult | 7q34     | 138279029 | 138348969 | 136306    | <i>SVOPL</i>          | 0.5034 | -2.4428 |
| adult | 7q34     | 138391038 | 138458782 | 50617     | <i>ATP6V0A4</i>       | 0.5034 | -2.4428 |
| adult | 7q34     | 138482738 | 138490769 | 155006    | <i>TMEM213</i>        | 0.5034 | -2.4428 |
| adult | 7q34     | 138516126 | 138666064 | 57670     | <i>KIAA1549</i>       | 0.5034 | -2.4428 |
| adult | 7q34     | 138710451 | 138720775 | 92092     | <i>ZC3HAV1L</i>       | 0.5034 | -2.4428 |
| adult | 7q34     | 138728265 | 138794465 | 56829     | <i>ZC3HAV1</i>        | 0.5034 | -2.4428 |
| adult | 7q34     | 138818489 | 138876732 | 79989     | <i>TTC26</i>          | 0.5034 | -2.4428 |
| adult | 7q34     | 138916230 | 138992982 | 254048    | <i>UBN2</i>           | 0.5034 | -2.4428 |
| adult | 7q34     | 139025104 | 139108203 | 51631     | <i>LUC7L2</i>         | 0.5034 | -2.4428 |
| adult | 7q34     | 139025877 | 139031065 | 154791    | <i>C7orf55</i>        | 0.5034 | -2.4428 |
| adult | 7q       | 139025877 | 139108203 | 100996928 | <i>C7orf55-LUC7L2</i> | 0.5034 | -2.4428 |
| adult | 7q34     | 139102208 | 139112272 | 100129148 | <i>LOC100129148</i>   | 0.5034 | -2.4428 |
| adult | 7q34     | 139138087 | 139168457 | 346689    | <i>KLRG2</i>          | 0.5034 | -2.4428 |
| adult | 7q34     | 139208673 | 139229731 | 154790    | <i>CLEC2L</i>         | 0.5034 | -2.4428 |
| adult | 7q34     | 139246315 | 139477693 | 28996     | <i>HIPK2</i>          | 0.5034 | -2.4428 |
| adult | 7p21.3   | 13930855  | 14026139  | 2115      | <i>ETV1</i>           | 0      | -3.5222 |
| adult | 7q34-q35 | 139478046 | 139720125 | 6916      | <i>TBXAS1</i>         | 0.5034 | -2.4428 |
| adult | 7q34     | 139723543 | 139763521 | 64761     | <i>PARP12</i>         | 0.5034 | -2.4428 |
| adult | 7q34     | 140033551 | 140098350 | 84255     | <i>SLC37A3</i>        | 0.5034 | -2.4428 |
| adult | 7q34     | 140103842 | 140126050 | 401409    | <i>RAB19</i>          | 0.5034 | -2.4428 |
| adult | 7q34     | 140152839 | 140179369 | 23608     | <i>MKRN1</i>          | 0.5034 | -2.4428 |
| adult | 7q34     | 140218219 | 140302342 | 27147     | <i>DENND2A</i>        | 0.5034 | -2.4428 |
| adult | 7q34     | 140372952 | 140394908 | 90956     | <i>ADCK2</i>          | 0.5034 | -2.4428 |
| adult | 7q34     | 140395135 | 140396877 | 100134713 | <i>NDUFB2-AS1</i>     | 0.5034 | -2.4428 |
| adult | 7q34     | 140396480 | 140406446 | 4708      | <i>NDUFB2</i>         | 0.5034 | -2.4428 |
| adult | 7q34     | 140433812 | 140624564 | 673       | <i>BRAF</i>           | 0.5034 | -2.4428 |
| adult | 7q34     | 140705960 | 140714479 | 51650     | <i>MRPS33</i>         | 0.5034 | -2.4428 |
| adult | 7q34     | 140774031 | 141180179 | 100507421 | <i>TMEM178B</i>       | 0.5034 | -2.4428 |
| adult | 7q34     | 141251077 | 141354209 | 55750     | <i>AGK</i>            | 0.5034 | -2.4428 |

|       |            |           |           |           |                 |        |         |
|-------|------------|-----------|-----------|-----------|-----------------|--------|---------|
| adult | 7q34       | 141356527 | 141401953 | 57189     | <i>KIAA1147</i> | 0.5034 | -2.4428 |
| adult | 7q34       | 141404137 | 141438030 | 285962    | <i>WEE2-ASI</i> | 0.5034 | -2.4428 |
| adult | 7q32       | 141408152 | 141431071 | 494551    | <i>WEE2</i>     | 0.5034 | -2.4428 |
| adult | 7q34       | 141438120 | 141450288 | 6742      | <i>SSBP1</i>    | 0.5034 | -2.4428 |
| adult | 7q31.3-q32 | 141463896 | 141464997 | 50831     | <i>TAS2R3</i>   | 0.5034 | -2.4428 |
| adult | 7q31.3-q32 | 141478288 | 141479188 | 50832     | <i>TAS2R4</i>   | 0.5034 | -2.4428 |
| adult | 7q31.3-q32 | 141490016 | 141491166 | 54429     | <i>TAS2R5</i>   | 0.5034 | -2.4428 |
| adult | 7q34       | 141536077 | 141541221 | 136242    | <i>PRSS37</i>   | 0.5034 | -2.4428 |
| adult | 7q34       | 141618675 | 141619620 | 130075    | <i>OR9A4</i>    | 0.5034 | -2.4428 |
| adult | 7q33       | 141627156 | 141646783 | 23601     | <i>CLECSA</i>   | 0.5034 | -2.4428 |
| adult | 7q34       | 141672430 | 141673573 | 5726      | <i>TAS2R38</i>  | 0.5034 | -2.4428 |
| adult | 7q34       | 141695678 | 141806547 | 8972      | <i>MGAM</i>     | 0.5034 | -2.3783 |
| adult | 7p21.2     | 14184673  | 14881075  | 1607      | <i>DGKB</i>     | 0      | -3.5081 |
| adult | 7q34       | 141940555 | 141946886 | 100289017 | <i>MOXD2P</i>   | 0.5034 | -2.3138 |
| adult | 7q34       | 141951957 | 141957878 | 136541    | <i>PRSS58</i>   | 0.5034 | -2.3138 |
| adult | 7q34       | 142374130 | 142375525 | 100463482 | <i>MTRNR2L6</i> | 0.3008 | -2.3138 |
| adult | 7q34       | 142457318 | 142460927 | 5644      | <i>PRSS1</i>    | 0.3008 | -1.6321 |
| adult | 7q33-q35   | 142560513 | 142568847 | 2051      | <i>EPHB6</i>    | 0.3008 | -2.1912 |
| adult | 7q34       | 142568955 | 142583490 | 55503     | <i>TRPV6</i>    | 0.3008 | -2.1912 |
| adult | 7q35       | 142605266 | 142630820 | 56302     | <i>TRPV5</i>    | 0.3008 | -2.1912 |
| adult | 7q34       | 142636602 | 142637957 | 135927    | <i>C7orf34</i>  | 0.3008 | -2.1912 |
| adult | 7q33       | 142638200 | 142659503 | 3792      | <i>KEL</i>      | 0.3008 | -2.1912 |
| adult | 7q34       | 142723286 | 142724219 | 135924    | <i>OR9A2</i>    | 0.3008 | -2.1912 |
| adult | 7q34       | 142749437 | 142750379 | 346517    | <i>OR6V1</i>    | 0.3008 | -2.1912 |
| adult | 7q34       | 142759380 | 142760882 | 89883     | <i>OR6W1P</i>   | 0.3008 | -2.1912 |
| adult | 7q34       | 142829173 | 142836834 | 5304      | <i>PIP</i>      | 0.3008 | -2.1912 |
| adult | 7q34       | 142880511 | 142881528 | 259285    | <i>TAS2R39</i>  | 0.3008 | -2.1912 |
| adult | 7q34       | 142919171 | 142920143 | 259286    | <i>TAS2R40</i>  | 0.3008 | -2.1912 |
| adult | 7q34       | 142960521 | 142966222 | 373156    | <i>GSTK1</i>    | 0.3008 | -2.1912 |
| adult | 7q34       | 142981991 | 142985142 | 135932    | <i>TMEM139</i>  | 0.3008 | -2.1912 |
| adult | 7q34-q35   | 142985307 | 143004789 | 835       | <i>CASP2</i>    | 0.3008 | -2.1912 |
| adult | 7q35       | 143013218 | 143049097 | 1180      | <i>CLCNI</i>    | 0.3008 | -2.1912 |
| adult | 7q34       | 143050492 | 143059173 | 9715      | <i>FAM131B</i>  | 0.3008 | -2.1912 |

|       |          |           |           |           |                  |        |         |
|-------|----------|-----------|-----------|-----------|------------------|--------|---------|
| adult | 7q32     | 143078359 | 143088206 | 7791      | <i>ZYX</i>       | 0.3008 | -2.1912 |
| adult | 7q34     | 143088204 | 143105985 | 2041      | <i>EPHA1</i>     | 0.3008 | -2.1912 |
| adult | 7q35     | 143104905 | 143220540 | 285965    | <i>EPHA1-AS1</i> | 0.3008 | -2.1912 |
| adult | 7q35     | 143140545 | 143141502 | 338398    | <i>TAS2R60</i>   | 0.3008 | -2.1912 |
| adult | 7q35     | 143174965 | 143175889 | 259287    | <i>TAS2R41</i>   | 0.3008 | -2.1912 |
| adult | 7q35     | 143268893 | 143271480 | 441294    | <i>CTAGE15</i>   | 0.3008 | -2.1912 |
| adult | 7q35     | 143452181 | 143454843 | 340307    | <i>CTAGE6</i>    | 0.3008 | -1.929  |
| adult | 7q35     | 143509060 | 143533810 | 154761    | <i>LOC154761</i> | 0.3008 | -1.929  |
| adult | 7q35     | 143632325 | 143633279 | 135948    | <i>OR2F2</i>     | 0.3008 | -2.1747 |
| adult | 7q35     | 143657019 | 143658108 | 26211     | <i>OR2F1</i>     | 0.3008 | -2.1747 |
| adult | 7q35     | 143701089 | 143702025 | 135946    | <i>OR6B1</i>     | 0.3008 | -2.1747 |
| adult | 7q35     | 143747494 | 143748430 | 393046    | <i>OR2A5</i>     | 0      | -2.1331 |
| adult | 7q35     | 143771312 | 143772245 | 392138    | <i>OR2A25</i>    | 0      | -2.1331 |
| adult | 7q35     | 143792200 | 143793133 | 346525    | <i>OR2A12</i>    | 0      | -2.1331 |
| adult | 7q35     | 143806675 | 143807632 | 442361    | <i>OR2A2</i>     | 0      | -2.1331 |
| adult | 7q35     | 143826205 | 143827138 | 135941    | <i>OR2A14</i>    | 0      | -2.1331 |
| adult | 7q35     | 143880547 | 143883173 | 100128553 | <i>CTAGE4</i>    | 0      | -2.1331 |
| adult | 7q35     | 143883175 | 143892791 | 445328    | <i>ARHGEF35</i>  | 0      | -2.1331 |
| adult | 7q35     | 143929003 | 143929936 | 346528    | <i>OR2A1</i>     | 0.3858 | -2.1331 |
| adult | 7q35     | 143947563 | 143948548 | 441295    | <i>OR2A9P</i>    | 0.3858 | -2.1331 |
| adult | 7q35     | 143955788 | 143956721 | 401427    | <i>OR2A7</i>     | 0.3858 | -2.1331 |
| adult | 7q35     | 143956088 | 143983096 | 728377    | <i>ARHGEF34P</i> | 0.3858 | -2.1331 |
| adult | 7q35     | 144052488 | 144077725 | 7984      | <i>ARHGEF5</i>   | 0.3858 | -2.2606 |
| adult | 7q35     | 144094332 | 144107320 | 135935    | <i>NOBOX</i>     | 0.3858 | -2.2606 |
| adult | 7q34-q35 | 144149033 | 144533146 | 27010     | <i>TPK1</i>      | 0.3858 | -2.2606 |
| adult | 7q35     | 145813452 | 148118088 | 26047     | <i>CNTNAP2</i>   | 0.3858 | -2.2722 |
| adult | 7q35     | 147075108 | 147075213 | 100313895 | <i>MIR548F4</i>  | 0.2999 | -2.5048 |
| adult | 7p22.3   | 1473994   | 1499109   | 79778     | <i>MICALL2</i>   | 0      | -2.055  |
| adult | 7q36.1   | 148287656 | 148312952 | 202865    | <i>C7orf33</i>   | 0.3385 | -1.8463 |
| adult | 7q36.1   | 148395932 | 148498202 | 8454      | <i>CUL1</i>      | 0.3385 | -1.7713 |
| adult | 7q35-q36 | 148504463 | 148580601 | 2146      | <i>EZH2</i>      | 0.3385 | -1.6963 |
| adult | 7q35     | 148700153 | 148725782 | 9601      | <i>PDIA4</i>     | 0.3385 | -1.6963 |
| adult | 7q36.1   | 148766732 | 148787869 | 136051    | <i>ZNF786</i>    | 0.3385 | -1.3896 |

|       |        |           |           |           |                      |         |         |
|-------|--------|-----------|-----------|-----------|----------------------|---------|---------|
| adult | 7q36.1 | 148799877 | 148823438 | 155054    | <i>ZNF425</i>        | 0.3385  | -1.3896 |
| adult | 7q36.1 | 148823507 | 148880118 | 57541     | <i>ZNF398</i>        | 0.3385  | -1.3896 |
| adult | 7q36.1 | 148892553 | 148923339 | 8427      | <i>ZNF282</i>        | 0.3385  | -1.3896 |
| adult | 7q36.1 | 148936741 | 148952700 | 7988      | <i>ZNF212</i>        | 0.3385  | -1.3896 |
| adult | 7q36.1 | 148982371 | 148994403 | 155060    | <i>LOC155060</i>     | 0.3385  | -1.3896 |
| adult | 7q36.1 | 149128453 | 149158053 | 27153     | <i>ZNF777</i>        | 0.3385  | -1.3896 |
| adult | 7q36.1 | 149169883 | 149194898 | 155061    | <i>ZNF746</i>        | 0.3385  | -1.3896 |
| adult | 7q36   | 149412101 | 149431664 | 84626     | <i>KRBA1</i>         | 0.3385  | -1.3896 |
| adult | 7q36.1 | 149461452 | 149470295 | 168544    | <i>ZNF467</i>        | 0.3385  | -1.3896 |
| adult | 7q36.1 | 149473130 | 149531053 | 23145     | <i>SSPO</i>          | 0.3385  | -1.3896 |
| adult | 7q36.1 | 149535508 | 149564568 | 643641    | <i>ZNF862</i>        | 0.3385  | -1.3896 |
| adult | 7q36.1 | 149564782 | 149570951 | 401431    | <i>ATP6V0E2-AS1</i>  | 0.3385  | -1.3896 |
| adult | 7q36.1 | 149570056 | 149577801 | 155066    | <i>ATP6V0E2</i>      | 0.3385  | -1.3896 |
| adult | 7q36.1 | 149944300 | 150020758 | 653857    | <i>ACTR3C</i>        | 0.3385  | -1.3896 |
| adult | 7q36.1 | 150020295 | 150035245 | 65999     | <i>LRRC61</i>        | 0.3385  | -1.3896 |
| adult | 7q36.1 | 150026937 | 150029811 | 113763    | <i>ZBED6CL</i>       | 0.3385  | -1.3896 |
| adult | 7q36.1 | 150035406 | 150038763 | 5919      | <i>RARRES2</i>       | 0.3385  | -1.3896 |
| adult | 7q36.1 | 150065878 | 150071133 | 29803     | <i>REPIN1</i>        | 0.3385  | -1.3896 |
| adult | 7q36.1 | 150076405 | 150095719 | 285971    | <i>ZNF775</i>        | 0.3385  | -1.3896 |
| adult | 7q36.1 | 150102839 | 150109558 | 728743    | <i>LOC728743</i>     | 0.3385  | -1.3896 |
| adult | 7q36.1 | 150147717 | 150176483 | 155038    | <i>GIMAP8</i>        | 0.3385  | -1.3896 |
| adult | 7q36.1 | 150211944 | 150218161 | 168537    | <i>GIMAP7</i>        | 0.3385  | -1.3896 |
| adult | 7q36.1 | 150264457 | 150271041 | 55303     | <i>GIMAP4</i>        | 0.3385  | -1.3896 |
| adult | 7q36.1 | 150382793 | 150390728 | 26157     | <i>GIMAP2</i>        | 0.3385  | -1.3896 |
| adult | 7q36.1 | 150413644 | 150421368 | 170575    | <i>GIMAP1</i>        | 0.3385  | -1.3896 |
| adult | 7q     | 150413644 | 150440737 | 100527949 | <i>GIMAP1-GIMAP5</i> | 0.3385  | -1.3896 |
| adult | 7q36.1 | 150434435 | 150440737 | 55340     | <i>GIMAP5</i>        | 0.3385  | -1.3896 |
| adult | 7q36.1 | 150488375 | 150497621 | 28959     | <i>TMEM176B</i>      | 0.3385  | -1.3896 |
| adult | 7q36.1 | 150497853 | 150502208 | 55365     | <i>TMEM176A</i>      | 0.3385  | -1.3896 |
| adult | 7p22.3 | 1509912   | 1544018   | 26173     | <i>INTS1</i>         | 0       | -2.055  |
| adult | 7q36.1 | 151832009 | 152133090 | 58508     | <i>KMT2C</i>         | 0.3385  | -1.3225 |
| adult | 7p21.2 | 15239942  | 15601640  | 392636    | <i>AGMO</i>          | 0       | -3.4939 |
| adult | 7q36.2 | 153584181 | 154686000 | 1804      | <i>DPP6</i>          | 0.30765 | -1.6464 |

|       |              |           |           |           |                  |         |         |
|-------|--------------|-----------|-----------|-----------|------------------|---------|---------|
| adult | 7q36         | 154735399 | 154794682 | 22976     | <i>PAXIP1</i>    | 0.2768  | -1.5379 |
| adult | 7q36.1       | 154862033 | 154879102 | 3361      | <i>HTR5A</i>     | 0.2768  | -1.5379 |
| adult | 7q36         | 155089485 | 155101945 | 3638      | <i>INSIG1</i>    | 0.2768  | -1.5379 |
| adult | 7q36         | 155250823 | 155257526 | 2020      | <i>EN2</i>       | 0.2768  | -1.5379 |
| adult | 7q36.3       | 155293952 | 155326539 | 285888    | <i>CNPY1</i>     | 0.2768  | -1.5379 |
| adult | 7q36.3       | 155437202 | 155574179 | 155435    | <i>RBM33</i>     | 0.2768  | -1.5379 |
| adult | 7q36         | 155594933 | 155604967 | 6469      | <i>SHH</i>       | 0.2768  | -1.5379 |
| adult | 7q36.3       | 156230482 | 156238282 | 285889    | <i>LOC285889</i> | 0.2768  | -1.5379 |
| adult | 7q36         | 156333184 | 156333795 | 64433     | <i>LINC00244</i> | 0.2768  | -1.5379 |
| adult | 7q36.3       | 156431059 | 156433348 | 129790    | <i>C7orf13</i>   | 0.2768  | -1.5379 |
| adult | 7q36         | 156433352 | 156469820 | 140545    | <i>RNF32</i>     | 0.2768  | -1.5379 |
| adult | 7q36         | 156473569 | 156685902 | 64327     | <i>LMBR1</i>     | 0.2768  | -1.5379 |
| adult | 7p22.1-p21.3 | 15650836  | 15726308  | 4223      | <i>MEOX2</i>     | 0       | -3.4831 |
| adult | 7q36.3       | 156742416 | 156765876 | 64434     | <i>NOM1</i>      | 0.2768  | -1.5379 |
| adult | 7q36         | 156797546 | 156802129 | 3110      | <i>MNX1</i>      | 0.2768  | -1.5379 |
| adult | 7q36.3       | 156931654 | 157062066 | 9690      | <i>UBE3C</i>     | 0.2768  | -1.5379 |
| adult | 7p22.3       | 1570367   | 1582679   | 7975      | <i>MAFK</i>      | 0.425   | -2.055  |
| adult | 7q36.3       | 157129709 | 157179018 | 10049     | <i>DNAJB6</i>    | 0.2768  | -1.5379 |
| adult | 7q36         | 157331745 | 158380494 | 5799      | <i>PTPRN2</i>    | 0.38745 | -1.511  |
| adult | 7q36.3       | 157367027 | 157367114 | 406945    | <i>MIR153-2</i>  | 0.2768  | -1.5379 |
| adult | 7p22.3       | 1581870   | 1596066   | 202915    | <i>TMEM184A</i>  | 0.425   | -2.055  |
| adult | 7q36.3       | 158325409 | 158325505 | 693180    | <i>MIR595</i>    | 0.4981  | -1.3773 |
| adult | 7q36.3       | 158423860 | 158497522 | 54892     | <i>NCAPG2</i>    | 0.4981  | -1.3773 |
| adult | 7p22.3       | 1606969   | 1609629   | 84262     | <i>PSMG3</i>     | 0.425   | -2.055  |
| adult | 7p22.3       | 1609708   | 1629261   | 114796    | <i>PSMG3-AS1</i> | 0.425   | -2.055  |
| adult | 7p21.2       | 16127151  | 16460947  | 729920    | <i>ISPD</i>      | 0       | -3.4113 |
| adult | 7p21.1       | 16501105  | 16505474  | 25928     | <i>SOSTDC1</i>   | 0       | -3.3395 |
| adult | 7p22.3       | 1654105   | 1656328   | 260341    | <i>TFAMP1</i>    | 0.425   | -2.055  |
| adult | 7p21.1       | 16566504  | 16621114  | 100506049 | <i>LRRC72</i>    | 0       | -3.3395 |
| adult | 7p21         | 16639400  | 16685442  | 57037     | <i>ANKMY2</i>    | 0       | -3.3395 |
| adult | 7p21.1       | 16685758  | 16746148  | 28969     | <i>BZW2</i>      | 0       | -3.3395 |
| adult | 7p21.1       | 16793350  | 16824161  | 27075     | <i>TSPAN13</i>   | 0       | -3.3395 |
| adult | 7p21.3       | 16832263  | 16844738  | 10551     | <i>AGR2</i>      | 0       | -3.3395 |

|       |        |          |          |           |                  |        |         |
|-------|--------|----------|----------|-----------|------------------|--------|---------|
| adult | 7p21.1 | 16899029 | 16921613 | 155465    | <i>AGR3</i>      | 0      | -3.3395 |
| adult | 7p15   | 17338275 | 17385775 | 196       | <i>AHR</i>       | 0      | -3.0542 |
| adult | 7p22.3 | 1748797  | 1787590  | 392617    | <i>ELFNI</i>     | 0.425  | -2.044  |
| adult | 7p21.1 | 17830384 | 17980131 | 23161     | <i>SNX13</i>     | 0      | -3.0542 |
| adult | 7p21.1 | 18066399 | 18067486 | 221823    | <i>PRPS1L1</i>   | 0      | -3.0542 |
| adult | 7p21.1 | 18126571 | 18708466 | 9734      | <i>HDAC9</i>     | 0      | -3.0542 |
| adult | 7p22   | 1855427  | 2272583  | 8379      | <i>MAD1L1</i>    | 0.425  | -2.044  |
| adult | 7p21.2 | 19155090 | 19157295 | 7291      | <i>TWIST1</i>    | 0      | -3.0542 |
| adult | 7p21.1 | 19184404 | 19185044 | 222894    | <i>FERD3L</i>    | 0      | -3.0542 |
| adult | 7p22.3 | 192968   | 300740   | 56975     | <i>FAM20C</i>    | 0      | -1.82   |
| adult | 7p21.1 | 19735084 | 19748660 | 221830    | <i>TWISTNB</i>   | 0      | -3.0662 |
| adult | 7p21.1 | 19758937 | 19812404 | 256130    | <i>TMEM196</i>   | 0      | -3.0662 |
| adult | 7p21.1 | 20174278 | 20257013 | 346389    | <i>MACC1</i>     | 0      | -3.0662 |
| adult | 7p21.1 | 20370724 | 20455382 | 3696      | <i>ITGB8</i>     | 0      | -3.0662 |
| adult | 7p21.1 | 20655244 | 20796637 | 340273    | <i>ABCB5</i>     | 0.2268 | -3.0397 |
| adult | 7p21.2 | 20821893 | 20826508 | 221833    | <i>SP8</i>       | 0.2859 | -3.0132 |
| adult | 7p21.1 | 20866916 | 20867439 | 222901    | <i>RPL23P8</i>   | 0.2859 | -3.0132 |
| adult | 7p15.3 | 21467688 | 21554151 | 6671      | <i>SP4</i>       | 0.2859 | -3.0132 |
| adult | 7p21   | 21582832 | 21941186 | 8701      | <i>DNAH11</i>    | 0.2859 | -2.8798 |
| adult | 7p15.3 | 21940516 | 21985542 | 55536     | <i>CDCA7L</i>    | 0.2859 | -2.7463 |
| adult | 7p15.3 | 22157907 | 22396533 | 9771      | <i>RAPGEF5</i>   | 0.2859 | -2.7463 |
| adult | 7p15.3 | 22459062 | 22539901 | 256227    | <i>STEAP1B</i>   | 0.252  | -2.4832 |
| adult | 7p22   | 2273925  | 2281833  | 29960     | <i>FTSJ2</i>     | 0.425  | -2.044  |
| adult | 7p21   | 22766765 | 22771621 | 3569      | <i>IL6</i>       | 0.252  | -2.7718 |
| adult | 7p22   | 2281856  | 2290780  | 4521      | <i>NUDT1</i>     | 0.425  | -2.044  |
| adult | 7p15.3 | 22852250 | 22862471 | 54543     | <i>TOMM7</i>     | 0.252  | -2.7718 |
| adult | 7p15.3 | 22896231 | 22896305 | 692210    | <i>SNORD93</i>   | 0.252  | -2.7718 |
| adult | 7p22.3 | 2291404  | 2354110  | 29886     | <i>SNX8</i>      | 0.425  | -2.044  |
| adult | 7p15.3 | 22980877 | 23053770 | 84668     | <i>FAM126A</i>   | 0.252  | -2.7718 |
| adult | 7p15.3 | 23140846 | 23145322 | 100775104 | <i>KLHL7-AS1</i> | 0.252  | -2.7718 |
| adult | 7p15.3 | 23145352 | 23165669 | 55975     | <i>KLHL7</i>     | 0.252  | -2.7718 |
| adult | 7p15   | 23221445 | 23240630 | 11097     | <i>NUPL2</i>     | 0.252  | -2.7718 |
| adult | 7p15   | 23286315 | 23314729 | 10457     | <i>GPNMB</i>     | 0.252  | -2.7718 |



|       |        |          |          |           |                  |        |         |
|-------|--------|----------|----------|-----------|------------------|--------|---------|
| adult | 7p15.3 | 23338939 | 23349180 | 115416    | <i>MALSU1</i>    | 0.252  | -2.7718 |
| adult | 7p11   | 23349827 | 23509995 | 10643     | <i>IGF2BP3</i>   | 0.252  | -2.7718 |
| adult | 7p15.3 | 23530006 | 23531031 | 256355    | <i>RPS2P32</i>   | 0.252  | -2.7718 |
| adult | 7p15.3 | 23544400 | 23571660 | 29896     | <i>TRA2A</i>     | 0.252  | -2.7718 |
| adult | 7p15.3 | 23636997 | 23684327 | 90693     | <i>CCDC126</i>   | 0.252  | -2.7718 |
| adult | 7p15.3 | 23719732 | 23742269 | 340277    | <i>FAM221A</i>   | 0.252  | -2.7718 |
| adult | 7p15.3 | 23749785 | 23872130 | 56164     | <i>STK31</i>     | 0.252  | -2.7718 |
| adult | 7p22.3 | 2394473  | 2420377  | 8662      | <i>EIF3B</i>     | 0.425  | -2.044  |
| adult | 7p15.1 | 24323806 | 24331484 | 4852      | <i>NPY</i>       | 0.3051 | -2.3955 |
| adult | 7p22   | 2443194  | 2474216  | 55501     | <i>CHST12</i>    | 0.425  | -2.044  |
| adult | 7p15   | 24612964 | 24733322 | 51678     | <i>MPP6</i>      | 0.3051 | -2.3819 |
| adult | 7p15   | 24737973 | 24797083 | 1687      | <i>DFNA5</i>     | 0.3051 | -2.3683 |
| adult | 7p15   | 24836155 | 24932240 | 26031     | <i>OSBPL3</i>    | 0.3051 | -2.3683 |
| adult | 7p15.3 | 25158269 | 25164980 | 54205     | <i>CYCS</i>      | 0.3051 | -2.3683 |
| adult | 7p15.3 | 25174315 | 25219817 | 136895    | <i>C7orf31</i>   | 0.3051 | -2.3683 |
| adult | 7p15.3 | 25264190 | 25268105 | 64111     | <i>NPVF</i>      | 0.3051 | -2.3683 |
| adult | 7p22.2 | 2552162  | 2568063  | 3955      | <i>LFNG</i>      | 0.425  | -2.044  |
| adult | 7p22.3 | 2577443  | 2595392  | 221927    | <i>BRATI</i>     | 0.425  | -2.044  |
| adult | 7p22.3 | 2598605  | 2654368  | 23288     | <i>IQCE</i>      | 0.425  | -2.044  |
| adult | 7p15.2 | 25989538 | 25989606 | 406940    | <i>MIR148A</i>   | 0.3051 | -2.3683 |
| adult | 7p15.2 | 26191846 | 26226756 | 9603      | <i>NFE2L3</i>    | 0.3051 | -2.3743 |
| adult | 7p15   | 26229555 | 26240413 | 3181      | <i>HNRNPA2B1</i> | 0.3051 | -2.3743 |
| adult | 7p15.2 | 26240830 | 26253227 | 11335     | <i>CBX3</i>      | 0.3051 | -2.3743 |
| adult | 7p15.2 | 26331514 | 26413949 | 29887     | <i>SNX10</i>     | 0.3051 | -2.3743 |
| adult | 7p15.2 | 26443107 | 26535986 | 441204    | <i>LOC441204</i> | 0.3051 | -2.3743 |
| adult | 7p15.2 | 26572739 | 26578444 | 9808      | <i>KIAA0087</i>  | 0.3051 | -2.3743 |
| adult | 7p15.2 | 26677489 | 26686889 | 285941    | <i>C7orf71</i>   | 0.3051 | -2.3743 |
| adult | 7p15.2 | 26706680 | 26904362 | 8935      | <i>SKAP2</i>     | 0.3051 | -2.3743 |
| adult | 7p22   | 2671602  | 2704436  | 80727     | <i>TTYH3</i>     | 0.425  | -2.044  |
| adult | 7p15.3 | 27132613 | 27135625 | 3198      | <i>HOXA1</i>     | 0.3051 | -2.3743 |
| adult | 7p15.2 | 27135712 | 27139877 | 100506311 | <i>HOTAIRM1</i>  | 0.3051 | -2.3743 |
| adult | 7p15.2 | 27139972 | 27142394 | 3199      | <i>HOXA2</i>     | 0.3051 | -2.3743 |
| adult | 7p15.2 | 27145808 | 27159214 | 3200      | <i>HOXA3</i>     | 0.3051 | -2.3743 |

|       |              |          |          |           |                     |        |         |
|-------|--------------|----------|----------|-----------|---------------------|--------|---------|
| adult | 7p15.2       | 27168125 | 27170399 | 3201      | <i>HOXA4</i>        | 0.3051 | -2.3743 |
| adult | 7p15.2       | 27179982 | 27195547 | 100133311 | <i>HOXA-AS3</i>     | 0.3051 | -2.3743 |
| adult | 7p15.2       | 27180670 | 27183287 | 3202      | <i>HOXA5</i>        | 0.3051 | -2.3743 |
| adult | 7p15.2       | 27185201 | 27187393 | 3203      | <i>HOXA6</i>        | 0.3051 | -2.3743 |
| adult | 7p22.3       | 2719155  | 2755070  | 155185    | <i>AMZ1</i>         | 0.425  | -2.044  |
| adult | 7p15.2       | 27193337 | 27196296 | 3204      | <i>HOXA7</i>        | 0.3051 | -2.3743 |
| adult | 7p15.2       | 27202056 | 27205149 | 3205      | <i>HOXA9</i>        | 0.3051 | -2.3743 |
| adult | 7p15.2       | 27202056 | 27219880 | 100534589 | <i>HOXA10-HOXA9</i> | 0.3051 | -2.3743 |
| adult | 7p15.2       | 27209098 | 27209182 | 442920    | <i>MIR196B</i>      | 0.3051 | -2.3743 |
| adult | 7p15.2       | 27210209 | 27213955 | 3206      | <i>HOXA10</i>       | 0.3051 | -2.3743 |
| adult | 7p15.2       | 27220775 | 27224835 | 3207      | <i>HOXA11</i>       | 0.3051 | -2.3743 |
| adult | 7p15.2       | 27225026 | 27228912 | 221883    | <i>HOXA11-AS</i>    | 0.3051 | -2.3743 |
| adult | 7p15.2       | 27236498 | 27239725 | 3209      | <i>HOXA13</i>       | 0.3051 | -2.3743 |
| adult | 7p15.2       | 27240039 | 27246878 | 100316868 | <i>HOTTIP</i>       | 0.3051 | -2.3743 |
| adult | 7p15.2       | 27282163 | 27287438 | 2128      | <i>EVX1</i>         | 0.3051 | -2.3743 |
| adult | 7p15.2       | 27565058 | 27702620 | 11112     | <i>HIBADH</i>       | 0.3051 | -2.3743 |
| adult | 7p22.2       | 2767740  | 2883959  | 2768      | <i>GNA12</i>        | 0.425  | -2.044  |
| adult | 7p15         | 27778991 | 27869386 | 8887      | <i>TAX1BP1</i>      | 0.3051 | -2.3743 |
| adult | 7p15.2-p15.1 | 27870192 | 28220437 | 221895    | <i>JAZF1</i>        | 0.3051 | -2.3743 |
| adult | 7p15.1       | 28220075 | 28280996 | 100128081 | <i>JAZF1-AS1</i>    | 0.3051 | -2.3743 |
| adult | 7p15.1       | 28338939 | 28865511 | 9586      | <i>CREB5</i>        | 0.3051 | -2.3753 |
| adult | 7p14.3       | 28992973 | 28998029 | 9865      | <i>TRIL</i>         | 0.3051 | -2.3762 |
| adult | 7p15.1       | 29035246 | 29186153 | 54504     | <i>CPVL</i>         | 0.3051 | -2.3762 |
| adult | 7p15.3       | 29234120 | 29553951 | 1124      | <i>CHN2</i>         | 0.3051 | -2.3762 |
| adult | 7p22         | 2945709  | 3083579  | 84433     | <i>CARD11</i>       | 0.425  | -2.044  |
| adult | 7p14.3       | 29603426 | 29606911 | 222171    | <i>PRR15</i>        | 0.3051 | -2.3762 |
| adult | 7p14.3       | 29685537 | 29724754 | 646762    | <i>LOC646762</i>    | 0.3051 | -2.3753 |
| adult | 7p15.1       | 29724769 | 29727859 | 442524    | <i>DPY19L2P3</i>    | 0.3051 | -2.3753 |
| adult | 7p14.3       | 29846169 | 29956682 | 644150    | <i>WIPF3</i>        | 0.3051 | -2.3753 |
| adult | 7p14.3       | 29959718 | 30029425 | 9805      | <i>SCRNI</i>        | 0.3051 | -2.3753 |
| adult | 7p14.3       | 30050198 | 30066417 | 55033     | <i>FKBP14</i>       | 0.3051 | -2.3753 |
| adult | 7p14.3       | 30067976 | 30124278 | 84725     | <i>PLEKHA8</i>      | 0.3051 | -2.3753 |
| adult | 7p14.3       | 30323922 | 30407308 | 223082    | <i>ZNRF2</i>        | 0.3051 | -2.3753 |

|       |              |          |          |           |                      |        |         |
|-------|--------------|----------|----------|-----------|----------------------|--------|---------|
| adult | 7p14.3       | 30329409 | 30329506 | 693133    | <i>MIR550A1</i>      | 0.3051 | -2.3753 |
| adult | 7p14.3       | 30409665 | 30412410 | 222161    | <i>DKFZP586I1420</i> | 0.3051 | -2.3753 |
| adult | 7p14.3       | 30464142 | 30518393 | 10392     | <i>NOD1</i>          | 0.3051 | -2.3753 |
| adult | 7p15-p14     | 30536236 | 30544457 | 79017     | <i>GGCT</i>          | 0.3051 | -2.3753 |
| adult | 7p15.1       | 30587972 | 30617395 | 401320    | <i>LOC401320</i>     | 0.3051 | -2.3753 |
| adult | 7p15         | 30634508 | 30673648 | 2617      | <i>GARS</i>          | 0.3051 | -2.3753 |
| adult | 7p14.3       | 30691558 | 30722141 | 1395      | <i>CRHR2</i>         | 0.3051 | -2.3753 |
| adult | 7p14.3       | 30791750 | 30797218 | 11185     | <i>INMT</i>          | 0.3051 | -2.3753 |
| adult | 7p14         | 30951414 | 30965131 | 358       | <i>AQP1</i>          | 0.3051 | -2.3753 |
| adult | 7p14         | 31003635 | 31019146 | 2692      | <i>GHRHR</i>         | 0.3051 | -2.3753 |
| adult | 7p14         | 31092075 | 31151093 | 117       | <i>ADCYAP1R1</i>     | 0.3051 | -2.3753 |
| adult | 7p14.3       | 31377074 | 31380538 | 63974     | <i>NEUROD6</i>       | 0.3051 | -2.0015 |
| adult | 7p14.3       | 31553684 | 31693303 | 223075    | <i>CCDC129</i>       | 0.3051 | -2.4505 |
| adult | 7p15         | 31726630 | 31748069 | 10842     | <i>PPP1R17</i>       | 0.3051 | -2.4993 |
| adult | 7p14.3       | 31790792 | 32110474 | 5137      | <i>PDE1C</i>         | 0.3051 | -2.4993 |
| adult | 7p14.3       | 32496509 | 32498106 | 100130673 | <i>LOC100130673</i>  | 0.3051 | -2.4697 |
| adult | 7p14.3       | 32524944 | 32530023 | 23658     | <i>LSM5</i>          | 0.3051 | -2.4697 |
| adult | 7p14.3       | 32535037 | 32628353 | 23080     | <i>AVL9</i>          | 0.3051 | -2.4697 |
| adult | 7p14.3       | 32620552 | 32758780 | 100129460 | <i>DPY19L1P1</i>     | 0.3051 | -2.1971 |
| adult | 7p14.3       | 32767561 | 32769595 | 441208    | <i>ZNRF2P1</i>       | 0.3051 | -2.1971 |
| adult | 7p14.3       | 32772592 | 32772689 | 693134    | <i>MIR550A2</i>      | 0.3051 | -2.1971 |
| adult | 7p14.3       | 32907777 | 32931468 | 25948     | <i>KBTBD2</i>        | 0      | -2.2178 |
| adult | 7p14.3       | 32956426 | 32982782 | 441212    | <i>RP9P</i>          | 0      | -2.2178 |
| adult | 7p11.1       | 32997015 | 33046543 | 11328     | <i>FKBP9</i>         | 0      | -2.2178 |
| adult | 7p14.3       | 33053724 | 33080777 | 51251     | <i>NT5C3A</i>        | 0      | -2.2178 |
| adult | 7p14.3       | 33134409 | 33149002 | 6100      | <i>RP9</i>           | 0      | -2.2178 |
| adult | 7p14         | 33169151 | 33645680 | 27241     | <i>BBS9</i>          | 0.2172 | -2.4853 |
| adult | 7p22.2       | 3341079  | 4308631  | 221935    | <i>SDK1</i>          | 0.3358 | -2.0693 |
| adult | 7p14.3       | 33944522 | 34195484 | 168667    | <i>BMPER</i>         | 0.2172 | -2.4843 |
| adult | 7p14.3       | 34386123 | 34797884 | 404744    | <i>NPSR1-ASI</i>     | 0.2172 | -2.4843 |
| adult | 7p14.3       | 34697896 | 34889590 | 387129    | <i>NPSR1</i>         | 0.2172 | -2.4843 |
| adult | 7p14.3-p14.2 | 34968492 | 35077653 | 23333     | <i>DPY19L1</i>       | 0.2172 | -2.0721 |
| adult | 7p14.2       | 35120898 | 35225774 | 554236    | <i>DPY19L2P1</i>     | 0.2172 | -2.4278 |

|       |          |          |          |           |                   |        |         |
|-------|----------|----------|----------|-----------|-------------------|--------|---------|
| adult | 7p14.3   | 35242041 | 35293711 | 57057     | <i>TBX20</i>      | 0.2172 | -2.4278 |
| adult | 7p14.2   | 35353465 | 35416086 | 401324    | <i>LOC401324</i>  | 0.2172 | -2.4278 |
| adult | 7p14.2   | 35672269 | 35734772 | 64224     | <i>HERPUD2</i>    | 0.2172 | -2.4278 |
| adult | 7p14.2   | 35840595 | 35946715 | 989       | <i>7-Sep</i>      | 0.2172 | -2.4278 |
| adult | 7p14.2   | 36192835 | 36341152 | 80820     | <i>EEPD1</i>      | 0.2172 | -2.4278 |
| adult | 7p14.2   | 36363758 | 36406782 | 23366     | <i>KLAA0895</i>   | 0.2172 | -2.4278 |
| adult | 7p15-p14 | 36429411 | 36493401 | 54443     | <i>ANLN</i>       | 0.2172 | -2.4278 |
| adult | 7p14.2   | 36552548 | 36764154 | 313       | <i>AOAH</i>       | 0.2172 | -2.4421 |
| adult | 7p14.1   | 36892510 | 37024717 | 9844      | <i>ELMO1</i>      | 0.2172 | -2.4564 |
| adult | 7p14.2   | 36958961 | 36959037 | 100302113 | <i>MIR1200</i>    | 0.2172 | -2.4564 |
| adult | 7p14.1   | 37779995 | 37780913 | 353345    | <i>GPR141</i>     | 0.2172 | -2.4564 |
| adult | 7p14.1   | 37888198 | 37940002 | 51314     | <i>NME8</i>       | 0.2172 | -2.4564 |
| adult | 7p14.1   | 37945534 | 37956525 | 6424      | <i>SFRP4</i>      | 0.2172 | -2.4564 |
| adult | 7p14.1   | 37960162 | 37991542 | 54749     | <i>EPDR1</i>      | 0.2172 | -2.4564 |
| adult | 7p14-p13 | 38217807 | 38270272 | 83930     | <i>STARD3NL</i>   | 0.2172 | -2.4564 |
| adult | 7p14-p13 | 38423296 | 38671167 | 273       | <i>AMPH</i>       | 0.2172 | -2.58   |
| adult | 7p14.1   | 38724945 | 38726689 | 340286    | <i>FAM183B</i>    | 0.2172 | -2.58   |
| adult | 7p14-p13 | 38763542 | 38948800 | 27072     | <i>VPS41</i>      | 0.2172 | -2.58   |
| adult | 7p14.1   | 39017608 | 39504390 | 11281     | <i>POU6F2</i>     | 0.2172 | -2.7818 |
| adult | 7p14.1   | 39444197 | 39445945 | 100861520 | <i>POU6F2-AS1</i> | 0.2172 | -2.7818 |
| adult | 7p14.1   | 39605974 | 39612480 | 57002     | <i>YAE1D1</i>     | 0.2172 | -2.58   |
| adult | 7p15-p13 | 39663151 | 39747723 | 5898      | <i>RALA</i>       | 0.2172 | -2.58   |
| adult | 7p14.1   | 39773166 | 39834222 | 349114    | <i>LINC00265</i>  | 0.2172 | -2.5561 |
| adult | 7p13     | 39989958 | 40136733 | 8621      | <i>CDK13</i>      | 0.2172 | -2.5095 |
| adult | 7p14.1   | 40172341 | 40174251 | 136647    | <i>MPLKIP</i>     | 0.2172 | -2.5095 |
| adult | 7p15-p13 | 41728600 | 41742706 | 3624      | <i>INHBA</i>      | 0.2172 | -2.5095 |
| adult | 7p14.1   | 41733513 | 41818976 | 285954    | <i>INHBA-AS1</i>  | 0.2172 | -2.5095 |
| adult | 7p22     | 419390   | 422845   | 442497    | <i>LOC442497</i>  | 0      | -1.82   |
| adult | 7p13     | 42000547 | 42276618 | 2737      | <i>GLI3</i>       | 0.2172 | -2.5095 |
| adult | 7p14.1   | 42948871 | 42951689 | 79020     | <i>C7orf25</i>    | 0.2172 | -2.5095 |
| adult | 7p13     | 42956461 | 42971805 | 5683      | <i>PSMA2</i>      | 0.2172 | -2.5095 |
| adult | 7p14     | 42971938 | 42977453 | 64983     | <i>MRPL32</i>     | 0.2172 | -2.5095 |
| adult | 7p13     | 43152197 | 43602938 | 23072     | <i>HECW1</i>      | 0.2172 | -2.5095 |

|       |              |          |          |           |                     |        |         |
|-------|--------------|----------|----------|-----------|---------------------|--------|---------|
| adult | 7p13         | 43622691 | 43666978 | 9263      | <i>STK17A</i>       | 0.2172 | -2.5095 |
| adult | 7p13         | 43670750 | 43769140 | 55744     | <i>COA1</i>         | 0.2172 | -2.5095 |
| adult | 7p13         | 43798271 | 43846941 | 644       | <i>BLVRA</i>        | 0.2172 | -2.5095 |
| adult | 7p14         | 43906156 | 43909145 | 64951     | <i>MRPS24</i>       | 0.2172 | -2.5095 |
| adult | 7p13         | 43906156 | 43946231 | 100534592 | <i>URGCP-MRPS24</i> | 0.2172 | -2.5095 |
| adult | 7p13         | 43915492 | 43946668 | 55665     | <i>URGCP</i>        | 0.2172 | -2.5095 |
| adult | 7p13         | 43966034 | 43995735 | 51619     | <i>UBE2D4</i>       | 0.2172 | -2.5095 |
| adult | 7p13         | 43980493 | 44058793 | 84820     | <i>POLR2J4</i>      | 0.2172 | -2.5095 |
| adult | 7p13         | 44040488 | 44049723 | 285955    | <i>SPDYE1</i>       | 0.2172 | -2.1529 |
| adult | 7p13         | 44078647 | 44082082 | 255031    | <i>LINC00957</i>    | 0.2172 | -2.1529 |
| adult | 7p13         | 44084238 | 44101315 | 28988     | <i>DBNL</i>         | 0.2172 | -2.4287 |
| adult | 7p13-p12     | 44102325 | 44105186 | 5224      | <i>PGAM2</i>        | 0.2172 | -2.4287 |
| adult | 7p13         | 44111660 | 44122139 | 27434     | <i>POLM</i>         | 0.2172 | -2.4287 |
| adult | 7p13         | 44143959 | 44154164 | 165       | <i>AEBP1</i>        | 0.2172 | -2.4287 |
| adult | 7p13         | 44154278 | 44163107 | 5425      | <i>POLD2</i>        | 0.2172 | -2.4287 |
| adult | 7p21-p11.2   | 44178462 | 44180916 | 58498     | <i>MYL7</i>         | 0.2172 | -2.4287 |
| adult | 7p15.3-p15.1 | 44183869 | 44198887 | 2645      | <i>GCK</i>          | 0.2172 | -2.4287 |
| adult | 7p15.1       | 44240577 | 44253893 | 10652     | <i>YKT6</i>         | 0.2172 | -2.4287 |
| adult | 7p14.3-p14.1 | 44256748 | 44365230 | 816       | <i>CAMK2B</i>       | 0.2172 | -2.3852 |
| adult | 7p13-p12     | 44421964 | 44530385 | 23386     | <i>NUDCD3</i>       | 0.2172 | -2.3416 |
| adult | 7p13         | 44552134 | 44580914 | 29881     | <i>NPCIL1</i>       | 0.2172 | -2.3416 |
| adult | 7p13         | 44605015 | 44614137 | 54606     | <i>DDX56</i>        | 0.2172 | -2.3416 |
| adult | 7p13         | 44617493 | 44621894 | 222068    | <i>TMED4</i>        | 0.2172 | -2.3416 |
| adult | 7p14-p13     | 44646120 | 44716195 | 4967      | <i>OGDH</i>         | 0.2172 | -2.3416 |
| adult | 7p13         | 44788529 | 44809479 | 83637     | <i>ZMIZ2</i>        | 0.2172 | -2.3416 |
| adult | 7p13         | 44836234 | 44842722 | 5478      | <i>PPIA</i>         | 0.2172 | -2.3416 |
| adult | 7p13         | 44866487 | 44887725 | 94239     | <i>H2AFV</i>        | 0.2172 | -2.3416 |
| adult | 7p13         | 44915891 | 44924984 | 5814      | <i>PURB</i>         | 0.2172 | -2.3416 |
| adult | 7p13         | 45002259 | 45018704 | 64005     | <i>MYO1G</i>        | 0.2172 | -2.3416 |
| adult | 7p13         | 45022626 | 45026259 | 285958    | <i>SNHG15</i>       | 0.2172 | -2.3416 |
| adult | 7p13         | 45024976 | 45025109 | 677798    | <i>SNORA9</i>       | 0.2172 | -2.3416 |
| adult | 7p13         | 45039344 | 45116069 | 83605     | <i>CCM2</i>         | 0.2172 | -2.3416 |
| adult | 7p13         | 45120035 | 45128493 | 23148     | <i>NACAD</i>        | 0.2172 | -2.3416 |

|       |          |          |          |           |                  |        |         |
|-------|----------|----------|----------|-----------|------------------|--------|---------|
| adult | 7p13     | 45139698 | 45151346 | 9238      | <i>TBRG4</i>     | 0.2172 | -2.3416 |
| adult | 7p13     | 45144504 | 45144641 | 677796    | <i>SNORA5C</i>   | 0.2172 | -2.3416 |
| adult | 7p13     | 45145566 | 45145698 | 677795    | <i>SNORA5B</i>   | 0.2172 | -2.3416 |
| adult | 7p13-p12 | 45197366 | 45223850 | 10268     | <i>RAMP3</i>     | 0.2172 | -2.3416 |
| adult | 7p12.3   | 45614124 | 45762714 | 107       | <i>ADCY1</i>     | 0.2172 | -2.3416 |
| adult | 7p12.3   | 45763385 | 45808617 | 641977    | <i>SEPT7P2</i>   | 0.2172 | -2.3416 |
| adult | 7p12.3   | 45927958 | 45933267 | 3484      | <i>IGFBP1</i>    | 0.2172 | -2.4137 |
| adult | 7p12.3   | 45951843 | 45960871 | 3486      | <i>IGFBP3</i>    | 0.2172 | -2.4137 |
| adult | 7p22.1   | 4721929  | 4811074  | 221937    | <i>FOXK1</i>     | 0.2466 | -2.2983 |
| adult | 7p12.3   | 47314751 | 47621742 | 64759     | <i>TNS3</i>      | 0.2172 | -2.3863 |
| adult | 7p12.3   | 47694841 | 47701246 | 401335    | <i>C7orf65</i>   | 0.2172 | -2.3863 |
| adult | 7p12.3   | 47801073 | 47806370 | 84847     | <i>LINC00525</i> | 0.2172 | -2.4135 |
| adult | 7p12.3   | 47814249 | 47988071 | 168507    | <i>PKDIL1</i>    | 0.2172 | -2.4135 |
| adult | 7p12.3   | 47834888 | 47859444 | 80099     | <i>C7orf69</i>   | 0.2172 | -2.4135 |
| adult | 7p13-p12 | 48002884 | 48019222 | 3364      | <i>HUS1</i>      | 0.2172 | -2.4135 |
| adult | 7p12.3   | 48026745 | 48068716 | 256979    | <i>SUN3</i>      | 0.2172 | -2.4135 |
| adult | 7p12.3   | 48075107 | 48100894 | 136288    | <i>C7orf57</i>   | 0.2172 | -2.4135 |
| adult | 7p12.3   | 48128808 | 48148330 | 7378      | <i>UPP1</i>      | 0.2172 | -2.4135 |
| adult | 7p22.2   | 4815261  | 4834026  | 9907      | <i>AP5Z1</i>     | 0.2466 | -2.2983 |
| adult | 7p12.3   | 48211056 | 48687091 | 154664    | <i>ABCA13</i>    | 0.2172 | -2.4274 |
| adult | 7p22.1   | 4838739  | 4923335  | 55698     | <i>RADIL</i>     | 0.2466 | -2.2983 |
| adult | 7p12.3   | 48964156 | 48967049 | 168448    | <i>CDC14C</i>    | 0.2172 | -2.4413 |
| adult | 7p22.1   | 4897368  | 4901625  | 56903     | <i>PAPOLB</i>    | 0.2466 | -2.2983 |
| adult | 7p22.1   | 4931875  | 4998844  | 221938    | <i>MMD2</i>      | 0.2466 | -2.2983 |
| adult | 7p12.2   | 49813256 | 49952138 | 375567    | <i>VWC2</i>      | 0.2172 | -2.5524 |
| adult | 7p14.3   | 49977023 | 50132860 | 11055     | <i>ZPBP</i>      | 0.2172 | -2.5524 |
| adult | 7p12.2   | 50135681 | 50198852 | 100130988 | <i>C7orf72</i>   | 0.2172 | -2.5524 |
| adult | 7p22.1   | 5013615  | 5037800  | 441191    | <i>RNF216P1</i>  | 0.2466 | -2.2983 |
| adult | 7p12.2   | 50344264 | 50472798 | 10320     | <i>IKZF1</i>     | 0.2172 | -2.4597 |
| adult | 7p12.1   | 50511826 | 50518088 | 63979     | <i>FIGNL1</i>    | 0.2172 | -2.4214 |
| adult | 7p12.2   | 50526133 | 50628768 | 1644      | <i>DDC</i>       | 0.2172 | -2.4214 |
| adult | 7p12.2   | 50657759 | 50772998 | 2887      | <i>GRB10</i>     | 0.2172 | -2.4214 |
| adult | 7p22.1   | 5085451  | 5109119  | 57786     | <i>RBAK</i>      | 0.2466 | -2.2983 |

|       |               |          |          |           |                     |        |         |
|-------|---------------|----------|----------|-----------|---------------------|--------|---------|
| adult | 7p12.1        | 51083908 | 51384515 | 23242     | <i>COBL</i>         | 0.2172 | -2.4214 |
| adult | 7p22.1        | 5111690  | 5112854  | 389458    | <i>RBAKDN</i>       | 0.2466 | -2.2983 |
| adult | 7p22.1        | 5160940  | 5184177  | 645700    | <i>ZNF890P</i>      | 0.2466 | -2.2983 |
| adult | 7p22.1        | 5229834  | 5273486  | 26100     | <i>WIP12</i>        | 0.2466 | -2.2983 |
| adult | 7p12.1        | 53103348 | 53104618 | 285877    | <i>POM121L12</i>    | 0      | -2.9565 |
| adult | 7p22.1        | 5322560  | 5343704  | 222962    | <i>SLC29A4</i>      | 0.2466 | -2.2983 |
| adult | 7p22.1        | 5346422  | 5463177  | 84629     | <i>TNRC18</i>       | 0.2466 | -2.2983 |
| adult | 7p22          | 536896   | 559481   | 5154      | <i>PDGFA</i>        | 0      | -1.82   |
| adult | 7p11.2        | 54268916 | 54270114 | 3262      | <i>HPVC1</i>        | 0      | -2.9565 |
| adult | 7p11.2        | 54610017 | 54638773 | 222008    | <i>VSTM2A</i>       | 0      | -2.2525 |
| adult | 7p11.2        | 54819939 | 54826939 | 23480     | <i>SEC61G</i>       | 0      | -2.2525 |
| adult | 7p12          | 55086724 | 55224644 | 1956      | <i>EGFR</i>         | 0      | -2.2525 |
| adult | 7p22.2        | 5515427  | 5553399  | 80028     | <i>FBXL18</i>       | 0.2466 | -2.2983 |
| adult | 7p22.1        | 5535449  | 5535548  | 693174    | <i>MIR589</i>       | 0.2466 | -2.2983 |
| adult | 7q31.1-q31.33 | 55433140 | 55501435 | 55915     | <i>LANCL2</i>       | 0      | -2.1838 |
| adult | 7p11.2        | 55538305 | 55640200 | 81552     | <i>VOPPI</i>        | 0      | -2.1838 |
| adult | 7p22          | 5566778  | 5570232  | 60        | <i>ACTB</i>         | 0.2466 | -2.2983 |
| adult | 7p22.3        | 560027   | 564869   | 441307    | <i>FLJ44511</i>     | 0      | -1.82   |
| adult | 7p22          | 5632435  | 5646287  | 6624      | <i>FSCN1</i>        | 0.2466 | -2.2983 |
| adult | 7p22.1        | 5659671  | 5821361  | 54476     | <i>RNF216</i>       | 0.2466 | -2.2983 |
| adult | 7p22.1        | 5862790  | 5894066  | 401303    | <i>ZNF815P</i>      | 0.2466 | -2.2983 |
| adult | 7p22          | 588833   | 752161   | 5575      | <i>PRKAR1B</i>      | 0      | -1.82   |
| adult | 7p22.1        | 5920428  | 5925994  | 654231    | <i>OCM</i>          | 0.2466 | -2.2983 |
| adult | 7p22.1        | 5938340  | 5965603  | 51622     | <i>CCZI</i>         | 0.2466 | -2.2983 |
| adult | 7p22.1        | 5965776  | 6010314  | 728194    | <i>RSPH10B2</i>     | 0.2466 | -2.2983 |
| adult | 7p22.2        | 6012869  | 6048737  | 5395      | <i>PMS2</i>         | 0.2466 | -2.2983 |
| adult | 7p22          | 6048881  | 6063465  | 7965      | <i>AIMP2</i>        | 0.2466 | -2.2983 |
| adult | 7p22          | 6061877  | 6098860  | 27102     | <i>EIF2AK1</i>      | 0.2466 | -2.2983 |
| adult | 7p22          | 6071006  | 6076183  | 100310846 | <i>ANKRD61</i>      | 0.2466 | -2.2983 |
| adult | 7p22.1        | 6144549  | 6201195  | 84132     | <i>USP42</i>        | 0.2466 | -2.2983 |
| adult | 7p22.1        | 6201411  | 6312242  | 9265      | <i>CYTH3</i>        | 0.2466 | -2.2983 |
| adult | 7q11.21       | 62751669 | 62764434 | 643955    | <i>ZNF733P</i>      | 0.2525 | -1.4205 |
| adult | 7q11.21       | 62809447 | 62812152 | 100287834 | <i>LOC100287834</i> | 0.2525 | -1.4205 |

|       |         |          |          |           |                     |        |         |
|-------|---------|----------|----------|-----------|---------------------|--------|---------|
| adult | 7q11.21 | 63505820 | 63538927 | 442319    | <i>ZNF727</i>       | 0.2525 | -1.4321 |
| adult | 7q11.21 | 63667580 | 63680668 | 730291    | <i>ZNF735</i>       | 0.2525 | -1.4321 |
| adult | 7q11.21 | 63688851 | 63727309 | 168417    | <i>ZNF679</i>       | 0.2525 | -1.4321 |
| adult | 7p22.1  | 6369039  | 6388590  | 84792     | <i>FAM220A</i>      | 0.2466 | -2.2983 |
| adult | 7q11.21 | 63774250 | 63817012 | 728927    | <i>ZNF736</i>       | 0.2525 | -1.4321 |
| adult | 7q11.21 | 63980254 | 64023505 | 340252    | <i>ZNF680</i>       | 0.2525 | -1.4321 |
| adult | 7q11.21 | 64035072 | 64078967 | 100128885 | <i>LOC100128885</i> | 0.2525 | -1.4321 |
| adult | 7q11.21 | 64042987 | 64044129 | 641746    | <i>LOC641746</i>    | 0.2525 | -1.4321 |
| adult | 7q11.2  | 64126460 | 64171960 | 51427     | <i>ZNF107</i>       | 0.2525 | -1.4321 |
| adult | 7p22    | 6414125  | 6443598  | 5879      | <i>RAC1</i>         | 0.2466 | -2.2983 |
| adult | 7q11.21 | 64254765 | 64294059 | 7697      | <i>ZNF138</i>       | 0.2525 | -1.4321 |
| adult | 7q11.21 | 64363619 | 64391955 | 10793     | <i>ZNF273</i>       | 0.2525 | -1.5927 |
| adult | 7q11.21 | 64434829 | 64451414 | 51351     | <i>ZNF117</i>       | 0.2525 | -1.5927 |
| adult | 7q11.2  | 64450732 | 64467124 | 2086      | <i>ERV3-1</i>       | 0.2525 | -1.5927 |
| adult | 7p22.1  | 6448746  | 6487643  | 221955    | <i>DAGLB</i>        | 0.2466 | -2.2983 |
| adult | 7q11.21 | 64498731 | 64535091 | 643180    | <i>CCT6P3</i>       | 0.2525 | -1.5927 |
| adult | 7q11.21 | 64838711 | 64866048 | 168374    | <i>ZNF92</i>        | 0.2559 | -1.5658 |
| adult | 7p22.1  | 6500711  | 6523849  | 11014     | <i>KDELR2</i>       | 0.2466 | -2.2983 |
| adult | 7q11.21 | 65111923 | 65235797 | 441242    | <i>LOC441242</i>    | 0.2559 | -1.7764 |
| adult | 7q11.21 | 65216091 | 65228662 | 643253    | <i>CCT6P1</i>       | 0.2559 | -1.7764 |
| adult | 7q11.21 | 65220512 | 65220646 | 677807    | <i>SNORA22</i>      | 0.2559 | -1.7764 |
| adult | 7q11.21 | 65338256 | 65424550 | 154807    | <i>VKORC1L1</i>     | 0.2559 | -1.7764 |
| adult | 7p22.1  | 6536408  | 6591067  | 392862    | <i>GRID2IP</i>      | 0.2466 | -2.2983 |
| adult | 7q21.11 | 65425672 | 65447301 | 2990      | <i>GUSB</i>         | 0.2559 | -1.7764 |
| adult | 7q11.21 | 65540775 | 65558329 | 435       | <i>ASL</i>          | 0.2559 | -1.7764 |
| adult | 7q11.21 | 65579804 | 65619553 | 27297     | <i>CRCP</i>         | 0.2559 | -1.7764 |
| adult | 7q11.21 | 65670258 | 65825438 | 8460      | <i>TPST1</i>        | 0.2559 | -1.7764 |
| adult | 7q11.21 | 65841030 | 65865395 | 285908    | <i>LINC00174</i>    | 0.2559 | -1.7764 |
| adult | 7q11.21 | 66093867 | 66108216 | 154881    | <i>KCTD7</i>        | 0.2559 | -1.7764 |
| adult | 7p22.1  | 6617064  | 6628610  | 55146     | <i>ZDHHC4</i>       | 0.2466 | -2.2983 |
| adult | 7q11.21 | 66205642 | 66276448 | 27342     | <i>RABGEF1</i>      | 0.2559 | -1.7764 |
| adult | 7q11.21 | 66274979 | 66309813 | 729156    | <i>GTF2IRD1P1</i>   | 0.2559 | -1.7764 |
| adult | 7p22.1  | 6629651  | 6648357  | 79034     | <i>C7orf26</i>      | 0.2466 | -2.2983 |



|       |              |          |          |           |                     |        |         |
|-------|--------------|----------|----------|-----------|---------------------|--------|---------|
| adult | 7q11.21      | 66386202 | 66423538 | 55069     | <i>TMEM248</i>      | 0.2559 | -1.7764 |
| adult | 7q11.21      | 66452689 | 66460588 | 51119     | <i>SBDS</i>         | 0.2559 | -1.7764 |
| adult | 7q11.21      | 66461791 | 66704507 | 55253     | <i>TYWI</i>         | 0.2559 | -1.7764 |
| adult | 7p22.1       | 6655526  | 6663921  | 54753     | <i>ZNF853</i>       | 0.2466 | -2.2983 |
| adult | 7q11.22      | 66741117 | 66767429 | 5382      | <i>PMS2P4</i>       | 0.2559 | -1.7764 |
| adult | 7p11.2-q11.2 | 66767624 | 66786513 | 64940     | <i>STAG3L4</i>      | 0.2559 | -1.7764 |
| adult | 7p22.1       | 6728063  | 6746566  | 7559      | <i>ZNF12</i>        | 0.2466 | -2.8743 |
| adult | 7p22.1       | 6774935  | 6791232  | 441194    | <i>PMS2CL</i>       | 0.2466 | -2.8743 |
| adult | 7p22.1       | 6838565  | 6865926  | 221960    | <i>CCZ1B</i>        | 0.2466 | -2.8743 |
| adult | 7q11.22      | 69063904 | 69755772 | 26053     | <i>AUTS2</i>        | 0.2559 | -1.7764 |
| adult | 7q11.23      | 70597522 | 71178586 | 64409     | <i>WBSCR17</i>      | 0.2559 | -1.8061 |
| adult | 7p22.1       | 7115400  | 7136417  | 100131257 | <i>LOC100131257</i> | 0.2466 | -2.8743 |
| adult | 7q11         | 71244475 | 71802208 | 83698     | <i>CALN1</i>        | 0.2559 | -1.8061 |
| adult | 7q11.23      | 72039491 | 72298813 | 441250    | <i>TYW1B</i>        | 0.2559 | -1.5499 |
| adult | 7p21.3       | 7222245  | 7288280  | 56913     | <i>C1GALT1</i>      | 0.2466 | -2.8743 |
| adult | 7q11.23      | 72299951 | 72304586 | 155370    | <i>SBDSP1</i>       | 0.2559 | -1.5043 |
| adult | 7q11.23      | 72333320 | 72339656 | 441251    | <i>SPDYE7P</i>      | 0.2559 | -1.5043 |
| adult | 7q11.23      | 72349905 | 72421979 | 9883      | <i>POM121</i>       | 0.2559 | -1.5043 |
| adult | 7q11.23      | 72418831 | 72425302 | 260294    | <i>NSUN5P2</i>      | 0.2559 | -1.5043 |
| adult | 7q11.23      | 72440164 | 72443674 | 541473    | <i>LOC541473</i>    | 0.2559 | -1.5043 |
| adult | 7q11.23      | 72467817 | 72476466 | 442578    | <i>STAG3L3</i>      | 0.2559 | -1.5043 |
| adult | 7q11.23      | 72476618 | 72520245 | 5383      | <i>PMS2P5</i>       | 0.2559 | -1.5043 |
| adult | 7q11.23      | 72490259 | 72500309 | 728524    | <i>SPDYE8P</i>      | 0.2559 | -1.5043 |
| adult | 7q11.23      | 72569011 | 72621336 | 100093631 | <i>LOC100093631</i> | 0.2559 | -1.5043 |
| adult | 7q11.23      | 72634673 | 72649979 | 654816    | <i>NCF1B</i>        | 0.2559 | -1.5043 |
| adult | 7q11.23      | 72716512 | 72722864 | 55695     | <i>NSUN5</i>        | 0.2559 | -1.5043 |
| adult | 7q11.23      | 72726531 | 72742085 | 135892    | <i>TRIM50</i>       | 0.2559 | -1.5043 |
| adult | 7q11.23      | 72742154 | 72772646 | 8468      | <i>FKBP6</i>        | 0.2559 | -1.5043 |
| adult | 7q11.23      | 72848108 | 72850450 | 8326      | <i>FZD9</i>         | 0.2559 | -1.5043 |
| adult | 7q11.23      | 72854727 | 72936615 | 9031      | <i>BAZ1B</i>        | 0.2559 | -1.5043 |
| adult | 7q11.23      | 72950682 | 72971602 | 9275      | <i>BCL7B</i>        | 0.2559 | -1.5043 |
| adult | 7q11.23      | 72983276 | 72993013 | 26608     | <i>TBL2</i>         | 0.2559 | -1.5043 |
| adult | 7q11.23      | 73007523 | 73038870 | 51085     | <i>MLXIPL</i>       | 0.2559 | -1.5043 |

|       |         |          |          |           |                  |        |         |
|-------|---------|----------|----------|-----------|------------------|--------|---------|
| adult | 7q11.23 | 73082173 | 73086440 | 155382    | <i>VPS37D</i>    | 0.2559 | -1.5043 |
| adult | 7q11.23 | 73095247 | 73097781 | 84277     | <i>DNAJC30</i>   | 0.2559 | -1.5043 |
| adult | 7q11.23 | 73097897 | 73112551 | 114049    | <i>WBSCR22</i>   | 0.2559 | -1.5043 |
| adult | 7q11.23 | 73113534 | 73134017 | 6804      | <i>STX1A</i>     | 0.2559 | -1.5043 |
| adult | 7q11.23 | 73150424 | 73153184 | 83451     | <i>ABHD11</i>    | 0.2559 | -1.5043 |
| adult | 7q11.23 | 73183326 | 73184600 | 1365      | <i>CLDN3</i>     | 0.2559 | -1.5043 |
| adult | 7q11.23 | 73245192 | 73247023 | 1364      | <i>CLDN4</i>     | 0.2559 | -1.5043 |
| adult | 7q11.23 | 73248920 | 73256855 | 155368    | <i>WBSCR27</i>   | 0.2559 | -1.5043 |
| adult | 7q11.23 | 73275488 | 73280223 | 135886    | <i>WBSCR28</i>   | 0.2559 | -1.5043 |
| adult | 7q11.23 | 73442118 | 73484236 | 2006      | <i>ELN</i>       | 0.2559 | -1.5043 |
| adult | 7q11.23 | 73498106 | 73536855 | 3984      | <i>LIMK1</i>     | 0.2559 | -1.5043 |
| adult | 7q11.23 | 73588705 | 73611429 | 7458      | <i>EIF4H</i>     | 0.2559 | -1.5043 |
| adult | 7q11.23 | 73605527 | 73605624 | 693175    | <i>MIR590</i>    | 0.2559 | -1.5043 |
| adult | 7q11.23 | 73624086 | 73644164 | 7462      | <i>LAT2</i>      | 0.2559 | -1.5043 |
| adult | 7q11.23 | 73645831 | 73668788 | 5982      | <i>RFC2</i>      | 0.2559 | -1.5043 |
| adult | 7q11.23 | 73703804 | 73820273 | 7461      | <i>CLIP2</i>     | 0.2559 | -1.5043 |
| adult | 7q11.23 | 73868119 | 74016920 | 9569      | <i>GTF2IRD1</i>  | 0.2559 | -1.5318 |
| adult | 7p21.3  | 7398243  | 7575460  | 340267    | <i>COL28A1</i>   | 0.2466 | -2.8743 |
| adult | 7q11.23 | 74071990 | 74175022 | 2969      | <i>GTF2I</i>     | 0.2559 | -1.5318 |
| adult | 7q11.23 | 74188308 | 74203720 | 653361    | <i>NCF1</i>      | 0.2559 | -1.5318 |
| adult | 7q11.23 | 74298091 | 74306731 | 442582    | <i>STAG3L2</i>   | 0.2559 | -1.5318 |
| adult | 7q11.23 | 74456269 | 74489717 | 81554     | <i>WBSCR16</i>   | 0.2559 | -1.7576 |
| adult | 7q11.23 | 74508346 | 74565623 | 389524    | <i>GTF2IRD2B</i> | 0.2559 | -1.7576 |
| adult | 7q11.23 | 74572383 | 74587802 | 654817    | <i>NCF1C</i>     | 0.2559 | -1.7576 |
| adult | 7q11.23 | 74800771 | 74867509 | 729438    | <i>GATSL2</i>    | 0.2559 | -1.7576 |
| adult | 7q11.23 | 75024902 | 75034896 | 375593    | <i>TRIM73</i>    | 0.2559 | -2.0764 |
| adult | 7q11.2  | 75046059 | 75115565 | 100101267 | <i>POM121C</i>   | 0.2559 | -2.0764 |
| adult | 7q11.23 | 75137068 | 75157453 | 5387      | <i>PMS2P3</i>    | 0.2559 | -2.0764 |
| adult | 7q11.23 | 75162618 | 75368290 | 3092      | <i>HIP1</i>      | 0.2559 | -2.0764 |
| adult | 7q11.23 | 75398841 | 75419064 | 10344     | <i>CCL26</i>     | 0.2559 | -2.0764 |
| adult | 7q11.23 | 75441113 | 75443033 | 6369      | <i>CCL24</i>     | 0.2559 | -2.0764 |
| adult | 7q11.23 | 75508316 | 75518244 | 57414     | <i>RHBDD2</i>    | 0.2559 | -2.3931 |
| adult | 7q11.2  | 75544419 | 75616173 | 5447      | <i>POR</i>       | 0.2559 | -2.3931 |

|       |             |          |          |           |                               |        |         |
|-------|-------------|----------|----------|-----------|-------------------------------|--------|---------|
| adult | 7q11.23     | 75573100 | 75573234 | 677801    | <i>SNORA14A</i>               | 0.2559 | -2.3931 |
| adult | 7q11.23     | 75616154 | 75623992 | 83862     | <i>TMEM120A</i>               | 0.2559 | -2.3931 |
| adult | 7q11.23     | 75625654 | 75677321 | 51657     | <i>STYXL1</i>                 | 0.2559 | -2.3931 |
| adult | 7cen-q22    | 75677336 | 75696827 | 4191      | <i>MDH2</i>                   | 0.2559 | -2.3931 |
| adult | 7q11.23     | 75831210 | 75916609 | 222183    | <i>SRRM3</i>                  | 0.2559 | -2.3931 |
| adult | 7q11.23     | 75931874 | 75933614 | 3315      | <i>HSPB1</i>                  | 0.2559 | -2.3931 |
| adult | 7q11.23     | 75956107 | 75988342 | 7532      | <i>YWHAG</i>                  | 0.2559 | -2.3931 |
| adult | 7q11.23     | 76026840 | 76071388 | 7784      | <i>ZP3</i>                    | 0.2559 | -2.3931 |
| adult | 7p21.3      | 7606615  | 7647110  | 54468     | <i>MIOS</i>                   | 0.2466 | -2.8743 |
| adult | 7q11.23     | 76090971 | 76135312 | 113878    | <i>DTX2</i>                   | 0.2559 | -2.3931 |
| adult | 7q11.23     | 76099336 | 76104317 | 619190    | <i>FDSPSP2</i>                | 0.2559 | -2.3931 |
| adult | 7q11.2      | 76139739 | 76157199 | 80761     | <i>UPK3B</i>                  | 0      | -2.6206 |
| adult | 7q11.23     | 76178657 | 76257299 | 100133091 | <i>LOC100133091</i>           | 0      | -2.6509 |
| adult | 7q11.23     | 76239302 | 76256620 | 22932     | <i>POMZP3</i>                 | 0      | -2.6509 |
| adult | 7q11.23     | 76610138 | 76653076 | 441263    | <i>DTX2P1-UPK3BP1-PMS2P11</i> | 0      | -2.6509 |
| adult | 7q11.23     | 76751933 | 76924521 | 57639     | <i>CCDC146</i>                | 0      | -2.6509 |
| adult | 7p22        | 7676193  | 7758238  | 6119      | <i>RPA3</i>                   | 0.2466 | -2.9239 |
| adult | 7q11.23     | 76822687 | 76829150 | 10875     | <i>FGL2</i>                   | 0      | -2.6509 |
| adult | 7q11.23     | 76940067 | 77045717 | 54103     | <i>GSAP</i>                   | 0      | -2.6509 |
| adult | 7q11.23     | 77166772 | 77269388 | 5782      | <i>PTPN12</i>                 | 0      | -2.6509 |
| adult | 7q11.23     | 77325742 | 77409120 | 222194    | <i>RSBN1L</i>                 | 0      | -2.6509 |
| adult | 7q11.23     | 77423044 | 77427747 | 85025     | <i>TMEM60</i>                 | 0      | -2.6509 |
| adult | 7q11.23-q21 | 77428108 | 77553500 | 57157     | <i>PHTF2</i>                  | 0      | -2.6509 |
| adult | 7q21        | 77646373 | 79082890 | 9863      | <i>MAGI2</i>                  | 0      | -2.6509 |
| adult | 7q21.11     | 77976558 | 77988770 | 399670    | <i>RPL13AP17</i>              | 0      | -2.6509 |
| adult | 7q21        | 79764139 | 79848725 | 2770      | <i>GNAI1</i>                  | 0      | -2.9669 |
| adult | 7p21.3      | 8008373  | 8128709  | 113263    | <i>GLCC11</i>                 | 0.2466 | -2.6908 |
| adult | 7q21.11     | 80087950 | 80141325 | 346562    | <i>GNAT3</i>                  | 0      | -2.9669 |
| adult | 7q11.2      | 80231503 | 80303734 | 948       | <i>CD36</i>                   | 0      | -2.9669 |
| adult | 7q21-q31    | 80371853 | 80548667 | 10512     | <i>SEMA3C</i>                 | 0      | -2.9669 |
| adult | 7q21.1      | 81331443 | 81399452 | 3082      | <i>HGF</i>                    | 0      | -2.9669 |
| adult | 7p22        | 8152814  | 8301682  | 3382      | <i>ICA1</i>                   | 0.2466 | -2.6908 |
| adult | 7q21-q22    | 81575759 | 82073122 | 781       | <i>CACNA2D1</i>               | 0      | -2.7892 |

|       |              |          |          |           |                     |        |         |
|-------|--------------|----------|----------|-----------|---------------------|--------|---------|
| adult | 7q21.11      | 82383320 | 82792197 | 27445     | <i>PCLO</i>         | 0      | -2.5499 |
| adult | 7q21.11      | 82993221 | 83270747 | 9723      | <i>SEMA3E</i>       | 0      | -2.5499 |
| adult | 7p12.1       | 83587658 | 83824217 | 10371     | <i>SEMA3A</i>       | 0      | -2.5499 |
| adult | 7q21.11      | 84624871 | 84751247 | 223117    | <i>SEMA3D</i>       | 0      | -2.5499 |
| adult | 7p22         | 8473584  | 8792593  | 30010     | <i>NXPFI</i>        | 0.2466 | -2.6908 |
| adult | 7p22.3       | 855193   | 883509   | 23353     | <i>SUN1</i>         | 0      | -1.82   |
| adult | 7q21.1-q21.2 | 86273229 | 86494192 | 2913      | <i>GRM3</i>         | 0      | -2.5496 |
| adult | 7q21.12      | 86506222 | 86595291 | 222223    | <i>KIAA1324L</i>    | 0      | -2.5496 |
| adult | 7q21         | 86781676 | 86825648 | 9988      | <i>DMTF1</i>        | 0      | -2.5496 |
| adult | 7q21.12      | 86825477 | 86849031 | 79161     | <i>TMEM243</i>      | 0      | -2.5496 |
| adult | 7q21.1       | 86954663 | 86974808 | 11257     | <i>TP53TG1</i>      | 0      | -2.5496 |
| adult | 7q21.1       | 86974950 | 86989425 | 54677     | <i>CROT</i>         | 0      | -2.5496 |
| adult | 7q21.1       | 87031360 | 87105019 | 5244      | <i>ABCB4</i>        | 0      | -2.5496 |
| adult | 7q21.12      | 87133178 | 87342639 | 5243      | <i>ABCB1</i>        | 0      | -2.5496 |
| adult | 7q21.12      | 87257728 | 87461613 | 154661    | <i>RUNDC3B</i>      | 0      | -2.5496 |
| adult | 7q21.12      | 87463813 | 87505692 | 55972     | <i>SLC25A40</i>     | 0      | -2.5496 |
| adult | 7q21.3       | 87505543 | 87538856 | 10926     | <i>DBF4</i>         | 0      | -2.5496 |
| adult | 7q21         | 87563565 | 87811428 | 53616     | <i>ADAM22</i>       | 0      | -2.5496 |
| adult | 7q21.1       | 87834431 | 87849399 | 6717      | <i>SRI</i>          | 0      | -2.5496 |
| adult | 7q21.12      | 87905743 | 87936228 | 79689     | <i>STEAP4</i>       | 0      | -2.5496 |
| adult | 7q21.13      | 88388681 | 88966371 | 219578    | <i>ZNF804B</i>      | 0      | -2.5496 |
| adult | 7q21.13      | 88423419 | 88425031 | 219557    | <i>C7orf62</i>      | 0      | -2.5496 |
| adult | 7q21.13      | 89748713 | 89754914 | 442523    | <i>DPY19L2P4</i>    | 0      | -2.5496 |
| adult | 7q21         | 89783688 | 89794141 | 26872     | <i>STEAP1</i>       | 0      | -2.5496 |
| adult | 7q21.13      | 89840999 | 89866992 | 261729    | <i>STEAP2</i>       | 0.2381 | -2.5151 |
| adult | 7q21.13      | 89975978 | 90020769 | 85865     | <i>GTPBP10</i>      | 0.2381 | -2.5151 |
| adult | 7q21         | 90025605 | 90027550 | 101409256 | <i>LOC101409256</i> | 0.2381 | -2.5151 |
| adult | 7q21         | 90032647 | 90045268 | 9069      | <i>CLDN12</i>       | 0.2381 | -2.5151 |
| adult | 7q21-q22     | 90338711 | 90839905 | 5218      | <i>CDK14</i>        | 0.2381 | -2.5151 |
| adult | 7q21         | 90893782 | 90898132 | 8321      | <i>FZD1</i>         | 0.2381 | -2.5151 |
| adult | 7q21-q22     | 91570188 | 91739987 | 10142     | <i>AKAP9</i>        | 0.2381 | -2.4718 |
| adult | 7p22.3       | 916190   | 936071   | 51608     | <i>GET4</i>         | 0      | -1.82   |
| adult | 7q21.2       | 91741462 | 91763840 | 1595      | <i>CYP51A1</i>      | 0.2381 | -2.4718 |

|       |            |          |          |        |                 |        |         |
|-------|------------|----------|----------|--------|-----------------|--------|---------|
| adult | 7q21.2     | 91774197 | 91794590 | 401387 | <i>LRRD1</i>    | 0.2381 | -2.4718 |
| adult | 7q21.2     | 91828282 | 91875212 | 889    | <i>KRIT1</i>    | 0.2381 | -2.4718 |
| adult | 7q21.2     | 91875547 | 92030698 | 54467  | <i>ANKIB1</i>   | 0.2381 | -2.4718 |
| adult | 7q21-q22   | 92076761 | 92089381 | 57798  | <i>GATAD1</i>   | 0.2381 | -2.4718 |
| adult | 7q21.2     | 92116336 | 92157845 | 5189   | <i>PEX1</i>     | 0.2381 | -2.4718 |
| adult | 7q21.2     | 92158086 | 92169795 | 84060  | <i>RBM48</i>    | 0.2381 | -2.4718 |
| adult | 7q21.2     | 92167788 | 92169079 | 84849  | <i>MGC16142</i> | 0.2381 | -2.4718 |
| adult | 7q21.2     | 92190071 | 92219708 | 257415 | <i>FAM133B</i>  | 0.2381 | -2.4718 |
| adult | 7q21-q22   | 92234234 | 92463231 | 1021   | <i>CDK6</i>     | 0.2381 | -2.4718 |
| adult | 7q21.2     | 92728825 | 92747336 | 54809  | <i>SAMD9</i>    | 0.2381 | -2.7396 |
| adult | 7q21.2     | 92759366 | 92777701 | 219285 | <i>SAMD9L</i>   | 0.2381 | -2.7396 |
| adult | 7q21.3     | 92817898 | 92848908 | 253012 | <i>HEPACAM2</i> | 0.2381 | -2.7396 |
| adult | 7q21.3     | 92861652 | 92905737 | 55610  | <i>CCDC132</i>  | 0.2381 | -2.7396 |
| adult | 7q21.3     | 93053798 | 93189122 | 799    | <i>CALCR</i>    | 0.2381 | -2.7396 |
| adult | 7q21.3     | 93112071 | 93112167 | 724023 | <i>MIR653</i>   | 0.2381 | -2.7396 |
| adult | 7q21.3     | 93113247 | 93113331 | 574442 | <i>MIR489</i>   | 0.2381 | -2.7396 |
| adult | 7q22       | 93514708 | 93520303 | 7980   | <i>TFPI2</i>    | 0.2381 | -2.7396 |
| adult | 7q21.3     | 93535819 | 93540485 | 2792   | <i>GNGT1</i>    | 0.2381 | -2.7396 |
| adult | 7q21       | 93551015 | 93555826 | 2791   | <i>GNG11</i>    | 0.2794 | -2.6462 |
| adult | 7q21.1-q22 | 93622553 | 93633694 | 10282  | <i>BET1</i>     | 0.2794 | -2.6462 |
| adult | 7p22.3     | 937536   | 994319   | 11033  | <i>ADAP1</i>    | 0      | -2.0298 |
| adult | 7q22.1     | 94023872 | 94060544 | 1278   | <i>COL1A2</i>   | 0.2794 | -2.6462 |
| adult | 7q21.3     | 94139169 | 94186328 | 64921  | <i>CASD1</i>    | 0.2794 | -2.6462 |
| adult | 7q21.3     | 94214535 | 94285521 | 8910   | <i>SGCE</i>     | 0.2794 | -2.6462 |
| adult | 7q21       | 94285636 | 94299006 | 23089  | <i>PEG10</i>    | 0.2794 | -2.6462 |
| adult | 7q21.3     | 94536948 | 94925727 | 55607  | <i>PPP1R9A</i>  | 0.2794 | -2.6462 |
| adult | 7q21.3     | 94927668 | 94953884 | 5444   | <i>PON1</i>     | 0.2794 | -2.6462 |
| adult | 7q21.3     | 94989183 | 95025687 | 5446   | <i>PON3</i>     | 0.2794 | -2.6462 |
| adult | 7q21.3     | 95034173 | 95064384 | 5445   | <i>PON2</i>     | 0.2794 | -2.6462 |
| adult | 7q21-q22   | 95115212 | 95158113 | 51666  | <i>ASB4</i>     | 0.2794 | -2.6462 |
| adult | 7q21.3     | 95212808 | 95225925 | 5166   | <i>PDK4</i>     | 0.2794 | -2.6462 |
| adult | 7q21.3     | 95401817 | 95727736 | 1780   | <i>DYNC111</i>  | 0.2794 | -2.6462 |
| adult | 7q21.3     | 95749531 | 95951459 | 10165  | <i>SLC25A13</i> | 0.2794 | -2.6462 |

|       |              |          |          |           |                     |        |         |
|-------|--------------|----------|----------|-----------|---------------------|--------|---------|
| adult | 7q21.3       | 95848973 | 95849068 | 693176    | <i>MIR591</i>       | 0.2794 | -2.6462 |
| adult | 7q21.3       | 96110937 | 96132835 | 401388    | <i>C7orf76</i>      | 0.2794 | -2.6462 |
| adult | 7q21.3       | 96318078 | 96339203 | 7979      | <i>SHFM1</i>        | 0.2794 | -2.6462 |
| adult | 7q21.3       | 96597826 | 96643377 | 285987    | <i>DLX6-AS1</i>     | 0.2794 | -2.6023 |
| adult | 7q22         | 96635289 | 96640352 | 1750      | <i>DLX6</i>         | 0.2794 | -2.6023 |
| adult | 7q22         | 96649701 | 96654143 | 1749      | <i>DLX5</i>         | 0.2794 | -2.6023 |
| adult | 7p21.3       | 9673899  | 9675447  | 168741    | <i>PER4</i>         | 0.2466 | -2.947  |
| adult | 7q21-q22     | 97361270 | 97369784 | 6863      | <i>TAC1</i>         | 0.2794 | -2.6023 |
| adult | 7q21.3       | 97481428 | 97501477 | 440       | <i>ASNS</i>         | 0.2794 | -2.066  |
| adult | 7q21.3       | 97595907 | 97601638 | 389538    | <i>MGC72080</i>     | 0.2794 | -2.5063 |
| adult | 7q21.2       | 97614012 | 97619416 | 4951      | <i>OCM2</i>         | 0.2794 | -2.5063 |
| adult | 7q21.3       | 97736196 | 97838944 | 22853     | <i>LMTK2</i>        | 0.2794 | -2.5063 |
| adult | 7q21.3       | 97841565 | 97842271 | 168620    | <i>BHLHA15</i>      | 0.2794 | -2.5063 |
| adult | 7q21.3       | 97844754 | 97881563 | 25851     | <i>TECPR1</i>       | 0.2794 | -2.5063 |
| adult | 7q21.3       | 97910978 | 97920839 | 25798     | <i>BRI3</i>         | 0.2794 | -2.5063 |
| adult | 7q22.1       | 97920961 | 98030427 | 55971     | <i>BAIAP2L1</i>     | 0.2794 | -2.5063 |
| adult | 7q21.3-q22.1 | 98246596 | 98259181 | 4885      | <i>NPTX2</i>        | 0.2794 | -2.5063 |
| adult | 7q22.1       | 98444110 | 98467673 | 222865    | <i>TMEM130</i>      | 0.2794 | -2.5063 |
| adult | 7q21.2-q22.1 | 98476112 | 98610866 | 8295      | <i>TRRAP</i>        | 0.2794 | -2.5063 |
| adult | 7q21.2-q22.1 | 98479272 | 98479352 | 100500819 | <i>MIR3609</i>      | 0.2794 | -2.5063 |
| adult | 7q22.1       | 98625057 | 98741743 | 57154     | <i>SMURF1</i>       | 0.2794 | -2.5063 |
| adult | 7q22.1       | 98771196 | 98805089 | 402569    | <i>KPNA7</i>        | 0.2794 | -2.5063 |
| adult | 7q22.1       | 98870923 | 98895594 | 84176     | <i>MYH16</i>        | 0.2794 | -2.5063 |
| adult | 7q22.1       | 98923495 | 98963885 | 10552     | <i>ARPC1A</i>       | 0.2794 | -2.5063 |
| adult | 7q22.1       | 98972297 | 98992404 | 10095     | <i>ARPC1B</i>       | 0.2794 | -2.5063 |
| adult | 7q22.1       | 98992297 | 99006305 | 11333     | <i>PDAP1</i>        | 0.2794 | -2.5063 |
| adult | 7q22.1       | 99006600 | 99017239 | 8896      | <i>BUD31</i>        | 0.2794 | -2.5063 |
| adult | 7q22.1       | 99014361 | 99036462 | 26024     | <i>PTCD1</i>        | 0.2794 | -2.5063 |
| adult | 7q           | 99014361 | 99063824 | 100526740 | <i>ATP5J2-PTCD1</i> | 0.2794 | -2.5063 |
| adult | 7q22.1       | 99036562 | 99054996 | 10898     | <i>CPSF4</i>        | 0.2794 | -2.5063 |
| adult | 7q22.1       | 99055783 | 99063824 | 9551      | <i>ATP5J2</i>       | 0.2794 | -2.5063 |
| adult | 7q22.1       | 99070514 | 99079948 | 285989    | <i>ZNF789</i>       | 0.2794 | -2.5063 |
| adult | 7q22.1       | 99090853 | 99097877 | 84124     | <i>ZNF394</i>       | 0.2794 | -2.5063 |

|       |              |          |          |        |         |        |         |
|-------|--------------|----------|----------|--------|---------|--------|---------|
| adult | 7q22         | 99102272 | 99131445 | 23660  | ZKSCAN5 | 0.2794 | -2.5063 |
| adult | 7q22.1       | 99143922 | 99149757 | 221786 | FAM200A | 0.2794 | -2.5063 |
| adult | 7q22.1       | 99156044 | 99162328 | 79027  | ZNF655  | 0.2794 | -2.5063 |
| adult | 7q22.1       | 99214570 | 99230030 | 221785 | ZSCAN25 | 0.2794 | -2.5063 |
| adult | 7q21.1       | 99245811 | 99277649 | 1577   | CYP3A5  | 0.2794 | -2.5063 |
| adult | 7q22.1       | 99302659 | 99332823 | 1551   | CYP3A7  | 0.2794 | -2.5063 |
| adult | 7q21.1       | 99354582 | 99381811 | 1576   | CYP3A4  | 0.2794 | -2.5063 |
| adult | 7q21.1       | 99425635 | 99463727 | 64816  | CYP3A43 | 0.2794 | -2.5063 |
| adult | 7q22.1       | 99473684 | 99474656 | 81392  | OR2AE1  | 0.2794 | -2.5063 |
| adult | 7q22-q31.1   | 99488029 | 99517223 | 89122  | TRIM4   | 0.2794 | -2.5063 |
| adult | 7q22.1       | 99520891 | 99527243 | 349149 | GJC3    | 0.2794 | -2.5063 |
| adult | 7q22.1       | 99564349 | 99573735 | 563    | AZGP1   | 0.2794 | -2.5063 |
| adult | 7q22.1       | 99578384 | 99581860 | 646282 | AZGP1P1 | 0.2794 | -2.5063 |
| adult | 7q22         | 99613194 | 99639312 | 7586   | ZKSCAN1 | 0.2794 | -2.5063 |
| adult | 7q22.1       | 99647416 | 99662663 | 7589   | ZSCAN21 | 0.2794 | -2.5063 |
| adult | 7q22.1       | 99661469 | 99679387 | 7551   | ZNF3    | 0.2794 | -2.5063 |
| adult | 7q22.1       | 99686582 | 99689822 | 10980  | COPS6   | 0.2794 | -2.5063 |
| adult | 7q21.3-q22.1 | 99690350 | 99698403 | 4176   | MCM7    | 0.2794 | -2.5063 |
| adult | 7q22.1       | 99691182 | 99691266 | 407014 | MIR25   | 0.2794 | -2.5063 |
| adult | 7q22.1       | 99691390 | 99691470 | 407050 | MIR93   | 0.2794 | -2.5063 |
| adult | 7q22.1       | 99691615 | 99691697 | 406900 | MIR106B | 0.2794 | -2.5063 |
| adult | 7q22.1       | 99699129 | 99704803 | 9179   | AP4M1   | 0.2794 | -2.5063 |
| adult | 7q22.1       | 99704692 | 99716995 | 6878   | TAF6    | 0.2794 | -2.5063 |
| adult | 7q22.1       | 99717264 | 99723128 | 245812 | CNPY4   | 0.2794 | -2.5063 |
| adult | 7q22.1       | 99724316 | 99726121 | 255374 | MBLAC1  | 0.2794 | -2.5063 |
| adult | 7q22.1       | 99746529 | 99751833 | 389541 | LAMTOR4 | 0.2794 | -2.5063 |
| adult | 7q22.1       | 99752042 | 99756344 | 55262  | C7orf43 | 0.2794 | -2.5063 |
| adult | 7q22.1       | 99756864 | 99766373 | 79690  | GAL3ST4 | 0.2794 | -2.5063 |
| adult | 7q22.1       | 99767228 | 99775049 | 221914 | GPC2    | 0.2794 | -2.5063 |
| adult | 7q22.1       | 99775365 | 99812010 | 10734  | STAG3   | 0.2794 | -2.5063 |
| adult | 7q22.1       | 99798277 | 99869855 | 352954 | GATS    | 0.2794 | -2.5063 |
| adult | 7q22.1       | 99816870 | 99819111 | 79037  | PVRIG   | 0.2794 | -2.5063 |
| adult | 7q22.1       | 99905324 | 99919819 | 441272 | SPDYE3  | 0.2794 | -2.5063 |

|       |            |           |           |           |                  |        |         |
|-------|------------|-----------|-----------|-----------|------------------|--------|---------|
| adult | 7q22.1     | 99918262  | 99933930  | 5379      | <i>PMS2P1</i>    | 0.2794 | -2.5063 |
| adult | 7q22.1     | 99955625  | 99965454  | 29990     | <i>PILRB</i>     | 0.2794 | -2.5063 |
| adult | 7q22.1     | 99971067  | 99997722  | 29992     | <i>PILRA</i>     | 0.2794 | -2.5063 |
| adult | 7q22.1     | 99998494  | 100026431 | 55063     | <i>ZCWPW1</i>    | 0.2794 | -2.5063 |
| adult | 8q22.2     | 100025493 | 100133987 | 157680    | <i>VPS13B</i>    | 1.0372 | 0       |
| adult | 8q22.2     | 100548863 | 100548958 | 693184    | <i>MIR599</i>    | 1.0372 | 0       |
| adult | 8q22.2     | 100549013 | 100549089 | 100126309 | <i>MIR875</i>    | 1.0372 | 0       |
| adult | 8q22.2     | 100890222 | 100906242 | 1345      | <i>COX6C</i>     | 1.0372 | 0       |
| adult | 8q22.2     | 100973165 | 101118344 | 26166     | <i>RGS22</i>     | 1.0372 | 0       |
| adult | 8q22.2     | 101145587 | 101158099 | 286151    | <i>FBXO43</i>    | 1.0372 | 0       |
| adult | 8q22.2     | 101162838 | 101166230 | 5440      | <i>POLR2K</i>    | 1.0372 | 0       |
| adult | 8q22.2     | 101170262 | 101254132 | 6674      | <i>SPAG1</i>     | 1.0372 | 0       |
| adult | 8q22       | 101269286 | 101315487 | 25897     | <i>RNF19A</i>    | 1.0372 | 0       |
| adult | 8q22.2     | 101521979 | 101572014 | 157567    | <i>ANKRD46</i>   | 1.0372 | 0       |
| adult | 8q22.3     | 101585111 | 101661893 | 169166    | <i>SNX31</i>     | 1.0372 | 0       |
| adult | 8q22.2-q23 | 101715143 | 101734315 | 26986     | <i>PABPC1</i>    | 1.0372 | 0       |
| adult | 8q23.1     | 101930803 | 101962799 | 7534      | <i>YWHAZ</i>     | 1.0372 | 0       |
| adult | 8q22.3     | 102064281 | 102088479 | 441374    | <i>FLJ42969</i>  | 1.0372 | 0       |
| adult | 8q22.3     | 102209265 | 102217960 | 51123     | <i>ZNF706</i>    | 1.0372 | 0       |
| adult | 8q22.3     | 102381120 | 102381823 | 83955     | <i>NACAPI</i>    | 1.0372 | 0       |
| adult | 8q22.3     | 102504667 | 102681952 | 79977     | <i>GRHL2</i>     | 1.0372 | 0       |
| adult | 8q22.2     | 102698769 | 102803439 | 83988     | <i>NCALD</i>     | 1.0372 | 0       |
| adult | 8q23.1     | 103216728 | 103251059 | 50484     | <i>RRM2B</i>     | 1.0372 | 0       |
| adult | 8q22       | 103264501 | 103424917 | 51366     | <i>UBR5</i>      | 1.0372 | 0       |
| adult | 8q22.3     | 103563847 | 103573245 | 4956      | <i>ODF1</i>      | 1.0372 | 0       |
| adult | 8q22.2     | 103661004 | 103666192 | 7071      | <i>KLF10</i>     | 1.0372 | 0       |
| adult | 8q22.3     | 103838529 | 103876428 | 51582     | <i>AZIN1</i>     | 1.0372 | 0       |
| adult | 8q24.12    | 116420723 | 116681255 | 7227      | <i>TRPS1</i>     | 1.0486 | -0.3737 |
| adult | 8q23.3     | 116962735 | 117337297 | 100859921 | <i>LINC00536</i> | 1.0486 | -0.3737 |
| adult | 8q24.11    | 117657054 | 117768062 | 8667      | <i>EIF3H</i>     | 1.0486 | -0.3737 |
| adult | 8q24.11    | 117778741 | 117786921 | 84294     | <i>UTP23</i>     | 1.0486 | -0.3737 |
| adult | 8q24       | 117858172 | 117887105 | 5885      | <i>RAD21</i>     | 1.0486 | -0.3737 |
| adult | 8q24.11    | 117886662 | 117889107 | 644660    | <i>RAD21-ASI</i> | 1.0486 | -0.3737 |



|       |              |           |           |        |                   |        |         |
|-------|--------------|-----------|-----------|--------|-------------------|--------|---------|
| adult | 8q24.11      | 117950463 | 117956239 | 441376 | <i>AARD</i>       | 1.0486 | -0.3737 |
| adult | 8q24.11      | 117962511 | 118188953 | 169026 | <i>SLC30A8</i>    | 1.0486 | -0.3737 |
| adult | 8q24.11      | 118532951 | 118552501 | 90390  | <i>MED30</i>      | 1.0486 | -0.3737 |
| adult | 8q24.11      | 118811601 | 119124058 | 2131   | <i>EXT1</i>       | 1.0486 | 0       |
| adult | 8q24.12      | 119201694 | 119634184 | 401474 | <i>SAMD12</i>     | 1.0486 | 0       |
| adult | 8q24.12      | 119633239 | 119738306 | 552860 | <i>SAMD12-AS1</i> | 1.0486 | 0       |
| adult | 8q24         | 119935795 | 119964383 | 4982   | <i>TNFRSF11B</i>  | 1.0486 | 0       |
| adult | 8q23-q24.1   | 120079423 | 120119202 | 10584  | <i>COLEC10</i>    | 1.0486 | 0       |
| adult | 8q23         | 120220609 | 120257914 | 114569 | <i>MAL2</i>       | 1.0486 | 0       |
| adult | 8q24.1       | 120428551 | 120436678 | 4856   | <i>NOV</i>        | 1.0486 | 0       |
| adult | 8q24.1       | 120569316 | 120651106 | 5168   | <i>ENPP2</i>      | 1.0486 | 0       |
| adult | 8q24.12      | 120743013 | 120845074 | 6873   | <i>TAF2</i>       | 1.0486 | 0       |
| adult | 8q24.12      | 120846180 | 120868170 | 79075  | <i>DSCC1</i>      | 1.0486 | 0       |
| adult | 8q24.12      | 120885894 | 121063157 | 64798  | <i>DEPTOR</i>     | 1.0486 | 0       |
| adult | 8q23         | 121137346 | 121384273 | 7373   | <i>COL14A1</i>    | 1.0486 | 0       |
| adult | 8q22.1-q22.3 | 121408082 | 121457647 | 28998  | <i>MRPL13</i>     | 1.0486 | 0       |
| adult | 8q24.12      | 121457637 | 121535875 | 27085  | <i>MTBP</i>       | 1.0486 | 0       |
| adult | 8q23-q24     | 121547984 | 121824309 | 6641   | <i>SNTB1</i>      | 1.0486 | 0       |
| adult | 8p22         | 13424351  | 13425797  | 157773 | <i>C8orf48</i>    | 1.1814 | 0       |
| adult | 8p22         | 13947372  | 15095792  | 137868 | <i>SGCZ</i>       | 1.1814 | -0.246  |
| adult | 8p22         | 14710946  | 14711019  | 494332 | <i>MIR383</i>     | 1.1814 | -0.705  |
| adult | 8p22         | 15397595  | 15624158  | 7991   | <i>TUSC3</i>      | 1.1814 | -0.4728 |
| adult | 8p22         | 15965386  | 16050300  | 4481   | <i>MSR1</i>       | 1.1814 | -0.6762 |
| adult | 8p22         | 16850333  | 16859674  | 26281  | <i>FGF20</i>      | 1.2037 | -0.6762 |
| adult | 8p22         | 16884746  | 16980148  | 286097 | <i>MICU3</i>      | 1.2037 | -0.6762 |
| adult | 8p22         | 17013835  | 17080241  | 51201  | <i>ZDHHC2</i>     | 1.2037 | -0.6762 |
| adult | 8p22-p21.3   | 17086739  | 17104387  | 29883  | <i>CNOT7</i>      | 1.2037 | -0.6762 |
| adult | 8p22         | 17104400  | 17155533  | 137492 | <i>VPS37A</i>     | 1.2037 | -0.2268 |
| adult | 8p22         | 17154305  | 17271040  | 9108   | <i>MTMR7</i>      | 1.2037 | -0.2268 |
| adult | 8p22         | 17354596  | 17428077  | 6542   | <i>SLC7A2</i>     | 1.2037 | -0.2268 |
| adult | 8p22-p21.3   | 17433941  | 17500642  | 5157   | <i>PDGFRL</i>     | 1.2037 | -0.2268 |
| adult | 8p22         | 17501302  | 17555246  | 57509  | <i>MTUS1</i>      | 1.2037 | -0.2268 |
| adult | 8p22         | 17721899  | 17752913  | 2267   | <i>FGL1</i>       | 1.2037 | -0.2268 |

|       |            |          |          |           |                     |         |         |
|-------|------------|----------|----------|-----------|---------------------|---------|---------|
| adult | 8p22-p21.3 | 17780365 | 17887457 | 5108      | <i>PCMI</i>         | 1.2037  | 0       |
| adult | 8p22       | 17913807 | 17941879 | 427       | <i>ASAH1</i>        | 1.2037  | 0       |
| adult | 8p22       | 18027970 | 18081198 | 9         | <i>NAT1</i>         | 1.2037  | 0       |
| adult | 8p22       | 18248754 | 18258723 | 10        | <i>NAT2</i>         | 1.2037  | 0       |
| adult | 8p21.3     | 18384812 | 18666405 | 23362     | <i>PSD3</i>         | 1.2037  | 0       |
| adult | 8p21.3     | 19041185 | 19103032 | 100128993 | <i>LOC100128993</i> | 1.2037  | 0       |
| adult | 8p21.2     | 19171080 | 19253729 | 63898     | <i>SH2D4A</i>       | 1.2037  | 0       |
| adult | 8p21.3     | 19261671 | 19460056 | 55790     | <i>CSGALNACT1</i>   | 1.19595 | 0       |
| adult | 8p21.3     | 19674917 | 19709586 | 55174     | <i>INTS10</i>       | 1.1882  | 0       |
| adult | 8p22       | 19796581 | 19824770 | 4023      | <i>LPL</i>          | 1.1882  | 0       |
| adult | 8p21.3     | 20002365 | 20040717 | 6570      | <i>SLC18A1</i>      | 1.1882  | 0       |
| adult | 8p21.3     | 20054703 | 20079207 | 526       | <i>ATP6V1B2</i>     | 1.1882  | 0       |
| adult | 8p22       | 20103675 | 20112803 | 11178     | <i>LZTS1</i>        | 1.1882  | 0       |
| adult | 8p21.3     | 20831496 | 20852630 | 286114    | <i>LOC286114</i>    | 1.1882  | 0       |
| adult | 8p21.3     | 21549529 | 21646346 | 2675      | <i>GFRA2</i>        | 1.1882  | 0       |
| adult | 8p23.2     | 2792874  | 4852328  | 64478     | <i>CSMD1</i>        | 1.30375 | 0       |
| adult | 8p12       | 33228343 | 33330664 | 84750     | <i>FUT10</i>        | 1.0326  | 0       |
| adult | 8p12       | 33342684 | 33358778 | 84549     | <i>MAK16</i>        | 1.0326  | 0       |
| adult | 8p12       | 33356026 | 33370703 | 80185     | <i>TTI2</i>         | 1.0326  | 0       |
| adult | 8p12       | 33405271 | 33424646 | 79845     | <i>RNF122</i>       | 1.0326  | 0       |
| adult | 8p12       | 33448847 | 33457624 | 78986     | <i>DUSP26</i>       | 1.0326  | 0       |
| adult | 8p12       | 35092974 | 35652181 | 137970    | <i>UNC5D</i>        | 1.0326  | 0       |
| adult | 8p11.23    | 36641841 | 36793643 | 157855    | <i>KCNU1</i>        | 1.0326  | 0       |
| adult | 8p11.23    | 37553268 | 37557539 | 80139     | <i>ZNF703</i>       | 1.0326  | -0.2191 |
| adult | 8p11.2     | 37594096 | 37604071 | 11160     | <i>ERLIN2</i>       | 1.0326  | -0.2191 |
| adult | 8p11.23    | 37604073 | 37605564 | 728024    | <i>LOC728024</i>    | 1.0326  | -0.2191 |
| adult | 8p11.2     | 37620100 | 37637286 | 11212     | <i>PROSC</i>        | 1.0326  | -0.2191 |
| adult | 8p11.23    | 37701397 | 37707431 | 55290     | <i>BRF2</i>         | 1.0326  | -0.2191 |
| adult | 8p11.22    | 37716464 | 37757015 | 80223     | <i>RAB11FIP1</i>    | 1.0326  | -0.2191 |
| adult | 8p11.23    | 37791799 | 37797647 | 137362    | <i>GOT1L1</i>       | 1.0326  | -0.2191 |
| adult | 8p12       | 37820513 | 37824184 | 155       | <i>ADRB3</i>        | 1.0326  | -0.2191 |
| adult | 8p12       | 37888019 | 37917883 | 1978      | <i>EIF4EBP1</i>     | 1.0326  | -0.2191 |
| adult | 8p11.2     | 37963010 | 37997598 | 9070      | <i>ASH2L</i>        | 1.0326  | -0.2191 |

|       |                |          |          |           |                     |        |         |
|-------|----------------|----------|----------|-----------|---------------------|--------|---------|
| adult | 8p11.2         | 38000217 | 38008600 | 6770      | <i>STAR</i>         | 1.0326 | -0.2191 |
| adult | 8p11.2         | 38020838 | 38034248 | 27257     | <i>LSMI</i>         | 1.0326 | -0.2191 |
| adult | 8p11.23        | 38034105 | 38070819 | 9530      | <i>BAG4</i>         | 1.0326 | -0.2191 |
| adult | 8p11.23        | 38089008 | 38096610 | 23259     | <i>DDHD2</i>        | 1.0326 | -0.2191 |
| adult | 8p11.23        | 38120649 | 38126738 | 84513     | <i>PPAPDC1B</i>     | 1.0326 | -0.2191 |
| adult | 8p11.2         | 38132560 | 38239790 | 54904     | <i>WHSC1L1</i>      | 1.0326 | -0.2191 |
| adult | 8p11.23        | 38243958 | 38267042 | 137994    | <i>LETM2</i>        | 1.0326 | -0.2191 |
| adult | 8p11.23-p11.22 | 38268655 | 38325363 | 2260      | <i>FGFR1</i>        | 1.0326 | -0.2191 |
| adult | 8p11.22        | 38368351 | 38386180 | 389649    | <i>C8orf86</i>      | 1.0326 | -0.2191 |
| adult | 8p11.22        | 38457692 | 38458775 | 286140    | <i>RNF5P1</i>       | 1.0326 | -0.2191 |
| adult | 8p11.22        | 38585703 | 38710546 | 6867      | <i>TACCI</i>        | 1.0326 | -0.2191 |
| adult | 8p11.22        | 38758752 | 38831430 | 59339     | <i>PLEKHA2</i>      | 1.0326 | -0.2191 |
| adult | 8p11.22        | 38831667 | 38846181 | 203100    | <i>HTRA4</i>        | 1.0326 | -0.2191 |
| adult | 8p11.22        | 38846326 | 38854041 | 83877     | <i>TM2D2</i>        | 1.0326 | -0.2191 |
| adult | 8p11.22        | 38854504 | 38962779 | 8754      | <i>ADAM9</i>        | 1.0326 | -0.2191 |
| adult | 8p11.22        | 38965047 | 39142436 | 203102    | <i>ADAM32</i>       | 1.0326 | -0.2191 |
| adult | 8p11.22        | 39172181 | 39260375 | 255926    | <i>ADAM5</i>        | 1.0326 | -0.2191 |
| adult | 8p11.23        | 39308563 | 39380508 | 1587      | <i>ADAM3A</i>       | 1.0734 | -0.2191 |
| adult | 8p11.22        | 39420630 | 39437653 | 100130964 | <i>LOC100130964</i> | 1.0734 | -0.2191 |
| adult | 8p11.22        | 39442086 | 39469094 | 8749      | <i>ADAM18</i>       | 1.0734 | -0.2191 |
| adult | 8p11.2         | 39601254 | 39695808 | 2515      | <i>ADAM2</i>        | 1.0734 | -0.2191 |
| adult | 8p12-p11       | 39771327 | 39786309 | 3620      | <i>IDO1</i>         | 1.0734 | -0.2191 |
| adult | 8p11.21        | 39792473 | 39873910 | 169355    | <i>IDO2</i>         | 1.0734 | -0.2191 |
| adult | 8p11.2         | 40010986 | 40012827 | 56892     | <i>C8orf4</i>       | 1.0734 | -0.2191 |
| adult | 8p11.21        | 40388110 | 40755343 | 79698     | <i>ZMAT4</i>        | 1.0734 | 0       |
| adult | 8p11.21        | 41119475 | 41166990 | 6422      | <i>SFRP1</i>        | 1.0947 | 0       |
| adult | 8p11.21        | 41348080 | 41368499 | 51125     | <i>GOLGA7</i>       | 1.0947 | 0       |
| adult | 8p11.21        | 41386724 | 41402565 | 84296     | <i>GINS4</i>        | 1.0947 | 0       |
| adult | 8p11.21        | 41435706 | 41482520 | 137964    | <i>AGPAT6</i>       | 1.0947 | 0       |
| adult | 8p11.21        | 41503828 | 41504878 | 157848    | <i>NKX6-3</i>       | 1.0947 | 0       |
| adult | 8p11.1         | 41510743 | 41522804 | 286       | <i>ANK1</i>         | 1.0947 | 0       |
| adult | 8p11           | 41786996 | 41909544 | 7994      | <i>KAT6A</i>        | 1.0947 | 0       |
| adult | 8p11.2         | 42010463 | 42028701 | 10947     | <i>AP3M2</i>        | 1.0947 | 0       |

|       |                |          |          |           |                     |        |   |
|-------|----------------|----------|----------|-----------|---------------------|--------|---|
| adult | 8p12           | 42032235 | 42065194 | 5327      | <i>PLAT</i>         | 1.0947 | 0 |
| adult | 8p11.2         | 42128819 | 42190171 | 3551      | <i>IKBKB</i>        | 1.0947 | 0 |
| adult | 8q11.1         | 47752507 | 47765929 | 497634    | <i>LINC00293</i>    | 1.0876 | 0 |
| adult | 8q11.21        | 48100929 | 48104439 | 100287846 | <i>LOC100287846</i> | 1.0876 | 0 |
| adult | 8p11.2-p11.1   | 48649475 | 48650726 | 1052      | <i>CEBPD</i>        | 1.0876 | 0 |
| adult | 8q11           | 48685668 | 48872743 | 5591      | <i>PRKDC</i>        | 1.0876 | 0 |
| adult | 8q11.2         | 48872762 | 48890719 | 4173      | <i>MCM4</i>         | 1.0876 | 0 |
| adult | 8q11.21        | 48920994 | 48974454 | 7336      | <i>UBE2V2</i>       | 1.0876 | 0 |
| adult | 8q11.21        | 49627473 | 49647870 | 79645     | <i>EFCAB1</i>       | 1.0876 | 0 |
| adult | 8q11           | 49830238 | 49833999 | 6591      | <i>SNAI2</i>        | 1.0876 | 0 |
| adult | 8q11           | 49966894 | 49988642 | 492307    | <i>C8orf22</i>      | 1.0876 | 0 |
| adult | 8q11.21        | 50824338 | 51706678 | 54212     | <i>SNTG1</i>        | 1.1157 | 0 |
| adult | 8q11.22-q11.23 | 52232136 | 52722005 | 137902    | <i>PXDNL</i>        | 1.1438 | 0 |
| adult | 8q11.23        | 52730134 | 52811746 | 115294    | <i>PCMTD1</i>       | 1.1438 | 0 |
| adult | 8q11.23        | 53023391 | 53322439 | 9705      | <i>ST18</i>         | 1.1438 | 0 |
| adult | 8q11.23        | 53446596 | 53478021 | 389658    | <i>FAM150A</i>      | 1.1438 | 0 |
| adult | 8q11           | 53535017 | 53627026 | 9821      | <i>RB1CC1</i>       | 1.1438 | 0 |
| adult | 8p22-q21.13    | 53852467 | 53853454 | 2831      | <i>NPBWR1</i>       | 1.1438 | 0 |
| adult | 8q11.2         | 54138275 | 54164194 | 4986      | <i>OPRK1</i>        | 1.1438 | 0 |
| adult | 8q11.2         | 54628102 | 54755602 | 51606     | <i>ATP6V1H</i>      | 1.1438 | 0 |
| adult | 8q11.23        | 54764367 | 54871864 | 8601      | <i>RGS20</i>        | 1.1438 | 0 |
| adult | 8q11.2         | 54879113 | 54935016 | 6917      | <i>TCEA1</i>        | 1.1438 | 0 |
| adult | 8q11.23        | 54958926 | 55014577 | 10434     | <i>LYPLA1</i>       | 1.1438 | 0 |
| adult | 8q11.2-q13     | 55047780 | 55061074 | 29088     | <i>MRPL15</i>       | 1.1438 | 0 |
| adult | 8q11.23        | 55370494 | 55373456 | 64321     | <i>SOX17</i>        | 1.1438 | 0 |
| adult | 8q12.1         | 55528626 | 55543394 | 6101      | <i>RP1</i>          | 1.1438 | 0 |
| adult | 8q12.1         | 56015016 | 56438710 | 114786    | <i>XKR4</i>         | 1.0463 | 0 |
| adult | 8q12.1         | 56361756 | 56367881 | 100133234 | <i>SBF1P1</i>       | 1.0463 | 0 |
| adult | 8q12.1         | 56651302 | 56685966 | 137695    | <i>TMEM68</i>       | 1.0463 | 0 |
| adult | 8q11           | 56685790 | 56739004 | 96764     | <i>TGS1</i>         | 1.0463 | 0 |
| adult | 8q13           | 56792385 | 56925006 | 4067      | <i>LYN</i>          | 1.0463 | 0 |
| adult | 8q12           | 56980738 | 56987140 | 6224      | <i>RPS20</i>        | 1.0463 | 0 |
| adult | 8q12           | 56986397 | 56986460 | 26795     | <i>SNORD54</i>      | 1.0463 | 0 |

|       |          |          |          |           |                     |        |   |
|-------|----------|----------|----------|-----------|---------------------|--------|---|
| adult | 8q11     | 57025500 | 57026541 | 4342      | <i>MOS</i>          | 1.0463 | 0 |
| adult | 8q12     | 57073467 | 57123859 | 5324      | <i>PLAG1</i>        | 1.0463 | 0 |
| adult | 8q12.1   | 57124196 | 57131357 | 79145     | <i>CHCHD7</i>       | 1.0463 | 0 |
| adult | 8q12.1   | 57212569 | 57233241 | 195814    | <i>SDR16C5</i>      | 1.0463 | 0 |
| adult | 8q23-q24 | 57353512 | 57359293 | 5179      | <i>PENK</i>         | 1.0463 | 0 |
| adult | 8q12.1   | 57870487 | 57906430 | 54928     | <i>IMPAD1</i>       | 1.0463 | 0 |
| adult | 8q12.1   | 58173784 | 58179170 | 286177    | <i>LOC286177</i>    | 1.0463 | 0 |
| adult | 8q12.1   | 58192101 | 58197290 | 26138     | <i>LINC00588</i>    | 1.0463 | 0 |
| adult | 8q12.1   | 58907112 | 59062277 | 90362     | <i>FAM110B</i>      | 1.0463 | 0 |
| adult | 8q12.1   | 59323822 | 59364060 | 137886    | <i>UBXN2B</i>       | 1.0463 | 0 |
| adult | 8q11-q12 | 59402736 | 59412720 | 1581      | <i>CYP7A1</i>       | 1.0463 | 0 |
| adult | 8q12     | 59465727 | 59495419 | 6386      | <i>SDCBP</i>        | 1.0463 | 0 |
| adult | 8q12-q13 | 59496063 | 59571966 | 8439      | <i>NSMAF</i>        | 1.0463 | 0 |
| adult | 8q12.1   | 59717976 | 60031767 | 9760      | <i>TOX</i>          | 1.0463 | 0 |
| adult | 8q12.1   | 61101422 | 61193954 | 767       | <i>CA8</i>          | 1.0463 | 0 |
| adult | 8q12.1   | 61429468 | 61536203 | 5862      | <i>RAB2A</i>        | 1.0463 | 0 |
| adult | 8q12.2   | 61591323 | 61780586 | 55636     | <i>CHD7</i>         | 1.0463 | 0 |
| adult | 8q12.2   | 61878679 | 61880307 | 100130298 | <i>LOC100130298</i> | 1.0463 | 0 |
| adult | 8q12.3   | 62200524 | 62414204 | 157807    | <i>CLVS1</i>        | 1.0463 | 0 |
| adult | 8q12.1   | 62413114 | 62602408 | 444       | <i>ASPH</i>         | 1.0463 | 0 |
| adult | 8q12.3   | 63890419 | 63897460 | 643763    | <i>UG0898H09</i>    | 1.0463 | 0 |
| adult | 8q12.3   | 63927638 | 63951610 | 8836      | <i>GGH</i>          | 1.0463 | 0 |
| adult | 8q12.3   | 63972047 | 63998612 | 7274      | <i>TTPA</i>         | 1.0463 | 0 |
| adult | 8q12.3   | 64081111 | 64125346 | 253943    | <i>YTHDF3</i>       | 1.0463 | 0 |
| adult | 8q12.3   | 65291705 | 65291814 | 406908    | <i>MIR124-2</i>     | 1.0463 | 0 |
| adult | 8q12.3   | 65486865 | 65489820 | 401463    | <i>LOC401463</i>    | 1.0463 | 0 |
| adult | 8q13     | 65492794 | 65496191 | 27319     | <i>BHLHE22</i>      | 1.0463 | 0 |
| adult | 8q21.3   | 65508528 | 65711348 | 9420      | <i>CYP7B1</i>       | 1.0463 | 0 |
| adult | 8q13.1   | 66073379 | 66092575 | 552859    | <i>LINC00251</i>    | 1.0463 | 0 |
| adult | 8q13.1   | 66514690 | 66546452 | 55156     | <i>ARMC1</i>        | 1.0463 | 0 |
| adult | 8q13.1   | 66556887 | 66620573 | 9650      | <i>MTFR1</i>        | 1.0463 | 0 |
| adult | 8q13     | 66626568 | 66701329 | 5150      | <i>PDE7A</i>        | 1.0463 | 0 |
| adult | 8q13.1   | 66933790 | 67012755 | 85479     | <i>DNAJC5B</i>      | 1.0463 | 0 |

|       |        |          |          |           |                  |        |   |
|-------|--------|----------|----------|-----------|------------------|--------|---|
| adult | 8q13.1 | 67039277 | 67087718 | 84675     | <i>TRIM55</i>    | 1.0463 | 0 |
| adult | 8q13   | 67088611 | 67090880 | 1392      | <i>CRH</i>       | 1.0463 | 0 |
| adult | 8q13.1 | 67341262 | 67342968 | 23212     | <i>RRS1</i>      | 1.0463 | 0 |
| adult | 8q13.1 | 67344717 | 67381044 | 137872    | <i>ADHFE1</i>    | 1.0463 | 0 |
| adult | 8q13.1 | 67405490 | 67430759 | 254778    | <i>C8orf46</i>   | 1.0463 | 0 |
| adult | 8q13.1 | 67474409 | 67525484 | 4603      | <i>MYBL1</i>     | 1.0463 | 0 |
| adult | 8q13   | 67542487 | 67579452 | 80124     | <i>VCPIP1</i>    | 1.0463 | 0 |
| adult | 8q13.1 | 67579786 | 67593377 | 56260     | <i>C8orf44</i>   | 1.0463 | 0 |
| adult | 8q12   | 67624652 | 67774257 | 23678     | <i>SGK3</i>      | 1.0463 | 0 |
| adult | 8q13.1 | 67679631 | 67680240 | 26255     | <i>PTTG3P</i>    | 1.0463 | 0 |
| adult | 8q13.1 | 67782983 | 67814014 | 157777    | <i>MCMDC2</i>    | 1.0463 | 0 |
| adult | 8q13   | 67834164 | 67837777 | 641638    | <i>SNHG6</i>     | 1.0463 | 0 |
| adult | 8q13.1 | 67834708 | 67834784 | 641648    | <i>SNORD87</i>   | 1.0463 | 0 |
| adult | 8q13.1 | 67858735 | 67874825 | 100129654 | <i>TCF24</i>     | 1.0463 | 0 |
| adult | 8q13.1 | 67900366 | 67940786 | 286187    | <i>PPP1R42</i>   | 1.0463 | 0 |
| adult | 8q13.1 | 67955314 | 67974562 | 10987     | <i>COPS5</i>     | 1.0463 | 0 |
| adult | 8q13.2 | 67976602 | 68108849 | 79848     | <i>CSPP1</i>     | 1.0463 | 0 |
| adult | 8q13   | 68109883 | 68255912 | 10565     | <i>ARFGEF1</i>   | 1.0463 | 0 |
| adult | 8q13.2 | 68334404 | 68658620 | 57094     | <i>CPA6</i>      | 1.0463 | 0 |
| adult | 8q13.2 | 68864602 | 69017654 | 80243     | <i>PREX2</i>     | 1.0463 | 0 |
| adult | 8q13   | 69242956 | 69448062 | 116328    | <i>C8orf34</i>   | 1.0463 | 0 |
| adult | 8q13.2 | 70378858 | 70573147 | 23213     | <i>SULF1</i>     | 1.0463 | 0 |
| adult | 8q13.3 | 70584567 | 70745404 | 81796     | <i>SLCO5A1</i>   | 1.0463 | 0 |
| adult | 8q13.3 | 70963885 | 70983562 | 63978     | <i>PRDM14</i>    | 1.0463 | 0 |
| adult | 8q13.3 | 71024266 | 71316020 | 10499     | <i>NCOA2</i>     | 1.0463 | 0 |
| adult | 8q13.3 | 71485452 | 71520694 | 23471     | <i>TRAM1</i>     | 1.0463 | 0 |
| adult | 8q13.3 | 71549500 | 71581447 | 51110     | <i>LACTB2</i>    | 1.0463 | 0 |
| adult | 8q13.3 | 71581599 | 71648177 | 389668    | <i>XKR9</i>      | 1.0463 | 0 |
| adult | 8q13.3 | 72109667 | 72268746 | 2138      | <i>EYAI</i>      | 1.0463 | 0 |
| adult | 8q21   | 72753776 | 72756731 | 9242      | <i>MSC</i>       | 1.0463 | 0 |
| adult | 8q13   | 72933485 | 72987819 | 8989      | <i>TRPA1</i>     | 1.0463 | 0 |
| adult | 8q13.3 | 73114986 | 73163869 | 392232    | <i>LOC392232</i> | 1.0463 | 0 |
| adult | 8q13.2 | 73449625 | 73850584 | 9312      | <i>KCNB2</i>     | 1.0463 | 0 |

|       |              |          |          |           |                     |        |   |
|-------|--------------|----------|----------|-----------|---------------------|--------|---|
| adult | 8q21.11      | 73921096 | 73959987 | 7013      | <i>TERF1</i>        | 1.0463 | 0 |
| adult | 8q21.11      | 73976777 | 74005507 | 157869    | <i>SBSPON</i>       | 1.0463 | 0 |
| adult | 8q21.11      | 74202873 | 74205869 | 6129      | <i>RPL7</i>         | 1.0463 | 0 |
| adult | 8q21.11      | 74206836 | 74237520 | 157506    | <i>RDH10</i>        | 1.0463 | 0 |
| adult | 8q21.11      | 74332308 | 74353753 | 100128126 | <i>STAU2-AS1</i>    | 1.0463 | 0 |
| adult | 8q21.11      | 74332603 | 74659162 | 27067     | <i>STAU2</i>        | 1.0463 | 0 |
| adult | 8q21.11      | 74692331 | 74791145 | 55284     | <i>UBE2W</i>        | 1.0463 | 0 |
| adult | 8q21.11      | 74857372 | 74884143 | 6921      | <i>TCEB1</i>        | 1.0463 | 0 |
| adult | 8q21.11      | 74888376 | 74895018 | 54968     | <i>TMEM70</i>       | 1.0463 | 0 |
| adult | 8q21.11      | 74903563 | 74941307 | 23643     | <i>LY96</i>         | 1.0463 | 0 |
| adult | 8q21         | 75146934 | 75233596 | 56704     | <i>JPH1</i>         | 1.0463 | 0 |
| adult | 8q21.11      | 75262617 | 75279335 | 54332     | <i>GDAP1</i>        | 1.0463 | 0 |
| adult | 8q21.11      | 75736771 | 75767264 | 51050     | <i>PII5</i>         | 1.1037 | 0 |
| adult | 8q21.11      | 75896707 | 75946793 | 83690     | <i>CRISPLD1</i>     | 1.1037 | 0 |
| adult | 8q21.11      | 76452202 | 76479061 | 3174      | <i>HNF4G</i>        | 1.1037 | 0 |
| adult | 8q21.11      | 77523113 | 77595510 | 100192378 | <i>ZFHX4-AS1</i>    | 1.1002 | 0 |
| adult | 8q21.11      | 77593514 | 77779521 | 79776     | <i>ZFHX4</i>        | 1.0967 | 0 |
| adult | 8q21.1       | 77892493 | 77912524 | 5828      | <i>PEX2</i>         | 1.0967 | 0 |
| adult | 8q21.12      | 79428335 | 79517502 | 5569      | <i>PKIA</i>         | 1.0967 | 0 |
| adult | 8q21.12      | 79578281 | 79631997 | 51101     | <i>ZC2HC1A</i>      | 1.0967 | 0 |
| adult | 8q21         | 79635082 | 79636609 | 101241902 | <i>LOC101241902</i> | 1.0967 | 0 |
| adult | 8q12-q13     | 79645006 | 79717758 | 3574      | <i>IL7</i>          | 1.0967 | 0 |
| adult | 8q21.13      | 80523048 | 80578410 | 11075     | <i>STMN2</i>        | 1.0967 | 0 |
| adult | 8q21         | 80676244 | 80680098 | 23462     | <i>HEY1</i>         | 1.0967 | 0 |
| adult | 8q21.1-q21.2 | 80831094 | 80942506 | 28957     | <i>MRPS28</i>       | 1.0967 | 0 |
| adult | 8q21.13      | 80947102 | 80993066 | 7163      | <i>TPD52</i>        | 1.0967 | 0 |
| adult | 8q13-q21.1   | 81397853 | 81438500 | 65986     | <i>ZBTB10</i>       | 1.0967 | 0 |
| adult | 8q21.13      | 81540685 | 81787016 | 619279    | <i>ZNF704</i>       | 1.0967 | 0 |
| adult | 8q21.13      | 81880045 | 82024303 | 55824     | <i>PAG1</i>         | 1.0967 | 0 |
| adult | 8q21.13      | 82192717 | 82197012 | 2171      | <i>FABP5</i>        | 1.0967 | 0 |
| adult | 8q21.3-q22.1 | 82352563 | 82359719 | 5375      | <i>PMP2</i>         | 1.0967 | 0 |
| adult | 8q21.13      | 82370617 | 82373758 | 646480    | <i>FABP9</i>        | 1.0967 | 0 |
| adult | 8q21         | 82390731 | 82395473 | 2167      | <i>FABP4</i>        | 1.0967 | 0 |

|       |               |          |          |           |                |        |   |
|-------|---------------|----------|----------|-----------|----------------|--------|---|
| adult | 8q21.13       | 82437280 | 82443550 | 646486    | <i>FABP12</i>  | 1.0967 | 0 |
| adult | 8q21.13-q21.3 | 82569150 | 82598589 | 3612      | <i>IMPA1</i>   | 1.0967 | 0 |
| adult | 8q21.13       | 82605890 | 82607207 | 347051    | <i>SLC10A5</i> | 1.0967 | 0 |
| adult | 8q21.13       | 82613565 | 82633539 | 79752     | <i>ZFAND1</i>  | 1.3018 | 0 |
| adult | 8q21.13       | 82644687 | 82671748 | 92421     | <i>CHMP4C</i>  | 1.3274 | 0 |
| adult | 8q21.13       | 82711817 | 82754521 | 64089     | <i>SNX16</i>   | 1.3274 | 0 |
| adult | 8q21.2        | 85095452 | 85834078 | 138046    | <i>RALYL</i>   | 1.3274 | 0 |
| adult | 8q21.2        | 86019322 | 86058314 | 85444     | <i>LRRCC1</i>  | 1.3274 | 0 |
| adult | 8q21.2        | 86089618 | 86126753 | 1875      | <i>E2F5</i>    | 1.3274 | 0 |
| adult | 8q21.2        | 86126287 | 86132651 | 401466    | <i>C8orf59</i> | 1.3274 | 0 |
| adult | 8q21.2        | 86157715 | 86196302 | 377677    | <i>CA13</i>    | 1.3274 | 0 |
| adult | 8q21.2        | 86240457 | 86253943 | 759       | <i>CA1</i>     | 1.3274 | 0 |
| adult | 8q21.2        | 86351055 | 86361267 | 761       | <i>CA3</i>     | 1.3274 | 0 |
| adult | 8q22          | 86376130 | 86393721 | 760       | <i>CA2</i>     | 1.3274 | 0 |
| adult | 8q21.3        | 87060690 | 87081851 | 85481     | <i>PSKH2</i>   | 1.2747 | 0 |
| adult | 8q21.3        | 87226287 | 87242604 | 157724    | <i>SLC7A13</i> | 1.2747 | 0 |
| adult | 8q21          | 87354993 | 87480178 | 11059     | <i>WWP1</i>    | 1.2747 | 0 |
| adult | 8q21.3        | 87484577 | 87521009 | 51115     | <i>RMDN1</i>   | 1.2747 | 0 |
| adult | 8q21.3        | 87526655 | 87573726 | 8895      | <i>CPNE3</i>   | 1.2747 | 0 |
| adult | 8q21.3        | 87586162 | 87755903 | 54714     | <i>CNGB3</i>   | 1.2747 | 0 |
| adult | 8q21.3        | 87878675 | 88394955 | 168975    | <i>CNBD1</i>   | 1.2747 | 0 |
| adult | 8q21.3        | 88882970 | 88886296 | 138009    | <i>DCAF4L2</i> | 1.2747 | 0 |
| adult | 8q21.3        | 89049459 | 89339717 | 4325      | <i>MMP16</i>   | 1.2747 | 0 |
| adult | 8q21          | 90769974 | 90803292 | 8767      | <i>RIPK2</i>   | 1.2747 | 0 |
| adult | 8q21          | 90914095 | 90940095 | 734       | <i>OSGIN2</i>  | 1.2747 | 0 |
| adult | 8q21          | 90945563 | 90996899 | 4683      | <i>NBN</i>     | 1.2747 | 0 |
| adult | 8q21.3        | 91013579 | 91064227 | 1666      | <i>DECR1</i>   | 1.2747 | 0 |
| adult | 8q21.3        | 91070835 | 91095109 | 793       | <i>CALB1</i>   | 1.2747 | 0 |
| adult | 8q21.3        | 91634222 | 91658133 | 169200    | <i>TMEM64</i>  | 1.2747 | 0 |
| adult | 8q21.3        | 91803920 | 91971630 | 64168     | <i>NECAB1</i>  | 1.2747 | 0 |
| adult | 8q21.3        | 92006501 | 92053203 | 55529     | <i>TMEM55A</i> | 1.2747 | 0 |
| adult | 8q21.3        | 92082423 | 92099323 | 51633     | <i>OTUD6B</i>  | 1.2747 | 0 |
| adult | 8q21.3        | 92114846 | 92231464 | 100130742 | <i>LRRCC69</i> | 1.2747 | 0 |



|       |          |          |          |           |                     |        |   |
|-------|----------|----------|----------|-----------|---------------------|--------|---|
| adult | 8q23     | 92261515 | 92406946 | 115111    | <i>SLC26A7</i>      | 1.2747 | 0 |
| adult | 8q22     | 92967194 | 93029908 | 862       | <i>RUNX1T1</i>      | 1.2747 | 0 |
| adult | 8q22.1   | 93725189 | 93798288 | 441369    | <i>FLJ46284</i>     | 1.2747 | 0 |
| adult | 8q22.1   | 93895757 | 93977817 | 286144    | <i>TRIQQ</i>        | 1.2747 | 0 |
| adult | 8q22.1   | 94146323 | 94179079 | 389676    | <i>C8orf87</i>      | 1.2747 | 0 |
| adult | 8q22.1   | 94358694 | 94712661 | 642924    | <i>LINC00535</i>    | 1.2747 | 0 |
| adult | 8q22.1   | 94712734 | 94741478 | 137392    | <i>FAM92A1</i>      | 1.2747 | 0 |
| adult | 8q22.1   | 94743730 | 94753224 | 389677    | <i>RBM12B</i>       | 1.2747 | 0 |
| adult | 8q22.1   | 94752338 | 94753047 | 55472     | <i>RBM12B-AS1</i>   | 1.2747 | 0 |
| adult | 8q22.1   | 94767071 | 94830347 | 91147     | <i>TMEM67</i>       | 1.2747 | 0 |
| adult | 8q22.1   | 94929082 | 94938296 | 54704     | <i>PDP1</i>         | 1.2747 | 0 |
| adult | 8q22.1   | 95139393 | 95220815 | 1015      | <i>CDH17</i>        | 1.2747 | 0 |
| adult | 8q13-q21 | 95261484 | 95274547 | 2669      | <i>GEM</i>          | 1.2747 | 0 |
| adult | 8q22.1   | 95384187 | 95449180 | 25788     | <i>RAD54B</i>       | 1.2747 | 0 |
| adult | 8q       | 95439939 | 95449180 | 100861412 | <i>FSBP</i>         | 1.2747 | 0 |
| adult | 8q22.1   | 95500004 | 95565746 | 25962     | <i>KIAA1429</i>     | 1.044  | 0 |
| adult | 8q22.1   | 95649512 | 95651695 | 100288748 | <i>LOC100288748</i> | 1.044  | 0 |
| adult | 8q22.1   | 95653363 | 95719694 | 54845     | <i>ESRP1</i>        | 1.044  | 0 |
| adult | 8q22.1   | 95732102 | 95806076 | 286148    | <i>DPY19L4</i>      | 1.0372 | 0 |
| adult | 8q22.1   | 95835517 | 95892721 | 55656     | <i>INTS8</i>        | 1.0372 | 0 |
| adult | 8q22.1   | 95892452 | 95907482 | 9134      | <i>CCNE2</i>        | 1.0372 | 0 |
| adult | 8q22     | 95938199 | 95961615 | 94241     | <i>TP53INP1</i>     | 1.0372 | 0 |
| adult | 8q22.1   | 96037213 | 96070944 | 137682    | <i>NDUFAF6</i>      | 1.0372 | 0 |
| adult | 8q22.1   | 96145948 | 96168913 | 79666     | <i>PLEKHF2</i>      | 1.0372 | 0 |
| adult | 8q22.1   | 96257140 | 96281462 | 157657    | <i>C8orf37</i>      | 1.0372 | 0 |
| adult | 8q22.1   | 97154557 | 97173020 | 392255    | <i>GDF6</i>         | 1.0372 | 0 |
| adult | 8q22     | 97238903 | 97247862 | 7381      | <i>UQCRB</i>        | 1.0372 | 0 |
| adult | 8q22     | 97274113 | 97346779 | 9791      | <i>PTDSSI</i>       | 1.0372 | 0 |
| adult | 8q22-q23 | 97505881 | 97624037 | 6383      | <i>SDC2</i>         | 1.0372 | 0 |
| adult | 8q22.2   | 97657454 | 98155731 | 10404     | <i>CPQ</i>          | 1.0372 | 0 |
| adult | 8q22.1   | 98285713 | 98290176 | 85453     | <i>TSPYL5</i>       | 1.0372 | 0 |
| adult | 8q22.1   | 98656406 | 98742488 | 92140     | <i>MTDH</i>         | 1.0372 | 0 |
| adult | 8q22.1   | 98787808 | 98864830 | 55353     | <i>LAPTM4B</i>      | 1.0372 | 0 |

|       |          |          |          |           |                  |         |         |
|-------|----------|----------|----------|-----------|------------------|---------|---------|
| adult | 8q22     | 98881248 | 99048946 | 4147      | <i>MATN2</i>     | 1.0372  | 0       |
| adult | 8q22     | 99053937 | 99057818 | 6156      | <i>RPL30</i>     | 1.0372  | 0       |
| adult | 8q22     | 99054313 | 99054445 | 26775     | <i>SNORA72</i>   | 1.0372  | 0       |
| adult | 8q22     | 99114566 | 99129418 | 10247     | <i>HRSP12</i>    | 1.0372  | 0       |
| adult | 8q22.1   | 99129520 | 99172069 | 10940     | <i>POPI</i>      | 1.0372  | 0       |
| adult | 8q22.2   | 99204386 | 99306621 | 79815     | <i>NIPAL2</i>    | 1.0372  | 0       |
| adult | 8q22     | 99439249 | 99443023 | 3788      | <i>KCNS2</i>     | 1.0372  | 0       |
| adult | 8q22.2   | 99466858 | 99837899 | 6788      | <i>STK3</i>      | 1.0372  | 0       |
| adult | 8q22.2   | 99956630 | 99964332 | 116039    | <i>OSR2</i>      | 1.0372  | 0       |
| adult | 9p24.3   | 1050345  | 1057554  | 10655     | <i>DMRT2</i>     | 0.2975  | -2.1972 |
| adult | 9p24.3   | 116230   | 118417   | 2298      | <i>FOXD4</i>     | 0.2975  | -1.5045 |
| adult | 9p24.3   | 11986    | 14525    | 100287596 | <i>DDX11L5</i>   | 0.2975  | -1.5045 |
| adult | 9p24.3   | 121037   | 179075   | 55871     | <i>CBWD1</i>     | 0.2975  | -1.8201 |
| adult | 9p23     | 12693385 | 12710266 | 7306      | <i>TYRP1</i>     | 0       | -3.9262 |
| adult | 9p23     | 12775011 | 12823059 | 286343    | <i>LURAPIL</i>   | 0       | -3.9262 |
| adult | 9p23     | 13105702 | 13279563 | 8777      | <i>MPDZ</i>      | 0       | -3.9262 |
| adult | 9p23     | 13927969 | 13945606 | 100113404 | <i>LINC00583</i> | 0       | -2.9486 |
| adult | 9p24.1   | 14081841 | 14314045 | 4781      | <i>NFIB</i>      | 0.307   | -2.515  |
| adult | 9p24.3   | 14510    | 29739    | 100287171 | <i>WASH1</i>     | 0.2975  | -1.5045 |
| adult | 9p22.3   | 14611068 | 14693480 | 340481    | <i>ZDHHC21</i>   | 0.5104  | -2.0471 |
| adult | 9p23-p22 | 14719731 | 14722715 | 9350      | <i>CERI</i>      | 0.5742  | -2.0129 |
| adult | 9p22.3   | 14734663 | 14779531 | 158326    | <i>FREMI</i>     | 0.5742  | -2.0129 |
| adult | 9p22.3   | 14993324 | 15019722 | 389705    | <i>LOC389705</i> | 0.5742  | -2.0129 |
| adult | 9p22.3   | 15170841 | 15250198 | 158219    | <i>TTC39B</i>    | 0.5742  | -1.9521 |
| adult | 9p22.3   | 15422781 | 15461627 | 6619      | <i>SNAPC3</i>    | 0.5742  | -1.9521 |
| adult | 9p22.3   | 15464064 | 15511017 | 11168     | <i>PSIP1</i>     | 0.5742  | -1.9521 |
| adult | 9p22.3   | 15553096 | 15971897 | 203238    | <i>CCDC171</i>   | 0.56865 | -1.9521 |
| adult | 9p22.3   | 16203932 | 16253105 | 100129385 | <i>C9orf92</i>   | 0.5631  | -2.3461 |
| adult | 9p22.2   | 16409500 | 16870786 | 54796     | <i>BNC2</i>      | 0.5631  | -2.3461 |
| adult | 9p22.2   | 17134988 | 17302049 | 54875     | <i>CNTLN</i>     | 0.5631  | -2.0323 |
| adult | 9p22     | 17578951 | 17797126 | 6456      | <i>SH3GL2</i>    | 0.5631  | -2.2579 |
| adult | 9p21.3   | 18474078 | 18684952 | 92949     | <i>ADAMTSL1</i>  | 0.4773  | -2.4291 |
| adult | 9p22.1   | 19049371 | 19051021 | 10670     | <i>RRAGA</i>     | 0.4773  | -2.4015 |

|       |        |          |          |        |                |        |         |
|-------|--------|----------|----------|--------|----------------|--------|---------|
| adult | 9p22.1 | 19053134 | 19102940 | 54801  | <i>HAUS6</i>   | 0.4773 | -2.4015 |
| adult | 9p22.1 | 19063653 | 19063784 | 677776 | <i>SCARNA8</i> | 0.4773 | -2.4015 |
| adult | 9p22.1 | 19115758 | 19127604 | 123    | <i>PLIN2</i>   | 0.4773 | -2.4015 |
| adult | 9p22.1 | 19230762 | 19374266 | 55667  | <i>DENND4C</i> | 0.4773 | -2.4015 |
| adult | 9p21   | 19376253 | 19380235 | 6194   | <i>RPS6</i>    | 0.4773 | -2.4015 |
| adult | 9p22.1 | 19408924 | 19452500 | 340485 | <i>ACER2</i>   | 0.4773 | -4.4015 |
| adult | 9p22.1 | 19507449 | 19787017 | 25769  | <i>SLC24A2</i> | 0.2299 | -8.2125 |
| adult | 9p22.3 | 2015218  | 2193623  | 6595   | <i>SMARCA2</i> | 0.2975 | -2.1972 |
| adult | 9p22   | 20341662 | 20622542 | 4300   | <i>MLLT3</i>   | 0.2299 | -9.5844 |
| adult | 9p21   | 20658307 | 20995954 | 54914  | <i>FOCAD</i>   | 0.2299 | -12.111 |
| adult | 9p21.3 | 20716103 | 20716187 | 574444 | <i>MIR491</i>  | 0.2299 | -11.892 |
| adult | 9p21   | 21077103 | 21077962 | 3456   | <i>IFNB1</i>   | 0.2299 | -13.691 |
| adult | 9p22   | 21140630 | 21141900 | 3467   | <i>IFNW1</i>   | 0.2299 | -15.324 |
| adult | 9p22   | 21165635 | 21166659 | 3452   | <i>IFNA21</i>  | 0.2299 | -15.324 |
| adult | 9p22   | 21186617 | 21187598 | 3441   | <i>IFNA4</i>   | 0.2299 | -15.324 |
| adult | 9p22   | 21201467 | 21202204 | 3444   | <i>IFNA7</i>   | 0.2299 | -15.324 |
| adult | 9p22   | 21206179 | 21207142 | 3446   | <i>IFNA10</i>  | 0.2299 | -15.324 |
| adult | 9p22   | 21216371 | 21217310 | 3449   | <i>IFNA16</i>  | 0.2299 | -15.324 |
| adult | 9p22   | 21227241 | 21228221 | 3451   | <i>IFNA17</i>  | 0.2299 | -15.324 |
| adult | 9p22   | 21239200 | 21239978 | 3448   | <i>IFNA14</i>  | 0.2299 | -15.324 |
| adult | 9p22   | 21277686 | 21278562 | 3453   | <i>IFNA22P</i> | 0.2299 | -16.947 |
| adult | 9p22   | 21304612 | 21305312 | 3442   | <i>IFNA5</i>   | 0.2299 | -16.947 |
| adult | 9p24.3 | 213107   | 215893   | 157983 | <i>C9orf66</i> | 0.2975 | -1.8201 |
| adult | 9p22   | 21331017 | 21335429 | 55958  | <i>KLHL9</i>   | 0.2299 | -16.947 |
| adult | 9p22   | 21350316 | 21350886 | 3443   | <i>IFNA6</i>   | 0.2299 | -16.947 |
| adult | 9p22   | 21367370 | 21368075 | 3447   | <i>IFNA13</i>  | 0.2299 | -16.947 |
| adult | 9p22   | 21384253 | 21385396 | 3440   | <i>IFNA2</i>   | 0.2299 | -16.947 |
| adult | 9p22   | 21409145 | 21410184 | 3445   | <i>IFNA8</i>   | 0.2299 | -16.947 |
| adult | 9p22   | 21440452 | 21441315 | 3439   | <i>IFNA1</i>   | 0.2299 | -16.947 |
| adult | 9p21.3 | 21454266 | 21559697 | 554202 | <i>MIR31HG</i> | 0.2299 | -16.947 |
| adult | 9p21.3 | 21480838 | 21482312 | 338376 | <i>IFNE</i>    | 0.2299 | -16.947 |
| adult | 9p24.3 | 214864   | 465259   | 81704  | <i>DOCK8</i>   | 0.2975 | -2.1795 |
| adult | 9p21.3 | 21512113 | 21512184 | 407035 | <i>MIR31</i>   | 0.2299 | -16.947 |

|       |        |          |          |           |                     |         |         |
|-------|--------|----------|----------|-----------|---------------------|---------|---------|
| adult | 9p21   | 21802634 | 21865969 | 4507      | <i>MTAP</i>         | 0.2299  | -17.962 |
| adult | 9p21   | 21967750 | 21974826 | 1029      | <i>CDKN2A</i>       | 0.2299  | -20.459 |
| adult | 9p21.3 | 21994789 | 22077889 | 100048912 | <i>CDKN2B-AS1</i>   | 0.2299  | -25.947 |
| adult | 9p21   | 22002901 | 22009312 | 1030      | <i>CDKN2B</i>       | 0.2299  | -24.375 |
| adult | 9p21.3 | 22446839 | 22452472 | 63951     | <i>DMRTA1</i>       | 0.2299  | -19.838 |
| adult | 9p21   | 23690102 | 23821478 | 1993      | <i>ELAVL2</i>       | 0.3033  | -11.03  |
| adult | 9p21.3 | 24543212 | 24545674 | 100129669 | <i>IZUMO3</i>       | 0.3056  | -9.5736 |
| adult | 9p21.2 | 25676386 | 25678856 | 286319    | <i>TUSC1</i>        | 0.3056  | -6.5622 |
| adult | 9p21.2 | 26066672 | 26118406 | 100506422 | <i>LOC100506422</i> | 0.3056  | -6.5622 |
| adult | 9p24   | 2621792  | 2654485  | 7436      | <i>VLDLR</i>        | 0.2975  | -2.1972 |
| adult | 9p21.2 | 26840682 | 26892826 | 79886     | <i>CAAP1</i>        | 0.3056  | -6.5235 |
| adult | 9p21   | 26903367 | 26947468 | 9373      | <i>PLAA</i>         | 0.3056  | -6.5235 |
| adult | 9p21.2 | 26947036 | 27062931 | 80173     | <i>IFT74</i>        | 0.3056  | -6.2916 |
| adult | 9p21.2 | 26993134 | 27005691 | 64922     | <i>LRRC19</i>       | 0.3056  | -6.2916 |
| adult | 9p21   | 27109138 | 27230176 | 7010      | <i>TEK</i>          | 0.3056  | -4.7229 |
| adult | 9p24.2 | 2717525  | 2730037  | 169522    | <i>KCNV2</i>        | 0.2975  | -2.1972 |
| adult | 9p21   | 27245681 | 27282791 | 158035    | <i>LINC00032</i>    | 0.3056  | -4.7229 |
| adult | 9p21   | 27284653 | 27297137 | 54586     | <i>EQTN</i>         | 0.3056  | -4.7229 |
| adult | 9p21.2 | 27325206 | 27529850 | 79817     | <i>MOB3B</i>        | 0.3056  | -4.7229 |
| adult | 9p21.2 | 27546543 | 27573491 | 203228    | <i>C9orf72</i>      | 0.3056  | -4.2916 |
| adult | 9p21.2 | 27948083 | 28719303 | 158038    | <i>LINGO2</i>       | 0.55805 | -4.7706 |
| adult | 9p24.2 | 2804154  | 2844130  | 9933      | <i>KIAA0020</i>     | 0.2975  | -2.1972 |
| adult | 9p21.1 | 28863623 | 28863704 | 100126310 | <i>MIR876</i>       | 0.2094  | -5.2351 |
| adult | 9p21.1 | 28888876 | 28888953 | 100126316 | <i>MIR873</i>       | 0.2094  | -5.2351 |
| adult | 9p24.2 | 3218296  | 3526001  | 5991      | <i>RFX3</i>         | 0.2975  | -2.1972 |
| adult | 9p21.1 | 32384600 | 32450832 | 48        | <i>ACO1</i>         | 0.2415  | -4.2035 |
| adult | 9p12   | 32455299 | 32526322 | 23586     | <i>DDX58</i>        | 0.2415  | -3.9621 |
| adult | 9p21   | 32540541 | 32552626 | 10210     | <i>TOPORS</i>       | 0.2415  | -3.7308 |
| adult | 9p21.1 | 32551141 | 32553015 | 100129250 | <i>TOPORS-AS1</i>   | 0.2415  | -3.7308 |
| adult | 9p21.1 | 32553523 | 32573182 | 4712      | <i>NDUFB6</i>       | 0.2415  | -3.7308 |
| adult | 9p21.1 | 32629451 | 32635667 | 138474    | <i>TAF1L</i>        | 0.2415  | -3.7308 |
| adult | 9p21.1 | 32783496 | 32789199 | 401498    | <i>TMEM215</i>      | 0.2415  | -3.7308 |
| adult | 9p13.3 | 32972603 | 33001574 | 54840     | <i>APTX</i>         | 0.2415  | -3.7308 |

|       |        |          |          |           |                  |        |         |
|-------|--------|----------|----------|-----------|------------------|--------|---------|
| adult | 9p13.3 | 33025200 | 33039906 | 3301      | <i>DNAJA1</i>    | 0.2415 | -3.7308 |
| adult | 9p12   | 33041849 | 33076714 | 55234     | <i>SMU1</i>      | 0.2415 | -3.7308 |
| adult | 9p13   | 33110638 | 33167356 | 2683      | <i>B4GALT1</i>   | 0.2415 | -3.7308 |
| adult | 9p13.3 | 33240195 | 33248565 | 27290     | <i>SPINK4</i>    | 0.2415 | -3.7308 |
| adult | 9p12   | 33252469 | 33264759 | 573       | <i>BAG1</i>      | 0.2415 | -3.7308 |
| adult | 9p13.3 | 33264876 | 33282067 | 51510     | <i>CHMP5</i>     | 0.2415 | -3.7308 |
| adult | 9p13.3 | 33290417 | 33348721 | 4799      | <i>NFX1</i>      | 0.2415 | -3.7308 |
| adult | 9p13   | 33384947 | 33402517 | 364       | <i>AQP7</i>      | 0.2415 | -3.7308 |
| adult | 9p13   | 33441151 | 33447631 | 360       | <i>AQP3</i>      | 0.2415 | -3.7308 |
| adult | 9p13.3 | 33461350 | 33473941 | 65083     | <i>NOL6</i>      | 0.2415 | -3.7308 |
| adult | 9p13.3 | 33504534 | 33511164 | 441394    | <i>SUGTIP1</i>   | 0.2415 | -3.7308 |
| adult | 9p13.3 | 33524410 | 33573001 | 441459    | <i>ANKRD18B</i>  | 0.2415 | -3.7308 |
| adult | 9p13.3 | 33673501 | 33677418 | 11191     | <i>PTENP1</i>    | 0.2415 | -3.7308 |
| adult | 9p11.2 | 33750463 | 33799229 | 5646      | <i>PRSS3</i>     | 0.2415 | -3.7308 |
| adult | 9p13.3 | 33817181 | 33920401 | 54926     | <i>UBE2R2</i>    | 0.2415 | -3.6133 |
| adult | 9p13.3 | 33921690 | 34048947 | 55833     | <i>UBAP2</i>     | 0.2415 | -3.6133 |
| adult | 9p13.3 | 33934294 | 33934373 | 101340252 | <i>SNORD121B</i> | 0.2415 | -3.6133 |
| adult | 9p13.3 | 33952761 | 33952852 | 100113379 | <i>SNORD121A</i> | 0.2415 | -3.6133 |
| adult | 9p13.3 | 34086380 | 34126771 | 25853     | <i>DCAF12</i>    | 0.2415 | -3.6133 |
| adult | 9p13.3 | 34179002 | 34252521 | 51271     | <i>UBAP1</i>     | 0.2415 | -3.6133 |
| adult | 9p13.3 | 34252377 | 34329198 | 347240    | <i>KIF24</i>     | 0.2415 | -3.6133 |
| adult | 9p13   | 34329503 | 34343711 | 318       | <i>NUDT2</i>     | 0.2415 | -3.6133 |
| adult | 9p13.3 | 34366663 | 34376894 | 57462     | <i>KIAA1161</i>  | 0.2415 | -3.6133 |
| adult | 9p13.3 | 34379016 | 34381598 | 84688     | <i>C9orf24</i>   | 0.2415 | -3.6133 |
| adult | 9p24.3 | 34393    | 35864    | 654835    | <i>FAM138C</i>   | 0.2975 | -1.5045 |
| adult | 9p13.3 | 34398181 | 34458568 | 203259    | <i>FAM219A</i>   | 0.2415 | -3.6133 |
| adult | 9p13.3 | 34458749 | 34520987 | 27019     | <i>DNAI1</i>     | 0.2415 | -3.6133 |
| adult | 9p13.3 | 34521039 | 34523037 | 375704    | <i>ENHO</i>      | 0.2415 | -3.6133 |
| adult | 9p13   | 34551429 | 34589735 | 1271      | <i>CNTFR</i>     | 0.2415 | -3.6133 |
| adult | 9p13.3 | 34610481 | 34612110 | 138716    | <i>RPP25L</i>    | 0.2415 | -3.6133 |
| adult | 9p13   | 34613541 | 34620520 | 11258     | <i>DCTN3</i>     | 0.2415 | -3.6133 |
| adult | 9p13.3 | 34621454 | 34628011 | 138715    | <i>ARID3C</i>    | 0.2415 | -3.6133 |
| adult | 9p13.3 | 34634718 | 34637823 | 10280     | <i>SIGMAR1</i>   | 0.2415 | -3.6133 |

|       |          |          |          |        |                 |        |         |
|-------|----------|----------|----------|--------|-----------------|--------|---------|
| adult | 9p13     | 34646585 | 34650595 | 2592   | <i>GALT</i>     | 0.2415 | -3.6133 |
| adult | 9p13     | 34652181 | 34661898 | 3590   | <i>IL11RA</i>   | 0.2415 | -3.6133 |
| adult | 9p13     | 34661879 | 34662689 | 10850  | <i>CCL27</i>    | 0.2415 | -3.6133 |
| adult | 9p13     | 34689566 | 34691274 | 6363   | <i>CCL19</i>    | 0.2415 | -3.6133 |
| adult | 9p13     | 34709001 | 34710164 | 6366   | <i>CCL21</i>    | 0.2415 | -3.6133 |
| adult | 9p12     | 34723049 | 34729535 | 259308 | <i>FAM205A</i>  | 0.2415 | -3.6133 |
| adult | 9p13.3   | 34958191 | 34982541 | 23349  | <i>KIAA1045</i> | 0.2415 | -3.507  |
| adult | 9p13.3   | 34989637 | 34998430 | 25822  | <i>DNAJB5</i>   | 0.2415 | -3.507  |
| adult | 9p13.3   | 35041091 | 35045988 | 138724 | <i>C9orf131</i> | 0.2415 | -3.507  |
| adult | 9p13.3   | 35056064 | 35072739 | 7415   | <i>VCP</i>      | 0.2415 | -3.507  |
| adult | 9p13     | 35073834 | 35080013 | 2189   | <i>FANCG</i>    | 0.2415 | -3.507  |
| adult | 9p13.3   | 35088684 | 35096546 | 84720  | <i>PIGO</i>     | 0.2415 | -3.507  |
| adult | 9p13.1   | 35099772 | 35103192 | 30968  | <i>STOML2</i>   | 0.2415 | -3.507  |
| adult | 9p13.3   | 35104117 | 35115908 | 80256  | <i>FAM214B</i>  | 0.2415 | -3.507  |
| adult | 9p13.3   | 35161988 | 35405332 | 10497  | <i>UNC13B</i>   | 0.2415 | -3.507  |
| adult | 9p13.3   | 35406751 | 35451105 | 158381 | <i>ATP8B5P</i>  | 0.2415 | -3.507  |
| adult | 9p13.3   | 35489948 | 35561895 | 9853   | <i>RUSC2</i>    | 0.2415 | -3.507  |
| adult | 9p13.3   | 35561826 | 35563896 | 730112 | <i>FAM166B</i>  | 0.2415 | -3.507  |
| adult | 9p13     | 35605280 | 35610038 | 7016   | <i>TESK1</i>    | 0.2415 | -3.1517 |
| adult | 9p13.3   | 35609975 | 35618424 | 971    | <i>CD72</i>     | 0.2415 | -3.1517 |
| adult | 9p13-p12 | 35649296 | 35650947 | 27240  | <i>SIT1</i>     | 0.2415 | -3.4513 |
| adult | 9p13.3   | 35657747 | 35658015 | 6023   | <i>RMRP</i>     | 0.2415 | -3.4513 |
| adult | 9p13.3   | 35658286 | 35661500 | 203260 | <i>CCDC107</i>  | 0.2415 | -3.4513 |
| adult | 9p13.3   | 35659340 | 35665278 | 84904  | <i>ARHGEF39</i> | 0.2415 | -3.4513 |
| adult | 9p13.3   | 35673914 | 35681154 | 768    | <i>CA9</i>      | 0.2415 | -3.4513 |
| adult | 9p13     | 35681989 | 35690053 | 7169   | <i>TPM2</i>     | 0.2415 | -3.4513 |
| adult | 9p13     | 35697333 | 35732392 | 7094   | <i>TLN1</i>     | 0.2415 | -3.4513 |
| adult | 9p13.3   | 35732316 | 35737005 | 10488  | <i>CREB3</i>    | 0.2415 | -3.4513 |
| adult | 9p13.3   | 35736862 | 35749225 | 57704  | <i>GBA2</i>     | 0.2415 | -3.4513 |
| adult | 9p13.3   | 35749276 | 35753264 | 9827   | <i>RGPI</i>     | 0.2415 | -3.4513 |
| adult | 9p13.3   | 35752987 | 35754274 | 692094 | <i>MSMP</i>     | 0.2415 | -3.4513 |
| adult | 9p21-p12 | 35792405 | 35809728 | 4882   | <i>NPR2</i>     | 0.2415 | -3.4513 |
| adult | 9p13.3   | 35807781 | 35812259 | 26206  | <i>SPAG8</i>    | 0.2415 | -3.4513 |

|       |            |          |          |           |                  |         |         |
|-------|------------|----------|----------|-----------|------------------|---------|---------|
| adult | 9p13.3     | 35812956 | 35815042 | 84681     | <i>HINT2</i>     | 0.2415  | -3.4513 |
| adult | 9p13.3     | 35817013 | 35828744 | 392307    | <i>FAM221B</i>   | 0.2415  | -3.4513 |
| adult | 9p13.3     | 35829221 | 35847232 | 51754     | <i>TMEM8B</i>    | 0.2415  | -3.4513 |
| adult | 9p13.3     | 35860270 | 35865515 | 92973     | <i>LINC00950</i> | 0.2415  | -3.4513 |
| adult | 9p13.3     | 35869459 | 35870398 | 392309    | <i>OR13J1</i>    | 0.2415  | -3.4513 |
| adult | 9p13.3     | 35906188 | 35907138 | 646962    | <i>HRCT1</i>     | 0.2415  | -3.4513 |
| adult | 9p13.3     | 35957104 | 35958151 | 56656     | <i>OR2S2</i>     | 0.2415  | -3.3689 |
| adult | 9p13.3     | 36036909 | 36124452 | 8434      | <i>RECK</i>      | 0.2415  | -3.3328 |
| adult | 9p13.3     | 36136532 | 36163910 | 152007    | <i>GLIPR2</i>    | 0.2415  | -3.3328 |
| adult | 9p13.3     | 36169388 | 36171331 | 881       | <i>CCIN</i>      | 0.2415  | -3.3328 |
| adult | 9p13       | 36190852 | 36212059 | 1211      | <i>CLTA</i>      | 0.2415  | -3.3328 |
| adult | 9p13.3     | 36214438 | 36258496 | 10020     | <i>GNE</i>       | 0.2415  | -3.3328 |
| adult | 9p13       | 36336398 | 36400296 | 152006    | <i>RNF38</i>     | 0.27615 | -3.2785 |
| adult | 9p13.2     | 36572858 | 36677680 | 9833      | <i>MELK</i>      | 0.3108  | -3.1289 |
| adult | 9p13       | 36833271 | 37034476 | 5079      | <i>PAX5</i>      | 0.3108  | -2.7055 |
| adult | 9p13.2     | 36864250 | 36864305 | 100616278 | <i>MIR4540</i>   | 0.3108  | -3.1289 |
| adult | 9p13.2     | 37120468 | 37358145 | 84186     | <i>ZCCHC7</i>    | 0.3108  | -2.3249 |
| adult | 9q12       | 37422706 | 37436986 | 9380      | <i>GRHPR</i>     | 0.3108  | -2.6061 |
| adult | 9p13.2     | 37438099 | 37465407 | 9925      | <i>ZBTB5</i>     | 0.3108  | -2.6061 |
| adult | 9p13.2     | 37485931 | 37503694 | 64425     | <i>POLR1E</i>    | 0.3108  | -2.6061 |
| adult | 9p13.2     | 37510888 | 37576250 | 26267     | <i>FBXO10</i>    | 0.3108  | -2.6061 |
| adult | 9p13.2     | 37588411 | 37592636 | 401505    | <i>TOMM5</i>     | 0.3108  | -2.6061 |
| adult | 9p13.2     | 37651051 | 37746901 | 22844     | <i>FRMPD1</i>    | 0.3108  | -2.6061 |
| adult | 9p13.2     | 37753799 | 37778969 | 158234    | <i>TRMT10B</i>   | 0.3108  | -2.6061 |
| adult | 9p11       | 37779710 | 37785089 | 51010     | <i>EXOSC3</i>    | 0.3108  | -2.6061 |
| adult | 9p13.2     | 37800782 | 37867665 | 79269     | <i>DCAF10</i>    | 0.3108  | -2.6061 |
| adult | 9p13.3-p12 | 37877571 | 37904350 | 92014     | <i>SLC25A51</i>  | 0.3108  | -2.3249 |
| adult | 9p13.2     | 37915894 | 38069210 | 6461      | <i>SHB</i>       | 0.3108  | -2.081  |
| adult | 9p24.2     | 3824127  | 4152183  | 169792    | <i>GLIS3</i>     | 0.2975  | -2.1972 |
| adult | 9p11.1     | 38392660 | 38398662 | 219       | <i>ALDH1B1</i>   | 0.3108  | -2.4556 |
| adult | 9p13.1     | 38406524 | 38424444 | 347252    | <i>IGFBPL1</i>   | 0.3108  | -2.4556 |
| adult | 9p13.1     | 38571360 | 38620360 | 253650    | <i>ANKRD18A</i>  | 0.3108  | -2.4556 |
| adult | 9p13.1     | 38621084 | 38623277 | 158228    | <i>FAM201A</i>   | 0.3108  | -2.2544 |

|          |              |           |           |        |                  |         |         |
|----------|--------------|-----------|-----------|--------|------------------|---------|---------|
| adult    | 9p24.2       | 3898645   | 3901248   | 84850  | <i>GLIS3-AS1</i> | 0.2975  | -2.1972 |
| adult    | 9p24         | 4490426   | 4587469   | 6505   | <i>SLC1A1</i>    | 0.2975  | -2.2422 |
| adult    | 9p24.2       | 4598315   | 4666674   | 55064  | <i>SPATA6L</i>   | 0.2975  | -2.2352 |
| adult    | 9p24.1       | 4662293   | 4665272   | 403313 | <i>PPAPDC2</i>   | 0.2975  | -2.2319 |
| adult    | 9p24.1       | 4679552   | 4708398   | 55664  | <i>CDC37L1</i>   | 0.2975  | -2.2319 |
| adult    | 9p24.3       | 470293    | 746106    | 23189  | <i>KANK1</i>     | 0.2975  | -2.1972 |
| adult    | 9p24.1       | 4709556   | 4726227   | 50808  | <i>AK3</i>       | 0.2975  | -2.2319 |
| adult    | 9p24.1-p23   | 4792833   | 4861077   | 10171  | <i>RCL1</i>      | 0.2975  | -2.2319 |
| adult    | 9p24.1       | 4850296   | 4850375   | 406894 | <i>MIR101-2</i>  | 0.2975  | -2.2319 |
| adult    | 9p24         | 4985244   | 5128183   | 3717   | <i>JAK2</i>      | 0.2975  | -2.2319 |
| adult    | 9p24         | 5163862   | 5185618   | 11172  | <i>INSL6</i>     | 0.2975  | -2.2319 |
| adult    | 9p24         | 5231418   | 5233967   | 3641   | <i>INSL4</i>     | 0.2975  | -2.2319 |
| adult    | 9p24.1       | 5299865   | 5304611   | 6019   | <i>RLN2</i>      | 0.2975  | -2.2319 |
| adult    | 9p24.1       | 5334931   | 5339873   | 6013   | <i>RLN1</i>      | 0.2975  | -2.2319 |
| adult    | 9p24.1       | 5357966   | 5437937   | 55848  | <i>PLGRKT</i>    | 0.2975  | -2.2319 |
| adult    | 9p24         | 5450502   | 5470567   | 29126  | <i>CD274</i>     | 0.2975  | -2.2319 |
| adult    | 9p24.2       | 5510544   | 5571282   | 80380  | <i>PDCD1LG2</i>  | 0.2975  | -2.2319 |
| adult    | 9p24         | 5784571   | 5833081   | 79956  | <i>ERMP1</i>     | 0.2975  | -2.2335 |
| adult    | 9p24.1       | 5890908   | 5909822   | 2315   | <i>MLANA</i>     | 0.2975  | -2.2335 |
| adult    | 9p24.1       | 5919007   | 6008003   | 158358 | <i>KIAA2026</i>  | 0.2975  | -2.2599 |
| adult    | 9p24.1       | 6011018   | 6015640   | 26953  | <i>RANBP6</i>    | 0.2975  | -2.2763 |
| adult    | 9p24.1       | 6215785   | 6257983   | 90865  | <i>IL33</i>      | 0.2975  | -2.2663 |
| adult    | 9p24.1       | 6328348   | 6330918   | 89882  | <i>TPD52L3</i>   | 0.2975  | -2.2663 |
| adult    | 9p24.1       | 6413150   | 6507051   | 115426 | <i>UHRF2</i>     | 0.2975  | -2.2663 |
| adult    | 9p22         | 6532463   | 6645692   | 2731   | <i>GLDC</i>      | 0.2975  | -2.2663 |
| adult    | 9p24.1       | 6720862   | 7077264   | 23081  | <i>KDM4C</i>     | 0.2975  | -2.3212 |
| adult    | 9p23-p24.3   | 8314245   | 10612723  | 5789   | <i>PTPRD</i>     | 0.21855 | -2.4888 |
| adult    | 9p24.3       | 841689    | 969090    | 1761   | <i>DMRT1</i>     | 0.2975  | -2.1972 |
| adult    | 9p24.3       | 976967    | 991732    | 58524  | <i>DMRT3</i>     | 0.2975  | -2.1972 |
| children | 1q31.1-q31.2 | 190594019 | 190770788 | 440704 | <i>LOC440704</i> | 1.9155  | -0.2573 |
| children | 1q31.2       | 192127591 | 192154945 | 64407  | <i>RGS18</i>     | 1.8336  | -0.2573 |
| children | 1q31.2       | 192286121 | 192336414 | 431704 | <i>RGS21</i>     | 1.8336  | -0.2573 |
| children | 1q31         | 192544856 | 192549159 | 5996   | <i>RGS1</i>      | 1.8336  | -0.2573 |



|          |              |           |           |        |                  |        |         |
|----------|--------------|-----------|-----------|--------|------------------|--------|---------|
| children | 1q31.2       | 192605267 | 192629440 | 6003   | <i>RGS13</i>     | 1.8336 | -0.2573 |
| children | 1q31         | 192778168 | 192781407 | 5997   | <i>RGS2</i>      | 1.8336 | -0.2573 |
| children | 1q32         | 192981495 | 193028523 | 51377  | <i>UCHL5</i>     | 1.8336 | -0.2573 |
| children | 1q31         | 193028551 | 193055115 | 6738   | <i>TROVE2</i>    | 1.8336 | -0.2573 |
| children | 1q31.2       | 193065594 | 193074608 | 51022  | <i>GLRX2</i>     | 1.8336 | -0.2573 |
| children | 1q25         | 193091087 | 193223942 | 79577  | <i>CDC73</i>     | 1.8336 | -0.2573 |
| children | 1q31         | 193147859 | 193155743 | 8707   | <i>B3GALT2</i>   | 1.8336 | -0.2573 |
| children | 1q31.3       | 196194909 | 196577561 | 343450 | <i>KCNT2</i>     | 1.8269 | -0.2573 |
| children | 1q32         | 196621007 | 196670695 | 3075   | <i>CFH</i>       | 1.8269 | -0.2573 |
| children | 1q32         | 196743929 | 196763203 | 10878  | <i>CFHR3</i>     | 1.8269 | -0.2573 |
| children | 1q32         | 196788860 | 196801319 | 3078   | <i>CFHR1</i>     | 1.8269 | -0.2573 |
| children | 1q32         | 196857143 | 196887843 | 10877  | <i>CFHR4</i>     | 1.5673 | -0.2573 |
| children | 1q31.3       | 196912897 | 196928356 | 3080   | <i>CFHR2</i>     | 1.7968 | -0.2573 |
| children | 1q31.3       | 196946666 | 196978803 | 81494  | <i>CFHR5</i>     | 1.7968 | -0.2573 |
| children | 1q31-q32.1   | 197008320 | 197036397 | 2165   | <i>F13B</i>      | 1.7968 | -0.2573 |
| children | 1q31         | 197053256 | 197115824 | 259266 | <i>ASPM</i>      | 1.7968 | -0.2573 |
| children | 1q31.3       | 197122813 | 197169672 | 360023 | <i>ZBTB41</i>    | 1.7968 | -0.2573 |
| children | 1q31.3       | 197170591 | 197447585 | 23418  | <i>CRB1</i>      | 1.7968 | -0.2573 |
| children | 1q31.3       | 197473878 | 197744623 | 163486 | <i>DENND1B</i>   | 1.7968 | -0.2573 |
| children | 1q31.3       | 197871681 | 197876497 | 388722 | <i>C1orf53</i>   | 1.7968 | -0.2573 |
| children | 1q31.1       | 197881634 | 197899273 | 56956  | <i>LHX9</i>      | 1.7968 | -0.2573 |
| children | 1q31.3       | 198126107 | 198291548 | 140609 | <i>NEK7</i>      | 1.7968 | -0.2573 |
| children | 1q32.2       | 210851656 | 211307457 | 3756   | <i>KCNH1</i>     | 1.3856 | 0       |
| children | 1q32.2       | 211432707 | 211486655 | 55758  | <i>RCOR3</i>     | 1.3856 | 0       |
| children | 1q32         | 211499956 | 211548286 | 7188   | <i>TRAF5</i>     | 1.3856 | 0       |
| children | 1q32.3       | 211556096 | 211605877 | 84791  | <i>LINC00467</i> | 1.3856 | 0       |
| children | 1q32.3       | 211649863 | 211666259 | 343035 | <i>RD3</i>       | 1.3856 | 0       |
| children | 1q32.3       | 211748380 | 211752099 | 7779   | <i>SLC30A1</i>   | 1.3856 | 0       |
| children | 1q32.3       | 211831598 | 211848972 | 4751   | <i>NEK2</i>      | 1.6051 | 0       |
| children | 1q32         | 211916798 | 212004114 | 9926   | <i>LPGAT1</i>    | 1.6051 | 0       |
| children | 1q32.3       | 212113740 | 212209002 | 25896  | <i>INTS7</i>     | 1.6051 | 0       |
| children | 1q32         | 212208894 | 212278348 | 51514  | <i>DTL</i>       | 1.6051 | 0       |
| children | 1q32.2-q32.3 | 212458878 | 212535205 | 5525   | <i>PPP2R5A</i>   | 1.3856 | 0       |

|          |        |           |           |           |                   |        |         |
|----------|--------|-----------|-----------|-----------|-------------------|--------|---------|
| children | 1q32.3 | 212526159 | 212526292 | 692157    | <i>SNORA16B</i>   | 1.3856 | 0       |
| children | 1q32.3 | 212537815 | 212588243 | 55248     | <i>TMEM206</i>    | 1.3856 | 0       |
| children | 1q32.3 | 212606228 | 212619721 | 29937     | <i>NENF</i>       | 1.3856 | 0       |
| children | 1q32.3 | 212738675 | 212794119 | 467       | <i>ATF3</i>       | 1.3856 | 0       |
| children | 1q32.3 | 212797788 | 212800120 | 149647    | <i>FAM71A</i>     | 1.3856 | 0       |
| children | 1q32.3 | 212859758 | 212873327 | 55509     | <i>BATF3</i>      | 1.3856 | 0       |
| children | 1q41   | 212899494 | 212965139 | 25936     | <i>NSL1</i>       | 1.3856 | 0       |
| children | 1q32.3 | 212965169 | 212990167 | 128387    | <i>TATDN3</i>     | 1.3856 | 0       |
| children | 1q32.3 | 213029945 | 213031480 | 642946    | <i>FLVCR1-AS1</i> | 1.3856 | 0       |
| children | 1q32.3 | 213031596 | 213072705 | 28982     | <i>FLVCR1</i>     | 1.3856 | 0       |
| children | 1q32.3 | 213123861 | 213164927 | 79805     | <i>VASH2</i>      | 1.3856 | 0       |
| children | 1q32.3 | 213165523 | 213189217 | 90806     | <i>ANGEL2</i>     | 1.3856 | 0       |
| children | 1q41   | 213224574 | 213446808 | 26750     | <i>RPS6KC1</i>    | 1.3856 | 0       |
| children | 1q32.3 | 214098091 | 214099996 | 100861504 | <i>LINC00538</i>  | 1.3856 | 0       |
| children | 1q41   | 214161277 | 214214847 | 5629      | <i>PROX1</i>      | 1.3856 | 0       |
| children | 1q32.3 | 214454564 | 214510477 | 56950     | <i>SMYD2</i>      | 1.3856 | 0       |
| children | 1q32.2 | 214522038 | 214725024 | 5784      | <i>PTPN14</i>     | 1.3856 | 0       |
| children | 1q41   | 214776531 | 214837914 | 1063      | <i>CENPF</i>      | 1.3856 | 0       |
| children | 1q41   | 215178884 | 215410436 | 3776      | <i>KCNK2</i>      | 1.3856 | 0       |
| children | 1q41   | 215740734 | 215795149 | 51133     | <i>KCTD3</i>      | 1.3856 | 0       |
| children | 1q41   | 215796235 | 216596738 | 7399      | <i>USH2A</i>      | 1.3856 | 0       |
| children | 1q41   | 216676587 | 216896814 | 2104      | <i>ESRRG</i>      | 1.3856 | -0.2856 |
| children | 1q41   | 217600334 | 217804444 | 55105     | <i>GPATCH2</i>    | 1.3856 | -0.2856 |
| children | 1q41   | 217804665 | 218041495 | 128153    | <i>SPATA17</i>    | 1.3856 | -0.2856 |
| children | 1q41   | 218066241 | 218094146 | 100885798 | <i>LINC00210</i>  | 1.3856 | 0       |
| children | 1q41   | 218458628 | 218511325 | 51018     | <i>RRP15</i>      | 1.3856 | 0       |
| children | 1q41   | 218518675 | 218617961 | 7042      | <i>TGFB2</i>      | 1.3856 | 0       |
| children | 1q41   | 219347172 | 219386207 | 127018    | <i>LYPLAL1</i>    | 1.3856 | 0       |
| children | 1p34.1 | 220046618 | 220292777 | 26828     | <i>RNU5F-1</i>    | 1.3856 | 0       |
| children | 1q41   | 220087605 | 220101993 | 55532     | <i>SLC30A10</i>   | 1.3856 | 0       |
| children | 1q41   | 220141941 | 220220000 | 2058      | <i>EPRS</i>       | 1.3856 | 0       |
| children | 1q41   | 220230823 | 220263195 | 10380     | <i>BPNT1</i>      | 1.3856 | 0       |
| children | 1q41   | 220267454 | 220321383 | 55699     | <i>IARS2</i>      | 1.3856 | 0       |

|          |              |           |           |           |                   |         |         |
|----------|--------------|-----------|-----------|-----------|-------------------|---------|---------|
| children | 1q41         | 220291194 | 220291304 | 406997    | <i>MIR215</i>     | 1.3856  | 0       |
| children | 1q41         | 220291498 | 220291583 | 406969    | <i>MIR194-1</i>   | 1.3856  | 0       |
| children | 1q41         | 220321609 | 220445843 | 25782     | <i>RAB3GAP2</i>   | 1.3856  | 0       |
| children | 1q41         | 220373887 | 220374018 | 677818    | <i>SNORA36B</i>   | 1.3856  | 0       |
| children | 1q41         | 220439520 | 220441057 | 6791      | <i>AURKAPS1</i>   | 1.3856  | 0       |
| children | 1q42.2       | 232533711 | 232651354 | 57568     | <i>SIPAIL2</i>    | 1.3649  | 0       |
| children | 1q42.2       | 232940637 | 232946092 | 54627     | <i>MAP10</i>      | 1.3649  | 0       |
| children | 1q42.2       | 233086369 | 233114219 | 84284     | <i>NTPCR</i>      | 1.3649  | 0       |
| children | 1q42.2       | 233119881 | 233431459 | 80003     | <i>PCNXL2</i>     | 1.3649  | 0       |
| children | 1q42         | 233463513 | 233520894 | 84451     | <i>KIAA1804</i>   | 1.3649  | 0       |
| children | 1q42-q43     | 233749749 | 233808258 | 3775      | <i>KCNK1</i>      | 1.3649  | -0.3122 |
| children | 1q42.2       | 234040457 | 234460264 | 148641    | <i>SLC35F3</i>    | 1.56375 | -0.3194 |
| children | 1q42.2       | 234509182 | 234519795 | 388753    | <i>COA6</i>       | 1.5686  | -0.3265 |
| children | 1q42.3       | 234527058 | 234614849 | 6894      | <i>TARBP1</i>     | 1.5681  | -0.3265 |
| children | 1q42.3       | 234740014 | 234745271 | 359948    | <i>IRF2BP2</i>    | 1.5676  | -0.3265 |
| children | 1q42.3       | 234765056 | 234770526 | 100302691 | <i>LINC00184</i>  | 1.5676  | -0.3265 |
| children | 1q42         | 235272657 | 235292256 | 9804      | <i>TOMM20</i>     | 1.5676  | -0.3258 |
| children | 1q42.3       | 235291117 | 235291252 | 677802    | <i>SNORA14B</i>   | 1.5676  | -0.3258 |
| children | 1q42.3       | 235294497 | 235324571 | 23029     | <i>RBM34</i>      | 1.5676  | -0.3258 |
| children | 1q42.3       | 235330209 | 235490802 | 51742     | <i>ARID4B</i>     | 1.5676  | -0.3258 |
| children | 1q43         | 235491752 | 235507844 | 9453      | <i>GGPS1</i>      | 1.5676  | -0.3258 |
| children | 1q42.3       | 235530674 | 235612283 | 6905      | <i>TBCE</i>       | 1.5676  | -0.3258 |
| children | 1q42.3       | 235610504 | 235667781 | 148789    | <i>B3GALNT2</i>   | 1.5676  | -0.3258 |
| children | 1q42.3       | 235710984 | 235813293 | 2786      | <i>GNG4</i>       | 1.5676  | -0.3258 |
| children | 1q42.1-q42.2 | 235824330 | 236030227 | 1130      | <i>LYST</i>       | 1.5676  | -0.3258 |
| children | 1q43         | 236139131 | 236228481 | 4811      | <i>NID1</i>       | 1.5676  | -0.3258 |
| children | 1q42-q43     | 236305831 | 236372209 | 7107      | <i>GPR137B</i>    | 1.5676  | -0.3258 |
| children | 1q42.2-q43   | 236378421 | 236445339 | 56605     | <i>ERO1LB</i>     | 1.5676  | -0.3258 |
| children | 1q42.3       | 236557679 | 236648008 | 128178    | <i>EDARADD</i>    | 1.5676  | -0.3311 |
| children | 1q43         | 236681513 | 236716279 | 3964      | <i>LGALS8</i>     | 1.5676  | -0.3311 |
| children | 1q43         | 236686368 | 236687808 | 100287902 | <i>LGALS8-AS1</i> | 1.5676  | -0.3311 |
| children | 1q43         | 236712304 | 236767841 | 55127     | <i>HEATR1</i>     | 1.5676  | -0.3311 |
| children | 1q42-q43     | 236849753 | 236927927 | 88        | <i>ACTN2</i>      | 1.5676  | -0.3311 |

|          |          |           |           |           |                     |        |         |
|----------|----------|-----------|-----------|-----------|---------------------|--------|---------|
| children | 1q43     | 236958580 | 237067281 | 4548      | <i>MTR</i>          | 1.5676 | -0.3311 |
| children | 1q43     | 237167402 | 237167718 | 645745    | <i>MT1HL1</i>       | 1.5676 | -0.3311 |
| children | 1q43     | 237205701 | 237997288 | 6262      | <i>RYR2</i>         | 1.5676 | -0.3311 |
| children | 1q43     | 238025474 | 238091619 | 100130331 | <i>LOC100130331</i> | 1.5676 | -0.3311 |
| children | 1q43     | 238041163 | 238054222 | 57829     | <i>ZP4</i>          | 1.5676 | -0.3311 |
| children | 1q43     | 239792372 | 240072717 | 1131      | <i>CHRM3</i>        | 1.5676 | -0.3311 |
| children | 1q43     | 240170823 | 240176560 | 645884    | <i>RPS7P5</i>       | 1.5676 | -0.3311 |
| children | 1q43     | 240255184 | 240638489 | 56776     | <i>FMN2</i>         | 1.5622 | -0.3311 |
| children | 1q43     | 240652872 | 240775462 | 64388     | <i>GREM2</i>        | 1.5568 | -0.3311 |
| children | 1q43     | 240938813 | 241520530 | 6000      | <i>RGS7</i>         | 1.3548 | 0       |
| children | 1q42.1   | 241660856 | 241683085 | 2271      | <i>FH</i>           | 1.3548 | 0       |
| children | 1q42-q44 | 241695433 | 241758949 | 8564      | <i>KMO</i>          | 1.3548 | 0       |
| children | 1q43     | 241756451 | 241803701 | 23596     | <i>OPN3</i>         | 1.3548 | 0       |
| children | 1q43     | 241792166 | 241799232 | 1122      | <i>CHML</i>         | 1.3548 | 0       |
| children | 1q43     | 241815579 | 241965434 | 128025    | <i>WDR64</i>        | 1.3548 | 0       |
| children | 1q43     | 242011492 | 242053241 | 9156      | <i>EXO1</i>         | 1.3548 | 0       |
| children | 1q43     | 242158791 | 242162385 | 440738    | <i>MAP1LC3C</i>     | 1.3548 | 0       |
| children | 1q43     | 242251688 | 242612784 | 200150    | <i>PLD5</i>         | 1.3548 | 0       |
| children | 1q44     | 243287729 | 243418708 | 9859      | <i>CEP170</i>       | 1.3548 | 0       |
| children | 1q43     | 243419306 | 243663393 | 10806     | <i>SDCCAG8</i>      | 1.3548 | 0       |
| children | 1q44     | 243651534 | 244006584 | 10000     | <i>AKT3</i>         | 1.3548 | 0       |
| children | 1q44     | 244080703 | 244210619 | 339529    | <i>LOC339529</i>    | 1.3548 | 0       |
| children | 1q44     | 244212240 | 244220780 | 10472     | <i>ZBTB18</i>       | 1.3548 | 0       |
| children | 1q44     | 244515936 | 244552388 | 200159    | <i>C1orf100</i>     | 1.3548 | 0       |
| children | 1q44     | 244571793 | 244615436 | 159       | <i>ADSS</i>         | 1.3548 | 0       |
| children | 1q44     | 244624672 | 244803662 | 257044    | <i>C1orf101</i>     | 1.3548 | 0       |
| children | 1q44     | 244816349 | 244872336 | 51029     | <i>DESI2</i>        | 1.3548 | 0       |
| children | 1q44     | 244998630 | 245008365 | 116228    | <i>COX20</i>        | 1.3548 | 0       |
| children | 1q44     | 245013601 | 245027827 | 3192      | <i>HNRNPU</i>       | 1.3548 | 0       |
| children | 1q44     | 245133170 | 245251148 | 84288     | <i>EFCAB2</i>       | 1.3548 | 0       |
| children | 1q44     | 245318286 | 245866428 | 55083     | <i>KIF26B</i>       | 1.3548 | 0       |
| children | 1q44     | 245912641 | 246580714 | 64754     | <i>SMYD3</i>        | 1.3548 | 0       |
| children | 1q44     | 246679340 | 246687589 | 255654    | <i>LOC255654</i>    | 1.3548 | 0       |

|          |      |           |           |           |                      |        |   |
|----------|------|-----------|-----------|-----------|----------------------|--------|---|
| children | 1q44 | 246703862 | 246729565 | 64216     | <i>TFB2M</i>         | 1.3548 | 0 |
| children | 1q44 | 246729638 | 246811544 | 163882    | <i>CNST</i>          | 1.3548 | 0 |
| children | 1q44 | 246887377 | 246931440 | 51097     | <i>SCCPDH</i>        | 1.3548 | 0 |
| children | 1q44 | 247002401 | 247094726 | 25909     | <i>AHCTF1</i>        | 1.3548 | 0 |
| children | 1q44 | 247108848 | 247171395 | 57116     | <i>ZNF695</i>        | 1.3548 | 0 |
| children | 1q   | 247108848 | 247242115 | 100533111 | <i>ZNF670-ZNF695</i> | 1.3548 | 0 |
| children | 1q44 | 247197939 | 247242115 | 93474     | <i>ZNF670</i>        | 1.3548 | 0 |
| children | 1q44 | 247263263 | 247267674 | 79862     | <i>ZNF669</i>        | 1.3548 | 0 |
| children | 1q44 | 247273461 | 247275719 | 388759    | <i>C1orf229</i>      | 1.3548 | 0 |
| children | 1q44 | 247285276 | 247335319 | 7678      | <i>ZNF124</i>        | 1.3548 | 0 |
| children | 1q44 | 247419373 | 247420447 | 317705    | <i>VN1R5</i>         | 1.3548 | 0 |
| children | 1q44 | 247463621 | 247495045 | 84838     | <i>ZNF496</i>        | 1.3548 | 0 |
| children | 1q44 | 247579457 | 247612406 | 114548    | <i>NLRP3</i>         | 1.3548 | 0 |
| children | 1q44 | 247614330 | 247615284 | 127623    | <i>OR2B11</i>        | 1.3548 | 0 |
| children | 1q44 | 247654369 | 247655711 | 441932    | <i>OR2W5</i>         | 1.3548 | 0 |
| children | 1q44 | 247687980 | 247694106 | 148824    | <i>GCSAML-ASI</i>    | 1.3548 | 0 |
| children | 1q44 | 247693433 | 247697141 | 81472     | <i>OR2C3</i>         | 1.3548 | 0 |
| children | 1q44 | 247712346 | 247740992 | 148823    | <i>GCSAML</i>        | 1.3548 | 0 |
| children | 1q44 | 247751661 | 247752615 | 81470     | <i>OR2G2</i>         | 1.3548 | 0 |
| children | 1q44 | 247768887 | 247769817 | 81469     | <i>OR2G3</i>         | 1.3548 | 0 |
| children | 1q44 | 247835419 | 247836343 | 441933    | <i>OR13G1</i>        | 1.3548 | 0 |
| children | 1q44 | 247875130 | 247876057 | 343169    | <i>OR6F1</i>         | 1.3548 | 0 |
| children | 1q44 | 247920763 | 247921708 | 26188     | <i>OR1C1</i>         | 1.3548 | 0 |
| children | 1q44 | 247978101 | 247979031 | 284532    | <i>OR14A16</i>       | 1.3548 | 0 |
| children | 1q44 | 248004229 | 248005198 | 391189    | <i>OR11L1</i>        | 1.3548 | 0 |
| children | 1q44 | 248020500 | 248043438 | 25893     | <i>TRIM58</i>        | 1.3548 | 0 |
| children | 1q44 | 248084319 | 248085258 | 343172    | <i>OR2T8</i>         | 1.3548 | 0 |
| children | 1q44 | 248100330 | 248264224 | 284521    | <i>OR2L13</i>        | 1.3548 | 0 |
| children | 1q44 | 248112159 | 248113098 | 391190    | <i>OR2L8</i>         | 1.3548 | 0 |
| children | 1q44 | 248128633 | 248129641 | 391191    | <i>OR2AK2</i>        | 1.3548 | 0 |
| children | 1q44 | 248153568 | 248154493 | 26247     | <i>OR2LIP</i>        | 1.3548 | 0 |
| children | 1q44 | 248185249 | 248186188 | 81466     | <i>OR2L5</i>         | 1.3548 | 0 |
| children | 1q44 | 248201473 | 248202607 | 26246     | <i>OR2L2</i>         | 1.3548 | 0 |

|          |               |           |           |           |                    |        |         |
|----------|---------------|-----------|-----------|-----------|--------------------|--------|---------|
| children | 1q44          | 248223983 | 248224922 | 391192    | <i>OR2L3</i>       | 1.3548 | 0       |
| children | 1q44          | 248285437 | 248286082 | 388762    | <i>OR2M1P</i>      | 1.3548 | 0       |
| children | 1q44          | 248308449 | 248309388 | 127059    | <i>OR2M5</i>       | 1.3548 | 0       |
| children | 1q44          | 248343287 | 248344331 | 391194    | <i>OR2M2</i>       | 1.3548 | 0       |
| children | 1q44          | 248366369 | 248367308 | 127062    | <i>OR2M3</i>       | 1.3548 | 0       |
| children | 1q44          | 248402230 | 248403166 | 26245     | <i>OR2M4</i>       | 1.3548 | 0       |
| children | 1q44          | 248436153 | 248437116 | 391195    | <i>OR2T33</i>      | 1.3548 | 0       |
| children | 1q44          | 248457917 | 248458880 | 127064    | <i>OR2T12</i>      | 1.3548 | 0       |
| children | 1q44          | 248486931 | 248487870 | 391196    | <i>OR2M7</i>       | 1.3548 | 0       |
| children | 1q44          | 248512076 | 248513015 | 127066    | <i>OR14C36</i>     | 1.3548 | 0       |
| children | 1q44          | 248524882 | 248525929 | 127074    | <i>OR2T4</i>       | 1.3548 | 0       |
| children | 1q44          | 248550909 | 248551836 | 254879    | <i>OR2T6</i>       | 1.3548 | 0       |
| children | 1q44          | 248569295 | 248570405 | 26696     | <i>OR2T1</i>       | 1.3548 | 0       |
| children | 1q44          | 248616098 | 248617073 | 401992    | <i>OR2T2</i>       | 1.3548 | 0       |
| children | 12p13-p12     | 10004967  | 10022458  | 9976      | <i>CLEC2B</i>      | 0      | -2.3863 |
| children | 12p13         | 10034087  | 10048432  | 100431172 | <i>KLRF2</i>       | 0      | -2.3863 |
| children | 12p13.31      | 10065825  | 10084980  | 387836    | <i>CLEC2A</i>      | 0      | -2.3863 |
| children | 12p13.2       | 10103914  | 10138194  | 160364    | <i>CLEC12A</i>     | 0      | -2.3863 |
| children | 12p13.2       | 10145661  | 10151899  | 51266     | <i>CLEC1B</i>      | 0      | -2.3863 |
| children | 12p13.2       | 10163230  | 10170548  | 387837    | <i>CLEC12B</i>     | 0      | -2.3863 |
| children | 12p13.2       | 10183275  | 10218629  | 283420    | <i>CLEC9A</i>      | 0      | -2.3863 |
| children | 12p13.2       | 10222152  | 10251664  | 51267     | <i>CLEC1A</i>      | 0      | -2.3863 |
| children | 12p13.2       | 10269375  | 10282868  | 64581     | <i>CLEC7A</i>      | 0      | -2.3863 |
| children | 12p13.2-p12.3 | 10310898  | 10324790  | 4973      | <i>OLRI</i>        | 0      | -2.3863 |
| children | 12p13.2       | 10331556  | 10344403  | 120939    | <i>TMEM52B</i>     | 0      | -2.3863 |
| children | 12p13.2       | 10365488  | 10375724  | 23710     | <i>GABARAPLI</i>   | 0      | -2.3863 |
| children | 12p13         | 10457049  | 10469850  | 3824      | <i>KLRD1</i>       | 0      | -2.3863 |
| children | 12p13.2-p12.3 | 10524951  | 10542653  | 22914     | <i>KLRK1</i>       | 0      | -2.3863 |
| children | 12p           | 10524951  | 10562745  | 100528032 | <i>KLRC4-KLRK1</i> | 0      | -2.3863 |
| children | 12p13.2-p12.3 | 10559982  | 10562356  | 8302      | <i>KLRC4</i>       | 0      | -2.3863 |
| children | 12p13         | 10564913  | 10573194  | 3823      | <i>KLRC3</i>       | 0      | -2.3863 |
| children | 12p13         | 10583205  | 10588592  | 3822      | <i>KLRC2</i>       | 0      | -2.3863 |
| children | 12p13         | 10598637  | 10605979  | 3821      | <i>KLRC1</i>       | 0      | -2.3863 |

|          |           |          |          |           |                  |   |         |
|----------|-----------|----------|----------|-----------|------------------|---|---------|
| children | 12p13.2   | 10741076 | 10752434 | 10748     | <i>KLRAP1</i>    | 0 | -2.3863 |
| children | 12p13.2   | 10756363 | 10766208 | 55110     | <i>MAGOHB</i>    | 0 | -2.3863 |
| children | 12p13.2   | 10771537 | 10826891 | 55359     | <i>STYK1</i>     | 0 | -2.3863 |
| children | 12p13.1   | 10851675 | 10875953 | 8531      | <i>YBX3</i>      | 0 | -2.3863 |
| children | 12p13     | 10954130 | 10955226 | 50837     | <i>TAS2R7</i>    | 0 | -2.3863 |
| children | 12p13     | 10958649 | 10959579 | 50836     | <i>TAS2R8</i>    | 0 | -2.3863 |
| children | 12p13     | 10961692 | 10962767 | 50835     | <i>TAS2R9</i>    | 0 | -2.3863 |
| children | 12p13     | 10977944 | 10978868 | 50839     | <i>TAS2R10</i>   | 0 | -2.3863 |
| children | 12p13     | 10998447 | 11002075 | 11272     | <i>PRR4</i>      | 0 | -2.3863 |
| children | 12p       | 10998447 | 11324224 | 100533464 | <i>PRH1-PRR4</i> | 0 | -2.3936 |
| children | 12p13.3   | 1100373  | 1605099  | 23085     | <i>ERC1</i>      | 0 | -1.0903 |
| children | 12p13     | 11060524 | 11062161 | 50838     | <i>TAS2R13</i>   | 0 | -2.3863 |
| children | 12p13.2   | 11081834 | 11087444 | 5555      | <i>PRH2</i>      | 0 | -2.3863 |
| children | 12p13     | 11090852 | 11091806 | 50840     | <i>TAS2R14</i>   | 0 | -2.3863 |
| children | 12p13.2   | 11138511 | 11139511 | 259296    | <i>TAS2R50</i>   | 0 | -2.3863 |
| children | 12p13.2   | 11148560 | 11150474 | 259295    | <i>TAS2R20</i>   | 0 | -2.3863 |
| children | 12p13.2   | 11174217 | 11175219 | 259294    | <i>TAS2R19</i>   | 0 | -2.3863 |
| children | 12p13.2   | 11182985 | 11184006 | 259290    | <i>TAS2R31</i>   | 0 | -2.3863 |
| children | 12p13.2   | 11213963 | 11214893 | 259292    | <i>TAS2R46</i>   | 0 | -2.091  |
| children | 12p13.2   | 11243885 | 11244912 | 259289    | <i>TAS2R43</i>   | 0 | -2.091  |
| children | 12p13.2   | 11285883 | 11286843 | 259293    | <i>TAS2R30</i>   | 0 | -2.4008 |
| children | 12p13     | 11338598 | 11339543 | 353164    | <i>TAS2R42</i>   | 0 | -2.4008 |
| children | 12p13.2   | 11418846 | 11422641 | 5544      | <i>PRB3</i>      | 0 | -2.4008 |
| children | 12p13.2   | 11460014 | 11463369 | 5545      | <i>PRB4</i>      | 0 | -2.4008 |
| children | 12p13.2   | 11504756 | 11508524 | 5542      | <i>PRB1</i>      | 0 | -2.4008 |
| children | 12p13.2   | 11544473 | 11548498 | 653247    | <i>PRB2</i>      | 0 | -2.4008 |
| children | 12p13     | 11802787 | 12048325 | 2120      | <i>ETV6</i>      | 0 | -2.8575 |
| children | 12p13-p12 | 12223877 | 12252627 | 79370     | <i>BCL2L14</i>   | 0 | -2.2088 |
| children | 12p13.2   | 12268960 | 12419811 | 4040      | <i>LRP6</i>      | 0 | -2.2088 |
| children | 12p13.2   | 12482217 | 12503169 | 54682     | <i>MANSC1</i>    | 0 | -2.2088 |
| children | 12p13.2   | 12508341 | 12510001 | 503693    | <i>LOH12CR2</i>  | 0 | -2.2088 |
| children | 12p12     | 12510012 | 12619838 | 118426    | <i>LOH12CR1</i>  | 0 | -2.2088 |
| children | 12p13     | 12626215 | 12715448 | 80824     | <i>DUSP16</i>    | 0 | -2.2088 |

|          |               |          |          |        |                  |   |         |
|----------|---------------|----------|----------|--------|------------------|---|---------|
| children | 12p13         | 12764766 | 12798042 | 1389   | <i>CREBL2</i>    | 0 | -2.2088 |
| children | 12p12.3       | 12813994 | 12849121 | 2842   | <i>GPR19</i>     | 0 | -2.2088 |
| children | 12p13.1-p12   | 12870203 | 12875316 | 1027   | <i>CDKN1B</i>    | 0 | -2.2088 |
| children | 12p13.1       | 12878850 | 12944399 | 81575  | <i>APOLD1</i>    | 0 | -2.2088 |
| children | 12p13.1       | 12917582 | 12917677 | 693198 | <i>MIR613</i>    | 0 | -2.2088 |
| children | 12p13.1       | 12966279 | 12982915 | 51202  | <i>DDX47</i>     | 0 | -2.2088 |
| children | 12p13.1       | 13028410 | 13029070 | 387841 | <i>RPL13AP20</i> | 0 | -2.2088 |
| children | 12p13.1       | 13043955 | 13066600 | 9052   | <i>GPRC5A</i>    | 0 | -2.2088 |
| children | 12p13.1       | 13068762 | 13068852 | 693199 | <i>MIR614</i>    | 0 | -2.2088 |
| children | 12p13.3       | 13093708 | 13103318 | 55507  | <i>GPRC5D</i>    | 0 | -2.2088 |
| children | 12p13.1       | 13127798 | 13153243 | 50865  | <i>HEBP1</i>     | 0 | -2.2088 |
| children | 12p13.1       | 13153375 | 13157764 | 93164  | <i>HTR7P1</i>    | 0 | -2.2088 |
| children | 12p13.1       | 13197314 | 13236383 | 57613  | <i>KIAA1467</i>  | 0 | -2.2088 |
| children | 12p13.1       | 13236470 | 13248740 | 83445  | <i>GSG1</i>      | 0 | -2.2088 |
| children | 12p12.3       | 13349601 | 13369708 | 2012   | <i>EMP1</i>      | 0 | -2.2088 |
| children | 12p12         | 13714409 | 14133022 | 2904   | <i>GRIN2B</i>    | 0 | -2.2088 |
| children | 12p13.1       | 14518565 | 14655869 | 55729  | <i>ATF7IP</i>    | 0 | -2.6086 |
| children | 12p13.1       | 14656596 | 14720791 | 79887  | <i>PLBD1</i>     | 0 | -2.6086 |
| children | 12p12         | 14765567 | 14849519 | 2984   | <i>GUCY2C</i>    | 0 | -2.6086 |
| children | 12p12.3       | 14923653 | 14924065 | 121504 | <i>HIST4H4</i>   | 0 | -2.6086 |
| children | 12p12.3       | 14927269 | 14930936 | 55766  | <i>H2AFJ</i>     | 0 | -2.6086 |
| children | 12p12.3       | 14939411 | 14956401 | 51729  | <i>WBP11</i>     | 0 | -2.6086 |
| children | 12p12.3       | 14956505 | 14976791 | 144608 | <i>C12orf60</i>  | 0 | -2.6086 |
| children | 12p12.3       | 14957583 | 14967116 | 440087 | <i>SMCO3</i>     | 0 | -2.6086 |
| children | 12p13-p12     | 14982244 | 14996413 | 420    | <i>ART4</i>      | 0 | -2.6086 |
| children | 12p12.3       | 15034114 | 15038853 | 4256   | <i>MGP</i>       | 0 | -2.6086 |
| children | 12p12.3       | 15066960 | 15091483 | 121506 | <i>ERP27</i>     | 0 | -2.6086 |
| children | 12p12.3       | 15094949 | 15114562 | 397    | <i>ARHGDI3</i>   | 0 | -2.6086 |
| children | 12p13         | 15125955 | 15134799 | 5149   | <i>PDE6H</i>     | 0 | -2.6086 |
| children | 12p12.3       | 15260715 | 15374411 | 85004  | <i>RERG</i>      | 0 | -2.175  |
| children | 12p13.3-p13.2 | 15475190 | 15751265 | 5800   | <i>PTPRO</i>     | 0 | -1.7809 |
| children | 12p12.3       | 15773074 | 15942510 | 2059   | <i>EPS8</i>      | 0 | -1.7809 |
| children | 12p12.3       | 16035287 | 16056410 | 11171  | <i>STRAP</i>     | 0 | -1.7809 |



|          |               |          |          |           |                     |   |         |
|----------|---------------|----------|----------|-----------|---------------------|---|---------|
| children | 12p12.3       | 16064105 | 16190315 | 51071     | <i>DERA</i>         | 0 | -1.7809 |
| children | 12p13         | 1609656  | 1613590  | 100292680 | <i>LINC00942</i>    | 0 | -1.1266 |
| children | 12p12.3       | 16341418 | 16430619 | 729025    | <i>SLC15A5</i>      | 0 | -1.5383 |
| children | 12p12.3-p12.1 | 16500075 | 16517344 | 4257      | <i>MGST1</i>        | 0 | -1.5628 |
| children | 12p12.3       | 16701305 | 16758313 | 55885     | <i>LMO3</i>         | 0 | -1.5628 |
| children | 12p12.3       | 17141680 | 17143562 | 728622    | <i>SKIP2</i>        | 0 | -1.5628 |
| children | 12p13.31      | 1800246  | 1897845  | 79602     | <i>ADIPOR2</i>      | 0 | -1.121  |
| children | 12p12.3       | 18233802 | 18243127 | 79785     | <i>RERGL</i>        | 0 | -1.5838 |
| children | 12p12         | 18414473 | 18801352 | 5288      | <i>PIK3C2G</i>      | 0 | -1.5838 |
| children | 12p12.3       | 18836109 | 18890993 | 89869     | <i>PLCZ1</i>        | 0 | -1.5838 |
| children | 12p12.3       | 18891044 | 18892122 | 93661     | <i>CAPZA3</i>       | 0 | -1.5838 |
| children | 12p13.33      | 1901122  | 2027870  | 93589     | <i>CACNA2D4</i>     | 0 | -1.121  |
| children | 12p12         | 19282625 | 19354937 | 54477     | <i>PLEKHA5</i>      | 0 | -1.5838 |
| children | 12p13.33      | 1929432  | 1945918  | 654429    | <i>LRTM2</i>        | 0 | -1.121  |
| children | 12p12.3       | 19592607 | 19675173 | 121536    | <i>AEBP2</i>        | 0 | -1.5838 |
| children | 12p12         | 20167618 | 20251802 | 100506393 | <i>LOC100506393</i> | 0 | -1.5838 |
| children | 12p12         | 20522178 | 20837041 | 5139      | <i>PDE3A</i>        | 0 | -1.5838 |
| children | 12p13.33      | 2055213  | 2113677  | 196513    | <i>DCP1B</i>        | 0 | -1.121  |
| children | 12p12.2       | 20848288 | 20906320 | 53919     | <i>SLCO1C1</i>      | 0 | -1.5838 |
| children | 12p12         | 20963637 | 21069843 | 28234     | <i>SLCO1B3</i>      | 0 | -1.5838 |
| children | 12p12.2       | 21168629 | 21243040 | 338821    | <i>SLCO1B7</i>      | 0 | -1.1957 |
| children | 12p           | 21284127 | 21392730 | 10599     | <i>SLCO1B1</i>      | 0 | -1.1957 |
| children | 12p12         | 21417533 | 21487832 | 6579      | <i>SLCO1A2</i>      | 0 | -1.1957 |
| children | 12p12.1       | 21525801 | 21532914 | 3375      | <i>IAPP</i>         | 0 | -1.1957 |
| children | 12p12.1       | 21590537 | 21624182 | 79912     | <i>PYROXD1</i>      | 0 | -1.1957 |
| children | 12p12         | 21621843 | 21654603 | 5965      | <i>RECQL</i>        | 0 | -1.1957 |
| children | 12p13.3       | 2162415  | 2807115  | 775       | <i>CACNA1C</i>      | 0 | -1.1104 |
| children | 12p12.1       | 21654698 | 21671337 | 51026     | <i>GOLT1B</i>       | 0 | -1.1957 |
| children | 12p12.2       | 21689122 | 21757781 | 2998      | <i>GYS2</i>         | 0 | -1.1957 |
| children | 12p12.2-p12.1 | 21788275 | 21810728 | 3945      | <i>LDHB</i>         | 0 | -1.1957 |
| children | 12p11.23      | 21917888 | 21927755 | 3764      | <i>KCNJ8</i>        | 0 | -1.1957 |
| children | 12p12.1       | 21950323 | 22089628 | 10060     | <i>ABCC9</i>        | 0 | -1.1957 |
| children | 12p12.1       | 22199109 | 22218606 | 55907     | <i>CMAS</i>         | 0 | -1.1957 |

|          |               |          |          |           |                  |   |         |
|----------|---------------|----------|----------|-----------|------------------|---|---------|
| children | 12p12.1-p11.2 | 22346324 | 22487648 | 6489      | <i>ST8SIA1</i>   | 0 | -1.1957 |
| children | 12p12.1       | 22601479 | 22697480 | 9847      | <i>C2CD5</i>     | 0 | -1.1957 |
| children | 12p12.1       | 22778075 | 22797349 | 55500     | <i>ETNK1</i>     | 0 | -1.1957 |
| children | 12p12.1       | 23685230 | 23737546 | 6660      | <i>SOX5</i>      | 0 | -1.1318 |
| children | 12p12.1       | 24365354 | 24365429 | 100126320 | <i>MIR920</i>    | 0 | -1.2974 |
| children | 12p12.1       | 24719897 | 24737102 | 144360    | <i>LINC00477</i> | 0 | -1.2974 |
| children | 12p12.1       | 24962957 | 25055322 | 586       | <i>BCAT1</i>     | 0 | -1.2974 |
| children | 12p12.1       | 25146364 | 25150373 | 196415    | <i>C12orf77</i>  | 0 | -1.2974 |
| children | 12p12.1       | 25205180 | 25261269 | 4033      | <i>LRMP</i>      | 0 | -1.0678 |
| children | 12p12.1       | 25261222 | 25348094 | 55259     | <i>CASCI</i>     | 0 | -1.0678 |
| children | 12p12.1       | 25348149 | 25357949 | 144363    | <i>LYRM5</i>     | 0 | -1.0678 |
| children | 12p12.1       | 25357722 | 25403865 | 3845      | <i>KRAS</i>      | 0 | -1.0678 |
| children | 12p12.3       | 26111963 | 26225807 | 11228     | <i>RASSF8</i>    | 0 | -1.0678 |
| children | 12p12.1       | 26272958 | 26278003 | 79365     | <i>BHLHE41</i>   | 0 | -1.0678 |
| children | 12p11.2       | 26348268 | 26387708 | 8082      | <i>SSPN</i>      | 0 | -1.0678 |
| children | 12p11         | 26488269 | 26986131 | 3709      | <i>ITPR2</i>     | 0 | -1.0678 |
| children | 12p11.23      | 27058111 | 27091254 | 55726     | <i>ASUN</i>      | 0 | -1.0678 |
| children | 12p11.23      | 27091304 | 27113679 | 26127     | <i>FGFR1OP2</i>  | 0 | -1.0678 |
| children | 12q11-q12     | 27124505 | 27167339 | 51768     | <i>TM7SF3</i>    | 0 | -1.0678 |
| children | 12p11.23      | 27175454 | 27183606 | 9412      | <i>MED21</i>     | 0 | -1.0678 |
| children | 12p11.23      | 27233989 | 27235455 | 728858    | <i>C12orf71</i>  | 0 | -1.0678 |
| children | 12p11.23      | 27397077 | 27478890 | 23012     | <i>STK38L</i>    | 0 | -1.0678 |
| children | 12p12.2-p11.2 | 27485786 | 27578746 | 56938     | <i>ARNTL2</i>    | 0 | -1.0678 |
| children | 12p11.23      | 27619742 | 27655118 | 341346    | <i>SMCO2</i>     | 0 | -1.0678 |
| children | 12p12.1       | 27677044 | 27848497 | 8496      | <i>PPFIBP1</i>   | 0 | -1.0678 |
| children | 12p11.22      | 27849427 | 27850566 | 387849    | <i>REP15</i>     | 0 | -1.0678 |
| children | 12p11         | 27863705 | 27909237 | 60488     | <i>MRPS35</i>    | 0 | -1.0678 |
| children | 12p11.22      | 27915598 | 27924209 | 100287284 | <i>MANSC4</i>    | 0 | -1.0678 |
| children | 12p13.33      | 2870365  | 2880835  | 283440    | <i>LOC283440</i> | 0 | -1.0998 |
| children | 12p13.33      | 2904107  | 2914587  | 2288      | <i>FKBP4</i>     | 0 | -1.0998 |
| children | 12p13.33      | 2921786  | 2934237  | 55846     | <i>ITFG2</i>     | 0 | -1.0998 |
| children | 12p13.33      | 2934513  | 2944221  | 83714     | <i>NRIP2</i>     | 0 | -1.0998 |
| children | 12p13         | 2966846  | 2986321  | 2305      | <i>FOXMI</i>     | 0 | -1.0998 |

|          |                 |         |         |        |                 |   |         |
|----------|-----------------|---------|---------|--------|-----------------|---|---------|
| children | 12p13.33        | 2986364 | 2998691 | 83695  | <i>RHNO1</i>    | 0 | -1.0998 |
| children | 12p13.3         | 3000032 | 3050306 | 7289   | <i>TULP3</i>    | 0 | -1.0998 |
| children | 12p13.3-p13.2   | 3068477 | 3149842 | 7004   | <i>TEAD4</i>    | 0 | -1.0998 |
| children | 12p13.33-p13.32 | 3186520 | 3395730 | 10867  | <i>TSPAN9</i>   | 0 | -1.114  |
| children | 12p13.3         | 3490514 | 3703138 | 56341  | <i>PRMT8</i>    | 0 | -1.1281 |
| children | 12p13.3         | 3918026 | 3982614 | 57097  | <i>PARP11</i>   | 0 | -1.1281 |
| children | 12p13           | 4382901 | 4414522 | 894    | <i>CCND2</i>    | 0 | -1.3585 |
| children | 12p13.3         | 4430358 | 4469190 | 57103  | <i>C12orf5</i>  | 0 | -1.3585 |
| children | 12p13.3         | 4477392 | 4488894 | 8074   | <i>FGF23</i>    | 0 | -1.3585 |
| children | 12p13           | 4543307 | 4554780 | 2251   | <i>FGF6</i>     | 0 | -1.3585 |
| children | 12p13.3         | 4596895 | 4647674 | 57102  | <i>C12orf4</i>  | 0 | -1.3585 |
| children | 12p13.2-p13.1   | 4647949 | 4669213 | 10635  | <i>RAD51AP1</i> | 0 | -1.3585 |
| children | 12p13.32        | 4699237 | 4723054 | 8798   | <i>DYRK4</i>    | 0 | -1.3585 |
| children | 12p13.3         | 4724673 | 4758213 | 10566  | <i>AKAP3</i>    | 0 | -1.3585 |
| children | 12p13.3         | 4758263 | 4796720 | 4704   | <i>NDUFA9</i>   | 0 | -1.3585 |
| children | 12p13.3         | 4829751 | 4881892 | 26290  | <i>GALNT8</i>   | 0 | -1.3585 |
| children | 12p13           | 4918341 | 4960278 | 3742   | <i>KCNA6</i>    | 0 | -1.3585 |
| children | 12p13.32        | 5019072 | 5027422 | 3736   | <i>KCNA1</i>    | 0 | -1.3585 |
| children | 12p13           | 5153084 | 5155954 | 3741   | <i>KCNA5</i>    | 0 | -1.3585 |
| children | 12p13           | 5541279 | 5604465 | 4908   | <i>NTF3</i>     | 0 | -1.3585 |
| children | 12p13.3         | 6058039 | 6233836 | 7450   | <i>VWF</i>      | 0 | -1.3386 |
| children | 12p13.3         | 6309481 | 6347437 | 928    | <i>CD9</i>      | 0 | -1.3416 |
| children | 12p13.31        | 6419601 | 6437672 | 55200  | <i>PLEKHG6</i>  | 0 | -1.3416 |
| children | 12p13.2         | 6437922 | 6451283 | 7132   | <i>TNFRSF1A</i> | 0 | -1.3416 |
| children | 12p13           | 6456008 | 6484390 | 6337   | <i>SCNN1A</i>   | 0 | -1.3416 |
| children | 12p13           | 6484533 | 6500737 | 4055   | <i>LTBR</i>     | 0 | -1.3416 |
| children | 12p13.31        | 6548166 | 6560683 | 678655 | <i>CD27-AS1</i> | 0 | -1.3416 |
| children | 12p13           | 6554050 | 6560884 | 939    | <i>CD27</i>     | 0 | -1.3416 |
| children | 12p13.31        | 6561176 | 6571488 | 55080  | <i>TAPBPL</i>   | 0 | -1.3416 |
| children | 12p             | 6571403 | 6580065 | 6843   | <i>VAMP1</i>    | 0 | -1.3416 |
| children | 12p13.3-p13.1   | 6601315 | 6602471 | 51258  | <i>MRPL51</i>   | 0 | -1.3416 |
| children | 12p13.3         | 6603297 | 6641132 | 9918   | <i>NCAPD2</i>   | 0 | -1.3416 |
| children | 12p13.31        | 6619387 | 6619717 | 692148 | <i>SCARNA10</i> | 0 | -1.3416 |

|          |          |         |         |        |                 |   |         |
|----------|----------|---------|---------|--------|-----------------|---|---------|
| children | 12p13    | 6643570 | 6647541 | 2597   | <i>GAPDH</i>    | 0 | -1.3416 |
| children | 12p13.3  | 6648693 | 6665249 | 25900  | <i>IFFO1</i>    | 0 | -1.3416 |
| children | 12p13    | 6666035 | 6677498 | 4839   | <i>NOP2</i>     | 0 | -1.3416 |
| children | 12p13    | 6679247 | 6716599 | 1108   | <i>CHD4</i>     | 0 | -1.3416 |
| children | 12p13.31 | 6690638 | 6690775 | 677780 | <i>SCARNA11</i> | 0 | -1.3416 |
| children | 12p13.31 | 6728000 | 6740815 | 57121  | <i>LPAR5</i>    | 0 | -1.3416 |
| children | 12p13.31 | 6747241 | 6756580 | 84519  | <i>ACRBP</i>    | 0 | -1.3416 |
| children | 12p13.31 | 6759703 | 6772308 | 51147  | <i>ING4</i>     | 0 | -1.3416 |
| children | 12p12    | 6775642 | 6798541 | 171017 | <i>ZNF384</i>   | 0 | -1.3416 |
| children | 12p13.31 | 6802956 | 6809596 | 196500 | <i>PIANP</i>    | 0 | -1.3416 |
| children | 12p13.31 | 6833149 | 6841041 | 50813  | <i>COP57A</i>   | 0 | -1.3416 |
| children | 12p13    | 6857157 | 6862082 | 8079   | <i>MLF2</i>     | 0 | -1.3416 |
| children | 12p13    | 6875540 | 6880118 | 5763   | <i>PTMS</i>     | 0 | -1.3416 |
| children | 12p13.32 | 6881669 | 6887621 | 3902   | <i>LAG3</i>     | 0 | -1.3416 |
| children | 12p13.31 | 6898637 | 6929976 | 920    | <i>CD4</i>      | 0 | -1.3416 |
| children | 12p13    | 6930962 | 6936583 | 27239  | <i>GPR162</i>   | 0 | -1.3416 |
| children | 12p13    | 6950017 | 6956559 | 2784   | <i>GNB3</i>     | 0 | -1.3416 |
| children | 12p13    | 6957971 | 6961230 | 83461  | <i>CDC43</i>    | 0 | -1.3416 |
| children | 12p13    | 6961284 | 6975795 | 8078   | <i>USP5</i>     | 0 | -1.3416 |
| children | 12p13    | 6976692 | 6980110 | 7167   | <i>TPI1</i>     | 0 | -1.3416 |
| children | 12p13.31 | 6980099 | 6982449 | 84727  | <i>SPSB2</i>    | 0 | -1.3416 |
| children | 12p13.31 | 6993144 | 6993768 | 283345 | <i>RPL13P5</i>  | 0 | -1.3416 |
| children | 12p13    | 6993845 | 6994950 | 171220 | <i>DSTNP2</i>   | 0 | -1.3416 |
| children | 12p13    | 7013896 | 7023406 | 10233  | <i>LRRC23</i>   | 0 | -1.3416 |
| children | 12p13    | 7023613 | 7032859 | 2026   | <i>ENO2</i>     | 0 | -1.3416 |
| children | 12p13.31 | 7033625 | 7051484 | 1822   | <i>ATN1</i>     | 0 | -1.3416 |
| children | 12p13.31 | 7052979 | 7055166 | 113246 | <i>CI2orf57</i> | 0 | -1.3416 |
| children | 12p13    | 7055739 | 7070479 | 5777   | <i>PTPN6</i>    | 0 | -1.3416 |
| children | 12p13.31 | 7072861 | 7072929 | 406985 | <i>MIR200C</i>  | 0 | -1.3416 |
| children | 12p13.31 | 7073259 | 7073354 | 406933 | <i>MIR141</i>   | 0 | -1.3416 |
| children | 12p13    | 7074514 | 7079916 | 11331  | <i>PHB2</i>     | 0 | -1.3416 |
| children | 12p13.31 | 7076499 | 7076769 | 677777 | <i>SCARNA12</i> | 0 | -1.3416 |
| children | 12p13.3  | 7079943 | 7085165 | 10436  | <i>EMG1</i>     | 0 | -1.3416 |

|          |               |         |         |        |                 |   |         |
|----------|---------------|---------|---------|--------|-----------------|---|---------|
| children | 12p13         | 7085346 | 7125842 | 10162  | <i>LPCAT3</i>   | 0 | -1.3416 |
| children | 12p13         | 7167979 | 7178335 | 716    | <i>CIS</i>      | 0 | -1.3416 |
| children | 12p13         | 7187514 | 7245043 | 715    | <i>CIR</i>      | 0 | -1.3416 |
| children | 12p13.31      | 7247145 | 7261874 | 51279  | <i>CIRL</i>     | 0 | -1.3416 |
| children | 12p13.31      | 7260903 | 7274447 | 283314 | <i>CIRL-ASI</i> | 0 | -1.3416 |
| children | 12p13.31      | 7276279 | 7281466 | 83758  | <i>RBP5</i>     | 0 | -1.3416 |
| children | 12p13.31      | 7282966 | 7311530 | 9746   | <i>CLSTN3</i>   | 0 | -1.3416 |
| children | 12p13.31      | 7341758 | 7371169 | 5830   | <i>PEX5</i>     | 0 | -1.3416 |
| children | 12p13.31      | 7456927 | 7480969 | 341392 | <i>ACSM4</i>    | 0 | -1.6087 |
| children | 12p13.3       | 7507555 | 7596781 | 283316 | <i>CD163LI</i>  | 0 | -1.6087 |
| children | 12p13.3       | 7623411 | 7656414 | 9332   | <i>CD163</i>    | 0 | -1.6087 |
| children | 12p13.1       | 7801995 | 7818499 | 339    | <i>APOBEC1</i>  | 0 | -1.4142 |
| children | 12p13.1       | 7842380 | 7848360 | 9573   | <i>GDF3</i>     | 0 | -1.4142 |
| children | 12p13.31      | 7864049 | 7870152 | 359787 | <i>DPPA3</i>    | 0 | -1.4142 |
| children | 12p13.2-p12.3 | 7882010 | 7902069 | 170482 | <i>CLEC4C</i>   | 0 | -1.4142 |
| children | 12p13.31      | 7917811 | 7926717 | 360030 | <i>NANOGNB</i>  | 0 | -1.4142 |
| children | 12p13.31      | 7941991 | 7948657 | 79923  | <i>NANOG</i>    | 0 | -1.4142 |
| children | 12p13.31      | 7965107 | 8025635 | 144195 | <i>SLC2A14</i>  | 0 | -1.4142 |
| children | 12p13.3       | 8071823 | 8088892 | 6515   | <i>SLC2A3</i>   | 0 | -1.4142 |
| children | 12p13.31      | 8185358 | 8208118 | 55810  | <i>FOXJ2</i>    | 0 | -1.4142 |
| children | 12p13.31      | 8210918 | 8218955 | 719    | <i>C3ARI</i>    | 0 | -1.4142 |
| children | 12p13.31      | 8234806 | 8250373 | 25977  | <i>NECAP1</i>   | 0 | -1.4142 |
| children | 12p13         | 8276227 | 8291203 | 50856  | <i>CLEC4A</i>   | 0 | -1.4142 |
| children | 12p13         | 8608590 | 8630926 | 93978  | <i>CLEC6A</i>   | 0 | -1.2745 |
| children | 12p13.31      | 8666135 | 8674960 | 338339 | <i>CLEC4D</i>   | 0 | -1.2745 |
| children | 12p13.31      | 8685900 | 8693558 | 26253  | <i>CLEC4E</i>   | 0 | -1.2745 |
| children | 12p13         | 8754761 | 8765442 | 57379  | <i>AICDA</i>    | 0 | -1.2745 |
| children | 12p13.1-p12.3 | 8798538 | 8815484 | 8076   | <i>MFAP5</i>    | 0 | -1.2745 |
| children | 12p13.31      | 8852380 | 8929787 | 57494  | <i>RIMKLB</i>   | 0 | -1.5649 |
| children | 12p13.31      | 8975067 | 9029377 | 144568 | <i>A2ML1</i>    | 0 | -1.5649 |
| children | 12p13         | 9067315 | 9094060 | 1911   | <i>PHC1</i>     | 0 | -1.5649 |
| children | 12p13         | 9092956 | 9102357 | 4074   | <i>M6PR</i>     | 0 | -1.5649 |
| children | 12p13.31      | 9142220 | 9163340 | 10219  | <i>KLRG1</i>    | 0 | -1.5649 |

|          |             |          |          |        |                  |   |         |
|----------|-------------|----------|----------|--------|------------------|---|---------|
| children | 12p13.31    | 9208184  | 9217666  | 253128 | <i>LINC00612</i> | 0 | -1.5649 |
| children | 12p13.31    | 9217772  | 9220651  | 144571 | <i>A2M-AS1</i>   | 0 | -1.5649 |
| children | 12p13.31    | 9220303  | 9268558  | 2      | <i>A2M</i>       | 0 | -1.5649 |
| children | 12q22       | 92534053 | 92539673 | 694    | <i>BTG1</i>      | 0 | -1.1201 |
| children | 12p13-p12.2 | 9301435  | 9360966  | 5858   | <i>PZP</i>       | 0 | -1.5649 |
| children | 12p13.31    | 9381128  | 9386803  | 3      | <i>A2MP1</i>     | 0 | -1.5649 |
| children | 12p13.31    | 9436252  | 9466684  | 642846 | <i>LOC642846</i> | 0 | -1.5649 |
| children | 12p13.31    | 9570286  | 9600768  | 440081 | <i>DDX12P</i>    | 0 | -1.088  |
| children | 12p13       | 9747869  | 9760497  | 3820   | <i>KLRB1</i>     | 0 | -2.3863 |
| children | 12p13.31    | 9769879  | 9811010  | 374443 | <i>LOC374443</i> | 0 | -2.3863 |
| children | 12p13       | 9822303  | 9852151  | 29121  | <i>CLEC2D</i>    | 0 | -2.3863 |
| children | 12p13.31    | 9868455  | 9885895  | 160365 | <i>CLECL1</i>    | 0 | -2.3863 |
| children | 12p13       | 9905081  | 9913497  | 969    | <i>CD69</i>      | 0 | -2.3863 |
| children | 12p13.31    | 9980076  | 9997603  | 51348  | <i>KLRF1</i>     | 0 | -2.3863 |
| children | 13q14.2     | 49550047 | 49783915 | 22862  | <i>FNDC3A</i>    | 0 | -1.1587 |
| children | 13q14-q21   | 49794473 | 49796513 | 2862   | <i>MLNR</i>      | 0 | -1.1587 |
| children | 13q14.2     | 49822046 | 49867622 | 81602  | <i>CDADC1</i>    | 0 | -1.1587 |
| children | 13q14.2     | 49882785 | 49975674 | 81617  | <i>CAB39L</i>    | 0 | -1.1587 |
| children | 13q14       | 50018428 | 50069139 | 83852  | <i>SETDB2</i>    | 0 | -1.1587 |
| children | 13q14.2     | 50069800 | 50103117 | 51131  | <i>PHF11</i>     | 0 | -1.1587 |
| children | 13q14       | 50106081 | 50159719 | 55213  | <i>RCBTB1</i>    | 0 | -1.1587 |
| children | 13q14.2     | 50202434 | 50208008 | 115761 | <i>ARL11</i>     | 0 | -1.1587 |
| children | 13q12-q13   | 50234811 | 50265623 | 84650  | <i>EBPL</i>      | 0 | -1.1587 |
| children | 13q14.3     | 50273442 | 50367057 | 3839   | <i>KPNA3</i>     | 0 | -1.1587 |
| children | 13q14.2     | 50464544 | 50467516 | 220429 | <i>CTAGE10P</i>  | 0 | -1.1587 |
| children | 13q14       | 50486837 | 50510637 | 57213  | <i>SPRYD7</i>    | 0 | -1.1587 |
| children | 13q14.3     | 50556687 | 50699677 | 8847   | <i>DLEU2</i>     | 0 | -1.1587 |
| children | 13q14       | 50571142 | 50592603 | 10206  | <i>TRIM13</i>    | 0 | -1.1587 |
| children | 13q14.2     | 50589389 | 50595058 | 283518 | <i>KCNRG</i>     | 0 | -1.1587 |
| children | 13q14.2     | 50623254 | 50623337 | 406950 | <i>MIR16-1</i>   | 0 | -1.1587 |
| children | 13q14.3     | 50656304 | 50681354 | 10301  | <i>DLEU1</i>     | 0 | -1.1587 |
| children | 13q14.3     | 50746153 | 50747751 | 145165 | <i>ST13P4</i>    | 0 | -1.1587 |
| children | 13q14.3     | 51285161 | 51418075 | 220107 | <i>DLEU7</i>     | 0 | -1.1587 |

|          |          |          |          |           |                  |   |         |
|----------|----------|----------|----------|-----------|------------------|---|---------|
| children | 13q14.3  | 51483813 | 51530901 | 79621     | <i>RNASEH2B</i>  | 0 | -1.1587 |
| children | 13q14.3  | 51568646 | 51640293 | 2974      | <i>GUCY1B2</i>   | 0 | -1.1587 |
| children | 13q14.3  | 51656983 | 51746358 | 647166    | <i>LINC00371</i> | 0 | -1.1587 |
| children | 13q14.3  | 51796469 | 51858377 | 220108    | <i>FAM124A</i>   | 0 | -1.1587 |
| children | 13q14.3  | 51915167 | 51936239 | 647174    | <i>SERPINE3</i>  | 0 | -1.1587 |
| children | 13q14.3  | 51935700 | 52027275 | 26512     | <i>INTS6</i>     | 0 | -1.1587 |
| children | 13q14.3  | 52158483 | 52336171 | 115825    | <i>WDFY2</i>     | 0 | -1.1587 |
| children | 13q14.3  | 52342128 | 52378298 | 79758     | <i>DHRS12</i>    | 0 | -1.1587 |
| children | 13q14.3  | 52387482 | 52419286 | 283521    | <i>LINC00282</i> | 0 | -1.1587 |
| children | 13q14.3  | 52436116 | 52440372 | 83446     | <i>CCDC70</i>    | 0 | -1.1587 |
| children | 13q14.3  | 52506805 | 52585630 | 540       | <i>ATP7B</i>     | 0 | -1.1587 |
| children | 13q14.2  | 52586522 | 52603780 | 9724      | <i>UTP14C</i>    | 0 | -1.1587 |
| children | 13q14.3  | 52638899 | 52703228 | 341676    | <i>NEK5</i>      | 0 | -1.1587 |
| children | 13q14.13 | 52706778 | 52733670 | 4752      | <i>NEK3</i>      | 0 | -1.1587 |
| children | 13q      | 52741844 | 52768602 | 100887750 | <i>MRPS31P5</i>  | 0 | -1.1587 |
| children | 13q14.3  | 52951302 | 52980629 | 55901     | <i>THSD1</i>     | 0 | -1.1587 |
| children | 13q14.3  | 52986736 | 53024813 | 51028     | <i>VPS36</i>     | 0 | -1.1587 |
| children | 13q14    | 53029494 | 53050766 | 26586     | <i>CKAP2</i>     | 0 | -1.1587 |
| children | 13q14.3  | 53063127 | 53161225 | 220115    | <i>TPTE2P3</i>   | 0 | -1.1587 |
| children | 13q14.3  | 53191604 | 53217919 | 144983    | <i>HNRNPAIL2</i> | 0 | -1.1587 |
| children | 13q14.3  | 53226830 | 53262433 | 10910     | <i>SUGT1</i>     | 0 | -1.1587 |
| children | 13q14.3  | 53277399 | 53313947 | 11061     | <i>LECT1</i>     | 0 | -1.1587 |
| children | 13q21.1  | 53418108 | 53422775 | 5100      | <i>PCDH8</i>     | 0 | -1.2538 |
| children | 13q14.3  | 53602875 | 53626196 | 10562     | <i>OLFM4</i>     | 0 | -1.6628 |
| children | 13q14.3  | 54389553 | 54450254 | 100861552 | <i>LINC00558</i> | 0 | -1.6628 |
| children | 13q21.1  | 58205788 | 58303065 | 27253     | <i>PCDH17</i>    | 0 | -1.5837 |
| children | 13q21.2  | 60239720 | 60738119 | 81624     | <i>DIAPH3</i>    | 0 | -1.6522 |
| children | 13q21.2  | 60970590 | 61148013 | 81550     | <i>TDRD3</i>     | 0 | -1.6522 |
| children | 13q21    | 61983818 | 61989655 | 64881     | <i>PCDH20</i>    | 0 | -1.6721 |
| children | 13q21.31 | 64311567 | 64316701 | 283491    | <i>OR7E156P</i>  | 0 | -2.3171 |
| children | 13q21.32 | 66876965 | 67804468 | 5101      | <i>PCDH9</i>     | 0 | -2.3068 |
| children | 13q21.33 | 69435416 | 69459457 | 338862    | <i>LINC00550</i> | 0 | -2.3068 |
| children | 13q21    | 70274724 | 70682625 | 57626     | <i>KLHL1</i>     | 0 | -2.3068 |

|          |             |          |          |           |                  |   |         |
|----------|-------------|----------|----------|-----------|------------------|---|---------|
| children | 13q21       | 70681344 | 70713885 | 6315      | <i>ATXN8OS</i>   | 0 | -2.3068 |
| children | 13q21.33    | 71589272 | 71742549 | 100885781 | <i>LINC00348</i> | 0 | -2.3068 |
| children | 13q22       | 72012097 | 72441330 | 1602      | <i>DACH1</i>     | 0 | -2.2774 |
| children | 13q22.1     | 73282494 | 73301938 | 440145    | <i>MZT1</i>      | 0 | -2.0778 |
| children | 13q22.1     | 73301886 | 73330336 | 79866     | <i>BORA</i>      | 0 | -1.6067 |
| children | 13q22.1     | 73329539 | 73356266 | 22894     | <i>DIS3</i>      | 0 | -1.6067 |
| children | 13q22.1     | 73356229 | 73590591 | 10464     | <i>PIBF1</i>     | 0 | -1.6067 |
| children | 13q22.1     | 73632929 | 73651680 | 688       | <i>KLF5</i>      | 0 | -1.6067 |
| children | 13q22       | 74260148 | 74708066 | 11278     | <i>KLF12</i>     | 0 | -1.6067 |
| children | 13q22.1     | 74993309 | 75009296 | 100874151 | <i>LINC00381</i> | 0 | -1.6067 |
| children | 13q21.33    | 75126979 | 75131257 | 338864    | <i>LINC00347</i> | 0 | -1.6067 |
| children | 13q22.2     | 75811888 | 75814517 | 647288    | <i>CTAGE11P</i>  | 0 | -1.6067 |
| children | 13q22.2     | 75858799 | 76056304 | 9882      | <i>TBC1D4</i>    | 0 | -1.6067 |
| children | 13q22       | 76099349 | 76112008 | 170622    | <i>COMMD6</i>    | 0 | -1.6067 |
| children | 13q22.2     | 76123615 | 76180156 | 7347      | <i>UCHL3</i>     | 0 | -1.6067 |
| children | 13q22.2     | 76194569 | 76434006 | 4008      | <i>LMO7</i>      | 0 | -1.3215 |
| children | 13q22.3     | 77454303 | 77460540 | 115207    | <i>KCTD12</i>    | 0 | -1.3215 |
| children | 13q22       | 77502584 | 77503224 | 690       | <i>BTF3P11</i>   | 0 | -1.3268 |
| children | 13q22.3     | 77526623 | 77532776 | 730249    | <i>IRG1</i>      | 0 | -1.3268 |
| children | 13q21.1-q32 | 77566058 | 77576652 | 1203      | <i>CLN5</i>      | 0 | -1.3268 |
| children | 13q22       | 77579388 | 77601331 | 26224     | <i>FBXL3</i>     | 0 | -1.3268 |
| children | 13q22       | 77618791 | 77901177 | 23077     | <i>MYCBP2</i>    | 0 | -1.3268 |
| children | 13q22       | 78109808 | 78219398 | 8796      | <i>SCEL</i>      | 0 | -1.3268 |
| children | 13q22.3     | 78271988 | 78338377 | 122060    | <i>SLAIN1</i>    | 0 | -1.3268 |
| children | 13q22       | 78469615 | 78492966 | 1910      | <i>EDNRB</i>     | 0 | -1.3268 |
| children | 13q31.1     | 79173229 | 79177695 | 5457      | <i>POU4F1</i>    | 0 | -1.3268 |
| children | 13q31.1     | 79188420 | 79233314 | 79596     | <i>RNF219</i>    | 0 | -1.3268 |
| children | 13q31.1     | 79893002 | 79980356 | 64062     | <i>RBM26</i>     | 0 | -1.3268 |
| children | 13q31.1     | 80055258 | 80130212 | 54602     | <i>NDFIP2</i>    | 0 | -1.3268 |
| children | 13q31.1     | 80910111 | 80915086 | 10253     | <i>SPRY2</i>     | 0 | -1.3268 |
| children | 13q31.1     | 84451339 | 84456528 | 114798    | <i>SLITRK1</i>   | 0 | -1.4446 |
| children | 13q31.1     | 86366921 | 86373483 | 84189     | <i>SLITRK6</i>   | 0 | -1.4446 |
| children | 13q31.2     | 88096241 | 88323218 | 642345    | <i>MIR4500HG</i> | 0 | -1.4446 |



|          |               |          |          |           |                      |        |         |
|----------|---------------|----------|----------|-----------|----------------------|--------|---------|
| children | 13q31.2       | 88270919 | 88270995 | 100616182 | <i>MIR4500</i>       | 0      | -1.4446 |
| children | 13q31.2       | 88324869 | 88331870 | 26050     | <i>SLITRK5</i>       | 0      | -1.4446 |
| children | 13q31.3       | 90883435 | 90883531 | 693207    | <i>MIR622</i>        | 0      | -1.4533 |
| children | 13q31.3       | 91543207 | 91578851 | 144776    | <i>LINC00410</i>     | 0      | -1.4533 |
| children | 15q14         | 41952609 | 42062141 | 23269     | <i>MGA</i>           | 0      | -1.204  |
| children | 15q15.1       | 41983782 | 41983876 | 693211    | <i>MIR626</i>        | 0      | -1.4471 |
| children | 15q15.1       | 42066631 | 42120053 | 23005     | <i>MAPKBP1</i>       | 0      | -1.4471 |
| children | 15q15.1       | 42120282 | 42129785 | 100137047 | <i>JMJD7</i>         | 0      | -1.4471 |
| children | 15q11.2-q21.3 | 42120282 | 42140346 | 8681      | <i>JMJD7-PLA2G4B</i> | 0      | -1.4471 |
| children | 15q11.2-q21.3 | 42131010 | 42140346 | 100137049 | <i>PLA2G4B</i>       | 0      | -1.4471 |
| children | 15q21         | 42140343 | 42186275 | 51332     | <i>SPTBN5</i>        | 0      | -1.4471 |
| children | 15q11.1       | 42191638 | 42264755 | 30844     | <i>EHD4</i>          | 0      | -1.4471 |
| children | 15q15.1       | 42273779 | 42342901 | 123745    | <i>PLA2G4E</i>       | 0      | -1.2132 |
| children | 15q15.1       | 42359880 | 42386752 | 283748    | <i>PLA2G4D</i>       | 0      | -1.2132 |
| children | 15q15.1       | 42433331 | 42448839 | 255189    | <i>PLA2G4F</i>       | 0      | -1.2132 |
| children | 15q15.1       | 42450898 | 42500524 | 23339     | <i>VPS39</i>         | 0      | -1.2132 |
| children | 15q15.1       | 42491767 | 42491864 | 693212    | <i>MIR627</i>        | 0      | -1.2132 |
| children | 15q15.1       | 42502649 | 42565782 | 25963     | <i>TMEM87A</i>       | 0      | -1.2132 |
| children | 15q15.2       | 42566365 | 42645864 | 2595      | <i>GANC</i>          | 0      | -1.2132 |
| children | 15q15.1       | 42651697 | 42704515 | 825       | <i>CAPN3</i>         | 0      | -1.2132 |
| children | 15q15.1       | 42704634 | 42749765 | 64397     | <i>ZNF106</i>        | 0      | -1.2132 |
| children | 15q14         | 42787503 | 42825259 | 8773      | <i>SNAP23</i>        | 0      | -1.2132 |
| children | 15q15.2       | 42834719 | 42841002 | 255252    | <i>LRRC57</i>        | 0      | -1.2132 |
| children | 15q15.2       | 42841010 | 42862190 | 55142     | <i>HAUS2</i>         | 0      | -1.2132 |
| children | 18q22.1       | 65173818 | 65183967 | 92126     | <i>DSEL</i>          | 1.2279 | -1.1123 |
| children | 18q22.1       | 65183782 | 65566856 | 643542    | <i>LOC643542</i>     | 1.2279 | -1.0627 |
| children | 19p13.3       | 1040101  | 1065570  | 10347     | <i>ABCA7</i>         | 0.7347 | -1.6301 |
| children | 19p13.3       | 1065921  | 1087830  | 23526     | <i>HMHA1</i>         | 0.7347 | -1.8712 |
| children | 19p13.3       | 1086577  | 1095391  | 5434      | <i>POLR2E</i>        | 0.7347 | -1.8712 |
| children | 19p13.3       | 1103924  | 1106788  | 2879      | <i>GPX4</i>          | 0.7347 | -1.8712 |
| children | 19p13.3       | 1107632  | 1132273  | 22904     | <i>SBNO2</i>         | 0.7347 | -1.8712 |
| children | 19p13.3       | 1205797  | 1228434  | 6794      | <i>STK11</i>         | 0.7347 | -1.8712 |
| children | 19p13.3       | 1229946  | 1237990  | 255057    | <i>C19orf26</i>      | 0.7347 | -1.8712 |

|          |         |         |         |        |                  |        |         |
|----------|---------|---------|---------|--------|------------------|--------|---------|
| children | 19p13.3 | 1241748 | 1244824 | 513    | <i>ATP5D</i>     | 0.7347 | -1.8712 |
| children | 19p13.3 | 1248551 | 1259142 | 90007  | <i>MIDN</i>      | 0.4264 | -1.8712 |
| children | 19p13.3 | 1267469 | 1270259 | 148046 | <i>CIRBP-AS1</i> | 0.4264 | -1.8712 |
| children | 19p13.3 | 1269266 | 1273171 | 1153   | <i>CIRBP</i>     | 0.4264 | -1.8712 |
| children | 19p13.3 | 1275519 | 1279243 | 55009  | <i>C19orf24</i>  | 0.4264 | -1.8712 |
| children | 19p13.3 | 1286152 | 1301429 | 1943   | <i>EFNA2</i>     | 0.4264 | -1.8712 |
| children | 19p13.3 | 1354975 | 1378430 | 84939  | <i>MUM1</i>      | 0.4264 | -1.8712 |
| children | 19p13.3 | 1383882 | 1395588 | 374291 | <i>NDUFS7</i>    | 0.4264 | -1.8712 |
| children | 19p13.3 | 1397024 | 1401569 | 2593   | <i>GAMT</i>      | 0.4264 | -1.8712 |
| children | 19p13.3 | 1407567 | 1435686 | 26528  | <i>DAZAP1</i>    | 0.4264 | -1.8712 |
| children | 19p13.3 | 1438362 | 1440496 | 6209   | <i>RPS15</i>     | 0.4264 | -1.8712 |
| children | 19p13.3 | 1450147 | 1473243 | 10297  | <i>APC2</i>      | 0.4264 | -1.8712 |
| children | 19p13.3 | 1473199 | 1479228 | 148223 | <i>C19orf25</i>  | 0.7997 | -2.2014 |
| children | 19p13.3 | 1481426 | 1490449 | 54760  | <i>PCSK4</i>     | 0.7997 | -2.2014 |
| children | 19p13.3 | 1491164 | 1497924 | 92840  | <i>REEP6</i>     | 0.7997 | -2.2014 |
| children | 19p13.3 | 1505016 | 1513188 | 339366 | <i>ADAMTSL5</i>  | 0.7997 | -2.2014 |
| children | 19p13.3 | 1524072 | 1535455 | 126520 | <i>PLK5</i>      | 0.7997 | -2.2014 |
| children | 19p13.3 | 1554667 | 1568057 | 399664 | <i>MEX3D</i>     | 0.7997 | -1.9685 |
| children | 19p13.3 | 416582  | 460996  | 25759  | <i>SHC2</i>      | 0.9926 | -1.3618 |
| children | 19p13.3 | 463345  | 474983  | 284451 | <i>ODF3L2</i>    | 0.9926 | -1.3618 |
| children | 19p13.3 | 496489  | 505343  | 8174   | <i>MADCAM1</i>   | 0.9926 | -1.3618 |
| children | 19p13.3 | 507496  | 519654  | 91978  | <i>TPGS1</i>     | 0.9926 | -1.3618 |
| children | 19p13.3 | 531732  | 542087  | 997    | <i>CDC34</i>     | 1.0596 | -1.3618 |
| children | 19p13.3 | 544033  | 549920  | 3004   | <i>GZMM</i>      | 1.0596 | -1.3618 |
| children | 19p13.3 | 589892  | 617159  | 610    | <i>HCN2</i>      | 1.0596 | -1.3926 |
| children | 19p13.3 | 617222  | 633568  | 5442   | <i>POLRMT</i>    | 1.0596 | -1.3926 |
| children | 19p13.3 | 639925  | 643604  | 27006  | <i>FGF22</i>     | 1.0596 | -1.3926 |
| children | 19p13.3 | 647525  | 663233  | 55658  | <i>RNF126</i>    | 1.0596 | -1.3926 |
| children | 19p13   | 676388  | 683392  | 10272  | <i>FSTL3</i>     | 1.0596 | -1.3926 |
| children | 19p13.3 | 685520  | 695461  | 400668 | <i>PRSS57</i>    | 1.0596 | -1.3926 |
| children | 19p13.3 | 708952  | 748330  | 5064   | <i>PALM</i>      | 1.0596 | -1.3926 |
| children | 19p13.3 | 751145  | 764318  | 126353 | <i>MISP</i>      | 1.0596 | -1.3926 |
| children | 19p13.3 | 797391  | 812327  | 5725   | <i>PTBP1</i>     | 1.0596 | -1.3926 |

|          |                 |          |          |           |                       |        |         |
|----------|-----------------|----------|----------|-----------|-----------------------|--------|---------|
| children | 19p13.3         | 812487   | 821952   | 79948     | <i>LPPR3</i>          | 1.0596 | -1.3926 |
| children | 19p13.3         | 827825   | 832018   | 566       | <i>AZU1</i>           | 1.0596 | -1.3926 |
| children | 19p13.3         | 840984   | 848175   | 5657      | <i>PRTN3</i>          | 1.0596 | -1.3926 |
| children | 19p13.3         | 852290   | 856246   | 1991      | <i>ELANE</i>          | 1.0596 | -1.3926 |
| children | 19p13.3         | 859658   | 863569   | 1675      | <i>CFD</i>            | 1.0596 | -1.3926 |
| children | 19p13.3         | 867961   | 893218   | 10025     | <i>MED16</i>          | 1.0596 | -1.3926 |
| children | 20q11.22        | 33703159 | 33735161 | 55741     | <i>EDEM2</i>          | 0      | -1.1439 |
| children | 20q11.2         | 33759739 | 33765165 | 10544     | <i>PROCR</i>          | 0      | -1.1439 |
| children | 20q11.2         | 33814538 | 33864804 | 10893     | <i>MMP24</i>          | 0      | -1.1439 |
| children | 20q11.22        | 33864135 | 33865960 | 101410538 | <i>MMP24-ASI</i>      | 0      | -1.1439 |
| children | 20q12           | 33866708 | 33872520 | 3692      | <i>EIF6</i>           | 0      | -1.1439 |
| children | 20q11.22        | 33873533 | 33880225 | 128876    | <i>FAM83C</i>         | 0      | -1.1439 |
| children | 20q11.2         | 34021144 | 34025970 | 8200      | <i>GDF5</i>           | 0      | -1.1439 |
| children | 20q11.22        | 34043222 | 34099803 | 11190     | <i>CEP250</i>         | 0      | -1.1439 |
| children | 20q11.22        | 34114798 | 34117481 | 140873    | <i>C20orf173</i>      | 0      | -1.1439 |
| children | 20pter-q12      | 34129777 | 34145405 | 51614     | <i>ERGIC3</i>         | 0      | -1.1439 |
| children | 20q11.21        | 34203805 | 34208971 | 6676      | <i>SPAG4</i>          | 0      | -1.1439 |
| children | 20q11.22        | 34213952 | 34241831 | 8904      | <i>CPNE1</i>          | 0      | -1.1439 |
| children | 20q11.21        | 34236846 | 34252878 | 10137     | <i>RBM12</i>          | 0      | -1.1439 |
| children | 20q11.22        | 34256609 | 34287287 | 9054      | <i>NFS1</i>           | 0      | -1.1439 |
| children | 20q11.22        | 34287231 | 34288902 | 140823    | <i>ROMO1</i>          | 0      | -1.1439 |
| children | 20q11.22        | 34291530 | 34330258 | 9584      | <i>RBM39</i>          | 0      | -1.1439 |
| children | 20q11.22-q11.23 | 34359922 | 34538288 | 51230     | <i>PHF20</i>          | 0      | -1.1439 |
| children | 20q11.1-q11.23  | 34541538 | 34542548 | 51282     | <i>SCAND1</i>         | 0      | -1.1439 |
| children | 20q11.23        | 34556502 | 34618622 | 140894    | <i>CNBD2</i>          | 0      | -1.1439 |
| children | 20q11.23        | 34633539 | 34638882 | 647979    | <i>LINC00657</i>      | 0      | -1.1439 |
| children | 20q11.2-q12     | 34679425 | 34820721 | 2036      | <i>EPB41L1</i>        | 0      | -1.1439 |
| children | 20pter-q12      | 34824338 | 34844863 | 25980     | <i>AAR2</i>           | 0      | -1.1439 |
| children | 20q11.23        | 34894244 | 35157040 | 22839     | <i>DLGAP4</i>         | 0      | -1.1439 |
| children | 20q11.23        | 35169886 | 35178226 | 10398     | <i>MYL9</i>           | 0      | -1.1439 |
| children | 20q11.23        | 35201875 | 35222355 | 60436     | <i>TGIF2</i>          | 0      | -1.1439 |
| children | 20q             | 35202956 | 35240960 | 100527943 | <i>TGIF2-C20orf24</i> | 0      | -1.1439 |
| children | 20q11.23        | 35234136 | 35240960 | 55969     | <i>C20orf24</i>       | 0      | -1.1439 |

|          |                 |          |          |           |                     |   |         |
|----------|-----------------|----------|----------|-----------|---------------------|---|---------|
| children | 20q11.23        | 35240923 | 35274619 | 84174     | <i>SLA2</i>         | 0 | -1.1439 |
| children | 20q11.21-q11.23 | 35280168 | 35374541 | 57446     | <i>NDRG3</i>        | 0 | -1.1439 |
| children | 20q11.23        | 35380193 | 35402154 | 79980     | <i>DSN1</i>         | 0 | -1.1439 |
| children | 20q11.23        | 35405844 | 35488276 | 140710    | <i>SOGAI</i>        | 0 | -1.1439 |
| children | 20q11.23        | 35504523 | 35522634 | 140711    | <i>TLDC2</i>        | 0 | -1.1439 |
| children | 20pter-q12      | 35520226 | 35580246 | 25939     | <i>SAMHD1</i>       | 0 | -1.1439 |
| children | 20q11.2         | 35624754 | 35724403 | 5933      | <i>RBL1</i>         | 0 | -1.1439 |
| children | 20q11.22        | 35729628 | 35807991 | 140699    | <i>MROH8</i>        | 0 | -1.1439 |
| children | 20q12-q13.1     | 35807455 | 35870025 | 6185      | <i>RPN2</i>         | 0 | -1.1439 |
| children | 20q11.2         | 35879489 | 35885299 | 2691      | <i>GHRH</i>         | 0 | -1.1439 |
| children | 20q11.23        | 35918050 | 35945663 | 63905     | <i>MANBAL</i>       | 0 | -1.1439 |
| children | 20q12-q13       | 35973087 | 36033835 | 6714      | <i>SRC</i>          | 0 | -1.1439 |
| children | 20q11.23        | 36145818 | 36152953 | 10904     | <i>BLCAP</i>        | 0 | -1.1439 |
| children | 20q11.2-q12     | 36149606 | 36152090 | 4826      | <i>NNAT</i>         | 0 | -1.1439 |
| children | 20q11.23        | 36247699 | 36251521 | 100861522 | <i>LINC00489</i>    | 0 | -1.1439 |
| children | 20q11.23        | 36305311 | 36311636 | 100287792 | <i>LOC100287792</i> | 0 | -1.1439 |
| children | 20q11.23-q12    | 36322356 | 36500531 | 56259     | <i>CTNBL1</i>       | 0 | -1.1439 |
| children | 20q11.23        | 36531498 | 36573747 | 128434    | <i>VSTM2L</i>       | 0 | -1.1439 |
| children | 20q11.23        | 36611408 | 36661870 | 9675      | <i>TTI1</i>         | 0 | -1.1439 |
| children | 20q11.23        | 36661947 | 36720766 | 58490     | <i>RPRD1B</i>       | 0 | -1.1439 |
| children | 20q12           | 36756863 | 36793700 | 7052      | <i>TGM2</i>         | 0 | -1.1439 |
| children | 20q11.23        | 36838906 | 36889174 | 85449     | <i>KIAA1755</i>     | 0 | -1.1439 |
| children | 20q11.23        | 36932551 | 36965905 | 671       | <i>BPI</i>          | 0 | -1.1439 |
| children | 20q11.23        | 36974813 | 37005653 | 3929      | <i>LBP</i>          | 0 | -1.1439 |
| children | 20q11.23        | 37049238 | 37064018 | 388796    | <i>SNHG17</i>       | 0 | -1.1818 |
| children | 20q11.23        | 37053842 | 37053978 | 26776     | <i>SNORA71B</i>     | 0 | -1.1818 |
| children | 20q11.23        | 37055948 | 37056086 | 26777     | <i>SNORA71A</i>     | 0 | -1.1818 |
| children | 20q11.23        | 37058309 | 37058447 | 677839    | <i>SNORA71C</i>     | 0 | -1.1818 |
| children | 20q11.23        | 37062504 | 37062642 | 677840    | <i>SNORA71D</i>     | 0 | -1.1818 |
| children | 20q11.23        | 37075296 | 37079564 | 128439    | <i>SNHG11</i>       | 0 | -1.1818 |
| children | 20q11.23        | 37101448 | 37207504 | 57148     | <i>RALGAPB</i>      | 0 | -1.1818 |
| children | 20q11.23        | 37209837 | 37217106 | 149685    | <i>ADIG</i>         | 0 | -1.1818 |
| children | 20q11.23        | 37230576 | 37279295 | 343578    | <i>ARHGAP40</i>     | 0 | -1.1818 |

|          |               |          |          |        |                  |   |         |
|----------|---------------|----------|----------|--------|------------------|---|---------|
| children | 20q11.23      | 37353104 | 37358015 | 140679 | <i>SLC32A1</i>   | 0 | -1.1818 |
| children | 20q11.23      | 37377096 | 37401089 | 79913  | <i>ACTR5</i>     | 0 | -1.1818 |
| children | 20q11.23      | 37434335 | 37551667 | 26051  | <i>PPP1R16B</i>  | 0 | -1.1818 |
| children | 20q11.23      | 37554954 | 37581703 | 81610  | <i>FAM83D</i>    | 0 | -1.1818 |
| children | 20q11.22-q12  | 37590980 | 37668366 | 60625  | <i>DHX35</i>     | 0 | -1.1818 |
| children | 20q12         | 37842423 | 37853391 | 339568 | <i>LOC339568</i> | 0 | -1.1818 |
| children | 20q12         | 39314487 | 39317880 | 9935   | <i>MAFB</i>      | 0 | -1.1818 |
| children | 20q12-q13.1   | 39657461 | 39753126 | 7150   | <i>TOP1</i>      | 0 | -1.1818 |
| children | 20q12-q13.1   | 39766160 | 39804357 | 5335   | <i>PLCG1</i>     | 0 | -1.1818 |
| children | 20q12         | 39807088 | 39928739 | 23051  | <i>ZHX3</i>      | 0 | -1.2202 |
| children | 20q12         | 39988605 | 39995498 | 90187  | <i>EMILIN3</i>   | 0 | -1.2586 |
| children | 20q12         | 40030742 | 40247133 | 84181  | <i>CHD6</i>      | 0 | -1.2586 |
| children | 20q12-q13     | 40701391 | 41818557 | 11122  | <i>PTPRT</i>     | 0 | -1.2487 |
| children | 20q12-q13.1   | 42086503 | 42092244 | 6431   | <i>SRSF6</i>     | 0 | -1.2387 |
| children | 20q13.12      | 42136319 | 42170535 | 26013  | <i>L3MBTL1</i>   | 0 | -1.2387 |
| children | 20q13.2       | 42187634 | 42214273 | 10110  | <i>SGK2</i>      | 0 | -1.2387 |
| children | 20q13.12      | 42543491 | 42698254 | 84969  | <i>TOX2</i>      | 0 | -1.0972 |
| children | 20q13.12      | 42740336 | 42816218 | 57158  | <i>JPH2</i>      | 0 | -1.0972 |
| children | 20q13.11      | 42824580 | 42839546 | 51526  | <i>OSER1</i>     | 0 | -1.0972 |
| children | 20q12         | 42875738 | 42909557 | 78997  | <i>GDAP1L1</i>   | 0 | -1.0972 |
| children | 20q13.12      | 42935196 | 42939889 | 128486 | <i>FITM2</i>     | 0 | -1.0972 |
| children | 20q13.12      | 42965797 | 42979432 | 140902 | <i>R3HDML</i>    | 0 | -1.0972 |
| children | 20q13.12      | 42984440 | 43053276 | 3172   | <i>HNF4A</i>     | 0 | -1.0972 |
| children | 20q13.12      | 43104525 | 43123244 | 79183  | <i>TTPAL</i>     | 0 | -1.0972 |
| children | 20q13.12      | 43124863 | 43150726 | 10955  | <i>SERINC3</i>   | 0 | -1.0972 |
| children | 20q12-q13.1   | 43160421 | 43247678 | 11142  | <i>PKIG</i>      | 0 | -1.0972 |
| children | 20q13.12      | 43248162 | 43280376 | 100    | <i>ADA</i>       | 0 | -1.0972 |
| children | 20q13.12      | 43343884 | 43356452 | 8839   | <i>WISP2</i>     | 0 | -1.0953 |
| children | 20q13.12      | 43374487 | 43380954 | 60598  | <i>KCNK15</i>    | 0 | -1.0953 |
| children | 20q13.12      | 43380444 | 43438979 | 140730 | <i>RIMS4</i>     | 0 | -1.0953 |
| children | 20q13.1       | 43514239 | 43537175 | 7529   | <i>YWHAB</i>     | 0 | -1.0953 |
| children | 20q11.2-q13.2 | 43595119 | 43708593 | 6789   | <i>STK4</i>      | 0 | -1.0953 |
| children | 20q12         | 43720949 | 43729753 | 3787   | <i>KCNS1</i>     | 0 | -1.0953 |

|          |              |          |          |           |                    |   |         |
|----------|--------------|----------|----------|-----------|--------------------|---|---------|
| children | 20q13.12     | 43738092 | 43743813 | 149708    | <i>WFDC5</i>       | 0 | -1.0953 |
| children | 20q13.12     | 43752066 | 43753106 | 128488    | <i>WFDC12</i>      | 0 | -1.0953 |
| children | 20q13.12     | 43803539 | 43805185 | 5266      | <i>PI3</i>         | 0 | -1.0953 |
| children | 20q12-q13.2  | 43835637 | 43838414 | 6406      | <i>SEMG1</i>       | 0 | -1.0953 |
| children | 20q12-q13.1  | 43850009 | 43853099 | 6407      | <i>SEMG2</i>       | 0 | -1.0953 |
| children | 20q12        | 43880879 | 43883205 | 6590      | <i>SLPI</i>        | 0 | -1.0953 |
| children | 20q13.12     | 43922085 | 43936937 | 8785      | <i>MATN4</i>       | 0 | -1.0953 |
| children | 20q13.12     | 43935482 | 43946464 | 11317     | <i>RBPJL</i>       | 0 | -1.0953 |
| children | 20q12        | 43953928 | 43977064 | 6385      | <i>SDC4</i>        | 0 | -1.0953 |
| children | 20q13.12     | 43990576 | 43997862 | 90196     | <i>SYS1</i>        | 0 | -1.0953 |
| children | 20q13.12     | 44002519 | 44006957 | 27296     | <i>TP53TG5</i>     | 0 | -1.0953 |
| children | 20q13.12     | 44034632 | 44039250 | 55861     | <i>DBNDD2</i>      | 0 | -1.0953 |
| children | 20q13.12     | 44044706 | 44054885 | 51604     | <i>PIGT</i>        | 0 | -1.0953 |
| children | 20q13.12     | 44098393 | 44110172 | 10406     | <i>WFDC2</i>       | 0 | -1.0953 |
| children | 20q13.12     | 44141100 | 44144264 | 10816     | <i>SPINT3</i>      | 0 | -1.0953 |
| children | 20q13.12     | 44162835 | 44168134 | 140870    | <i>WFDC6</i>       | 0 | -1.0953 |
| children | 20q          | 44164918 | 44176065 | 100526773 | <i>EPPIN-WFDC6</i> | 0 | -1.0953 |
| children | 20q13.12     | 44169264 | 44176065 | 57119     | <i>EPPIN</i>       | 0 | -1.0953 |
| children | 20q13.12     | 44179790 | 44207965 | 90199     | <i>WFDC8</i>       | 0 | -1.0695 |
| children | 20q13.12     | 44236577 | 44259907 | 259240    | <i>WFDC9</i>       | 0 | -1.0695 |
| children | 20q13.12     | 44258384 | 44259831 | 140832    | <i>WFDC10A</i>     | 0 | -1.0695 |
| children | 20q13.12     | 44277201 | 44298878 | 259239    | <i>WFDC11</i>      | 0 | -1.0695 |
| children | 20q13.12     | 44313289 | 44333658 | 280664    | <i>WFDC10B</i>     | 0 | -1.0695 |
| children | 20q13.12     | 44330654 | 44337456 | 164237    | <i>WFDC13</i>      | 0 | -1.0695 |
| children | 20q13.12     | 44350987 | 44354335 | 391253    | <i>SPINT4</i>      | 0 | -1.0695 |
| children | 20q13.12     | 44402846 | 44420547 | 140686    | <i>WFDC3</i>       | 0 | -1.0695 |
| children | 20q13.12     | 44420575 | 44440066 | 116092    | <i>DNTTIP1</i>     | 0 | -1.0695 |
| children | 20q13.12     | 44441214 | 44445596 | 11065     | <i>UBE2C</i>       | 0 | -1.0695 |
| children | 20q12-q13.11 | 44451854 | 44455953 | 7125      | <i>TNNC2</i>       | 0 | -1.0695 |
| children | 20q13.12     | 44462469 | 44471914 | 90203     | <i>SNX21</i>       | 0 | -1.0695 |
| children | 20q13.12     | 44470359 | 44486048 | 10005     | <i>ACOT8</i>       | 0 | -1.0695 |
| children | 20q13.12     | 44486219 | 44507769 | 140831    | <i>ZSWIM3</i>      | 0 | -1.0695 |
| children | 20q13.12     | 44509847 | 44513905 | 90204     | <i>ZSWIM1</i>      | 0 | -1.0695 |

|          |             |          |          |           |                     |   |         |
|----------|-------------|----------|----------|-----------|---------------------|---|---------|
| children | 20q13.12    | 44515129 | 44516238 | 128497    | <i>SPATA25</i>      | 0 | -1.0695 |
| children | 20q13.1     | 44518782 | 44527458 | 5476      | <i>CTSA</i>         | 0 | -1.0695 |
| children | 20q13.12    | 44527258 | 44539633 | 5360      | <i>PLTP</i>         | 0 | -1.0695 |
| children | 20q13.12    | 44563316 | 44576662 | 63935     | <i>PCIF1</i>        | 0 | -1.0695 |
| children | 20q13.12    | 44577291 | 44600833 | 63925     | <i>ZNF335</i>       | 0 | -1.0695 |
| children | 20q13.12    | 44637546 | 44645200 | 4318      | <i>MMP9</i>         | 0 | -1.3158 |
| children | 20q13.12    | 44650328 | 44688789 | 57468     | <i>SLC12A5</i>      | 0 | -1.3158 |
| children | 20q13.12    | 44689625 | 44718580 | 57727     | <i>NCOA5</i>        | 0 | -1.3158 |
| children | 20q12-q13.2 | 44746892 | 44758384 | 958       | <i>CD40</i>         | 0 | -1.3158 |
| children | 20q13.1     | 44802371 | 44937137 | 64405     | <i>CDH22</i>        | 0 | -1.3158 |
| children | 20q13.12    | 44978166 | 44993097 | 51006     | <i>SLC35C2</i>      | 0 | -1.3158 |
| children | 20q13       | 44994689 | 45035271 | 63916     | <i>ELMO2</i>        | 0 | -1.3158 |
| children | 20q13.12    | 45092298 | 45093931 | 7686      | <i>MKRN7P</i>       | 0 | -1.3158 |
| children | 20q13.12    | 45128268 | 45142198 | 55713     | <i>ZNF334</i>       | 0 | -1.3158 |
| children | 20q13.12    | 45169669 | 45179213 | 128506    | <i>OCSTAMP</i>      | 0 | -1.3158 |
| children | 20q13.12    | 45186461 | 45280100 | 64849     | <i>SLC13A3</i>      | 0 | -1.3158 |
| children | 20q13.2     | 45313003 | 45318276 | 112858    | <i>TP53RK</i>       | 0 | -1.3158 |
| children | 20q13.1     | 45338278 | 45364985 | 81031     | <i>SLC2A10</i>      | 0 | -1.3158 |
| children | 20q13.1     | 45523262 | 45817492 | 2139      | <i>EYA2</i>         | 0 | -1.3158 |
| children | 20q13.12    | 45837858 | 45985633 | 23613     | <i>ZMYND8</i>       | 0 | -1.3158 |
| children | 20q13.12    | 45947245 | 45949498 | 100131496 | <i>LOC100131496</i> | 0 | -1.3158 |
| children | 20q12       | 46130600 | 46285621 | 8202      | <i>NCOA3</i>        | 0 | -1.3158 |
| children | 20q13.12    | 46286149 | 46414808 | 55959     | <i>SULF2</i>        | 0 | -1.3158 |
| children | 20q13.13    | 46988653 | 46999381 | 284749    | <i>LINC00494</i>    | 0 | -1.3023 |
| children | 20q13.13    | 47240792 | 47444420 | 57580     | <i>PREX1</i>        | 0 | -1.2755 |
| children | 20q13       | 47662782 | 47713497 | 1434      | <i>CSE1L</i>        | 0 | -1.0695 |
| children | 20q13.1     | 47729875 | 47804904 | 6780      | <i>STAU1</i>        | 0 | -1.314  |
| children | 20q13.13    | 47835831 | 47860614 | 55661     | <i>DDX27</i>        | 0 | -1.314  |
| children | 20q13.13    | 47862438 | 47894756 | 57169     | <i>ZNFXI</i>        | 0 | -1.314  |
| children | 20q13.13    | 47894714 | 47905795 | 441951    | <i>ZFAS1</i>        | 0 | -1.314  |
| children | 20q13.13    | 47895481 | 47895560 | 26765     | <i>SNORD12C</i>     | 0 | -1.314  |
| children | 20q13.13    | 47896849 | 47896952 | 100113393 | <i>SNORD12B</i>     | 0 | -1.314  |
| children | 20q13.13    | 47897219 | 47897309 | 692057    | <i>SNORD12</i>      | 0 | -1.314  |

|          |               |          |          |        |                       |   |         |
|----------|---------------|----------|----------|--------|-----------------------|---|---------|
| children | 20q13.2       | 47988504 | 48099181 | 3745   | <i>KCNB1</i>          | 0 | -1.314  |
| children | 20q13.13      | 48120410 | 48184707 | 5740   | <i>PTGIS</i>          | 0 | -1.314  |
| children | 20q13.1-q13.2 | 48249482 | 48330421 | 9334   | <i>B4GALT5</i>        | 0 | -1.314  |
| children | 20q13.13      | 48429249 | 48508779 | 23315  | <i>SLC9A8</i>         | 0 | -1.314  |
| children | 20q13.13      | 48519928 | 48530276 | 9825   | <i>SPATA2</i>         | 0 | -1.314  |
| children | 20q13.13      | 48552913 | 48570422 | 55905  | <i>RNF114</i>         | 0 | -1.314  |
| children | 20q13.2       | 48599512 | 48605420 | 6615   | <i>SNAIL</i>          | 0 | -1.314  |
| children | 20q13.2       | 48697660 | 48729735 | 7335   | <i>UBE2V1</i>         | 0 | -1.314  |
| children | 20q13.2       | 48697660 | 48770335 | 387522 | <i>TMEM189-UBE2V1</i> | 0 | -1.314  |
| children | 20q13.2       | 48740273 | 48770335 | 387521 | <i>TMEM189</i>        | 0 | -1.314  |
| children | 20q13.1       | 48807119 | 48809227 | 1051   | <i>CEBPB</i>          | 0 | -1.314  |
| children | 20q13.1-q13.2 | 49126857 | 49201300 | 5770   | <i>PTPN1</i>          | 0 | -1.314  |
| children | 20q13.13      | 49202322 | 49202416 | 693230 | <i>MIR645</i>         | 0 | -1.314  |
| children | 20q13.13      | 49202644 | 49253455 | 140876 | <i>FAM65C</i>         | 0 | -1.314  |
| children | 20q13.13      | 49348080 | 49370278 | 84612  | <i>PARD6B</i>         | 0 | -1.314  |
| children | 20q13.13      | 49411430 | 49493714 | 55653  | <i>BCAS4</i>          | 0 | -1.314  |
| children | 20q13.13      | 49505454 | 49547527 | 23394  | <i>ADNP</i>           | 0 | -1.314  |
| children | 20q13.13      | 49551391 | 49575101 | 8813   | <i>DPM1</i>           | 0 | -1.314  |
| children | 20q13.13      | 49575350 | 49578399 | 27304  | <i>MOCS3</i>          | 0 | -1.314  |
| children | 20q13         | 49620192 | 49639675 | 3755   | <i>KCNG1</i>          | 0 | -1.314  |
| children | 20q13.2       | 50003493 | 50159258 | 4773   | <i>NFATC2</i>         | 0 | -1.314  |
| children | 20q13.2       | 50213313 | 50384950 | 10079  | <i>ATP9A</i>          | 0 | -1.314  |
| children | 20q13.2       | 50400582 | 50419048 | 57167  | <i>SALL4</i>          | 0 | -1.314  |
| children | 20q13.2       | 50700549 | 50808524 | 55734  | <i>ZFP64</i>          | 0 | -1.4405 |
| children | 20q13.2       | 51588945 | 52111869 | 128553 | <i>TSHZ2</i>          | 0 | -1.4968 |
| children | 20q13.2       | 52183609 | 52199636 | 7764   | <i>ZNF217</i>         | 0 | -1.4968 |
| children | 20q13.2       | 52491039 | 52492248 | 391257 | <i>SUMO1P1</i>        | 0 | -1.4997 |
| children | 20q13.2       | 52560078 | 52687304 | 8537   | <i>BCAS1</i>          | 0 | -1.4997 |
| children | 20q13         | 52769987 | 52790516 | 1591   | <i>CYP24A1</i>        | 0 | -1.4997 |
| children | 20q13.2       | 52824501 | 52836492 | 5203   | <i>PFDN4</i>          | 0 | -1.4997 |
| children | 20q13.2       | 53092010 | 53267710 | 55816  | <i>DOK5</i>           | 0 | -1.4997 |
| children | 20q13         | 54572412 | 54580528 | 140689 | <i>CBLN4</i>          | 0 | -1.4997 |
| children | 20q13.2-q13.3 | 54823787 | 54824871 | 4159   | <i>MC3R</i>           | 0 | -1.4997 |



|          |                 |          |          |           |                    |         |         |
|----------|-----------------|----------|----------|-----------|--------------------|---------|---------|
| children | 20q13.2         | 54933982 | 54943718 | 116151    | <i>FAM210B</i>     | 0       | -1.483  |
| children | 20q13           | 54944444 | 54967351 | 6790      | <i>AURKA</i>       | 0       | -1.483  |
| children | 20q13.2         | 54967426 | 54979582 | 1477      | <i>CSTFI</i>       | 0       | -1.483  |
| children | 20q13.31        | 54987167 | 55034396 | 57091     | <i>CASS4</i>       | 0       | -1.483  |
| children | 20q13.31        | 55043640 | 55093942 | 51507     | <i>RTFDC1</i>      | 0       | -1.483  |
| children | 20q13.2         | 55066547 | 55100981 | 140687    | <i>GCNT7</i>       | 0       | -1.483  |
| children | 20q13.31        | 55099784 | 55101208 | 200232    | <i>FAM209A</i>     | 0       | -1.483  |
| children | 20q13.31        | 55108301 | 55111574 | 388799    | <i>FAM209B</i>     | 0       | -1.483  |
| children | 20q13.2         | 55204357 | 55214338 | 7022      | <i>TFAP2C</i>      | 0       | -1.483  |
| children | 20q13           | 55743808 | 55841707 | 655       | <i>BMP7</i>        | 0       | -1.4115 |
| children | 20q13.31        | 55904830 | 55919049 | 23626     | <i>SPO11</i>       | 0       | -1.4115 |
| children | 20q13.31        | 55926144 | 55953519 | 8480      | <i>RAE1</i>        | 0       | -1.4115 |
| children | 20q13.31        | 55933495 | 55934878 | 100462983 | <i>MTRNR2L3</i>    | 0       | -1.4115 |
| children | 20q13.31        | 55966453 | 55984386 | 55544     | <i>RBM38</i>       | 0       | -1.4115 |
| children | 20q13.31        | 56071020 | 56100183 | 140690    | <i>CTCF</i>        | 0       | -1.4115 |
| children | 20q13.31        | 56136136 | 56141513 | 5105      | <i>PCK1</i>        | 0       | -1.4115 |
| children | 20q13.31        | 56178901 | 56195632 | 81030     | <i>ZBP1</i>        | 0       | -1.4115 |
| children | 20q13.31-q13.33 | 56223447 | 56265680 | 56937     | <i>PMEP1</i>       | 0       | -1.4115 |
| children | 20q13.32        | 56725982 | 56736183 | 128602    | <i>C20orf85</i>    | 0.2792  | -1.4115 |
| children | 20q13.32        | 56807832 | 56884495 | 55370     | <i>PPP4R1L</i>     | 0.2792  | -1.4115 |
| children | 20q13.32        | 56884770 | 56942563 | 57403     | <i>RAB22A</i>      | 0.2792  | -1.4115 |
| children | 20q13.33        | 56964174 | 57026156 | 9217      | <i>VAPB</i>        | 0.2792  | -1.4115 |
| children | 20q13.32        | 57034159 | 57089994 | 164284    | <i>APCDD1L</i>     | 0.2792  | -1.4115 |
| children | 20q13.32        | 57090434 | 57194948 | 149773    | <i>APCDD1L-AS1</i> | 0.2792  | -1.4115 |
| children | 20q13.32        | 57226308 | 57254582 | 8675      | <i>STX16</i>       | 0.2792  | -1.4115 |
| children | 20q13.32        | 57264186 | 57290900 | 79716     | <i>NPEPL1</i>      | 0.2792  | -1.4115 |
| children | 20q13.32        | 57392669 | 57392749 | 407022    | <i>MIR296</i>      | 0.2792  | -1.4115 |
| children | 20q13.32        | 57393280 | 57393368 | 100126296 | <i>MIR298</i>      | 0.2792  | -1.4115 |
| children | 20q13.32        | 57393972 | 57425958 | 149775    | <i>GNAS-AS1</i>    | 0.2792  | -1.4115 |
| children | 20q13.3         | 57414772 | 57486251 | 2778      | <i>GNAS</i>        | 0.24575 | -1.4115 |
| children | 20q13           | 57556262 | 57570188 | 51497     | <i>NELFCD</i>      | 0.2123  | -1.4115 |
| children | 20q13.32        | 57570241 | 57582309 | 1522      | <i>CTSZ</i>        | 0.2123  | -1.4115 |
| children | 20q13.32        | 57594308 | 57601709 | 81027     | <i>TUBB1</i>       | 0.2123  | -1.4115 |

|          |                 |          |          |           |                      |        |         |
|----------|-----------------|----------|----------|-----------|----------------------|--------|---------|
| children | 20q13.32        | 57603732 | 57607422 | 514       | <i>ATP5E</i>         | 0.2123 | -1.4115 |
| children | 20q13.32        | 57608199 | 57617901 | 51012     | <i>SLMO2</i>         | 0.2123 | -1.4115 |
| children | 20q13.32        | 57766074 | 57834167 | 128611    | <i>ZNF831</i>        | 0.2123 | -1.4115 |
| children | 20q13.2-q13.3   | 57875481 | 57901047 | 1908      | <i>EDN3</i>          | 0.2123 | -1.4115 |
| children | 20q13.32-q13.33 | 58152563 | 58422766 | 116154    | <i>PHACTR3</i>       | 0.2123 | -1.4115 |
| children | 20q13.33        | 58438611 | 58508718 | 10388     | <i>SYCP2</i>         | 0.2123 | -1.4115 |
| children | 20q13.33        | 58508818 | 58523702 | 63939     | <i>FAM217B</i>       | 0.2123 | -1.4115 |
| children | 20q13.3         | 58511886 | 58515352 | 5509      | <i>PPP1R3D</i>       | 0.2123 | -1.4115 |
| children | 20q13.33        | 58533470 | 58588168 | 60437     | <i>CDH26</i>         | 0.2123 | -1.4115 |
| children | 20q13.33        | 58630979 | 58648008 | 284756    | <i>C20orf197</i>     | 0.2123 | -1.4115 |
| children | 20q13.3         | 59827481 | 60515673 | 1002      | <i>CDH4</i>          | 0.3115 | -1.3833 |
| children | 20q13.33        | 60528601 | 60528718 | 100302168 | <i>MIR1257</i>       | 0.3115 | -1.355  |
| children | 20q13.33        | 60549853 | 60640866 | 6874      | <i>TAF4</i>          | 0.3115 | -1.3497 |
| children | 20q13.3         | 60718775 | 60757566 | 26039     | <i>SS18L1</i>        | 0.563  | -1.2837 |
| children | 20q13.33        | 60758080 | 60777810 | 26164     | <i>MTG2</i>          | 0.563  | -1.2837 |
| children | 20q13.33        | 60790016 | 60795323 | 11255     | <i>HRH3</i>          | 0.563  | -1.2837 |
| children | 20q13.33        | 60813540 | 60871269 | 9885      | <i>OSBPL2</i>        | 0.563  | -1.2837 |
| children | 20q13.33        | 60877951 | 60883918 | 11047     | <i>ADRM1</i>         | 0.563  | -1.2837 |
| children | 20q13.2-q13.3   | 60884115 | 60942368 | 3911      | <i>LAMA5</i>         | 0.563  | -1.2837 |
| children | 20q13.3         | 60962120 | 60963576 | 6227      | <i>RPS21</i>         | 0.563  | -1.2837 |
| children | 20q13.33        | 60963685 | 60982339 | 81928     | <i>CABLES2</i>       | 0.563  | -1.2837 |
| children | 20q13.33        | 60985292 | 61002629 | 140893    | <i>RBBP8NL</i>       | 0.563  | -1.2837 |
| children | 20q13.33        | 61038552 | 61051026 | 140628    | <i>GATA5</i>         | 0.563  | -1.2837 |
| children | 20q13.33        | 61141437 | 61148768 | 253868    | <i>C20orf166-AS1</i> | 0.563  | -1.2837 |
| children | 20q13.33        | 61151512 | 61151583 | 406904    | <i>MIR1-1</i>        | 0.563  | -1.2837 |
| children | 20q13.33        | 61162118 | 61162220 | 406923    | <i>MIR133A2</i>      | 0.563  | -1.2837 |
| children | 20q13.33        | 61273796 | 61303647 | 28231     | <i>SLCO4A1</i>       | 0.563  | -1.2837 |
| children | 20q13           | 61340188 | 61394123 | 4923      | <i>NTSR1</i>         | 0.563  | -1.2748 |
| children | 20q13.33        | 61427804 | 61431945 | 55257     | <i>MRGBP</i>         | 0.563  | -1.268  |
| children | 20q13.33        | 61431978 | 61436939 | 101409261 | <i>OGFR-AS1</i>      | 0.563  | -1.268  |
| children | 20q13.3         | 61436176 | 61445352 | 11054     | <i>OGFR</i>          | 0.563  | -1.268  |
| children | 20q13.3         | 61448413 | 61472511 | 1299      | <i>COL9A3</i>        | 0.563  | -1.268  |
| children | 20q13.33        | 61472365 | 61493115 | 10732     | <i>TCFL5</i>         | 0.563  | -1.268  |

|          |                                   |          |          |           |                     |        |         |
|----------|-----------------------------------|----------|----------|-----------|---------------------|--------|---------|
| children | 20q13.33                          | 61475917 | 61477543 | 100132911 | <i>DPH3P1</i>       | 0.563  | -1.268  |
| children | 20q13.33                          | 61509089 | 61557903 | 11083     | <i>DIDO1</i>        | 0.563  | -1.268  |
| children | 20q13.33                          | 61569440 | 61579827 | 54994     | <i>GID8</i>         | 0.563  | -1.268  |
| children | 20q13.33                          | 61583998 | 61599949 | 63910     | <i>SLC17A9</i>      | 0.563  | -1.268  |
| children | 20q13.33                          | 61637330 | 61638387 | 128408    | <i>BHLHE23</i>      | 0.563  | -1.268  |
| children | 20q13.33                          | 61640734 | 61716423 | 63930     | <i>LOC63930</i>     | 0.563  | -1.268  |
| children | 20q13.33                          | 61665568 | 61668380 | 100144596 | <i>LINC00029</i>    | 0.563  | -1.268  |
| children | 21p11                             | 10906186 | 10990943 | 7179      | <i>TPTE</i>         | 5.1376 | -0.53   |
| children | 21p11.2                           | 11020841 | 11098925 | 85318     | <i>BAGE3</i>        | 5.1376 | -0.53   |
| children | 21p11.1 not on reference assembly | 11057795 | 11098937 | 574       | <i>BAGE</i>         | 5.1376 | -0.53   |
| children | 21q11.2                           | 14410486 | 14490571 | 149992    | <i>ANKRD30BP2</i>   | 5.1376 | -0.53   |
| children | 21q11.2                           | 14982497 | 15013906 | 317754    | <i>POTED</i>        | 5.1376 | -0.53   |
| children | 21q11.2                           | 15316095 | 15352765 | 391267    | <i>ANKRD20A11P</i>  | 5.1376 | -0.53   |
| children | 21q11.2                           | 15481134 | 15579270 | 149998    | <i>LIP1</i>         | 5.1376 | -0.53   |
| children | 21q11                             | 15588465 | 15600693 | 54033     | <i>RBM11</i>        | 5.1376 | -0.53   |
| children | 21q11.2                           | 15646119 | 15663706 | 150000    | <i>ABCC13</i>       | 5.1376 | -0.53   |
| children | 21q11                             | 15743436 | 15755509 | 6782      | <i>HSPA13</i>       | 5.5068 | -0.53   |
| children | 21q11                             | 15857548 | 15918681 | 64092     | <i>SAMSN1</i>       | 5.5068 | -0.53   |
| children | 21q11.2                           | 15963712 | 16015428 | 388813    | <i>LOC388813</i>    | 5.5068 | -0.53   |
| children | 21q11.2                           | 16333555 | 16437126 | 8204      | <i>NRIP1</i>        | 5.5068 | -0.53   |
| children | 21q11.2                           | 17102343 | 17252390 | 29761     | <i>USP25</i>        | 5.6067 | -0.53   |
| children | 21q21.1                           | 17911408 | 17911489 | 407055    | <i>MIR99A</i>       | 5.6067 | -0.53   |
| children | 21q21.1                           | 17912147 | 17912231 | 406885    | <i>MIRLET7C</i>     | 5.6067 | -0.53   |
| children | 21q21.1                           | 17962556 | 17962645 | 406912    | <i>MIR125B2</i>     | 5.6067 | -0.53   |
| children | 21q21.1                           | 18885223 | 18942429 | 1525      | <i>CXADR</i>        | 5.6067 | -0.53   |
| children | 21q21.1                           | 18965967 | 18985268 | 10950     | <i>BTG3</i>         | 5.6067 | -0.53   |
| children | 21q21.1                           | 19149720 | 19164826 | 246312    | <i>C21orf91-OT1</i> | 5.6067 | -0.53   |
| children | 21q21.1                           | 19161283 | 19191703 | 54149     | <i>C21orf91</i>     | 5.6067 | -0.53   |
| children | 21q21.1                           | 19207988 | 19257925 | 54075     | <i>CHODL-ASI</i>    | 5.6067 | -0.53   |
| children | 21q11.2                           | 19289656 | 19639687 | 140578    | <i>CHODL</i>        | 5.9925 | -0.53   |
| children | 21q21.1                           | 19641432 | 19775970 | 5651      | <i>TMPRSS15</i>     | 6.2192 | -0.53   |
| children | 21q21.1                           | 22114907 | 22175426 | 387486    | <i>LINC00320</i>    | 5.936  | -0.8737 |
| children | 21q21.1                           | 22370632 | 22912517 | 4685      | <i>NCAM2</i>        | 5.936  | -0.8737 |

|          |               |          |          |           |                  |        |         |
|----------|---------------|----------|----------|-----------|------------------|--------|---------|
| children | 21q21.1       | 23095612 | 23109639 | 378828    | <i>LINC00317</i> | 5.936  | -0.8737 |
| children | 21q21.1       | 23470935 | 23488847 | 54143     | <i>LINC00308</i> | 5.936  | -0.8737 |
| children | 21q21.1-q21.2 | 26212863 | 26430056 | 339622    | <i>LOC339622</i> | 6.1652 | -0.53   |
| children | 21q21.3       | 26758132 | 26804013 | 54072     | <i>LINC00158</i> | 6.1652 | -0.53   |
| children | 21q21.3       | 26946291 | 26946356 | 406947    | <i>MIR155</i>    | 6.1652 | -0.53   |
| children | 21q21.3       | 26955086 | 26955536 | 282566    | <i>LINC00515</i> | 6.1652 | -0.53   |
| children | 21q21.3       | 26957967 | 26979801 | 54148     | <i>MRPL39</i>    | 6.1652 | -0.53   |
| children | 21q21.2       | 27011593 | 27086885 | 58494     | <i>JAM2</i>      | 6.1652 | -0.53   |
| children | 21q21.1       | 27096790 | 27107965 | 522       | <i>ATP5J</i>     | 6.1652 | -0.53   |
| children | 21q21.3       | 27107257 | 27144771 | 2551      | <i>GABPA</i>     | 6.1652 | -0.53   |
| children | 21q21.3       | 27252860 | 27512708 | 351       | <i>APP</i>       | 6.1652 | -0.53   |
| children | 21q21.2       | 27838527 | 27945581 | 116159    | <i>CYYRI</i>     | 6.1652 | -0.53   |
| children | 21q21.2       | 28208605 | 28217728 | 9510      | <i>ADAMTS1</i>   | 6.0015 | -0.4803 |
| children | 21q21.3       | 28290230 | 28339439 | 11096     | <i>ADAMTS5</i>   | 6.0015 | -0.4803 |
| children | 21q21.3       | 29094697 | 29123552 | 54088     | <i>LINC00113</i> | 6.0015 | -0.4803 |
| children | 21q21.3       | 29385681 | 29395528 | 246705    | <i>LINC00314</i> | 5.8286 | -0.4803 |
| children | 21q21.3       | 29911639 | 29912677 | 118421    | <i>LINC00161</i> | 5.8286 | -0.4803 |
| children | 21q21.3       | 30248385 | 30257695 | 29104     | <i>N6AMT1</i>    | 5.8286 | -0.4803 |
| children | 21q22.11      | 30300465 | 30365277 | 26046     | <i>LTN1</i>      | 5.8286 | -0.4803 |
| children | 21q22.11      | 30378079 | 30391685 | 10069     | <i>RWDD2B</i>    | 5.8286 | -0.4803 |
| children | 21q22.11      | 30396937 | 30426807 | 10600     | <i>USP16</i>     | 5.8286 | -0.4803 |
| children | 21q22.11      | 30428642 | 30446118 | 10694     | <i>CCT8</i>      | 5.8286 | -0.4803 |
| children | 21q22.3       | 30449791 | 30548210 | 56911     | <i>MAP3K7CL</i>  | 5.8286 | -0.4803 |
| children | 21q22.11      | 30565814 | 30660526 | 193629    | <i>LINC00189</i> | 5.8286 | -0.4803 |
| children | 21q22.11      | 30671115 | 30718469 | 571       | <i>BACH1</i>     | 5.8286 | -0.4803 |
| children | 21q22.11      | 30909253 | 31312282 | 2897      | <i>GRIK1</i>     | 5.8286 | -0.4803 |
| children | 21q22.11      | 30968359 | 31003067 | 100379661 | <i>GRIK1-AS2</i> | 5.8286 | -0.4803 |
| children | 21q22.11      | 31120493 | 31136325 | 642976    | <i>GRIK1-AS1</i> | 5.8286 | -0.4803 |
| children | 21q22.11      | 31538240 | 31538971 | 26285     | <i>CLDN17</i>    | 5.8286 | -0.4803 |
| children | 21q22.11      | 31581468 | 31584101 | 266919    | <i>LINC00307</i> | 5.8286 | -0.4803 |
| children | 21q22.11      | 31586323 | 31588469 | 9073      | <i>CLDN8</i>     | 5.8286 | -0.4803 |
| children | 21q22.11      | 31653626 | 31655276 | 643803    | <i>KRTAP24-1</i> | 5.8286 | -0.4803 |
| children | 21q22.11      | 31661462 | 31661832 | 100131902 | <i>KRTAP25-1</i> | 5.8286 | -0.4803 |

|          |          |          |          |           |                  |        |         |
|----------|----------|----------|----------|-----------|------------------|--------|---------|
| children | 21q22.11 | 31691449 | 31692607 | 388818    | <i>KRTAP26-1</i> | 5.8286 | -0.4803 |
| children | 21q22.11 | 31709330 | 31710012 | 643812    | <i>KRTAP27-1</i> | 5.8286 | -0.4803 |
| children | 21q22.1  | 31720716 | 31720924 | 337963    | <i>KRTAP23-1</i> | 5.8286 | -0.4803 |
| children | 21q22.1  | 31743708 | 31744557 | 337959    | <i>KRTAP13-2</i> | 5.8286 | -0.4803 |
| children | 21q22.1  | 31768391 | 31769138 | 140258    | <i>KRTAP13-1</i> | 5.8286 | -0.4803 |
| children | 21q22.1  | 31797710 | 31798230 | 337960    | <i>KRTAP13-3</i> | 5.8286 | -0.4803 |
| children | 21q22.1  | 31802593 | 31803076 | 284827    | <i>KRTAP13-4</i> | 5.8286 | -0.4803 |
| children | 21q22.1  | 31812645 | 31813098 | 254950    | <i>KRTAP15-1</i> | 5.8286 | -0.4803 |
| children | 21q22.1  | 31852363 | 31852636 | 337882    | <i>KRTAP19-1</i> | 5.8286 | -0.4803 |
| children | 21q22.1  | 31859508 | 31859667 | 337969    | <i>KRTAP19-2</i> | 5.8286 | -0.4803 |
| children | 21q22.1  | 31863781 | 31864275 | 337970    | <i>KRTAP19-3</i> | 5.8286 | -0.4803 |
| children | 21q22.1  | 31869173 | 31869428 | 337971    | <i>KRTAP19-4</i> | 5.8286 | -0.4803 |
| children | 21q22.1  | 31874189 | 31874408 | 337972    | <i>KRTAP19-5</i> | 5.8286 | -0.4803 |
| children | 21q22.1  | 31913853 | 31914183 | 337973    | <i>KRTAP19-6</i> | 5.8286 | -0.4803 |
| children | 21q22.1  | 31933416 | 31933608 | 337974    | <i>KRTAP19-7</i> | 5.8286 | -0.4803 |
| children | 21q22.11 | 31962423 | 31962716 | 100288287 | <i>KRTAP22-2</i> | 5.8286 | -0.4803 |
| children | 21q22.1  | 31964758 | 31965374 | 337968    | <i>KRTAP6-3</i>  | 5.8286 | -0.4803 |
| children | 21q22.1  | 31971004 | 31971193 | 337967    | <i>KRTAP6-2</i>  | 5.8286 | -0.4803 |
| children | 21q22.1  | 31973439 | 31973586 | 337979    | <i>KRTAP22-1</i> | 5.8286 | -0.4803 |
| children | 21q22.1  | 31986004 | 31986223 | 337966    | <i>KRTAP6-1</i>  | 5.8286 | -0.4803 |
| children | 21q22.1  | 31988773 | 31988944 | 337975    | <i>KRTAP20-1</i> | 5.8286 | -0.4803 |
| children | 21q22.11 | 31992945 | 31993169 | 100151643 | <i>KRTAP20-4</i> | 5.8286 | -0.4803 |
| children | 21q22.1  | 32007582 | 32007780 | 337976    | <i>KRTAP20-2</i> | 5.8286 | -0.4803 |
| children | 21q22.11 | 32015182 | 32015455 | 337985    | <i>KRTAP20-3</i> | 5.8286 | -0.4803 |
| children | 21q22.11 | 32090842 | 32091095 | 100288323 | <i>KRTAP21-3</i> | 5.8286 | -0.4803 |
| children | 21q22.1  | 32119268 | 32119520 | 337978    | <i>KRTAP21-2</i> | 5.8286 | -0.4803 |
| children | 21q22.1  | 32127456 | 32127696 | 337977    | <i>KRTAP21-1</i> | 5.8286 | -0.4803 |
| children | 21q22.1  | 32185014 | 32185570 | 337879    | <i>KRTAP8-1</i>  | 5.8286 | -0.4803 |
| children | 21q22.11 | 32201357 | 32202051 | 337878    | <i>KRTAP7-1</i>  | 5.8286 | -0.4803 |
| children | 21q22.1  | 32252963 | 32253874 | 337880    | <i>KRTAP11-1</i> | 5.8286 | -0.4803 |
| children | 21q22.11 | 32410477 | 32410795 | 728299    | <i>KRTAP19-8</i> | 5.8286 | -0.4803 |
| children | 21q22.11 | 32490735 | 32931290 | 7074      | <i>TIAMI</i>     | 5.8286 | -0.4803 |
| children | 21q22.11 | 33031934 | 33041243 | 6647      | <i>SOD1</i>      | 5.8286 | -0.4803 |

|          |               |          |          |           |                   |        |         |
|----------|---------------|----------|----------|-----------|-------------------|--------|---------|
| children | 21q22.1       | 33043312 | 33104431 | 57466     | <i>SCAF4</i>      | 5.8286 | -0.4803 |
| children | 21q22.1       | 33245627 | 33376377 | 30811     | <i>HUNK</i>       | 5.8286 | -0.4803 |
| children | 21q22.11      | 33452793 | 33458608 | 100551499 | <i>LINC00159</i>  | 5.8286 | -0.4803 |
| children | 21q22.11      | 33640529 | 33651376 | 54069     | <i>MIS18A</i>     | 5.8286 | -0.4803 |
| children | 21q22.1       | 33664123 | 33684599 | 56246     | <i>MRAP</i>       | 5.8286 | -0.4803 |
| children | 21q22.11      | 33683329 | 33765312 | 9875      | <i>URBI</i>       | 5.8286 | -0.4803 |
| children | 21q22.11      | 33784744 | 33887710 | 59271     | <i>EVAIC</i>      | 5.8286 | -0.4803 |
| children | 21q22.1       | 33973983 | 33984913 | 56683     | <i>C21orf59</i>   | 5.8286 | -0.4803 |
| children | 21q22.2       | 34001068 | 34100250 | 8867      | <i>SYNJ1</i>      | 5.8286 | -0.4803 |
| children | 21q21.3       | 34106209 | 34144169 | 94104     | <i>PAXBP1</i>     | 5.8286 | -0.4803 |
| children | 21q22.11      | 34162983 | 34186053 | 56245     | <i>C21orf62</i>   | 5.8286 | -0.4803 |
| children | 21q22.11      | 34398215 | 34401503 | 10215     | <i>OLIG2</i>      | 5.3103 | -0.4803 |
| children | 21q22.11      | 34442449 | 34444728 | 116448    | <i>OLIG1</i>      | 5.3103 | -0.4803 |
| children | 21q22.11      | 34602199 | 34635062 | 3455      | <i>IFNAR2</i>     | 5.3185 | -0.4803 |
| children | 21q22.11      | 34637936 | 34638565 | 100288432 | <i>IL10RB-AS1</i> | 5.3185 | -0.4803 |
| children | 21q22.11      | 34638664 | 34669539 | 3588      | <i>IL10RB</i>     | 5.3185 | -0.4803 |
| children | 21q22.11      | 34697213 | 34732128 | 3454      | <i>IFNAR1</i>     | 5.2651 | -0.2279 |
| children | 21q22.11      | 34775201 | 34809828 | 3460      | <i>IFNGR2</i>     | 5.2651 | -0.2279 |
| children | 21q22.11      | 34821447 | 34852316 | 757       | <i>TMEM50B</i>    | 5.2651 | -0.2279 |
| children | 21q22.11      | 34860361 | 34863790 | 54943     | <i>DNAJC28</i>    | 5.2651 | -0.2279 |
| children | 21q22.11      | 34876237 | 34914464 | 2618      | <i>GART</i>       | 5.2651 | -0.2279 |
| children | 21q22.11      | 34915343 | 34932973 | 6651      | <i>SON</i>        | 5.2651 | -0.2279 |
| children | 21q22.1       | 34949858 | 34961014 | 29980     | <i>DONSON</i>     | 5.2651 | -0.2279 |
| children | 21q21.3       | 34961647 | 35014160 | 9946      | <i>CRYZL1</i>     | 5.2651 | -0.2279 |
| children | 21q22.1-q22.2 | 35014783 | 35210802 | 6453      | <i>ITSN1</i>      | 5.2651 | -0.2279 |
| children | 21q22.11      | 35275756 | 35288158 | 539       | <i>ATP5O</i>      | 5.2651 | -0.2279 |
| children | 21q22.12      | 35445822 | 35478561 | 6526      | <i>SLC5A3</i>     | 5.3778 | -0.2279 |
| children | 21q22.11      | 35445822 | 35515334 | 64968     | <i>MRPS6</i>      | 5.3778 | -0.2279 |
| children | 21q22.11      | 35552977 | 35555546 | 114036    | <i>LINC00310</i>  | 5.3778 | -0.2279 |
| children | 21q22.12      | 35736322 | 35743440 | 9992      | <i>KCNE2</i>      | 5.3778 | -0.2279 |
| children | 21q22.12      | 35747748 | 35761452 | 54065     | <i>SMIM11</i>     | 5.3778 | -0.2279 |
| children | 21q22.12      | 35818985 | 35828107 | 3753      | <i>KCNE1</i>      | 5.3778 | -0.2279 |
| children | 21q22.12      | 35888739 | 35899308 | 1827      | <i>RCANI</i>      | 5.3778 | -0.2279 |

|          |          |          |          |           |                     |        |         |
|----------|----------|----------|----------|-----------|---------------------|--------|---------|
| children | 21q22.12 | 36041461 | 36090525 | 54102     | <i>CLIC6</i>        | 5.3778 | -0.2279 |
| children | 21q22.12 | 36096104 | 36109479 | 54064     | <i>LINC00160</i>    | 5.3778 | -0.2279 |
| children | 21q22.3  | 36160097 | 36260987 | 861       | <i>RUNX1</i>        | 5.3778 | -0.2279 |
| children | 21q22.12 | 36410232 | 36411723 | 80215     | <i>RUNX1-IT1</i>    | 4.8258 | -0.2279 |
| children | 21q22.12 | 37093012 | 37093106 | 768219    | <i>MIR802</i>       | 4.8258 | -0.2279 |
| children | 21q22.13 | 37406838 | 37433116 | 54093     | <i>SETD4</i>        | 4.8258 | -0.2279 |
| children | 21q22.12 | 37441939 | 37498938 | 100133286 | <i>LOC100133286</i> | 4.8258 | -0.2279 |
| children | 21q22.13 | 37442221 | 37445475 | 873       | <i>CBRI</i>         | 4.8258 | -0.2279 |
| children | 21q22.2  | 37507262 | 37518860 | 874       | <i>CBR3</i>         | 4.8258 | -0.2279 |
| children | 21q22.2  | 37536838 | 37666572 | 9980      | <i>DOPEY2</i>       | 4.8258 | -0.2279 |
| children | 21q22.13 | 37692486 | 37748944 | 23515     | <i>MORC3</i>        | 4.8258 | -0.2279 |
| children | 21q22.13 | 37757688 | 37789125 | 8208      | <i>CHAF1B</i>       | 4.8258 | -0.2279 |
| children | 21q22.3  | 37832919 | 37838739 | 23562     | <i>CLDN14</i>       | 4.8258 | -0.2279 |
| children | 21q22.13 | 38071432 | 38118219 | 6493      | <i>SIM2</i>         | 4.8258 | -0.2279 |
| children | 21q22.13 | 38123188 | 38338956 | 3141      | <i>HLCS</i>         | 4.8258 | -0.2279 |
| children | 21q22.2  | 38378862 | 38391958 | 53820     | <i>RIPPLY3</i>      | 4.8258 | -0.2279 |
| children | 21q22.2  | 38437663 | 38445103 | 51227     | <i>PIGP</i>         | 4.8258 | -0.2279 |
| children | 21q22.2  | 38445570 | 38575408 | 7267      | <i>TTC3</i>         | 4.8258 | -0.2279 |
| children | 21q22.13 | 38580803 | 38594037 | 257203    | <i>DSCR9</i>        | 4.8258 | -0.2279 |
| children | 21q22.2  | 38595725 | 38639833 | 10311     | <i>DSCR3</i>        | 4.8258 | -0.2279 |
| children | 21q22.13 | 38739858 | 38887679 | 1859      | <i>DYRK1A</i>       | 4.8258 | -0.2279 |
| children | 21q22.1  | 38996524 | 39288741 | 3763      | <i>KCNJ6</i>        | 4.8258 | -0.2279 |
| children | 21q22.2  | 39426312 | 39493454 | 10281     | <i>DSCR4</i>        | 4.8258 | -0.2279 |
| children | 21q22.2  | 39493544 | 39528605 | 84677     | <i>DSCR8</i>        | 4.8258 | -0.2279 |
| children | 21q22.13 | 39578249 | 39580738 | 259234    | <i>DSCR10</i>       | 4.8258 | -0.2279 |
| children | 21q22.2  | 39601836 | 39673746 | 3772      | <i>KCNJ15</i>       | 4.8258 | -0.2279 |
| children | 21q22.3  | 39739182 | 40033704 | 2078      | <i>ERG</i>          | 4.8258 | -0.2279 |
| children | 21q22.2  | 40110878 | 40124181 | 400866    | <i>LINC00114</i>    | 4.8258 | -0.2279 |
| children | 21q22.2  | 40177230 | 40196878 | 2114      | <i>ETS2</i>         | 4.8258 | -0.2279 |
| children | 21q22.3  | 40547371 | 40555440 | 8624      | <i>PSMG1</i>        | 4.8258 | -0.2279 |
| children | 21q22.2  | 40557403 | 40685712 | 54014     | <i>BRWD1</i>        | 4.8258 | -0.2279 |
| children | 21q22.2  | 40714240 | 40721047 | 3150      | <i>HMGNI</i>        | 4.8258 | -0.2279 |
| children | 21q22.3  | 40752212 | 40769815 | 7485      | <i>WRB</i>          | 4.8258 | -0.2279 |

|          |         |          |          |        |                   |         |         |
|----------|---------|----------|----------|--------|-------------------|---------|---------|
| children | 21q22.2 | 40777769 | 40816128 | 150082 | <i>LCA5L</i>      | 4.8258  | -0.2279 |
| children | 21q22.3 | 40817796 | 40887433 | 6450   | <i>SH3BGR</i>     | 4.8258  | -0.2279 |
| children | 21q22.3 | 41029246 | 41034816 | 10317  | <i>B3GALT5</i>    | 4.8258  | -0.2279 |
| children | 21q22.2 | 41117333 | 41174023 | 150084 | <i>IGSF5</i>      | 4.4885  | -0.2279 |
| children | 21q22.2 | 41239346 | 41301322 | 5121   | <i>PCP4</i>       | 4.45    | -0.5017 |
| children | 21q22.2 | 41384342 | 42219039 | 1826   | <i>DSCAM</i>      | 4.2202  | -0.5017 |
| children | 21q22.2 | 42513426 | 42519991 | 284835 | <i>LINC00323</i>  | 4.2202  | -0.4566 |
| children | 21q22.3 | 42539727 | 42654461 | 25825  | <i>BACE2</i>      | 4.2202  | -0.2279 |
| children | 21q22.2 | 42547157 | 42557166 | 191585 | <i>PLAC4</i>      | 4.2202  | -0.4566 |
| children | 21q22.3 | 42688660 | 42729654 | 54097  | <i>FAM3B</i>      | 4.5156  | -0.2279 |
| children | 21q22.3 | 42733949 | 42780869 | 4600   | <i>MX2</i>        | 4.5156  | -0.2279 |
| children | 21q22.3 | 42792484 | 42831141 | 4599   | <i>MX1</i>        | 4.5156  | -0.2279 |
| children | 21q22.3 | 42836477 | 42879992 | 7113   | <i>TMPRSS2</i>    | 4.2718  | -0.2279 |
| children | 21q22.3 | 43099461 | 43117496 | 54090  | <i>LINC00111</i>  | 3.6935  | -0.2279 |
| children | 21q22.3 | 43131679 | 43135935 | 150135 | <i>LINC00479</i>  | 3.6935  | -0.2279 |
| children | 21q22.3 | 43136595 | 43137742 | 54089  | <i>LINC00112</i>  | 3.6935  | -0.2279 |
| children | 21q22.3 | 43159528 | 43187249 | 54101  | <i>RIPK4</i>      | 3.4311  | -0.2279 |
| children | 21q22.3 | 43218384 | 43299591 | 63977  | <i>PRDM15</i>     | 3.4311  | -0.4749 |
| children | 21q22.3 | 43305218 | 43346799 | 25966  | <i>C2CD2</i>      | 3.4311  | -0.4749 |
| children | 21q22.3 | 43406939 | 43430496 | 49854  | <i>ZBTB21</i>     | 3.4311  | -0.4749 |
| children | 21q22.3 | 43442377 | 43445029 | 150142 | <i>ZNF295-AS1</i> | 3.4311  | -0.4749 |
| children | 21q22.3 | 43483067 | 43563105 | 89766  | <i>UMODL1</i>     | 3.4311  | -0.4749 |
| children | 21q22.3 | 43619798 | 43717354 | 9619   | <i>ABCG1</i>      | 3.2148  | -0.4749 |
| children | 21q22.3 | 43731776 | 43735706 | 7033   | <i>TFF3</i>       | 3.2148  | -0.4749 |
| children | 21q22.3 | 43766466 | 43771208 | 7032   | <i>TFF2</i>       | 3.2148  | -0.4749 |
| children | 21q22.3 | 43782390 | 43786644 | 7031   | <i>TFF1</i>       | 3.2148  | -0.4749 |
| children | 21q22.3 | 43791995 | 43809258 | 64699  | <i>TMPRSS3</i>    | 3.2148  | -0.4749 |
| children | 21q22.3 | 43823970 | 43867790 | 53347  | <i>UBASH3A</i>    | 3.2148  | -0.4749 |
| children | 21q22.3 | 43892596 | 43916464 | 89765  | <i>RSPHI</i>      | 3.2148  | -0.4749 |
| children | 21q22.3 | 43919741 | 44001550 | 54020  | <i>SLC37A1</i>    | 3.12805 | -0.4658 |
| children | 21q22.3 | 44073861 | 44195618 | 5152   | <i>PDE9A</i>      | 3.1298  | -0.4658 |
| children | 21q22.3 | 44263189 | 44299693 | 10785  | <i>WDR4</i>       | 3.1298  | -0.2279 |
| children | 21q22.3 | 44313377 | 44329773 | 4731   | <i>NDUFV3</i>     | 3.4661  | -0.2279 |



|          |         |          |          |           |                  |         |         |
|----------|---------|----------|----------|-----------|------------------|---------|---------|
| children | 21q22.3 | 44394619 | 44454041 | 5316      | <i>PKNOX1</i>    | 3.4661  | -0.2279 |
| children | 21q22.3 | 44473300 | 44496040 | 875       | <i>CBS</i>       | 3.4661  | -0.2279 |
| children | 21q22.3 | 44513065 | 44527688 | 7307      | <i>U2AF1</i>     | 3.4661  | -0.2279 |
| children | 21q22.3 | 44589117 | 44592920 | 1409      | <i>CRYAA</i>     | 3.4661  | -0.2279 |
| children | 21q22.3 | 44834397 | 44847002 | 150094    | <i>SIK1</i>      | 3.1298  | -0.498  |
| children | 21q22.3 | 44869903 | 44873771 | 284836    | <i>LINC00319</i> | 3.1915  | -0.498  |
| children | 21q22.3 | 44881973 | 44898103 | 114038    | <i>LINC00313</i> | 3.1915  | -0.498  |
| children | 21q22.3 | 44949071 | 45079374 | 11077     | <i>HSF2BP</i>    | 2.90345 | -0.4852 |
| children | 21q22.3 | 45079431 | 45115960 | 23076     | <i>RRP1B</i>     | 2.4669  | -0.4723 |
| children | 21q22.3 | 45138977 | 45182188 | 8566      | <i>PDXXK</i>     | 2.4669  | -0.4723 |
| children | 21q22.3 | 45193545 | 45196256 | 1476      | <i>CSTB</i>      | 2.4669  | -0.4723 |
| children | 21q22.3 | 45209417 | 45223983 | 8568      | <i>RRP1</i>      | 2.4669  | -0.4723 |
| children | 21q22.3 | 45285115 | 45407475 | 56894     | <i>AGPAT3</i>    | 2.4498  | -0.4723 |
| children | 21q22.3 | 45432205 | 45526432 | 7109      | <i>TRAPPC10</i>  | 2.4498  | -0.4723 |
| children | 21q22.3 | 45527207 | 45551063 | 5822      | <i>PWP2</i>      | 2.4498  | -0.4723 |
| children | 21q22.3 | 45553493 | 45565605 | 8209      | <i>C21orf33</i>  | 2.4498  | -0.4723 |
| children | 21q22.3 | 45646709 | 45660887 | 23308     | <i>ICOSLG</i>    | 2.4498  | -0.4491 |
| children | 21q22.3 | 45666221 | 45682099 | 29947     | <i>DNMT3L</i>    | 2.4498  | -0.4491 |
| children | 21q22.3 | 45705720 | 45718102 | 326       | <i>AIRE</i>      | 2.4498  | -0.4491 |
| children | 21q22.3 | 45719916 | 45747264 | 5211      | <i>PFKL</i>      | 2.3568  | -0.426  |
| children | 21q22.3 | 45748826 | 45758221 | 755       | <i>C21orf2</i>   | 1.9969  | -0.2212 |
| children | 21q22.3 | 45773483 | 45862964 | 7226      | <i>TRPM2</i>     | 2.2118  | -0.2212 |
| children | 21q22.3 | 45870868 | 45875167 | 100861510 | <i>LRRC3-AS1</i> | 2.2118  | -0.2212 |
| children | 21q22.3 | 45875368 | 45878739 | 81543     | <i>LRRC3</i>     | 2.2118  | -0.2212 |
| children | 21q22.3 | 45917774 | 46131495 | 54084     | <i>TSPEAR</i>    | 2.5588  | -0.2212 |
| children | 21q22.3 | 45959067 | 45960078 | 386677    | <i>KRTAP10-1</i> | 2.5588  | -0.2212 |
| children | 21q22.3 | 45970239 | 45971388 | 386679    | <i>KRTAP10-2</i> | 2.5588  | -0.2212 |
| children | 21q22.3 | 45977905 | 45978643 | 386682    | <i>KRTAP10-3</i> | 2.5588  | -0.2212 |
| children | 21q22.3 | 45993605 | 45995248 | 386672    | <i>KRTAP10-4</i> | 2.5588  | -0.2212 |
| children | 21q22.3 | 45999331 | 46000481 | 386680    | <i>KRTAP10-5</i> | 2.5588  | -0.2212 |
| children | 21q22.3 | 46011148 | 46012386 | 386674    | <i>KRTAP10-6</i> | 2.5588  | -0.2212 |
| children | 21q22.3 | 46020496 | 46022091 | 386675    | <i>KRTAP10-7</i> | 2.5588  | -0.2212 |
| children | 21q22.3 | 46031995 | 46032871 | 386681    | <i>KRTAP10-8</i> | 2.5588  | -0.2212 |

|          |         |          |          |           |                     |        |         |
|----------|---------|----------|----------|-----------|---------------------|--------|---------|
| children | 21q22.3 | 46047039 | 46048295 | 386676    | <i>KRTAP10-9</i>    | 2.5588 | -0.2212 |
| children | 21q22.3 | 46057272 | 46058372 | 353333    | <i>KRTAP10-10</i>   | 2.5588 | -0.2212 |
| children | 21q22.3 | 46066330 | 46067566 | 386678    | <i>KRTAP10-11</i>   | 2.5588 | -0.2212 |
| children | 21q22.3 | 46074129 | 46074576 | 386684    | <i>KRTAP12-4</i>    | 2.5588 | -0.2212 |
| children | 21q22.3 | 46077848 | 46078258 | 386683    | <i>KRTAP12-3</i>    | 2.5588 | -0.2212 |
| children | 21q22.3 | 46086105 | 46086844 | 353323    | <i>KRTAP12-2</i>    | 2.5588 | -0.2212 |
| children | 21q22.3 | 46101490 | 46102078 | 353332    | <i>KRTAP12-1</i>    | 2.5588 | -0.2212 |
| children | 21q22.3 | 46117086 | 46117959 | 386685    | <i>KRTAP10-12</i>   | 2.5588 | -0.2212 |
| children | 21q22.3 | 46188494 | 46221751 | 7327      | <i>UBE2G2</i>       | 2.5588 | -0.2212 |
| children | 21q22.3 | 46225531 | 46238044 | 6612      | <i>SUMO3</i>        | 2.5588 | -0.2212 |
| children | 21q22.3 | 46269499 | 46293818 | 754       | <i>PTTG1IP</i>      | 2.5588 | -0.2212 |
| children | 21q22.3 | 46305868 | 46340965 | 3689      | <i>ITGB2</i>        | 2.5588 | -0.2212 |
| children | 21q22.3 | 46359911 | 46396904 | 85395     | <i>FAM207A</i>      | 2.5588 | -0.2212 |
| children | 21q22.3 | 46409778 | 46414001 | 727699    | <i>LINC00163</i>    | 2.5588 | -0.2212 |
| children | 21q22.3 | 46419121 | 46424642 | 378825    | <i>LINC00162</i>    | 2.5588 | -0.2212 |
| children | 21q22.3 | 46490869 | 46493126 | 728039    | <i>SSR4P1</i>       | 2.5588 | -0.2212 |
| children | 21q22.3 | 46494492 | 46646478 | 104       | <i>ADARB1</i>       | 2.5588 | -0.2212 |
| children | 21q22.3 | 46683842 | 46707811 | 23275     | <i>POFUT2</i>       | 2.5588 | -0.2212 |
| children | 21q22.3 | 46707966 | 46717269 | 642852    | <i>LOC642852</i>    | 2.5588 | -0.2212 |
| children | 21q22.3 | 46825051 | 46933634 | 80781     | <i>COL18A1</i>      | 2.281  | -0.2212 |
| children | 21q22.3 | 46839630 | 46844955 | 378832    | <i>COL18A1-AS1</i>  | 1.9969 | -0.2212 |
| children | 21q22.3 | 46934628 | 46954542 | 6573      | <i>SLC19A1</i>      | 2.281  | -0.2212 |
| children | 21q22.3 | 47247754 | 47256333 | 100129027 | <i>LOC100129027</i> | 2.281  | -0.2212 |
| children | 21q22.3 | 47269874 | 47362368 | 54039     | <i>PCBP3</i>        | 2.281  | -0.2212 |
| children | 21q22.3 | 47401662 | 47424963 | 1291      | <i>COL6A1</i>       | 1.7077 | -0.2212 |
| children | 21q22.3 | 47518032 | 47549719 | 1292      | <i>COL6A2</i>       | 2.0126 | -0.2212 |
| children | 21q22.3 | 47556175 | 47575481 | 10841     | <i>FTCD</i>         | 2.0126 | -0.2212 |
| children | 21q22.3 | 47581061 | 47604373 | 84221     | <i>SPATCIL</i>      | 1.7077 | -0.2212 |
| children | 21q22.3 | 47608359 | 47648738 | 4047      | <i>LSS</i>          | 1.9987 | -0.2212 |
| children | 21q22.3 | 47649144 | 47671615 | 114044    | <i>MCM3AP-AS1</i>   | 1.9987 | -0.2212 |
| children | 21q22.3 | 47655038 | 47705308 | 8888      | <i>MCM3AP</i>       | 1.9987 | -0.2212 |
| children | 21q22.3 | 47706243 | 47712435 | 54059     | <i>YBEY</i>         | 1.9987 | -0.2212 |
| children | 21q22.3 | 47721043 | 47743813 | 54058     | <i>C21orf58</i>     | 1.9987 | -0.2212 |

|          |              |           |           |           |                   |         |         |
|----------|--------------|-----------|-----------|-----------|-------------------|---------|---------|
| children | 21q22.3      | 47744035  | 47865682  | 5116      | <i>PCNT</i>       | 1.9987  | -0.2212 |
| children | 21q22.3      | 47878861  | 47966219  | 23181     | <i>DIP2A</i>      | 1.9987  | -0.2212 |
| children | 21q22.3      | 47882383  | 47889218  | 100862692 | <i>DIP2A-IT1</i>  | 1.9987  | -0.2212 |
| children | 21q22.3      | 48018530  | 48025035  | 6285      | <i>S100B</i>      | 1.9987  | -0.2212 |
| children | 21q22.3      | 48055506  | 48075009  | 3275      | <i>PRMT2</i>      | 1.9987  | -0.2212 |
| children | 21p11.2      | 9907188   | 9968594   | 100132288 | <i>TEKT4P2</i>    | 4.9153  | -0.53   |
| children | 22q11.22     | 22599191  | 22599927  | 7441      | <i>VPREB1</i>     | 0.2102  | -1.0744 |
| children | 22q11.22     | 22838770  | 22863505  | 140883    | <i>ZNF280B</i>    | 0.2102  | -1.6948 |
| children | 22q11.22     | 22868060  | 22874624  | 129025    | <i>ZNF280A</i>    | 0.2102  | -1.6948 |
| children | 22q11.22     | 22890117  | 22901768  | 23532     | <i>PRAME</i>      | 0.21105 | -1.6948 |
| children | 3q12.2       | 100053561 | 100074478 | 56954     | <i>NIT2</i>       | 0       | -1.0674 |
| children | 3q12.2       | 100082302 | 100120242 | 9868      | <i>TOMM70A</i>    | 0       | -1.0674 |
| children | 3q12.2       | 100120036 | 100175170 | 348801    | <i>LNPI</i>       | 0       | -1.0674 |
| children | 3q12.2       | 100211462 | 100296296 | 55076     | <i>TMEM45A</i>    | 0       | -1.0674 |
| children | 3q12.2       | 100428133 | 100467811 | 10342     | <i>TFG</i>        | 0       | -1.0674 |
| children | 3q12         | 100468178 | 100712334 | 25890     | <i>ABI3BP</i>     | 0       | -1.0674 |
| children | 3q12.2-q12.3 | 100941389 | 101039419 | 50939     | <i>IMPG2</i>      | 0       | -1.0674 |
| children | 3q12         | 101043032 | 101232085 | 57337     | <i>SENP7</i>      | 0       | -1.0674 |
| children | 3q12.3       | 101237710 | 101242731 | 131909    | <i>FAM172BP</i>   | 0       | -1.0674 |
| children | 3q12.3       | 101280679 | 101285290 | 54931     | <i>TRMT10C</i>    | 0       | -1.0674 |
| children | 3q12.3       | 101293041 | 101313281 | 57092     | <i>PCNP</i>       | 0       | -1.0674 |
| children | 3q12.3       | 101368282 | 101395988 | 27107     | <i>ZBTB11</i>     | 0       | -1.0657 |
| children | 3q12.3       | 101395273 | 101398057 | 100009676 | <i>ZBTB11-AS1</i> | 0       | -1.0657 |
| children | 3q12         | 101399933 | 101405563 | 6152      | <i>RPL24</i>      | 0       | -1.0657 |
| children | 3q12.3       | 101431277 | 101432260 | 285359    | <i>PDCL3P4</i>    | 0       | -1.0657 |
| children | 3q12.3       | 101443436 | 101489406 | 79598     | <i>CEP97</i>      | 0       | -1.0657 |
| children | 3q12.3       | 101498028 | 101547075 | 91775     | <i>NXPE3</i>      | 0       | -1.0657 |
| children | 3p12-q12     | 101546833 | 101579869 | 64332     | <i>NFKBIZ</i>     | 0       | -1.0657 |
| children | 3q12.3       | 101659702 | 101716770 | 152225    | <i>LOC152225</i>  | 0       | -1.0657 |
| children | 3q12.3       | 102153858 | 102198685 | 131368    | <i>ZPLD1</i>      | 0       | -1.0657 |
| children | 3q13.1       | 105085556 | 105244230 | 214       | <i>ALCAM</i>      | 0       | -1.579  |
| children | 3q13.11      | 105377108 | 105587887 | 868       | <i>CBLB</i>       | 0       | -1.579  |
| children | 3q13.12      | 106828636 | 106959485 | 100302640 | <i>LINC00882</i>  | 0       | -1.579  |

|          |               |           |           |           |                  |   |         |
|----------|---------------|-----------|-----------|-----------|------------------|---|---------|
| children | 3q13.12       | 106959538 | 106967719 | 344595    | <i>LINC00883</i> | 0 | -1.579  |
| children | 3q13.12       | 107096187 | 107097481 | 84692     | <i>CCDC54</i>    | 0 | -1.5103 |
| children | 3q13.1        | 107241782 | 107530176 | 56987     | <i>BBX</i>       | 0 | -1.5103 |
| children | 3q13.12       | 107560508 | 107596915 | 151658    | <i>LINC00635</i> | 0 | -1.5103 |
| children | 3q13.12       | 107602051 | 107647753 | 285205    | <i>LINC00636</i> | 0 | -1.5103 |
| children | 3q13.1-q13.2  | 107761940 | 107809935 | 961       | <i>CD47</i>      | 0 | -1.5103 |
| children | 3q13.13       | 107879658 | 107941417 | 55081     | <i>IFT57</i>     | 0 | -1.5103 |
| children | 3q13.13       | 108021331 | 108097131 | 11148     | <i>HHLA2</i>     | 0 | -1.5103 |
| children | 3q13.13       | 108099215 | 108248169 | 22989     | <i>MYH15</i>     | 0 | -1.5103 |
| children | 3q13.13       | 108268717 | 108308491 | 57650     | <i>KIAA1524</i>  | 0 | -1.5103 |
| children | 3q13.13       | 108308336 | 108413693 | 9666      | <i>DZIP3</i>     | 0 | -1.5103 |
| children | 3q13.1        | 108474485 | 108476130 | 84666     | <i>RETNLB</i>    | 0 | -1.5103 |
| children | 3q13          | 108541544 | 108573852 | 50852     | <i>TRATI</i>     | 0 | -1.5103 |
| children | 3q13.1        | 108626641 | 108672677 | 9626      | <i>GUCAIC</i>    | 0 | -1.5103 |
| children | 3q13          | 108677086 | 108836993 | 27136     | <i>MORC1</i>     | 0 | -1.5103 |
| children | 3q13.13       | 108855560 | 108868951 | 401081    | <i>FLJ22763</i>  | 0 | -1.5103 |
| children | 3q13.13       | 108897011 | 108904108 | 677779    | <i>LINC00488</i> | 0 | -1.5103 |
| children | 3q13.13       | 109012634 | 109035364 | 151871    | <i>DPPA2</i>     | 0 | -1.5103 |
| children | 3q13.13       | 109044987 | 109056419 | 55211     | <i>DPPA4</i>     | 0 | -1.5103 |
| children | 3q13.13       | 110764162 | 110788806 | 100506555 | <i>PVRL3-AS1</i> | 0 | -1.5103 |
| children | 3q13          | 110790605 | 110856407 | 25945     | <i>PVRL3</i>     | 0 | -1.5103 |
| children | 3q13.13-q13.2 | 111260925 | 111371206 | 10225     | <i>CD96</i>      | 0 | -1.478  |
| children | 3q13.2        | 111311746 | 111314182 | 79413     | <i>ZBED2</i>     | 0 | -1.478  |
| children | 3q13.2        | 111393522 | 111565294 | 257068    | <i>PLCXD2</i>    | 0 | -1.478  |
| children | 3q13.2        | 111451326 | 111695364 | 90102     | <i>PHLDB2</i>    | 0 | -1.478  |
| children | 3q13.2        | 111697722 | 111712215 | 55347     | <i>ABHD10</i>    | 0 | -1.478  |
| children | 3q13.2        | 111717585 | 111732735 | 29114     | <i>TAGLN3</i>    | 0 | -1.478  |
| children | 3q13.2        | 111758464 | 111800116 | 344805    | <i>TMPRSS7</i>   | 0 | -1.478  |
| children | 3q13.2        | 111805181 | 111837044 | 79669     | <i>C3orf52</i>   | 0 | -1.478  |
| children | 3q13.2        | 111831647 | 111831745 | 693152    | <i>MIR567</i>    | 0 | -1.478  |
| children | 3q13.2        | 111839687 | 111852152 | 257144    | <i>GCSAM</i>     | 0 | -1.478  |
| children | 3q13.2        | 111859751 | 112013074 | 285335    | <i>SLC9C1</i>    | 0 | -1.478  |
| children | 3q13.2        | 112051915 | 112081658 | 4345      | <i>CD200</i>     | 0 | -1.478  |

|          |         |           |           |           |                     |   |         |
|----------|---------|-----------|-----------|-----------|---------------------|---|---------|
| children | 3q13.2  | 112182812 | 112218408 | 151888    | <i>BTLA</i>         | 0 | -1.478  |
| children | 3q13.2  | 112280856 | 112303284 | 55032     | <i>SLC35A5</i>      | 0 | -1.2628 |
| children | 3q13.2  | 112323232 | 112359990 | 151887    | <i>CCDC80</i>       | 0 | -1.2628 |
| children | 3q13.2  | 112534555 | 112564797 | 344807    | <i>CD200R1L</i>     | 0 | -1.2628 |
| children | 3q13.2  | 112641531 | 112693937 | 131450    | <i>CD200R1</i>      | 0 | -1.2628 |
| children | 3q13.2  | 112709799 | 112720221 | 29083     | <i>GTPBP8</i>       | 0 | -1.2628 |
| children | 3q13.2  | 112721291 | 112738555 | 25871     | <i>C3orf17</i>      | 0 | -1.2628 |
| children | 3q13.2  | 112930311 | 113006310 | 91653     | <i>BOC</i>          | 0 | -1.2628 |
| children | 3q13.2  | 113161564 | 113234034 | 152185    | <i>SPICE1</i>       | 0 | -1.2628 |
| children | 3q13.2  | 113251217 | 113348422 | 54847     | <i>SIDT1</i>        | 0 | -1.2628 |
| children | 3q13.2  | 113367232 | 113415493 | 205717    | <i>KIAA2018</i>     | 0 | -1.2628 |
| children | 3q13.2  | 113435306 | 113465146 | 80218     | <i>NAA50</i>        | 0 | -1.2628 |
| children | 3q13.31 | 113465865 | 113530905 | 523       | <i>ATP6V1A</i>      | 0 | -1.2628 |
| children | 3q13.31 | 113557680 | 113666021 | 54762     | <i>GRAMD1C</i>      | 0 | -1.2628 |
| children | 3q25    | 153742189 | 153838999 | 100507524 | <i>ARHGEF26-AS1</i> | 0 | -1.0719 |
| children | 3q25.2  | 153838791 | 153975616 | 26084     | <i>ARHGEF26</i>     | 0 | -1.0719 |
| children | 3q25.2  | 153993456 | 154042286 | 170506    | <i>DHX36</i>        | 0 | -1.0719 |
| children | 3q25.2  | 154055460 | 154147504 | 344758    | <i>GPR149</i>       | 0 | -1.0719 |
| children | 3q25.2  | 154797435 | 154901518 | 4311      | <i>MME</i>          | 0 | -1.0719 |
| children | 3q25    | 155008020 | 155011489 | 100507537 | <i>LOC100507537</i> | 0 | -1.0719 |
| children | 3q25.31 | 155197670 | 155394105 | 23007     | <i>PLCH1</i>        | 0 | -1.0719 |
| children | 3q25.31 | 155480400 | 155524076 | 285315    | <i>C3orf33</i>      | 0 | -1.0719 |
| children | 3q25.31 | 155544300 | 155572248 | 9197      | <i>SLC33A1</i>      | 0 | -1.0719 |
| children | 3q24    | 155588324 | 155655520 | 8833      | <i>GMPS</i>         | 0 | -1.0719 |
| children | 3q26.1  | 155838336 | 156256927 | 7881      | <i>KCNAB1</i>       | 0 | -1.0719 |
| children | 3q25.31 | 156257341 | 156272989 | 6747      | <i>SSR3</i>         | 0 | -1.0719 |
| children | 3q25.31 | 156390959 | 156393502 | 100287227 | <i>TIPARP-AS1</i>   | 0 | -1.0719 |
| children | 3q25.31 | 156392204 | 156424557 | 25976     | <i>TIPARP</i>       | 0 | -1.0719 |
| children | 3q25.31 | 156465131 | 156534851 | 730091    | <i>LINC00886</i>    | 0 | -1.0719 |
| children | 3q25.31 | 156527059 | 156529810 | 647033    | <i>PA2GAP4</i>      | 0 | -1.0719 |
| children | 3q25.31 | 156544095 | 156763918 | 389170    | <i>LEKRI</i>        | 0 | -1.0719 |
| children | 3q25.31 | 156799455 | 156840791 | 339894    | <i>LINC00880</i>    | 0 | -1.0719 |
| children | 3q25.31 | 156807669 | 156818924 | 100498859 | <i>LINC00881</i>    | 0 | -1.0719 |

|          |              |           |           |           |                     |        |         |
|----------|--------------|-----------|-----------|-----------|---------------------|--------|---------|
| children | 3q25.31      | 156865344 | 156878549 | 57018     | <i>CCNLI</i>        | 0      | -1.0719 |
| children | 3q24-q25     | 156977531 | 157217445 | 79674     | <i>VEPH1</i>        | 0      | -1.0719 |
| children | 3q25         | 157154579 | 157161417 | 5806      | <i>PTX3</i>         | 0      | -1.0719 |
| children | 3q25.32      | 157813799 | 157823952 | 6474      | <i>SHOX2</i>        | 0      | -1.0719 |
| children | 3q25.32      | 157827840 | 158262624 | 51319     | <i>RSRC1</i>        | 0      | -1.0719 |
| children | 3q25.1       | 158288952 | 158324249 | 4291      | <i>MLF1</i>         | 0      | -1.0719 |
| children | 3q25         | 158362316 | 158410360 | 85476     | <i>GFMI</i>         | 0      | -1.0719 |
| children | 3q25.32      | 158384202 | 158390482 | 56925     | <i>LXN</i>          | 0      | -1.0719 |
| children | 3q25.32      | 158414896 | 158450275 | 5918      | <i>RARRES1</i>      | 0      | -1.0719 |
| children | 3q25.32      | 158519714 | 158547508 | 64747     | <i>MFSD1</i>        | 0      | -1.0719 |
| children | 3q25.32      | 158787040 | 158981535 | 654502    | <i>IQCJ</i>         | 0      | -1.0719 |
| children | 3q26.31      | 171757417 | 172118492 | 64778     | <i>FNDC3B</i>       | 0      | -1.2507 |
| children | 3q26.31      | 172161080 | 172166246 | 2693      | <i>GHSR</i>         | 0      | -1.2507 |
| children | 3q26         | 172223297 | 172241297 | 8743      | <i>TNFSF10</i>      | 0      | -1.2507 |
| children | 3q26.31      | 172348434 | 172429008 | 57552     | <i>NCEH1</i>        | 0      | -1.2507 |
| children | 3q26.1-q26.2 | 172468474 | 172539264 | 1894      | <i>ECT2</i>         | 0      | -1.2507 |
| children | 3q26.31      | 172607146 | 172859058 | 83893     | <i>SPATA16</i>      | 0      | -1.2507 |
| children | 3q26.31      | 173116237 | 174001139 | 22871     | <i>NLGN1</i>        | 0      | -1.2507 |
| children | 3q26.31      | 174577110 | 175523428 | 254827    | <i>NAALADL2</i>     | 0      | -1.1607 |
| children | 3q26.3       | 174797101 | 174833032 | 100862679 | <i>NAALADL2-AS3</i> | 0      | -1.2851 |
| children | 3q12.1       | 98451079  | 98514689  | 10402     | <i>ST3GAL6</i>      | 0      | -1.0804 |
| children | 3q12.1       | 98514813  | 98620533  | 131566    | <i>DCBLD2</i>       | 0      | -1.0804 |
| children | 3q12.3       | 99357439  | 99515577  | 1295      | <i>COL8A1</i>       | 0      | -1.0757 |
| children | 3q12.1       | 99536677  | 99897476  | 84319     | <i>CMSSI</i>        | 0      | -1.0757 |
| children | 3q12.1       | 99551987  | 99833357  | 11259     | <i>FILIP1L</i>      | 0      | -1.0757 |
| children | 3q12.1       | 99904667  | 99913030  | 644444    | <i>TMEM30C</i>      | 0      | -1.0757 |
| children | 3q12.2       | 99979660  | 100044096 | 55773     | <i>TBC1D23</i>      | 0      | -1.0674 |
| children | 4q23         | 100010007 | 100222513 | 100507053 | <i>LOC100507053</i> | 0.2117 | -1.2396 |
| children | 4q22         | 100044807 | 100065449 | 127       | <i>ADH4</i>         | 0.2117 | -1.2396 |
| children | 4q24         | 100081750 | 100082804 | 359806    | <i>PCNAPI</i>       | 0.2117 | -1.2396 |
| children | 4q23         | 100123794 | 100140403 | 130       | <i>ADH6</i>         | 0.2117 | -1.2396 |
| children | 4q23         | 100197522 | 100212185 | 124       | <i>ADH1A</i>        | 0.2117 | -1.2396 |
| children | 4q23         | 100227543 | 100242599 | 125       | <i>ADH1B</i>        | 0.2117 | -1.2396 |

|          |          |           |           |           |                  |         |         |
|----------|----------|-----------|-----------|-----------|------------------|---------|---------|
| children | 4q23     | 100257648 | 100274202 | 126       | <i>ADH1C</i>     | 0.2117  | -1.2396 |
| children | 4q23-q24 | 100333417 | 100356291 | 131       | <i>ADH7</i>      | 0.2117  | -1.2396 |
| children | 4q23     | 100432160 | 100463460 | 84103     | <i>C4orf17</i>   | 0.2117  | -1.2396 |
| children | 4q23     | 100467863 | 100484825 | 93587     | <i>TRMT10A</i>   | 0.2117  | -1.2396 |
| children | 4q24     | 100485234 | 100545154 | 4547      | <i>MTTP</i>      | 0.2117  | -1.2396 |
| children | 4q25-q27 | 100737980 | 100791346 | 27071     | <i>DAPP1</i>     | 0.2117  | -1.2396 |
| children | 4q23     | 100799494 | 100815703 | 8649      | <i>LAMTOR3</i>   | 0.2117  | -1.2396 |
| children | 4q23     | 100817406 | 100867883 | 79982     | <i>DNAJB14</i>   | 0.2117  | -1.2396 |
| children | 4q24     | 100869243 | 100871512 | 3015      | <i>H2AFZ</i>     | 0.2117  | -1.2396 |
| children | 4q24     | 101107026 | 101111655 | 115265    | <i>DDIT4L</i>    | 0.2117  | -1.2396 |
| children | 4q24     | 101316497 | 101439250 | 51705     | <i>EMCN</i>      | 0.2117  | -1.2396 |
| children | 4q24     | 101944586 | 102268628 | 5530      | <i>PPP3CA</i>    | 0.42715 | -1.2396 |
| children | 4q24     | 102268933 | 102270040 | 90024     | <i>FLJ20021</i>  | 0.4462  | -1.2396 |
| children | 4q24     | 102711763 | 102995969 | 55024     | <i>BANK1</i>     | 0.4462  | -1.2396 |
| children | 4q24     | 103172197 | 103266410 | 64116     | <i>SLC39A8</i>   | 0.4462  | -1.2396 |
| children | 4q24     | 103422485 | 103538459 | 4790      | <i>NFKB1</i>     | 0.4249  | -1.1779 |
| children | 4q24     | 103552642 | 103682151 | 4126      | <i>MANBA</i>     | 0.4249  | -1.1779 |
| children | 4q24     | 103715539 | 103748340 | 7323      | <i>UBE2D3</i>    | 0.4249  | -1.1779 |
| children | 4q24     | 103790134 | 103813963 | 493856    | <i>CISD2</i>     | 0.4249  | -1.1779 |
| children | 4q24     | 103806204 | 103940896 | 150159    | <i>SLC9B1</i>    | 0.4249  | -1.1779 |
| children | 4q24     | 103946647 | 103997930 | 133308    | <i>SLC9B2</i>    | 0.4249  | -1.1779 |
| children | 4q24     | 103998781 | 104021024 | 56898     | <i>BDH2</i>      | 0.4249  | -1.1779 |
| children | 4q24-q25 | 104026962 | 104119566 | 1062      | <i>CENPE</i>     | 0.4249  | -1.1779 |
| children | 4q25     | 104510624 | 104640973 | 6870      | <i>TACR3</i>     | 0.4249  | -1.1779 |
| children | 4q24     | 105389462 | 105416058 | 80319     | <i>CXXC4</i>     | 0.4249  | -1.1779 |
| children | 4q31.1   | 148999914 | 149363672 | 4306      | <i>NR3C2</i>     | 0.2092  | -1.0773 |
| children | 4q22.3   | 95128758  | 95212443  | 56916     | <i>SMARCA1</i>   | 0.649   | -1.3635 |
| children | 4q22.3   | 95219706  | 95264027  | 27306     | <i>HPGDS</i>     | 0.649   | -1.3635 |
| children | 4q22     | 95373007  | 95378340  | 10611     | <i>PDLIM5</i>    | 0.649   | -1.3635 |
| children | 4q22-q24 | 95679127  | 96079601  | 658       | <i>BMPRI1B</i>   | 0.4122  | -1.2396 |
| children | 4q21-q23 | 96083655  | 96470361  | 8633      | <i>UNC5C</i>     | 0.4122  | -1.2396 |
| children | 4q22-q23 | 96761238  | 96762625  | 5161      | <i>PDHA2</i>     | 0.4122  | -1.2396 |
| children | 4q22.3   | 98288076  | 98411315  | 101410545 | <i>STPG2-ASI</i> | 0.2117  | -1.2396 |

|          |            |           |           |           |                  |        |         |
|----------|------------|-----------|-----------|-----------|------------------|--------|---------|
| children | 4q22.3-q23 | 98480024  | 99064391  | 285555    | <i>STPG2</i>     | 0.2117 | -1.2396 |
| children | 4q23-q25   | 99182526  | 99365012  | 5910      | <i>RAP1GDS1</i>  | 0.2117 | -1.2396 |
| children | 4q23       | 99391517  | 99579812  | 10098     | <i>TSPAN5</i>    | 0.2117 | -1.2396 |
| children | 4q23       | 99799606  | 99850243  | 1977      | <i>EIF4E</i>     | 0.2117 | -1.2396 |
| children | 4q23       | 99916787  | 99983960  | 23173     | <i>METAP1</i>    | 0.2117 | -1.2396 |
| children | 4q23       | 99992129  | 100009939 | 128       | <i>ADH5</i>      | 0.2117 | -1.2396 |
| children | 6q16.2     | 100054649 | 100063454 | 59336     | <i>PRDM13</i>    | 0.4361 | -2.2055 |
| children | 6q16       | 100367785 | 100442099 | 84539     | <i>MCHR2</i>     | 0.4361 | -2.2055 |
| children | 6q16.3     | 100836749 | 100911551 | 6492      | <i>SIM1</i>      | 0.4361 | -2.2055 |
| children | 6q16       | 100956070 | 101329248 | 10973     | <i>ASCC3</i>     | 0.4361 | -2.2055 |
| children | 6q16.3     | 101846860 | 102517958 | 2898      | <i>GRIK2</i>     | 0.4361 | -2.3031 |
| children | 6q16.3     | 105175967 | 105307794 | 57531     | <i>HACE1</i>     | 0.4361 | -1.8278 |
| children | 6q21       | 105384168 | 105388402 | 100113403 | <i>LINC00577</i> | 0.2021 | -1.8126 |
| children | 6q21       | 105404922 | 105531207 | 389421    | <i>LIN28B</i>    | 0.2021 | -1.8126 |
| children | 6q21       | 105544698 | 105584221 | 11149     | <i>BVES</i>      | 0.2021 | -1.8126 |
| children | 6q21       | 105585561 | 105617819 | 154442    | <i>BVES-AS1</i>  | 0.2021 | -1.8126 |
| children | 6q21       | 105605774 | 105624130 | 64208     | <i>POPDC3</i>    | 0.2021 | -1.8126 |
| children | 6q22       | 105725441 | 105850999 | 5550      | <i>PREP</i>      | 0.2021 | -1.7978 |
| children | 6q21       | 106534194 | 106557814 | 639       | <i>PRDM1</i>     | 0.2021 | -1.783  |
| children | 6q21       | 106632351 | 106773695 | 9474      | <i>ATG5</i>      | 0.2021 | -1.783  |
| children | 6q21       | 106959729 | 107018324 | 202       | <i>AIM1</i>      | 0.2021 | -1.783  |
| children | 6q21       | 107018902 | 107077373 | 84816     | <i>RTN4IP1</i>   | 0.2021 | -1.783  |
| children | 6q21       | 107077440 | 107116292 | 55278     | <i>QRS1</i>      | 0.2021 | -1.783  |
| children | 6q21       | 107349375 | 107372790 | 51250     | <i>C6orf203</i>  | 0.2021 | -1.783  |
| children | 6q21       | 107386384 | 107435636 | 57673     | <i>BEND3</i>     | 0.2021 | -1.783  |
| children | 6q21       | 107473760 | 107780779 | 57107     | <i>PDSS2</i>     | 0.2021 | -1.783  |
| children | 6q21       | 107811316 | 107982513 | 55084     | <i>SOBP</i>      | 0.2021 | -1.783  |
| children | 6q21       | 108023360 | 108145521 | 256380    | <i>SCML4</i>     | 0.2021 | -1.783  |
| children | 6q21       | 108188959 | 108279482 | 11231     | <i>SEC63</i>     | 0.2021 | -1.783  |
| children | 6q21       | 108362612 | 108395941 | 28962     | <i>OSTM1</i>     | 0.2021 | -1.783  |
| children | 6q21       | 108487261 | 108510013 | 7101      | <i>NR2E1</i>     | 0.2021 | -1.783  |
| children | 6q21       | 108532420 | 108582464 | 8724      | <i>SNX3</i>      | 0.2021 | -1.783  |
| children | 6q22.1     | 108616097 | 108844251 | 246269    | <i>LACE1</i>     | 0.2021 | -1.783  |



|          |          |           |           |        |                     |        |         |
|----------|----------|-----------|-----------|--------|---------------------|--------|---------|
| children | 6q21     | 108881025 | 109005971 | 2309   | <i>FOXO3</i>        | 0.2017 | -1.783  |
| children | 6q21     | 109072856 | 109091145 | 387111 | <i>LINC00222</i>    | 0.2013 | -1.783  |
| children | 6q21     | 109169618 | 109295675 | 84071  | <i>ARMC2</i>        | 0.2013 | -1.783  |
| children | 6q21     | 109307639 | 109330191 | 27244  | <i>SESN1</i>        | 0.2013 | -1.783  |
| children | 6q21     | 109416355 | 109485115 | 285753 | <i>CEP57L1</i>      | 0.2013 | -1.783  |
| children | 6q21     | 109615505 | 109629423 | 221262 | <i>CCDC162P</i>     | 0.2013 | -1.783  |
| children | 6q21     | 109687716 | 109703762 | 8763   | <i>CD164</i>        | 0.2013 | -1.783  |
| children | 6q21     | 109711417 | 109762374 | 285755 | <i>PPIL6</i>        | 0.2013 | -1.783  |
| children | 6q21     | 109761930 | 109765122 | 6610   | <i>SMPD2</i>        | 0.2013 | -1.783  |
| children | 6q21     | 109765265 | 109777190 | 64780  | <i>MICAL1</i>       | 0.2013 | -1.783  |
| children | 6q21     | 109783718 | 109804440 | 9841   | <i>ZBTB24</i>       | 0.2013 | -1.783  |
| children | 6q21     | 109814058 | 110012415 | 221264 | <i>AK9</i>          | 0.2013 | -1.783  |
| children | 6q21     | 110012423 | 110146634 | 9896   | <i>FIG4</i>         | 0.2013 | -1.783  |
| children | 6q21     | 110299458 | 110301923 | 2830   | <i>GPR6</i>         | 0.2013 | -1.783  |
| children | 6q21     | 110421021 | 110501207 | 8936   | <i>WASF1</i>        | 0.2013 | -1.783  |
| children | 6q21     | 110501623 | 110553422 | 51362  | <i>CDC40</i>        | 0.2013 | -1.783  |
| children | 6q21     | 110567148 | 110679475 | 728464 | <i>METTL24</i>      | 0.2013 | -1.8062 |
| children | 6q21     | 110713382 | 110736753 | 8528   | <i>DDO</i>          | 0.2013 | -1.8293 |
| children | 6q22.1   | 110745891 | 110797844 | 85413  | <i>SLC22A16</i>     | 0.2013 | -1.8293 |
| children | 6q21     | 110931180 | 111136519 | 23097  | <i>CDK19</i>        | 0.2013 | -1.8293 |
| children | 6q21     | 111195986 | 111216915 | 262    | <i>AMD1</i>         | 0.2013 | -1.8293 |
| children | 6q21     | 111279762 | 111289091 | 112495 | <i>GTF3C6</i>       | 0.2013 | -1.8293 |
| children | 6q21     | 111303219 | 111349466 | 84154  | <i>RPF2</i>         | 0.2013 | -1.8293 |
| children | 6q21     | 111367621 | 111368757 | 442245 | <i>GSTM2P1</i>      | 0.2013 | -1.8293 |
| children | 6q21-q22 | 111408780 | 111544606 | 117247 | <i>SLC16A10</i>     | 0.2013 | -1.8293 |
| children | 6q22     | 111580481 | 111590261 | 91749  | <i>KIAA1919</i>     | 0.2013 | -1.8293 |
| children | 6q21     | 111620233 | 111804918 | 5980   | <i>REV3L</i>        | 0.2013 | -1.8293 |
| children | 6q21     | 111804674 | 111824811 | 643749 | <i>TRAF3IP2-AS1</i> | 0.2013 | -1.8293 |
| children | 6q21     | 111876580 | 111888563 | 10758  | <i>TRAF3IP2</i>     | 0.2013 | -1.8293 |
| children | 6q21     | 111981534 | 112041265 | 2534   | <i>FYN</i>          | 0.2013 | -1.8293 |
| children | 6q21     | 112375277 | 112390887 | 8838   | <i>WISP3</i>        | 0.2013 | -1.8293 |
| children | 6q21     | 112391859 | 112408751 | 51175  | <i>TUBE1</i>        | 0.2013 | -1.8293 |
| children | 6q21     | 112408673 | 112423993 | 619208 | <i>FAM229B</i>      | 0.2013 | -1.8293 |

|          |             |           |           |           |                 |        |         |
|----------|-------------|-----------|-----------|-----------|-----------------|--------|---------|
| children | 6q21        | 112429133 | 112575917 | 3910      | <i>LAMA4</i>    | 0.2013 | -1.8293 |
| children | 6q21        | 112668531 | 112672498 | 442247    | <i>RFPL4B</i>   | 0.2013 | -1.8293 |
| children | 6q22.2      | 114178513 | 114184652 | 4082      | <i>MARCKS</i>   | 0.2013 | -2.0446 |
| children | 6q21        | 114225550 | 114242806 | 285759    | <i>FLJ34503</i> | 0.2013 | -2.1193 |
| children | 6q21        | 114257319 | 114292359 | 3066      | <i>HDAC2</i>    | 0.2013 | -2.1193 |
| children | 6q21        | 114376749 | 114384041 | 222537    | <i>HS3ST5</i>   | 0.2013 | -2.1193 |
| children | 6q21-q22.3  | 116262692 | 116381921 | 2444      | <i>FRK</i>      | 0.2013 | -1.4605 |
| children | 6q22.1      | 116359893 | 116361107 | 728402    | <i>TPIIP3</i>   | 0.2013 | -1.4605 |
| children | 6q22.1      | 116421998 | 116566853 | 221294    | <i>NT5DC1</i>   | 0.2013 | -1.4605 |
| children | 6q21-q22    | 116440084 | 116447296 | 1300      | <i>COL10A1</i>  | 0.2013 | -1.4605 |
| children | 6q22.1      | 116571130 | 116575261 | 23270     | <i>TSPYL4</i>   | 0.2013 | -1.4605 |
| children | 6q22.1      | 116596021 | 116601280 | 7259      | <i>TSPYL1</i>   | 0.2013 | -1.4605 |
| children | 6q22        | 116601282 | 116759442 | 29940     | <i>DSE</i>      | 0.2013 | -1.4605 |
| children | 6q22.1      | 116782532 | 116784934 | 441168    | <i>FAM26F</i>   | 0.2013 | -1.4605 |
| children | 6q22.1      | 116817650 | 116866773 | 100128327 | <i>TRAPPC3L</i> | 0.2013 | -1.4605 |
| children | 6q22.1      | 116832807 | 116839709 | 254228    | <i>FAM26E</i>   | 0.2013 | -1.4605 |
| children | 6q22.1      | 116850175 | 116880031 | 221301    | <i>FAM26D</i>   | 0.2013 | -1.4605 |
| children | 6q13-q22.33 | 116892529 | 116914764 | 51389     | <i>RWDD1</i>    | 0.2013 | -1.4605 |
| children | 6q22.1      | 116937641 | 116954148 | 345895    | <i>RSPH4A</i>   | 0.2013 | -1.4605 |
| children | 6q22.1      | 116956780 | 116989973 | 221302    | <i>ZUFSP</i>    | 0.2013 | -1.4605 |
| children | 6q22.1      | 117002366 | 117063030 | 3841      | <i>KPNA5</i>    | 0.2013 | -1.4605 |
| children | 6q22.1      | 117073359 | 117086886 | 221303    | <i>FAM162B</i>  | 0.2013 | -1.4605 |
| children | 6q22.1      | 117113247 | 117150220 | 222545    | <i>GPRC6A</i>   | 0.2013 | -1.4605 |
| children | 6q22.1      | 117198375 | 117253326 | 222546    | <i>RFX6</i>     | 0.2013 | -1.4605 |
| children | 6q22.1      | 117586720 | 117594728 | 245806    | <i>VGLL2</i>    | 0.2013 | -1.4605 |
| children | 6q22        | 117609529 | 117747018 | 6098      | <i>ROSI</i>     | 0.2013 | -1.4605 |
| children | 6q22.1      | 117803766 | 117891020 | 285761    | <i>DCBLD1</i>   | 0.2013 | -1.4605 |
| children | 6q21        | 117881432 | 117923705 | 57120     | <i>GOPC</i>     | 0.2013 | -1.4605 |
| children | 6q22.1      | 117996616 | 118031886 | 116150    | <i>NUS1</i>     | 0.2013 | -1.4605 |
| children | 6q22.31     | 118228688 | 118638839 | 222553    | <i>SLC35F1</i>  | 0.2013 | -1.4605 |
| children | 6q22        | 118781934 | 118973020 | 387119    | <i>CEP85L</i>   | 0.2013 | -1.4605 |
| children | 6q22.31     | 118822535 | 118824996 | 23629     | <i>BRD7P3</i>   | 0.2013 | -1.4605 |
| children | 6q22.1      | 118869441 | 118881587 | 5350      | <i>PLN</i>      | 0.2013 | -1.4605 |

|          |              |           |           |           |                     |        |         |
|----------|--------------|-----------|-----------|-----------|---------------------|--------|---------|
| children | 6q22.31      | 119103870 | 119104581 | 100287632 | <i>LOC100287632</i> | 0.2013 | -1.4605 |
| children | 6q22.31      | 119134611 | 119252903 | 254394    | <i>MCM9</i>         | 0.2013 | -1.4605 |
| children | 6q22.31      | 119215240 | 119230335 | 25842     | <i>ASF1A</i>        | 0.2013 | -1.4605 |
| children | 6q22.31      | 119280993 | 119399812 | 79632     | <i>FAM184A</i>      | 0.2013 | -1.4605 |
| children | 6q22.31      | 119390211 | 119390308 | 693128    | <i>MIR548B</i>      | 0.2013 | -1.4605 |
| children | 6q22         | 119498365 | 119670931 | 4121      | <i>MAN1A1</i>       | 0.2013 | -1.4605 |
| children | 6q22.31      | 119773711 | 119812467 | 285762    | <i>LOC285762</i>    | 0.2013 | -1.4605 |
| children | 6q22.31      | 121756722 | 121770890 | 2697      | <i>GJAI</i>         | 0.2013 | -1.4605 |
| children | 6q22.31      | 122720695 | 122741555 | 3298      | <i>HSF2</i>         | 0.2013 | -1.4605 |
| children | 6q22.31      | 122764492 | 122793026 | 57515     | <i>SERINC1</i>      | 0.2013 | -1.4605 |
| children | 6q22.31      | 122793061 | 123047518 | 5570      | <i>PKIB</i>         | 0.2013 | -1.4605 |
| children | 6q22-q23     | 123100645 | 123105218 | 2173      | <i>FABP7</i>        | 0.2013 | -1.4605 |
| children | 6q22.31      | 123110193 | 123130864 | 10924     | <i>SMPDL3A</i>      | 0.2013 | -1.4605 |
| children | 6q22.31      | 123317115 | 123394064 | 134829    | <i>CLVS2</i>        | 0.2013 | -1.4605 |
| children | 6q22.31      | 123537483 | 123958238 | 10345     | <i>TRDN</i>         | 0.2013 | -1.4605 |
| children | 6q21         | 124124990 | 125146786 | 154215    | <i>NKAIN2</i>       | 0.2013 | -1.2611 |
| children | 6pter-q22.33 | 84569369  | 84670146  | 51167     | <i>CYB5R4</i>       | 0.2021 | -1.1817 |
| children | 6q14.2       | 84743419  | 84800605  | 112609    | <i>MRAP2</i>        | 0.2021 | -1.1817 |
| children | 6q14-q15     | 85442215  | 85473954  | 9096      | <i>TBX18</i>        | 0.2021 | -1.1817 |
| children | 6q14-q15     | 87647023  | 87726397  | 3354      | <i>HTR1E</i>        | 0.2021 | -1.2664 |
| children | 6q12-q21     | 87795215  | 87804865  | 1081      | <i>CGA</i>          | 0.2021 | -1.2664 |
| children | 6q14.3       | 87865268  | 87973406  | 23036     | <i>ZNF292</i>       | 0.2021 | -1.2664 |
| children | 6q15         | 87992696  | 88038996  | 375519    | <i>GJB7</i>         | 0.2021 | -1.2664 |
| children | 6q15         | 88032305  | 88052046  | 57150     | <i>SMIM8</i>        | 0.2021 | -1.2664 |
| children | 6q15         | 88054570  | 88075181  | 206412    | <i>C6orf163</i>     | 0.2021 | -1.2664 |
| children | 6q15         | 88117689  | 88174191  | 154313    | <i>C6orf165</i>     | 0.2021 | -1.2664 |
| children | 6q15         | 88182642  | 88222057  | 10559     | <i>SLC35A1</i>      | 0.2021 | -1.2664 |
| children | 6q16.1       | 88224095  | 88299735  | 57038     | <i>RARS2</i>        | 0.2021 | -1.2664 |
| children | 6q14.3-q16.1 | 88299784  | 88377172  | 23595     | <i>ORC3</i>         | 0.2021 | -1.2664 |
| children | 6q15         | 88384577  | 88411985  | 55122     | <i>AKIRIN2</i>      | 0.2021 | -1.2664 |
| children | 6q15         | 88757506  | 88776550  | 81833     | <i>SPACA1</i>       | 0.2021 | -1.2664 |
| children | 6q14-q15     | 88849584  | 88855056  | 1268      | <i>CNRI</i>         | 0.2021 | -1.2396 |
| children | 6q16         | 89319615  | 89673348  | 8732      | <i>RNGTT</i>        | 0.2021 | -1.2396 |

|          |              |          |           |           |                 |        |         |
|----------|--------------|----------|-----------|-----------|-----------------|--------|---------|
| children | 6q15         | 89790428 | 89794879  | 10957     | <i>PNRC1</i>    | 0.2021 | -1.2396 |
| children | 6q15         | 89805677 | 89827800  | 135295    | <i>SRSF12</i>   | 0.2021 | -1.2396 |
| children | 6q15         | 89855768 | 89875288  | 135293    | <i>PM20D2</i>   | 0.2021 | -1.2396 |
| children | 6q15         | 89887222 | 89927496  | 2569      | <i>GABRR1</i>   | 0.2021 | -1.2404 |
| children | 6q15         | 89966839 | 90025018  | 2570      | <i>GABRR2</i>   | 0.2021 | -1.2412 |
| children | 6q15         | 90036343 | 90062619  | 51465     | <i>UBE2J1</i>   | 0.2021 | -1.2412 |
| children | 6q15         | 90074334 | 90121995  | 58528     | <i>RRAGD</i>    | 0.2021 | -1.2412 |
| children | 6q15         | 90142896 | 90343553  | 22881     | <i>ANKRD6</i>   | 0.2021 | -1.2412 |
| children | 6q15         | 90341942 | 90348216  | 57226     | <i>LYRM2</i>    | 0.2021 | -1.2412 |
| children | 6q15         | 90352493 | 90529513  | 23195     | <i>MDN1</i>     | 0.2021 | -1.2412 |
| children | 6q15         | 90539618 | 90584155  | 9994      | <i>CASP8AP2</i> | 0.2021 | -1.2412 |
| children | 6q15         | 90604187 | 90605819  | 84694     | <i>GJA10</i>    | 0.2021 | -1.3196 |
| children | 6q15         | 90636246 | 91006627  | 60468     | <i>BACH2</i>    | 0.2021 | -1.3196 |
| children | 6q15         | 91223291 | 91297020  | 6885      | <i>MAP3K7</i>   | 0.4361 | -1.3196 |
| children | 6q16.1       | 93949739 | 94129300  | 2045      | <i>EPHA7</i>    | 0.4361 | -1.3196 |
| children | 6q16.1       | 94416800 | 94486199  | 643432    | <i>TSG1</i>     | 0.4361 | -1.3196 |
| children | 6q16.1       | 96025372 | 96057328  | 79694     | <i>MANEA</i>    | 0.8796 | -1.8492 |
| children | 6q16         | 96463844 | 96663488  | 10690     | <i>FUT9</i>     | 0.4361 | -1.7834 |
| children | 6q16.1       | 96969701 | 97003151  | 23376     | <i>UFL1</i>     | 0.4361 | -2.1374 |
| children | 6q16.1-q16.3 | 97010423 | 97064512  | 9457      | <i>FHL5</i>     | 0.4361 | -2.1374 |
| children | 6q16.1-q16.3 | 97241997 | 97285353  | 81491     | <i>GPR63</i>    | 0.4361 | -2.1374 |
| children | 6q16.1       | 97337186 | 97345767  | 29078     | <i>NDUFAF4</i>  | 0.4361 | -2.1374 |
| children | 6q16.1       | 97372495 | 97588630  | 114792    | <i>KLHL32</i>   | 0.4361 | -2.1374 |
| children | 6q16.1       | 97590036 | 97731052  | 253714    | <i>MMS22L</i>   | 0.4361 | -2.1374 |
| children | 6q16         | 99282579 | 99286666  | 5454      | <i>POU3F2</i>   | 0.4361 | -2.1374 |
| children | 6q16.1-q16.3 | 99321600 | 99395882  | 26235     | <i>FBXL4</i>    | 0.4361 | -2.1374 |
| children | 6q16.2       | 99720792 | 99797531  | 84553     | <i>FAXC</i>     | 0.4361 | -2.1374 |
| children | 6q16.2       | 99817347 | 99842082  | 51805     | <i>COQ3</i>     | 0.4361 | -2.1374 |
| children | 6q16.3       | 99847840 | 99873207  | 25957     | <i>PNISR</i>    | 0.4361 | -1.8389 |
| children | 6q16.2       | 99880183 | 99963252  | 85015     | <i>USP45</i>    | 0.4361 | -1.8389 |
| children | 6q16.2       | 99968869 | 99981059  | 100130890 | <i>TSTD3</i>    | 0.4361 | -1.8389 |
| children | 6q21         | 99990262 | 100016690 | 892       | <i>CCNC</i>     | 0.4361 | -1.8389 |
| children | 7p21.3       | 10971579 | 10979813  | 4697      | <i>NDUFA4</i>   | 0      | -2.1625 |

|          |              |          |          |           |                  |   |         |
|----------|--------------|----------|----------|-----------|------------------|---|---------|
| children | 7p21.3       | 11013498 | 11147376 | 9678      | <i>PHF14</i>     | 0 | -2.1625 |
| children | 7p21.3       | 11410061 | 11871824 | 221981    | <i>THSD7A</i>    | 0 | -2.1625 |
| children | 7p21.3       | 12250847 | 12276890 | 54664     | <i>TMEM106B</i>  | 0 | -2.1625 |
| children | 7p21.3       | 12370508 | 12443852 | 221806    | <i>VWDE</i>      | 0 | -2.1625 |
| children | 7p21.3       | 12610202 | 12693228 | 85477     | <i>SCIN</i>      | 0 | -2.1625 |
| children | 7p21.3       | 12726451 | 12730558 | 10124     | <i>ARL4A</i>     | 0 | -2.1625 |
| children | 7p21.3       | 13930855 | 14026139 | 2115      | <i>ETV1</i>      | 0 | -2.1006 |
| children | 7p21.2       | 14184673 | 14881075 | 1607      | <i>DGKB</i>      | 0 | -2.1049 |
| children | 7p21.2       | 15239942 | 15601640 | 392636    | <i>AGMO</i>      | 0 | -2.1049 |
| children | 7p22.1-p21.3 | 15650836 | 15726308 | 4223      | <i>MEOX2</i>     | 0 | -2.1049 |
| children | 7p22.3       | 1570367  | 1582679  | 7975      | <i>MAFK</i>      | 0 | -1.1621 |
| children | 7p22.3       | 1581870  | 1596066  | 202915    | <i>TMEM184A</i>  | 0 | -1.1621 |
| children | 7p22.3       | 1606969  | 1609629  | 84262     | <i>PSMG3</i>     | 0 | -1.1621 |
| children | 7p22.3       | 1609708  | 1629261  | 114796    | <i>PSMG3-AS1</i> | 0 | -1.1621 |
| children | 7p21.2       | 16127151 | 16460947 | 729920    | <i>ISPD</i>      | 0 | -2.1228 |
| children | 7p21.1       | 16501105 | 16505474 | 25928     | <i>SOSTDC1</i>   | 0 | -2.1407 |
| children | 7p22.3       | 1654105  | 1656328  | 260341    | <i>TFAMP1</i>    | 0 | -1.1621 |
| children | 7p21.1       | 16566504 | 16621114 | 100506049 | <i>LRRC72</i>    | 0 | -2.1407 |
| children | 7p21         | 16639400 | 16685442 | 57037     | <i>ANKMY2</i>    | 0 | -2.1407 |
| children | 7p21.1       | 16685758 | 16746148 | 28969     | <i>BZW2</i>      | 0 | -2.1407 |
| children | 7p21.1       | 16793350 | 16824161 | 27075     | <i>TSPAN13</i>   | 0 | -2.1407 |
| children | 7p21.3       | 16832263 | 16844738 | 10551     | <i>AGR2</i>      | 0 | -2.1407 |
| children | 7p21.1       | 16899029 | 16921613 | 155465    | <i>AGR3</i>      | 0 | -2.1407 |
| children | 7p15         | 17338275 | 17385775 | 196       | <i>AHR</i>       | 0 | -2.1407 |
| children | 7p22.3       | 1748797  | 1787590  | 392617    | <i>ELFNI</i>     | 0 | -1.1621 |
| children | 7p21.1       | 17830384 | 17980131 | 23161     | <i>SNX13</i>     | 0 | -2.1407 |
| children | 7p21.1       | 18066399 | 18067486 | 221823    | <i>PRPS1L1</i>   | 0 | -2.1407 |
| children | 7p21.1       | 18126571 | 18708466 | 9734      | <i>HDAC9</i>     | 0 | -2.1407 |
| children | 7p22         | 1855427  | 2272583  | 8379      | <i>MAD1L1</i>    | 0 | -1.1621 |
| children | 7p21.2       | 19155090 | 19157295 | 7291      | <i>TWIST1</i>    | 0 | -2.1407 |
| children | 7p21.1       | 19184404 | 19185044 | 222894    | <i>FERD3L</i>    | 0 | -2.1407 |
| children | 7p21.1       | 19735084 | 19748660 | 221830    | <i>TWISTNB</i>   | 0 | -2.1407 |
| children | 7p21.1       | 19758937 | 19812404 | 256130    | <i>TMEM196</i>   | 0 | -2.1407 |

|          |        |          |          |           |                  |   |         |
|----------|--------|----------|----------|-----------|------------------|---|---------|
| children | 7p21.1 | 20174278 | 20257013 | 346389    | <i>MACC1</i>     | 0 | -2.1407 |
| children | 7p21.1 | 20370724 | 20455382 | 3696      | <i>ITGB8</i>     | 0 | -2.1407 |
| children | 7p21.1 | 20655244 | 20796637 | 340273    | <i>ABCB5</i>     | 0 | -1.9968 |
| children | 7p21.2 | 20821893 | 20826508 | 221833    | <i>SP8</i>       | 0 | -1.8529 |
| children | 7p21.1 | 20866916 | 20867439 | 222901    | <i>RPL23P8</i>   | 0 | -1.8529 |
| children | 7p15.3 | 21467688 | 21554151 | 6671      | <i>SP4</i>       | 0 | -1.8529 |
| children | 7p21   | 21582832 | 21941186 | 8701      | <i>DNAH11</i>    | 0 | -1.8529 |
| children | 7p15.3 | 21940516 | 21985542 | 55536     | <i>CDC47L</i>    | 0 | -1.8529 |
| children | 7p15.3 | 22157907 | 22396533 | 9771      | <i>RAPGEF5</i>   | 0 | -1.8529 |
| children | 7p15.3 | 22459062 | 22539901 | 256227    | <i>STEAP1B</i>   | 0 | -1.7384 |
| children | 7p22   | 2273925  | 2281833  | 29960     | <i>FTSJ2</i>     | 0 | -1.1621 |
| children | 7p21   | 22766765 | 22771621 | 3569      | <i>IL6</i>       | 0 | -1.7384 |
| children | 7p22   | 2281856  | 2290780  | 4521      | <i>NUDT1</i>     | 0 | -1.1621 |
| children | 7p15.3 | 22852250 | 22862471 | 54543     | <i>TOMM7</i>     | 0 | -1.7384 |
| children | 7p15.3 | 22896231 | 22896305 | 692210    | <i>SNORD93</i>   | 0 | -1.7384 |
| children | 7p22.3 | 2291404  | 2354110  | 29886     | <i>SNX8</i>      | 0 | -1.1621 |
| children | 7p15.3 | 22980877 | 23053770 | 84668     | <i>FAM126A</i>   | 0 | -1.7384 |
| children | 7p15.3 | 23140846 | 23145322 | 100775104 | <i>KLHL7-AS1</i> | 0 | -1.7384 |
| children | 7p15.3 | 23145352 | 23165669 | 55975     | <i>KLHL7</i>     | 0 | -1.7384 |
| children | 7p15   | 23221445 | 23240630 | 11097     | <i>NUPL2</i>     | 0 | -1.7384 |
| children | 7p15   | 23286315 | 23314729 | 10457     | <i>GPNMB</i>     | 0 | -1.7384 |
| children | 7p15.3 | 23338939 | 23349180 | 115416    | <i>MALSU1</i>    | 0 | -1.7384 |
| children | 7p11   | 23349827 | 23509995 | 10643     | <i>IGF2BP3</i>   | 0 | -1.7384 |
| children | 7p15.3 | 23530006 | 23531031 | 256355    | <i>RPS2P32</i>   | 0 | -1.7384 |
| children | 7p15.3 | 23544400 | 23571660 | 29896     | <i>TRA2A</i>     | 0 | -1.7384 |
| children | 7p15.3 | 23636997 | 23684327 | 90693     | <i>CCDC126</i>   | 0 | -1.7384 |
| children | 7p15.3 | 23719732 | 23742269 | 340277    | <i>FAM221A</i>   | 0 | -1.7384 |
| children | 7p15.3 | 23749785 | 23872130 | 56164     | <i>STK31</i>     | 0 | -1.7384 |
| children | 7p22.3 | 2394473  | 2420377  | 8662      | <i>EIF3B</i>     | 0 | -1.1621 |
| children | 7p15.1 | 24323806 | 24331484 | 4852      | <i>NPY</i>       | 0 | -1.2061 |
| children | 7p22   | 2443194  | 2474216  | 55501     | <i>CHST12</i>    | 0 | -1.1621 |
| children | 7p15   | 24612964 | 24733322 | 51678     | <i>MPP6</i>      | 0 | -1.2061 |
| children | 7p15   | 24737973 | 24797083 | 1687      | <i>DFNA5</i>     | 0 | -1.2061 |

|          |        |          |          |           |                     |   |         |
|----------|--------|----------|----------|-----------|---------------------|---|---------|
| children | 7p15   | 24836155 | 24932240 | 26031     | <i>OSBPL3</i>       | 0 | -1.2061 |
| children | 7p15.3 | 25158269 | 25164980 | 54205     | <i>CYCS</i>         | 0 | -1.2061 |
| children | 7p15.3 | 25174315 | 25219817 | 136895    | <i>C7orf31</i>      | 0 | -1.2061 |
| children | 7p15.3 | 25264190 | 25268105 | 64111     | <i>NPVF</i>         | 0 | -1.2061 |
| children | 7p22.2 | 2552162  | 2568063  | 3955      | <i>LFNG</i>         | 0 | -1.1621 |
| children | 7p22.3 | 2577443  | 2595392  | 221927    | <i>BRATI</i>        | 0 | -1.1621 |
| children | 7p22.3 | 2598605  | 2654368  | 23288     | <i>IQCE</i>         | 0 | -1.1621 |
| children | 7p15.2 | 25989538 | 25989606 | 406940    | <i>MIR148A</i>      | 0 | -1.2061 |
| children | 7p15.2 | 26191846 | 26226756 | 9603      | <i>NFE2L3</i>       | 0 | -1.1706 |
| children | 7p15   | 26229555 | 26240413 | 3181      | <i>HNRNPA2B1</i>    | 0 | -1.1706 |
| children | 7p15.2 | 26240830 | 26253227 | 11335     | <i>CBX3</i>         | 0 | -1.1706 |
| children | 7p15.2 | 26331514 | 26413949 | 29887     | <i>SNX10</i>        | 0 | -1.1706 |
| children | 7p15.2 | 26443107 | 26535986 | 441204    | <i>LOC441204</i>    | 0 | -1.1706 |
| children | 7p15.2 | 26572739 | 26578444 | 9808      | <i>KLAA0087</i>     | 0 | -1.1706 |
| children | 7p15.2 | 26677489 | 26686889 | 285941    | <i>C7orf71</i>      | 0 | -1.1706 |
| children | 7p15.2 | 26706680 | 26904362 | 8935      | <i>SKAP2</i>        | 0 | -1.1706 |
| children | 7p22   | 2671602  | 2704436  | 80727     | <i>TTYH3</i>        | 0 | -1.1621 |
| children | 7p15.3 | 27132613 | 27135625 | 3198      | <i>HOXA1</i>        | 0 | -1.1706 |
| children | 7p15.2 | 27135712 | 27139877 | 100506311 | <i>HOTAIRM1</i>     | 0 | -1.1706 |
| children | 7p15.2 | 27139972 | 27142394 | 3199      | <i>HOXA2</i>        | 0 | -1.1706 |
| children | 7p15.2 | 27145808 | 27159214 | 3200      | <i>HOXA3</i>        | 0 | -1.1706 |
| children | 7p15.2 | 27168125 | 27170399 | 3201      | <i>HOXA4</i>        | 0 | -1.1706 |
| children | 7p15.2 | 27179982 | 27195547 | 100133311 | <i>HOXA-AS3</i>     | 0 | -1.1706 |
| children | 7p15.2 | 27180670 | 27183287 | 3202      | <i>HOXA5</i>        | 0 | -1.1706 |
| children | 7p15.2 | 27185201 | 27187393 | 3203      | <i>HOXA6</i>        | 0 | -1.1706 |
| children | 7p22.3 | 2719155  | 2755070  | 155185    | <i>AMZ1</i>         | 0 | -1.1621 |
| children | 7p15.2 | 27193337 | 27196296 | 3204      | <i>HOXA7</i>        | 0 | -1.1706 |
| children | 7p15.2 | 27202056 | 27205149 | 3205      | <i>HOXA9</i>        | 0 | -1.1706 |
| children | 7p15.2 | 27202056 | 27219880 | 100534589 | <i>HOXA10-HOXA9</i> | 0 | -1.1706 |
| children | 7p15.2 | 27209098 | 27209182 | 442920    | <i>MIR196B</i>      | 0 | -1.1706 |
| children | 7p15.2 | 27210209 | 27213955 | 3206      | <i>HOXA10</i>       | 0 | -1.1706 |
| children | 7p15.2 | 27220775 | 27224835 | 3207      | <i>HOXA11</i>       | 0 | -1.1706 |
| children | 7p15.2 | 27225026 | 27228912 | 221883    | <i>HOXA11-AS</i>    | 0 | -1.1706 |

|          |              |          |          |           |                      |   |         |
|----------|--------------|----------|----------|-----------|----------------------|---|---------|
| children | 7p15.2       | 27236498 | 27239725 | 3209      | <i>HOXA13</i>        | 0 | -1.1706 |
| children | 7p15.2       | 27240039 | 27246878 | 100316868 | <i>HOTTIP</i>        | 0 | -1.1706 |
| children | 7p15.2       | 27282163 | 27287438 | 2128      | <i>EVXI</i>          | 0 | -1.1706 |
| children | 7p15.2       | 27565058 | 27702620 | 11112     | <i>HIBADH</i>        | 0 | -1.1706 |
| children | 7p22.2       | 2767740  | 2883959  | 2768      | <i>GNA12</i>         | 0 | -1.1621 |
| children | 7p15         | 27778991 | 27869386 | 8887      | <i>TAX1BP1</i>       | 0 | -1.1706 |
| children | 7p15.2-p15.1 | 27870192 | 28220437 | 221895    | <i>JAZF1</i>         | 0 | -1.1706 |
| children | 7p15.1       | 28220075 | 28280996 | 100128081 | <i>JAZF1-AS1</i>     | 0 | -1.1706 |
| children | 7p15.1       | 28338939 | 28865511 | 9586      | <i>CREB5</i>         | 0 | -1.1706 |
| children | 7p14.3       | 28992973 | 28998029 | 9865      | <i>TRIL</i>          | 0 | -1.1706 |
| children | 7p15.1       | 29035246 | 29186153 | 54504     | <i>CPVL</i>          | 0 | -1.1706 |
| children | 7p15.3       | 29234120 | 29553951 | 1124      | <i>CHN2</i>          | 0 | -1.1706 |
| children | 7p22         | 2945709  | 3083579  | 84433     | <i>CARD11</i>        | 0 | -1.1621 |
| children | 7p14.3       | 29603426 | 29606911 | 222171    | <i>PRR15</i>         | 0 | -1.1706 |
| children | 7p14.3       | 29685537 | 29724754 | 646762    | <i>LOC646762</i>     | 0 | -1.1706 |
| children | 7p15.1       | 29724769 | 29727859 | 442524    | <i>DPY19L2P3</i>     | 0 | -1.1706 |
| children | 7p14.3       | 29846169 | 29956682 | 644150    | <i>WIPF3</i>         | 0 | -1.1735 |
| children | 7p14.3       | 29959718 | 30029425 | 9805      | <i>SCRNI</i>         | 0 | -1.1763 |
| children | 7p14.3       | 30050198 | 30066417 | 55033     | <i>FKBP14</i>        | 0 | -1.1763 |
| children | 7p14.3       | 30067976 | 30124278 | 84725     | <i>PLEKHA8</i>       | 0 | -1.1763 |
| children | 7p14.3       | 30323922 | 30407308 | 223082    | <i>ZNRF2</i>         | 0 | -1.1763 |
| children | 7p14.3       | 30329409 | 30329506 | 693133    | <i>MIR550A1</i>      | 0 | -1.1763 |
| children | 7p14.3       | 30409665 | 30412410 | 222161    | <i>DKFZP586I1420</i> | 0 | -1.1763 |
| children | 7p14.3       | 30464142 | 30518393 | 10392     | <i>NOD1</i>          | 0 | -1.1763 |
| children | 7p15-p14     | 30536236 | 30544457 | 79017     | <i>GGCT</i>          | 0 | -1.1763 |
| children | 7p15.1       | 30587972 | 30617395 | 401320    | <i>LOC401320</i>     | 0 | -1.1763 |
| children | 7p15         | 30634508 | 30673648 | 2617      | <i>GARS</i>          | 0 | -1.1763 |
| children | 7p14.3       | 30691558 | 30722141 | 1395      | <i>CRHR2</i>         | 0 | -1.1763 |
| children | 7p14.3       | 30791750 | 30797218 | 11185     | <i>INMT</i>          | 0 | -1.1763 |
| children | 7p14         | 30951414 | 30965131 | 358       | <i>AQP1</i>          | 0 | -1.1763 |
| children | 7p14         | 31003635 | 31019146 | 2692      | <i>GHRHR</i>         | 0 | -1.1763 |
| children | 7p14         | 31092075 | 31151093 | 117       | <i>ADCYAP1R1</i>     | 0 | -1.1763 |
| children | 7p14.3       | 31377074 | 31380538 | 63974     | <i>NEUROD6</i>       | 0 | -1.1754 |



|          |              |          |          |           |                     |   |         |
|----------|--------------|----------|----------|-----------|---------------------|---|---------|
| children | 7p14.3       | 31553684 | 31693303 | 223075    | <i>CCDC129</i>      | 0 | -1.1844 |
| children | 7p15         | 31726630 | 31748069 | 10842     | <i>PPP1R17</i>      | 0 | -1.1933 |
| children | 7p14.3       | 31790792 | 32110474 | 5137      | <i>PDE1C</i>        | 0 | -1.1933 |
| children | 7p14.3       | 32496509 | 32498106 | 100130673 | <i>LOC100130673</i> | 0 | -1.1587 |
| children | 7p14.3       | 32524944 | 32530023 | 23658     | <i>LSM5</i>         | 0 | -1.1587 |
| children | 7p14.3       | 32535037 | 32628353 | 23080     | <i>AVL9</i>         | 0 | -1.1587 |
| children | 7p14         | 33169151 | 33645680 | 27241     | <i>BBS9</i>         | 0 | -1.1525 |
| children | 7p22.2       | 3341079  | 4308631  | 221935    | <i>SDK1</i>         | 0 | -1.4151 |
| children | 7p14.3       | 33944522 | 34195484 | 168667    | <i>BMPER</i>        | 0 | -1.1299 |
| children | 7p14.3       | 34386123 | 34797884 | 404744    | <i>NPSR1-AS1</i>    | 0 | -1.1299 |
| children | 7p14.3       | 34697896 | 34889590 | 387129    | <i>NPSR1</i>        | 0 | -1.1299 |
| children | 7p14.3-p14.2 | 34968492 | 35077653 | 23333     | <i>DPY19L1</i>      | 0 | -1.1299 |
| children | 7p14.2       | 35120898 | 35225774 | 554236    | <i>DPY19L2P1</i>    | 0 | -1.1956 |
| children | 7p14.3       | 35242041 | 35293711 | 57057     | <i>TBX20</i>        | 0 | -1.1956 |
| children | 7p14.2       | 35353465 | 35416086 | 401324    | <i>LOC401324</i>    | 0 | -1.1956 |
| children | 7p14.2       | 35672269 | 35734772 | 64224     | <i>HERPUD2</i>      | 0 | -1.1956 |
| children | 7p14.2       | 35840595 | 35946715 | 989       | <i>7-Sep</i>        | 0 | -1.1956 |
| children | 7p14.2       | 36192835 | 36341152 | 80820     | <i>EEPD1</i>        | 0 | -1.4341 |
| children | 7p14.2       | 36363758 | 36406782 | 23366     | <i>KIAA0895</i>     | 0 | -1.6101 |
| children | 7p15-p14     | 36429411 | 36493401 | 54443     | <i>ANLN</i>         | 0 | -1.6101 |
| children | 7p14.2       | 36552548 | 36764154 | 313       | <i>AOAH</i>         | 0 | -1.6101 |
| children | 7p14.1       | 36892510 | 37024717 | 9844      | <i>ELMO1</i>        | 0 | -1.6101 |
| children | 7p14.2       | 36958961 | 36959037 | 100302113 | <i>MIR1200</i>      | 0 | -1.6101 |
| children | 7p14.1       | 37779995 | 37780913 | 353345    | <i>GPR141</i>       | 0 | -1.6101 |
| children | 7p14.1       | 37888198 | 37940002 | 51314     | <i>NME8</i>         | 0 | -1.6101 |
| children | 7p14.1       | 37945534 | 37956525 | 6424      | <i>SFRP4</i>        | 0 | -1.6101 |
| children | 7p14.1       | 37960162 | 37991542 | 54749     | <i>EPDR1</i>        | 0 | -1.6101 |
| children | 7p14-p13     | 38217807 | 38270272 | 83930     | <i>STARD3NL</i>     | 0 | -1.6101 |
| children | 7p14-p13     | 38423296 | 38671167 | 273       | <i>AMPH</i>         | 0 | -1.1873 |
| children | 7p14.1       | 38724945 | 38726689 | 340286    | <i>FAM183B</i>      | 0 | -1.1873 |
| children | 7p14-p13     | 38763542 | 38948800 | 27072     | <i>VPS41</i>        | 0 | -1.1873 |
| children | 7p14.1       | 39017608 | 39504390 | 11281     | <i>POU6F2</i>       | 0 | -1.1873 |
| children | 7p14.1       | 39444197 | 39445945 | 100861520 | <i>POU6F2-AS1</i>   | 0 | -1.1873 |

|          |              |          |          |           |                     |   |         |
|----------|--------------|----------|----------|-----------|---------------------|---|---------|
| children | 7p14.1       | 39605974 | 39612480 | 57002     | <i>YAE1D1</i>       | 0 | -1.1873 |
| children | 7p15-p13     | 39663151 | 39747723 | 5898      | <i>RALA</i>         | 0 | -1.1873 |
| children | 7p14.1       | 39773166 | 39834222 | 349114    | <i>LINC00265</i>    | 0 | -1.1873 |
| children | 7p13         | 39989958 | 40136733 | 8621      | <i>CDK13</i>        | 0 | -1.1743 |
| children | 7p15-p13     | 41728600 | 41742706 | 3624      | <i>INHBA</i>        | 0 | -1.1748 |
| children | 7p14.1       | 41733513 | 41818976 | 285954    | <i>INHBA-AS1</i>    | 0 | -1.1748 |
| children | 7p13         | 42000547 | 42276618 | 2737      | <i>GLI3</i>         | 0 | -1.1748 |
| children | 7p14.1       | 42948871 | 42951689 | 79020     | <i>C7orf25</i>      | 0 | -1.1825 |
| children | 7p13         | 42956461 | 42971805 | 5683      | <i>PSMA2</i>        | 0 | -1.1825 |
| children | 7p14         | 42971938 | 42977453 | 64983     | <i>MRPL32</i>       | 0 | -1.1825 |
| children | 7p13         | 43152197 | 43602938 | 23072     | <i>HECW1</i>        | 0 | -1.5045 |
| children | 7p13         | 43622691 | 43666978 | 9263      | <i>STK17A</i>       | 0 | -1.5045 |
| children | 7p13         | 43670750 | 43769140 | 55744     | <i>COA1</i>         | 0 | -1.5045 |
| children | 7p13         | 43798271 | 43846941 | 644       | <i>BLVRA</i>        | 0 | -1.5045 |
| children | 7p14         | 43906156 | 43909145 | 64951     | <i>MRPS24</i>       | 0 | -1.5045 |
| children | 7p13         | 43906156 | 43946231 | 100534592 | <i>URGCP-MRPS24</i> | 0 | -1.5045 |
| children | 7p13         | 43915492 | 43946668 | 55665     | <i>URGCP</i>        | 0 | -1.5045 |
| children | 7p13         | 43966034 | 43995735 | 51619     | <i>UBE2D4</i>       | 0 | -1.5045 |
| children | 7p13         | 43980493 | 44058793 | 84820     | <i>POLR2J4</i>      | 0 | -1.5045 |
| children | 7p13         | 44084238 | 44101315 | 28988     | <i>DBNL</i>         | 0 | -1.1245 |
| children | 7p13-p12     | 44102325 | 44105186 | 5224      | <i>PGAM2</i>        | 0 | -1.1245 |
| children | 7p13         | 44111660 | 44122139 | 27434     | <i>POLM</i>         | 0 | -1.421  |
| children | 7p13         | 44143959 | 44154164 | 165       | <i>AEBP1</i>        | 0 | -1.421  |
| children | 7p13         | 44154278 | 44163107 | 5425      | <i>POLD2</i>        | 0 | -1.421  |
| children | 7p21-p11.2   | 44178462 | 44180916 | 58498     | <i>MYL7</i>         | 0 | -1.421  |
| children | 7p15.3-p15.1 | 44183869 | 44198887 | 2645      | <i>GCK</i>          | 0 | -1.421  |
| children | 7p15.1       | 44240577 | 44253893 | 10652     | <i>YKT6</i>         | 0 | -1.421  |
| children | 7p14.3-p14.1 | 44256748 | 44365230 | 816       | <i>CAMK2B</i>       | 0 | -1.4186 |
| children | 7p13-p12     | 44421964 | 44530385 | 23386     | <i>NUDCD3</i>       | 0 | -1.6166 |
| children | 7p13         | 44552134 | 44580914 | 29881     | <i>NPC1L1</i>       | 0 | -1.6166 |
| children | 7p13         | 44605015 | 44614137 | 54606     | <i>DDX56</i>        | 0 | -1.6166 |
| children | 7p13         | 44617493 | 44621894 | 222068    | <i>TMED4</i>        | 0 | -1.6166 |
| children | 7p14-p13     | 44646120 | 44716195 | 4967      | <i>OGDH</i>         | 0 | -1.6166 |

|          |          |          |          |        |                  |   |         |
|----------|----------|----------|----------|--------|------------------|---|---------|
| children | 7p13     | 44788529 | 44809479 | 83637  | <i>ZMIZ2</i>     | 0 | -1.6166 |
| children | 7p13     | 44836234 | 44842722 | 5478   | <i>PPIA</i>      | 0 | -1.6166 |
| children | 7p13     | 44866487 | 44887725 | 94239  | <i>H2AFV</i>     | 0 | -1.6166 |
| children | 7p13     | 44915891 | 44924984 | 5814   | <i>PURB</i>      | 0 | -1.6166 |
| children | 7p13     | 45002259 | 45018704 | 64005  | <i>MYO1G</i>     | 0 | -1.4162 |
| children | 7p13     | 45022626 | 45026259 | 285958 | <i>SNHG15</i>    | 0 | -1.4162 |
| children | 7p13     | 45024976 | 45025109 | 677798 | <i>SNORA9</i>    | 0 | -1.4162 |
| children | 7p13     | 45039344 | 45116069 | 83605  | <i>CCM2</i>      | 0 | -1.4162 |
| children | 7p13     | 45120035 | 45128493 | 23148  | <i>NACAD</i>     | 0 | -1.4162 |
| children | 7p13     | 45139698 | 45151346 | 9238   | <i>TBRG4</i>     | 0 | -1.4162 |
| children | 7p13     | 45144504 | 45144641 | 677796 | <i>SNORA5C</i>   | 0 | -1.4162 |
| children | 7p13     | 45145566 | 45145698 | 677795 | <i>SNORA5B</i>   | 0 | -1.4162 |
| children | 7p13-p12 | 45197366 | 45223850 | 10268  | <i>RAMP3</i>     | 0 | -1.4162 |
| children | 7p12.3   | 45614124 | 45762714 | 107    | <i>ADCY1</i>     | 0 | -1.4162 |
| children | 7p12.3   | 45763385 | 45808617 | 641977 | <i>SEPT7P2</i>   | 0 | -1.4162 |
| children | 7p12.3   | 45927958 | 45933267 | 3484   | <i>IGFBP1</i>    | 0 | -1.4215 |
| children | 7p12.3   | 45951843 | 45960871 | 3486   | <i>IGFBP3</i>    | 0 | -1.4215 |
| children | 7p22.1   | 4721929  | 4811074  | 221937 | <i>FOKK1</i>     | 0 | -1.628  |
| children | 7p12.3   | 47314751 | 47621742 | 64759  | <i>TNS3</i>      | 0 | -1.4215 |
| children | 7p12.3   | 47694841 | 47701246 | 401335 | <i>C7orf65</i>   | 0 | -1.4215 |
| children | 7p12.3   | 47801073 | 47806370 | 84847  | <i>LINC00525</i> | 0 | -1.7441 |
| children | 7p12.3   | 47814249 | 47988071 | 168507 | <i>PKD1L1</i>    | 0 | -1.7441 |
| children | 7p12.3   | 47834888 | 47859444 | 80099  | <i>C7orf69</i>   | 0 | -1.7441 |
| children | 7p13-p12 | 48002884 | 48019222 | 3364   | <i>HUS1</i>      | 0 | -1.7441 |
| children | 7p12.3   | 48026745 | 48068716 | 256979 | <i>SUN3</i>      | 0 | -1.7441 |
| children | 7p12.3   | 48075107 | 48100894 | 136288 | <i>C7orf57</i>   | 0 | -1.7441 |
| children | 7p12.3   | 48128808 | 48148330 | 7378   | <i>UPPI</i>      | 0 | -1.7441 |
| children | 7p22.2   | 4815261  | 4834026  | 9907   | <i>AP5Z1</i>     | 0 | -1.628  |
| children | 7p12.3   | 48211056 | 48687091 | 154664 | <i>ABCA13</i>    | 0 | -1.7441 |
| children | 7p22.1   | 4838739  | 4923335  | 55698  | <i>RADIL</i>     | 0 | -1.628  |
| children | 7p12.3   | 48964156 | 48967049 | 168448 | <i>CDC14C</i>    | 0 | -1.7441 |
| children | 7p22.1   | 4897368  | 4901625  | 56903  | <i>PAPOLB</i>    | 0 | -1.628  |
| children | 7p22.1   | 4931875  | 4998844  | 221938 | <i>MMD2</i>      | 0 | -1.628  |

|          |               |          |          |           |                  |   |         |
|----------|---------------|----------|----------|-----------|------------------|---|---------|
| children | 7p12.2        | 49813256 | 49952138 | 375567    | <i>VWC2</i>      | 0 | -1.7441 |
| children | 7p14.3        | 49977023 | 50132860 | 11055     | <i>ZPBP</i>      | 0 | -1.7674 |
| children | 7p12.2        | 50135681 | 50198852 | 100130988 | <i>C7orf72</i>   | 0 | -1.7906 |
| children | 7p22.1        | 5013615  | 5037800  | 441191    | <i>RNF216P1</i>  | 0 | -1.628  |
| children | 7p12.2        | 50344264 | 50472798 | 10320     | <i>IKZF1</i>     | 0 | -1.7906 |
| children | 7p12.1        | 50511826 | 50518088 | 63979     | <i>FIGNL1</i>    | 0 | -1.7906 |
| children | 7p12.2        | 50526133 | 50628768 | 1644      | <i>DDC</i>       | 0 | -1.7906 |
| children | 7p12.2        | 50657759 | 50772998 | 2887      | <i>GRB10</i>     | 0 | -1.7906 |
| children | 7p22.1        | 5085451  | 5109119  | 57786     | <i>RBAK</i>      | 0 | -1.628  |
| children | 7p12.1        | 51083908 | 51384515 | 23242     | <i>COBL</i>      | 0 | -1.7906 |
| children | 7p22.1        | 5111690  | 5112854  | 389458    | <i>RBAKDN</i>    | 0 | -1.628  |
| children | 7p22.1        | 5160940  | 5184177  | 645700    | <i>ZNF890P</i>   | 0 | -1.628  |
| children | 7p22.1        | 5229834  | 5273486  | 26100     | <i>WIP12</i>     | 0 | -1.628  |
| children | 7p12.1        | 53103348 | 53104618 | 285877    | <i>POM121L12</i> | 0 | -1.8371 |
| children | 7p22.1        | 5322560  | 5343704  | 222962    | <i>SLC29A4</i>   | 0 | -1.628  |
| children | 7p22.1        | 5346422  | 5463177  | 84629     | <i>TNRC18</i>    | 0 | -1.628  |
| children | 7p11.2        | 54268916 | 54270114 | 3262      | <i>HPVC1</i>     | 0 | -1.8371 |
| children | 7p11.2        | 54610017 | 54638773 | 222008    | <i>VSTM2A</i>    | 0 | -1.2277 |
| children | 7p11.2        | 54819939 | 54826939 | 23480     | <i>SEC61G</i>    | 0 | -1.2277 |
| children | 7p12          | 55086724 | 55224644 | 1956      | <i>EGFR</i>      | 0 | -1.2277 |
| children | 7p22.2        | 5515427  | 5553399  | 80028     | <i>FBXL18</i>    | 0 | -1.628  |
| children | 7p22.1        | 5535449  | 5535548  | 693174    | <i>MIR589</i>    | 0 | -1.628  |
| children | 7q31.1-q31.33 | 55433140 | 55501435 | 55915     | <i>LANCL2</i>    | 0 | -1.1538 |
| children | 7p11.2        | 55538305 | 55640200 | 81552     | <i>VOPPI</i>     | 0 | -1.1538 |
| children | 7p22          | 5566778  | 5570232  | 60        | <i>ACTB</i>      | 0 | -1.628  |
| children | 7p11.2        | 55861236 | 55930482 | 346288    | <i>14-Sep</i>    | 0 | -1.1538 |
| children | 7p11.2        | 55954969 | 56009918 | 349075    | <i>ZNF713</i>    | 0 | -1.1538 |
| children | 7p11          | 56019610 | 56023033 | 51373     | <i>MRPS17</i>    | 0 | -1.1538 |
| children | 7p12          | 56032269 | 56067875 | 2631      | <i>GBAS</i>      | 0 | -1.1538 |
| children | 7p11.2        | 56078743 | 56119268 | 5723      | <i>PSPH</i>      | 0 | -1.1538 |
| children | 7p11.2        | 56119377 | 56131682 | 908       | <i>CCT6A</i>     | 0 | -1.1538 |
| children | 7p11.2        | 56128162 | 56128295 | 677803    | <i>SNORA15</i>   | 0 | -1.1538 |
| children | 7q11.1        | 56131916 | 56148365 | 25870     | <i>SUMF2</i>     | 0 | -1.1538 |

|          |        |          |          |           |                     |   |         |
|----------|--------|----------|----------|-----------|---------------------|---|---------|
| children | 7p11.2 | 56147975 | 56160689 | 5260      | <i>PHKG1</i>        | 0 | -1.1538 |
| children | 7p11.2 | 56169265 | 56174187 | 51142     | <i>CHCHD2</i>       | 0 | -1.1538 |
| children | 7p11.2 | 56182373 | 56184090 | 389493    | <i>NUPR1L</i>       | 0 | -1.1538 |
| children | 7p22   | 5632435  | 5646287  | 6624      | <i>FSCN1</i>        | 0 | -1.628  |
| children | 7p11.2 | 56491396 | 56516068 | 650226    | <i>LOC650226</i>    | 0 | -1.1538 |
| children | 7p11.2 | 56563915 | 56564977 | 222029    | <i>DKFZp434L192</i> | 0 | -1.1538 |
| children | 7p22.1 | 5659671  | 5821361  | 54476     | <i>RNF216</i>       | 0 | -1.628  |
| children | 7p22.1 | 5862790  | 5894066  | 401303    | <i>ZNF815P</i>      | 0 | -1.628  |
| children | 7p22.1 | 5920428  | 5925994  | 654231    | <i>OCM</i>          | 0 | -1.628  |
| children | 7p22.1 | 5938340  | 5965603  | 51622     | <i>CCZ1</i>         | 0 | -1.628  |
| children | 7p22.1 | 5965776  | 6010314  | 728194    | <i>RSPH10B2</i>     | 0 | -1.628  |
| children | 7p22.2 | 6012869  | 6048737  | 5395      | <i>PMS2</i>         | 0 | -1.628  |
| children | 7p22   | 6048881  | 6063465  | 7965      | <i>AIMP2</i>        | 0 | -1.628  |
| children | 7p22   | 6061877  | 6098860  | 27102     | <i>EIF2AK1</i>      | 0 | -1.628  |
| children | 7p22   | 6071006  | 6076183  | 100310846 | <i>ANKRD61</i>      | 0 | -1.628  |
| children | 7p22.1 | 6144549  | 6201195  | 84132     | <i>USP42</i>        | 0 | -1.628  |
| children | 7p22.1 | 6201411  | 6312242  | 9265      | <i>CYTH3</i>        | 0 | -1.628  |
| children | 7p22.1 | 6369039  | 6388590  | 84792     | <i>FAM220A</i>      | 0 | -1.628  |
| children | 7p22   | 6414125  | 6443598  | 5879      | <i>RAC1</i>         | 0 | -1.628  |
| children | 7p22.1 | 6448746  | 6487643  | 221955    | <i>DAGLB</i>        | 0 | -1.628  |
| children | 7p22.1 | 6500711  | 6523849  | 11014     | <i>KDEL2</i>        | 0 | -1.628  |
| children | 7p22.1 | 6536408  | 6591067  | 392862    | <i>GRID2IP</i>      | 0 | -1.628  |
| children | 7p22.1 | 6617064  | 6628610  | 55146     | <i>ZDHHC4</i>       | 0 | -1.628  |
| children | 7p22.1 | 6629651  | 6648357  | 79034     | <i>C7orf26</i>      | 0 | -1.628  |
| children | 7p22.1 | 6655526  | 6663921  | 54753     | <i>ZNF853</i>       | 0 | -1.628  |
| children | 7p22.1 | 6728063  | 6746566  | 7559      | <i>ZNF12</i>        | 0 | -1.6493 |
| children | 7p22.1 | 6774935  | 6791232  | 441194    | <i>PMS2CL</i>       | 0 | -1.6493 |
| children | 7p22.1 | 6838565  | 6865926  | 221960    | <i>CCZ1B</i>        | 0 | -1.6493 |
| children | 7p22.1 | 7115400  | 7136417  | 100131257 | <i>LOC100131257</i> | 0 | -1.6493 |
| children | 7p21.3 | 7222245  | 7288280  | 56913     | <i>C1GALT1</i>      | 0 | -1.6493 |
| children | 7p21.3 | 7398243  | 7575460  | 340267    | <i>COL28A1</i>      | 0 | -1.6493 |
| children | 7p21.3 | 7606615  | 7647110  | 54468     | <i>MIOS</i>         | 0 | -1.6493 |
| children | 7p22   | 7676193  | 7758238  | 6119      | <i>RPA3</i>         | 0 | -1.6493 |

|          |              |          |          |        |                  |       |         |
|----------|--------------|----------|----------|--------|------------------|-------|---------|
| children | 7q21         | 79764139 | 79848725 | 2770   | <i>GNAIL</i>     | 0.306 | -1.517  |
| children | 7p21.3       | 8008373  | 8128709  | 113263 | <i>GLCCII</i>    | 0     | -1.6493 |
| children | 7q21.11      | 80087950 | 80141325 | 346562 | <i>GNAT3</i>     | 0.306 | -1.517  |
| children | 7q11.2       | 80231503 | 80303734 | 948    | <i>CD36</i>      | 0.306 | -1.517  |
| children | 7q21-q31     | 80371853 | 80548667 | 10512  | <i>SEMA3C</i>    | 0.306 | -1.517  |
| children | 7q21.1       | 81331443 | 81399452 | 3082   | <i>HGF</i>       | 0.306 | -1.517  |
| children | 7p22         | 8152814  | 8301682  | 3382   | <i>ICAI</i>      | 0     | -1.6493 |
| children | 7q21-q22     | 81575759 | 82073122 | 781    | <i>CACNA2D1</i>  | 0.306 | -1.4022 |
| children | 7q21.11      | 82383320 | 82792197 | 27445  | <i>PCLO</i>      | 0.306 | -1.4022 |
| children | 7q21.11      | 82993221 | 83270747 | 9723   | <i>SEMA3E</i>    | 0.306 | -1.4022 |
| children | 7p12.1       | 83587658 | 83824217 | 10371  | <i>SEMA3A</i>    | 0.306 | -1.4022 |
| children | 7q21.11      | 84624871 | 84751247 | 223117 | <i>SEMA3D</i>    | 0.306 | -1.4022 |
| children | 7p22         | 8473584  | 8792593  | 30010  | <i>NXPFI</i>     | 0     | -1.6493 |
| children | 7q21.1-q21.2 | 86273229 | 86494192 | 2913   | <i>GRM3</i>      | 0.306 | -1.3957 |
| children | 7q21.12      | 86506222 | 86595291 | 222223 | <i>KIAA1324L</i> | 0.306 | -1.3957 |
| children | 7q21         | 86781676 | 86825648 | 9988   | <i>DMTF1</i>     | 0.306 | -1.3957 |
| children | 7q21.12      | 86825477 | 86849031 | 79161  | <i>TMEM243</i>   | 0.306 | -1.3957 |
| children | 7q21.1       | 86954663 | 86974808 | 11257  | <i>TP53TG1</i>   | 0.306 | -1.3957 |
| children | 7q21.1       | 86974950 | 86989425 | 54677  | <i>CROT</i>      | 0.306 | -1.3957 |
| children | 7q21.1       | 87031360 | 87105019 | 5244   | <i>ABCB4</i>     | 0.306 | -1.3957 |
| children | 7q21.12      | 87133178 | 87342639 | 5243   | <i>ABCB1</i>     | 0.306 | -1.3957 |
| children | 7q21.12      | 87257728 | 87461613 | 154661 | <i>RUNDC3B</i>   | 0.306 | -1.3957 |
| children | 7q21.12      | 87463813 | 87505692 | 55972  | <i>SLC25A40</i>  | 0.306 | -1.3957 |
| children | 7q21.3       | 87505543 | 87538856 | 10926  | <i>DBF4</i>      | 0.306 | -1.3957 |
| children | 7q21         | 87563565 | 87811428 | 53616  | <i>ADAM22</i>    | 0.306 | -1.3957 |
| children | 7q21.1       | 87834431 | 87849399 | 6717   | <i>SRI</i>       | 0.306 | -1.3957 |
| children | 7q21.12      | 87905743 | 87936228 | 79689  | <i>STEAP4</i>    | 0.306 | -1.3957 |
| children | 7q21.13      | 88388681 | 88966371 | 219578 | <i>ZNF804B</i>   | 0.306 | -1.3957 |
| children | 7q21.13      | 88423419 | 88425031 | 219557 | <i>C7orf62</i>   | 0.306 | -1.3957 |
| children | 7q21.13      | 89748713 | 89754914 | 442523 | <i>DPY19L2P4</i> | 0.306 | -1.3957 |
| children | 7q21         | 89783688 | 89794141 | 26872  | <i>STEAP1</i>    | 0.306 | -1.3957 |
| children | 7q21.13      | 89840999 | 89866992 | 261729 | <i>STEAP2</i>    | 0.306 | -1.3776 |
| children | 7q21.13      | 89975978 | 90020769 | 85865  | <i>GTPBP10</i>   | 0.306 | -1.3776 |

|          |          |          |          |           |                     |       |         |
|----------|----------|----------|----------|-----------|---------------------|-------|---------|
| children | 7q21     | 90025605 | 90027550 | 101409256 | <i>LOC101409256</i> | 0.306 | -1.3776 |
| children | 7q21     | 90032647 | 90045268 | 9069      | <i>CLDN12</i>       | 0.306 | -1.3776 |
| children | 7q21-q22 | 90338711 | 90839905 | 5218      | <i>CDK14</i>        | 0.306 | -1.3776 |
| children | 7q21     | 90893782 | 90898132 | 8321      | <i>FZD1</i>         | 0.306 | -1.3776 |
| children | 7p21.3   | 9673899  | 9675447  | 168741    | <i>PER4</i>         | 0     | -2.0044 |
| children | 9p24.3   | 1050345  | 1057554  | 10655     | <i>DMRT2</i>        | 0     | -3.6888 |
| children | 9p24.3   | 116230   | 118417   | 2298      | <i>FOXD4</i>        | 0     | -2.2468 |
| children | 9p24.3   | 11986    | 14525    | 100287596 | <i>DDX11L5</i>      | 0     | -1.6447 |
| children | 9p24.3   | 121037   | 179075   | 55871     | <i>CBWD1</i>        | 0     | -2.5826 |
| children | 9p23     | 12693385 | 12710266 | 7306      | <i>TYRP1</i>        | 0     | -4.2889 |
| children | 9p23     | 12775011 | 12823059 | 286343    | <i>LURAPIL</i>      | 0     | -4.2889 |
| children | 9p23     | 13105702 | 13279563 | 8777      | <i>MPDZ</i>         | 0     | -4.2889 |
| children | 9p23     | 13927969 | 13945606 | 100113404 | <i>LINC00583</i>    | 0     | -4.2113 |
| children | 9p24.1   | 14081841 | 14314045 | 4781      | <i>NFIB</i>         | 0     | -4.2113 |
| children | 9p24.3   | 14510    | 29739    | 100287171 | <i>WASH1</i>        | 0     | -1.6447 |
| children | 9p22.3   | 14611068 | 14693480 | 340481    | <i>ZDHC21</i>       | 0     | -4.1734 |
| children | 9p23-p22 | 14719731 | 14722715 | 9350      | <i>CER1</i>         | 0     | -4.1354 |
| children | 9p22.3   | 14734663 | 14779531 | 158326    | <i>FREM1</i>        | 0     | -4.1354 |
| children | 9p22.3   | 14993324 | 15019722 | 389705    | <i>LOC389705</i>    | 0     | -4.1354 |
| children | 9p22.3   | 15170841 | 15250198 | 158219    | <i>TTC39B</i>       | 0     | -3.9407 |
| children | 9p22.3   | 15422781 | 15461627 | 6619      | <i>SNAPC3</i>       | 0     | -4.3397 |
| children | 9p22.3   | 15464064 | 15511017 | 11168     | <i>PSIP1</i>        | 0     | -4.3397 |
| children | 9p22.3   | 15553096 | 15971897 | 203238    | <i>CCDC171</i>      | 0     | -4.3238 |
| children | 9p22.3   | 16203932 | 16253105 | 100129385 | <i>C9orf92</i>      | 0     | -4.3078 |
| children | 9p22.2   | 16409500 | 16870786 | 54796     | <i>BNC2</i>         | 0     | -4.3078 |
| children | 9p22.2   | 17134988 | 17302049 | 54875     | <i>CNTLN</i>        | 0     | -4.3245 |
| children | 9p22     | 17578951 | 17797126 | 6456      | <i>SH3GL2</i>       | 0     | -4.3187 |
| children | 9p21.3   | 18474078 | 18684952 | 92949     | <i>ADAMTSL1</i>     | 0     | -4.8848 |
| children | 9p22.1   | 19049371 | 19051021 | 10670     | <i>RRAGA</i>        | 0     | -4.8848 |
| children | 9p22.1   | 19053134 | 19102940 | 54801     | <i>HAUS6</i>        | 0     | -4.8848 |
| children | 9p22.1   | 19063653 | 19063784 | 677776    | <i>SCARNA8</i>      | 0     | -4.8848 |
| children | 9p22.1   | 19115758 | 19127604 | 123       | <i>PLIN2</i>        | 0     | -4.8848 |
| children | 9p22.1   | 19230762 | 19374266 | 55667     | <i>DENND4C</i>      | 0     | -5.1662 |

|          |        |          |          |           |                   |   |         |
|----------|--------|----------|----------|-----------|-------------------|---|---------|
| children | 9p21   | 19376253 | 19380235 | 6194      | <i>RPS6</i>       | 0 | -5.3818 |
| children | 9p22.1 | 19408924 | 19452500 | 340485    | <i>ACER2</i>      | 0 | -5.3818 |
| children | 9p22.1 | 19507449 | 19787017 | 25769     | <i>SLC24A2</i>    | 0 | -6.6051 |
| children | 9p22.3 | 2015218  | 2193623  | 6595      | <i>SMARCA2</i>    | 0 | -3.742  |
| children | 9p22   | 20341662 | 20622542 | 4300      | <i>MLLT3</i>      | 0 | -8.4101 |
| children | 9p21   | 20658307 | 20995954 | 54914     | <i>FOCAD</i>      | 0 | -9.4703 |
| children | 9p21.3 | 20716103 | 20716187 | 574444    | <i>MIR491</i>     | 0 | -9.8099 |
| children | 9p21   | 21077103 | 21077962 | 3456      | <i>IFNB1</i>      | 0 | -9.8099 |
| children | 9p22   | 21140630 | 21141900 | 3467      | <i>IFNW1</i>      | 0 | -9.8099 |
| children | 9p22   | 21165635 | 21166659 | 3452      | <i>IFNA21</i>     | 0 | -11.656 |
| children | 9p22   | 21186617 | 21187598 | 3441      | <i>IFNA4</i>      | 0 | -11.656 |
| children | 9p22   | 21201467 | 21202204 | 3444      | <i>IFNA7</i>      | 0 | -11.225 |
| children | 9p22   | 21206179 | 21207142 | 3446      | <i>IFNA10</i>     | 0 | -11.225 |
| children | 9p22   | 21216371 | 21217310 | 3449      | <i>IFNA16</i>     | 0 | -11.225 |
| children | 9p22   | 21227241 | 21228221 | 3451      | <i>IFNA17</i>     | 0 | -11.225 |
| children | 9p22   | 21239200 | 21239978 | 3448      | <i>IFNA14</i>     | 0 | -11.225 |
| children | 9p22   | 21277686 | 21278562 | 3453      | <i>IFNA22P</i>    | 0 | -13.605 |
| children | 9p22   | 21304612 | 21305312 | 3442      | <i>IFNA5</i>      | 0 | -13.605 |
| children | 9p24.3 | 213107   | 215893   | 157983    | <i>C9orf66</i>    | 0 | -3.6251 |
| children | 9p22   | 21331017 | 21335429 | 55958     | <i>KLHL9</i>      | 0 | -13.605 |
| children | 9p22   | 21350316 | 21350886 | 3443      | <i>IFNA6</i>      | 0 | -13.605 |
| children | 9p22   | 21367370 | 21368075 | 3447      | <i>IFNA13</i>     | 0 | -13.605 |
| children | 9p22   | 21384253 | 21385396 | 3440      | <i>IFNA2</i>      | 0 | -13.605 |
| children | 9p22   | 21409145 | 21410184 | 3445      | <i>IFNA8</i>      | 0 | -13.605 |
| children | 9p22   | 21440452 | 21441315 | 3439      | <i>IFNA1</i>      | 0 | -13.605 |
| children | 9p21.3 | 21454266 | 21559697 | 554202    | <i>MIR31HG</i>    | 0 | -13.66  |
| children | 9p21.3 | 21480838 | 21482312 | 338376    | <i>IFNE</i>       | 0 | -13.605 |
| children | 9p24.3 | 214864   | 465259   | 81704     | <i>DOCK8</i>      | 0 | -3.657  |
| children | 9p21.3 | 21512113 | 21512184 | 407035    | <i>MIR31</i>      | 0 | -13.605 |
| children | 9p21   | 21802634 | 21865969 | 4507      | <i>MTAP</i>       | 0 | -15.661 |
| children | 9p21   | 21967750 | 21974826 | 1029      | <i>CDKN2A</i>     | 0 | -14.404 |
| children | 9p21.3 | 21994789 | 22077889 | 100048912 | <i>CDKN2B-AS1</i> | 0 | -16.681 |
| children | 9p21   | 22002901 | 22009312 | 1030      | <i>CDKN2B</i>     | 0 | -14.337 |



|          |        |          |          |           |                     |        |         |
|----------|--------|----------|----------|-----------|---------------------|--------|---------|
| children | 9p21.3 | 22446839 | 22452472 | 63951     | <i>DMRTA1</i>       | 0      | -15.06  |
| children | 9p21   | 23690102 | 23821478 | 1993      | <i>ELAVL2</i>       | 0      | -9.2432 |
| children | 9p21.3 | 24543212 | 24545674 | 100129669 | <i>IZUMO3</i>       | 0      | -8.6789 |
| children | 9p21.2 | 25676386 | 25678856 | 286319    | <i>TUSC1</i>        | 0      | -5.9124 |
| children | 9p21.2 | 26066672 | 26118406 | 100506422 | <i>LOC100506422</i> | 0      | -5.9124 |
| children | 9p24   | 2621792  | 2654485  | 7436      | <i>VLDLR</i>        | 0      | -3.742  |
| children | 9p21.2 | 26840682 | 26892826 | 79886     | <i>CAAPI</i>        | 0      | -5.3718 |
| children | 9p21   | 26903367 | 26947468 | 9373      | <i>PLAA</i>         | 0      | -5.3718 |
| children | 9p21.2 | 26947036 | 27062931 | 80173     | <i>IFT74</i>        | 0      | -5.3718 |
| children | 9p21.2 | 26993134 | 27005691 | 64922     | <i>LRRC19</i>       | 0      | -5.3718 |
| children | 9p21   | 27109138 | 27230176 | 7010      | <i>TEK</i>          | 0      | -5.3718 |
| children | 9p24.2 | 2717525  | 2730037  | 169522    | <i>KCNV2</i>        | 0      | -3.742  |
| children | 9p21   | 27245681 | 27282791 | 158035    | <i>LINC00032</i>    | 0      | -5.3718 |
| children | 9p21   | 27284653 | 27297137 | 54586     | <i>EQTN</i>         | 0      | -5.3718 |
| children | 9p21.2 | 27325206 | 27529850 | 79817     | <i>MOB3B</i>        | 0      | -5.3718 |
| children | 9p21.2 | 27546543 | 27573491 | 203228    | <i>C9orf72</i>      | 0      | -5.3718 |
| children | 9p21.2 | 27948083 | 28719303 | 158038    | <i>LINGO2</i>       | 0.2031 | -5.3826 |
| children | 9p24.2 | 2804154  | 2844130  | 9933      | <i>KIAA0020</i>     | 0      | -3.7575 |
| children | 9p21.1 | 28863623 | 28863704 | 100126310 | <i>MIR876</i>       | 0.2071 | -5.3494 |
| children | 9p21.1 | 28888876 | 28888953 | 100126316 | <i>MIR873</i>       | 0.2071 | -5.3494 |
| children | 9p24.2 | 3218296  | 3526001  | 5991      | <i>RFX3</i>         | 0      | -3.7575 |
| children | 9p21.1 | 32384600 | 32450832 | 48        | <i>ACO1</i>         | 0      | -4.0201 |
| children | 9p12   | 32455299 | 32526322 | 23586     | <i>DDX58</i>        | 0      | -4.0201 |
| children | 9p21   | 32540541 | 32552626 | 10210     | <i>TOPORS</i>       | 0      | -4.0201 |
| children | 9p21.1 | 32551141 | 32553015 | 100129250 | <i>TOPORS-AS1</i>   | 0      | -4.0201 |
| children | 9p21.1 | 32553523 | 32573182 | 4712      | <i>NDUFB6</i>       | 0      | -4.0201 |
| children | 9p21.1 | 32629451 | 32635667 | 138474    | <i>TAFIL</i>        | 0      | -4.0201 |
| children | 9p21.1 | 32783496 | 32789199 | 401498    | <i>TMEM215</i>      | 0      | -4.0201 |
| children | 9p13.3 | 32972603 | 33001574 | 54840     | <i>APTX</i>         | 0      | -4.0201 |
| children | 9p13.3 | 33025200 | 33039906 | 3301      | <i>DNAJA1</i>       | 0      | -4.0201 |
| children | 9p12   | 33041849 | 33076714 | 55234     | <i>SMU1</i>         | 0      | -4.0201 |
| children | 9p13   | 33110638 | 33167356 | 2683      | <i>B4GALT1</i>      | 0      | -4.0201 |
| children | 9p13.3 | 33240195 | 33248565 | 27290     | <i>SPINK4</i>       | 0      | -4.0201 |

|          |        |          |          |           |                  |   |         |
|----------|--------|----------|----------|-----------|------------------|---|---------|
| children | 9p12   | 33252469 | 33264759 | 573       | <i>BAG1</i>      | 0 | -4.0201 |
| children | 9p13.3 | 33264876 | 33282067 | 51510     | <i>CHMP5</i>     | 0 | -4.0201 |
| children | 9p13.3 | 33290417 | 33348721 | 4799      | <i>NFX1</i>      | 0 | -4.0201 |
| children | 9p13   | 33384947 | 33402517 | 364       | <i>AQP7</i>      | 0 | -4.0201 |
| children | 9p13   | 33441151 | 33447631 | 360       | <i>AQP3</i>      | 0 | -4.0201 |
| children | 9p13.3 | 33461350 | 33473941 | 65083     | <i>NOL6</i>      | 0 | -4.0201 |
| children | 9p13.3 | 33504534 | 33511164 | 441394    | <i>SUGT1P1</i>   | 0 | -4.0201 |
| children | 9p13.3 | 33524410 | 33573001 | 441459    | <i>ANKRD18B</i>  | 0 | -4.0201 |
| children | 9p13.3 | 33673501 | 33677418 | 11191     | <i>PTENP1</i>    | 0 | -4.0201 |
| children | 9p11.2 | 33750463 | 33799229 | 5646      | <i>PRSS3</i>     | 0 | -4.0201 |
| children | 9p13.3 | 33817181 | 33920401 | 54926     | <i>UBE2R2</i>    | 0 | -3.7921 |
| children | 9p13.3 | 33921690 | 34048947 | 55833     | <i>UBAP2</i>     | 0 | -3.7921 |
| children | 9p13.3 | 33934294 | 33934373 | 101340252 | <i>SNORD121B</i> | 0 | -3.7921 |
| children | 9p13.3 | 33952761 | 33952852 | 100113379 | <i>SNORD121A</i> | 0 | -3.7921 |
| children | 9p13.3 | 34086380 | 34126771 | 25853     | <i>DCAF12</i>    | 0 | -3.7921 |
| children | 9p13.3 | 34179002 | 34252521 | 51271     | <i>UBAP1</i>     | 0 | -3.7921 |
| children | 9p13.3 | 34252377 | 34329198 | 347240    | <i>KIF24</i>     | 0 | -3.7921 |
| children | 9p13   | 34329503 | 34343711 | 318       | <i>NUDT2</i>     | 0 | -3.7921 |
| children | 9p13.3 | 34366663 | 34376894 | 57462     | <i>KIAA1161</i>  | 0 | -3.7921 |
| children | 9p13.3 | 34379016 | 34381598 | 84688     | <i>C9orf24</i>   | 0 | -3.7921 |
| children | 9p24.3 | 34393    | 35864    | 654835    | <i>FAM138C</i>   | 0 | -1.6447 |
| children | 9p13.3 | 34398181 | 34458568 | 203259    | <i>FAM219A</i>   | 0 | -3.7921 |
| children | 9p13.3 | 34458749 | 34520987 | 27019     | <i>DNAIL</i>     | 0 | -3.7921 |
| children | 9p13.3 | 34521039 | 34523037 | 375704    | <i>ENHO</i>      | 0 | -3.7921 |
| children | 9p13   | 34551429 | 34589735 | 1271      | <i>CNTFR</i>     | 0 | -3.7921 |
| children | 9p13.3 | 34610481 | 34612110 | 138716    | <i>RPP25L</i>    | 0 | -3.7921 |
| children | 9p13   | 34613541 | 34620520 | 11258     | <i>DCTN3</i>     | 0 | -3.7921 |
| children | 9p13.3 | 34621454 | 34628011 | 138715    | <i>ARID3C</i>    | 0 | -3.7921 |
| children | 9p13.3 | 34634718 | 34637823 | 10280     | <i>SIGMAR1</i>   | 0 | -3.7921 |
| children | 9p13   | 34646585 | 34650595 | 2592      | <i>GALT</i>      | 0 | -3.7921 |
| children | 9p13   | 34652181 | 34661898 | 3590      | <i>IL11RA</i>    | 0 | -3.7921 |
| children | 9p13   | 34661879 | 34662689 | 10850     | <i>CCL27</i>     | 0 | -3.7921 |
| children | 9p13   | 34689566 | 34691274 | 6363      | <i>CCL19</i>     | 0 | -3.7921 |

|          |          |          |          |        |                  |        |         |
|----------|----------|----------|----------|--------|------------------|--------|---------|
| children | 9p13     | 34709001 | 34710164 | 6366   | <i>CCL21</i>     | 0      | -3.7921 |
| children | 9p12     | 34723049 | 34729535 | 259308 | <i>FAM205A</i>   | 0      | -3.7921 |
| children | 9p13.3   | 34958191 | 34982541 | 23349  | <i>KIAA1045</i>  | 0.2438 | -3.7921 |
| children | 9p13.3   | 34989637 | 34998430 | 25822  | <i>DNAJB5</i>    | 0.2438 | -3.7921 |
| children | 9p13.3   | 35041091 | 35045988 | 138724 | <i>C9orf131</i>  | 0.2438 | -3.7921 |
| children | 9p13.3   | 35056064 | 35072739 | 7415   | <i>VCP</i>       | 0.2438 | -3.7921 |
| children | 9p13     | 35073834 | 35080013 | 2189   | <i>FANCG</i>     | 0.2438 | -3.7921 |
| children | 9p13.3   | 35088684 | 35096546 | 84720  | <i>PIGO</i>      | 0.2438 | -3.7921 |
| children | 9p13.1   | 35099772 | 35103192 | 30968  | <i>STOML2</i>    | 0.2438 | -3.7921 |
| children | 9p13.3   | 35104117 | 35115908 | 80256  | <i>FAM214B</i>   | 0.2438 | -3.7921 |
| children | 9p13.3   | 35161988 | 35405332 | 10497  | <i>UNC13B</i>    | 0.2438 | -3.7921 |
| children | 9p13.3   | 35406751 | 35451105 | 158381 | <i>ATP8B5P</i>   | 0.2438 | -3.4312 |
| children | 9p13.3   | 35489948 | 35561895 | 9853   | <i>RUSC2</i>     | 0.2438 | -3.7507 |
| children | 9p13.3   | 35561826 | 35563896 | 730112 | <i>FAM166B</i>   | 0.2438 | -3.7507 |
| children | 9p13     | 35605280 | 35610038 | 7016   | <i>TESK1</i>     | 0      | -3.731  |
| children | 9p13.3   | 35609975 | 35618424 | 971    | <i>CD72</i>      | 0      | -3.9629 |
| children | 9p13-p12 | 35649296 | 35650947 | 27240  | <i>SIT1</i>      | 0      | -4.2836 |
| children | 9p13.3   | 35657747 | 35658015 | 6023   | <i>RMRP</i>      | 0      | -4.2836 |
| children | 9p13.3   | 35658286 | 35661500 | 203260 | <i>CCDC107</i>   | 0      | -4.2836 |
| children | 9p13.3   | 35659340 | 35665278 | 84904  | <i>ARHGEF39</i>  | 0      | -4.2836 |
| children | 9p13.3   | 35673914 | 35681154 | 768    | <i>CA9</i>       | 0      | -4.2836 |
| children | 9p13     | 35681989 | 35690053 | 7169   | <i>TPM2</i>      | 0      | -4.2836 |
| children | 9p13     | 35697333 | 35732392 | 7094   | <i>TLN1</i>      | 0      | -4.2836 |
| children | 9p13.3   | 35732316 | 35737005 | 10488  | <i>CREB3</i>     | 0      | -4.2836 |
| children | 9p13.3   | 35736862 | 35749225 | 57704  | <i>GBA2</i>      | 0      | -4.2836 |
| children | 9p13.3   | 35749276 | 35753264 | 9827   | <i>RGPI</i>      | 0      | -4.2836 |
| children | 9p13.3   | 35752987 | 35754274 | 692094 | <i>MSMP</i>      | 0      | -4.2836 |
| children | 9p21-p12 | 35792405 | 35809728 | 4882   | <i>NPR2</i>      | 0      | -4.2836 |
| children | 9p13.3   | 35807781 | 35812259 | 26206  | <i>SPAG8</i>     | 0      | -4.2836 |
| children | 9p13.3   | 35812956 | 35815042 | 84681  | <i>HINT2</i>     | 0      | -4.2836 |
| children | 9p13.3   | 35817013 | 35828744 | 392307 | <i>FAM221B</i>   | 0      | -4.2836 |
| children | 9p13.3   | 35829221 | 35847232 | 51754  | <i>TMEM8B</i>    | 0      | -4.2836 |
| children | 9p13.3   | 35860270 | 35865515 | 92973  | <i>LINC00950</i> | 0      | -4.2836 |

|          |            |          |          |           |                  |        |         |
|----------|------------|----------|----------|-----------|------------------|--------|---------|
| children | 9p13.3     | 35869459 | 35870398 | 392309    | <i>OR13J1</i>    | 0      | -4.2836 |
| children | 9p13.3     | 35906188 | 35907138 | 646962    | <i>HRCT1</i>     | 0      | -4.2836 |
| children | 9p13.3     | 35957104 | 35958151 | 56656     | <i>OR2S2</i>     | 0      | -4.3511 |
| children | 9p13.3     | 36036909 | 36124452 | 8434      | <i>RECK</i>      | 0      | -4.3511 |
| children | 9p13.3     | 36136532 | 36163910 | 152007    | <i>GLIPR2</i>    | 0      | -4.3511 |
| children | 9p13.3     | 36169388 | 36171331 | 881       | <i>CCIN</i>      | 0      | -4.3511 |
| children | 9p13       | 36190852 | 36212059 | 1211      | <i>CLTA</i>      | 0      | -4.3511 |
| children | 9p13.3     | 36214438 | 36258496 | 10020     | <i>GNE</i>       | 0      | -4.3511 |
| children | 9p13       | 36336398 | 36400296 | 152006    | <i>RNF38</i>     | 0      | -4.272  |
| children | 9p13.2     | 36572858 | 36677680 | 9833      | <i>MELK</i>      | 0      | -3.9343 |
| children | 9p13       | 36833271 | 37034476 | 5079      | <i>PAX5</i>      | 0      | -3.544  |
| children | 9p13.2     | 36864250 | 36864305 | 100616278 | <i>MIR4540</i>   | 0      | -3.9343 |
| children | 9p13.2     | 37120468 | 37358145 | 84186     | <i>ZCCHC7</i>    | 0      | -2.9001 |
| children | 9q12       | 37422706 | 37436986 | 9380      | <i>GRHPR</i>     | 0.2189 | -2.9001 |
| children | 9p13.2     | 37438099 | 37465407 | 9925      | <i>ZBTB5</i>     | 0.2189 | -2.9001 |
| children | 9p13.2     | 37485931 | 37503694 | 64425     | <i>POLRIE</i>    | 0.2189 | -2.9001 |
| children | 9p13.2     | 37510888 | 37576250 | 26267     | <i>FBXO10</i>    | 0.2189 | -2.9001 |
| children | 9p13.2     | 37588411 | 37592636 | 401505    | <i>TOMM5</i>     | 0.2189 | -2.9001 |
| children | 9p13.2     | 37651051 | 37746901 | 22844     | <i>FRMPD1</i>    | 0.2189 | -2.5806 |
| children | 9p13.2     | 37753799 | 37778969 | 158234    | <i>TRMT10B</i>   | 0.2189 | -2.5806 |
| children | 9p11       | 37779710 | 37785089 | 51010     | <i>EXOSC3</i>    | 0.2189 | -2.5806 |
| children | 9p13.2     | 37800782 | 37867665 | 79269     | <i>DCAF10</i>    | 0      | -2.5806 |
| children | 9p13.3-p12 | 37877571 | 37904350 | 92014     | <i>SLC25A51</i>  | 0      | -2.7985 |
| children | 9p13.2     | 37915894 | 38069210 | 6461      | <i>SHB</i>       | 0      | -2.5433 |
| children | 9p24.2     | 3824127  | 4152183  | 169792    | <i>GLIS3</i>     | 0      | -3.7575 |
| children | 9p11.1     | 38392660 | 38398662 | 219       | <i>ALDH1B1</i>   | 0      | -2.0178 |
| children | 9p13.1     | 38406524 | 38424444 | 347252    | <i>IGFBPL1</i>   | 0      | -2.0178 |
| children | 9p13.1     | 38571360 | 38620360 | 253650    | <i>ANKRD18A</i>  | 0      | -2.0178 |
| children | 9p13.1     | 38621084 | 38623277 | 158228    | <i>FAM201A</i>   | 0      | -2.0178 |
| children | 9p24.2     | 3898645  | 3901248  | 84850     | <i>GLIS3-AS1</i> | 0      | -3.7575 |
| children | 9p24       | 4490426  | 4587469  | 6505      | <i>SLC1A1</i>    | 0      | -3.789  |
| children | 9p24.2     | 4598315  | 4666674  | 55064     | <i>SPATA6L</i>   | 0      | -3.7835 |
| children | 9p24.1     | 4662293  | 4665272  | 403313    | <i>PPAPDC2</i>   | 0      | -3.778  |

|          |            |         |          |        |                 |   |         |
|----------|------------|---------|----------|--------|-----------------|---|---------|
| children | 9p24.1     | 4679552 | 4708398  | 55664  | <i>CDC37L1</i>  | 0 | -3.778  |
| children | 9p24.3     | 470293  | 746106   | 23189  | <i>KANK1</i>    | 0 | -3.6888 |
| children | 9p24.1     | 4709556 | 4726227  | 50808  | <i>AK3</i>      | 0 | -3.778  |
| children | 9p24.1-p23 | 4792833 | 4861077  | 10171  | <i>RCL1</i>     | 0 | -3.778  |
| children | 9p24.1     | 4850296 | 4850375  | 406894 | <i>MIR101-2</i> | 0 | -3.778  |
| children | 9p24       | 4985244 | 5128183  | 3717   | <i>JAK2</i>     | 0 | -3.778  |
| children | 9p24       | 5163862 | 5185618  | 11172  | <i>INSL6</i>    | 0 | -3.778  |
| children | 9p24       | 5231418 | 5233967  | 3641   | <i>INSL4</i>    | 0 | -3.778  |
| children | 9p24.1     | 5299865 | 5304611  | 6019   | <i>RLN2</i>     | 0 | -3.778  |
| children | 9p24.1     | 5334931 | 5339873  | 6013   | <i>RLN1</i>     | 0 | -3.3845 |
| children | 9p24.1     | 5357966 | 5437937  | 55848  | <i>PLGRKT</i>   | 0 | -3.7871 |
| children | 9p24       | 5450502 | 5470567  | 29126  | <i>CD274</i>    | 0 | -3.7871 |
| children | 9p24.2     | 5510544 | 5571282  | 80380  | <i>PDCD1LG2</i> | 0 | -3.7871 |
| children | 9p24       | 5784571 | 5833081  | 79956  | <i>ERMP1</i>    | 0 | -3.7871 |
| children | 9p24.1     | 5890908 | 5909822  | 2315   | <i>MLANA</i>    | 0 | -4.1511 |
| children | 9p24.1     | 5919007 | 6008003  | 158358 | <i>KIAA2026</i> | 0 | -4.1511 |
| children | 9p24.1     | 6011018 | 6015640  | 26953  | <i>RANBP6</i>   | 0 | -4.1511 |
| children | 9p24.1     | 6215785 | 6257983  | 90865  | <i>IL33</i>     | 0 | -4.1511 |
| children | 9p24.1     | 6328348 | 6330918  | 89882  | <i>TPD52L3</i>  | 0 | -4.1511 |
| children | 9p24.1     | 6413150 | 6507051  | 115426 | <i>UHRF2</i>    | 0 | -4.1511 |
| children | 9p22       | 6532463 | 6645692  | 2731   | <i>GLDC</i>     | 0 | -4.1511 |
| children | 9p24.1     | 6720862 | 7077264  | 23081  | <i>KDM4C</i>    | 0 | -4.0646 |
| children | 9p23-p24.3 | 8314245 | 10612723 | 5789   | <i>PTPRD</i>    | 0 | -4.1734 |
| children | 9p24.3     | 841689  | 969090   | 1761   | <i>DMRT1</i>    | 0 | -3.6888 |
| children | 9p24.3     | 976967  | 991732   | 58524  | <i>DMRT3</i>    | 0 | -3.6888 |

**Table S5. Fusion genes identified by RNA-seq in 172 patients**

| Sample ID | Fusion genes        | Frame_info | 5' gene        |                 |            |          | 3' gene     |                 |            |          |
|-----------|---------------------|------------|----------------|-----------------|------------|----------|-------------|-----------------|------------|----------|
|           |                     |            | Gene           | Accession       | Chromosome | Cytoband | Gene        | Accession       | Chromosome | Cytoband |
| A03       | <i>NUP214-ABL1</i>  | in-frame   | <i>NUP214</i>  | ENSG00000126883 | 9          | q34.13   | <i>ABL1</i> | ENSG00000097007 | 9          | q34.12   |
| A03       | <i>EMILIN2-PAX5</i> | in-frame   | <i>EMILIN2</i> | ENSG00000132205 | 18         | p11.31   | <i>PAX5</i> | ENSG00000196092 | 9          | p13.2    |

|     |                        |                    |                |                 |    |        |                 |                 |    |        |
|-----|------------------------|--------------------|----------------|-----------------|----|--------|-----------------|-----------------|----|--------|
| A03 | <i>YIPF5-NR3C1</i>     | UTR/UTR            | <i>YIPF5</i>   | ENSG00000145817 | 5  | q31.3  | <i>NR3C1</i>    | ENSG00000113580 | 5  | q31.3  |
| A04 | <i>MLL-ARHGEF12</i>    | in-frame           | <i>MLL</i>     | ENSG00000118058 | 11 | q23.3  | <i>ARHGEF12</i> | ENSG00000196914 | 11 | q23.3  |
| A05 | <i>RB1-WDFY2</i>       | out-of-frame       | <i>RB1</i>     | ENSG00000139687 | 13 | q14.2  | <i>WDFY2</i>    | ENSG00000139668 | 13 | q14.3  |
| A08 | <i>MSL2-TBL1XR1</i>    | CDS(truncated)/UTR | <i>MSL2</i>    | ENSG00000174579 | 3  | q22.3  | <i>TBL1XR1</i>  | ENSG00000177565 | 3  | q26.32 |
| A10 | <i>ABL1-BCR</i>        | in-frame           | <i>ABL1</i>    | ENSG00000097007 | 9  | q34.12 | <i>BCR</i>      | ENSG00000186716 | 22 | q11.23 |
| A10 | <i>BCR-ABL1</i>        | in-frame           | <i>BCR</i>     | ENSG00000186716 | 22 | q11.23 | <i>ABL1</i>     | ENSG00000097007 | 9  | q34.12 |
| A13 | <i>ABL1-BCR</i>        | in-frame           | <i>ABL1</i>    | ENSG00000097007 | 9  | q34.12 | <i>BCR</i>      | ENSG00000186716 | 22 | q11.23 |
| A13 | <i>BCR-ABL1</i>        | in-frame           | <i>BCR</i>     | ENSG00000186716 | 22 | q11.23 | <i>ABL1</i>     | ENSG00000097007 | 9  | q34.12 |
| A16 | <i>TCF3-PBX1</i>       | in-frame           | <i>TCF3</i>    | ENSG00000071564 | 19 | p13.3  | <i>PBX1</i>     | ENSG00000185630 | 1  | q23.3  |
| A18 | <i>MLL-MLLT1</i>       | in-frame           | <i>MLL</i>     | ENSG00000118058 | 11 | q23.3  | <i>MLLT1</i>    | ENSG00000130382 | 19 | p13.3  |
| A19 | <i>ABL1-BCR</i>        | in-frame           | <i>ABL1</i>    | ENSG00000097007 | 9  | q34.12 | <i>BCR</i>      | ENSG00000186716 | 22 | q11.23 |
| A19 | <i>BCR-ABL1</i>        | in-frame           | <i>BCR</i>     | ENSG00000186716 | 22 | q11.23 | <i>ABL1</i>     | ENSG00000097007 | 9  | q34.12 |
| A19 | <i>PAX5-MLLT3</i>      | in-frame           | <i>PAX5</i>    | ENSG00000196092 | 9  | p13.2  | <i>MLLT3</i>    | ENSG00000171843 | 9  | p21.3  |
| A20 | <i>EP300-ZNF384</i>    | in-frame           | <i>EP300</i>   | ENSG00000100393 | 22 | q13.2  | <i>ZNF384</i>   | ENSG00000126746 | 12 | p13.31 |
| A21 | <i>ABL1-BCR</i>        | in-frame           | <i>ABL1</i>    | ENSG00000097007 | 9  | q34.12 | <i>BCR</i>      | ENSG00000186716 | 22 | q11.23 |
| A21 | <i>BCR-ABL1</i>        | in-frame           | <i>BCR</i>     | ENSG00000186716 | 22 | q11.23 | <i>ABL1</i>     | ENSG00000097007 | 9  | q34.12 |
| A21 | <i>CSNK1G2-MOB3A</i>   | UTR/UTR            | <i>CSNK1G2</i> | ENSG00000133275 | 19 | p13.3  | <i>MOB3A</i>    | ENSG00000172081 | 19 | p13.3  |
| A21 | <i>NDUFA4-SCIN</i>     | in-frame           | <i>NDUFA4</i>  | ENSG00000189043 | 7  | p21.3  | <i>SCIN</i>     | ENSG00000006747 | 7  | p21.3  |
| A22 | <i>ABL1-BCR</i>        | in-frame           | <i>ABL1</i>    | ENSG00000097007 | 9  | q34.12 | <i>BCR</i>      | ENSG00000186716 | 22 | q11.23 |
| A22 | <i>BCR-ABL1</i>        | in-frame           | <i>BCR</i>     | ENSG00000186716 | 22 | q11.23 | <i>ABL1</i>     | ENSG00000097007 | 9  | q34.12 |
| A23 | <i>ABL1-BCR</i>        | in-frame           | <i>ABL1</i>    | ENSG00000097007 | 9  | q34.12 | <i>BCR</i>      | ENSG00000186716 | 22 | q11.23 |
| A23 | <i>BCR-ABL1</i>        | in-frame           | <i>BCR</i>     | ENSG00000186716 | 22 | q11.23 | <i>ABL1</i>     | ENSG00000097007 | 9  | q34.12 |
| A23 | <i>ETV6-PDGFRB</i>     | in-frame           | <i>ETV6</i>    | ENSG00000139083 | 12 | p13.2  | <i>PDGFRB</i>   | ENSG00000113721 | 5  | q32    |
| A26 | <i>TCF3-PBX1</i>       | in-frame           | <i>TCF3</i>    | ENSG00000071564 | 19 | p13.3  | <i>PBX1</i>     | ENSG00000185630 | 1  | q23.3  |
| A30 | <i>ABL1-BCR</i>        | in-frame           | <i>ABL1</i>    | ENSG00000097007 | 9  | q34.12 | <i>BCR</i>      | ENSG00000186716 | 22 | q11.23 |
| A30 | <i>BCR-ABL1</i>        | in-frame           | <i>BCR</i>     | ENSG00000186716 | 22 | q11.23 | <i>ABL1</i>     | ENSG00000097007 | 9  | q34.12 |
| A31 | <i>TCF3-PBX1</i>       | in-frame           | <i>TCF3</i>    | ENSG00000071564 | 19 | p13.3  | <i>PBX1</i>     | ENSG00000185630 | 1  | q23.3  |
| A34 | <i>ABL1-BCR</i>        | in-frame           | <i>ABL1</i>    | ENSG00000097007 | 9  | q34.12 | <i>BCR</i>      | ENSG00000186716 | 22 | q11.23 |
| A34 | <i>BCR-ABL1</i>        | in-frame           | <i>BCR</i>     | ENSG00000186716 | 22 | q11.23 | <i>ABL1</i>     | ENSG00000097007 | 9  | q34.12 |
| A35 | <i>CREBBP-TRBV23-1</i> | CDS(truncated)/CDS | <i>CREBBP</i>  | ENSG00000005339 | 16 | p13.3  | <i>TRBV23-1</i> | ENSG00000211749 | 7  | q34    |
| A35 | <i>EWSR1-ZNF384</i>    | in-frame           | <i>EWSR1</i>   | ENSG00000182944 | 22 | q12.2  | <i>ZNF384</i>   | ENSG00000126746 | 12 | p13.31 |
| A35 | <i>ZNF384-EWSR1</i>    | UTR/CDS(truncated) | <i>ZNF384</i>  | ENSG00000126746 | 12 | p13.31 | <i>EWSR1</i>    | ENSG00000182944 | 22 | q12.2  |
| A36 | <i>CTDPI-PQLC1</i>     | in-frame           | <i>CTDPI</i>   | ENSG00000060069 | 18 | q23    | <i>PQLC1</i>    | ENSG00000122490 | 18 | q23    |

|     |                      |                       |                |                 |    |         |                |                 |    |        |
|-----|----------------------|-----------------------|----------------|-----------------|----|---------|----------------|-----------------|----|--------|
| A36 | <i>EP300-ZNF384</i>  | in-frame              | <i>EP300</i>   | ENSG00000100393 | 22 | q13.2   | <i>ZNF384</i>  | ENSG00000126746 | 12 | p13.31 |
| A37 | <i>EGFL7-METRNL</i>  | UTR/CDS(truncated)    | <i>EGFL7</i>   | ENSG00000172889 | 9  | q34.3   | <i>METRNL</i>  | ENSG00000176845 | 17 | q25.3  |
| A37 | <i>EP300-ZNF384</i>  | in-frame              | <i>EP300</i>   | ENSG00000100393 | 22 | q13.2   | <i>ZNF384</i>  | ENSG00000126746 | 12 | p13.31 |
| A38 | <i>MLL-AFF1</i>      | in-frame              | <i>MLL</i>     | ENSG00000118058 | 11 | q23.3   | <i>AFF1</i>    | ENSG00000172493 | 4  | q22.1  |
| A39 | <i>TCF3-PBX1</i>     | in-frame              | <i>TCF3</i>    | ENSG00000071564 | 19 | p13.3   | <i>PBX1</i>    | ENSG00000185630 | 1  | q23.3  |
| A40 | <i>LCOR-HPSE2</i>    | UTR/CDS(truncated)    | <i>LCOR</i>    | ENSG00000196233 | 10 | q24.1   | <i>HPSE2</i>   | ENSG00000172987 | 10 | q24.2  |
| A41 | <i>MEF2D-BCL9</i>    | in-frame              | <i>MEF2D</i>   | ENSG00000116604 | 1  | q22     | <i>BCL9</i>    | ENSG00000116128 | 1  | q21.2  |
| A41 | <i>RFWD2-TNFSF18</i> | in-frame              | <i>RFWD2</i>   | ENSG00000143207 | 1  | q25.2   | <i>TNFSF18</i> | ENSG00000120337 | 1  | q25.1  |
| A42 | <i>AFF1-MLL</i>      | in-frame              | <i>AFF1</i>    | ENSG00000172493 | 4  | q21.3   | <i>MLL</i>     | ENSG00000118058 | 11 | q23.3  |
| A42 | <i>MLL-AFF1</i>      | in-frame              | <i>MLL</i>     | ENSG00000118058 | 11 | q23.3   | <i>AFF1</i>    | ENSG00000172493 | 4  | q22.1  |
| A43 | <i>EP300-ZNF384</i>  | in-frame              | <i>EP300</i>   | ENSG00000100393 | 22 | q13.2   | <i>ZNF384</i>  | ENSG00000126746 | 12 | p13.31 |
| A43 | <i>METRNL-SKI</i>    | out-of-frame          | <i>METRNL</i>  | ENSG00000176845 | 17 | q25.3   | <i>SKI</i>     | ENSG00000157933 | 1  | p36.33 |
| A43 | <i>PQLC1-CTDP1</i>   | in-frame              | <i>PQLC1</i>   | ENSG00000122490 | 18 | q23     | <i>CTDP1</i>   | ENSG00000060069 | 18 | q23    |
| A43 | <i>TTYH3-MAD1L1</i>  | in-frame              | <i>TTYH3</i>   | ENSG00000136295 | 7  | p22.3   | <i>MAD1L1</i>  | ENSG00000002822 | 7  | p22.3  |
| A46 | <i>IGH-CRLF2</i>     | intergenic/intergenic | <i>IGH</i>     | ENSG00000211899 | 14 | q32.33  | <i>CRLF2</i>   | ENSG00000205755 | X  | p22.33 |
| A47 | <i>CREBBP-ZNF384</i> | in-frame              | <i>CREBBP</i>  | ENSG00000005339 | 16 | p13.3   | <i>ZNF384</i>  | ENSG00000126746 | 12 | p13.31 |
| A47 | <i>ZNF384-CREBBP</i> | UTR/CDS(truncated)    | <i>ZNF384</i>  | ENSG00000126746 | 12 | p13.31  | <i>CREBBP</i>  | ENSG00000005339 | 16 | p13.3  |
| A48 | <i>CD24-RBM3</i>     | UTR/UTR               | <i>CD24</i>    | ENSG00000272398 | Y  | q11.222 | <i>RBM3</i>    | ENSG00000102317 | X  | p11.23 |
| A48 | <i>COPS2-FAM129C</i> | intron\intron         | <i>COPS2</i>   | ENSG00000166200 | 15 | q21.1   | <i>FAM129C</i> | ENSG00000167483 | 19 | p13.11 |
| A48 | <i>FAM129C-COPS2</i> | intron\intron         | <i>FAM129C</i> | ENSG00000167483 | 19 | p13.11  | <i>COPS2</i>   | ENSG00000166200 | 15 | q21.1  |
| A49 | <i>TCF3-PBX1</i>     | in-frame              | <i>TCF3</i>    | ENSG00000071564 | 19 | p13.3   | <i>PBX1</i>    | ENSG00000185630 | 1  | q23.3  |
| A56 | <i>ABL1-BCR</i>      | in-frame              | <i>ABL1</i>    | ENSG00000097007 | 9  | q34.12  | <i>BCR</i>     | ENSG00000186716 | 22 | q11.23 |
| A56 | <i>BCR-ABL1</i>      | in-frame              | <i>BCR</i>     | ENSG00000186716 | 22 | q11.23  | <i>ABL1</i>    | ENSG00000097007 | 9  | q34.12 |
| A57 | <i>ABL1-BCR</i>      | in-frame              | <i>ABL1</i>    | ENSG00000097007 | 9  | q34.12  | <i>BCR</i>     | ENSG00000186716 | 22 | q11.23 |
| A57 | <i>BCR-ABL1</i>      | in-frame              | <i>BCR</i>     | ENSG00000186716 | 22 | q11.23  | <i>ABL1</i>    | ENSG00000097007 | 9  | q34.12 |
| A58 | <i>BCR-ABL1</i>      | in-frame              | <i>BCR</i>     | ENSG00000186716 | 22 | q11.23  | <i>ABL1</i>    | ENSG00000097007 | 9  | q34.12 |
| A59 | <i>ABL1-PRRC2B</i>   | in-frame              | <i>ABL1</i>    | ENSG00000097007 | 9  | q34.12  | <i>PRRC2B</i>  | ENSG00000130723 | 9  | q34.13 |
| A59 | <i>BCR-ABL1</i>      | in-frame              | <i>BCR</i>     | ENSG00000186716 | 22 | q11.23  | <i>ABL1</i>    | ENSG00000097007 | 9  | q34.12 |
| A59 | <i>PAX5-ZCCHC7</i>   | in-frame              | <i>PAX5</i>    | ENSG00000196092 | 9  | p13.2   | <i>ZCCHC7</i>  | ENSG00000147905 | 9  | p13.2  |
| A59 | <i>PRRC2B-BCR</i>    | in-frame              | <i>PRRC2B</i>  | ENSG00000130723 | 9  | q34.13  | <i>BCR</i>     | ENSG00000186716 | 22 | q11.23 |
| A59 | <i>ZCCHC7-PAX5</i>   | in-frame              | <i>ZCCHC7</i>  | ENSG00000147905 | 9  | p13.2   | <i>PAX5</i>    | ENSG00000196092 | 9  | p13.2  |
| A60 | <i>BCR-ABL1</i>      | in-frame              | <i>BCR</i>     | ENSG00000186716 | 22 | q11.23  | <i>ABL1</i>    | ENSG00000097007 | 9  | q34.12 |
| A61 | <i>ABL1-BCR</i>      | in-frame              | <i>ABL1</i>    | ENSG00000097007 | 9  | q34.12  | <i>BCR</i>     | ENSG00000186716 | 22 | q11.23 |

|     |                       |                    |                |                 |    |        |                 |                 |    |        |
|-----|-----------------------|--------------------|----------------|-----------------|----|--------|-----------------|-----------------|----|--------|
| A61 | <i>BCR-ABL1</i>       | in-frame           | <i>BCR</i>     | ENSG00000186716 | 22 | q11.23 | <i>ABL1</i>     | ENSG00000097007 | 9  | q34.12 |
| A62 | <i>ABL1-BCR</i>       | in-frame           | <i>ABL1</i>    | ENSG00000097007 | 9  | q34.12 | <i>BCR</i>      | ENSG00000186716 | 22 | q11.23 |
| A62 | <i>BCR-ABL1</i>       | in-frame           | <i>BCR</i>     | ENSG00000186716 | 22 | q11.23 | <i>ABL1</i>     | ENSG00000097007 | 9  | q34.12 |
| A63 | <i>ABL1-BCR</i>       | in-frame           | <i>ABL1</i>    | ENSG00000097007 | 9  | q34.12 | <i>BCR</i>      | ENSG00000186716 | 22 | q11.23 |
| A63 | <i>BCR-ABL1</i>       | in-frame           | <i>BCR</i>     | ENSG00000186716 | 22 | q11.23 | <i>ABL1</i>     | ENSG00000097007 | 9  | q34.12 |
| A64 | <i>BCR-ABL1</i>       | in-frame           | <i>BCR</i>     | ENSG00000186716 | 22 | q11.23 | <i>ABL1</i>     | ENSG00000097007 | 9  | q34.12 |
| A65 | <i>ABL1-BCR</i>       | in-frame           | <i>ABL1</i>    | ENSG00000097007 | 9  | q34.12 | <i>BCR</i>      | ENSG00000186716 | 22 | q11.23 |
| A65 | <i>BCR-ABL1</i>       | in-frame           | <i>BCR</i>     | ENSG00000186716 | 22 | q11.23 | <i>ABL1</i>     | ENSG00000097007 | 9  | q34.12 |
| A70 | <i>AFF1-MLL</i>       | in-frame           | <i>AFF1</i>    | ENSG00000172493 | 4  | q21.3  | <i>MLL</i>      | ENSG00000118058 | 11 | q23.3  |
| A70 | <i>MLL-AFF1</i>       | in-frame           | <i>MLL</i>     | ENSG00000118058 | 11 | q23.3  | <i>AFF1</i>     | ENSG00000172493 | 4  | q22.1  |
| A73 | <i>EP300-ZNF384</i>   | in-frame           | <i>EP300</i>   | ENSG00000100393 | 22 | q13.2  | <i>ZNF384</i>   | ENSG00000126746 | 12 | p13.31 |
| A73 | <i>LPAR5-EP300</i>    | UTR/CDS(truncated) | <i>LPAR5</i>   | ENSG00000184574 | 12 | p13.31 | <i>EP300</i>    | ENSG00000100393 | 22 | q13.2  |
| A74 | <i>DAZAP1-MEF2D</i>   | out-of-frame       | <i>DAZAP1</i>  | ENSG00000071626 | 19 | p13.3  | <i>MEF2D</i>    | ENSG00000116604 | 1  | q22    |
| A74 | <i>MEF2D-DAZAP1</i>   | in-frame           | <i>MEF2D</i>   | ENSG00000116604 | 1  | q22    | <i>DAZAP1</i>   | ENSG00000071626 | 19 | p13.3  |
| A75 | <i>MEF2D-HNRNPUL1</i> | in-frame           | <i>MEF2D</i>   | ENSG00000116604 | 1  | q22    | <i>HNRNPUL1</i> | ENSG00000105323 | 19 | q13.2  |
| A76 | <i>TCF3-PBX1</i>      | in-frame           | <i>TCF3</i>    | ENSG00000071564 | 19 | p13.3  | <i>PBX1</i>     | ENSG00000185630 | 1  | q23.3  |
| A77 | <i>ANKRD11-SPG7</i>   | intronic/UTR       | <i>ANKRD11</i> | ENSG00000167522 | 16 | q24.3  | <i>SPG7</i>     | ENSG00000197912 | 16 | q24.3  |
| A77 | <i>ANKRD11-SPG7</i>   | UTR/CDS(truncated) | <i>ANKRD11</i> | ENSG00000167522 | 16 | q24.3  | <i>SPG7</i>     | ENSG00000197912 | 16 | q24.3  |
| A77 | <i>BCR-ABL1</i>       | in-frame           | <i>BCR</i>     | ENSG00000186716 | 22 | q11.23 | <i>ABL1</i>     | ENSG00000097007 | 9  | q34.12 |
| A77 | <i>PALM-NCLN</i>      | in-frame           | <i>PALM</i>    | ENSG00000099864 | 19 | p13.3  | <i>NCLN</i>     | ENSG00000125912 | 19 | p13.3  |
| A78 | <i>ABL1-BCR</i>       | in-frame           | <i>ABL1</i>    | ENSG00000097007 | 9  | q34.12 | <i>BCR</i>      | ENSG00000186716 | 22 | q11.23 |
| A78 | <i>BCR-ABL1</i>       | in-frame           | <i>BCR</i>     | ENSG00000186716 | 22 | q11.23 | <i>ABL1</i>     | ENSG00000097007 | 9  | q34.12 |
| A79 | <i>BCR-ABL1</i>       | in-frame           | <i>BCR</i>     | ENSG00000186716 | 22 | q11.23 | <i>ABL1</i>     | ENSG00000097007 | 9  | q34.12 |
| A82 | <i>TCF3-PBX1</i>      | in-frame           | <i>TCF3</i>    | ENSG00000071564 | 19 | p13.3  | <i>PBX1</i>     | ENSG00000185630 | 1  | q23.3  |
| A82 | <i>SLC12A7-NKD2</i>   | in-frame           | <i>SLC12A7</i> | ENSG00000113504 | 5  | p15.33 | <i>NKD2</i>     | ENSG00000145506 | 5  | p15.33 |
| A82 | <i>MF12-TNK2</i>      | out-of-frame       | <i>MF12</i>    | ENSG00000163975 | 3  | q29    | <i>TNK2</i>     | ENSG00000061938 | 3  | q29    |
| A82 | <i>TTYH3-MAD1L1</i>   | in-frame           | <i>TTYH3</i>   | ENSG00000136295 | 7  | p22.3  | <i>MAD1L1</i>   | ENSG00000002822 | 7  | p22.3  |
| A82 | <i>FGFRL1-CTBP1</i>   | in-frame           | <i>FGFRL1</i>  | ENSG00000127418 | 4  | p16.3  | <i>CTBP1</i>    | ENSG00000159692 | 4  | p16.3  |
| A82 | <i>MF12-FYTTD1</i>    | in-frame           | <i>MF12</i>    | ENSG00000163975 | 3  | q29    | <i>FYTTD1</i>   | ENSG00000122068 | 3  | q29    |
| A83 | <i>EP300-ZNF384</i>   | in-frame           | <i>EP300</i>   | ENSG00000100393 | 22 | q13.2  | <i>ZNF384</i>   | ENSG00000126746 | 12 | p13.31 |
| A86 | <i>TAF15-ZNF384</i>   | in-frame           | <i>TAF15</i>   | ENSG00000270647 | 17 | q12    | <i>ZNF384</i>   | ENSG00000126746 | 12 | p13.31 |
| A86 | <i>ING4-C17ORF50</i>  | in-frame           | <i>ING4</i>    | ENSG00000111653 | 12 | p13.31 | <i>C17ORF50</i> | ENSG00000270806 | 17 | q12    |
| A86 | <i>TPM4-METRNL</i>    | out-of-frame       | <i>TPM4</i>    | ENSG00000167460 | 19 | p13.12 | <i>METRNL</i>   | ENSG00000176845 | 17 | q25.3  |



|      |                       |                    |               |                 |    |        |                 |                  |    |        |
|------|-----------------------|--------------------|---------------|-----------------|----|--------|-----------------|------------------|----|--------|
| A87  | <i>PAX5-JAK2</i>      | in-frame           | <i>PAX5</i>   | ENSG00000196092 | 9  | p13.2  | <i>JAK2</i>     | ENSG00000096968  | 9  | p24.1  |
| A88  | <i>UQCRC1-ANO10</i>   | out-of-frame       | <i>UQCRC1</i> | ENSG00000010256 | 3  | p21.31 | <i>ANO10</i>    | ENSG000000160746 | 3  | p22.1  |
| A89  | <i>JAK2-SNX29</i>     | in-frame           | <i>JAK2</i>   | ENSG00000096968 | 9  | p24.1  | <i>SNX29</i>    | ENSG00000048471  | 16 | p13.13 |
| A89  | <i>SNX29-JAK2</i>     | in-frame           | <i>SNX29</i>  | ENSG00000048471 | 16 | p13.13 | <i>JAK2</i>     | ENSG00000096968  | 9  | p24.1  |
| A91  | <i>TCF3-PBX1</i>      | in-frame           | <i>TCF3</i>   | ENSG00000071564 | 19 | p13.3  | <i>PBX1</i>     | ENSG000000185630 | 1  | q23.3  |
| A91  | <i>UBAP1-DCAF12</i>   | out-of-frame       | <i>UBAP1</i>  | ENSG00000165006 | 9  | p13.3  | <i>DCAF12</i>   | ENSG000000198876 | 9  | p13.3  |
| A93  | <i>LILRA2-CCBE1</i>   | UTR/UTR            | <i>LILRA2</i> | ENSG00000239998 | 19 | q13.42 | <i>CCBE1</i>    | ENSG000000183287 | 18 | q21.32 |
| A93  | <i>RAP1B-EMR2</i>     | intron\3'UTR       | <i>RAP1B</i>  | ENSG00000127314 | 12 | q15    | <i>EMR2</i>     | ENSG000000127507 | 19 | p13.12 |
| A94  | <i>TCF3-PBX1</i>      | in-frame           | <i>TCF3</i>   | ENSG00000071564 | 19 | p13.3  | <i>PBX1</i>     | ENSG000000185630 | 1  | q23.3  |
| AC11 | <i>ABL1-BCR</i>       | in-frame           | <i>ABL1</i>   | ENSG00000097007 | 9  | q34.12 | <i>BCR</i>      | ENSG000000186716 | 22 | q11.23 |
| AC11 | <i>BCR-ABL1</i>       | in-frame           | <i>BCR</i>    | ENSG00000186716 | 22 | q11.23 | <i>ABL1</i>     | ENSG00000097007  | 9  | q34.12 |
| B03  | <i>BCR-ABL1</i>       | in-frame           | <i>BCR</i>    | ENSG00000186716 | 22 | q11.23 | <i>ABL1</i>     | ENSG00000097007  | 9  | q34.12 |
| B03  | <i>ABL1-BCR</i>       | in-frame           | <i>ABL1</i>   | ENSG00000097007 | 9  | q34.12 | <i>BCR</i>      | ENSG000000186716 | 22 | q11.23 |
| B12  | <i>MEF2D-BCL9</i>     | in-frame           | <i>MEF2D</i>  | ENSG00000116604 | 1  | q22    | <i>BCL9</i>     | ENSG000000116128 | 1  | q21.2  |
| B15  | <i>MLL-MLLT3</i>      | in-frame           | <i>MLL</i>    | ENSG00000118058 | 11 | q23.3  | <i>MLLT3</i>    | ENSG000000171843 | 9  | p21.3  |
| B15  | <i>ZNF124-PUS3</i>    | CDS(truncated)/UTR | <i>ZNF124</i> | ENSG00000196418 | 1  | q44    | <i>PUS3</i>     | ENSG000000110060 | 11 | q24.2  |
| B16  | <i>WSB1-HYPK</i>      | 5'UTR/3'UTR        | <i>WSB1</i>   | ENSG00000109046 | 17 | q11.1  | <i>HYPK</i>     | ENSG000000242028 | 15 | q15.3  |
| B17  | <i>P2RY8-CRLF2</i>    | UTR/UTR            | <i>P2RY8</i>  | ENSG00000182162 | X  | p22.33 | <i>CRLF2</i>    | ENSG000000205755 | X  | p22.33 |
| B18  | <i>BCR-ABL1</i>       | in-frame           | <i>BCR</i>    | ENSG00000186716 | 22 | q11.23 | <i>ABL1</i>     | ENSG00000097007  | 9  | q34.12 |
| B18  | <i>ABL1-BCR</i>       | in-frame           | <i>ABL1</i>   | ENSG00000097007 | 9  | q34.12 | <i>BCR</i>      | ENSG000000186716 | 22 | q11.23 |
| B18  | <i>ZNF124-PUS3</i>    | CDS(truncated)/UTR | <i>ZNF124</i> | ENSG00000196418 | 1  | q44    | <i>PUS3</i>     | ENSG000000110060 | 11 | q24.2  |
| C01  | <i>TCF3-ZNF384</i>    | in-frame           | <i>TCF3</i>   | ENSG00000071564 | 19 | p13.3  | <i>ZNF384</i>   | ENSG000000126746 | 12 | p13.31 |
| C01  | <i>ZNF384-RNF180</i>  | UTR/CDS(truncated) | <i>ZNF384</i> | ENSG00000126746 | 12 | p13.31 | <i>RNF180</i>   | ENSG000000164197 | 5  | q12.3  |
| C08  | <i>MEF2D-HNRNPUL1</i> | in-frame           | <i>MEF2D</i>  | ENSG00000116604 | 1  | q22    | <i>HNRNPUL1</i> | ENSG000000105323 | 19 | q13.2  |
| C15  | <i>TCF3-HLF</i>       | in-frame           | <i>TCF3</i>   | ENSG00000071564 | 19 | p13.3  | <i>HLF</i>      | ENSG000000108924 | 17 | q22    |
| C18  | <i>ETV6-RUNX1</i>     | in-frame           | <i>ETV6</i>   | ENSG00000139083 | 12 | p13.2  | <i>RUNX1</i>    | ENSG000000159216 | 21 | q22.12 |
| C18  | <i>RUNX1-ETV6</i>     | in-frame           | <i>RUNX1</i>  | ENSG00000159216 | 21 | q22.12 | <i>ETV6</i>     | ENSG000000139083 | 12 | p13.2  |
| C19  | <i>TCF3-PBX1</i>      | in-frame           | <i>TCF3</i>   | ENSG00000071564 | 19 | p13.3  | <i>PBX1</i>     | ENSG000000185630 | 1  | q23.3  |
| C20  | <i>ETV6-RUNX1</i>     | in-frame           | <i>ETV6</i>   | ENSG00000139083 | 12 | p13.2  | <i>RUNX1</i>    | ENSG000000159216 | 21 | q22.12 |
| C20  | <i>RUNX1-ETV6</i>     | in-frame           | <i>RUNX1</i>  | ENSG00000159216 | 21 | q22.12 | <i>ETV6</i>     | ENSG000000139083 | 12 | p13.2  |
| C24  | <i>TCF3-PBX1</i>      | in-frame           | <i>TCF3</i>   | ENSG00000071564 | 19 | p13.3  | <i>PBX1</i>     | ENSG000000185630 | 1  | q23.3  |
| C25  | <i>ETV6-RUNX1</i>     | in-frame           | <i>ETV6</i>   | ENSG00000139083 | 12 | p13.2  | <i>RUNX1</i>    | ENSG000000159216 | 21 | q22.12 |
| C25  | <i>RUNX1-ETV6</i>     | in-frame           | <i>RUNX1</i>  | ENSG00000159216 | 21 | q22.12 | <i>ETV6</i>     | ENSG000000139083 | 12 | p13.2  |

|     |                       |                    |                |                 |    |        |                |                 |    |        |
|-----|-----------------------|--------------------|----------------|-----------------|----|--------|----------------|-----------------|----|--------|
| C27 | <i>ACINI-NUTMI</i>    | in-frame           | <i>ACINI</i>   | ENSG00000100813 | 14 | q11.2  | <i>NUTMI</i>   | ENSG00000184507 | 15 | q14    |
| C28 | <i>ETV6-RUNX1</i>     | in-frame           | <i>ETV6</i>    | ENSG00000139083 | 12 | p13.2  | <i>RUNX1</i>   | ENSG00000159216 | 21 | q22.12 |
| C28 | <i>RUNX1-ETV6</i>     | in-frame           | <i>RUNX1</i>   | ENSG00000159216 | 21 | q22.12 | <i>ETV6</i>    | ENSG00000139083 | 12 | p13.2  |
| C29 | <i>ETV6-RUNX1</i>     | in-frame           | <i>ETV6</i>    | ENSG00000139083 | 12 | p13.2  | <i>RUNX1</i>   | ENSG00000159216 | 21 | q22.12 |
| C29 | <i>RUNX1-ETV6</i>     | in-frame           | <i>RUNX1</i>   | ENSG00000159216 | 21 | q22.12 | <i>ETV6</i>    | ENSG00000139083 | 12 | p13.2  |
| C30 | <i>DCAF8-DNM3</i>     | out-of-frame       | <i>DCAF8</i>   | ENSG00000132716 | 1  | q23.2  | <i>DNM3</i>    | ENSG00000197959 | 1  | q24.3  |
| C30 | <i>MEF2D-BCL9</i>     | in-frame           | <i>MEF2D</i>   | ENSG00000116604 | 1  | q22    | <i>BCL9</i>    | ENSG00000116128 | 1  | q21.2  |
| C32 | <i>TCF3-PBX1</i>      | in-frame           | <i>TCF3</i>    | ENSG00000071564 | 19 | p13.3  | <i>PBX1</i>    | ENSG00000185630 | 1  | q23.3  |
| C33 | <i>ETV6-ABL1</i>      | in-frame           | <i>ETV6</i>    | ENSG00000139083 | 12 | p13.2  | <i>ABL1</i>    | ENSG00000097007 | 9  | q34.12 |
| C33 | <i>NIN-TMX1</i>       | UTR/CDS(truncated) | <i>NIN</i>     | ENSG00000100503 | 14 | q22.1  | <i>TMX1</i>    | ENSG00000139921 | 14 | q22.1  |
| C34 | <i>ETV6-RUNX1</i>     | in-frame           | <i>ETV6</i>    | ENSG00000139083 | 12 | p13.2  | <i>RUNX1</i>   | ENSG00000159216 | 21 | q22.12 |
| C35 | <i>ETV6-RUNX1</i>     | in-frame           | <i>ETV6</i>    | ENSG00000139083 | 12 | p13.2  | <i>RUNX1</i>   | ENSG00000159216 | 21 | q22.12 |
| C35 | <i>RUNX1-ETV6</i>     | in-frame           | <i>RUNX1</i>   | ENSG00000159216 | 21 | q22.12 | <i>ETV6</i>    | ENSG00000139083 | 12 | p13.2  |
| C36 | <i>BCR-ABL1</i>       | in-frame           | <i>BCR</i>     | ENSG00000186716 | 22 | q11.23 | <i>ABL1</i>    | ENSG00000097007 | 9  | q34.12 |
| C36 | <i>FAM60A-SEPT9</i>   | UTR/CDS(truncated) | <i>FAM60A</i>  | ENSG00000139146 | 12 | p11.21 | <i>SEPT9</i>   | ENSG00000184640 | 17 | q25.3  |
| C37 | <i>EP300-ZNF384</i>   | in-frame           | <i>EP300</i>   | ENSG00000100393 | 22 | q13.2  | <i>ZNF384</i>  | ENSG00000126746 | 12 | p13.31 |
| C37 | <i>ZNF384-EP300</i>   | UTR/CDS(truncated) | <i>ZNF384</i>  | ENSG00000126746 | 12 | p13.31 | <i>EP300</i>   | ENSG00000100393 | 22 | q13.2  |
| C38 | <i>ABL1-BCR</i>       | in-frame           | <i>ABL1</i>    | ENSG00000097007 | 9  | q34.12 | <i>BCR</i>     | ENSG00000186716 | 22 | q11.23 |
| C38 | <i>BCR-ABL1</i>       | in-frame           | <i>BCR</i>     | ENSG00000186716 | 22 | q11.23 | <i>ABL1</i>    | ENSG00000097007 | 9  | q34.12 |
| C38 | <i>RCAN1-SPRY1</i>    | CDS(truncated)/UTR | <i>RCAN1</i>   | ENSG00000159200 | 21 | q22.12 | <i>SPRY1</i>   | ENSG00000164056 | 4  | q28.1  |
| C39 | <i>TCF3-PBX1</i>      | in-frame           | <i>TCF3</i>    | ENSG00000071564 | 19 | p13.3  | <i>PBX1</i>    | ENSG00000185630 | 1  | q23.3  |
| C40 | <i>TSC2-ATP6V0C</i>   | out-of-frame       | <i>TSC2</i>    | ENSG00000103197 | 16 | p13.3  | <i>ATP6V0C</i> | ENSG00000185883 | 16 | p13.3  |
| C41 | <i>SMARCA2-ZNF362</i> | in-frame           | <i>SMARCA2</i> | ENSG00000080503 | 9  | p24.3  | <i>ZNF362</i>  | ENSG00000160094 | 1  | p35.1  |
| C41 | <i>ZNF362-SMARCA2</i> | in-frame           | <i>ZNF362</i>  | ENSG00000160094 | 1  | p35.1  | <i>SMARCA2</i> | ENSG00000080503 | 9  | p24.3  |
| C43 | <i>ETV6-RUNX1</i>     | in-frame           | <i>ETV6</i>    | ENSG00000139083 | 12 | p13.2  | <i>RUNX1</i>   | ENSG00000159216 | 21 | q22.12 |
| C43 | <i>RUNX1-ETV6</i>     | in-frame           | <i>RUNX1</i>   | ENSG00000159216 | 21 | q22.12 | <i>ETV6</i>    | ENSG00000139083 | 12 | p13.2  |
| C44 | <i>BRWD1-ETS2</i>     | CDS(truncated)/UTR | <i>BRWD1</i>   | ENSG00000185658 | 21 | q22.2  | <i>ETS2</i>    | ENSG00000157557 | 21 | q22.2  |
| C44 | <i>HNRNPU-ZBTB18</i>  | in-frame           | <i>HNRNPU</i>  | ENSG00000153187 | 1  | q44    | <i>ZBTB18</i>  | ENSG00000179456 | 1  | q44    |
| C45 | <i>CSNK1D-METRNL</i>  | out-of-frame       | <i>CSNK1D</i>  | ENSG00000141551 | 17 | q25.3  | <i>METRNL</i>  | ENSG00000176845 | 17 | q25.3  |
| C45 | <i>MBP-TGIF1</i>      | in-frame           | <i>MBP</i>     | ENSG00000197971 | 18 | q23    | <i>TGIF1</i>   | ENSG00000177426 | 18 | p11.31 |
| C45 | <i>P2RY8-ZBED1</i>    | UTR/UTR            | <i>P2RY8</i>   | ENSG00000182162 | X  | p22.33 | <i>ZBED1</i>   | ENSG00000214717 | X  | p22.33 |
| C45 | <i>P2RY8-ZBED1</i>    | intronic/UTR       | <i>P2RY8</i>   | ENSG00000182162 | X  | p22.33 | <i>ZBED1</i>   | ENSG00000214717 | X  | p22.33 |
| C47 | <i>EP300-ZNF384</i>   | in-frame           | <i>EP300</i>   | ENSG00000100393 | 22 | q13.2  | <i>ZNF384</i>  | ENSG00000126746 | 12 | p13.31 |

|     |                         |                    |                |                 |    |        |                 |                 |    |        |
|-----|-------------------------|--------------------|----------------|-----------------|----|--------|-----------------|-----------------|----|--------|
| C49 | <i>NUP214-ABL1</i>      | in-frame           | <i>NUP214</i>  | ENSG00000126883 | 9  | q34.13 | <i>ABL1</i>     | ENSG00000097007 | 9  | q34.12 |
| C51 | <i>HBA1-CD74</i>        | UTR/UTR            | <i>HBA1</i>    | ENSG00000206172 | 16 | p13.3  | <i>CD74</i>     | ENSG00000019582 | 5  | q32    |
| C57 | <i>RUNX1-ETV6</i>       | in-frame           | <i>RUNX1</i>   | ENSG00000159216 | 21 | q22.12 | <i>ETV6</i>     | ENSG00000139083 | 12 | p13.2  |
| C57 | <i>ETV6-RUNX1</i>       | in-frame           | <i>ETV6</i>    | ENSG00000139083 | 12 | p13.2  | <i>RUNX1</i>    | ENSG00000159216 | 21 | q22.12 |
| C57 | <i>RTN3-STIP1</i>       | out-of-frame       | <i>RTN3</i>    | ENSG00000133318 | 11 | q13.1  | <i>STIP1</i>    | ENSG00000168439 | 11 | q13.1  |
| C58 | <i>RUNX1-ETV6</i>       | intronic/UTR       | <i>RUNX1</i>   | ENSG00000159216 | 21 | q22.12 | <i>ETV6</i>     | ENSG00000139083 | 12 | p13.2  |
| C58 | <i>ETV6-RUNX1</i>       | in-frame           | <i>ETV6</i>    | ENSG00000139083 | 12 | p13.2  | <i>RUNX1</i>    | ENSG00000159216 | 21 | q22.12 |
| C61 | <i>ANKRD45-HOOK3</i>    | UTR/UTR            | <i>ANKRD45</i> | ENSG00000183831 | 1  | q25.1  | <i>HOOK3</i>    | ENSG00000168172 | 8  | p11.21 |
| C63 | <i>PAX5-AUTS2</i>       | in-frame           | <i>PAX5</i>    | ENSG00000196092 | 9  | p13.2  | <i>AUTS2</i>    | ENSG00000158321 | 7  | q11.22 |
| C64 | <i>WDR4-PDE9A</i>       | out-of-frame       | <i>WDR4</i>    | ENSG00000160193 | 21 | q22.3  | <i>PDE9A</i>    | ENSG00000160191 | 21 | q22.3  |
| C64 | <i>SMARCC1-CDK5RAP3</i> | out-of-frame       | <i>SMARCC1</i> | ENSG00000173473 | 3  | p21.31 | <i>CDK5RAP3</i> | ENSG00000108465 | 17 | q21.32 |
| C66 | <i>CD74-PDGFRB</i>      | in-frame           | <i>CD74</i>    | ENSG00000019582 | 5  | q32    | <i>PDGFRB</i>   | ENSG00000113721 | 5  | q32    |
| C67 | <i>ABL1-BCR</i>         | in-frame           | <i>ABL1</i>    | ENSG00000097007 | 9  | q34.12 | <i>BCR</i>      | ENSG00000186716 | 22 | q11.23 |
| C67 | <i>BCR-ABL1</i>         | in-frame           | <i>BCR</i>     | ENSG00000186716 | 22 | q11.23 | <i>ABL1</i>     | ENSG00000097007 | 9  | q34.12 |
| C67 | <i>KDM4B-CUL2</i>       | in-frame           | <i>KDM4B</i>   | ENSG00000127663 | 19 | p13.3  | <i>CUL2</i>     | ENSG00000108094 | 10 | p11.21 |
| C68 | <i>FUS-ERG</i>          | in-frame           | <i>FUS</i>     | ENSG00000089280 | 16 | p11.2  | <i>ERG</i>      | ENSG00000157554 | 21 | q22.2  |
| C68 | <i>ERG-FUS</i>          | in-frame           | <i>ERG</i>     | ENSG00000157554 | 21 | q22.2  | <i>FUS</i>      | ENSG00000089280 | 16 | p11.2  |
| C69 | <i>RUNX1-ETV6</i>       | in-frame           | <i>RUNX1</i>   | ENSG00000159216 | 21 | q22.12 | <i>ETV6</i>     | ENSG00000139083 | 12 | p13.2  |
| C69 | <i>ETV6-RUNX1</i>       | in-frame           | <i>ETV6</i>    | ENSG00000139083 | 12 | p13.2  | <i>RUNX1</i>    | ENSG00000159216 | 21 | q22.12 |
| C69 | <i>UBA2-PPP1R36</i>     | in-frame           | <i>UBA2</i>    | ENSG00000126261 | 19 | q13.11 | <i>PPP1R36</i>  | ENSG00000165807 | 14 | q23.3  |
| C69 | <i>CDK1-DGKH</i>        | in-frame           | <i>CDK1</i>    | ENSG00000170312 | 10 | q21.2  | <i>DGKH</i>     | ENSG00000102780 | 13 | q14.11 |
| C69 | <i>SKP1-AFF4</i>        | UTR/CDS(truncated) | <i>SKP1</i>    | ENSG00000113558 | 5  | q31.1  | <i>AFF4</i>     | ENSG00000072364 | 5  | q31.1  |
| C72 | <i>CDKN2A-IGK@</i>      | UTR/---            | <i>CDKN2A</i>  | ENSG00000147889 | 9  | p21.3  | <i>IGK@</i>     | ENSG09000000012 | 2  | p11.2  |
| C73 | <i>TCF3-PBX1</i>        | in-frame           | <i>TCF3</i>    | ENSG00000071564 | 19 | p13.3  | <i>PBX1</i>     | ENSG00000185630 | 1  | q23.3  |
| C75 | <i>ETV6-RUNX1</i>       | in-frame           | <i>ETV6</i>    | ENSG00000139083 | 12 | p13.2  | <i>RUNX1</i>    | ENSG00000159216 | 21 | q22.12 |
| C75 | <i>RUNX1-ETV6</i>       | in-frame           | <i>RUNX1</i>   | ENSG00000159216 | 21 | q22.12 | <i>ETV6</i>     | ENSG00000139083 | 12 | p13.2  |
| C76 | <i>TCF3-PBX1</i>        | in-frame           | <i>TCF3</i>    | ENSG00000071564 | 19 | p13.3  | <i>PBX1</i>     | ENSG00000185630 | 1  | q23.3  |
| C76 | <i>BACH2-PNRC1</i>      | UTR/CDS(truncated) | <i>BACH2</i>   | ENSG00000112182 | 6  | q15    | <i>PNRC1</i>    | ENSG00000146278 | 6  | q15    |
| C79 | <i>ETV6-RUNX1</i>       | in-frame           | <i>ETV6</i>    | ENSG00000139083 | 12 | p13.2  | <i>RUNX1</i>    | ENSG00000159216 | 21 | q22.12 |
| C79 | <i>RUNX1-ETV6</i>       | in-frame           | <i>RUNX1</i>   | ENSG00000159216 | 21 | q22.12 | <i>ETV6</i>     | ENSG00000139083 | 12 | p13.2  |
| C80 | <i>TCF3-ZNF384</i>      | in-frame           | <i>TCF3</i>    | ENSG00000071564 | 19 | p13.3  | <i>ZNF384</i>   | ENSG00000126746 | 12 | p13.31 |
| C80 | <i>PLK5-ATN1</i>        | UTR/CDS(truncated) | <i>PLK5</i>    | ENSG00000185988 | 19 | p13.3  | <i>ATN1</i>     | ENSG00000111676 | 12 | p13.31 |
| C81 | <i>ETV6-RUNX1</i>       | in-frame           | <i>ETV6</i>    | ENSG00000139083 | 12 | p13.2  | <i>RUNX1</i>    | ENSG00000159216 | 21 | q22.12 |

|     |                     |                         |                |                 |    |        |                |                 |    |        |
|-----|---------------------|-------------------------|----------------|-----------------|----|--------|----------------|-----------------|----|--------|
| C81 | <i>RUNX1-ETV6</i>   | in-frame                | <i>RUNX1</i>   | ENSG00000159216 | 21 | q22.12 | <i>ETV6</i>    | ENSG00000139083 | 12 | p13.2  |
| C82 | <i>ETV6-RUNX1</i>   | in-frame                | <i>ETV6</i>    | ENSG00000139083 | 12 | p13.2  | <i>RUNX1</i>   | ENSG00000159216 | 21 | q22.12 |
| C82 | <i>RUNX1-GART</i>   | in-frame                | <i>RUNX1</i>   | ENSG00000159216 | 21 | q22.12 | <i>GART</i>    | ENSG00000159131 | 21 | q22.11 |
| C83 | <i>ETV6-RUNX1</i>   | in-frame                | <i>ETV6</i>    | ENSG00000139083 | 12 | p13.2  | <i>RUNX1</i>   | ENSG00000159216 | 21 | q22.12 |
| C83 | <i>RUNX1-ETV6</i>   | in-frame                | <i>RUNX1</i>   | ENSG00000159216 | 21 | q22.12 | <i>ETV6</i>    | ENSG00000139083 | 12 | p13.2  |
| C84 | <i>AFF1-MLL</i>     | UTR/CDS(truncated)      | <i>AFF1</i>    | ENSG00000172493 | 4  | q21.3  | <i>MLL</i>     | ENSG00000118058 | 11 | q23.3  |
| C84 | <i>MLL-AFF1</i>     | in-frame                | <i>MLL</i>     | ENSG00000118058 | 11 | q23.3  | <i>AFF1</i>    | ENSG00000172493 | 4  | q22.1  |
| C84 | <i>AFF1-MLL</i>     | in-frame                | <i>AFF1</i>    | ENSG00000172493 | 4  | q21.3  | <i>MLL</i>     | ENSG00000118058 | 11 | q23.3  |
| C85 | <i>MLL-MLLTI</i>    | in-frame                | <i>MLL</i>     | ENSG00000118058 | 11 | q23.3  | <i>MLLTI</i>   | ENSG00000130382 | 19 | p13.3  |
| C87 | <i>TCF3-PBX1</i>    | in-frame                | <i>TCF3</i>    | ENSG00000071564 | 19 | p13.3  | <i>PBX1</i>    | ENSG00000185630 | 1  | q23.3  |
| C88 | <i>ABL1-BCR</i>     | in-frame                | <i>ABL1</i>    | ENSG00000097007 | 9  | q34.12 | <i>BCR</i>     | ENSG00000186716 | 22 | q11.23 |
| C88 | <i>BCR-ABL1</i>     | in-frame                | <i>BCR</i>     | ENSG00000186716 | 22 | q11.23 | <i>ABL1</i>    | ENSG00000097007 | 9  | q34.12 |
| C88 | <i>HINT2-NPR2</i>   | in-frame                | <i>HINT2</i>   | ENSG00000137133 | 9  | p13.3  | <i>NPR2</i>    | ENSG00000159899 | 9  | p13.3  |
| C90 | <i>ZNF384-EP300</i> | UTR/CDS(truncated)      | <i>ZNF384</i>  | ENSG00000126746 | 12 | p13.31 | <i>EP300</i>   | ENSG00000100393 | 22 | q13.2  |
| C90 | <i>EP300-ZNF384</i> | in-frame                | <i>EP300</i>   | ENSG00000100393 | 22 | q13.2  | <i>ZNF384</i>  | ENSG00000126746 | 12 | p13.31 |
| C91 | <i>TCF3-PBX1</i>    | in-frame                | <i>TCF3</i>    | ENSG00000071564 | 19 | p13.3  | <i>PBX1</i>    | ENSG00000185630 | 1  | q23.3  |
| C93 | <i>MEF2D-SS18</i>   | out-of-frame            | <i>MEF2D</i>   | ENSG00000116604 | 1  | q22    | <i>SS18</i>    | ENSG00000141380 | 18 | q11.2  |
| C93 | <i>SS18-MEF2D</i>   | in-frame                | <i>SS18</i>    | ENSG00000141380 | 18 | q11.2  | <i>MEF2D</i>   | ENSG00000116604 | 1  | q22    |
| C93 | <i>FXR1-TBL1XR1</i> | CDS(truncated)/UTR      | <i>FXR1</i>    | ENSG00000114416 | 3  | q26.33 | <i>TBL1XR1</i> | ENSG00000177565 | 3  | q26.32 |
| C93 | <i>FXR1-TBL1XR1</i> | CDS(truncated)/intronic | <i>FXR1</i>    | ENSG00000114416 | 3  | q26.33 | <i>TBL1XR1</i> | ENSG00000177565 | 3  | q26.32 |
| C93 | <i>TBL1XR1-FXR1</i> | UTR/CDS(truncated)      | <i>TBL1XR1</i> | ENSG00000177565 | 3  | q26.32 | <i>FXR1</i>    | ENSG00000114416 | 3  | q26.33 |
| C93 | <i>MEF2D-SS18</i>   | in-frame                | <i>MEF2D</i>   | ENSG00000116604 | 1  | q22    | <i>SS18</i>    | ENSG00000141380 | 18 | q11.2  |
| C94 | <i>CTDP1-PQLC1</i>  | in-frame                | <i>CTDP1</i>   | ENSG00000060069 | 18 | q23    | <i>PQLC1</i>   | ENSG00000122490 | 18 | q23    |
| C94 | <i>PQLC1-CTDP1</i>  | in-frame                | <i>PQLC1</i>   | ENSG00000122490 | 18 | q23    | <i>CTDP1</i>   | ENSG00000060069 | 18 | q23    |
| C94 | <i>PIM3-METRNL</i>  | in-frame                | <i>PIM3</i>    | ENSG00000198355 | 22 | q13.33 | <i>METRNL</i>  | ENSG00000176845 | 17 | q25.3  |
| C94 | <i>PIM3-SLC7A5</i>  | in-frame                | <i>PIM3</i>    | ENSG00000198355 | 22 | q13.33 | <i>SLC7A5</i>  | ENSG00000103257 | 16 | q24.2  |
| C94 | <i>EWSR1-ZNF384</i> | in-frame                | <i>EWSR1</i>   | ENSG00000182944 | 22 | q12.2  | <i>ZNF384</i>  | ENSG00000126746 | 12 | p13.31 |
| C94 | <i>ZNF384-EWSR1</i> | UTR/CDS(truncated)      | <i>ZNF384</i>  | ENSG00000126746 | 12 | p13.31 | <i>EWSR1</i>   | ENSG00000182944 | 22 | q12.2  |
| C94 | <i>CD81-SLC7A5</i>  | out-of-frame            | <i>CD81</i>    | ENSG00000110651 | 11 | p15.5  | <i>SLC7A5</i>  | ENSG00000103257 | 16 | q24.2  |
| C95 | <i>ETV6-RUNX1</i>   | in-frame                | <i>ETV6</i>    | ENSG00000139083 | 12 | p13.2  | <i>RUNX1</i>   | ENSG00000159216 | 21 | q22.12 |
| C95 | <i>RUNX1-ETV6</i>   | in-frame                | <i>RUNX1</i>   | ENSG00000159216 | 21 | q22.12 | <i>ETV6</i>    | ENSG00000139083 | 12 | p13.2  |
| C97 | <i>RUNX1-ETV6</i>   | in-frame                | <i>RUNX1</i>   | ENSG00000159216 | 21 | q22.12 | <i>ETV6</i>    | ENSG00000139083 | 12 | p13.2  |
| C97 | <i>ETV6-RUNX1</i>   | in-frame                | <i>ETV6</i>    | ENSG00000139083 | 12 | p13.2  | <i>RUNX1</i>   | ENSG00000159216 | 21 | q22.12 |

|      |                      |              |              |                 |    |        |                |                 |    |        |
|------|----------------------|--------------|--------------|-----------------|----|--------|----------------|-----------------|----|--------|
| C102 | <i>PAX5-CBFA2T3</i>  | in-frame     | <i>PAX5</i>  | ENSG00000196092 | 9  | p13.2  | <i>CBFA2T3</i> | ENSG00000129993 | 16 | q24.3  |
| CA80 | <i>CEBPE-IGH</i>     | out-of-frame | <i>CEBPE</i> | ENSG00000092067 | 14 | q11.2  | <i>IGHM</i>    | ENSG00000211899 | 14 | q32.33 |
| CA92 | <i>ETV6-RUNX1</i>    | in-frame     | <i>ETV6</i>  | ENSG00000139083 | 12 | p13.2  | <i>RUNX1</i>   | ENSG00000159216 | 21 | q22.12 |
| CA92 | <i>RUNX1-ETV6</i>    | in-frame     | <i>RUNX1</i> | ENSG00000159216 | 21 | q22.12 | <i>ETV6</i>    | ENSG00000139083 | 12 | p13.2  |
| CA92 | <i>CTDPI-PQLC1</i>   | in-frame     | <i>CTDPI</i> | ENSG00000060069 | 18 | q23    | <i>PQLC1</i>   | ENSG00000122490 | 18 | q23    |
| CA92 | <i>PQLC1-CTDPI</i>   | in-frame     | <i>PQLC1</i> | ENSG00000122490 | 18 | q23    | <i>CTDPI</i>   | ENSG00000060069 | 18 | q23    |
| CA92 | <i>PRC1-KIF7</i>     | in-frame     | <i>PRC1</i>  | ENSG00000198901 | 15 | q26.1  | <i>KIF7</i>    | ENSG00000166813 | 15 | q26.1  |
| CA92 | <i>NOC4L-FBRSL1</i>  | in-frame     | <i>NOC4L</i> | ENSG00000184967 | 12 | q24.33 | <i>FBRSL1</i>  | ENSG00000112787 | 12 | q24.33 |
| CA92 | <i>ELF1-FOXO1</i>    | out-of-frame | <i>ELF1</i>  | ENSG00000120690 | 13 | q14.11 | <i>FOXO1</i>   | ENSG00000150907 | 13 | q14.11 |
| CA92 | <i>PIM3-BRD1</i>     | out-of-frame | <i>PIM3</i>  | ENSG00000198355 | 22 | q13.33 | <i>BRD1</i>    | ENSG00000100425 | 22 | q13.33 |
| CA92 | <i>POLE-FBRSL1</i>   | out-of-frame | <i>POLE</i>  | ENSG00000177084 | 12 | q24.33 | <i>FBRSL1</i>  | ENSG00000112787 | 12 | q24.33 |
| CA92 | <i>PTBP1-TMEM259</i> | in-frame     | <i>PTBP1</i> | ENSG00000011304 | 19 | p13.3  | <i>TMEM259</i> | ENSG00000182087 | 19 | p13.3  |
| CA97 | <i>EBF1-JAK2</i>     | in-frame     | <i>EBF1</i>  | ENSG00000164330 | 5  | q33.3  | <i>JAK2</i>    | ENSG00000096968 | 9  | p24.1  |
| CA97 | <i>JAK2-EBF1</i>     | in-frame     | <i>JAK2</i>  | ENSG00000096968 | 9  | p24.1  | <i>EBF1</i>    | ENSG00000164330 | 5  | q33.3  |

**Table S6. Information of newly identified in-frame and out-of-frame fusions by RNA-seq in 172 patients**

| Sample ID | Fusion genes        | Frame_info   | 5' gene        |                 |            |          |            |      | 3' gene       |                 |            |          |            |      |
|-----------|---------------------|--------------|----------------|-----------------|------------|----------|------------|------|---------------|-----------------|------------|----------|------------|------|
|           |                     |              | Gene           | Accession       | Chromosome | Cytoband | Breakpoint | Exon | Gene          | Accession       | Chromosome | Cytoband | Breakpoint | Exon |
| A03       | <i>EMILIN2-PAX5</i> | in-frame     | <i>EMILIN2</i> | ENSG00000132205 | 18         | p11.31   | 2907083    | 5    | <i>PAX5</i>   | ENSG00000196092 | 9          | p13.2    | 36966721   | 6    |
| A05       | <i>RBI-WDFY2</i>    | out-of-frame | <i>RBI</i>     | ENSG00000139687 | 13         | q14.2    | 48955579   | 17   | <i>WDFY2</i>  | ENSG00000139668 | 13         | q14.3    | 52301814   | 6    |
| A05       | <i>RBI-WDFY2</i>    | out-of-frame | <i>RBI</i>     | ENSG00000139687 | 13         | q14.2    | 48955579   | 17   | <i>WDFY2</i>  | ENSG00000139668 | 13         | q14.3    | 52313185   | 7    |
| A19       | <i>PAX5-MLLT3</i>   | in-frame     | <i>PAX5</i>    | ENSG00000196092 | 9          | p13.2    | 36966546   | 6    | <i>MLLT3</i>  | ENSG00000171843 | 9          | p21.3    | 20620833   | 2    |
| A20       | <i>EP300-ZNF384</i> | in-frame     | <i>EP300</i>   | ENSG00000100393 | 22         | q13.2    | 41527637   | 6    | <i>ZNF384</i> | ENSG00000126746 | 12         | p13.31   | 6797392    | 2    |
| A21       | <i>NDUFA4-SCIN</i>  | in-frame     | <i>NDUFA4</i>  | ENSG00000189043 | 7          | p21.3    | 10979643   | 1    | <i>SCIN</i>   | ENSG00000006747 | 7          | p21.3    | 12689092   | 14   |
| A36       | <i>EP300-ZNF384</i> | in-frame     | <i>EP300</i>   | ENSG00000100393 | 22         | q13.2    | 41527637   | 6    | <i>ZNF384</i> | ENSG00000126746 | 12         | p13.31   | 6788691    | 3    |
| A37       | <i>EP300-ZNF384</i> | in-frame     | <i>EP300</i>   | ENSG00000100393 | 22         | q13.2    | 41527637   | 6    | <i>ZNF384</i> | ENSG00000126746 | 12         | p13.31   | 6788691    | 3    |
| A37       | <i>EP300-ZNF384</i> | in-frame     | <i>EP300</i>   | ENSG00000100393 | 22         | q13.2    | 41527637   | 6    | <i>ZNF384</i> | ENSG00000126746 | 12         | p13.31   | 6797392    | 2    |
| A41       | <i>MEF2D-BCL9</i>   | in-frame     | <i>MEF2D</i>   | ENSG00000116604 | 1          | q22      | 156449082  | 6    | <i>BCL9</i>   | ENSG00000116128 | 1          | q21.2    | 147095643  | 10   |
| A41       | <i>MEF2D-BCL9</i>   | in-frame     | <i>MEF2D</i>   | ENSG00000116604 | 1          | q22      | 156449082  | 6    | <i>BCL9</i>   | ENSG00000116128 | 1          | q21.2    | 147095679  | 10   |
| A41       | <i>MEF2D-BCL9</i>   | in-frame     | <i>MEF2D</i>   | ENSG00000116604 | 1          | q22      | 156449082  | 6    | <i>BCL9</i>   | ENSG00000116128 | 1          | q21.2    | 147096129  | 10   |

|     |                              |              |                |                 |    |        |           |    |                 |                 |    |        |           |    |
|-----|------------------------------|--------------|----------------|-----------------|----|--------|-----------|----|-----------------|-----------------|----|--------|-----------|----|
| A41 | <i>RFWD2-TNFSF18</i>         | in-frame     | <i>RFWD2</i>   | ENSG00000143207 | 1  | q25.2  | 176012322 | 14 | <i>TNFSF18</i>  | ENSG00000120337 | 1  | q25.1  | 173020053 | 1  |
| A43 | <i>EP300-ZNF384</i>          | in-frame     | <i>EP300</i>   | ENSG00000100393 | 22 | q13.2  | 41527637  | 6  | <i>ZNF384</i>   | ENSG00000126746 | 12 | p13.31 | 6788691   | 3  |
| A47 | <i>CREBBP-ZNF384</i>         | in-frame     | <i>CREBBP</i>  | ENSG00000005339 | 16 | p13.3  | 3832685   | 6  | <i>ZNF384</i>   | ENSG00000126746 | 12 | p13.31 | 6788691   | 3  |
| A47 | <i>CREBBP-ZNF384</i>         | in-frame     | <i>CREBBP</i>  | ENSG00000005339 | 16 | p13.3  | 3843387   | 4  | <i>ZNF384</i>   | ENSG00000126746 | 12 | p13.31 | 6788691   | 3  |
| A59 | <i>PRRC2B-BCR</i>            | in-frame     | <i>PRRC2B</i>  | ENSG00000130723 | 9  | q34.13 | 134346370 | 13 | <i>BCR</i>      | ENSG00000186716 | 22 | q11.23 | 23595986  | 2  |
| A73 | <i>EP300-ZNF384</i>          | in-frame     | <i>EP300</i>   | ENSG00000100393 | 22 | q13.2  | 41527637  | 6  | <i>ZNF384</i>   | ENSG00000126746 | 12 | p13.31 | 6788691   | 3  |
| A75 | <i>MEF2D-HNRNPUL1</i>        | in-frame     | <i>MEF2D</i>   | ENSG00000116604 | 1  | q22    | 156444900 | 9  | <i>HNRNPUL1</i> | ENSG00000105323 | 19 | q13.2  | 41808570  | 12 |
| A77 | <i>PALM-NCLN</i>             | in-frame     | <i>PALM</i>    | ENSG00000099864 | 19 | p13.3  | 736078    | 7  | <i>NCLN</i>     | ENSG00000125912 | 19 | p13.3  | 3192468   | 2  |
| A82 | <i>SLC12A7-NKD2</i>          | in-frame     | <i>SLC12A7</i> | ENSG00000113504 | 5  | p15.33 | 1093648   | 3  | <i>NKD2</i>     | ENSG00000145506 | 5  | p15.33 | 1032267   | 4  |
| A82 | <i>MF12-TNK2</i>             | out-of-frame | <i>MF12</i>    | ENSG00000163975 | 3  | q29    | 196756525 | 1  | <i>TNK2</i>     | ENSG00000061938 | 3  | q29    | 195599341 | 10 |
| A82 | <i>FGFRL1-CTBP1</i>          | in-frame     | <i>FGFRL1</i>  | ENSG00000127418 | 4  | p16.3  | 1006352   | 1  | <i>CTBP1</i>    | ENSG00000159692 | 4  | p16.3  | 1219354   | 5  |
| A82 | <i>MF12-FYTTD1</i>           | in-frame     | <i>MF12</i>    | ENSG00000163975 | 3  | q29    | 196756525 | 1  | <i>FYTTD1</i>   | ENSG00000122068 | 3  | q29    | 197483297 | 2  |
| A86 | <i>ING4-C17ORF50</i>         | in-frame     | <i>ING4</i>    | ENSG00000111653 | 12 | p13.31 | 6761828   | 5  | <i>C17ORF50</i> | ENSG00000270806 | 17 | q12    | 34091026  | 2  |
| A88 | <i>UQCRC1-ANO10</i>          | out-of-frame | <i>UQCRC1</i>  | ENSG00000010256 | 3  | p21.31 | 48640997  | 6  | <i>ANO10</i>    | ENSG00000160746 | 3  | p22.1  | 43474219  | 12 |
| A89 | <i>JAK2-SNX29</i>            | in-frame     | <i>JAK2</i>    | ENSG00000096968 | 9  | p24.1  | 5070052   | 12 | <i>SNX29</i>    | ENSG00000048471 | 16 | p13.13 | 12571576  | 19 |
| A89 | <i>SNX29-JAK2</i>            | in-frame     | <i>SNX29</i>   | ENSG00000048471 | 16 | p13.13 | 12497386  | 18 | <i>JAK2</i>     | ENSG00000096968 | 9  | p24.1  | 5072492   | 13 |
| A91 | <i>UBAP1-DCAF12</i>          | out-of-frame | <i>UBAP1</i>   | ENSG00000165006 | 9  | p13.3  | 34179238  | 1  | <i>DCAF12</i>   | ENSG00000198876 | 9  | p13.3  | 34107563  | 3  |
| B12 | <i>MEF2D-BCL9</i>            | in-frame     | <i>MEF2D</i>   | ENSG00000116604 | 1  | q22    | 156449378 | 5  | <i>BCL9</i>     | ENSG00000116128 | 1  | q21.2  | 147094072 | 9  |
| C08 | <i>MEF2D-HNRNPUL1</i>        | in-frame     | <i>MEF2D</i>   | ENSG00000116604 | 1  | q22    | 156449082 | 6  | <i>HNRNPUL1</i> | ENSG00000105323 | 19 | q13.2  | 41808570  | 12 |
| C27 | <i>ACINI-NUTM1</i>           | in-frame     | <i>ACINI</i>   | ENSG00000100813 | 14 | q11.2  | 23550957  | 5  | <i>NUTM1</i>    | ENSG00000184507 | 15 | q14    | 34638143  | 2  |
| C30 | <i>MEF2D-BCL9</i>            | in-frame     | <i>MEF2D</i>   | ENSG00000116604 | 1  | q22    | 156449082 | 6  | <i>BCL9</i>     | ENSG00000116128 | 1  | q21.2  | 147094072 | 9  |
| C30 | <i>DCAF8-DNM3</i>            | out-of-frame | <i>DCAF8</i>   | ENSG00000132716 | 1  | q23.2  | 160195381 | 8  | <i>DNM3</i>     | ENSG00000197959 | 1  | q24.3  | 171956796 | 3  |
| C37 | <i>EP300-ZNF384</i>          | in-frame     | <i>EP300</i>   | ENSG00000100393 | 22 | q13.2  | 41527637  | 6  | <i>ZNF384</i>   | ENSG00000126746 | 12 | p13.31 | 6788691   | 3  |
| C40 | <i>TSC2-ATP6V0C</i>          | out-of-frame | <i>TSC2</i>    | ENSG00000103197 | 16 | p13.3  | 2107179   | 9  | <i>ATP6V0C</i>  | ENSG00000185883 | 16 | p13.3  | 2569219   | 2  |
| C41 | <i>SMARCA2-ZNF362</i>        | in-frame     | <i>SMARCA2</i> | ENSG00000080503 | 9  | p24.3  | 2039900   | 4  | <i>ZNF362</i>   | ENSG00000160094 | 1  | p35.1  | 33745725  | 5  |
| C41 | <i>ZNF362-SMARCA2</i>        | in-frame     | <i>ZNF362</i>  | ENSG00000160094 | 1  | p35.1  | 33742195  | 4  | <i>SMARCA2</i>  | ENSG00000080503 | 9  | p24.3  | 2047229   | 5  |
| C44 | <i>HNRNPU-ZBTB18</i>         | in-frame     | <i>HNRNPU</i>  | ENSG00000153187 | 1  | q44    | 245026976 | 1  | <i>ZBTB18</i>   | ENSG00000179456 | 1  | q44    | 244217090 | 2  |
| C45 | <i>CSNK1D-METRNL</i>         | out-of-frame | <i>CSNK1D</i>  | ENSG00000141551 | 17 | q25.3  | 80231182  | 1  | <i>METRNL</i>   | ENSG00000176845 | 17 | q25.3  | 81042814  | 2  |
| C45 | <i>MBP-TGIF1</i>             | in-frame     | <i>MBP</i>     | ENSG00000197971 | 18 | q23    | 74778254  | 3  | <i>TGIF1</i>    | ENSG00000177426 | 18 | p11.31 | 3456352   | 2  |
| C57 | <i>RTN3-STIP1</i>            | out-of-frame | <i>RTN3</i>    | ENSG00000133318 | 11 | q13.1  | 63449250  | 1  | <i>STIP1</i>    | ENSG00000168439 | 11 | q13.1  | 63960550  | 2  |
| C64 | <i>WDR4-PDE9A</i>            | out-of-frame | <i>WDR4</i>    | ENSG00000160193 | 21 | q22.3  | 44296812  | 2  | <i>PDE9A</i>    | ENSG00000160191 | 21 | q22.3  | 44189137  | 17 |
| C64 | <i>SMARCC1-<br/>CDK5RAP3</i> | out-of-frame | <i>SMARCC1</i> | ENSG00000173473 | 3  | p21.31 | 47770515  | 6  | <i>CDK5RAP3</i> | ENSG00000108465 | 17 | q21.32 | 46047979  | 1  |

|      |                      |              |              |                 |    |        |           |   |                |                 |    |        |           |    |
|------|----------------------|--------------|--------------|-----------------|----|--------|-----------|---|----------------|-----------------|----|--------|-----------|----|
| C64  | <i>WDR4-PDE9A</i>    | out-of-frame | WDR4         | ENSG00000160193 | 21 | q22.3  | 44296812  | 2 | PDE9A          | ENSG00000160191 | 21 | q22.3  | 44188298  | 16 |
| C66  | <i>CD74-PDGFRB</i>   | in-frame     | CD74         | ENSG00000019582 | 5  | q32    | 149784243 | 6 | PDGFRB         | ENSG00000113721 | 5  | q32    | 149506177 | 11 |
| C67  | <i>KDM4B-CUL2</i>    | in-frame     | KDM4B        | ENSG00000127663 | 19 | p13.3  | 5047680   | 6 | CUL2           | ENSG00000108094 | 10 | p11.21 | 35360267  | 2  |
| C69  | <i>UBA2-PPP1R36</i>  | in-frame     | UBA2         | ENSG00000126261 | 19 | q13.11 | 34929671  | 6 | PPP1R36        | ENSG00000165807 | 14 | q23.3  | 65031469  | 4  |
| C69  | <i>UBA2-PPP1R36</i>  | in-frame     | UBA2         | ENSG00000126261 | 19 | q13.11 | 34929671  | 6 | PPP1R36        | ENSG00000165807 | 14 | q23.3  | 65019532  | 3  |
| C69  | <i>CDK1-DGKH</i>     | in-frame     | CDK1         | ENSG00000170312 | 10 | q21.2  | 62545545  | 4 | DGKH           | ENSG00000102780 | 13 | q14.11 | 42803235  | 30 |
| C82  | <i>RUNX1-GART</i>    | in-frame     | RUNX1        | ENSG00000159216 | 21 | q22.12 | 36421139  | 2 | GART           | ENSG00000159131 | 21 | q22.11 | 34911629  | 2  |
| C82  | <i>RUNX1-GART</i>    | in-frame     | RUNX1        | ENSG00000159216 | 21 | q22.12 | 36421139  | 2 | GART           | ENSG00000159131 | 21 | q22.11 | 34907626  | 3  |
| C82  | <i>RUNX1-GART</i>    | in-frame     | RUNX1        | ENSG00000159216 | 21 | q22.12 | 36421139  | 2 | GART           | ENSG00000159131 | 21 | q22.11 | 34911662  | 2  |
| C88  | <i>HINT2-NPR2</i>    | in-frame     | HINT2        | ENSG00000137133 | 9  | p13.3  | 35814896  | 1 | NPR2           | ENSG00000159899 | 9  | p13.3  | 35805508  | 13 |
| C93  | <i>MEF2D-SS18</i>    | in-frame     | MEF2D        | ENSG00000116604 | 1  | q22    | 156444900 | 9 | SS18           | ENSG00000141380 | 18 | q11.2  | 23619420  | 6  |
| C93  | <i>SS18-MEF2D</i>    | in-frame     | SS18         | ENSG00000141380 | 18 | q11.2  | 23632588  | 5 | MEF2D          | ENSG00000116604 | 1  | q22    | 156438812 | 10 |
| C94  | <i>CD81-SLC7A5</i>   | out-of-frame | CD81         | ENSG00000110651 | 11 | p15.5  | 2398845   | 1 | SLC7A5         | ENSG00000103257 | 16 | q24.2  | 87874761  | 3  |
| C102 | <i>PAX5-CBFA2T3</i>  | in-frame     | PAX5         | ENSG00000196092 | 9  | p13.2  | 37002645  | 5 | CBFA2T3        | ENSG00000129993 | 16 | q24.3  | 88968064  | 2  |
| CA92 | <i>PRC1-KIF7</i>     | in-frame     | <i>PRC1</i>  | ENSG00000198901 | 15 | q26.1  | 91522388  | 8 | <i>KIF7</i>    | ENSG00000166813 | 15 | q26.1  | 90177114  | 12 |
| CA92 | <i>POLE-FBRS1</i>    | out-of-frame | <i>POLE</i>  | ENSG00000177084 | 12 | q24.33 | 133263840 | 1 | <i>FBRS1</i>   | ENSG00000112787 | 12 | q24.33 | 133084739 | 2  |
| CA92 | <i>PTBP1-TMEM259</i> | in-frame     | <i>PTBP1</i> | ENSG00000011304 | 19 | p13.3  | 799443    | 2 | <i>TMEM259</i> | ENSG00000182087 | 19 | p13.3  | 1014472   | 2  |

**Table S7. Characteristics of patients with *ZNF384* and *MEF2D* related fusions identified by RNA-seq and RT-PCR**

\*Last follow up date: 2015/12/3

| Related gene  | ID   | Age (yr) | Fusion              | WBC ( $\times 10^9/L$ ) | Karyotype                          | Concurrent key fusion | Immunophenotype | CD13 | CD33 | Death* (0=no, 1=yes) | Relapse* (0=no, 1=yes) |
|---------------|------|----------|---------------------|-------------------------|------------------------------------|-----------------------|-----------------|------|------|----------------------|------------------------|
| <i>ZNF384</i> | A20  | 44.3     | <i>EP300-ZNF384</i> | 46.4                    | 46,XY                              | no                    | Common-B        | +    | +    | 0                    | 0                      |
|               | A36  | 23.7     | <i>EP300-ZNF384</i> | 13                      | 46,XY                              | no                    | Common-B        | -    | +    | 0                    | 0                      |
|               | A37  | 22.8     | <i>EP300-ZNF384</i> | 10.34                   | 46-47,XX,+M[CP3][3]/46,XX[17]/[20] | no                    | Pro-B           | +    | +    | 0                    | 0                      |
|               | A43  | 30.4     | <i>EP300-ZNF384</i> | 3.8                     | 46,XX                              | no                    | Common-B        | -    | +    | 0                    | 0                      |
|               | A73  | 18.6     | <i>EP300-ZNF384</i> | 12.29                   | NA                                 | no                    | Pro-B           | +    | -    | 0                    | 0                      |
|               | A83  | 18.2     | <i>EP300-ZNF384</i> | 77.98                   | 46,XY                              | no                    | Pro-B           | +    | +    | 0                    | 0                      |
|               | F305 | 23.0     | <i>EP300-ZNF384</i> | 11.5                    | 46,XY                              | no                    | Pro-B           | +    | +    | 0                    | 0                      |
|               | F328 | 56.3     | <i>EP300-ZNF384</i> | 4.6                     | 46,XX                              | no                    | Pro-B           | +    | +    | 1                    | 0                      |

|              |      |      |                       |       |                                                                                                                                                   |                 |          |    |    |    |    |
|--------------|------|------|-----------------------|-------|---------------------------------------------------------------------------------------------------------------------------------------------------|-----------------|----------|----|----|----|----|
|              | F345 | 19.7 | <i>EP300-ZNF384</i>   | 2.23  | Fail                                                                                                                                              | no              | Pro-B    | +  | +  | NA | NA |
|              | C37  | 13.8 | <i>EP300-ZNF384</i>   | 64.8  | 46,XX, der(1)t(1;14)(q12;q12),-4,+mar[6]/46,XX [6]                                                                                                | no              | Pro-B    | -  | -  | 0  | 0  |
|              | C47  | 4.1  | <i>EP300-ZNF384</i>   | 96    | 46,XY                                                                                                                                             | no              | Pro-B    | -  | +  | 0  | 0  |
|              | C90  | 5.0  | <i>EP300-ZNF384</i>   | 6.2   | 46,XY,inv(9)(p12;q13)[10]/49,idem,-Y,+8,+13,+20,+22[10]                                                                                           | no              | Pro-B    | -  | +  | 0  | 0  |
|              | F038 | 14.6 | <i>EP300-ZNF384</i>   | 36.8  | 46,XX                                                                                                                                             | no              | Pro-B    | NA | NA | 1  | 1  |
|              | F176 | 7.3  | <i>EP300-ZNF384</i>   | 46    | 46,XY                                                                                                                                             | no              | Pro-B    | NA | NA | 0  | 0  |
|              | A86  | 24.8 | <i>TAF15-ZNF384</i>   | 27.11 | 43-46, XX,12p+[cp4]/44-45,XX,6q-,12p+[cp3]/46,XX[5]/[18]                                                                                          | no              | Pro-B    | +  | +  | 0  | 0  |
|              | F308 | 33.3 | <i>TAF15-ZNF384</i>   | 9.4   | 46,XX                                                                                                                                             | no              | Pro-B    | +  | +  | 1  | 1  |
|              | A35  | 18.6 | <i>EWSR1-ZNF384</i>   | 4.3   | 46,XY[6]/[12], 6q- and M chromosome occasionally seen                                                                                             | no              | Pro-B    | +  | +  | 0  | 0  |
|              | C94  | 3.0  | <i>EWSR1-ZNF384</i>   | 3.6   | 46,XX ,t(12;22)(p13;q13),i(13)(q10)/46,XX                                                                                                         | no              | Common-B | -  | -  | 0  | 0  |
|              | C01  | 2.3  | <i>TCF3-ZNF384</i>    | 104   | 46,XX                                                                                                                                             | no              | Pro-B    | -  | +  | 0  | 1  |
|              | C80  | 2.2  | <i>TCF3-ZNF384</i>    | 35.1  | 46,XY                                                                                                                                             | no              | Pro-B    | -  | +  | 0  | 1  |
|              | A47  | 38.5 | <i>CREBBP-ZNF384</i>  | 56.59 | Fail                                                                                                                                              | no              | Pro-B    | +  | +  | 1  | 1  |
| <i>MEF2D</i> | A41  | 59.1 | <i>MEF2D-BCL9</i>     | 58.3  | 47-48,XX,-4,-6,+M1-M5[CP3]/[4]                                                                                                                    | no              | Common-B | -  | +  | 1  | 0  |
|              | F006 | 33.2 | <i>MEF2D-BCL9</i>     | 4.9   | 44-47,XY,+7,+8,-20[2]/46,XX[1]/[9]                                                                                                                | no              | Pre-B    | NA | NA | 1  | 1  |
|              | F279 | 22.8 | <i>MEF2D-BCL9</i>     | 18.25 | Fail                                                                                                                                              | no              | Pre-B    | NA | NA | 1  | 1  |
|              | F339 | 55.1 | <i>MEF2D-BCL9</i>     | 10.93 | Fail                                                                                                                                              | no              | Pre-B    | -  | -  | 0  | 0  |
|              | F348 | 19.3 | <i>MEF2D-BCL9</i>     | 203.7 | 46,XX                                                                                                                                             | no              | Pre-B    | -  | -  | 0  | 0  |
|              | F039 | 15.6 | <i>MEF2D-BCL9</i>     | 7.1   | 43-46,XX,2p-,9,i(17q)[CP11]/46,XX[4]/[18]                                                                                                         | no              | Pre-B    | NA | NA | 1  | 1  |
|              | B12  | 4.7  | <i>MEF2D-BCL9</i>     | 20.9  | 46,XY                                                                                                                                             | no              | Pre-B    | -  | -  | 1  | 1  |
|              | C30  | 12.9 | <i>MEF2D-BCL9</i>     | 10.3  | 44-46,X,-4,-5,-8,+M4-M5/46,XY                                                                                                                     | no              | Pre-B    | -  | -  | 0  | 0  |
|              | A75  | 28.0 | <i>MEF2D-HNRNPUL1</i> | 11.97 | NA                                                                                                                                                | no              | Pre-B    | -  | +  | 0  | 0  |
|              | F014 | 34.4 | <i>MEF2D-HNRNPUL1</i> | 2.2   | Fail                                                                                                                                              | no              | Pre-B    | NA | NA | 1  | 1  |
|              | F041 | 37.0 | <i>MEF2D-HNRNPUL1</i> | 4.9   | Fail                                                                                                                                              | no              | Pre-B    | -  | -  | 1  | 1  |
|              | F280 | 33.3 | <i>MEF2D-HNRNPUL1</i> | 7     | Fail                                                                                                                                              | no              | Pre-B    | -  | -  | 0  | 0  |
|              | F304 | 56.5 | <i>MEF2D-HNRNPUL1</i> | 16.2  | 46;XY;9q+[1]/46;XY[2]/[8]                                                                                                                         | no              | Pre-B    | -  | -  | 0  | 0  |
|              | C08  | 15.1 | <i>MEF2D-HNRNPUL1</i> | 6.82  | 46,XX                                                                                                                                             | no              | Pre-B    | -  | +  | 1  | 1  |
|              | F158 | 12.1 | <i>MEF2D-HNRNPUL1</i> | 49.5  | 46,XY,-5,add(9)(p22),-17,+2M                                                                                                                      | <i>BCR-ABL1</i> | Pre-B    | NA | NA | 1  | 1  |
|              | F177 | 9.0  | <i>MEF2D-HNRNPUL1</i> | 6     | 47,XX,+8[2]/46,XX,+8,-19[2]/[9]                                                                                                                   | no              | NA       | NA | NA | 0  | 0  |
|              | F013 | 27.4 | <i>MEF2D-SS18</i>     | 28.1  | 42-47,XY,1q-,+M1-M2[cp8]/46,XY[1]/[9]                                                                                                             | no              | Pre-B    | -  | -  | 0  | 0  |
|              | C93  | 4.9  | <i>MEF2D-SS18</i>     | 11    | 46,XX,+X,t(1;18)(q21;q11.2),del(9)(p22),der(9,10)(q10;q10)<br>[15]/45,XX,t(1;18)(q21;q11.2),t(2;5)(q37;q13),der(9)(p22),<br>der(9;11)(q10;q10)[5] | no              | Pre-B    | -  | -  | 0  | 0  |



**Table S8. Presenting clinical characteristics and outcome of patients with two *MEF2D* and *ZNF384* fusions**

\*12 patients with available data were included in survival analysis.

|                                                            | <i>MEF2D</i> fusions |                 | <i>ZNF384</i> fusions |                 |
|------------------------------------------------------------|----------------------|-----------------|-----------------------|-----------------|
|                                                            | Adult                | Pediatric       | Adult                 | Pediatric       |
| <b>Number</b>                                              | 12                   | 7               | 13                    | 8               |
| <b>Age at diagnosis (year)</b>                             |                      |                 |                       |                 |
| Median                                                     | 33.25                | 12.1            | 23.7                  | 4.55            |
| Range                                                      | 19.3-59.1            | 4.7-15.6        | 18.2-56.3             | 2.2-14.6        |
| <b>Gender, no. (%)</b>                                     |                      |                 |                       |                 |
| Male                                                       | 6(50.0%)             | 3(42.9%)        | 6(46.2%)              | 4(50.0%)        |
| Female                                                     | 6(50.0%)             | 4(57.1%)        | 7(53.8%)              | 4(50.0%)        |
| <b>WBC count at diagnosis (<math>\times 10^9/L</math>)</b> |                      |                 |                       |                 |
| Median                                                     | 13                   | 10.3            | 11.5                  | 41.4            |
| Range                                                      | 2.2-203.7            | 6.0-49.5        | 2.23-77.98            | 3.6-104.0       |
| <b>% 5-year survival (<math>\pm</math>SE)</b>              | 15.6 $\pm$ 14.2      | 33.3 $\pm$ 19.2 | 38.6 $\pm$ 28.2*      | 75.0 $\pm$ 21.7 |

**Table S9. Top 864 genes used for unsupervised clustering**

|               |                |                |                 |                |                 |               |                  |                 |               |                 |                 |               |                 |                 |
|---------------|----------------|----------------|-----------------|----------------|-----------------|---------------|------------------|-----------------|---------------|-----------------|-----------------|---------------|-----------------|-----------------|
| <i>FSCN1</i>  | <i>KCNK12</i>  | <i>PEAR1</i>   | <i>CDC42BPB</i> | <i>C3orf56</i> | <i>NGFR</i>     | <i>PTPRK</i>  | <i>PSD2</i>      | <i>MPPED2</i>   | <i>IL8</i>    | <i>AQP9</i>     | <i>CD248</i>    | <i>RORB</i>   | <i>COL27A1</i>  | <i>NXN</i>      |
| <i>CD109</i>  | <i>NRXN2</i>   | <i>NRXN3</i>   | <i>CAMSAP2</i>  | <i>MARCKS</i>  | <i>PLCH1</i>    | <i>PTPRB</i>  | <i>KIAA1324L</i> | <i>TGFA</i>     | <i>CXCL2</i>  | <i>SERPINB2</i> | <i>VWA1</i>     | <i>CRYM</i>   | <i>GPR125</i>   | <i>ADAM33</i>   |
| <i>ECM1</i>   | <i>CRLF2</i>   | <i>PCLO</i>    | <i>HS6ST2</i>   | <i>LPCAT2</i>  | <i>EPHA7</i>    | <i>BEST3</i>  | <i>ITGA9</i>     | <i>SPATA6</i>   | <i>CXCL3</i>  | <i>PTGS2</i>    | <i>LRRC38</i>   | <i>KCNJ12</i> | <i>PARD3</i>    | <i>DMD</i>      |
| <i>TSPAN7</i> | <i>LCN10</i>   | <i>BMP2</i>    | <i>STC2</i>     | <i>H2AFY2</i>  | <i>CREG2</i>    | <i>VWA5B2</i> | <i>HTRA3</i>     | <i>HOXA1</i>    | <i>SPG20</i>  | <i>G0S2</i>     | <i>WDR86</i>    | <i>SYNPO</i>  | <i>ARPP21</i>   | <i>FAM47A</i>   |
| <i>EMP1</i>   | <i>LCN6</i>    | <i>PRX</i>     | <i>ZNF462</i>   | <i>TSKS</i>    | <i>FAM69C</i>   | <i>NKAIN4</i> | <i>MDGA1</i>     | <i>HOXA2</i>    | <i>VNN1</i>   | <i>CYBB</i>     | <i>PRR15</i>    | <i>MYBPH</i>  | <i>RASAL2</i>   | <i>ANKRD30B</i> |
| <i>BAALC</i>  | <i>STK32B</i>  | <i>TMEM236</i> | <i>SNX7</i>     | <i>TRH</i>     | <i>C18orf63</i> | <i>CDH4</i>   | <i>TRDV2</i>     | <i>COL24A1</i>  | <i>CEBPA</i>  | <i>TLR7</i>     | <i>PAWR</i>     | <i>KIF12</i>  | <i>HMX2</i>     | <i>SOX11</i>    |
| <i>SOCS2</i>  | <i>BCL6B</i>   | <i>MYO1B</i>   | <i>PDGFA</i>    | <i>NLRP2</i>   | <i>CADPS</i>    | <i>RNF217</i> | <i>L3MBTL4</i>   | <i>PTPRM</i>    | <i>RPH3AL</i> | <i>CLECL1</i>   | <i>FERM1</i>    | <i>LAMA5</i>  | <i>IGHJ3P</i>   | <i>SORBS2</i>   |
| <i>NPRI</i>   | <i>PPP2R2C</i> | <i>DAB2</i>    | <i>SLITRK4</i>  | <i>RNF165</i>  | <i>CSF3R</i>    | <i>FBN2</i>   | <i>NMD3P1</i>    | <i>ARHGAP24</i> | <i>RGS16</i>  | <i>SPI1</i>     | <i>TPBG</i>     | <i>ITGA8</i>  | <i>IGHJ5</i>    | <i>VWC2</i>     |
| <i>CYGB</i>   | <i>COL5A1</i>  | <i>POU4F1</i>  | <i>BDKRB2</i>   | <i>ASB9</i>    | <i>ST3GAL6</i>  | <i>PID1</i>   | <i>ABHD12B</i>   | <i>CLEC12A</i>  | <i>CCNA1</i>  | <i>ROPNIL</i>   | <i>C1orf115</i> | <i>ASIC2</i>  | <i>IGHJ4</i>    | <i>ADAMS7</i>   |
| <i>CD34</i>   | <i>NOS2</i>    | <i>TSPAN15</i> | <i>ITPRIPL2</i> | <i>INHBB</i>   | <i>CLEC4E</i>   | <i>SLC8A3</i> | <i>NPTX1</i>     | <i>CLEC1B</i>   | <i>GATA3</i>  | <i>MS4A6A</i>   | <i>MF12</i>     | <i>SH3BP4</i> | <i>ARHGAP29</i> | <i>PRKCZ</i>    |

|                 |                 |                |                  |                 |                   |                 |                      |                 |                 |                 |                |                 |                   |                 |
|-----------------|-----------------|----------------|------------------|-----------------|-------------------|-----------------|----------------------|-----------------|-----------------|-----------------|----------------|-----------------|-------------------|-----------------|
| <i>S100A16</i>  | <i>TPO</i>      | <i>SYDE1</i>   | <i>NOV</i>       | <i>LY6H</i>     | <i>CEBPE</i>      | <i>ANO1</i>     | <i>XIST</i>          | <i>DCN</i>      | <i>NPR3</i>     | <i>TIFAB</i>    | <i>KCNK9</i>   | <i>LARP6</i>    | <i>ST6GALNAC3</i> | <i>FAM19A5</i>  |
| <i>GIPC3</i>    | <i>DPEP1</i>    | <i>FLT4</i>    | <i>PACSIN1</i>   | <i>HDGFRP3</i>  | <i>DACH1</i>      | <i>RAB6C</i>    | <i>GSTT1</i>         | <i>ADAMS9</i>   | <i>C1orf186</i> | <i>SLC12A3</i>  | <i>DFNA5</i>   | <i>LDLRAD3</i>  | <i>FAM19A1</i>    | <i>NUDT11</i>   |
| <i>ITGA6</i>    | <i>SMAD1</i>    | <i>GNG11</i>   | <i>ST14</i>      | <i>ARHGAP32</i> | <i>OR5E1P</i>     | <i>KCNJ16</i>   | <i>PRSS21</i>        | <i>PCDH17</i>   | <i>TDRD9</i>    | <i>RGS18</i>    | <i>MYO3A</i>   | <i>AR</i>       | <i>TSPYL5</i>     | <i>RHOBTB1</i>  |
| <i>UACA</i>     | <i>PLEKHG1</i>  | <i>FZD8</i>    | <i>SYNM</i>      | <i>ZNF667</i>   | <i>OR5P3</i>      | <i>CREB3L3</i>  | <i>PPAPDC3</i>       | <i>IGF2</i>     | <i>ATP9A</i>    | <i>TFEC</i>     | <i>IKZF3</i>   | <i>SEMA6D</i>   | <i>NETO1</i>      | <i>PKIA</i>     |
| <i>CCND2</i>    | <i>MARK2P11</i> | <i>STARD13</i> | <i>PON2</i>      | <i>TUSC1</i>    | <i>OR10AB1P</i>   | <i>PRKCG</i>    | <i>DKFZP434E1119</i> | <i>MAP3K5</i>   | <i>SALL4</i>    | <i>RAB44</i>    | <i>ABCB4</i>   | <i>PCBP3</i>    | <i>PTP4A3</i>     | <i>FAM110C</i>  |
| <i>NPDC1</i>    | <i>MMP17</i>    | <i>SPATS2L</i> | <i>PDK4</i>      | <i>IGFBP2</i>   | <i>OR5P1P</i>     | <i>BAMBI</i>    | <i>RPL41P1</i>       | <i>PTH1R</i>    | <i>CDH11</i>    | <i>SIGLEC12</i> | <i>ZAP70</i>   | <i>CSMD1</i>    | <i>ELFN1</i>      | <i>CDH2</i>     |
| <i>EGFL7</i>    | <i>ZBTB46</i>   | <i>THBS1</i>   | <i>CPVL</i>      | <i>ZNF135</i>   | <i>OR5P4P</i>     | <i>NTRK1</i>    | <i>RPS23P8</i>       | <i>PALLD</i>    | <i>TTC28</i>    | <i>VCAN</i>     | <i>FCRL1</i>   | <i>TCERG1L</i>  | <i>NRN1</i>       | <i>PLCB4</i>    |
| <i>MAMLD1</i>   | <i>TMPRSS15</i> | <i>ENPP2</i>   | <i>SH3BP5</i>    | <i>ZNF112</i>   | <i>CYB5R2</i>     | <i>BHLHE23</i>  | <i>MRNR2L9</i>       | <i>ANKRD27</i>  | <i>SPP1</i>     | <i>LGALS2</i>   | <i>MYEF2</i>   | <i>TFAP2C</i>   | <i>DLGAP2</i>     | <i>DAB1</i>     |
| <i>PRDM8</i>    | <i>C1orf226</i> | <i>IL2RA</i>   | <i>KIAA1211L</i> | <i>ZNF662</i>   | <i>OVCH2</i>      | <i>XIRP1</i>    | <i>MIE</i>           | <i>RGS9BP</i>   | <i>TFPI</i>     | <i>SIGLEC1</i>  | <i>PTCH1</i>   | <i>FBLN7</i>    | <i>MDGA2</i>      | <i>KIAA1456</i> |
| <i>SLC45A3</i>  | <i>CDKN2A</i>   | <i>ZFPM2</i>   | <i>CD1C</i>      | <i>TRO</i>      | <i>LMK3</i>       | <i>TSPAN3</i>   | <i>MIG</i>           | <i>SMAD9</i>    | <i>PCDH10</i>   | <i>HDAC9</i>    | <i>MYTIL</i>   | <i>UNC5D</i>    | <i>DAB2IP</i>     | <i>IGSF3</i>    |
| <i>OLFML2A</i>  | <i>TCAM1P</i>   | <i>VWA2</i>    | <i>MS4A1</i>     | <i>DCHS1</i>    | <i>CLIC5</i>      | <i>FTO</i>      | <i>MIX</i>           | <i>RHOBTB3</i>  | <i>DOCK6</i>    | <i>CPED1</i>    | <i>HAR1A</i>   | <i>TACC2</i>    | <i>PTPRG</i>      | <i>CACHD1</i>   |
| <i>STAB1</i>    | <i>DAPK1</i>    | <i>WNT9A</i>   | <i>NLGN4X</i>    | <i>SEMA3F</i>   | <i>KCNN1</i>      | <i>SLC39A10</i> | <i>AGAP1</i>         | <i>HSPD1P11</i> | <i>TPTEP1</i>   | <i>DCHS2</i>    | <i>HAR1B</i>   | <i>EPHA3</i>    | <i>KLF4</i>       | <i>NINL</i>     |
| <i>PVRL2</i>    | <i>EGF</i>      | <i>CA6</i>     | <i>SPRY4</i>     | <i>IRX1</i>     | <i>BIRC7</i>      | <i>SYK</i>      | <i>PTGFRN</i>        | <i>NMNAT3</i>   | <i>PTPRD</i>    | <i>C12orf77</i> | <i>IRX2</i>    | <i>EYA4</i>     | <i>EFNB2</i>      | <i>ELOVL2</i>   |
| <i>AIF1L</i>    | <i>TXNRD3</i>   | <i>CCL17</i>   | <i>CHST3</i>     | <i>SLC32A1</i>  | <i>HAP1</i>       | <i>IKZF1</i>    | <i>OBSL1</i>         | <i>SPATA9</i>   | <i>ST18</i>     | <i>HECW1</i>    | <i>C5orf38</i> | <i>PRL</i>      | <i>RGMA</i>       | <i>NKAIN3</i>   |
| <i>ROBO4</i>    | <i>MN1</i>      | <i>IGJ</i>     | <i>GABRD</i>     | <i>TSHZ3</i>    | <i>ARHGEF4</i>    | <i>RFX5</i>     | <i>RBFOX2</i>        | <i>MAP7</i>     | <i>MECOM</i>    | <i>SLC27A2</i>  | <i>LAMA3</i>   | <i>BASP1</i>    | <i>CRMP1</i>      |                 |
| <i>CYTL1</i>    | <i>CD33</i>     | <i>ENAM</i>    | <i>UTS2</i>      | <i>EBF4</i>     | <i>KIF26B</i>     | <i>PYCR2</i>    | <i>ADAMS1</i>        | <i>MEIS1</i>    | <i>C1orf173</i> | <i>SPAG6</i>    | <i>SLIT2</i>   | <i>GLT1D1</i>   | <i>SH3RF3</i>     |                 |
| <i>CMM2</i>     | <i>GPR162</i>   | <i>MUC4</i>    | <i>GTSF1</i>     | <i>GPR17</i>    | <i>NKAIN1</i>     | <i>CHRNB4</i>   | <i>FAM150B</i>       | <i>PLA2G4A</i>  | <i>XKR3</i>     | <i>NCKAP5</i>   | <i>MYO10</i>   | <i>AFF2</i>     | <i>EVC</i>        |                 |
| <i>KIAA1462</i> | <i>CALN1</i>    | <i>GLI2</i>    | <i>PAX8</i>      | <i>LOXHD1</i>   | <i>RIMBP2</i>     | <i>RANBP3L</i>  | <i>CCDC80</i>        | <i>HOXA10</i>   | <i>EDIL3</i>    | <i>PPM1E</i>    | <i>CUX2</i>    | <i>PLXDC2</i>   | <i>EVC2</i>       |                 |
| <i>MRC1L1</i>   | <i>EHD2</i>     | <i>ECEL1</i>   | <i>TMEM100</i>   | <i>DSG2</i>     | <i>GBA3</i>       | <i>MMP14</i>    | <i>ID4</i>           | <i>HOXA9</i>    | <i>PDE1A</i>    | <i>DCLK2</i>    | <i>TRIM72</i>  | <i>KIAA0125</i> | <i>AKAP12</i>     |                 |
| <i>MRC1</i>     | <i>IFI44L</i>   | <i>ABCA9</i>   | <i>OR7A5</i>     | <i>CLGN</i>     | <i>MYOCD</i>      | <i>LCN8</i>     | <i>EPB41L3</i>       | <i>HOXA7</i>    | <i>NR4A1</i>    | <i>ILDR2</i>    | <i>KSR2</i>    | <i>KANK1</i>    | <i>FLT1</i>       |                 |
| <i>FKBP9</i>    | <i>ZSCAN23</i>  | <i>LDB3</i>    | <i>MUS1</i>      | <i>SLITRK5</i>  | <i>TUSC3</i>      | <i>MYBPC2</i>   | <i>COL4A1</i>        | <i>HOXA5</i>    | <i>NR4A2</i>    | <i>IRF4</i>     | <i>NELL1</i>   | <i>PIEZO2</i>   | <i>KCNS3</i>      |                 |
| <i>CNN2P6</i>   | <i>SHANK3</i>   | <i>GGT5</i>    | <i>EFEMP1</i>    | <i>PRRG1</i>    | <i>ACVR1C</i>     | <i>GSTM1</i>    | <i>COL4A2</i>        | <i>HOXA3</i>    | <i>NR4A3</i>    | <i>FGF9</i>     | <i>NAV2</i>    | <i>CCDC149</i>  | <i>CALD1</i>      |                 |
| <i>ANTXR1</i>   | <i>ACR</i>      | <i>SLCO2B1</i> | <i>EDNRB</i>     | <i>PCDHB14</i>  | <i>SEMA3D</i>     | <i>GSTM5</i>    | <i>ALDH1A1</i>       | <i>TCTN1</i>    | <i>CXXC11</i>   | <i>DUSP4</i>    | <i>PROX1</i>   | <i>KIAA1211</i> | <i>PRR26</i>      |                 |
| <i>STOX2</i>    | <i>SCHIP1</i>   | <i>COL6A3</i>  | <i>CAV1</i>      | <i>PCDHB13</i>  | <i>DSC2</i>       | <i>SCN3A</i>    | <i>GNG12</i>         | <i>SLC12A8</i>  | <i>NEU4</i>     | <i>BCL6</i>     | <i>NLGN4Y</i>  | <i>MS4A2</i>    | <i>NOTCH3</i>     |                 |
| <i>PDZRN3</i>   | <i>EFNA1</i>    | <i>PTPN14</i>  | <i>SHISA2</i>    | <i>RAG1</i>     | <i>AJAP1</i>      | <i>RBMS3</i>    | <i>CHRDL1</i>        | <i>CAMK2B</i>   | <i>LRRC32</i>   | <i>FCRLA</i>    | <i>HCG22</i>   | <i>MERTK</i>    | <i>ROBO1</i>      |                 |
| <i>LAMB2</i>    | <i>MSR1</i>     | <i>SPSB4</i>   | <i>ATP8A2</i>    | <i>BLACE</i>    | <i>IRX3</i>       | <i>BTNL9</i>    | <i>LIFR</i>          | <i>SLC6A13</i>  | <i>FOSL2</i>    | <i>C16orf74</i> | <i>TEX41</i>   | <i>CPAMD8</i>   | <i>SLC44A3</i>    |                 |
| <i>GPC6</i>     | <i>S100Z</i>    | <i>CFH</i>     | <i>PLD1</i>      | <i>CTGF</i>     | <i>LPHN3</i>      | <i>CACNA1H</i>  | <i>FSTL1</i>         | <i>TSGA10</i>   | <i>ABHD17C</i>  | <i>VAT1L</i>    | <i>ADAMS18</i> | <i>F2RL3</i>    | <i>DTX1</i>       |                 |
| <i>IL6R</i>     | <i>EPHA2</i>    | <i>CYYR1</i>   | <i>PP13439</i>   | <i>HRK</i>      | <i>DSC3</i>       | <i>HEY2</i>     | <i>WLS</i>           | <i>ACSM4</i>    | <i>EGR1</i>     | <i>LAMP5</i>    | <i>ASTN1</i>   | <i>TMEM63C</i>  | <i>RASAL1</i>     |                 |
| <i>FUT7</i>     | <i>GPR110</i>   | <i>KLRF2</i>   | <i>CAP2</i>      | <i>LGR5</i>     | <i>IGF2BP1</i>    | <i>EVA1A</i>    | <i>LAPTM4B</i>       | <i>KLRK1</i>    | <i>EGR3</i>     | <i>RNF152</i>   | <i>BRINP2</i>  | <i>LRRC15</i>   | <i>BACH2</i>      |                 |
| <i>RBM47</i>    | <i>BMPR1B</i>   | <i>SCN2A</i>   | <i>RBM24</i>     | <i>HERC2P4</i>  | <i>NOVA1</i>      | <i>CIQTNF4</i>  | <i>DOCK1</i>         | <i>NPTX2</i>    | <i>HCAR2</i>    | <i>INSM1</i>    | <i>CAMK4</i>   | <i>CPN2</i>     | <i>TCL6</i>       |                 |
| <i>IL13RA1</i>  | <i>UNC5C</i>    | <i>CELSR1</i>  | <i>IGF2BP2</i>   | <i>PEG10</i>    | <i>ARHGAP42P5</i> | <i>GREM1</i>    | <i>CDC42BPA</i>      | <i>CSPG4</i>    | <i>LIF</i>      | <i>CPNE8</i>    | <i>KCNMA1</i>  | <i>GP5</i>      | <i>LRRC14B</i>    |                 |
| <i>FAM101B</i>  | <i>RASSF8</i>   | <i>NPY</i>     | <i>C3orf65</i>   | <i>SGCE</i>     | <i>ARHGAP42P4</i> | <i>CLEC14A</i>  | <i>NGFRAP1</i>       | <i>ODF3L1</i>   | <i>CCL3L1</i>   | <i>CRISPLD1</i> | <i>SDC1</i>    | <i>FBLN1</i>    | <i>PLEKHG4B</i>   |                 |
| <i>CECR6</i>    | <i>NRP1</i>     | <i>BVES</i>    | <i>AREG</i>      | <i>TCL1B</i>    | <i>KLF15</i>      | <i>SDC2</i>     | <i>IGFBP5</i>        | <i>SPATA12</i>  | <i>MYRIP</i>    | <i>ROR1</i>     | <i>KCNJ2</i>   | <i>CAMK2D</i>   | <i>PCDH9</i>      |                 |

|                 |                 |               |                |                 |                 |                |               |                |                 |                |                |                  |                 |
|-----------------|-----------------|---------------|----------------|-----------------|-----------------|----------------|---------------|----------------|-----------------|----------------|----------------|------------------|-----------------|
| <i>HGF</i>      | <i>KCNE3</i>    | <i>EPHB3</i>  | <i>FGFR1</i>   | <i>TNR</i>      | <i>MMP15</i>    | <i>AKR1C6P</i> | <i>COL3A1</i> | <i>RNF220</i>  | <i>DLL1</i>     | <i>MAP2</i>    | <i>HPGD</i>    | <i>PHLDB2</i>    | <i>VANGL2</i>   |
| <i>RFX8</i>     | <i>NR3C2</i>    | <i>KLF11</i>  | <i>KHDRBS3</i> | <i>NTNG1</i>    | <i>TRNP1</i>    | <i>F13A1</i>   | <i>CXCL12</i> | <i>SKIDA1</i>  | <i>ST8SIA5</i>  | <i>VIPR2</i>   | <i>ADAM23</i>  | <i>RAPGEF5</i>   | <i>FAM171A1</i> |
| <i>EMID1</i>    | <i>SPON1</i>    | <i>SCML1</i>  | <i>MLLT4</i>   | <i>NOL4</i>     | <i>TRPM4</i>    | <i>XKR4</i>    | <i>VCAM1</i>  | <i>GPR85</i>   | <i>SNAI1</i>    | <i>FOXO6</i>   | <i>OSR2</i>    | <i>PHGDH</i>     | <i>CECR2</i>    |
| <i>LHX6</i>     | <i>SEMA6A</i>   | <i>LDOC1</i>  | <i>KIRREL</i>  | <i>ADARB2</i>   | <i>CCNJL</i>    | <i>SBF1P1</i>  | <i>CD5L</i>   | <i>LPAR3</i>   | <i>GJB2</i>     | <i>APBB2</i>   | <i>MAG11</i>   | <i>SLC7A3</i>    | <i>TCF3</i>     |
| <i>PALM</i>     | <i>MMP28</i>    | <i>CDR1</i>   | <i>SLC16A2</i> | <i>THSD7A</i>   | <i>KCNK3</i>    | <i>NBPF13P</i> | <i>CYP1B1</i> | <i>SLC34A2</i> | <i>SRGN</i>     | <i>FAT1</i>    | <i>CPXM2</i>   | <i>SOGA2</i>     | <i>TCL1A</i>    |
| <i>PRSS57</i>   | <i>ARHGEF17</i> | <i>PCDH18</i> | <i>JPH1</i>    | <i>EVPL</i>     | <i>SDK1</i>     | <i>HHIP</i>    | <i>LPL</i>    | <i>DTNA</i>    | <i>QPCT</i>     | <i>NRG3</i>    | <i>DGKI</i>    | <i>ITIH3</i>     | <i>VPREB3</i>   |
| <i>PLVAP</i>    | <i>NPAP1P6</i>  | <i>VPREB1</i> | <i>NT5E</i>    | <i>PRAME</i>    | <i>KIAA1644</i> | <i>RASSF10</i> | <i>IGFBP3</i> | <i>CNN3</i>    | <i>CEBPB</i>    | <i>BEND4</i>   | <i>PTPRZ1</i>  | <i>KLHL33</i>    | <i>IGLL1</i>    |
| <i>FXYD6</i>    | <i>PTGDR</i>    | <i>UGT3A2</i> | <i>NTSR1</i>   | <i>IGF2BP3</i>  | <i>UNC79</i>    | <i>ATPIA3</i>  | <i>CHL1</i>   | <i>POMC</i>    | <i>C19orf59</i> | <i>CNR1</i>    | <i>HUNK</i>    | <i>SHROOM3</i>   | <i>PAX5</i>     |
| <i>ZC3H12C</i>  | <i>B4GALNT4</i> | <i>GPR173</i> | <i>MDF1</i>    | <i>FSTL5</i>    | <i>TP63</i>     | <i>KCNQ5</i>   | <i>ENPEP</i>  | <i>HES1</i>    | <i>GJB6</i>     | <i>ADAMS12</i> | <i>AADAT</i>   | <i>TMEM136</i>   | <i>EBF1</i>     |
| <i>CCDC26</i>   | <i>GPA33</i>    | <i>ZNF516</i> | <i>MME</i>     | <i>TBC1D9</i>   | <i>CPT1C</i>    | <i>TMEM121</i> | <i>PPBP</i>   | <i>CDYL2</i>   | <i>MPO</i>      | <i>IGHM</i>    | <i>ANKS1B</i>  | <i>ZNF711</i>    | <i>SH2D4B</i>   |
| <i>DDO</i>      | <i>DUSP27</i>   | <i>DDIT4L</i> | <i>ELFN2</i>   | <i>MRV11</i>    | <i>HS3ST4</i>   | <i>SERINC2</i> | <i>PF4</i>    | <i>AGAP3</i>   | <i>PADI2</i>    | <i>IGLL5</i>   | <i>PHACTR3</i> | <i>TMSB15A</i>   | <i>LRR3B</i>    |
| <i>FLT3</i>     | <i>SYNDIG1</i>  | <i>KCNK17</i> | <i>RAI14</i>   | <i>WDFY3</i>    | <i>C1orf222</i> | <i>NKD2</i>    | <i>SDPR</i>   | <i>TMCC3</i>   | <i>CEACAM6</i>  | <i>NYNRIN</i>  | <i>CHST6</i>   | <i>SGCB</i>      | <i>COBL</i>     |
| <i>PCDHGC3</i>  | <i>SCN4A</i>    | <i>NEGR1</i>  | <i>DUSP26</i>  | <i>SIGLEC15</i> | <i>LAMB4</i>    | <i>CLEC11A</i> | <i>VLDLR</i>  | <i>CREB5</i>   | <i>FCN1</i>     | <i>NFATC4</i>  | <i>NLGN1</i>   | <i>TENM4</i>     | <i>MYO18B</i>   |
| <i>CSPG4P13</i> | <i>FZD6</i>     | <i>LHFP</i>   | <i>ID3</i>     | <i>ACKR3</i>    | <i>PEG3</i>     | <i>WT1</i>     | <i>KLHL13</i> | <i>ZBTB16</i>  | <i>HK3</i>      | <i>SYT1</i>    | <i>WNT16</i>   | <i>C14orf132</i> | <i>MKRN3</i>    |
| <i>LPAR4</i>    | <i>CTHRC1</i>   | <i>SNAP91</i> | <i>RASIP1</i>  | <i>ALOX5</i>    | <i>IGSF10</i>   | <i>GPR176</i>  | <i>PPM1H</i>  | <i>F3</i>      | <i>SERPINA1</i> | <i>AFAP1L1</i> | <i>CACNG4</i>  | <i>GJC1</i>      | <i>GRIN1</i>    |
| <i>PROM1</i>    | <i>MMRN1</i>    | <i>P2RY14</i> | <i>FRG2C</i>   | <i>OR13A1</i>   | <i>ADAMS16</i>  | <i>LRFN2</i>   | <i>COL9A3</i> | <i>RGS2</i>    | <i>FPR1</i>     | <i>LRP4</i>    | <i>PBX1</i>    | <i>ATRNL1</i>    | <i>LRR3B</i>    |
| <i>EFCC1</i>    | <i>TM4SF1</i>   | <i>KCNA5</i>  | <i>FGF6</i>    | <i>BMP3</i>     | <i>SEMA5B</i>   | <i>APBA1</i>   | <i>FOXLI</i>  | <i>RGS1</i>    | <i>IL1RN</i>    | <i>TEAD4</i>   | <i>ZNF385D</i> | <i>GLI3</i>      | <i>ESAM</i>     |

**Table S10. Mutations of the genes identified in validation group by targeted deep sequencing**

\*Based on UCSC hg19 reference

| Gene        | Sample | Age  | Amino.Acid.<br>Change | Mutation.Type   | Chr   | Start.   | End.     | Reference.Allele | Variant.Allele        |
|-------------|--------|------|-----------------------|-----------------|-------|----------|----------|------------------|-----------------------|
| <i>MLL2</i> | F234   | 3.1  | p.E1072K              | Missense        | chr12 | 49444157 | 49444157 | C                | T                     |
| <i>MLL2</i> | F229   | 4.6  | p.S3708R              | Missense        | chr12 | 49427364 | 49427364 | G                | C                     |
| <i>MLL2</i> | F365   | 6.8  | p.P2502L              | Missense        | chr12 | 49434048 | 49434048 | G                | A                     |
| <i>MLL2</i> | F318   | 15.4 | p.P3291fs             | Frame_Shift_Del | chr12 | 49431256 | 49431267 | TGGCCTGGGCAG     | T                     |
| <i>MLL2</i> | F215   | 17.8 | p.E4670fs             | Frame_Shift_Ins | chr12 | 49423251 | 49423251 | C                | CCAACCCGGCACGCCCTGGGG |
| <i>MLL2</i> | F326   | 18.1 | p.P2153fs             | Frame_Shift_Ins | chr12 | 49435095 | 49435095 | G                | GGGGGA                |
| <i>MLL2</i> | F348   | 19.3 | p.P4031fs             | Frame_Shift_Ins | chr12 | 49426397 | 49426397 | G                | GA                    |
| <i>MLL2</i> | F298   | 21.3 | p.T1974M              | Missense        | chr12 | 49436060 | 49436060 | G                | A                     |
| <i>MLL2</i> | F366   | 23.4 | p.A963T               | Missense        | chr12 | 49444484 | 49444484 | C                | T                     |

|              |      |      |                |                 |       |           |           |           |           |
|--------------|------|------|----------------|-----------------|-------|-----------|-----------|-----------|-----------|
| <i>MLL2</i>  | F124 | 38.7 | p.F2739fs      | Frame_Shift_Ins | chr12 | 49433232  | 49433232  | A         | AG        |
| <i>MLL2</i>  | F343 | 38.1 | p.K2548E       | Missense        | chr12 | 49433911  | 49433911  | T         | C         |
| <i>MLL2</i>  | F088 | 50   | p.L4532fs      | Frame_Shift_Ins | chr12 | 49424751  | 49424751  | C         | CAGGA     |
| <i>MLL2</i>  | F328 | 56.3 | p.E5484fs      | Frame_Shift_Del | chr12 | 49415887  | 49415895  | GTCACGACT | G         |
| <i>MLL2</i>  | F328 | 56.3 | p.I1300fs      | Frame_Shift_Ins | chr12 | 49443472  | 49443472  | A         | AT        |
| <i>SETD2</i> | F360 | 2.8  | p.H216D        | Missense        | chr3  | 47165480  | 47165480  | G         | C         |
| <i>SETD2</i> | F371 | 2.4  | p.C575S        | Missense        | chr3  | 47164402  | 47164402  | C         | G         |
| <i>SETD2</i> | F230 | 4.3  | p.S820P        | Missense        | chr3  | 47163668  | 47163668  | A         | G         |
| <i>SETD2</i> | F347 | 5.1  | p.P2057fs      | Frame_Shift_Ins | chr3  | 47103775  | 47103775  | A         | ATCCC     |
| <i>SETD2</i> | F126 | 6.3  | p.M45V         | Missense        | chr3  | 47165993  | 47165993  | T         | C         |
| <i>SETD2</i> | F313 | 7.3  | p.R400Q        | Missense        | chr3  | 47164927  | 47164927  | C         | T         |
| <i>SETD2</i> | F296 | 8.8  | p.S1572_splice | Splice_Site     | chr3  | 47155363  | 47155363  | T         | TAGGCGGGC |
| <i>SETD2</i> | F017 | 13.1 | p.V2022A       | Missense        | chr3  | 47108604  | 47108604  | A         | G         |
| <i>SETD2</i> | F187 | 13.2 | p.S676F        | Missense        | chr3  | 47164099  | 47164099  | G         | A         |
| <i>SETD2</i> | F210 | 19.5 | p.C2524fs      | Frame_Shift_Del | chr3  | 47058703  | 47058708  | CTTACA    | C         |
| <i>SETD2</i> | F369 | 19.7 | p.S1350P       | Missense        | chr3  | 47162078  | 47162078  | A         | G         |
| <i>SETD2</i> | F298 | 21.3 | p.R2077_       | Nonsense        | chr3  | 47103717  | 47103717  | G         | A         |
| <i>SETD2</i> | F321 | 26.2 | p.N2058fs      | Frame_Shift_Ins | chr3  | 47103774  | 47103774  | T         | TG        |
| <i>SETD2</i> | F312 | 29.7 | p.S689fs       | Frame_Shift_Ins | chr3  | 47164060  | 47164060  | G         | GACCA     |
| <i>SETD2</i> | F118 | 49.7 | p.N2394K       | Missense        | chr3  | 47084107  | 47084107  | G         | T         |
| <i>NRAS</i>  | F371 | 2.4  | p.G13D         | Missense        | chr1  | 115258744 | 115258744 | C         | T         |
| <i>NRAS</i>  | F273 | 3.4  | p.F156L        | Missense        | chr1  | 115251260 | 115251260 | A         | G         |
| <i>NRAS</i>  | F259 | 3.4  | p.G13D         | Missense        | chr1  | 115258744 | 115258744 | C         | T         |
| <i>NRAS</i>  | F275 | 4    | p.G12D         | Missense        | chr1  | 115258747 | 115258747 | C         | T         |
| <i>NRAS</i>  | F242 | 4.9  | p.G13D         | Missense        | chr1  | 115258744 | 115258744 | C         | T         |
| <i>NRAS</i>  | F303 | 4.8  | p.G12S         | Missense        | chr1  | 115258748 | 115258748 | C         | T         |
| <i>NRAS</i>  | F126 | 6.3  | p.G12S         | Missense        | chr1  | 115258748 | 115258748 | C         | T         |
| <i>NRAS</i>  | F176 | 7.3  | p.G12D         | Missense        | chr1  | 115258747 | 115258747 | C         | T         |
| <i>NRAS</i>  | F313 | 7.3  | p.G12D         | Missense        | chr1  | 115258747 | 115258747 | C         | T         |
| <i>NRAS</i>  | F138 | 9.4  | p.G12C         | Missense        | chr1  | 115258748 | 115258748 | C         | A         |
| <i>NRAS</i>  | F187 | 13.2 | p.G12S         | Missense        | chr1  | 115258748 | 115258748 | C         | T         |
| <i>NRAS</i>  | F010 | 14.9 | p.G12D         | Missense        | chr1  | 115258747 | 115258747 | C         | T         |
| <i>NRAS</i>  | F318 | 15.4 | p.G12C         | Missense        | chr1  | 115258748 | 115258748 | C         | A         |

|             |      |      |                 |                 |       |           |           |         |            |
|-------------|------|------|-----------------|-----------------|-------|-----------|-----------|---------|------------|
| <i>NRAS</i> | F019 | 18.9 | p.G12D          | Missense        | chr1  | 115258747 | 115258747 | C       | T          |
| <i>NRAS</i> | F345 | 19.7 | p.G13R          | Missense        | chr1  | 115258745 | 115258745 | C       | G          |
| <i>NRAS</i> | F348 | 19.3 | p.G12C          | Missense        | chr1  | 115258748 | 115258748 | C       | A          |
| <i>NRAS</i> | F004 | 20.7 | p.G12D          | Missense        | chr1  | 115258747 | 115258747 | C       | T          |
| <i>NRAS</i> | F013 | 27.4 | p.G12S          | Missense        | chr1  | 115258748 | 115258748 | C       | T          |
| <i>NRAS</i> | F335 | 54.4 | p.G12D          | Missense        | chr1  | 115258747 | 115258747 | C       | T          |
| <i>NRAS</i> | F339 | 55.1 | p.G13D          | Missense        | chr1  | 115258744 | 115258744 | C       | T          |
| <i>NRAS</i> | F339 | 55.1 | p.G12D          | Missense        | chr1  | 115258747 | 115258747 | C       | T          |
| <i>FLT3</i> | F238 | 1.3  | p.L576P         | Missense        | chr13 | 28608329  | 28608329  | A       | G          |
| <i>FLT3</i> | F225 | 1.4  | p.T682I         | Missense        | chr13 | 28602323  | 28602323  | G       | A          |
| <i>FLT3</i> | F226 | 2.5  | p.582_583insPTT | In_Frame_Ins    | chr13 | 28608309  | 28608309  | C       | CGGTGGTAGG |
| <i>FLT3</i> | F226 | 2.5  | p.Y572H         | Missense        | chr13 | 28608342  | 28608342  | A       | G          |
| <i>FLT3</i> | F236 | 4.1  | p.S941L         | Missense        | chr13 | 28588626  | 28588626  | G       | A          |
| <i>FLT3</i> | F255 | 4.8  | p.Y842C         | Missense        | chr13 | 28592620  | 28592620  | T       | C          |
| <i>FLT3</i> | F287 | 5.8  | p.N676K         | Missense        | chr13 | 28602340  | 28602340  | G       | T          |
| <i>FLT3</i> | F310 | 11   | p.A680V         | Missense        | chr13 | 28602329  | 28602329  | G       | A          |
| <i>FLT3</i> | F129 | 10.1 | p.I836del       | In_Frame_Del    | chr13 | 28592634  | 28592637  | CATG    | C          |
| <i>FLT3</i> | F038 | 14.6 | p.576_578LQM>RG | In_Frame_Del    | chr13 | 28608323  | 28608329  | ATCTGTA | CCCC       |
| <i>FLT3</i> | F038 | 14.6 | p.Q577del       | In_Frame_Del    | chr13 | 28608325  | 28608328  | CTGT    | C          |
| <i>FLT3</i> | F369 | 19.7 | p.V579G         | Missense        | chr13 | 28608320  | 28608320  | A       | C          |
| <i>FLT3</i> | F211 | 21.7 | p.E573G         | Missense        | chr13 | 28608338  | 28608338  | T       | C          |
| <i>FLT3</i> | F121 | 36.7 | p.R230W         | Missense        | chr13 | 28624286  | 28624286  | T       | A          |
| <i>FLT3</i> | F299 | 46   | p.Y842N         | Missense        | chr13 | 28592621  | 28592621  | A       | T          |
| <i>FLT3</i> | F346 | 54.7 | p.590_591insP   | In_Frame_Ins    | chr13 | 28608285  | 28608285  | A       | GGGG       |
| <i>FLT3</i> | F346 | 54.7 | p.590_591insP   | In_Frame_Ins    | chr13 | 28608285  | 28608285  | A       | AGGG       |
| <i>FLT3</i> | F097 | 57.8 | p.Y572C         | Missense        | chr13 | 28608341  | 28608341  | T       | C          |
| <i>FLT3</i> | F102 | 61.6 | p.T242S         | Missense        | chr13 | 28624249  | 28624249  | G       | C          |
| <i>PAX5</i> | F283 | 2.1  | p.D2E           | Missense        | chr9  | 37034023  | 37034023  | A       | T          |
| <i>PAX5</i> | F166 | 6.4  | p.D2E           | Missense        | chr9  | 37034023  | 37034023  | A       | T          |
| <i>PAX5</i> | F136 | 7.6  | p.K196_         | Nonsense        | chr9  | 37002663  | 37002663  | T       | A          |
| <i>PAX5</i> | F163 | 11.8 | p.P215fs        | Frame_Shift_Ins | chr9  | 36966682  | 36966682  | G       | GC         |
| <i>PAX5</i> | F019 | 18.9 | p.P80R          | Missense        | chr9  | 37015165  | 37015165  | G       | C          |
| <i>PAX5</i> | F067 | 19.1 | p.R140L         | Missense        | chr9  | 37006526  | 37006526  | C       | A          |

|               |      |      |                     |                 |       |          |          |                  |           |
|---------------|------|------|---------------------|-----------------|-------|----------|----------|------------------|-----------|
| <i>PAX5</i>   | F067 | 19.1 | p.R38H              | Missense        | chr9  | 37020732 | 37020732 | C                | T         |
| <i>PAX5</i>   | F312 | 29.7 | p.N195fs            | Frame_Shift_Ins | chr9  | 37002666 | 37002666 | T                | TA        |
| <i>PAX5</i>   | F076 | 38.1 | p.D2E               | Missense        | chr9  | 37034023 | 37034023 | A                | T         |
| <i>PAX5</i>   | F023 | 44.8 | p.R140Q             | Missense        | chr9  | 37006526 | 37006526 | C                | T         |
| <i>PAX5</i>   | F023 | 44.8 | p.P32L              | Missense        | chr9  | 37020750 | 37020750 | G                | A         |
| <i>PAX5</i>   | F118 | 49.7 | p.P80R              | Missense        | chr9  | 37015165 | 37015165 | G                | C         |
| <i>PAX5</i>   | F088 | 50   | p.K222_             | Nonsense        | chr9  | 36966662 | 36966662 | T                | A         |
| <i>PAX5</i>   | F208 | 56   | p.G183S             | Missense        | chr9  | 37002702 | 37002702 | C                | T         |
| <i>PAX5</i>   | F292 | 59.5 | p.D2E               | Missense        | chr9  | 37034023 | 37034023 | A                | T         |
| <i>CREBBP</i> | F227 | 2.9  | p.R1446H            | Missense        | chr16 | 3788617  | 3788617  | C                | T         |
| <i>CREBBP</i> | F232 | 2.2  | p.Q1491K            | Missense        | chr16 | 3786740  | 3786740  | G                | T         |
| <i>CREBBP</i> | F274 | 4.6  | p.S1680del          | Missense        | chr16 | 3781323  | 3781326  | AAGG             | A         |
| <i>CREBBP</i> | F373 | 6.1  | p.2202_2207QQQQQQ>Q | In_Frame_Del    | chr16 | 3778427  | 3778442  | TTGCTGCTGCTGTTGC | T         |
| <i>CREBBP</i> | F157 | 11.5 | p.1433_1434insP     | In_Frame_Ins    | chr16 | 3788653  | 3788653  | A                | AGAG      |
| <i>CREBBP</i> | F102 | 61.6 | p.E1040K            | Missense        | chr16 | 3817853  | 3817853  | C                | T         |
| <i>NFI</i>    | F259 | 3.4  | p.R385C             | Missense        | chr17 | 29528145 | 29528145 | C                | T         |
| <i>NFI</i>    | F277 | 4.8  | p.M645V             | Missense        | chr17 | 29552200 | 29552200 | A                | G         |
| <i>NFI</i>    | F177 | 9    | p.M645V             | Missense        | chr17 | 29552200 | 29552200 | A                | G         |
| <i>NFI</i>    | F002 | 14.6 | p.P1548fs           | Frame_Shift_Ins | chr17 | 29588795 | 29588795 | T                | TTGAGG    |
| <i>NFI</i>    | F318 | 15.4 | p.L2623_splice      | Splice_Site     | chr17 | 29684110 | 29684110 | T                | G         |
| <i>NFI</i>    | F322 | 19   | p.M645V             | Missense        | chr17 | 29552200 | 29552200 | A                | G         |
| <i>NFI</i>    | F109 | 26.4 | p.F154fs            | Frame_Shift_Ins | chr17 | 29490377 | 29490377 | T                | TAGACTTCC |
| <i>NFI</i>    | F321 | 26.2 | p.R69_splice        | Splice_Site     | chr17 | 29486026 | 29486032 | TTAGAGA          | CCTAGGGGG |
| <i>NFI</i>    | F280 | 33.3 | p.M645V             | Missense        | chr17 | 29552200 | 29552200 | A                | G         |
| <i>NFI</i>    | F037 | 38.9 | p.M645V             | Missense        | chr17 | 29552200 | 29552200 | A                | G         |
| <i>NFI</i>    | F297 | 54.8 | p.M645V             | Missense        | chr17 | 29552200 | 29552200 | A                | G         |
| <i>NFI</i>    | F103 | 61.5 | p.V2148fs           | Frame_Shift_Del | chr17 | 29664400 | 29664401 | GT               | G         |
| <i>KRAS</i>   | F283 | 2.1  | p.G13D              | Missense        | chr12 | 25398281 | 25398281 | C                | T         |
| <i>KRAS</i>   | F232 | 2.2  | p.G12D              | Missense        | chr12 | 25398284 | 25398284 | C                | T         |
| <i>KRAS</i>   | F274 | 4.6  | p.G12V              | Missense        | chr12 | 25398284 | 25398284 | C                | A         |
| <i>KRAS</i>   | F277 | 4.8  | p.G12R              | Missense        | chr12 | 25398285 | 25398285 | C                | G         |
| <i>KRAS</i>   | F174 | 6.8  | p.G13D              | Missense        | chr12 | 25398281 | 25398281 | C                | T         |
| <i>KRAS</i>   | F373 | 6.1  | p.L23R              | Missense        | chr12 | 25398251 | 25398251 | A                | C         |

|               |      |      |              |                  |       |           |           |   |         |
|---------------|------|------|--------------|------------------|-------|-----------|-----------|---|---------|
| <i>KRAS</i>   | F369 | 19.7 | p.G12V       | Missense         | chr12 | 25398284  | 25398284  | C | A       |
| <i>KRAS</i>   | F067 | 19.1 | p.G12V       | Missense         | chr12 | 25398284  | 25398284  | C | A       |
| <i>KRAS</i>   | F035 | 30.5 | p.G12D       | Missense         | chr12 | 25398284  | 25398284  | C | T       |
| <i>KRAS</i>   | F354 | 34.1 | p.65_65S>RPG | In_Frame_Ins     | chr12 | 25380263  | 25380263  | A | ACCCGGC |
| <i>KRAS</i>   | F023 | 44.8 | p.Q61L       | Missense         | chr12 | 25380276  | 25380276  | T | A       |
| <i>KRAS</i>   | F118 | 49.7 | p.G12V       | Missense         | chr12 | 25398284  | 25398284  | C | A       |
| <i>PTPN11</i> | F230 | 4.3  | p.D373E      | Missense         | chr12 | 112919904 | 112919904 | T | G       |
| <i>PTPN11</i> | F248 | 4.2  | p.E76K       | Missense         | chr12 | 112888210 | 112888210 | G | A       |
| <i>PTPN11</i> | F285 | 4.7  | p.P491H      | Missense         | chr12 | 112926852 | 112926852 | C | A       |
| <i>PTPN11</i> | F255 | 4.8  | p.G60R       | Missense         | chr12 | 112888162 | 112888162 | G | C       |
| <i>PTPN11</i> | F286 | 5.4  | p.E76G       | Missense         | chr12 | 112888211 | 112888211 | A | G       |
| <i>PTPN11</i> | F224 | 5.3  | p.E76A       | Missense         | chr12 | 112888211 | 112888211 | A | C       |
| <i>PTPN11</i> | F382 | 11.7 | p.E69K       | Missense         | chr12 | 112888189 | 112888189 | G | A       |
| <i>PTPN11</i> | F181 | 13.8 | p.A72D       | Missense         | chr12 | 112888199 | 112888199 | C | A       |
| <i>PTPN11</i> | F078 | 16.9 | p.D61H       | Missense         | chr12 | 112888165 | 112888165 | G | C       |
| <i>PTPN11</i> | F078 | 16.9 | p.T468M      | Missense         | chr12 | 112926270 | 112926270 | C | T       |
| <i>ASXL1</i>  | F275 | 4    | p.R1051C     | Missense         | chr20 | 31023666  | 31023666  | C | T       |
| <i>ASXL1</i>  | F078 | 16.9 | p.E553fs     | Frame_Shift_Ins  | chr20 | 31021659  | 31021659  | A | AGGCG   |
| <i>ASXL1</i>  | F109 | 26.4 | p.A158V      | Missense         | chr20 | 31017142  | 31017142  | C | T       |
| <i>ASXL1</i>  | F308 | 33.3 | p.D954fs     | Frame_Shift_Ins  | chr20 | 31023376  | 31023376  | A | ACTCC   |
| <i>ASXL1</i>  | F308 | 33.3 | p.T600fs     | Frame_Shift_Ins  | chr20 | 31022315  | 31022315  | C | CCGGGG  |
| <i>ASXL1</i>  | F336 | 45.8 | p.R1224T     | Missense         | chr20 | 31024186  | 31024186  | G | C       |
| <i>RUNX1</i>  | F247 | 2.7  | p.K90fs      | Frame_Shift_Ins  | chr21 | 36259142  | 36259142  | T | TG      |
| <i>RUNX1</i>  | F168 | 6.6  | p.M439L      | Missense         | chr21 | 36164479  | 36164479  | T | A       |
| <i>RUNX1</i>  | F318 | 15.4 | p.R244K      | Missense         | chr21 | 36171753  | 36171753  | C | T       |
| <i>RUNX1</i>  | F323 | 26.7 | p.G141R      | Missense         | chr21 | 36252860  | 36252860  | C | T       |
| <i>RUNX1</i>  | F121 | 36.7 | p.R142G      | Missense         | chr21 | 36252857  | 36252857  | T | C       |
| <i>RUNX1</i>  | F317 | 48.3 | p.S295_      | Nonsense         | chr21 | 36171600  | 36171600  | G | C       |
| <i>RUNX1</i>  | F115 | 60.1 | p.P398L      | Missense         | chr21 | 36164601  | 36164601  | G | A       |
| <i>TP53</i>   | F164 | 12.2 | p._394W      | Missense         | chr17 | 7572927   | 7572927   | T | C       |
| <i>JAK2</i>   | F197 | 5.6  | p.R683S      | Missense         | chr9  | 5078362   | 5078362   | A | C       |
| <i>JAK2</i>   | F176 | 7.3  | p._1133S     | Nonstop_Mutation | chr9  | 5126790   | 5126790   | G | C       |
| <i>JAK2</i>   | F296 | 8.8  | p.V392M      | Missense         | chr9  | 5065000   | 5065000   | G | A       |

|              |      |      |                 |                 |       |           |           |                    |       |
|--------------|------|------|-----------------|-----------------|-------|-----------|-----------|--------------------|-------|
| <i>JAK2</i>  | F310 | 11   | p.V392M         | Missense        | chr9  | 5065000   | 5065000   | G                  | A     |
| <i>JAK2</i>  | F290 | 18.1 | p.T875N         | Missense        | chr9  | 5089726   | 5089726   | C                  | A     |
| <i>JAK2</i>  | F312 | 29.7 | p.F694L         | Missense        | chr9  | 5078395   | 5078395   | C                  | G     |
| <i>MET</i>   | F232 | 2.2  | p.L211W         | Missense        | chr7  | 116339770 | 116339770 | T                  | G     |
| <i>MET</i>   | F255 | 4.8  | p.R1148Q        | Missense        | chr7  | 116418932 | 116418932 | G                  | A     |
| <i>MET</i>   | F286 | 5.4  | p.V1287I        | Missense        | chr7  | 116435769 | 116435769 | G                  | A     |
| <i>MET</i>   | F301 | 10.1 | p.L211W         | Missense        | chr7  | 116339770 | 116339770 | T                  | G     |
| <i>MET</i>   | F011 | 17.8 | p.G500S         | Missense        | chr7  | 116380109 | 116380109 | G                  | A     |
| <i>MET</i>   | F079 | 25.2 | p.L211W         | Missense        | chr7  | 116339770 | 116339770 | T                  | G     |
| <i>ETV6</i>  | F310 | 11   | p.V166M         | Missense        | chr12 | 12022390  | 12022390  | G                  | A     |
| <i>ETV6</i>  | F129 | 10.1 | p.R181H         | Missense        | chr12 | 12022436  | 12022436  | G                  | A     |
| <i>ETV6</i>  | F010 | 14.9 | p.V166M         | Missense        | chr12 | 12022390  | 12022390  | G                  | A     |
| <i>ETV6</i>  | F052 | 19   | p.V166M         | Missense        | chr12 | 12022390  | 12022390  | G                  | A     |
| <i>ETV6</i>  | F370 | 43.6 | p.H119fs        | Frame_Shift_Del | chr12 | 12006387  | 12006404  | CATATTCTGAAGCAGAGG | C     |
| <i>GNB1</i>  | F242 | 4.9  | p.G53E          | Missense        | chr1  | 1747240   | 1747240   | C                  | T     |
| <i>GNB1</i>  | F279 | 22.8 | p.I80T          | Missense        | chr1  | 1737942   | 1737942   | A                  | G     |
| <i>GNB1</i>  | F109 | 26.4 | p.118_119insP   | In_Frame_Ins    | chr1  | 1735934   | 1735934   | A                  | AGGG  |
| <i>GNB1</i>  | F006 | 33.2 | p.K89N          | Missense        | chr1  | 1737914   | 1737914   | C                  | G     |
| <i>GNB1</i>  | F328 | 56.3 | p.K89E          | Missense        | chr1  | 1737916   | 1737916   | T                  | C     |
| <i>IKZF1</i> | F248 | 4.2  | p.C175_         | Nonsense        | chr7  | 50450341  | 50450341  | C                  | A     |
| <i>IKZF1</i> | F308 | 33.3 | p.Q366_         | Nonsense        | chr7  | 50467861  | 50467861  | C                  | T     |
| <i>IKZF1</i> | F037 | 38.9 | p.L117fs        | Frame_Shift_Ins | chr7  | 50444421  | 50444421  | A                  | ACCCC |
| <i>IKZF1</i> | F351 | 42.4 | p.D186G         | Missense        | chr7  | 50450373  | 50450373  | A                  | G     |
| <i>MYC</i>   | F230 | 4.3  | p.Q10H          | Missense        | chr8  | 128748869 | 128748869 | G                  | C     |
| <i>MYC</i>   | F230 | 4.3  | p.E39D          | Missense        | chr8  | 128750625 | 128750625 | G                  | C     |
| <i>MYC</i>   | F078 | 16.9 | p.P60L          | Missense        | chr8  | 128750687 | 128750687 | C                  | T     |
| <i>MYC</i>   | F309 | 46.3 | p.F138S         | Missense        | chr8  | 128750921 | 128750921 | T                  | C     |
| <i>MYC</i>   | F217 | 60.4 | p.G88D          | Missense        | chr8  | 128750771 | 128750771 | G                  | A     |
| <i>ZEB2</i>  | F263 | 5.3  | p.1183_1184EE>E | In_Frame_Del    | chr2  | 145147111 | 145147114 | CTCT               | C     |
| <i>ZEB2</i>  | F224 | 5.3  | p.Q3H           | Missense        | chr2  | 145274909 | 145274909 | C                  | G     |
| <i>ZEB2</i>  | F345 | 19.7 | p.H1038R        | Missense        | chr2  | 145147550 | 145147550 | T                  | C     |
| <i>ZEB2</i>  | F089 | 56.4 | p.P498S         | Missense        | chr2  | 145157262 | 145157262 | G                  | A     |
| <i>ZEB2</i>  | F304 | 56.5 | p.1183_1184EE>E | In_Frame_Del    | chr2  | 145147111 | 145147114 | CTCT               | C     |



|               |      |      |               |                 |       |           |           |    |        |
|---------------|------|------|---------------|-----------------|-------|-----------|-----------|----|--------|
| <i>EZH2</i>   | F067 | 19.1 | p.Y663C       | Missense        | chr7  | 148507466 | 148507466 | T  | C      |
| <i>EZH2</i>   | F086 | 50.1 | p.R690H       | Missense        | chr7  | 148506443 | 148506443 | C  | T      |
| <i>EZH2</i>   | F088 | 50   | p.F290fs      | Frame_Shift_Ins | chr7  | 148523584 | 148523584 | A  | ACT    |
| <i>INSRR</i>  | F176 | 7.3  | p.A224E       | Missense        | chr1  | 156821950 | 156821950 | G  | T      |
| <i>INSRR</i>  | F195 | 13.1 | p.C246Y       | Missense        | chr1  | 156821884 | 156821884 | C  | T      |
| <i>INSRR</i>  | F006 | 33.2 | p.G677R       | Missense        | chr1  | 156815556 | 156815556 | C  | T      |
| <i>INSRR</i>  | F037 | 38.9 | p.R140H       | Missense        | chr1  | 156823762 | 156823762 | C  | T      |
| <i>TET2</i>   | F148 | 5.5  | p.R550Q       | Missense        | chr4  | 106156748 | 106156748 | G  | A      |
| <i>ERBB4</i>  | F365 | 6.8  | p.R979Q       | Missense        | chr2  | 212286760 | 212286760 | C  | T      |
| <i>ERBB4</i>  | F163 | 11.8 | p.Y53C        | Missense        | chr2  | 212989553 | 212989553 | T  | C      |
| <i>ERBB4</i>  | F072 | 15.8 | p.D1257H      | Missense        | chr2  | 212248498 | 212248498 | C  | G      |
| <i>JAK1</i>   | F236 | 4.1  | p.R506C       | Missense        | chr1  | 65321324  | 65321324  | G  | A      |
| <i>JAK1</i>   | F307 | 18.4 | p.V658I       | Missense        | chr1  | 65312347  | 65312347  | C  | T      |
| <i>JAK1</i>   | F366 | 23.4 | p.V658F       | Missense        | chr1  | 65312347  | 65312347  | C  | A      |
| <i>P4HA2</i>  | F232 | 2.2  | p.R435M       | Missense        | chr5  | 131534573 | 131534573 | C  | A      |
| <i>P4HA2</i>  | F181 | 13.8 | p.Q140R       | Missense        | chr5  | 131549659 | 131549659 | T  | C      |
| <i>P4HA2</i>  | F369 | 19.7 | p.R367H       | Missense        | chr5  | 131539826 | 131539826 | C  | T      |
| <i>UBA2</i>   | F038 | 14.6 | p.W217_       | Nonsense        | chr19 | 34935905  | 34935905  | G  | A      |
| <i>UBA2</i>   | F050 | 14.6 | p.H332fs      | Frame_Shift_Ins | chr19 | 34943008  | 34943009  | CA | GCCTGG |
| <i>UBA2</i>   | F035 | 30.5 | p.I263V       | Missense        | chr19 | 34941185  | 34941185  | A  | G      |
| <i>XBPI</i>   | F228 | 4    | p.A249V       | Missense        | chr22 | 29191548  | 29191548  | G  | A      |
| <i>XBPI</i>   | F263 | 5.3  | p.V127L       | Missense        | chr22 | 29193139  | 29193139  | C  | A      |
| <i>XBPI</i>   | F118 | 49.7 | p.G184S       | Missense        | chr22 | 29192058  | 29192058  | C  | T      |
| <i>JAK3</i>   | F343 | 38.1 | p.M566V       | Missense        | chr19 | 17948746  | 17948746  | T  | C      |
| <i>JAK3</i>   | F311 | 63.4 | p.V722I       | Missense        | chr19 | 17945696  | 17945696  | C  | T      |
| <i>PROKRI</i> | F010 | 14.9 | p.R89C        | Missense        | chr2  | 68873218  | 68873218  | C  | T      |
| <i>PROKRI</i> | F079 | 25.2 | p.G77S        | Missense        | chr2  | 68873182  | 68873182  | G  | A      |
| <i>BTGI</i>   | F093 | 54.8 | p.103_103T>MS | In_Frame_Ins    | chr12 | 92538064  | 92538064  | G  | GACA   |
| <i>CD3EAP</i> | F103 | 61.5 | p.R59W        | Missense        | chr19 | 45911401  | 45911401  | C  | T      |
| <i>CLDN22</i> | F292 | 59.5 | p.S110R       | Missense        | chr4  | 184241042 | 184241042 | A  | C      |
| <i>CXCR7</i>  | F296 | 8.8  | p.T79M        | Missense        | chr2  | 237489344 | 237489344 | C  | T      |
| <i>EBF1</i>   | F004 | 20.7 | p.R242Q       | Missense        | chr5  | 158250237 | 158250237 | C  | T      |
| <i>EVI5L</i>  | F323 | 26.7 | p.R629H       | Missense        | chr19 | 7927392   | 7927392   | G  | A      |

|                |      |      |          |                 |       |          |          |           |      |
|----------------|------|------|----------|-----------------|-------|----------|----------|-----------|------|
| <i>RB1</i>     | F279 | 22.8 | p.I422fs | Frame_Shift_Del | chr13 | 48951102 | 48951110 | ATAGGATAC | CGGG |
| <i>SLC22A6</i> | F190 | 8.6  | p.S195L  | Missense        | chr11 | 62751053 | 62751053 | G         | A    |

**Table S11. Frequencies of key fusions and mutations of genes screened in the large cohort\***

\*A total of 383 patients (179 adults and 204 children) were investigated.

| Gene                  | Total  |               | Adults |               | Children |               | P value |
|-----------------------|--------|---------------|--------|---------------|----------|---------------|---------|
|                       | Number | Frequency (%) | Number | Frequency (%) | Number   | Frequency (%) |         |
| <i>BCR-ABL1</i>       | 73     | 19.1          | 49     | 27.4          | 24       | 11.8          | <0.001  |
| <i>ETV6-RUNX1</i>     | 36     | 9.4           | 1      | 0.6           | 35       | 17.2          | <0.001  |
| <i>TCF3-PBX1</i>      | 21     | 5.5           | 9      | 5             | 12       | 5.9           | 0.71    |
| <i>MLL</i> rearranged | 18     | 4.7           | 12     | 6.7           | 6        | 2.9           | 0.08    |
| <i>MEF2D</i> fusions  | 19     | 5.1           | 12     | 6.8           | 7        | 3.5           | 0.15    |
| <i>ZNF384</i> fusions | 21     | 5.6           | 13     | 7.3           | 8        | 4             | 0.16    |
| <i>NRAS</i>           | 46     | 12            | 16     | 8.9           | 30       | 14.7          | 0.08    |
| <i>FLT3</i>           | 28     | 7.3           | 13     | 7.3           | 15       | 7.4           | 0.97    |
| <i>MLL2</i>           | 27     | 7             | 18     | 10.1          | 9        | 4.4           | 0.03    |
| <i>KRAS</i>           | 27     | 7             | 11     | 6.1           | 16       | 7.8           | 0.52    |
| <i>PAX5</i>           | 27     | 7             | 17     | 9.5           | 10       | 4.9           | 0.08    |
| <i>SETD2</i>          | 25     | 6.5           | 13     | 7.3           | 12       | 5.9           | 0.59    |
| <i>PTPN11</i>         | 18     | 4.7           | 4      | 2.2           | 14       | 6.9           | 0.03    |
| <i>NF1</i>            | 17     | 4.4           | 11     | 6.1           | 6        | 2.9           | 0.13    |
| <i>RUNX1</i>          | 13     | 3.4           | 9      | 5             | 4        | 2             | 0.1     |
| <i>CREBBP</i>         | 11     | 2.9           | 4      | 2.2           | 7        | 3.4           | 0.48    |
| <i>GNB1</i>           | 9      | 2.3           | 6      | 3.4           | 3        | 1.5           | 0.32    |
| <i>MET</i>            | 9      | 2.3           | 2      | 1.1           | 7        | 3.4           | 0.18    |
| <i>ZEB2</i>           | 9      | 2.3           | 5      | 2.8           | 4        | 2             | 0.74    |
| <i>ETV6</i>           | 9      | 2.3           | 4      | 2.2           | 5        | 2.5           | 1       |
| <i>ASXL1</i>          | 8      | 2.1           | 6      | 3.4           | 2        | 1             | 0.15    |
| <i>JAK2</i>           | 8      | 2.1           | 4      | 2.2           | 4        | 2             | 1       |
| <i>IKZF1</i>          | 8      | 2.1           | 7      | 3.9           | 1        | 0.5           | 0.03    |

|                  |   |     |   |     |   |     |       |
|------------------|---|-----|---|-----|---|-----|-------|
| <i>EZH2</i>      | 7 | 1.8 | 6 | 3.4 | 1 | 0.5 | 0.05  |
| <i>MYC</i>       | 7 | 1.8 | 5 | 2.8 | 2 | 1   | 0.26  |
| <i>UBA2</i>      | 7 | 1.8 | 1 | 0.6 | 6 | 2.9 | 0.13  |
| <i>INSRR</i>     | 6 | 1.6 | 3 | 1.7 | 3 | 1.5 | 1     |
| <i>ERBB4</i>     | 6 | 1.6 | 2 | 1.1 | 4 | 2   | 0.69  |
| <i>XBP1</i>      | 6 | 1.6 | 4 | 2.2 | 2 | 1   | 0.42  |
| <i>P4HA2</i>     | 5 | 1.3 | 2 | 1.1 | 3 | 1.5 | 1     |
| <i>JAK3</i>      | 4 | 1   | 4 | 2.2 | 0 | 0   | 0.047 |
| <i>JAK1</i>      | 4 | 1   | 2 | 1.1 | 2 | 1   | 1     |
| <i>PROKR1</i>    | 4 | 1   | 2 | 1.1 | 2 | 1   | 1     |
| <i>EVI5L</i>     | 4 | 1   | 1 | 0.6 | 3 | 1.5 | 0.63  |
| <i>TP53</i>      | 4 | 1   | 2 | 1.1 | 2 | 1   | 1     |
| <i>RIT1</i>      | 3 | 0.8 | 2 | 1.1 | 1 | 0.5 | 0.6   |
| <i>CXCR7</i>     | 3 | 0.8 | 1 | 0.6 | 2 | 1   | 1     |
| <i>BTG1</i>      | 3 | 0.8 | 1 | 0.6 | 2 | 1   | 1     |
| <i>RBI</i>       | 3 | 0.8 | 1 | 0.6 | 2 | 1   | 1     |
| <i>CLDN22</i>    | 3 | 0.8 | 2 | 1.1 | 1 | 0.5 | 0.6   |
| <i>SLC22A6</i>   | 3 | 0.8 | 1 | 0.6 | 2 | 1   | 1     |
| <i>CD3EAP</i>    | 3 | 0.8 | 1 | 0.6 | 2 | 1   | 1     |
| <i>KDM5C</i>     | 2 | 0.5 | 1 | 0.6 | 1 | 0.5 | 1     |
| <i>TET2</i>      | 2 | 0.5 | 1 | 0.6 | 1 | 0.5 | 1     |
| <i>HIST1H2AG</i> | 2 | 0.5 | 0 | 0   | 2 | 1   | 0.5   |
| <i>GPR137C</i>   | 2 | 0.5 | 1 | 0.6 | 1 | 0.5 | 1     |
| <i>IL1RAPL1</i>  | 2 | 0.5 | 1 | 0.6 | 1 | 0.5 | 1     |
| <i>PDE1A</i>     | 2 | 0.5 | 1 | 0.6 | 1 | 0.5 | 1     |
| <i>EBF1</i>      | 2 | 0.5 | 2 | 1.1 | 0 | 0   | 0.22  |
| <i>PHF6</i>      | 2 | 0.5 | 2 | 1.1 | 0 | 0   | 0.22  |
| <i>ST6GAL2</i>   | 2 | 0.5 | 1 | 0.6 | 1 | 0.5 | 1     |
| <i>KCNV1</i>     | 2 | 0.5 | 1 | 0.6 | 1 | 0.5 | 1     |
| <i>PABPC3</i>    | 2 | 0.5 | 2 | 1.1 | 0 | 0   | 0.22  |
| <i>ADARB1</i>    | 1 | 0.5 | 0 | 0   | 2 | 1   | 0.5   |

---

**Table S12. Comparisons of outcome between adult and pediatric patients within each gene expression subgroup\***

\*The survival data was estimated in each gene expression subgroup. Patients without RNA-seq data were assigned to the cluster groups according to the dominant genetic subtypes. Thus, patients with *MEF2D* fusions were assigned to G1, *TCF3-PBX1* to G2, *ETV6-RUNX1* to G3, *ZNF384* fusions to G5, *MLL* rearranged to G7 and *BCR-ABL1* to G8.

| Cluster subgroup | Dominant genetic subtype             | Adult |                         | Pediatric |                         | P value |
|------------------|--------------------------------------|-------|-------------------------|-----------|-------------------------|---------|
|                  |                                      | No.   | % 5-year OS ( $\pm$ SE) | No.       | % 5-year OS ( $\pm$ SE) |         |
| G1               | <i>MEF2D</i> fusions                 | 13    | 26.7 $\pm$ 16.0         | 7         | 44.4 $\pm$ 22.2         | 0.102   |
| G2               | <i>TCF3-PBX1</i>                     | 9     | 60.0 $\pm$ 18.2         | 12        | 100 $\pm$ 0.0           | 0.035   |
| G3               | <i>ETV6-RUNX1</i>                    | 1     | -                       | 32        | 100 $\pm$ 0.0           | -       |
| G4               | <i>ERG</i> deletion/ <i>DUX4-IGH</i> | 5     | 53.3 $\pm$ 24.8         | 6         | 100 $\pm$ 0.0           | 0.077   |
| G5               | <i>ZNF384</i> fusions                | 13    | 38.6 $\pm$ 28.2         | 10        | 83.3 $\pm$ 15.2         | 0.334   |
| G6               | Hyperdiploidy                        | 1     | -                       | 20        | 100 $\pm$ 0.0           | -       |
| G7               | <i>MLL</i> rearranged                | 28    | 20.1 $\pm$ 15.8         | 16        | 54.1 $\pm$ 18.0         | 0.174   |
| G8               | <i>BCR-ABL1</i>                      | 47    | 11.2 $\pm$ 7.0          | 23        | 39.3 $\pm$ 13.4         | 0.071   |
|                  | <i>BCR-ABL1</i> -like                | 8     | 43.8 $\pm$ 31.5         | 5         | 75.0 $\pm$ 21.7         | 0.73    |
| Overall          | -                                    | 169   | 30.5 $\pm$ 6.2          | 193       | 69.6 $\pm$ 4.3          | <0.001  |

**Table S13. Comparisons of outcome between adult and pediatric patients within each genetic subtype**

|                       | Adult |                         | Pediatric |                         | P value |
|-----------------------|-------|-------------------------|-----------|-------------------------|---------|
|                       | No.   | % 5-year OS ( $\pm$ SE) | No.       | % 5-year OS ( $\pm$ SE) |         |
| <i>BCR-ABL1</i>       | 48    | 15.2 $\pm$ 7.5          | 23        | 39.3 $\pm$ 13.4         | 0.114   |
| <i>BCR-ABL1</i> -like | 8     | 43.8 $\pm$ 31.5         | 5         | 75.0 $\pm$ 21.7         | 0.730   |
| <i>MLL</i> rearranged | 12    | 0 $\pm$ 0.0             | 4         | 66.7 $\pm$ 27.2         | 0.172   |
| <i>TCF3-PBX1</i>      | 9     | 60.0 $\pm$ 18.2         | 12        | 100 $\pm$ 0.0           | 0.035   |
| <i>ETV6-RUNX1</i>     | 1     | -                       | 31        | 100 $\pm$ 0.0           | -       |
| <i>ZNF384</i> fusions | 12    | 38.6 $\pm$ 28.2         | 8         | 75.0 $\pm$ 21.7         | 0.552   |
| <i>MEF2D</i> fusions  | 12    | 15.6 $\pm$ 14.2         | 6         | 40.0 $\pm$ 21.9         | 0.064   |
| Hyperdiploidy>50      | 1     | -                       | 14        | 65.6 $\pm$ 16.4         | -       |
| Hypodiploidy          | 12    | 0 $\pm$ 0.0             | 4         | 66.7 $\pm$ 27.2         | 0.070   |
| others                | 54    | 51.2 $\pm$ 8.1          | 86        | 67.3 $\pm$ 6.5          | 0.003   |

Overall 169 30.5±6.2 193 69.6±4.3 <0.001

---

**Table S14. Genes in pathway analysis**

| <b>Gene</b>      | <b>Pathway</b>     |
|------------------|--------------------|
| <i>BTG1</i>      | B-cell Development |
| <i>EBF1</i>      | B-cell Development |
| <i>ETV6</i>      | B-cell Development |
| <i>IKZF1</i>     | B-cell Development |
| <i>PAX5</i>      | B-cell Development |
| <i>RUNX1</i>     | B-cell Development |
| <i>XBP1</i>      | B-cell Development |
| <i>VPREB1</i>    | B-cell Development |
| <i>IRF8</i>      | B-cell Development |
| <i>FOXP1</i>     | B-cell Development |
| <i>TCF3</i>      | B-cell Development |
| <i>IKZF3</i>     | B-cell Development |
| <i>BCL11A</i>    | B-cell Development |
| <i>IKZF2</i>     | B-cell Development |
| <i>BCL2</i>      | B-cell Development |
| <i>RAG1</i>      | B-cell Development |
| <i>RAG2</i>      | B-cell Development |
| <i>LEF1</i>      | B-cell Development |
| <i>RB1</i>       | Cell cycle         |
| <i>TP53</i>      | Cell cycle         |
| <i>CDKN2A/2B</i> | Cell cycle         |
| <i>ASXL1</i>     | Epigenetic         |
| <i>CREBBP</i>    | Epigenetic         |
| <i>EZH2</i>      | Epigenetic         |
| <i>HIST1H2AG</i> | Epigenetic         |
| <i>KDM5C</i>     | Epigenetic         |
| <i>MLL2</i>      | Epigenetic         |

|                          |                 |
|--------------------------|-----------------|
| <i>MYC</i>               | Epigenetic      |
| <i>PHF6</i>              | Epigenetic      |
| <i>SETD2</i>             | Epigenetic      |
| <i>TET2</i>              | Epigenetic      |
| <i>CHD4</i>              | Epigenetic      |
| <i>CHD2</i>              | Epigenetic      |
| <i>HDAC5</i>             | Epigenetic      |
| <i>NEK6</i>              | Epigenetic      |
| <i>PARP4</i>             | Epigenetic      |
| <i>PBRM1</i>             | Epigenetic      |
| <i>ASXL2</i>             | Epigenetic      |
| <i>TET3</i>              | Epigenetic      |
| <i>JMJD1C</i>            | Epigenetic      |
| <i>ATRX</i>              | Epigenetic      |
| <i>H3F3A</i>             | Epigenetic      |
| <i>ARID1A</i>            | Epigenetic      |
| <i>SMARCA4</i>           | Epigenetic      |
| <i>BCR-ABL1</i>          | Key fusions     |
| <i>TCF3-PBX1</i>         | Key fusions     |
| <i>MLL rearrangement</i> | Key fusions     |
| <i>ETV6-RUNX1</i>        | Key fusions     |
| <i>MEF2D fusions</i>     | Key fusions     |
| <i>ZNF384 fusions</i>    | Key fusions     |
| <i>JAK1</i>              | JAK pathway     |
| <i>JAK2</i>              | JAK pathway     |
| <i>JAK3</i>              | JAK pathway     |
| <i>IL7R</i>              | JAK pathway     |
| <i>CXCR7</i>             | Other signaling |
| <i>ERBB4</i>             | Other signaling |
| <i>EVI5L</i>             | Other signaling |
| <i>GNB1</i>              | Other signaling |
| <i>GPRI37C</i>           | Other signaling |
| <i>IL1RAPL1</i>          | Other signaling |

|                |                 |
|----------------|-----------------|
| <i>INSRR</i>   | Other signaling |
| <i>MET</i>     | Other signaling |
| <i>PDE1A</i>   | Other signaling |
| <i>PROKR1</i>  | Other signaling |
| <i>RIT1</i>    | Other signaling |
| <i>ADARBI</i>  | Others          |
| <i>CD3EAP</i>  | Others          |
| <i>CLDN22</i>  | Others          |
| <i>KCNV1</i>   | Others          |
| <i>P4HA2</i>   | Others          |
| <i>PABPC3</i>  | Others          |
| <i>SLC22A6</i> | Others          |
| <i>ST6GAL2</i> | Others          |
| <i>UBA2</i>    | Others          |
| <i>ZEB2</i>    | Others          |
| <i>FLT3</i>    | RAS pathway     |
| <i>KRAS</i>    | RAS pathway     |
| <i>NF1</i>     | RAS pathway     |
| <i>NRAS</i>    | RAS pathway     |
| <i>PTPN11</i>  | RAS pathway     |
| <i>BRAF</i>    | RAS pathway     |

**Table S15. Sequencing coverage metrics**

\*Patient ID+A: Tumor sample; Patient ID+C: Matched germline sample

†Based on 33 Mb RefSeq coding region

| Platform | Patient ID <sup>*</sup> | Reads Number | %Reads Mapped | Mean Depth of Coverage <sup>†</sup> | % Coding Exonic † (Whole Genome) bases covered |        |        |        |        |        |        |
|----------|-------------------------|--------------|---------------|-------------------------------------|------------------------------------------------|--------|--------|--------|--------|--------|--------|
|          |                         |              |               |                                     | ≥1X                                            | ≥4X    | ≥8X    | ≥10X   | ≥15X   | ≥20X   | ≥30X   |
| WES      | A01A                    | 99177130     | 88.6%         | 94.1                                | 96.13%                                         | 91.20% | 87.05% | 85.25% | 81.05% | 77.16% | 70.38% |
| WES      | A01C                    | 103309028    | 88.7%         | 97.2                                | 96.08%                                         | 91.09% | 86.83% | 84.99% | 80.70% | 76.76% | 69.99% |
| WES      | A02A                    | 100000124    | 88.8%         | 94.1                                | 96.18%                                         | 91.06% | 86.69% | 84.77% | 80.37% | 76.41% | 69.63% |

|     |      |           |       |       |        |        |        |        |        |        |        |
|-----|------|-----------|-------|-------|--------|--------|--------|--------|--------|--------|--------|
| WES | A02C | 99897854  | 88.0% | 92.0  | 95.56% | 90.00% | 85.23% | 83.15% | 78.40% | 74.25% | 67.34% |
| WES | A03A | 111461616 | 79.1% | 78.0  | 95.43% | 89.59% | 84.48% | 82.21% | 77.04% | 72.51% | 65.03% |
| WES | A03C | 111772468 | 84.3% | 88.5  | 95.87% | 90.54% | 85.95% | 83.94% | 79.30% | 75.14% | 68.06% |
| WES | A04A | 100738948 | 87.0% | 71.3  | 95.88% | 89.76% | 84.47% | 82.13% | 76.80% | 72.13% | 64.24% |
| WES | A04C | 110765852 | 83.4% | 91.4  | 95.04% | 88.95% | 83.66% | 81.38% | 76.36% | 72.09% | 65.25% |
| WES | A05A | 107202278 | 72.3% | 72.8  | 94.12% | 87.12% | 80.98% | 78.33% | 72.63% | 67.95% | 60.59% |
| WES | A05C | 93566934  | 80.3% | 72.7  | 95.26% | 89.27% | 84.02% | 81.68% | 76.28% | 71.54% | 63.64% |
| WES | A06A | 109169678 | 74.8% | 85.8  | 94.81% | 88.66% | 83.23% | 80.86% | 75.55% | 71.09% | 64.07% |
| WES | A06C | 92974692  | 78.5% | 77.9  | 95.01% | 88.94% | 83.51% | 81.09% | 75.62% | 70.92% | 63.46% |
| WES | A07A | 104837958 | 86.7% | 112.9 | 95.23% | 89.74% | 85.23% | 83.28% | 78.90% | 75.08% | 68.81% |
| WES | A07C | 89017714  | 89.0% | 104.6 | 95.62% | 90.91% | 86.68% | 84.86% | 80.61% | 76.72% | 70.06% |
| WES | A08A | 104151082 | 87.8% | 118.5 | 95.48% | 89.69% | 84.52% | 82.32% | 77.42% | 73.25% | 66.67% |
| WES | A08C | 105364116 | 87.5% | 124.9 | 95.57% | 90.20% | 85.49% | 83.47% | 78.93% | 74.94% | 68.53% |
| WES | A09A | 96986036  | 88.7% | 111.4 | 96.53% | 92.17% | 88.18% | 86.42% | 82.19% | 78.12% | 70.91% |
| WES | A09C | 102807838 | 85.3% | 96.9  | 93.83% | 87.46% | 81.72% | 79.24% | 73.92% | 69.59% | 62.94% |
| WES | A10A | 79476300  | 85.1% | 85.2  | 95.32% | 90.54% | 86.17% | 84.24% | 79.84% | 75.76% | 68.44% |
| WES | A10C | 81157330  | 89.3% | 89.4  | 95.06% | 89.71% | 84.85% | 82.69% | 77.70% | 73.28% | 66.09% |
| WES | A11A | 81488006  | 86.2% | 83.5  | 95.60% | 90.99% | 86.71% | 84.76% | 80.18% | 75.80% | 67.72% |
| WES | A11C | 81399236  | 87.2% | 83.2  | 95.68% | 90.63% | 86.06% | 84.03% | 79.28% | 74.95% | 67.38% |
| WES | A12A | 150152088 | 98.7% | 184.8 | 98.82% | 98.20% | 97.69% | 97.45% | 96.86% | 96.24% | 94.74% |
| WES | A12C | 145226004 | 98.3% | 173.0 | 98.83% | 98.21% | 97.72% | 97.49% | 96.91% | 96.29% | 94.82% |
| WES | A13A | 62467344  | 90.1% | 70.0  | 95.85% | 90.33% | 85.03% | 82.63% | 76.94% | 71.80% | 63.26% |
| WES | A13C | 135020902 | 79.8% | 120.6 | 98.19% | 96.43% | 94.56% | 93.67% | 91.32% | 88.68% | 82.55% |
| WES | A14A | 62153662  | 88.9% | 71.1  | 98.48% | 96.83% | 94.60% | 93.31% | 89.51% | 85.05% | 75.02% |
| WES | A14C | 76527808  | 88.8% | 80.0  | 98.53% | 96.94% | 94.89% | 93.73% | 90.37% | 86.43% | 77.53% |
| WES | A15A | 70337612  | 90.8% | 82.4  | 96.63% | 91.17% | 86.17% | 83.98% | 78.86% | 74.26% | 66.39% |
| WES | A15C | 79819628  | 89.5% | 91.6  | 96.31% | 91.56% | 87.20% | 85.27% | 80.71% | 76.41% | 68.88% |
| WES | A16A | 137380870 | 90.8% | 151.2 | 95.87% | 92.70% | 89.37% | 87.94% | 84.68% | 81.69% | 76.18% |
| WES | A16C | 126546910 | 98.9% | 158.4 | 98.81% | 98.11% | 97.51% | 97.23% | 96.49% | 95.69% | 93.77% |
| WES | A17A | 92164030  | 88.8% | 112.9 | 98.39% | 96.86% | 95.15% | 94.22% | 91.68% | 88.89% | 82.75% |
| WES | A17C | 87126490  | 89.9% | 109.0 | 98.40% | 96.98% | 95.45% | 94.63% | 92.32% | 89.64% | 83.57% |
| WES | A18A | 105231710 | 88.8% | 114.7 | 98.10% | 96.38% | 94.41% | 93.41% | 90.84% | 88.16% | 82.53% |
| WES | A18C | 107518228 | 87.3% | 119.2 | 98.07% | 96.29% | 94.31% | 93.31% | 90.72% | 88.03% | 82.43% |



|     |      |           |       |       |        |        |        |        |        |        |        |
|-----|------|-----------|-------|-------|--------|--------|--------|--------|--------|--------|--------|
| WES | A19A | 102661926 | 89.7% | 116.3 | 98.33% | 96.84% | 95.22% | 94.39% | 92.19% | 89.84% | 84.65% |
| WES | A19C | 101434906 | 89.7% | 115.5 | 98.30% | 96.75% | 95.00% | 94.10% | 91.77% | 89.28% | 83.88% |
| WES | A20A | 107417324 | 97.3% | 68.6  | 99.06% | 97.50% | 95.93% | 95.09% | 92.51% | 89.18% | 80.46% |
| WES | A20C | 103554248 | 98.5% | 127.9 | 98.71% | 97.91% | 97.19% | 96.84% | 95.88% | 94.79% | 91.97% |
| WES | A21A | 161343512 | 98.9% | 203.7 | 98.98% | 98.41% | 97.96% | 97.75% | 97.22% | 96.66% | 95.37% |
| WES | A21C | 151568234 | 97.7% | 189.2 | 98.84% | 98.23% | 97.72% | 97.48% | 96.88% | 96.24% | 94.75% |
| WES | A22A | 96675786  | 98.6% | 113.6 | 98.58% | 97.78% | 97.03% | 96.66% | 95.63% | 94.38% | 91.04% |
| WES | A22C | 135750602 | 98.8% | 168.8 | 98.64% | 97.97% | 97.42% | 97.17% | 96.53% | 95.84% | 94.19% |
| WES | A23A | 131917540 | 98.7% | 162.1 | 98.75% | 98.04% | 97.41% | 97.12% | 96.37% | 95.54% | 93.56% |
| WES | A23C | 132223032 | 98.6% | 160.9 | 98.71% | 97.97% | 97.36% | 97.08% | 96.33% | 95.52% | 93.55% |
| WES | A24A | 208184384 | 98.9% | 265.4 | 98.42% | 97.09% | 95.78% | 95.18% | 93.80% | 92.54% | 90.34% |
| WES | A24C | 189493790 | 99.0% | 238.7 | 98.18% | 96.58% | 94.97% | 94.24% | 92.56% | 91.07% | 88.48% |
| WES | A25A | 205650646 | 99.0% | 249.6 | 98.06% | 96.46% | 94.94% | 94.25% | 92.71% | 91.32% | 88.91% |
| WES | A25C | 239453414 | 99.1% | 301.5 | 98.03% | 96.54% | 95.06% | 94.42% | 92.96% | 91.64% | 89.33% |
| WES | A26A | 195115556 | 98.4% | 203.4 | 99.21% | 98.41% | 97.87% | 97.65% | 97.13% | 96.58% | 95.27% |
| WES | A26C | 174339204 | 98.1% | 167.2 | 99.07% | 98.23% | 97.61% | 97.34% | 96.64% | 95.86% | 93.91% |
| WES | A27A | 89538798  | 83.1% | 94.7  | 94.54% | 88.34% | 82.76% | 80.33% | 75.01% | 70.63% | 63.86% |
| WES | A27C | 140491114 | 98.9% | 168.3 | 98.73% | 98.07% | 97.51% | 97.25% | 96.59% | 95.88% | 94.16% |
| WES | A28A | 179890220 | 99.0% | 227.0 | 98.81% | 98.04% | 97.53% | 97.31% | 96.79% | 96.24% | 95.07% |
| WES | A28C | 160949104 | 98.7% | 203.8 | 98.25% | 96.98% | 95.71% | 95.13% | 93.76% | 92.51% | 90.20% |
| WES | A29A | 170230078 | 98.1% | 172.2 | 97.89% | 96.04% | 94.01% | 93.08% | 90.98% | 89.09% | 85.47% |
| WES | A29C | 104529198 | 98.9% | 126.2 | 99.14% | 98.44% | 97.76% | 97.41% | 96.43% | 95.27% | 92.26% |
| WES | A30A | 144351412 | 98.9% | 174.9 | 98.84% | 98.14% | 97.60% | 97.35% | 96.73% | 96.06% | 94.44% |
| WES | A30C | 124489740 | 95.2% | 142.8 | 98.64% | 97.82% | 97.12% | 96.78% | 95.93% | 94.96% | 92.54% |
| WES | A31A | 161462578 | 87.9% | 148.4 | 96.98% | 93.11% | 89.27% | 87.65% | 83.91% | 80.41% | 74.05% |
| WES | A31C | 154114046 | 88.0% | 141.3 | 97.09% | 93.16% | 89.34% | 87.71% | 83.97% | 80.44% | 74.03% |
| WES | A32A | 213738708 | 99.0% | 273.6 | 98.91% | 98.37% | 97.99% | 97.83% | 97.43% | 96.98% | 95.95% |
| WES | A32C | 204173408 | 98.9% | 249.8 | 98.88% | 98.35% | 97.97% | 97.81% | 97.39% | 96.93% | 95.85% |
| WES | A33A | 145968264 | 98.9% | 181.3 | 98.80% | 98.11% | 97.58% | 97.34% | 96.73% | 96.08% | 94.55% |
| WES | A33C | 136711750 | 98.7% | 163.8 | 98.75% | 98.00% | 97.40% | 97.13% | 96.41% | 95.63% | 93.72% |
| WES | A34A | 167169230 | 98.9% | 200.2 | 98.91% | 98.24% | 97.75% | 97.53% | 97.01% | 96.47% | 95.23% |
| WES | A34C | 116367112 | 99.0% | 140.5 | 98.68% | 97.91% | 97.23% | 96.91% | 96.06% | 95.09% | 92.63% |
| WES | A35A | 78616902  | 97.7% | 130.5 | 98.81% | 97.99% | 97.21% | 96.83% | 95.81% | 94.62% | 91.67% |

|     |      |          |       |       |        |        |        |        |        |        |        |
|-----|------|----------|-------|-------|--------|--------|--------|--------|--------|--------|--------|
| WES | A35C | 83602298 | 97.3% | 138.6 | 98.87% | 98.12% | 97.42% | 97.08% | 96.19% | 95.15% | 92.58% |
| WES | A36A | 92210728 | 97.6% | 153.8 | 98.72% | 97.96% | 97.27% | 96.93% | 96.07% | 95.12% | 92.84% |
| WES | A36C | 82752590 | 97.6% | 138.8 | 98.78% | 98.02% | 97.33% | 96.99% | 96.09% | 95.05% | 92.47% |
| WES | A37A | 78489590 | 97.5% | 128.8 | 98.68% | 97.84% | 97.09% | 96.72% | 95.71% | 94.59% | 91.79% |
| WES | A37C | 56161204 | 97.1% | 95.8  | 98.57% | 97.62% | 96.51% | 95.91% | 94.22% | 92.20% | 87.03% |
| WES | A38A | 66015624 | 97.9% | 106.7 | 98.39% | 97.27% | 96.16% | 95.58% | 94.02% | 92.20% | 87.64% |
| WES | A38C | 59376424 | 97.4% | 94.0  | 98.17% | 96.90% | 95.46% | 94.72% | 92.61% | 90.14% | 84.02% |
| WES | A39A | 63618282 | 98.1% | 101.9 | 98.49% | 97.42% | 96.27% | 95.67% | 94.02% | 92.06% | 87.09% |
| WES | A39C | 71464030 | 98.3% | 124.3 | 98.55% | 97.72% | 96.91% | 96.53% | 95.53% | 94.39% | 91.52% |
| WES | A40A | 83226500 | 98.2% | 142.3 | 98.71% | 97.91% | 97.21% | 96.85% | 95.94% | 94.90% | 92.34% |
| WES | A40C | 62188496 | 97.6% | 98.9  | 98.19% | 96.93% | 95.53% | 94.80% | 92.76% | 90.37% | 84.53% |
| WES | A41A | 83013588 | 97.6% | 139.8 | 98.83% | 98.18% | 97.56% | 97.25% | 96.41% | 95.46% | 93.07% |
| WES | A41C | 89547250 | 97.1% | 129.8 | 99.06% | 98.24% | 97.56% | 97.23% | 96.29% | 95.21% | 92.44% |
| WES | A42A | 68869260 | 97.8% | 119.4 | 98.70% | 98.00% | 97.25% | 96.86% | 95.83% | 94.60% | 91.44% |
| WES | A42C | 77862764 | 96.1% | 124.8 | 98.84% | 98.13% | 97.45% | 97.11% | 96.17% | 95.07% | 92.27% |
| WES | A43A | 65518372 | 98.2% | 113.8 | 98.37% | 97.48% | 96.56% | 96.11% | 94.91% | 93.54% | 90.03% |
| WES | A43C | 87904502 | 96.0% | 148.4 | 98.86% | 98.27% | 97.71% | 97.42% | 96.67% | 95.83% | 93.72% |
| WES | A44A | 83833774 | 97.5% | 106.3 | 98.56% | 97.69% | 96.77% | 96.28% | 94.88% | 93.11% | 88.52% |
| WES | A44C | 77005250 | 95.9% | 89.6  | 98.53% | 97.34% | 96.17% | 95.56% | 93.79% | 91.62% | 86.06% |
| WES | A46A | 70483656 | 98.5% | 129.5 | 99.07% | 98.53% | 97.97% | 97.67% | 96.79% | 95.72% | 92.94% |
| WES | A46C | 62768777 | 96.5% | 112.7 | 98.98% | 98.37% | 97.66% | 97.25% | 96.11% | 94.77% | 91.35% |
| WES | A47A | 67388399 | 98.6% | 124.4 | 99.07% | 98.50% | 97.92% | 97.60% | 96.67% | 95.53% | 92.54% |
| WES | A47C | 78655755 | 98.5% | 144.7 | 99.11% | 98.58% | 98.07% | 97.80% | 97.06% | 96.16% | 93.89% |
| WES | A48A | 76950190 | 98.5% | 141.5 | 99.12% | 98.59% | 98.09% | 97.83% | 97.07% | 96.17% | 93.88% |
| WES | A48C | 71765543 | 98.4% | 132.0 | 99.08% | 98.53% | 97.97% | 97.67% | 96.82% | 95.77% | 93.06% |
| WES | A49A | 72807485 | 98.6% | 127.9 | 99.23% | 98.59% | 97.97% | 97.64% | 96.66% | 95.46% | 92.27% |
| WES | A49C | 73564325 | 98.2% | 130.6 | 99.23% | 98.64% | 98.09% | 97.81% | 96.98% | 95.98% | 93.31% |
| WES | A50A | 73606478 | 98.6% | 132.3 | 99.14% | 98.53% | 97.92% | 97.60% | 96.64% | 95.48% | 92.51% |
| WES | A50C | 84902170 | 98.4% | 155.5 | 99.15% | 98.60% | 98.12% | 97.87% | 97.18% | 96.37% | 94.37% |
| WES | A51A | 68549424 | 98.8% | 117.5 | 99.26% | 98.61% | 97.95% | 97.60% | 96.55% | 95.26% | 91.87% |
| WES | A51C | 66840256 | 97.2% | 120.1 | 99.12% | 98.51% | 97.82% | 97.44% | 96.35% | 95.05% | 91.83% |
| WES | A52A | 65980086 | 99.7% | 127.8 | 99.18% | 98.62% | 98.07% | 97.77% | 96.90% | 95.82% | 92.91% |
| WES | A52C | 69804434 | 99.8% | 137.1 | 99.19% | 98.71% | 98.26% | 98.02% | 97.30% | 96.43% | 94.11% |

|     |      |          |       |       |        |        |        |        |        |        |        |
|-----|------|----------|-------|-------|--------|--------|--------|--------|--------|--------|--------|
| WES | A53A | 54698928 | 99.8% | 107.0 | 99.07% | 98.53% | 97.97% | 97.65% | 96.66% | 95.39% | 91.84% |
| WES | A53C | 56350855 | 99.8% | 111.3 | 99.05% | 98.56% | 98.03% | 97.73% | 96.82% | 95.68% | 92.51% |
| WES | A54A | 58567908 | 99.8% | 121.1 | 98.99% | 98.44% | 97.87% | 97.56% | 96.67% | 95.58% | 92.72% |
| WES | A54C | 76366911 | 99.8% | 153.5 | 99.11% | 98.64% | 98.22% | 98.01% | 97.44% | 96.77% | 95.03% |
| WES | A55A | 70472274 | 99.8% | 145.4 | 99.02% | 98.47% | 97.91% | 97.62% | 96.81% | 95.89% | 93.57% |
| WES | A55C | 59211097 | 99.8% | 122.8 | 98.87% | 98.23% | 97.45% | 97.04% | 95.86% | 94.51% | 91.16% |
| WES | A56A | 54923109 | 99.8% | 109.4 | 99.16% | 98.63% | 98.07% | 97.75% | 96.75% | 95.48% | 91.97% |
| WES | A56C | 59790467 | 99.8% | 120.3 | 99.14% | 98.66% | 98.16% | 97.87% | 97.04% | 96.00% | 93.16% |
| WES | A57A | 68193178 | 99.7% | 136.1 | 99.05% | 98.56% | 98.11% | 97.87% | 97.18% | 96.34% | 94.13% |
| WES | A57C | 58807553 | 98.6% | 115.3 | 98.97% | 98.42% | 97.84% | 97.51% | 96.55% | 95.35% | 92.22% |
| WES | A58A | 64083319 | 99.6% | 128.0 | 99.22% | 98.73% | 98.27% | 98.03% | 97.29% | 96.35% | 93.81% |
| WES | A58C | 71460054 | 99.7% | 141.8 | 99.24% | 98.75% | 98.33% | 98.12% | 97.52% | 96.78% | 94.79% |
| WES | A59A | 70284672 | 99.7% | 140.6 | 99.23% | 98.74% | 98.31% | 98.09% | 97.44% | 96.65% | 94.56% |
| WES | A59C | 65749046 | 99.7% | 133.4 | 99.19% | 98.71% | 98.26% | 98.02% | 97.34% | 96.49% | 94.18% |
| WES | A60A | 65249105 | 99.8% | 130.5 | 99.11% | 98.62% | 98.18% | 97.96% | 97.29% | 96.45% | 94.16% |
| WES | A60C | 68691888 | 99.8% | 136.1 | 99.09% | 98.56% | 98.09% | 97.84% | 97.15% | 96.32% | 94.17% |
| WES | A61A | 61326459 | 99.8% | 122.8 | 99.16% | 98.62% | 98.09% | 97.80% | 96.93% | 95.81% | 92.76% |
| WES | A61C | 72223195 | 99.8% | 141.6 | 99.23% | 98.69% | 98.23% | 98.00% | 97.33% | 96.51% | 94.37% |
| WES | A62A | 56616376 | 99.8% | 109.7 | 99.19% | 98.69% | 98.17% | 97.87% | 96.98% | 95.81% | 92.60% |
| WES | A62C | 66170446 | 99.8% | 128.2 | 99.20% | 98.68% | 98.18% | 97.91% | 97.11% | 96.16% | 93.62% |
| WES | A63A | 56999055 | 99.8% | 110.7 | 99.23% | 98.66% | 98.13% | 97.84% | 96.95% | 95.79% | 92.60% |
| WES | A63C | 57517713 | 99.8% | 108.8 | 99.21% | 98.65% | 98.08% | 97.77% | 96.84% | 95.62% | 92.26% |
| WES | A64A | 60509101 | 99.8% | 116.9 | 99.21% | 98.70% | 98.20% | 97.93% | 97.12% | 96.09% | 93.25% |
| WES | A64C | 50086014 | 99.8% | 96.6  | 99.18% | 98.62% | 97.99% | 97.63% | 96.47% | 94.97% | 90.81% |
| WES | A65A | 55572883 | 99.8% | 110.6 | 99.14% | 98.59% | 98.02% | 97.70% | 96.72% | 95.48% | 92.05% |
| WES | A65C | 45026171 | 99.7% | 91.6  | 98.98% | 98.27% | 97.30% | 96.75% | 95.09% | 93.01% | 87.62% |
| WES | A66A | 41345124 | 99.8% | 89.4  | 98.51% | 97.50% | 96.06% | 95.28% | 93.06% | 90.53% | 84.54% |
| WES | A66C | 50504943 | 99.6% | 107.2 | 98.72% | 97.78% | 96.58% | 95.94% | 94.21% | 92.26% | 87.64% |
| WES | A67A | 64346857 | 99.9% | 124.9 | 99.24% | 98.76% | 98.32% | 98.09% | 97.41% | 96.54% | 94.15% |
| WES | A67C | 59228081 | 98.9% | 113.4 | 99.16% | 98.67% | 98.15% | 97.86% | 96.99% | 95.87% | 92.82% |
| WES | A68A | 47354150 | 99.8% | 96.6  | 98.94% | 98.31% | 97.56% | 97.14% | 95.88% | 94.29% | 89.97% |
| WES | A68C | 49202400 | 98.9% | 99.8  | 98.89% | 98.27% | 97.45% | 96.98% | 95.60% | 93.90% | 89.48% |
| WES | A70A | 76691922 | 99.7% | 148.0 | 99.16% | 98.68% | 98.28% | 98.09% | 97.58% | 96.94% | 95.27% |

|     |      |          |        |       |        |        |        |        |        |        |        |
|-----|------|----------|--------|-------|--------|--------|--------|--------|--------|--------|--------|
| WES | A70C | 64065304 | 99.7%  | 123.5 | 99.11% | 98.63% | 98.19% | 97.93% | 97.20% | 96.29% | 93.83% |
| WES | A71A | 59662344 | 99.7%  | 115.8 | 99.04% | 98.53% | 97.96% | 97.64% | 96.68% | 95.45% | 92.17% |
| WES | A71C | 58504980 | 99.5%  | 111.5 | 99.06% | 98.53% | 97.95% | 97.62% | 96.65% | 95.44% | 92.19% |
| WES | A72A | 58584181 | 99.9%  | 113.7 | 99.21% | 98.69% | 98.19% | 97.92% | 97.08% | 95.99% | 92.96% |
| WES | A72C | 59563810 | 99.2%  | 109.4 | 99.25% | 98.73% | 98.25% | 97.97% | 97.13% | 96.02% | 92.87% |
| WES | A73A | 75739154 | 99.9%  | 148.1 | 99.23% | 98.74% | 98.31% | 98.09% | 97.46% | 96.70% | 94.76% |
| WES | A73C | 74349712 | 99.4%  | 143.4 | 99.23% | 98.72% | 98.28% | 98.04% | 97.38% | 96.59% | 94.53% |
| WES | A74A | 64862618 | 99.8%  | 124.2 | 99.21% | 98.71% | 98.21% | 97.94% | 97.17% | 96.22% | 93.65% |
| WES | A74C | 63918727 | 99.2%  | 121.5 | 99.22% | 98.72% | 98.25% | 98.00% | 97.27% | 96.34% | 93.77% |
| WES | A75A | 69392546 | 99.8%  | 135.2 | 99.23% | 98.72% | 98.25% | 98.02% | 97.31% | 96.44% | 94.18% |
| WES | A75C | 62206397 | 99.2%  | 122.3 | 99.15% | 98.68% | 98.17% | 97.90% | 97.07% | 96.06% | 93.31% |
| WES | A76A | 42264045 | 100.0% | 109.6 | 98.88% | 98.45% | 97.91% | 97.61% | 96.73% | 95.61% | 92.47% |
| WES | A76C | 41747885 | 100.0% | 106.8 | 98.90% | 98.46% | 97.85% | 97.52% | 96.54% | 95.34% | 91.97% |
| WES | A77A | 66092712 | 99.8%  | 129.6 | 99.21% | 98.70% | 98.21% | 97.94% | 97.15% | 96.16% | 93.55% |
| WES | A77C | 66071145 | 99.8%  | 131.6 | 99.21% | 98.73% | 98.29% | 98.05% | 97.35% | 96.47% | 94.12% |
| WES | A78A | 61010177 | 99.9%  | 120.3 | 99.04% | 98.53% | 97.99% | 97.71% | 96.84% | 95.79% | 92.98% |
| WES | A78C | 74009182 | 99.7%  | 142.0 | 99.15% | 98.71% | 98.34% | 98.15% | 97.62% | 96.96% | 95.20% |
| WES | A79A | 61977712 | 99.5%  | 121.1 | 99.20% | 98.70% | 98.22% | 97.95% | 97.15% | 96.15% | 93.40% |
| WES | A79C | 68588896 | 99.8%  | 135.1 | 99.20% | 98.71% | 98.26% | 98.03% | 97.35% | 96.50% | 94.26% |
| WES | A81A | 45141847 | 99.9%  | 116.2 | 98.94% | 98.51% | 97.95% | 97.64% | 96.73% | 95.57% | 92.33% |
| WES | A81C | 44227241 | 99.7%  | 110.6 | 98.95% | 98.56% | 98.04% | 97.76% | 96.89% | 95.81% | 92.68% |
| WES | A82A | 54448786 | 99.8%  | 106.7 | 99.13% | 98.58% | 97.98% | 97.65% | 96.66% | 95.38% | 91.88% |
| WES | A82C | 53161767 | 99.5%  | 102.1 | 99.17% | 98.66% | 98.09% | 97.75% | 96.64% | 95.13% | 90.88% |
| WES | A83A | 67957302 | 99.9%  | 133.7 | 99.19% | 98.69% | 98.20% | 97.95% | 97.26% | 96.41% | 94.15% |
| WES | A83C | 55638838 | 99.3%  | 105.8 | 99.21% | 98.68% | 98.16% | 97.87% | 96.96% | 95.76% | 92.41% |
| WES | A84A | 40547080 | 100.0% | 104.2 | 99.06% | 98.61% | 98.01% | 97.70% | 96.73% | 95.54% | 92.08% |
| WES | A84C | 37227661 | 99.9%  | 94.7  | 99.07% | 98.59% | 97.94% | 97.58% | 96.45% | 95.00% | 90.78% |
| WES | A85A | 42910578 | 99.9%  | 108.4 | 99.03% | 98.53% | 97.90% | 97.54% | 96.47% | 95.17% | 91.59% |
| WES | A85C | 44450305 | 100.0% | 111.5 | 99.09% | 98.61% | 98.05% | 97.75% | 96.86% | 95.76% | 92.68% |
| WES | A86A | 41575581 | 99.9%  | 99.0  | 98.98% | 98.48% | 97.86% | 97.52% | 96.47% | 95.17% | 91.39% |
| WES | A86C | 46679860 | 99.9%  | 121.6 | 98.96% | 98.40% | 97.44% | 96.89% | 95.31% | 93.62% | 90.00% |
| WES | A87A | 43427610 | 99.9%  | 110.6 | 99.08% | 98.62% | 98.01% | 97.67% | 96.65% | 95.38% | 91.87% |
| WES | A87C | 43388500 | 99.9%  | 108.4 | 99.05% | 98.56% | 97.90% | 97.54% | 96.45% | 95.12% | 91.49% |

|     |       |           |       |       |        |        |        |        |        |        |        |
|-----|-------|-----------|-------|-------|--------|--------|--------|--------|--------|--------|--------|
| WES | A88A  | 48239049  | 99.9% | 124.7 | 98.97% | 98.54% | 98.04% | 97.77% | 96.99% | 96.09% | 93.58% |
| WES | A88C  | 47390298  | 99.8% | 120.9 | 98.90% | 98.45% | 97.86% | 97.54% | 96.63% | 95.58% | 92.72% |
| WES | A89A  | 42599922  | 99.9% | 101.9 | 98.90% | 98.38% | 97.68% | 97.30% | 96.17% | 94.78% | 90.91% |
| WES | A89C  | 43560843  | 99.8% | 103.2 | 98.94% | 98.50% | 97.93% | 97.62% | 96.71% | 95.54% | 92.16% |
| WES | A90A  | 42712081  | 99.8% | 100.3 | 98.90% | 98.36% | 97.69% | 97.32% | 96.23% | 94.84% | 91.00% |
| WES | A90C  | 41354720  | 99.1% | 96.2  | 98.91% | 98.38% | 97.71% | 97.35% | 96.27% | 94.86% | 90.87% |
| WES | A91A  | 64965849  | 99.8% | 128.2 | 99.14% | 98.68% | 98.23% | 98.01% | 97.33% | 96.48% | 94.10% |
| WES | A91C  | 66385263  | 99.2% | 131.5 | 99.10% | 98.63% | 98.21% | 97.98% | 97.31% | 96.47% | 94.22% |
| WES | A93A  | 57664070  | 99.8% | 113.7 | 99.21% | 98.68% | 98.14% | 97.84% | 96.93% | 95.75% | 92.50% |
| WES | A93C  | 66178068  | 98.4% | 128.6 | 99.22% | 98.77% | 98.32% | 98.09% | 97.39% | 96.54% | 94.17% |
| WES | A94A  | 43600553  | 99.9% | 103.7 | 98.91% | 98.38% | 97.71% | 97.33% | 96.20% | 94.78% | 90.90% |
| WES | A94C  | 38904410  | 99.9% | 92.3  | 98.84% | 98.24% | 97.40% | 96.93% | 95.51% | 93.75% | 88.87% |
| WES | A95A  | 47906214  | 99.9% | 111.8 | 98.89% | 98.34% | 97.64% | 97.26% | 96.17% | 94.85% | 91.29% |
| WES | A95C  | 45916190  | 99.1% | 100.3 | 98.83% | 98.25% | 97.47% | 97.04% | 95.79% | 94.32% | 90.39% |
| WES | AC04A | 89489842  | 87.9% | 95.0  | 96.41% | 91.85% | 87.94% | 86.27% | 82.33% | 78.64% | 71.93% |
| WES | AC04C | 95559896  | 89.4% | 99.3  | 96.28% | 91.60% | 87.58% | 85.87% | 81.80% | 78.02% | 71.30% |
| WES | AC06A | 112710490 | 84.9% | 92.2  | 95.73% | 90.29% | 85.57% | 83.53% | 78.87% | 74.74% | 67.83% |
| WES | AC06C | 127486576 | 75.6% | 85.5  | 93.30% | 85.86% | 79.39% | 76.72% | 71.18% | 66.85% | 60.33% |
| WES | AC09A | 169972158 | 87.2% | 169.4 | 97.00% | 94.05% | 91.09% | 89.81% | 86.88% | 84.07% | 78.59% |
| WES | AC09C | 164665216 | 88.8% | 168.8 | 96.64% | 93.26% | 89.90% | 88.47% | 85.20% | 82.13% | 76.45% |
| WES | AC10A | 73875194  | 91.4% | 95.1  | 98.34% | 96.67% | 94.66% | 93.57% | 90.52% | 87.16% | 79.78% |
| WES | AC10C | 91204740  | 89.4% | 109.3 | 98.23% | 96.52% | 94.47% | 93.37% | 90.39% | 87.17% | 80.28% |
| WES | AC11A | 98544760  | 89.9% | 113.8 | 98.27% | 96.71% | 95.01% | 94.16% | 91.92% | 89.53% | 84.31% |
| WES | AC11C | 100778188 | 89.8% | 110.7 | 98.31% | 96.61% | 94.69% | 93.72% | 91.15% | 88.43% | 82.59% |
| WES | AC14A | 125606834 | 99.0% | 157.0 | 98.80% | 98.11% | 97.53% | 97.25% | 96.55% | 95.78% | 93.90% |
| WES | AC14C | 120015730 | 98.9% | 149.6 | 98.78% | 98.07% | 97.44% | 97.13% | 96.34% | 95.46% | 93.30% |
| WES | AC16A | 65267962  | 97.6% | 104.3 | 98.48% | 97.20% | 95.67% | 94.87% | 92.59% | 89.97% | 83.83% |
| WES | AC16C | 71541254  | 98.0% | 117.7 | 98.71% | 97.75% | 96.78% | 96.30% | 94.98% | 93.43% | 89.58% |
| WES | B01A  | 135370194 | 98.9% | 138.3 | 97.75% | 94.87% | 91.94% | 90.66% | 87.71% | 85.00% | 79.94% |
| WES | B01C  | 59998202  | 98.6% | 103.4 | 96.66% | 93.81% | 90.67% | 89.29% | 86.09% | 82.99% | 76.74% |
| WES | B02A  | 110504486 | 99.1% | 88.3  | 96.57% | 91.83% | 87.21% | 85.18% | 80.57% | 76.36% | 68.66% |
| WES | B02C  | 91524598  | 99.2% | 144.1 | 96.23% | 94.71% | 92.59% | 91.62% | 89.38% | 87.27% | 83.11% |
| WES | B03A  | 89612668  | 98.9% | 199.3 | 96.41% | 93.19% | 90.95% | 89.98% | 87.72% | 85.54% | 81.30% |

|     |      |           |       |       |        |        |        |        |        |        |        |
|-----|------|-----------|-------|-------|--------|--------|--------|--------|--------|--------|--------|
| WES | B03C | 74649136  | 98.6% | 103.8 | 96.53% | 94.22% | 91.40% | 90.13% | 87.11% | 84.14% | 78.14% |
| WES | B04A | 107407478 | 98.8% | 109.0 | 93.83% | 88.38% | 83.60% | 81.49% | 76.77% | 72.74% | 66.10% |
| WES | B04C | 102755050 | 98.6% | 85.3  | 96.75% | 93.76% | 90.49% | 89.01% | 85.37% | 81.74% | 74.23% |
| WES | B06A | 57622802  | 99.1% | 79.7  | 97.47% | 94.60% | 91.42% | 89.96% | 86.47% | 82.98% | 75.50% |
| WES | B06C | 58110028  | 99.1% | 99.0  | 97.15% | 94.88% | 92.13% | 90.89% | 87.97% | 85.15% | 79.32% |
| WES | B12A | 58936250  | 99.0% | 78.6  | 97.59% | 94.28% | 90.77% | 89.20% | 85.44% | 81.67% | 73.61% |
| WES | B12C | 72517038  | 99.0% | 62.3  | 96.72% | 92.83% | 88.66% | 86.71% | 81.89% | 76.92% | 66.64% |
| WES | B13A | 92512322  | 98.8% | 64.9  | 96.85% | 93.00% | 88.88% | 86.99% | 82.35% | 77.57% | 67.79% |
| WES | B13C | 74247214  | 98.7% | 61.6  | 96.87% | 92.67% | 88.27% | 86.24% | 81.18% | 76.04% | 65.69% |
| WES | B15A | 80637650  | 98.9% | 106.4 | 96.35% | 94.01% | 91.25% | 90.01% | 87.02% | 84.10% | 78.23% |
| WES | B15C | 82288722  | 95.6% | 111.7 | 96.25% | 93.93% | 91.17% | 89.95% | 86.97% | 84.09% | 78.40% |
| WES | B16A | 96981670  | 98.1% | 78.1  | 96.64% | 93.46% | 89.94% | 88.35% | 84.47% | 80.58% | 72.52% |
| WES | B16C | 236382712 | 74.2% | 94.0  | 96.96% | 94.13% | 91.07% | 89.69% | 86.41% | 83.17% | 76.51% |
| WES | B17A | 134754804 | 98.3% | 97.7  | 97.21% | 94.59% | 91.68% | 90.37% | 87.32% | 84.32% | 78.14% |
| WES | B17C | 84661746  | 95.2% | 116.1 | 96.82% | 94.72% | 92.17% | 91.00% | 88.27% | 85.66% | 80.42% |
| WES | B18A | 84448692  | 98.9% | 64.1  | 97.11% | 93.58% | 89.70% | 87.91% | 83.41% | 78.68% | 68.84% |
| WES | B18C | 128215626 | 96.1% | 145.1 | 96.42% | 94.92% | 92.97% | 92.04% | 89.86% | 87.78% | 83.68% |
| WES | C01A | 103843616 | 85.0% | 102.4 | 96.17% | 91.52% | 87.57% | 85.89% | 82.00% | 78.37% | 71.86% |
| WES | C01C | 60482206  | 92.2% | 72.6  | 96.85% | 92.83% | 89.13% | 87.54% | 83.70% | 79.81% | 71.91% |
| WES | C02A | 102550382 | 84.5% | 87.1  | 96.05% | 91.08% | 86.74% | 84.84% | 80.35% | 76.21% | 68.93% |
| WES | C02C | 96655356  | 88.8% | 95.3  | 96.24% | 91.56% | 87.49% | 85.78% | 81.72% | 77.94% | 71.11% |
| WES | C03A | 97405696  | 89.1% | 82.1  | 96.23% | 91.14% | 86.62% | 84.64% | 79.92% | 75.55% | 67.82% |
| WES | C03C | 88372826  | 90.3% | 82.7  | 96.03% | 90.80% | 86.25% | 84.25% | 79.59% | 75.34% | 67.99% |
| WES | C05A | 111790356 | 86.2% | 88.6  | 95.70% | 90.40% | 85.78% | 83.74% | 78.99% | 74.75% | 67.63% |
| WES | C05C | 108239426 | 86.7% | 96.8  | 95.98% | 90.95% | 86.49% | 84.53% | 79.96% | 75.79% | 68.68% |
| WES | C07A | 111199230 | 86.7% | 124.8 | 95.59% | 90.25% | 85.79% | 83.88% | 79.52% | 75.65% | 69.33% |
| WES | C07C | 110659646 | 86.5% | 124.4 | 95.93% | 90.73% | 86.32% | 84.42% | 80.06% | 76.12% | 69.57% |
| WES | C08A | 112573216 | 81.0% | 102.4 | 94.52% | 88.61% | 83.24% | 80.86% | 75.49% | 70.99% | 64.01% |
| WES | C08C | 108399762 | 84.7% | 100.0 | 93.78% | 87.16% | 81.22% | 78.69% | 73.29% | 68.99% | 62.44% |
| WES | C12A | 150290740 | 89.2% | 140.9 | 97.14% | 93.38% | 89.76% | 88.20% | 84.52% | 80.99% | 74.50% |
| WES | C12C | 153265204 | 89.0% | 145.9 | 97.22% | 93.46% | 89.84% | 88.31% | 84.74% | 81.37% | 75.15% |
| WES | C13A | 166762904 | 98.6% | 207.8 | 98.16% | 96.96% | 95.78% | 95.24% | 93.99% | 92.81% | 90.61% |
| WES | C13C | 182887238 | 98.7% | 218.9 | 97.95% | 96.33% | 94.69% | 93.94% | 92.24% | 90.74% | 88.07% |

|     |      |           |       |       |        |        |        |        |        |        |        |
|-----|------|-----------|-------|-------|--------|--------|--------|--------|--------|--------|--------|
| WES | C15A | 148543742 | 99.0% | 187.4 | 98.59% | 97.97% | 97.42% | 97.16% | 96.52% | 95.84% | 94.26% |
| WES | C15C | 117418550 | 98.5% | 151.4 | 98.79% | 98.05% | 97.08% | 96.50% | 94.84% | 93.04% | 89.50% |
| WES | C17A | 70084932  | 98.4% | 119.7 | 98.56% | 97.60% | 96.70% | 96.25% | 95.03% | 93.57% | 89.87% |
| WES | C17C | 82607118  | 98.4% | 137.2 | 98.69% | 97.83% | 97.08% | 96.72% | 95.82% | 94.81% | 92.26% |
| WES | C18A | 71241326  | 92.9% | 108.4 | 98.50% | 97.45% | 96.40% | 95.87% | 94.44% | 92.73% | 88.45% |
| WES | C18C | 70384054  | 93.1% | 108.8 | 98.65% | 97.66% | 96.64% | 96.12% | 94.72% | 93.07% | 88.89% |
| WES | C19A | 60944450  | 93.0% | 95.8  | 98.47% | 97.35% | 96.10% | 95.46% | 93.64% | 91.49% | 86.07% |
| WES | C19C | 63592428  | 92.9% | 100.2 | 98.44% | 97.42% | 96.33% | 95.76% | 94.24% | 92.42% | 87.71% |
| WES | C20A | 64746198  | 92.7% | 101.1 | 98.27% | 97.10% | 95.86% | 95.23% | 93.50% | 91.48% | 86.43% |
| WES | C20C | 62010152  | 92.8% | 98.6  | 98.38% | 97.27% | 96.15% | 95.55% | 93.91% | 91.98% | 87.00% |
| WES | C21A | 76408552  | 92.5% | 119.5 | 98.48% | 97.49% | 96.53% | 96.05% | 94.78% | 93.33% | 89.69% |
| WES | C21C | 106218570 | 92.8% | 163.7 | 98.68% | 97.86% | 97.15% | 96.82% | 95.99% | 95.09% | 92.99% |
| WES | C22A | 49472504  | 99.2% | 70.7  | 98.53% | 97.32% | 95.85% | 95.02% | 92.43% | 89.08% | 80.47% |
| WES | C22C | 53900010  | 99.2% | 78.3  | 98.52% | 97.45% | 96.26% | 95.61% | 93.60% | 91.02% | 84.06% |
| WES | C23A | 74455672  | 97.9% | 132.9 | 98.55% | 97.69% | 96.89% | 96.51% | 95.51% | 94.36% | 91.45% |
| WES | C23C | 79457536  | 98.1% | 141.8 | 98.69% | 97.90% | 97.23% | 96.92% | 96.09% | 95.17% | 92.89% |
| WES | C24A | 83052482  | 96.3% | 120.3 | 99.11% | 98.07% | 97.12% | 96.65% | 95.39% | 93.94% | 90.34% |
| WES | C24C | 71983646  | 97.3% | 121.2 | 98.94% | 98.12% | 97.31% | 96.90% | 95.78% | 94.48% | 91.13% |
| WES | C25A | 86073884  | 98.0% | 151.3 | 98.88% | 98.13% | 97.47% | 97.16% | 96.36% | 95.47% | 93.29% |
| WES | C25C | 79613832  | 96.9% | 141.6 | 98.82% | 98.01% | 97.28% | 96.93% | 96.02% | 95.00% | 92.45% |
| WES | C26A | 82493900  | 98.0% | 146.7 | 98.91% | 98.16% | 97.47% | 97.16% | 96.30% | 95.35% | 92.97% |
| WES | C26C | 76538668  | 98.4% | 140.2 | 98.85% | 98.08% | 97.40% | 97.08% | 96.20% | 95.22% | 92.74% |
| WES | C27A | 67760494  | 96.8% | 111.7 | 98.76% | 97.84% | 96.87% | 96.36% | 95.00% | 93.40% | 89.37% |
| WES | C27C | 73132540  | 97.1% | 121.9 | 98.85% | 98.02% | 97.16% | 96.73% | 95.59% | 94.28% | 90.98% |
| WES | C28A | 61974336  | 97.0% | 106.8 | 98.78% | 97.85% | 96.81% | 96.27% | 94.79% | 93.01% | 88.53% |
| WES | C28C | 82027190  | 97.4% | 141.5 | 98.97% | 98.18% | 97.42% | 97.05% | 96.07% | 94.98% | 92.30% |
| WES | C29A | 76334858  | 97.9% | 137.0 | 98.84% | 98.15% | 97.50% | 97.18% | 96.30% | 95.30% | 92.81% |
| WES | C29C | 81727336  | 98.3% | 140.7 | 98.88% | 98.15% | 97.50% | 97.17% | 96.32% | 95.35% | 92.96% |
| WES | C30A | 71223118  | 98.2% | 123.6 | 98.85% | 98.13% | 97.44% | 97.10% | 96.16% | 95.04% | 92.11% |
| WES | C30C | 80221558  | 98.3% | 139.9 | 98.83% | 98.10% | 97.43% | 97.11% | 96.25% | 95.27% | 92.82% |
| WES | C31A | 72475826  | 98.0% | 126.3 | 98.84% | 98.08% | 97.34% | 96.97% | 95.95% | 94.73% | 91.63% |
| WES | C31C | 68642542  | 98.3% | 119.5 | 98.85% | 98.11% | 97.35% | 96.94% | 95.84% | 94.57% | 91.22% |
| WES | C32A | 67634680  | 98.2% | 118.0 | 98.81% | 98.16% | 97.53% | 97.18% | 96.21% | 95.02% | 91.89% |

|     |      |          |       |       |        |        |        |        |        |        |        |
|-----|------|----------|-------|-------|--------|--------|--------|--------|--------|--------|--------|
| WES | C32C | 71443552 | 98.1% | 119.8 | 98.84% | 98.17% | 97.50% | 97.15% | 96.18% | 95.02% | 91.93% |
| WES | C33A | 69568680 | 98.1% | 119.2 | 98.92% | 98.21% | 97.51% | 97.14% | 96.11% | 94.86% | 91.61% |
| WES | C33C | 70656512 | 98.1% | 123.3 | 98.89% | 98.22% | 97.50% | 97.14% | 96.12% | 94.89% | 91.79% |
| WES | C34A | 72424872 | 97.8% | 122.5 | 98.76% | 97.97% | 97.22% | 96.84% | 95.79% | 94.56% | 91.44% |
| WES | C34C | 79631866 | 98.2% | 136.2 | 98.82% | 98.16% | 97.53% | 97.19% | 96.29% | 95.25% | 92.68% |
| WES | C35A | 84651776 | 98.3% | 144.2 | 98.96% | 98.26% | 97.62% | 97.28% | 96.39% | 95.38% | 92.88% |
| WES | C35C | 82386614 | 98.2% | 139.1 | 98.93% | 98.23% | 97.55% | 97.20% | 96.27% | 95.20% | 92.55% |
| WES | C36A | 74508318 | 98.3% | 126.7 | 98.88% | 98.17% | 97.43% | 97.04% | 95.96% | 94.68% | 91.45% |
| WES | C36C | 88234634 | 98.1% | 147.5 | 99.03% | 98.39% | 97.80% | 97.51% | 96.69% | 95.77% | 93.49% |
| WES | C37A | 75460284 | 98.4% | 123.3 | 98.85% | 98.12% | 97.37% | 96.98% | 95.92% | 94.68% | 91.51% |
| WES | C37C | 83279860 | 98.2% | 143.6 | 98.88% | 98.27% | 97.68% | 97.38% | 96.57% | 95.63% | 93.35% |
| WES | C38A | 70696198 | 98.2% | 122.3 | 98.73% | 97.94% | 97.12% | 96.71% | 95.56% | 94.23% | 90.89% |
| WES | C38C | 79907134 | 97.9% | 135.5 | 98.76% | 98.11% | 97.47% | 97.16% | 96.29% | 95.27% | 92.71% |
| WES | C39A | 78611244 | 98.1% | 133.6 | 98.62% | 97.89% | 97.13% | 96.75% | 95.73% | 94.56% | 91.65% |
| WES | C39C | 79735722 | 97.9% | 135.2 | 98.74% | 98.07% | 97.43% | 97.12% | 96.29% | 95.33% | 92.87% |
| WES | C40A | 59189888 | 98.0% | 97.5  | 98.78% | 97.91% | 97.01% | 96.53% | 95.15% | 93.42% | 88.81% |
| WES | C40C | 72114230 | 98.2% | 123.7 | 98.89% | 98.18% | 97.50% | 97.15% | 96.20% | 95.07% | 92.15% |
| WES | C41A | 65950414 | 98.0% | 111.7 | 98.60% | 97.82% | 97.08% | 96.71% | 95.65% | 94.37% | 90.95% |
| WES | C41C | 70782932 | 98.1% | 123.6 | 98.56% | 97.78% | 97.02% | 96.65% | 95.65% | 94.50% | 91.57% |
| WES | C43A | 73699323 | 99.6% | 142.9 | 99.23% | 98.78% | 98.39% | 98.19% | 97.62% | 96.94% | 95.09% |
| WES | C43C | 89392912 | 99.7% | 168.9 | 99.36% | 98.91% | 98.58% | 98.43% | 98.04% | 97.55% | 96.28% |
| WES | C44A | 80395521 | 99.6% | 155.0 | 99.13% | 98.69% | 98.33% | 98.16% | 97.68% | 97.11% | 95.56% |
| WES | C44C | 71880146 | 99.6% | 135.8 | 99.18% | 98.67% | 98.27% | 98.06% | 97.46% | 96.71% | 94.70% |
| WES | C45A | 67738987 | 99.6% | 131.6 | 99.13% | 98.67% | 98.28% | 98.09% | 97.51% | 96.78% | 94.73% |
| WES | C45C | 68661416 | 99.5% | 132.1 | 99.13% | 98.67% | 98.29% | 98.08% | 97.49% | 96.74% | 94.66% |
| WES | C46A | 75715523 | 99.6% | 146.5 | 99.17% | 98.69% | 98.32% | 98.14% | 97.61% | 96.97% | 95.27% |
| WES | C46C | 73701702 | 99.5% | 142.0 | 99.16% | 98.70% | 98.33% | 98.14% | 97.61% | 96.96% | 95.18% |
| WES | C47A | 63187183 | 99.9% | 124.7 | 99.21% | 98.76% | 98.35% | 98.12% | 97.48% | 96.68% | 94.39% |
| WES | C47C | 73747351 | 99.9% | 144.2 | 99.27% | 98.83% | 98.49% | 98.31% | 97.82% | 97.21% | 95.57% |
| WES | C48A | 60947659 | 99.9% | 122.8 | 99.15% | 98.70% | 98.27% | 98.03% | 97.33% | 96.44% | 94.01% |
| WES | C48C | 65316382 | 99.9% | 126.8 | 99.23% | 98.78% | 98.41% | 98.22% | 97.64% | 96.90% | 94.79% |
| WES | C49A | 62274724 | 99.9% | 123.2 | 99.23% | 98.79% | 98.39% | 98.17% | 97.52% | 96.69% | 94.35% |
| WES | C49C | 60575129 | 99.9% | 118.6 | 99.22% | 98.76% | 98.35% | 98.14% | 97.45% | 96.58% | 94.05% |



|     |      |          |       |       |        |        |        |        |        |        |        |
|-----|------|----------|-------|-------|--------|--------|--------|--------|--------|--------|--------|
| WES | C51A | 92100499 | 99.7% | 179.2 | 99.29% | 98.85% | 98.52% | 98.36% | 97.94% | 97.42% | 96.07% |
| WES | C51C | 65596676 | 99.9% | 126.8 | 99.25% | 98.78% | 98.36% | 98.15% | 97.51% | 96.72% | 94.48% |
| WES | C54A | 67710125 | 99.9% | 132.8 | 99.10% | 98.67% | 98.30% | 98.10% | 97.52% | 96.80% | 94.82% |
| WES | C54C | 70932105 | 99.7% | 139.2 | 99.11% | 98.69% | 98.33% | 98.14% | 97.61% | 96.96% | 95.18% |
| WES | C55A | 69853525 | 99.9% | 136.0 | 99.10% | 98.67% | 98.29% | 98.09% | 97.50% | 96.77% | 94.70% |
| WES | C55C | 70608517 | 99.9% | 136.6 | 99.17% | 98.68% | 98.30% | 98.12% | 97.57% | 96.89% | 95.05% |
| WES | C56A | 85028467 | 99.7% | 167.8 | 99.21% | 98.76% | 98.35% | 98.14% | 97.58% | 96.89% | 95.11% |
| WES | C56C | 67070271 | 99.9% | 128.5 | 99.24% | 98.74% | 98.32% | 98.10% | 97.44% | 96.61% | 94.29% |
| WES | C57A | 54147237 | 99.8% | 105.2 | 99.22% | 98.73% | 98.23% | 97.97% | 97.15% | 96.02% | 92.77% |
| WES | C57C | 70304883 | 99.9% | 131.4 | 99.34% | 98.83% | 98.45% | 98.27% | 97.72% | 96.99% | 94.93% |
| WES | C58A | 62391545 | 99.8% | 117.4 | 99.14% | 98.60% | 98.11% | 97.84% | 97.01% | 95.95% | 93.07% |
| WES | C58C | 82015214 | 99.5% | 160.9 | 99.12% | 98.70% | 98.35% | 98.18% | 97.70% | 97.12% | 95.60% |
| WES | C59A | 68707790 | 99.9% | 128.1 | 99.29% | 98.78% | 98.33% | 98.09% | 97.40% | 96.53% | 94.14% |
| WES | C59C | 63058371 | 99.9% | 124.4 | 99.24% | 98.77% | 98.36% | 98.14% | 97.48% | 96.64% | 94.29% |
| WES | C61A | 76223610 | 99.9% | 144.8 | 99.31% | 98.82% | 98.44% | 98.25% | 97.71% | 97.05% | 95.23% |
| WES | C61C | 74350512 | 99.8% | 141.3 | 99.32% | 98.84% | 98.50% | 98.34% | 97.90% | 97.32% | 95.67% |
| WES | C63A | 66634270 | 99.9% | 129.3 | 99.27% | 98.79% | 98.38% | 98.17% | 97.54% | 96.73% | 94.44% |
| WES | C63C | 75353669 | 99.9% | 145.8 | 99.26% | 98.80% | 98.40% | 98.19% | 97.61% | 96.88% | 94.94% |
| WES | C64A | 62545546 | 99.9% | 119.6 | 99.24% | 98.73% | 98.25% | 97.99% | 97.16% | 96.12% | 93.17% |
| WES | C64C | 90742053 | 99.7% | 176.7 | 99.32% | 98.88% | 98.55% | 98.40% | 97.97% | 97.47% | 96.17% |
| WES | C65A | 92121215 | 99.8% | 179.3 | 99.22% | 98.77% | 98.46% | 98.31% | 97.90% | 97.40% | 96.07% |
| WES | C65C | 68671339 | 99.9% | 137.1 | 99.09% | 98.64% | 98.28% | 98.09% | 97.54% | 96.87% | 95.05% |
| WES | C66A | 78635299 | 99.8% | 154.9 | 99.26% | 98.80% | 98.44% | 98.27% | 97.77% | 97.17% | 95.61% |
| WES | C66C | 62738268 | 99.8% | 125.2 | 99.17% | 98.67% | 98.22% | 97.99% | 97.29% | 96.39% | 93.93% |
| WES | C67A | 78514652 | 99.8% | 155.8 | 99.28% | 98.82% | 98.47% | 98.30% | 97.83% | 97.25% | 95.70% |
| WES | C67C | 64685635 | 99.7% | 125.3 | 99.23% | 98.74% | 98.29% | 98.06% | 97.36% | 96.47% | 94.04% |
| WES | C68A | 63243322 | 99.6% | 125.0 | 99.11% | 98.64% | 98.24% | 98.01% | 97.36% | 96.53% | 94.23% |
| WES | C68C | 60949694 | 99.7% | 117.1 | 99.18% | 98.64% | 98.17% | 97.93% | 97.20% | 96.25% | 93.63% |
| WES | C69A | 65608776 | 99.8% | 129.5 | 99.22% | 98.74% | 98.27% | 98.02% | 97.30% | 96.38% | 93.95% |
| WES | C69C | 63893862 | 99.7% | 124.7 | 99.21% | 98.73% | 98.26% | 98.02% | 97.30% | 96.39% | 93.90% |
| WES | C70A | 61529780 | 99.8% | 121.1 | 99.17% | 98.68% | 98.18% | 97.91% | 97.09% | 96.05% | 93.26% |
| WES | C70C | 57597417 | 99.6% | 113.5 | 99.06% | 98.56% | 98.06% | 97.79% | 96.97% | 95.92% | 92.99% |
| WES | C71A | 68482426 | 99.8% | 132.3 | 99.15% | 98.67% | 98.25% | 98.04% | 97.40% | 96.58% | 94.37% |

|     |      |          |       |       |        |        |        |        |        |        |        |
|-----|------|----------|-------|-------|--------|--------|--------|--------|--------|--------|--------|
| WES | C71C | 69230596 | 99.7% | 136.3 | 99.25% | 98.78% | 98.36% | 98.14% | 97.50% | 96.71% | 94.55% |
| WES | C72A | 54217802 | 99.7% | 106.8 | 99.06% | 98.56% | 98.03% | 97.73% | 96.80% | 95.56% | 92.06% |
| WES | C72C | 92368756 | 99.7% | 183.1 | 99.14% | 98.73% | 98.43% | 98.29% | 97.90% | 97.46% | 96.35% |
| WES | C73A | 61497526 | 99.6% | 119.8 | 99.15% | 98.60% | 98.05% | 97.73% | 96.78% | 95.62% | 92.47% |
| WES | C73C | 52783645 | 99.7% | 104.1 | 99.15% | 98.61% | 98.05% | 97.74% | 96.74% | 95.45% | 91.79% |
| WES | C74A | 60995138 | 99.7% | 120.0 | 99.07% | 98.57% | 98.06% | 97.76% | 96.86% | 95.71% | 92.59% |
| WES | C74C | 70954311 | 99.7% | 139.1 | 99.12% | 98.65% | 98.25% | 98.03% | 97.40% | 96.63% | 94.63% |
| WES | C75A | 42473294 | 99.6% | 83.4  | 98.96% | 98.28% | 97.40% | 96.87% | 95.21% | 93.03% | 87.01% |
| WES | C75C | 66771749 | 99.7% | 129.5 | 99.12% | 98.64% | 98.22% | 98.00% | 97.38% | 96.60% | 94.48% |
| WES | C76A | 56942643 | 99.7% | 113.2 | 99.04% | 98.58% | 98.10% | 97.83% | 97.03% | 95.96% | 93.03% |
| WES | C76C | 68768658 | 99.9% | 133.8 | 99.13% | 98.66% | 98.25% | 98.04% | 97.41% | 96.63% | 94.57% |
| WES | C77A | 74294786 | 99.7% | 146.5 | 99.26% | 98.80% | 98.44% | 98.24% | 97.70% | 97.05% | 95.29% |
| WES | C77C | 69990010 | 99.7% | 138.3 | 99.25% | 98.79% | 98.40% | 98.21% | 97.64% | 96.93% | 95.02% |
| WES | C78A | 55305757 | 99.7% | 107.4 | 99.23% | 98.69% | 98.17% | 97.86% | 96.92% | 95.68% | 92.24% |
| WES | C78C | 61610692 | 99.8% | 120.8 | 99.22% | 98.70% | 98.20% | 97.93% | 97.14% | 96.12% | 93.37% |
| WES | C79A | 60180600 | 99.7% | 119.5 | 99.20% | 98.72% | 98.23% | 97.96% | 97.18% | 96.16% | 93.37% |
| WES | C79C | 70504110 | 99.8% | 142.6 | 99.21% | 98.77% | 98.40% | 98.21% | 97.69% | 97.04% | 95.29% |
| WES | C80A | 65611854 | 99.6% | 130.4 | 99.23% | 98.74% | 98.33% | 98.12% | 97.50% | 96.71% | 94.50% |
| WES | C80C | 62297592 | 99.8% | 123.5 | 99.18% | 98.69% | 98.24% | 97.98% | 97.23% | 96.29% | 93.72% |
| WES | C81A | 59561870 | 99.8% | 118.7 | 99.14% | 98.65% | 98.13% | 97.86% | 97.02% | 95.96% | 93.07% |
| WES | C81C | 72847279 | 99.7% | 143.3 | 99.26% | 98.81% | 98.46% | 98.29% | 97.81% | 97.19% | 95.48% |
| WES | C82A | 73048017 | 99.7% | 144.2 | 99.27% | 98.83% | 98.47% | 98.30% | 97.82% | 97.20% | 95.49% |
| WES | C82C | 58989000 | 99.8% | 117.9 | 99.16% | 98.67% | 98.20% | 97.95% | 97.17% | 96.16% | 93.39% |
| WES | C83A | 67407818 | 99.7% | 133.6 | 99.11% | 98.66% | 98.28% | 98.09% | 97.52% | 96.79% | 94.84% |
| WES | C83C | 39642967 | 99.6% | 76.7  | 99.00% | 98.33% | 97.45% | 96.90% | 95.21% | 92.94% | 86.53% |
| WES | C84A | 64554664 | 99.8% | 128.7 | 99.22% | 98.73% | 98.29% | 98.06% | 97.38% | 96.53% | 94.27% |
| WES | C84C | 71273851 | 99.8% | 143.7 | 99.18% | 98.72% | 98.33% | 98.13% | 97.54% | 96.82% | 94.92% |
| WES | C85A | 68403833 | 99.7% | 130.4 | 99.19% | 98.67% | 98.21% | 97.98% | 97.31% | 96.51% | 94.31% |
| WES | C85C | 58135164 | 99.7% | 115.2 | 99.09% | 98.59% | 98.12% | 97.86% | 97.08% | 96.08% | 93.30% |
| WES | C86A | 53267091 | 99.8% | 105.5 | 99.14% | 98.63% | 98.09% | 97.79% | 96.88% | 95.69% | 92.28% |
| WES | C86C | 69605502 | 99.7% | 133.4 | 99.28% | 98.82% | 98.43% | 98.24% | 97.68% | 96.96% | 94.99% |
| WES | C87A | 59663167 | 99.6% | 120.0 | 99.07% | 98.58% | 98.15% | 97.90% | 97.16% | 96.24% | 93.65% |
| WES | C87C | 75392107 | 99.8% | 150.5 | 99.12% | 98.67% | 98.29% | 98.10% | 97.56% | 96.89% | 95.17% |

|     |       |          |       |       |        |        |        |        |        |        |        |
|-----|-------|----------|-------|-------|--------|--------|--------|--------|--------|--------|--------|
| WES | C88A  | 72862739 | 99.7% | 145.4 | 99.26% | 98.82% | 98.46% | 98.28% | 97.78% | 97.14% | 95.40% |
| WES | C88C  | 73703593 | 99.7% | 145.9 | 99.25% | 98.81% | 98.44% | 98.26% | 97.72% | 97.07% | 95.33% |
| WES | C89A  | 73958187 | 99.7% | 146.4 | 99.12% | 98.68% | 98.32% | 98.14% | 97.64% | 97.01% | 95.33% |
| WES | C89C  | 68444853 | 99.8% | 136.2 | 99.10% | 98.66% | 98.30% | 98.11% | 97.58% | 96.89% | 94.95% |
| WES | C90A  | 43560152 | 99.8% | 106.7 | 99.01% | 98.49% | 97.82% | 97.48% | 96.49% | 95.23% | 91.84% |
| WES | C90C  | 58658806 | 99.8% | 117.2 | 99.22% | 98.77% | 98.34% | 98.11% | 97.39% | 96.44% | 93.79% |
| WES | C91A  | 42091996 | 99.8% | 103.0 | 99.00% | 98.49% | 97.87% | 97.52% | 96.47% | 95.14% | 91.44% |
| WES | C91C  | 62097179 | 99.8% | 125.7 | 99.13% | 98.70% | 98.29% | 98.07% | 97.38% | 96.51% | 94.15% |
| WES | C92A  | 59904637 | 99.8% | 120.4 | 99.19% | 98.71% | 98.24% | 97.98% | 97.19% | 96.17% | 93.36% |
| WES | C92C  | 65771254 | 99.8% | 134.2 | 99.20% | 98.73% | 98.26% | 98.01% | 97.28% | 96.41% | 94.12% |
| WES | C93A  | 43461081 | 99.8% | 106.5 | 98.87% | 98.34% | 97.65% | 97.28% | 96.24% | 94.94% | 91.43% |
| WES | C93C  | 79712263 | 99.8% | 160.7 | 99.13% | 98.71% | 98.40% | 98.25% | 97.83% | 97.33% | 95.99% |
| WES | C94A  | 42611367 | 99.8% | 104.2 | 98.88% | 98.38% | 97.73% | 97.38% | 96.34% | 95.04% | 91.44% |
| WES | C94C  | 58929405 | 99.8% | 118.6 | 99.05% | 98.60% | 98.20% | 97.99% | 97.34% | 96.51% | 94.14% |
| WES | C95A  | 41220507 | 99.8% | 100.1 | 98.99% | 98.48% | 97.82% | 97.45% | 96.34% | 94.94% | 90.97% |
| WES | C95C  | 72480238 | 99.8% | 146.6 | 99.18% | 98.76% | 98.40% | 98.22% | 97.69% | 97.05% | 95.31% |
| WES | C96A  | 49050655 | 99.8% | 119.4 | 99.07% | 98.55% | 97.94% | 97.63% | 96.72% | 95.62% | 92.69% |
| WES | C96C  | 56723519 | 99.8% | 111.6 | 99.20% | 98.74% | 98.27% | 98.00% | 97.18% | 96.11% | 93.08% |
| WES | C97A  | 53687333 | 99.8% | 109.0 | 99.13% | 98.71% | 98.26% | 98.01% | 97.24% | 96.21% | 93.27% |
| WES | C97C  | 74070299 | 99.9% | 151.3 | 99.21% | 98.79% | 98.43% | 98.25% | 97.74% | 97.13% | 95.49% |
| WES | C98A  | 59704841 | 99.8% | 123.4 | 99.00% | 98.59% | 98.17% | 97.94% | 97.25% | 96.36% | 93.88% |
| WES | C98C  | 58165540 | 99.8% | 114.7 | 99.12% | 98.64% | 98.21% | 97.98% | 97.25% | 96.29% | 93.61% |
| WES | C99A  | 63863475 | 99.8% | 131.7 | 99.05% | 98.60% | 98.22% | 98.02% | 97.43% | 96.69% | 94.71% |
| WES | C99C  | 67988137 | 99.8% | 137.3 | 99.08% | 98.67% | 98.34% | 98.17% | 97.67% | 97.03% | 95.30% |
| WES | C100A | 68436070 | 99.8% | 139.8 | 99.17% | 98.78% | 98.41% | 98.21% | 97.65% | 96.93% | 94.98% |
| WES | C100C | 70770937 | 99.9% | 143.1 | 99.25% | 98.84% | 98.48% | 98.30% | 97.77% | 97.09% | 95.25% |
| WES | C101A | 71789490 | 99.8% | 146.4 | 99.17% | 98.76% | 98.42% | 98.24% | 97.74% | 97.11% | 95.44% |
| WES | C101C | 52953889 | 99.8% | 106.0 | 99.14% | 98.67% | 98.18% | 97.89% | 97.01% | 95.83% | 92.51% |
| WES | C102A | 56278593 | 99.8% | 114.0 | 99.13% | 98.69% | 98.25% | 98.01% | 97.24% | 96.23% | 93.35% |
| WES | C102C | 63081686 | 99.8% | 127.9 | 99.18% | 98.74% | 98.34% | 98.12% | 97.48% | 96.64% | 94.35% |
| WES | CA69A | 73429586 | 99.8% | 141.6 | 99.13% | 98.62% | 98.21% | 97.99% | 97.36% | 96.58% | 94.60% |
| WES | CA69C | 79259753 | 99.7% | 150.5 | 99.19% | 98.70% | 98.32% | 98.13% | 97.61% | 96.99% | 95.35% |
| WES | CA80A | 42819659 | 99.9% | 109.4 | 98.88% | 98.40% | 97.75% | 97.40% | 96.38% | 95.13% | 91.70% |

|          |       |           |       |       |        |        |        |        |        |        |        |
|----------|-------|-----------|-------|-------|--------|--------|--------|--------|--------|--------|--------|
| WES      | CA80C | 44020509  | 99.9% | 112.5 | 98.93% | 98.49% | 97.96% | 97.67% | 96.82% | 95.77% | 92.83% |
| WES      | CA92A | 64823553  | 99.8% | 127.6 | 99.10% | 98.60% | 98.17% | 97.94% | 97.27% | 96.42% | 94.11% |
| WES      | CA92C | 58458151  | 95.7% | 110.5 | 99.00% | 98.51% | 97.97% | 97.67% | 96.77% | 95.63% | 92.48% |
| mRNA-seq | A03   | 40421034  | 82.7% | 55.6  | 74.54% | 66.94% | 53.13% | 51.18% | 46.99% | 43.23% | 36.56% |
| mRNA-seq | A04   | 42712936  | 88.3% | 68.4  | 66.11% | 61.14% | 51.45% | 49.58% | 45.55% | 42.05% | 36.18% |
| mRNA-seq | A05   | 43637252  | 82.9% | 66.1  | 76.96% | 69.15% | 54.62% | 52.66% | 48.58% | 45.07% | 39.09% |
| mRNA-seq | A08   | 51979920  | 97.0% | 12.4  | 50.07% | 39.86% | 17.17% | 14.25% | 9.90%  | 7.47%  | 4.96%  |
| mRNA-seq | A09   | 44527942  | 97.1% | 33.6  | 66.29% | 60.77% | 46.38% | 43.00% | 35.81% | 29.99% | 21.73% |
| mRNA-seq | A10   | 69120423  | 96.4% | 75.5  | 70.33% | 65.63% | 56.32% | 54.59% | 50.98% | 47.90% | 42.40% |
| mRNA-seq | A13   | 50983045  | 97.3% | 45.9  | 66.63% | 61.27% | 48.43% | 45.50% | 39.36% | 34.31% | 26.42% |
| mRNA-seq | A14   | 48031004  | 96.5% | 62.4  | 71.08% | 66.13% | 56.02% | 54.06% | 49.80% | 45.96% | 39.25% |
| mRNA-seq | A15   | 34832751  | 77.1% | 76.0  | 71.29% | 63.55% | 50.10% | 48.24% | 44.20% | 40.73% | 34.85% |
| mRNA-seq | A16   | 64445657  | 96.8% | 62.2  | 68.02% | 63.20% | 53.39% | 51.43% | 47.20% | 43.45% | 36.89% |
| mRNA-seq | A17   | 48214587  | 96.7% | 48.6  | 65.30% | 59.72% | 48.29% | 45.92% | 40.84% | 36.52% | 29.49% |
| mRNA-seq | A18   | 85008860  | 96.5% | 113.9 | 72.03% | 67.52% | 58.82% | 57.44% | 54.77% | 52.55% | 48.65% |
| mRNA-seq | A19   | 100995362 | 97.1% | 114.7 | 69.51% | 64.78% | 55.53% | 53.93% | 50.65% | 47.89% | 43.14% |
| mRNA-seq | A20   | 41290499  | 78.5% | 64.7  | 61.29% | 57.12% | 49.01% | 47.28% | 43.50% | 40.31% | 35.01% |
| mRNA-seq | A21   | 71409114  | 97.0% | 94.7  | 73.69% | 68.47% | 57.50% | 55.44% | 51.10% | 47.47% | 41.38% |
| mRNA-seq | A22   | 51481748  | 93.3% | 57.7  | 69.98% | 65.28% | 55.44% | 53.53% | 49.32% | 45.56% | 38.75% |
| mRNA-seq | A23   | 38149352  | 97.2% | 46.2  | 65.90% | 61.07% | 50.07% | 47.60% | 42.18% | 37.54% | 29.83% |
| mRNA-seq | A25   | 46187213  | 92.3% | 42.9  | 65.67% | 60.39% | 47.59% | 44.92% | 39.27% | 34.58% | 27.31% |
| mRNA-seq | A26   | 49036403  | 96.9% | 51.6  | 66.35% | 61.31% | 50.68% | 48.41% | 43.41% | 38.90% | 31.27% |
| mRNA-seq | A27   | 32858427  | 82.6% | 68.4  | 72.83% | 65.65% | 53.14% | 51.27% | 47.13% | 43.39% | 36.77% |
| mRNA-seq | A28   | 53109630  | 96.6% | 42.2  | 68.23% | 62.31% | 48.62% | 45.70% | 39.49% | 34.24% | 26.15% |
| mRNA-seq | A30   | 44714864  | 89.1% | 64.6  | 68.99% | 64.29% | 53.14% | 50.84% | 45.91% | 41.76% | 35.11% |
| mRNA-seq | A31   | 48862959  | 93.4% | 35.6  | 67.99% | 62.24% | 48.16% | 45.17% | 38.82% | 33.60% | 25.69% |
| mRNA-seq | A32   | 45937235  | 91.0% | 29.1  | 68.29% | 62.81% | 48.09% | 44.97% | 38.31% | 32.82% | 24.50% |
| mRNA-seq | A34   | 49820286  | 88.0% | 57.2  | 66.10% | 61.14% | 48.93% | 46.37% | 41.14% | 37.02% | 30.74% |
| mRNA-seq | A35   | 42062033  | 97.1% | 64.2  | 70.80% | 65.17% | 54.20% | 52.13% | 47.70% | 43.77% | 36.95% |
| mRNA-seq | A36   | 50385955  | 97.4% | 61.7  | 66.08% | 61.01% | 51.11% | 49.10% | 44.59% | 40.58% | 33.61% |
| mRNA-seq | A37   | 55127067  | 96.5% | 88.2  | 72.38% | 67.28% | 57.14% | 55.56% | 52.32% | 49.56% | 44.50% |
| mRNA-seq | A38   | 45748947  | 97.0% | 24.6  | 63.23% | 57.11% | 40.60% | 36.76% | 29.09% | 23.43% | 15.90% |
| mRNA-seq | A39   | 50275582  | 97.5% | 37.6  | 64.36% | 58.88% | 46.69% | 43.96% | 37.92% | 32.80% | 25.12% |

|          |     |          |       |      |        |        |        |        |        |        |        |
|----------|-----|----------|-------|------|--------|--------|--------|--------|--------|--------|--------|
| mRNA-seq | A40 | 42999582 | 96.3% | 49.7 | 68.83% | 63.29% | 51.67% | 49.32% | 44.06% | 39.41% | 31.45% |
| mRNA-seq | A41 | 43689563 | 96.6% | 50.6 | 64.67% | 59.77% | 49.62% | 47.49% | 42.81% | 38.65% | 31.50% |
| mRNA-seq | A42 | 51482648 | 97.4% | 38.1 | 63.18% | 58.41% | 48.10% | 45.77% | 40.41% | 35.70% | 27.87% |
| mRNA-seq | A43 | 48528152 | 97.1% | 58.9 | 63.59% | 57.30% | 42.90% | 40.23% | 35.20% | 31.51% | 26.21% |
| mRNA-seq | A44 | 49948749 | 97.0% | 35.5 | 64.97% | 59.19% | 45.68% | 42.70% | 36.11% | 30.57% | 22.34% |
| mRNA-seq | A46 | 48214573 | 96.4% | 53.6 | 64.68% | 60.00% | 50.05% | 47.92% | 43.25% | 39.27% | 32.63% |
| mRNA-seq | A47 | 55824284 | 96.6% | 30.2 | 62.53% | 56.19% | 39.98% | 36.67% | 30.30% | 25.57% | 19.00% |
| mRNA-seq | A48 | 47076564 | 97.1% | 76.3 | 67.67% | 63.20% | 54.20% | 52.37% | 48.35% | 44.71% | 38.35% |
| mRNA-seq | A49 | 41575165 | 96.3% | 30.7 | 66.26% | 61.13% | 48.32% | 45.26% | 38.36% | 32.53% | 23.59% |
| mRNA-seq | A50 | 47993093 | 96.7% | 39.2 | 63.25% | 58.49% | 47.28% | 44.61% | 38.59% | 33.52% | 25.53% |
| mRNA-seq | A51 | 42171142 | 97.0% | 26.7 | 60.46% | 54.94% | 40.21% | 36.75% | 29.75% | 24.48% | 17.42% |
| mRNA-seq | A52 | 42118837 | 88.8% | 27.7 | 58.63% | 53.70% | 38.08% | 34.40% | 27.03% | 21.70% | 14.90% |
| mRNA-seq | A54 | 46597748 | 97.0% | 35.8 | 70.86% | 64.45% | 49.57% | 46.39% | 39.47% | 33.58% | 24.72% |
| mRNA-seq | A56 | 50117075 | 97.4% | 58.2 | 66.62% | 62.16% | 52.53% | 50.44% | 45.78% | 41.64% | 34.74% |
| mRNA-seq | A57 | 44856928 | 96.9% | 31.2 | 64.60% | 59.44% | 46.15% | 42.92% | 36.02% | 30.41% | 21.88% |
| mRNA-seq | A58 | 41847859 | 97.6% | 62.6 | 66.18% | 61.70% | 52.79% | 50.97% | 46.89% | 43.26% | 36.94% |
| mRNA-seq | A59 | 48514808 | 97.1% | 66.2 | 66.35% | 61.80% | 52.34% | 50.51% | 46.60% | 43.20% | 37.30% |
| mRNA-seq | A60 | 45695921 | 97.3% | 68.1 | 68.59% | 63.25% | 52.36% | 50.00% | 44.86% | 40.54% | 33.53% |
| mRNA-seq | A61 | 43611765 | 97.2% | 63.5 | 66.97% | 62.34% | 52.18% | 49.87% | 44.80% | 40.33% | 32.97% |
| mRNA-seq | A62 | 41192904 | 97.4% | 49.6 | 67.97% | 62.72% | 51.47% | 49.07% | 43.83% | 39.22% | 31.51% |
| mRNA-seq | A63 | 49753563 | 96.2% | 40.4 | 63.41% | 58.87% | 47.72% | 45.04% | 39.09% | 34.16% | 26.54% |
| mRNA-seq | A64 | 43102272 | 97.4% | 63.5 | 68.21% | 63.08% | 52.74% | 50.71% | 46.29% | 42.36% | 35.66% |
| mRNA-seq | A65 | 59985057 | 97.5% | 89.6 | 70.53% | 65.24% | 55.29% | 53.45% | 49.60% | 46.32% | 40.70% |
| mRNA-seq | A70 | 42576390 | 97.1% | 31.7 | 62.21% | 57.23% | 45.55% | 42.84% | 36.76% | 31.55% | 23.27% |
| mRNA-seq | A71 | 48188588 | 96.6% | 54.6 | 67.80% | 62.48% | 51.44% | 49.19% | 44.25% | 39.89% | 32.65% |
| mRNA-seq | A72 | 45334115 | 96.1% | 35.6 | 70.65% | 65.14% | 51.47% | 48.53% | 42.36% | 37.21% | 28.70% |
| mRNA-seq | A73 | 47010882 | 97.1% | 51.5 | 68.58% | 63.61% | 53.48% | 51.55% | 47.24% | 43.33% | 36.26% |
| mRNA-seq | A74 | 45916235 | 97.3% | 55.2 | 65.61% | 60.86% | 51.73% | 49.85% | 45.56% | 41.64% | 34.57% |
| mRNA-seq | A75 | 59345230 | 97.0% | 60.0 | 69.89% | 64.68% | 54.45% | 52.57% | 48.42% | 44.72% | 37.94% |
| mRNA-seq | A76 | 46617834 | 96.9% | 44.5 | 69.03% | 63.78% | 51.38% | 48.80% | 43.13% | 38.33% | 30.39% |
| mRNA-seq | A77 | 52978608 | 96.6% | 30.3 | 64.89% | 59.48% | 45.26% | 41.87% | 34.78% | 29.20% | 21.14% |
| mRNA-seq | A78 | 46979736 | 97.3% | 65.1 | 66.68% | 61.90% | 52.90% | 51.14% | 47.22% | 43.69% | 37.26% |
| mRNA-seq | A79 | 45789809 | 96.3% | 49.8 | 67.82% | 62.12% | 51.49% | 49.38% | 44.84% | 40.90% | 34.07% |

|          |      |          |       |      |        |        |        |        |        |        |        |
|----------|------|----------|-------|------|--------|--------|--------|--------|--------|--------|--------|
| mRNA-seq | A81  | 54128295 | 92.0% | 49.4 | 68.72% | 63.91% | 53.33% | 51.09% | 46.12% | 41.61% | 33.85% |
| mRNA-seq | A82  | 52734232 | 92.7% | 36.4 | 63.03% | 56.89% | 41.06% | 37.82% | 31.40% | 26.62% | 20.04% |
| mRNA-seq | A83  | 44807974 | 96.3% | 34.5 | 62.44% | 57.74% | 46.98% | 44.41% | 38.53% | 33.37% | 24.78% |
| mRNA-seq | A84  | 58718409 | 95.3% | 62.0 | 67.39% | 62.72% | 52.17% | 49.93% | 45.00% | 40.75% | 33.75% |
| mRNA-seq | A85  | 53322968 | 94.3% | 64.1 | 67.22% | 62.37% | 53.36% | 51.64% | 47.80% | 44.37% | 38.36% |
| mRNA-seq | A86  | 53079798 | 95.4% | 65.3 | 67.59% | 62.28% | 51.99% | 49.97% | 45.45% | 41.45% | 34.70% |
| mRNA-seq | A87  | 44782260 | 96.4% | 49.0 | 68.75% | 63.78% | 52.73% | 50.21% | 44.69% | 40.08% | 32.48% |
| mRNA-seq | A88  | 51451391 | 95.2% | 74.6 | 68.28% | 63.77% | 54.62% | 52.93% | 49.36% | 46.26% | 40.75% |
| mRNA-seq | A89  | 45563271 | 88.7% | 92.0 | 66.51% | 65.15% | 56.14% | 54.66% | 51.58% | 48.99% | 44.34% |
| mRNA-seq | A90  | 46679135 | 91.9% | 61.1 | 63.26% | 58.69% | 49.58% | 47.61% | 43.26% | 39.42% | 33.12% |
| mRNA-seq | A91  | 57522556 | 91.7% | 57.9 | 76.11% | 70.66% | 57.67% | 55.55% | 51.10% | 47.22% | 40.49% |
| mRNA-seq | A93  | 51389811 | 89.6% | 57.1 | 70.11% | 64.43% | 53.74% | 51.76% | 47.54% | 43.69% | 36.96% |
| mRNA-seq | A94  | 47093724 | 90.4% | 48.0 | 72.39% | 67.32% | 55.73% | 53.26% | 47.86% | 43.26% | 35.30% |
| mRNA-seq | A95  | 67068683 | 91.1% | 64.7 | 67.93% | 62.97% | 53.06% | 51.20% | 47.11% | 43.44% | 36.92% |
| mRNA-seq | A96  | 59796727 | 91.1% | 65.2 | 70.55% | 65.85% | 55.86% | 54.00% | 50.08% | 46.64% | 40.70% |
| mRNA-seq | AC06 | 41916821 | 96.9% | 52.9 | 67.31% | 62.21% | 52.75% | 50.90% | 46.67% | 42.87% | 36.00% |
| mRNA-seq | AC11 | 73660948 | 96.6% | 70.0 | 69.82% | 65.06% | 55.00% | 53.08% | 48.98% | 45.43% | 39.22% |
| mRNA-seq | AC16 | 52559092 | 96.8% | 93.0 | 70.45% | 65.59% | 55.64% | 54.02% | 50.59% | 47.61% | 42.29% |
| mRNA-seq | B03  | 45722902 | 90.0% | 67.6 | 64.75% | 62.44% | 53.41% | 51.75% | 48.19% | 45.10% | 39.73% |
| mRNA-seq | B12  | 43266651 | 87.5% | 73.1 | 69.30% | 66.19% | 55.76% | 53.93% | 50.16% | 46.92% | 41.33% |
| mRNA-seq | B13  | 47474445 | 88.5% | 77.9 | 69.15% | 66.55% | 56.83% | 55.19% | 51.81% | 48.95% | 43.94% |
| mRNA-seq | B15  | 48022546 | 86.9% | 70.0 | 70.20% | 66.44% | 55.25% | 53.31% | 49.43% | 46.22% | 40.74% |
| mRNA-seq | B16  | 44462772 | 95.4% | 61.5 | 72.75% | 67.14% | 55.52% | 53.51% | 49.23% | 45.44% | 38.86% |
| mRNA-seq | B17  | 48091465 | 96.9% | 43.9 | 65.83% | 59.98% | 46.21% | 43.07% | 36.59% | 31.58% | 24.51% |
| mRNA-seq | B18  | 40233359 | 85.8% | 72.0 | 67.17% | 63.96% | 51.09% | 48.44% | 43.08% | 38.82% | 32.31% |
| mRNA-seq | C01  | 48640226 | 97.0% | 53.2 | 68.46% | 63.34% | 51.99% | 49.63% | 44.58% | 40.35% | 33.43% |
| mRNA-seq | C05  | 49359215 | 96.8% | 34.8 | 67.87% | 62.46% | 49.77% | 46.95% | 40.70% | 35.27% | 26.62% |
| mRNA-seq | C08  | 44800840 | 96.7% | 60.1 | 67.58% | 63.14% | 53.70% | 51.82% | 47.77% | 44.12% | 37.63% |
| mRNA-seq | C15  | 43057692 | 97.2% | 47.1 | 66.15% | 61.35% | 50.38% | 47.90% | 42.39% | 37.63% | 29.87% |
| mRNA-seq | C17  | 52890175 | 96.7% | 81.4 | 67.28% | 63.07% | 55.38% | 54.06% | 51.20% | 48.61% | 43.66% |
| mRNA-seq | C18  | 43139020 | 97.0% | 58.6 | 68.53% | 63.65% | 54.24% | 52.39% | 48.46% | 44.88% | 38.28% |
| mRNA-seq | C19  | 51596958 | 97.2% | 78.4 | 66.75% | 61.97% | 53.85% | 52.47% | 49.42% | 46.72% | 41.75% |
| mRNA-seq | C20  | 49598991 | 97.0% | 60.0 | 70.39% | 65.00% | 54.44% | 52.49% | 48.23% | 44.49% | 37.75% |

|          |     |          |       |       |        |        |        |        |        |        |        |
|----------|-----|----------|-------|-------|--------|--------|--------|--------|--------|--------|--------|
| mRNA-seq | C21 | 44149239 | 97.1% | 53.2  | 66.23% | 60.85% | 51.48% | 49.65% | 45.49% | 41.55% | 34.45% |
| mRNA-seq | C22 | 50663076 | 97.2% | 49.8  | 66.41% | 61.02% | 50.21% | 48.01% | 43.24% | 38.92% | 31.51% |
| mRNA-seq | C23 | 52777376 | 97.1% | 58.1  | 65.47% | 61.02% | 52.81% | 51.22% | 47.63% | 44.24% | 37.85% |
| mRNA-seq | C24 | 42848202 | 97.0% | 56.3  | 68.47% | 63.39% | 52.96% | 50.90% | 46.50% | 42.61% | 35.67% |
| mRNA-seq | C25 | 47384653 | 96.2% | 50.7  | 71.87% | 66.30% | 55.17% | 53.07% | 48.48% | 44.19% | 36.72% |
| mRNA-seq | C26 | 43659567 | 93.1% | 29.1  | 65.87% | 60.32% | 48.11% | 45.25% | 38.75% | 33.00% | 23.89% |
| mRNA-seq | C27 | 43024036 | 96.8% | 47.5  | 69.56% | 64.09% | 52.88% | 50.71% | 45.94% | 41.72% | 34.37% |
| mRNA-seq | C28 | 43346092 | 96.7% | 52.5  | 69.70% | 64.36% | 53.94% | 52.00% | 47.75% | 43.91% | 37.03% |
| mRNA-seq | C29 | 55740530 | 95.9% | 58.8  | 70.57% | 64.86% | 54.65% | 52.79% | 48.81% | 45.24% | 38.93% |
| mRNA-seq | C30 | 43519107 | 97.1% | 49.1  | 65.68% | 60.80% | 51.15% | 49.13% | 44.59% | 40.55% | 33.20% |
| mRNA-seq | C31 | 46942382 | 96.5% | 44.3  | 66.98% | 62.50% | 53.56% | 51.72% | 47.38% | 43.21% | 35.51% |
| mRNA-seq | C32 | 47576881 | 96.6% | 55.9  | 69.06% | 64.12% | 54.42% | 52.57% | 48.54% | 44.91% | 38.11% |
| mRNA-seq | C33 | 53038862 | 96.6% | 48.4  | 68.60% | 63.71% | 53.40% | 51.22% | 46.32% | 41.89% | 34.25% |
| mRNA-seq | C34 | 42612265 | 97.1% | 50.1  | 69.85% | 64.27% | 53.31% | 51.08% | 46.01% | 41.49% | 33.77% |
| mRNA-seq | C35 | 50778335 | 97.4% | 56.6  | 66.30% | 61.75% | 52.30% | 50.23% | 45.52% | 41.29% | 34.06% |
| mRNA-seq | C36 | 45437202 | 95.6% | 41.5  | 66.56% | 61.38% | 49.65% | 46.98% | 41.16% | 36.19% | 28.38% |
| mRNA-seq | C37 | 44507397 | 97.1% | 52.7  | 64.92% | 60.00% | 50.96% | 49.03% | 44.52% | 40.34% | 32.82% |
| mRNA-seq | C38 | 46159283 | 97.3% | 63.8  | 67.96% | 63.37% | 54.34% | 52.51% | 48.42% | 44.68% | 38.20% |
| mRNA-seq | C39 | 44711921 | 96.6% | 55.0  | 68.35% | 63.56% | 53.91% | 52.01% | 47.89% | 44.16% | 37.18% |
| mRNA-seq | C40 | 40981444 | 97.3% | 41.8  | 63.42% | 58.03% | 44.13% | 40.98% | 34.46% | 29.42% | 22.15% |
| mRNA-seq | C41 | 44029949 | 97.1% | 60.5  | 68.52% | 63.81% | 54.22% | 52.42% | 48.42% | 44.81% | 38.45% |
| mRNA-seq | C43 | 64133859 | 95.2% | 31.4  | 67.96% | 56.70% | 49.72% | 46.94% | 40.82% | 35.44% | 26.61% |
| mRNA-seq | C44 | 53520278 | 89.1% | 105.7 | 70.25% | 61.92% | 57.67% | 56.21% | 53.33% | 50.95% | 46.77% |
| mRNA-seq | C45 | 60960969 | 89.1% | 103.9 | 71.49% | 62.35% | 57.62% | 56.02% | 52.84% | 50.19% | 45.56% |
| mRNA-seq | C47 | 46943156 | 93.0% | 86.7  | 65.10% | 57.20% | 53.16% | 51.79% | 48.86% | 46.24% | 41.43% |
| mRNA-seq | C48 | 54803588 | 94.6% | 71.4  | 71.48% | 61.21% | 56.27% | 54.46% | 50.66% | 47.35% | 41.46% |
| mRNA-seq | C49 | 44836333 | 93.5% | 62.7  | 70.56% | 61.52% | 56.30% | 54.38% | 50.28% | 46.71% | 40.40% |
| mRNA-seq | C51 | 53660217 | 89.4% | 67.5  | 70.77% | 61.31% | 55.66% | 53.59% | 49.26% | 45.59% | 39.28% |
| mRNA-seq | C54 | 43985182 | 92.6% | 52.9  | 67.09% | 57.80% | 52.85% | 50.98% | 46.98% | 43.37% | 36.93% |
| mRNA-seq | C55 | 54105154 | 91.6% | 98.1  | 69.65% | 62.34% | 58.06% | 56.63% | 53.74% | 51.26% | 46.79% |
| mRNA-seq | C56 | 52882478 | 91.7% | 79.6  | 69.60% | 62.17% | 57.71% | 56.11% | 52.80% | 49.86% | 44.56% |
| mRNA-seq | C57 | 57294965 | 90.0% | 109.6 | 73.13% | 64.56% | 60.05% | 58.54% | 55.60% | 53.18% | 48.91% |
| mRNA-seq | C58 | 48575153 | 93.1% | 91.2  | 72.08% | 63.77% | 59.09% | 57.47% | 54.19% | 51.43% | 46.65% |

|          |     |          |       |       |        |        |        |        |        |        |        |
|----------|-----|----------|-------|-------|--------|--------|--------|--------|--------|--------|--------|
| mRNA-seq | C59 | 50908102 | 92.8% | 93.6  | 70.84% | 62.87% | 58.36% | 56.79% | 53.69% | 51.15% | 46.77% |
| mRNA-seq | C61 | 50492615 | 88.8% | 87.8  | 67.60% | 59.55% | 55.56% | 54.17% | 51.24% | 48.66% | 44.01% |
| mRNA-seq | C63 | 48623617 | 93.5% | 77.7  | 66.41% | 58.92% | 54.83% | 53.37% | 50.25% | 47.45% | 42.40% |
| mRNA-seq | C64 | 56125359 | 93.6% | 96.7  | 72.57% | 63.82% | 59.06% | 57.46% | 54.27% | 51.59% | 46.74% |
| mRNA-seq | C65 | 58279687 | 89.0% | 44.5  | 66.50% | 57.36% | 51.82% | 49.71% | 45.08% | 40.92% | 33.61% |
| mRNA-seq | C66 | 51178448 | 91.5% | 65.2  | 68.90% | 60.50% | 55.30% | 53.37% | 49.31% | 45.83% | 39.88% |
| mRNA-seq | C67 | 46257360 | 94.7% | 79.5  | 66.73% | 58.72% | 54.33% | 52.66% | 49.13% | 46.03% | 40.48% |
| mRNA-seq | C68 | 54243959 | 88.3% | 49.6  | 67.09% | 56.76% | 50.48% | 48.07% | 42.76% | 38.05% | 30.23% |
| mRNA-seq | C69 | 56733676 | 87.9% | 58.7  | 71.29% | 61.33% | 55.94% | 53.99% | 49.89% | 46.19% | 39.60% |
| mRNA-seq | C70 | 64696190 | 94.3% | 74.1  | 70.26% | 60.83% | 56.16% | 54.51% | 51.09% | 48.07% | 42.46% |
| mRNA-seq | C71 | 47422539 | 93.0% | 72.0  | 69.79% | 61.16% | 56.69% | 55.07% | 51.59% | 48.46% | 42.78% |
| mRNA-seq | C72 | 45963188 | 90.7% | 60.9  | 68.56% | 60.27% | 55.15% | 53.16% | 48.76% | 44.84% | 38.09% |
| mRNA-seq | C73 | 63604360 | 90.2% | 99.8  | 69.74% | 61.27% | 56.72% | 55.13% | 51.87% | 49.09% | 44.28% |
| mRNA-seq | C74 | 51184219 | 91.7% | 68.5  | 69.18% | 61.41% | 56.74% | 55.15% | 51.82% | 48.79% | 43.14% |
| mRNA-seq | C75 | 61160951 | 89.6% | 88.0  | 72.91% | 64.89% | 59.86% | 58.07% | 54.41% | 51.25% | 45.71% |
| mRNA-seq | C76 | 55033197 | 93.6% | 97.2  | 72.08% | 63.84% | 59.32% | 57.75% | 54.63% | 52.04% | 47.51% |
| mRNA-seq | C77 | 60543298 | 90.4% | 102.6 | 70.25% | 63.14% | 59.03% | 57.66% | 54.91% | 52.66% | 48.66% |
| mRNA-seq | C78 | 57149898 | 93.9% | 34.3  | 68.10% | 57.56% | 51.00% | 48.41% | 42.66% | 37.66% | 29.43% |
| mRNA-seq | C79 | 57399051 | 91.9% | 87.4  | 71.63% | 62.96% | 58.04% | 56.23% | 52.50% | 49.30% | 43.62% |
| mRNA-seq | C80 | 57296617 | 94.0% | 62.5  | 70.60% | 60.79% | 55.64% | 53.74% | 49.70% | 46.19% | 40.02% |
| mRNA-seq | C81 | 57239144 | 90.6% | 99.2  | 71.97% | 64.34% | 59.90% | 58.39% | 55.39% | 52.84% | 48.41% |
| mRNA-seq | C82 | 55116502 | 93.0% | 88.5  | 73.23% | 64.54% | 59.66% | 57.96% | 54.55% | 51.70% | 46.65% |
| mRNA-seq | C83 | 58242432 | 92.2% | 104.0 | 71.53% | 64.05% | 59.28% | 57.68% | 54.65% | 52.17% | 47.84% |
| mRNA-seq | C84 | 48666563 | 93.5% | 79.0  | 69.89% | 61.50% | 56.75% | 55.09% | 51.64% | 48.68% | 43.31% |
| mRNA-seq | C85 | 53829979 | 89.6% | 68.9  | 65.78% | 57.41% | 53.07% | 51.51% | 48.17% | 45.20% | 39.78% |
| mRNA-seq | C86 | 52866962 | 91.6% | 92.7  | 69.45% | 61.85% | 57.41% | 55.90% | 52.85% | 50.23% | 45.51% |
| mRNA-seq | C87 | 65054132 | 94.0% | 38.8  | 65.58% | 55.37% | 49.80% | 47.61% | 42.77% | 38.46% | 31.00% |
| mRNA-seq | C88 | 50747792 | 93.6% | 85.0  | 68.99% | 60.88% | 56.31% | 54.75% | 51.58% | 48.87% | 43.90% |
| mRNA-seq | C89 | 51473715 | 93.6% | 94.4  | 69.04% | 61.44% | 57.23% | 55.78% | 52.83% | 50.30% | 45.81% |
| mRNA-seq | C90 | 55504963 | 88.0% | 43.5  | 67.15% | 57.62% | 52.05% | 49.87% | 45.09% | 40.82% | 33.43% |
| mRNA-seq | C91 | 56979003 | 88.3% | 98.5  | 71.24% | 62.50% | 58.07% | 56.57% | 53.42% | 50.70% | 45.89% |
| mRNA-seq | C93 | 60407391 | 87.7% | 85.2  | 70.56% | 62.08% | 57.62% | 56.09% | 52.95% | 50.30% | 45.51% |
| mRNA-seq | C94 | 54869306 | 87.6% | 56.5  | 66.73% | 55.05% | 48.11% | 45.43% | 39.82% | 35.37% | 28.57% |



|          |       |           |       |      |        |        |        |        |        |        |        |
|----------|-------|-----------|-------|------|--------|--------|--------|--------|--------|--------|--------|
| mRNA-seq | C95   | 46677801  | 89.1% | 50.0 | 69.52% | 59.45% | 53.53% | 51.29% | 46.36% | 41.95% | 34.25% |
| mRNA-seq | C97   | 48165218  | 88.3% | 59.0 | 70.81% | 61.16% | 55.39% | 53.24% | 48.70% | 44.71% | 37.64% |
| mRNA-seq | C98   | 48160864  | 89.7% | 68.2 | 66.48% | 57.69% | 52.89% | 51.09% | 47.21% | 43.85% | 37.83% |
| mRNA-seq | C100  | 46918546  | 89.6% | 49.1 | 66.30% | 57.26% | 52.02% | 50.04% | 45.73% | 41.87% | 34.88% |
| mRNA-seq | C101  | 46686538  | 88.7% | 42.7 | 63.95% | 55.03% | 49.86% | 47.79% | 43.10% | 38.79% | 31.34% |
| mRNA-seq | C102  | 44028769  | 88.3% | 59.9 | 67.81% | 58.83% | 53.94% | 52.11% | 48.05% | 44.37% | 37.75% |
| mRNA-seq | CA69  | 38623424  | 97.4% | 51.5 | 66.30% | 61.18% | 50.69% | 48.45% | 43.45% | 38.92% | 31.29% |
| mRNA-seq | CA80  | 45967502  | 97.0% | 58.6 | 67.34% | 62.33% | 52.05% | 49.89% | 45.15% | 41.02% | 33.92% |
| mRNA-seq | CA92  | 86966506  | 90.8% | 85.5 | 72.68% | 67.18% | 54.85% | 52.57% | 48.07% | 44.59% | 39.17% |
| mRNA-seq | CA97  | 66656727  | 90.9% | 75.4 | 70.37% | 65.61% | 56.12% | 54.29% | 50.37% | 47.07% | 41.48% |
| WGS      | A20A  | 557500841 | 99.4% | 25.6 | 92.37% | 92.26% | 91.81% | 91.14% | 87.23% | 78.93% | 33.03% |
| WGS      | A20C  | 554660783 | 99.4% | 25.2 | 92.37% | 92.28% | 91.79% | 91.04% | 86.71% | 77.43% | 30.19% |
| WGS      | A36A  | 587832023 | 99.2% | 26.6 | 92.35% | 92.24% | 91.85% | 91.31% | 87.82% | 80.30% | 38.84% |
| WGS      | A36C  | 564698093 | 99.3% | 25.7 | 92.36% | 92.26% | 91.80% | 91.11% | 87.02% | 78.30% | 33.18% |
| WGS      | A37A  | 593459702 | 99.4% | 27.1 | 91.71% | 91.58% | 91.40% | 91.21% | 89.72% | 84.13% | 41.08% |
| WGS      | A37C  | 576049088 | 95.7% | 25.3 | 91.71% | 91.60% | 91.37% | 91.10% | 88.88% | 80.36% | 30.44% |
| WGS      | A41A  | 707372963 | 99.3% | 16.7 | 46.77% | 46.74% | 46.68% | 46.62% | 46.14% | 44.80% | 33.61% |
| WGS      | A41C  | 646790056 | 99.1% | 15.8 | 49.60% | 49.57% | 49.50% | 49.44% | 48.96% | 47.11% | 29.36% |
| WGS      | A47A  | 655864732 | 99.4% | 29.9 | 91.72% | 91.59% | 91.45% | 91.31% | 90.39% | 87.28% | 57.46% |
| WGS      | A47C  | 641068663 | 99.3% | 29.1 | 91.72% | 91.61% | 91.47% | 91.34% | 90.41% | 86.95% | 52.99% |
| WGS      | A74A  | 635137485 | 99.4% | 28.9 | 92.37% | 92.29% | 91.99% | 91.56% | 88.70% | 83.02% | 51.78% |
| WGS      | A74C  | 601139599 | 99.3% | 27.3 | 92.37% | 92.28% | 91.92% | 91.38% | 87.92% | 80.79% | 42.66% |
| WGS      | A96A  | 577971904 | 99.5% | 26.3 | 92.36% | 92.20% | 91.64% | 91.05% | 87.43% | 76.92% | 36.16% |
| WGS      | A96C  | 696071210 | 99.2% | 31.7 | 92.37% | 92.29% | 92.06% | 91.79% | 89.86% | 85.67% | 64.80% |
| WGS      | C08A  | 565823199 | 99.4% | 25.6 | 91.71% | 91.56% | 91.26% | 90.83% | 87.44% | 76.60% | 28.83% |
| WGS      | C08C  | 584734725 | 99.4% | 26.5 | 91.73% | 91.60% | 91.41% | 91.20% | 89.51% | 83.04% | 37.27% |
| WGS      | CA97A | 594020294 | 99.3% | 26.9 | 92.37% | 92.26% | 91.79% | 91.10% | 86.72% | 78.40% | 41.37% |
| WGS      | CA97C | 724088801 | 99.5% | 33.0 | 92.37% | 92.30% | 92.11% | 91.89% | 90.27% | 86.48% | 69.03% |

---

**Table S16. Primers used for multiplex nested PCR (F1/R1, outside; F2/R2, inside)**

| Group ZNF384 |    |                            |    |             |                                 |
|--------------|----|----------------------------|----|-------------|---------------------------------|
| EP300-F1     | 5' | CATCTTCTCGACAAATCATTTCACA  | 3' | EP300-F2    | 5' CAAAAATGCTGGTGATAAGAGAAAT 3' |
| CREBBP-F1    | 5' | ATGCTCATAAGTGTCAGAGACGAGA  | 3' | CREBBP-F2   | 5' AGCAAACGGAGAGGTTCTGGG 3'     |
| EWSR1-F1     | 5' | CAGTTACTCTCAGCAGAACACCTATG | 3' | EWSR1-F2    | 5' TCCAAGTCAATATAGCCAACAGAG 3'  |
| TCF3-F1      | 5' | GTGGGCAGCAGTGGAAGCA        | 3' | TCF3-F2     | 5' CCAGCACGAGCGTATGGGCTA 3'     |
| TAF15-F1     | 5' | TGGTGGTTATGAGAATCAAAAGCA   | 3' | TAF15-F2    | 5' AGCCAGCAACCATATAATAACCAG 3'  |
| ZNF384-R1    | 5' | GCAGGCACTGTCAGCAAGGTG      | 3' | ZNF384-R2   | 5' CATTGTGTTCTCGATCTGACCTGA 3'  |
| Group MEF2D  |    |                            |    |             |                                 |
| MEF2D-F1     | 5' | TGCCCGTGTCCAATCAGAGC       | 3' | MEF2D-F2    | 5' AGCAGCCAGCACTACAGAGGAA 3'    |
| BCL9-R1      | 5' | GGCATTGGAGAGGGGCATC        | 3' | BCL9-R2     | 5' CTGATTGGAGTGAGAAAGTGGCT 3'   |
| HNRNPUL1-R1  | 5' | TGCAGCTCAATGAACAGAACCT     | 3' | HNRNPUL1-R2 | 5' ATCCAGGAAGTCCCCAACATCT 3'    |
| SS18-R1      | 5' | CCTGTTGAGGAGGTCTATAGGGA    | 3' | SS18-R2     | 5' GATTGCCTTGGTTAACTTGACC 3'    |
| DAZAP1-R1    | 5' | ACCATAAGACTGTAAACAAAGTGTGG | 3' | DAZAP1-R2   | 5' GAGTGGCTGGTGGAGGAGGAA 3'     |

**Table S17. Gene burden analysis**

Notes:

n\_nonsilent, number of non-silent mutations in this gene

n\_silent, number of silent mutations in this gene

n\_noncoding, number of non-coding mutations

*P* value, calculated by MutSigCV, by testing whether the observed mutations in a gene significantly exceeded the expected counts based on the background model. Genes with  $P < 0.05$  are presented.

FDR, false-discovery rates after multiple testing correction.

| Gene         | N_nonsilent | N_silent | N_noncoding | <i>P</i> value | FDR      |
|--------------|-------------|----------|-------------|----------------|----------|
| <i>NRAS</i>  | 29          | 0        | 0           | 0              | 0        |
| <i>PAX5</i>  | 19          | 0        | 0           | 1.57E-14       | 1.48E-10 |
| <i>KRAS</i>  | 15          | 0        | 0           | 9.84E-12       | 6.19E-08 |
| <i>RUNX1</i> | 6           | 0        | 0           | 3.39E-07       | 1.60E-03 |
| <i>FLT3</i>  | 14          | 1        | 0           | 3.34E-05       | 1.26E-01 |

|                  |    |   |   |          |          |
|------------------|----|---|---|----------|----------|
| <i>MLL2</i>      | 14 | 1 | 0 | 4.03E-05 | 1.27E-01 |
| <i>PTPN11</i>    | 9  | 1 | 0 | 1.48E-04 | 3.74E-01 |
| <i>SPRR3</i>     | 3  | 0 | 0 | 1.58E-04 | 3.74E-01 |
| <i>UBA2</i>      | 5  | 0 | 0 | 1.90E-04 | 3.98E-01 |
| <i>SETD2</i>     | 15 | 0 | 0 | 2.37E-04 | 4.47E-01 |
| <i>BTG1</i>      | 2  | 0 | 0 | 3.30E-04 | 5.66E-01 |
| <i>CGREF1</i>    | 4  | 0 | 0 | 4.12E-04 | 6.48E-01 |
| <i>XBP1</i>      | 3  | 0 | 0 | 7.19E-04 | 9.68E-01 |
| <i>ATXN3</i>     | 3  | 0 | 0 | 7.84E-04 | 9.85E-01 |
| <i>CDKN2A</i>    | 4  | 0 | 0 | 1.05E-03 | 1        |
| <i>IL1RN</i>     | 2  | 0 | 0 | 1.19E-03 | 1        |
| <i>EZH2</i>      | 6  | 0 | 0 | 1.74E-03 | 1        |
| <i>RPL5</i>      | 2  | 0 | 0 | 2.56E-03 | 1        |
| <i>DCTN5</i>     | 3  | 0 | 0 | 3.02E-03 | 1        |
| <i>NCBP2</i>     | 3  | 0 | 0 | 3.07E-03 | 1        |
| <i>IKZF1</i>     | 4  | 0 | 0 | 3.23E-03 | 1        |
| <i>GNB1</i>      | 4  | 1 | 0 | 3.41E-03 | 1        |
| <i>RPTN</i>      | 10 | 3 | 0 | 3.73E-03 | 1        |
| <i>HIST1H2AG</i> | 2  | 0 | 0 | 3.78E-03 | 1        |
| <i>TP53</i>      | 3  | 0 | 0 | 4.87E-03 | 1        |
| <i>BRAF</i>      | 5  | 0 | 0 | 6.86E-03 | 1        |
| <i>ETV6</i>      | 4  | 0 | 0 | 8.29E-03 | 1        |
| <i>SPEF2</i>     | 4  | 0 | 0 | 8.44E-03 | 1        |
| <i>RIT1</i>      | 3  | 0 | 0 | 8.60E-03 | 1        |
| <i>RGS19</i>     | 2  | 0 | 0 | 1.01E-02 | 1        |
| <i>ZFP36L2</i>   | 2  | 0 | 0 | 1.12E-02 | 1        |
| <i>FABP2</i>     | 2  | 0 | 0 | 1.15E-02 | 1        |
| <i>ANO5</i>      | 5  | 0 | 0 | 1.35E-02 | 1        |
| <i>CISD1</i>     | 1  | 0 | 0 | 1.91E-02 | 1        |
| <i>GPR137C</i>   | 2  | 0 | 0 | 2.02E-02 | 1        |
| <i>EVI5L</i>     | 3  | 0 | 0 | 2.11E-02 | 1        |
| <i>SH3BGRL2</i>  | 1  | 0 | 0 | 2.20E-02 | 1        |
| <i>TMEM14E</i>   | 1  | 0 | 0 | 2.25E-02 | 1        |

|                  |   |   |   |          |   |
|------------------|---|---|---|----------|---|
| <i>SATL1</i>     | 3 | 0 | 0 | 2.33E-02 | 1 |
| <i>MYC</i>       | 3 | 0 | 0 | 2.33E-02 | 1 |
| <i>TMEM92</i>    | 1 | 0 | 0 | 2.34E-02 | 1 |
| <i>UPP2</i>      | 3 | 0 | 0 | 2.36E-02 | 1 |
| <i>TMEM87B</i>   | 2 | 0 | 0 | 2.39E-02 | 1 |
| <i>TAF15</i>     | 2 | 1 | 0 | 2.69E-02 | 1 |
| <i>L3MBTL3</i>   | 3 | 0 | 0 | 2.69E-02 | 1 |
| <i>PTH2</i>      | 1 | 0 | 0 | 2.84E-02 | 1 |
| <i>BATF3</i>     | 1 | 0 | 0 | 2.90E-02 | 1 |
| <i>GOLT1B</i>    | 1 | 0 | 0 | 2.96E-02 | 1 |
| <i>FARS2</i>     | 2 | 0 | 0 | 3.01E-02 | 1 |
| <i>P4HA2</i>     | 3 | 0 | 0 | 3.15E-02 | 1 |
| <i>RHOJ</i>      | 2 | 0 | 0 | 3.22E-02 | 1 |
| <i>FAM151A</i>   | 3 | 0 | 0 | 3.26E-02 | 1 |
| <i>PDE1A</i>     | 2 | 0 | 0 | 3.43E-02 | 1 |
| <i>KCNMB4</i>    | 1 | 0 | 0 | 3.75E-02 | 1 |
| <i>PLA2G7</i>    | 2 | 0 | 0 | 3.78E-02 | 1 |
| <i>GBAS</i>      | 1 | 0 | 0 | 3.97E-02 | 1 |
| <i>TPCN2</i>     | 2 | 0 | 0 | 3.99E-02 | 1 |
| <i>UBE2D3</i>    | 2 | 0 | 0 | 3.99E-02 | 1 |
| <i>RFC2</i>      | 2 | 0 | 0 | 4.07E-02 | 1 |
| <i>CREBBP</i>    | 5 | 0 | 0 | 4.14E-02 | 1 |
| <i>ITGA6</i>     | 2 | 0 | 0 | 4.16E-02 | 1 |
| <i>XDH</i>       | 4 | 0 | 0 | 4.21E-02 | 1 |
| <i>AHRR</i>      | 2 | 1 | 0 | 4.29E-02 | 1 |
| <i>XRRR1</i>     | 2 | 0 | 0 | 4.37E-02 | 1 |
| <i>ASXL1</i>     | 4 | 1 | 0 | 4.38E-02 | 1 |
| <i>YOD1</i>      | 1 | 0 | 0 | 4.46E-02 | 1 |
| <i>PNPLA4</i>    | 1 | 0 | 0 | 4.47E-02 | 1 |
| <i>LYSMD2</i>    | 1 | 0 | 0 | 4.60E-02 | 1 |
| <i>CTTNBP2NL</i> | 2 | 0 | 0 | 4.72E-02 | 1 |
| <i>NF1</i>       | 5 | 1 | 0 | 4.95E-02 | 1 |
| <i>ALLC</i>      | 1 | 0 | 0 | 4.97E-02 | 1 |

---

**Table S18. List of Ph-like cases and characteristic gene abnormalities.**

| <b>Sample ID</b> | <b>gene abnormalities</b>       |
|------------------|---------------------------------|
| C64              |                                 |
| A89              | SNX29-JAK2                      |
| CA97             | EBF1-JAK2                       |
| C49              | NUP214-ABL1                     |
| A03              | NUP214-ABL1, IKZF1 deletion     |
| A81              | Ik6 variant of IKZF1            |
| A84              | Ik6 variant of IKZF1            |
| A14              | IKZF1 deletion, FLT3 p.Y842C    |
| A40              | IKZF1 deletion                  |
| A87              | PAX5-JAK2                       |
| B17              | P2RY8-CRLF2                     |
| C33              | ETV6-ABL1                       |
| A46              | IGH-CRLF2, JAK2 p.R683S/p.T875N |
